# Supplementary material for: Full reconstruction of large lobula plate tangential cells in Drosophila from a 3D EM dataset
Source: PLoS One. 2018 Nov 28;13(11):e0207828. doi: 10.1371/journal.pone.0207828 (PMC6261601; doi:10.1371/journal.pone.0207828)
Supplement: S1 Dataset — (ZIP) [file pone.0207828.s001.zip › Diameter hoc/VS_VSL_preliminary/VS4_skels_ck.001_completed.hoc0002.hoc]

/* created with convertKnossosNmlToHoc.m */

{create adhoc1}
{access adhoc1}
{nseg = 1}
{strdef color color = "White"}
{pt3dclear()}
{pt3dadd(196332.000000,125988.000000,87250.000000,6.449724)}
{pt3dadd(196404.000000,126264.000000,87075.000000,4.441498)}
{pt3dadd(196464.000000,126492.000000,86800.000000,3.264899)}
{pt3dadd(196596.000000,127008.000000,86600.000000,3.522888)}
{pt3dadd(196596.000000,127068.000000,86350.000000,2.747934)}
{pt3dadd(196260.000000,127296.000000,86100.000000,2.747934)}
{pt3dadd(196080.000000,127656.000000,85850.000000,2.747934)}
{pt3dadd(195936.000000,127704.000000,85650.000000,3.737879)}
{pt3dadd(195852.000000,127752.000000,85425.000000,2.489945)}
{pt3dadd(195804.000000,127968.000000,85200.000000,2.489945)}
{pt3dadd(195660.000000,127908.000000,84900.000000,2.489945)}
{pt3dadd(195600.000000,128316.000000,84550.000000,4.047465)}
{pt3dadd(195564.000000,128304.000000,84225.000000,3.057520)}
{pt3dadd(195456.000000,128484.000000,83950.000000,3.057520)}
{pt3dadd(195516.000000,128640.000000,83700.000000,3.057520)}
{pt3dadd(195672.000000,128544.000000,83450.000000,6.609275)}
{pt3dadd(195852.000000,128724.000000,83125.000000,5.051754)}
{pt3dadd(195792.000000,128928.000000,82950.000000,5.051754)}
{pt3dadd(195864.000000,129132.000000,82725.000000,5.051754)}
{pt3dadd(195960.000000,129396.000000,82525.000000,7.961550)}
{pt3dadd(196032.000000,129456.000000,82250.000000,4.409795)}
{pt3dadd(196188.000000,129576.000000,81950.000000,4.409795)}
{pt3dadd(196260.000000,129576.000000,82075.000000,7.319591)}
{pt3dadd(196368.000000,129732.000000,81925.000000,10.229386)}
{pt3dadd(196728.000000,130116.000000,81650.000000,11.199318)}
{pt3dadd(196836.000000,130692.000000,81400.000000,16.048977)}

{create adhoc2}
{access adhoc2}
{connect adhoc2(1), adhoc1(0)}
{nseg = 1}
{strdef color color = "White"}
{pt3dclear()}
{pt3dadd(196836.000000,130692.000000,81400.000000,16.048977)}
{pt3dadd(196884.000000,131316.000000,81600.000000,10.307708)}
{pt3dadd(196932.000000,131964.000000,81825.000000,6.784625)}
{pt3dadd(196896.000000,132312.000000,82100.000000,8.196935)}
{pt3dadd(196836.000000,132756.000000,82350.000000,5.822105)}
{pt3dadd(196692.000000,132900.000000,82625.000000,5.822105)}
{pt3dadd(196884.000000,133140.000000,83025.000000,5.822105)}
{pt3dadd(197028.000000,133092.000000,83350.000000,7.751130)}
{pt3dadd(197208.000000,133176.000000,83700.000000,3.429025)}
{pt3dadd(197220.000000,133104.000000,83975.000000,3.429025)}
{pt3dadd(197064.000000,133356.000000,84250.000000,3.429025)}
{pt3dadd(197100.000000,133728.000000,84525.000000,4.986545)}
{pt3dadd(197148.000000,133980.000000,84775.000000,3.057520)}
{pt3dadd(196980.000000,133884.000000,85100.000000,4.986545)}
{pt3dadd(197040.000000,133620.000000,85375.000000,6.234479)}
{pt3dadd(197256.000000,133464.000000,85875.000000,6.794931)}
{pt3dadd(197748.000000,132912.000000,86200.000000,7.739669)}

{create adhoc3}
{access adhoc3}
{connect adhoc3(1), adhoc1(0)}
{nseg = 1}
{strdef color color = "White"}
{pt3dclear()}
{pt3dadd(196836.000000,130692.000000,81400.000000,16.048977)}
{pt3dadd(197112.000000,130428.000000,81075.000000,12.269250)}
{pt3dadd(197652.000000,130512.000000,80650.000000,7.961550)}
{pt3dadd(198012.000000,130488.000000,80175.000000,8.603509)}
{pt3dadd(198648.000000,130740.000000,79700.000000,5.051754)}
{pt3dadd(198516.000000,130716.000000,79900.000000,5.051754)}
{pt3dadd(198312.000000,130824.000000,79675.000000,5.051754)}
{pt3dadd(198132.000000,130908.000000,79625.000000,9.373860)}
{pt3dadd(198024.000000,131388.000000,79300.000000,5.822105)}
{pt3dadd(197940.000000,131952.000000,78900.000000,5.822105)}
{pt3dadd(197868.000000,132756.000000,78475.000000,13.509103)}
{pt3dadd(197676.000000,133008.000000,78025.000000,22.793501)}
{pt3dadd(197580.000000,133068.000000,77600.000000,29.785660)}
{pt3dadd(197460.000000,132720.000000,77150.000000,47.921990)}

{create adhoc4}
{access adhoc4}
{connect adhoc4(1), adhoc3(0)}
{nseg = 1}
{strdef color color = "White"}
{pt3dclear()}
{pt3dadd(197460.000000,132720.000000,77150.000000,47.921990)}
{pt3dadd(196980.000000,132444.000000,76525.000000,21.823656)}
{pt3dadd(196752.000000,132156.000000,76175.000000,13.694193)}
{pt3dadd(196632.000000,131868.000000,76200.000000,8.731901)}
{pt3dadd(196440.000000,131448.000000,76050.000000,5.822105)}
{pt3dadd(196212.000000,131124.000000,76050.000000,5.822105)}
{pt3dadd(195960.000000,130668.000000,76125.000000,5.822105)}
{pt3dadd(195756.000000,130452.000000,75925.000000,9.373860)}
{pt3dadd(195528.000000,129864.000000,75925.000000,5.051754)}
{pt3dadd(195360.000000,129528.000000,75900.000000,5.051754)}
{pt3dadd(195168.000000,129156.000000,76000.000000,5.051754)}
{pt3dadd(194976.000000,128808.000000,75900.000000,8.603509)}
{pt3dadd(194784.000000,128136.000000,75875.000000,5.051754)}
{pt3dadd(194640.000000,127584.000000,75700.000000,5.051754)}
{pt3dadd(194496.000000,127368.000000,75575.000000,5.051754)}
{pt3dadd(194352.000000,126912.000000,75500.000000,9.373860)}
{pt3dadd(194196.000000,126180.000000,75475.000000,5.822105)}
{pt3dadd(194064.000000,125616.000000,75500.000000,5.822105)}
{pt3dadd(193896.000000,124980.000000,75500.000000,5.822105)}
{pt3dadd(193764.000000,124524.000000,75575.000000,10.144211)}
{pt3dadd(193620.000000,124044.000000,75650.000000,5.822105)}
{pt3dadd(193440.000000,123792.000000,75400.000000,5.822105)}
{pt3dadd(193224.000000,123564.000000,75525.000000,5.822105)}
{pt3dadd(193020.000000,123240.000000,75600.000000,10.144211)}
{pt3dadd(192840.000000,122856.000000,75525.000000,5.822105)}
{pt3dadd(192684.000000,122400.000000,75425.000000,5.822105)}
{pt3dadd(192504.000000,121812.000000,75225.000000,5.822105)}
{pt3dadd(192324.000000,121152.000000,75150.000000,9.373860)}
{pt3dadd(192384.000000,120852.000000,75125.000000,5.051754)}
{pt3dadd(192300.000000,120564.000000,75150.000000,5.051754)}
{pt3dadd(192108.000000,120300.000000,75100.000000,5.051754)}
{pt3dadd(191916.000000,120012.000000,75050.000000,9.373860)}
{pt3dadd(191868.000000,119772.000000,74925.000000,5.822105)}
{pt3dadd(191940.000000,119508.000000,74875.000000,5.822105)}
{pt3dadd(191856.000000,119268.000000,74900.000000,5.822105)}
{pt3dadd(191772.000000,119028.000000,74750.000000,10.144211)}
{pt3dadd(191688.000000,118788.000000,74850.000000,10.144211)}
{pt3dadd(191616.000000,118512.000000,74650.000000,14.103943)}
{pt3dadd(191544.000000,118296.000000,74450.000000,22.506572)}
{pt3dadd(191472.000000,118032.000000,74450.000000,21.298662)}

{create adhoc5}
{access adhoc5}
{connect adhoc5(1), adhoc4(0)}
{nseg = 1}
{strdef color color = "White"}
{pt3dclear()}
{pt3dadd(191472.000000,118032.000000,74450.000000,21.298662)}
{pt3dadd(191364.000000,117744.000000,74000.000000,15.303063)}
{pt3dadd(191316.000000,117468.000000,73775.000000,9.781838)}
{pt3dadd(191100.000000,117216.000000,73425.000000,9.373860)}
{pt3dadd(190812.000000,116952.000000,73050.000000,7.961550)}
{pt3dadd(190620.000000,116580.000000,72825.000000,12.269250)}
{pt3dadd(190512.000000,116244.000000,72825.000000,16.048977)}

{create adhoc6}
{access adhoc6}
{connect adhoc6(1), adhoc5(0)}
{nseg = 1}
{strdef color color = "White"}
{pt3dclear()}
{pt3dadd(190512.000000,116244.000000,72825.000000,16.048977)}
{pt3dadd(190368.000000,115044.000000,72950.000000,11.199318)}
{pt3dadd(190068.000000,113964.000000,73025.000000,7.319591)}
{pt3dadd(189840.000000,113616.000000,73375.000000,6.784625)}
{pt3dadd(189624.000000,113316.000000,73250.000000,3.874829)}
{pt3dadd(189456.000000,113160.000000,73200.000000,3.874829)}
{pt3dadd(189300.000000,112812.000000,73225.000000,3.874829)}
{pt3dadd(189180.000000,112668.000000,73200.000000,6.784625)}
{pt3dadd(189048.000000,112020.000000,73175.000000,4.409795)}
{pt3dadd(188892.000000,111612.000000,73050.000000,4.409795)}
{pt3dadd(188736.000000,111468.000000,73175.000000,4.409795)}
{pt3dadd(188784.000000,111156.000000,73200.000000,6.784625)}
{pt3dadd(188868.000000,110892.000000,73500.000000,5.803854)}
{pt3dadd(188820.000000,110784.000000,73675.000000,7.051788)}
{pt3dadd(188808.000000,110760.000000,73875.000000,10.752980)}
{pt3dadd(188856.000000,110844.000000,74050.000000,7.739669)}

{create adhoc7}
{access adhoc7}
{connect adhoc7(1), adhoc5(0)}
{nseg = 1}
{strdef color color = "White"}
{pt3dclear()}
{pt3dadd(190512.000000,116244.000000,72825.000000,16.048977)}
{pt3dadd(190380.000000,116832.000000,72200.000000,13.553168)}
{pt3dadd(190176.000000,116892.000000,71825.000000,8.731901)}
{pt3dadd(190008.000000,117060.000000,71300.000000,10.144211)}
{pt3dadd(189828.000000,116844.000000,71200.000000,5.822105)}
{pt3dadd(189780.000000,117240.000000,70975.000000,5.822105)}
{pt3dadd(189660.000000,117504.000000,71000.000000,5.822105)}
{pt3dadd(189432.000000,117804.000000,70775.000000,8.731901)}
{pt3dadd(189432.000000,118080.000000,70725.000000,4.409795)}
{pt3dadd(189492.000000,118380.000000,70650.000000,4.409795)}
{pt3dadd(189516.000000,118668.000000,70600.000000,4.409795)}
{pt3dadd(189576.000000,118932.000000,70500.000000,6.784625)}
{pt3dadd(189540.000000,119232.000000,70400.000000,3.874829)}
{pt3dadd(189612.000000,119544.000000,70275.000000,3.874829)}
{pt3dadd(189564.000000,119760.000000,70200.000000,3.874829)}
{pt3dadd(189420.000000,119964.000000,70000.000000,4.864774)}
{pt3dadd(189348.000000,120204.000000,70075.000000,2.489945)}
{pt3dadd(189336.000000,120456.000000,70125.000000,2.489945)}
{pt3dadd(189204.000000,120276.000000,70150.000000,2.489945)}
{pt3dadd(188964.000000,121032.000000,70225.000000,5.399740)}
{pt3dadd(188784.000000,121164.000000,70225.000000,5.657729)}
{pt3dadd(188616.000000,121080.000000,70025.000000,8.429549)}
{pt3dadd(188496.000000,120924.000000,69750.000000,7.739669)}

{create adhoc8}
{access adhoc8}
{connect adhoc8(1), adhoc4(0)}
{nseg = 1}
{strdef color color = "White"}
{pt3dclear()}
{pt3dadd(191472.000000,118032.000000,74450.000000,21.298662)}
{pt3dadd(190632.000000,117876.000000,74950.000000,12.949213)}
{pt3dadd(190548.000000,117648.000000,75200.000000,8.369528)}
{pt3dadd(190284.000000,117504.000000,75550.000000,5.005590)}
{pt3dadd(190344.000000,117576.000000,75825.000000,3.343729)}
{pt3dadd(190224.000000,117396.000000,76175.000000,4.572881)}
{pt3dadd(190224.000000,117576.000000,76525.000000,7.739669)}

{create adhoc9}
{access adhoc9}
{connect adhoc9(1), adhoc3(0)}
{nseg = 1}
{strdef color color = "White"}
{pt3dclear()}
{pt3dadd(197460.000000,132720.000000,77150.000000,47.921990)}
{pt3dadd(197568.000000,132900.000000,77100.000000,35.642792)}
{pt3dadd(197640.000000,133176.000000,76975.000000,21.985675)}
{pt3dadd(197616.000000,133416.000000,76725.000000,21.985675)}
{pt3dadd(197520.000000,133680.000000,76525.000000,10.784398)}
{pt3dadd(197484.000000,133800.000000,76450.000000,10.784398)}
{pt3dadd(197448.000000,134076.000000,76075.000000,10.784398)}
{pt3dadd(197496.000000,134400.000000,75975.000000,17.140230)}
{pt3dadd(197316.000000,134688.000000,76075.000000,7.855832)}
{pt3dadd(197352.000000,134928.000000,76000.000000,7.855832)}
{pt3dadd(197388.000000,135216.000000,75925.000000,7.855832)}
{pt3dadd(197424.000000,135492.000000,75925.000000,15.542830)}
{pt3dadd(197424.000000,135780.000000,75825.000000,9.186998)}
{pt3dadd(197568.000000,136056.000000,75750.000000,9.186998)}
{pt3dadd(197496.000000,136320.000000,75625.000000,9.186998)}
{pt3dadd(197532.000000,136572.000000,75675.000000,16.873996)}
{pt3dadd(197616.000000,136824.000000,75500.000000,9.186998)}
{pt3dadd(197472.000000,137112.000000,75325.000000,9.186998)}
{pt3dadd(197844.000000,137424.000000,75300.000000,9.186998)}
{pt3dadd(197844.000000,137748.000000,75350.000000,18.088020)}
{pt3dadd(197820.000000,138012.000000,74975.000000,10.401022)}
{pt3dadd(197820.000000,138264.000000,74900.000000,10.401022)}
{pt3dadd(197892.000000,138516.000000,74825.000000,10.401022)}
{pt3dadd(197796.000000,138744.000000,74750.000000,18.088020)}
{pt3dadd(197664.000000,139020.000000,74650.000000,9.186998)}
{pt3dadd(197568.000000,139308.000000,74500.000000,9.186998)}
{pt3dadd(197580.000000,139560.000000,74475.000000,9.186998)}
{pt3dadd(197556.000000,139776.000000,74450.000000,16.873996)}
{pt3dadd(197532.000000,140028.000000,74425.000000,18.471396)}
{pt3dadd(197472.000000,140316.000000,74425.000000,29.785660)}
{pt3dadd(197364.000000,140724.000000,74100.000000,47.921990)}

{create adhoc10}
{access adhoc10}
{connect adhoc10(1), adhoc9(0)}
{nseg = 1}
{strdef color color = "White"}
{pt3dclear()}
{pt3dadd(197364.000000,140724.000000,74100.000000,47.921990)}
{pt3dadd(196992.000000,140472.000000,71975.000000,24.177506)}
{pt3dadd(196920.000000,140208.000000,71975.000000,15.106503)}
{pt3dadd(196800.000000,139980.000000,71925.000000,10.144211)}
{pt3dadd(196680.000000,139668.000000,71675.000000,5.822105)}
{pt3dadd(196644.000000,139392.000000,71625.000000,5.822105)}
{pt3dadd(196596.000000,139092.000000,71250.000000,5.822105)}
{pt3dadd(196548.000000,138816.000000,71250.000000,10.144211)}
{pt3dadd(196428.000000,138540.000000,71125.000000,5.822105)}
{pt3dadd(196308.000000,138276.000000,70775.000000,5.822105)}
{pt3dadd(196008.000000,138024.000000,70625.000000,5.822105)}
{pt3dadd(195792.000000,137796.000000,70500.000000,11.068632)}
{pt3dadd(195672.000000,137580.000000,70000.000000,6.746526)}
{pt3dadd(195660.000000,137364.000000,69950.000000,6.746526)}
{pt3dadd(195696.000000,137136.000000,69950.000000,6.746526)}
{pt3dadd(195444.000000,136908.000000,69625.000000,11.068632)}
{pt3dadd(195396.000000,136668.000000,69500.000000,5.822105)}
{pt3dadd(195312.000000,136476.000000,69300.000000,5.822105)}
{pt3dadd(195048.000000,136284.000000,69000.000000,5.822105)}
{pt3dadd(194796.000000,136080.000000,68700.000000,10.144211)}
{pt3dadd(194820.000000,135852.000000,68425.000000,5.822105)}
{pt3dadd(194448.000000,135840.000000,68075.000000,5.822105)}
{pt3dadd(193932.000000,135540.000000,67700.000000,5.822105)}
{pt3dadd(193680.000000,135420.000000,67400.000000,9.373860)}
{pt3dadd(193452.000000,135420.000000,66975.000000,5.051754)}
{pt3dadd(193200.000000,135228.000000,67150.000000,5.051754)}
{pt3dadd(192996.000000,135108.000000,67325.000000,5.051754)}
{pt3dadd(192792.000000,134892.000000,67325.000000,7.426584)}
{pt3dadd(192612.000000,134712.000000,67150.000000,3.874829)}
{pt3dadd(192420.000000,134532.000000,67225.000000,3.874829)}
{pt3dadd(192216.000000,134460.000000,67250.000000,3.874829)}
{pt3dadd(192012.000000,134412.000000,67275.000000,6.249659)}
{pt3dadd(191796.000000,134304.000000,67250.000000,3.874829)}
{pt3dadd(191592.000000,134196.000000,67225.000000,3.874829)}
{pt3dadd(191364.000000,134016.000000,67175.000000,3.874829)}
{pt3dadd(191160.000000,133836.000000,67125.000000,6.249659)}
{pt3dadd(190980.000000,133656.000000,67075.000000,3.874829)}
{pt3dadd(190800.000000,133500.000000,67200.000000,3.874829)}
{pt3dadd(190572.000000,133248.000000,67075.000000,6.784625)}
{pt3dadd(190344.000000,133056.000000,67150.000000,10.182309)}
{pt3dadd(190140.000000,132936.000000,67050.000000,12.012466)}
{pt3dadd(189936.000000,132816.000000,67175.000000,18.488420)}

{create adhoc11}
{access adhoc11}
{connect adhoc11(1), adhoc10(0)}
{nseg = 1}
{strdef color color = "White"}
{pt3dclear()}
{pt3dadd(189936.000000,132816.000000,67175.000000,18.488420)}
{pt3dadd(189756.000000,132516.000000,66850.000000,11.120856)}
{pt3dadd(189540.000000,132216.000000,67000.000000,7.272513)}
{pt3dadd(189348.000000,131964.000000,67075.000000,6.249659)}
{pt3dadd(189228.000000,131688.000000,67125.000000,3.874829)}
{pt3dadd(189072.000000,131460.000000,67025.000000,3.874829)}
{pt3dadd(189000.000000,131220.000000,66875.000000,3.874829)}
{pt3dadd(189072.000000,130980.000000,66750.000000,5.432350)}
{pt3dadd(188988.000000,130728.000000,66850.000000,3.057520)}
{pt3dadd(188916.000000,130512.000000,66800.000000,3.057520)}
{pt3dadd(189120.000000,130236.000000,66575.000000,3.057520)}
{pt3dadd(189432.000000,129828.000000,66375.000000,6.609275)}
{pt3dadd(189504.000000,129744.000000,66125.000000,5.051754)}
{pt3dadd(189672.000000,129780.000000,66200.000000,5.051754)}
{pt3dadd(188940.000000,129996.000000,65850.000000,7.426584)}
{pt3dadd(188868.000000,129852.000000,65550.000000,8.984104)}
{pt3dadd(188892.000000,129984.000000,65325.000000,8.053916)}
{pt3dadd(188844.000000,130092.000000,65125.000000,9.287602)}

{create adhoc12}
{access adhoc12}
{connect adhoc12(1), adhoc10(0)}
{nseg = 1}
{strdef color color = "White"}
{pt3dclear()}
{pt3dadd(189936.000000,132816.000000,67175.000000,18.488420)}
{pt3dadd(189744.000000,132996.000000,67850.000000,9.758674)}
{pt3dadd(189492.000000,133068.000000,67900.000000,6.455204)}
{pt3dadd(189348.000000,133092.000000,68025.000000,4.305454)}
{pt3dadd(189108.000000,133200.000000,67925.000000,2.747934)}
{pt3dadd(188916.000000,133188.000000,67875.000000,2.747934)}
{pt3dadd(188652.000000,133260.000000,68050.000000,2.747934)}
{pt3dadd(188292.000000,133464.000000,68050.000000,3.686281)}
{pt3dadd(188088.000000,133452.000000,68100.000000,2.438347)}
{pt3dadd(187812.000000,133236.000000,68225.000000,3.624363)}
{pt3dadd(187536.000000,133056.000000,68325.000000,4.872297)}
{pt3dadd(187248.000000,133236.000000,68325.000000,5.556584)}
{pt3dadd(187056.000000,133224.000000,68400.000000,7.739669)}

{create adhoc13}
{access adhoc13}
{connect adhoc13(1), adhoc9(0)}
{nseg = 1}
{strdef color color = "White"}
{pt3dclear()}
{pt3dadd(197364.000000,140724.000000,74100.000000,47.921990)}
{pt3dadd(197412.000000,140976.000000,74050.000000,35.642792)}
{pt3dadd(197460.000000,141180.000000,73925.000000,21.985675)}
{pt3dadd(197508.000000,141408.000000,73800.000000,21.985675)}
{pt3dadd(197556.000000,141636.000000,73675.000000,10.784398)}
{pt3dadd(197604.000000,141864.000000,73550.000000,10.784398)}
{pt3dadd(197652.000000,142080.000000,73425.000000,10.784398)}
{pt3dadd(197340.000000,142320.000000,73375.000000,20.068796)}
{pt3dadd(197208.000000,142596.000000,73250.000000,10.784398)}
{pt3dadd(197100.000000,142872.000000,73225.000000,10.784398)}
{pt3dadd(196968.000000,143088.000000,73275.000000,10.784398)}
{pt3dadd(196836.000000,143364.000000,73325.000000,18.471396)}
{pt3dadd(196884.000000,143604.000000,73050.000000,9.186998)}
{pt3dadd(196932.000000,143844.000000,73100.000000,9.186998)}
{pt3dadd(196956.000000,144096.000000,72925.000000,9.186998)}
{pt3dadd(197076.000000,144384.000000,73125.000000,18.471396)}
{pt3dadd(197064.000000,144636.000000,73075.000000,10.784398)}
{pt3dadd(197052.000000,144972.000000,73025.000000,10.784398)}
{pt3dadd(197040.000000,145236.000000,72975.000000,10.784398)}
{pt3dadd(197028.000000,145572.000000,72925.000000,21.525624)}
{pt3dadd(197016.000000,145860.000000,72850.000000,12.241226)}
{pt3dadd(197004.000000,146160.000000,72775.000000,12.241226)}
{pt3dadd(196992.000000,146472.000000,72700.000000,12.241226)}
{pt3dadd(196932.000000,146736.000000,72600.000000,21.525624)}
{pt3dadd(197028.000000,147000.000000,72625.000000,10.784398)}
{pt3dadd(197052.000000,147300.000000,72600.000000,10.784398)}
{pt3dadd(197076.000000,147624.000000,72500.000000,10.784398)}
{pt3dadd(197148.000000,147912.000000,72550.000000,18.471396)}
{pt3dadd(197040.000000,148212.000000,72400.000000,9.186998)}
{pt3dadd(197004.000000,148536.000000,72350.000000,9.186998)}
{pt3dadd(197172.000000,148848.000000,72625.000000,9.186998)}
{pt3dadd(196932.000000,149124.000000,72625.000000,16.873996)}
{pt3dadd(196980.000000,149388.000000,72925.000000,9.186998)}
{pt3dadd(196920.000000,149664.000000,73100.000000,9.186998)}
{pt3dadd(196968.000000,149928.000000,72900.000000,9.186998)}
{pt3dadd(197064.000000,150204.000000,73050.000000,18.471396)}
{pt3dadd(197160.000000,150468.000000,72975.000000,10.784398)}
{pt3dadd(197256.000000,150684.000000,72900.000000,10.784398)}
{pt3dadd(197352.000000,150936.000000,72825.000000,10.784398)}
{pt3dadd(197172.000000,151176.000000,72975.000000,20.068796)}
{pt3dadd(197400.000000,151428.000000,73050.000000,10.784398)}
{pt3dadd(197316.000000,151644.000000,72975.000000,10.784398)}
{pt3dadd(197232.000000,151908.000000,72900.000000,10.784398)}
{pt3dadd(197148.000000,152100.000000,72825.000000,21.985675)}
{pt3dadd(197064.000000,152340.000000,72750.000000,23.442503)}
{pt3dadd(197004.000000,152676.000000,72575.000000,32.726901)}
{pt3dadd(196944.000000,152952.000000,72650.000000,53.544834)}
{pt3dadd(196788.000000,153348.000000,72350.000000,47.921990)}

{create adhoc14}
{access adhoc14}
{connect adhoc14(1), adhoc13(0)}
{nseg = 1}
{strdef color color = "White"}
{pt3dclear()}
{pt3dadd(196788.000000,153348.000000,72350.000000,47.921990)}
{pt3dadd(197520.000000,153564.000000,76225.000000,25.718207)}
{pt3dadd(197196.000000,153900.000000,76825.000000,16.030924)}
{pt3dadd(197076.000000,154164.000000,77350.000000,11.068632)}
{pt3dadd(196980.000000,154392.000000,77700.000000,5.822105)}
{pt3dadd(196836.000000,154596.000000,77800.000000,5.822105)}
{pt3dadd(196668.000000,154860.000000,78025.000000,5.822105)}
{pt3dadd(196776.000000,155088.000000,78225.000000,10.144211)}
{pt3dadd(196656.000000,155316.000000,78350.000000,5.822105)}
{pt3dadd(196680.000000,155532.000000,78800.000000,5.822105)}
{pt3dadd(196656.000000,155724.000000,78925.000000,5.822105)}
{pt3dadd(196632.000000,155916.000000,79100.000000,8.731901)}
{pt3dadd(196608.000000,156108.000000,79275.000000,4.409795)}
{pt3dadd(196788.000000,156324.000000,79475.000000,4.409795)}
{pt3dadd(196800.000000,156492.000000,79550.000000,4.409795)}
{pt3dadd(196812.000000,156660.000000,79625.000000,7.319591)}
{pt3dadd(196836.000000,156852.000000,79725.000000,4.409795)}
{pt3dadd(196860.000000,157032.000000,79825.000000,4.409795)}
{pt3dadd(196884.000000,157224.000000,79925.000000,4.409795)}
{pt3dadd(196956.000000,157416.000000,80025.000000,7.961550)}
{pt3dadd(197028.000000,157572.000000,80125.000000,5.051754)}
{pt3dadd(197148.000000,157764.000000,80400.000000,5.051754)}
{pt3dadd(197256.000000,157932.000000,80450.000000,5.051754)}
{pt3dadd(197520.000000,158112.000000,80800.000000,11.407586)}
{pt3dadd(197700.000000,158280.000000,81000.000000,7.855832)}
{pt3dadd(197844.000000,158328.000000,81100.000000,7.855832)}
{pt3dadd(198024.000000,158340.000000,81925.000000,7.855832)}
{pt3dadd(198228.000000,158232.000000,82700.000000,10.230661)}
{pt3dadd(198252.000000,157992.000000,82875.000000,3.874829)}
{pt3dadd(198240.000000,157740.000000,83000.000000,3.874829)}
{pt3dadd(198276.000000,157572.000000,82925.000000,3.874829)}
{pt3dadd(198672.000000,157416.000000,83075.000000,5.122763)}
{pt3dadd(198744.000000,157140.000000,83000.000000,2.747934)}
{pt3dadd(198744.000000,156912.000000,82950.000000,2.747934)}
{pt3dadd(198792.000000,156720.000000,82900.000000,2.747934)}
{pt3dadd(198804.000000,156540.000000,82800.000000,4.676958)}
{pt3dadd(198792.000000,156348.000000,82750.000000,3.429025)}
{pt3dadd(198756.000000,156168.000000,82775.000000,3.429025)}
{pt3dadd(198732.000000,155988.000000,82800.000000,3.429025)}
{pt3dadd(198708.000000,155808.000000,82825.000000,4.986545)}
{pt3dadd(198684.000000,155628.000000,82850.000000,3.057520)}
{pt3dadd(198660.000000,155484.000000,82875.000000,3.057520)}
{pt3dadd(198564.000000,155316.000000,82725.000000,3.057520)}
{pt3dadd(198552.000000,155160.000000,82775.000000,5.432350)}
{pt3dadd(198540.000000,154992.000000,82825.000000,3.874829)}
{pt3dadd(198528.000000,154800.000000,82875.000000,3.874829)}
{pt3dadd(198552.000000,154620.000000,82875.000000,3.874829)}
{pt3dadd(198516.000000,154452.000000,82775.000000,6.249659)}
{pt3dadd(198516.000000,154284.000000,82775.000000,3.874829)}
{pt3dadd(198588.000000,154104.000000,82875.000000,3.874829)}
{pt3dadd(198732.000000,153948.000000,82875.000000,3.874829)}
{pt3dadd(198852.000000,153780.000000,82900.000000,5.432350)}
{pt3dadd(198972.000000,153612.000000,82875.000000,4.047465)}
{pt3dadd(199008.000000,153432.000000,82675.000000,5.604986)}
{pt3dadd(199080.000000,153276.000000,82650.000000,8.341643)}
{pt3dadd(199212.000000,153000.000000,82625.000000,9.287602)}

{create adhoc15}
{access adhoc15}
{connect adhoc15(1), adhoc13(0)}
{nseg = 1}
{strdef color color = "White"}
{pt3dclear()}
{pt3dadd(196788.000000,153348.000000,72350.000000,47.921990)}
{pt3dadd(196812.000000,153612.000000,72275.000000,32.447993)}
{pt3dadd(196860.000000,153804.000000,72075.000000,20.068796)}
{pt3dadd(196752.000000,154044.000000,71975.000000,20.068796)}
{pt3dadd(196716.000000,154260.000000,72050.000000,10.784398)}
{pt3dadd(196764.000000,154524.000000,72000.000000,10.784398)}
{pt3dadd(196884.000000,154812.000000,71875.000000,10.784398)}
{pt3dadd(196932.000000,155016.000000,71875.000000,20.068796)}
{pt3dadd(196980.000000,155256.000000,71875.000000,10.784398)}
{pt3dadd(197028.000000,155484.000000,71875.000000,10.784398)}
{pt3dadd(197076.000000,155700.000000,71875.000000,10.784398)}
{pt3dadd(197124.000000,155964.000000,71875.000000,20.068796)}
{pt3dadd(196992.000000,156228.000000,71875.000000,10.784398)}
{pt3dadd(196836.000000,156528.000000,72075.000000,10.784398)}
{pt3dadd(196908.000000,156816.000000,71900.000000,10.784398)}
{pt3dadd(196980.000000,157056.000000,71725.000000,21.985675)}
{pt3dadd(197028.000000,157344.000000,71625.000000,12.701277)}
{pt3dadd(196920.000000,157584.000000,71550.000000,12.701277)}
{pt3dadd(196836.000000,157884.000000,71525.000000,12.701277)}
{pt3dadd(197004.000000,158220.000000,71450.000000,21.985675)}
{pt3dadd(196944.000000,158532.000000,71525.000000,10.784398)}
{pt3dadd(196968.000000,158832.000000,71500.000000,10.784398)}
{pt3dadd(196992.000000,159096.000000,71400.000000,10.784398)}
{pt3dadd(197016.000000,159396.000000,71550.000000,21.985675)}
{pt3dadd(197112.000000,159624.000000,71350.000000,12.701277)}
{pt3dadd(197208.000000,159900.000000,71250.000000,12.701277)}
{pt3dadd(197076.000000,160260.000000,71200.000000,12.701277)}
{pt3dadd(196992.000000,160560.000000,71125.000000,23.902554)}
{pt3dadd(196860.000000,160836.000000,71175.000000,12.701277)}
{pt3dadd(196572.000000,161124.000000,70900.000000,28.300642)}
{pt3dadd(196536.000000,161520.000000,70525.000000,41.802174)}
{pt3dadd(195708.000000,161832.000000,69350.000000,50.001495)}
{pt3dadd(195696.000000,162096.000000,69350.000000,69.007660)}

{create adhoc16}
{access adhoc16}
{connect adhoc16(1), adhoc15(0)}
{nseg = 1}
{strdef color color = "White"}
{pt3dclear()}
{pt3dadd(195696.000000,162096.000000,69350.000000,69.007660)}
{pt3dadd(194532.000000,162312.000000,66350.000000,32.376996)}
{pt3dadd(194412.000000,162648.000000,65825.000000,20.026197)}
{pt3dadd(193860.000000,163236.000000,65275.000000,11.771192)}
{pt3dadd(193572.000000,163752.000000,64700.000000,6.746526)}
{pt3dadd(193200.000000,164340.000000,64250.000000,6.746526)}
{pt3dadd(193224.000000,164616.000000,64175.000000,6.746526)}
{pt3dadd(192972.000000,164856.000000,63850.000000,11.993053)}
{pt3dadd(192516.000000,165120.000000,63925.000000,6.746526)}
{pt3dadd(192108.000000,165420.000000,63850.000000,6.746526)}
{pt3dadd(191880.000000,165636.000000,63725.000000,6.746526)}
{pt3dadd(191724.000000,165936.000000,63675.000000,12.836125)}
{pt3dadd(191772.000000,166188.000000,63400.000000,7.589598)}
{pt3dadd(191412.000000,166452.000000,62875.000000,7.589598)}
{pt3dadd(191136.000000,166740.000000,62650.000000,7.589598)}
{pt3dadd(191100.000000,167016.000000,62575.000000,15.276596)}
{pt3dadd(190896.000000,167316.000000,62450.000000,9.186998)}
{pt3dadd(190668.000000,167604.000000,62000.000000,9.186998)}
{pt3dadd(190560.000000,167880.000000,61925.000000,9.186998)}
{pt3dadd(190308.000000,168156.000000,61675.000000,14.433524)}
{pt3dadd(189996.000000,168408.000000,61475.000000,6.746526)}
{pt3dadd(189660.000000,168672.000000,61275.000000,6.746526)}
{pt3dadd(189456.000000,168864.000000,61050.000000,6.746526)}
{pt3dadd(189168.000000,169056.000000,61025.000000,10.298281)}
{pt3dadd(188916.000000,169176.000000,60875.000000,5.051754)}
{pt3dadd(188652.000000,169476.000000,60725.000000,5.051754)}
{pt3dadd(188400.000000,169668.000000,60650.000000,5.051754)}
{pt3dadd(188160.000000,169836.000000,60625.000000,7.961550)}
{pt3dadd(187932.000000,170100.000000,60525.000000,4.409795)}
{pt3dadd(187692.000000,170400.000000,60500.000000,4.409795)}
{pt3dadd(187440.000000,170676.000000,60200.000000,4.409795)}
{pt3dadd(187164.000000,171000.000000,60175.000000,8.731901)}
{pt3dadd(186936.000000,171048.000000,60125.000000,5.822105)}
{pt3dadd(186684.000000,171516.000000,59675.000000,5.822105)}
{pt3dadd(186576.000000,171660.000000,59400.000000,5.822105)}
{pt3dadd(186240.000000,171984.000000,59100.000000,12.177937)}
{pt3dadd(185928.000000,172224.000000,58775.000000,7.855832)}
{pt3dadd(185592.000000,172620.000000,58400.000000,7.855832)}
{pt3dadd(185364.000000,172668.000000,57950.000000,7.855832)}
{pt3dadd(185184.000000,172884.000000,57625.000000,13.102358)}
{pt3dadd(185088.000000,172932.000000,57300.000000,6.746526)}
{pt3dadd(185052.000000,172956.000000,56900.000000,6.746526)}
{pt3dadd(185016.000000,173172.000000,56600.000000,6.746526)}
{pt3dadd(185016.000000,173244.000000,56325.000000,9.121356)}
{pt3dadd(184980.000000,173460.000000,56050.000000,3.874829)}
{pt3dadd(184704.000000,173736.000000,55800.000000,3.874829)}
{pt3dadd(183972.000000,174012.000000,55450.000000,3.874829)}
{pt3dadd(183768.000000,174108.000000,55275.000000,5.432350)}
{pt3dadd(183204.000000,174000.000000,55000.000000,3.057520)}
{pt3dadd(182724.000000,174144.000000,54775.000000,3.057520)}
{pt3dadd(182052.000000,174528.000000,54600.000000,3.057520)}
{pt3dadd(181788.000000,174780.000000,54425.000000,4.986545)}
{pt3dadd(181644.000000,175032.000000,54175.000000,3.429025)}
{pt3dadd(181440.000000,175008.000000,53900.000000,3.429025)}
{pt3dadd(181128.000000,175368.000000,53575.000000,3.429025)}
{pt3dadd(180900.000000,175524.000000,53375.000000,4.986545)}
{pt3dadd(180768.000000,175752.000000,53125.000000,3.057520)}
{pt3dadd(180528.000000,175932.000000,53200.000000,3.057520)}
{pt3dadd(180324.000000,176076.000000,53200.000000,3.057520)}
{pt3dadd(180120.000000,176208.000000,53200.000000,4.986545)}
{pt3dadd(180096.000000,176340.000000,53200.000000,3.429025)}
{pt3dadd(179880.000000,176496.000000,53125.000000,3.429025)}
{pt3dadd(179580.000000,176496.000000,52950.000000,3.429025)}
{pt3dadd(178668.000000,177192.000000,52750.000000,4.986545)}
{pt3dadd(178200.000000,177696.000000,52550.000000,3.057520)}
{pt3dadd(177756.000000,177888.000000,52350.000000,3.057520)}
{pt3dadd(177612.000000,178044.000000,52325.000000,3.057520)}
{pt3dadd(177456.000000,178212.000000,52175.000000,4.047465)}
{pt3dadd(177456.000000,178704.000000,52050.000000,2.489945)}
{pt3dadd(177540.000000,179364.000000,51775.000000,2.489945)}
{pt3dadd(177396.000000,179700.000000,51525.000000,2.489945)}
{pt3dadd(177336.000000,179904.000000,51450.000000,4.047465)}
{pt3dadd(177300.000000,180036.000000,51525.000000,3.057520)}
{pt3dadd(177336.000000,180192.000000,51450.000000,3.057520)}
{pt3dadd(177168.000000,180396.000000,51500.000000,3.057520)}
{pt3dadd(177108.000000,180792.000000,51275.000000,5.432350)}
{pt3dadd(177192.000000,180900.000000,51250.000000,3.874829)}
{pt3dadd(177240.000000,181008.000000,51150.000000,3.874829)}
{pt3dadd(177288.000000,181176.000000,51225.000000,3.874829)}
{pt3dadd(177324.000000,181284.000000,51175.000000,4.649783)}
{pt3dadd(177456.000000,181464.000000,51200.000000,2.274954)}
{pt3dadd(177624.000000,181644.000000,51225.000000,2.274954)}
{pt3dadd(177804.000000,181824.000000,51250.000000,2.274954)}
{pt3dadd(177936.000000,181896.000000,51200.000000,3.264899)}
{pt3dadd(178092.000000,181968.000000,51150.000000,3.085740)}
{pt3dadd(177996.000000,182124.000000,51100.000000,3.532236)}
{pt3dadd(177996.000000,182364.000000,50975.000000,4.887060)}
{pt3dadd(178068.000000,182604.000000,51000.000000,3.732480)}

{create adhoc17}
{access adhoc17}
{connect adhoc17(1), adhoc15(0)}
{nseg = 1}
{strdef color color = "White"}
{pt3dclear()}
{pt3dadd(195696.000000,162096.000000,69350.000000,69.007660)}
{pt3dadd(196308.000000,162276.000000,70350.000000,51.105617)}
{pt3dadd(196536.000000,162552.000000,70575.000000,31.263370)}
{pt3dadd(196560.000000,162816.000000,70775.000000,31.263370)}
{pt3dadd(196344.000000,163116.000000,70625.000000,15.001532)}
{pt3dadd(196416.000000,163380.000000,70925.000000,15.001532)}
{pt3dadd(196380.000000,163644.000000,70950.000000,15.001532)}
{pt3dadd(196452.000000,163944.000000,71100.000000,28.503064)}
{pt3dadd(196416.000000,164280.000000,71200.000000,15.001532)}
{pt3dadd(196380.000000,164520.000000,71325.000000,15.001532)}
{pt3dadd(196272.000000,164784.000000,71350.000000,15.001532)}
{pt3dadd(196260.000000,165156.000000,71350.000000,28.503064)}
{pt3dadd(196428.000000,165420.000000,71575.000000,15.001532)}
{pt3dadd(196344.000000,165696.000000,71600.000000,15.001532)}
{pt3dadd(196188.000000,165960.000000,71600.000000,15.001532)}
{pt3dadd(196260.000000,166224.000000,71775.000000,26.202809)}
{pt3dadd(196080.000000,166488.000000,72175.000000,26.202809)}
{pt3dadd(196068.000000,166764.000000,72275.000000,42.671349)}
{pt3dadd(196092.000000,167040.000000,72750.000000,69.007660)}

{create adhoc18}
{access adhoc18}
{connect adhoc18(1), adhoc17(0)}
{nseg = 1}
{strdef color color = "White"}
{pt3dclear()}
{pt3dadd(196092.000000,167040.000000,72750.000000,69.007660)}
{pt3dadd(196356.000000,166860.000000,75075.000000,29.922144)}
{pt3dadd(196488.000000,166692.000000,75150.000000,18.553286)}
{pt3dadd(196524.000000,166464.000000,75550.000000,8.603509)}
{pt3dadd(196404.000000,166212.000000,75700.000000,5.051754)}
{pt3dadd(196584.000000,165876.000000,75950.000000,5.051754)}
{pt3dadd(196596.000000,165624.000000,76150.000000,5.051754)}
{pt3dadd(196500.000000,165360.000000,76325.000000,9.373860)}
{pt3dadd(196560.000000,165108.000000,76850.000000,5.822105)}
{pt3dadd(196620.000000,164856.000000,77300.000000,5.822105)}
{pt3dadd(196956.000000,165012.000000,77675.000000,5.822105)}
{pt3dadd(197472.000000,164904.000000,78150.000000,13.189623)}
{pt3dadd(197760.000000,164868.000000,78600.000000,8.867518)}
{pt3dadd(197940.000000,165048.000000,79025.000000,8.867518)}
{pt3dadd(198048.000000,165036.000000,79475.000000,8.867518)}
{pt3dadd(198156.000000,165168.000000,79900.000000,16.554516)}
{pt3dadd(198156.000000,165192.000000,80250.000000,9.186998)}
{pt3dadd(198216.000000,165216.000000,80600.000000,9.186998)}
{pt3dadd(198024.000000,165492.000000,80925.000000,9.186998)}
{pt3dadd(197760.000000,165648.000000,81225.000000,12.738752)}
{pt3dadd(197484.000000,165864.000000,81500.000000,5.051754)}
{pt3dadd(197304.000000,166140.000000,81800.000000,5.051754)}
{pt3dadd(197148.000000,166140.000000,82075.000000,5.051754)}
{pt3dadd(197136.000000,166236.000000,82350.000000,10.298281)}
{pt3dadd(196944.000000,166320.000000,82625.000000,13.102358)}
{pt3dadd(196788.000000,166200.000000,82925.000000,16.654113)}
{pt3dadd(196632.000000,166080.000000,83200.000000,26.756855)}
{pt3dadd(196620.000000,166032.000000,83550.000000,19.258772)}

{create adhoc19}
{access adhoc19}
{connect adhoc19(1), adhoc18(0)}
{nseg = 1}
{strdef color color = "White"}
{pt3dclear()}
{pt3dadd(196620.000000,166032.000000,83550.000000,19.258772)}
{pt3dadd(196272.000000,165372.000000,83825.000000,13.339181)}
{pt3dadd(196308.000000,164820.000000,84200.000000,8.603509)}
{pt3dadd(196392.000000,164640.000000,84475.000000,6.980779)}
{pt3dadd(196452.000000,164388.000000,84700.000000,3.429025)}
{pt3dadd(196500.000000,163968.000000,84950.000000,3.429025)}
{pt3dadd(197064.000000,164748.000000,85250.000000,3.429025)}
{pt3dadd(197268.000000,164844.000000,85500.000000,4.986545)}
{pt3dadd(197304.000000,165012.000000,85750.000000,4.986545)}
{pt3dadd(197520.000000,165132.000000,85950.000000,6.544065)}
{pt3dadd(197580.000000,165228.000000,86175.000000,9.906776)}
{pt3dadd(197676.000000,165252.000000,86400.000000,9.287602)}

{create adhoc20}
{access adhoc20}
{connect adhoc20(1), adhoc18(0)}
{nseg = 1}
{strdef color color = "White"}
{pt3dclear()}
{pt3dadd(196620.000000,166032.000000,83550.000000,19.258772)}
{pt3dadd(197172.000000,166296.000000,83900.000000,11.377640)}
{pt3dadd(197352.000000,166416.000000,84225.000000,7.426584)}
{pt3dadd(197448.000000,166644.000000,84450.000000,5.432350)}
{pt3dadd(197592.000000,166980.000000,84825.000000,3.057520)}
{pt3dadd(197676.000000,167196.000000,84900.000000,3.057520)}
{pt3dadd(197568.000000,167376.000000,84900.000000,3.057520)}
{pt3dadd(197436.000000,167568.000000,85000.000000,4.305454)}
{pt3dadd(197448.000000,167772.000000,85100.000000,4.587797)}
{pt3dadd(197364.000000,167892.000000,85125.000000,5.362751)}
{pt3dadd(197220.000000,168084.000000,85250.000000,7.937919)}
{pt3dadd(196980.000000,168588.000000,85525.000000,5.374770)}

{create adhoc21}
{access adhoc21}
{connect adhoc21(1), adhoc17(0)}
{nseg = 1}
{strdef color color = "White"}
{pt3dclear()}
{pt3dadd(196092.000000,167040.000000,72750.000000,69.007660)}
{pt3dadd(196140.000000,167304.000000,72775.000000,46.505107)}
{pt3dadd(196236.000000,167592.000000,72775.000000,28.503064)}
{pt3dadd(196332.000000,167844.000000,72775.000000,27.951002)}
{pt3dadd(196428.000000,168120.000000,72775.000000,14.449470)}
{pt3dadd(196524.000000,168336.000000,72775.000000,14.449470)}
{pt3dadd(196620.000000,168576.000000,72775.000000,14.449470)}
{pt3dadd(196716.000000,168828.000000,72775.000000,27.951002)}
{pt3dadd(196812.000000,169116.000000,72775.000000,15.001532)}
{pt3dadd(196704.000000,169356.000000,72675.000000,15.001532)}
{pt3dadd(196596.000000,169644.000000,72575.000000,15.001532)}
{pt3dadd(196488.000000,170004.000000,72475.000000,28.503064)}
{pt3dadd(196656.000000,170232.000000,72600.000000,15.001532)}
{pt3dadd(196824.000000,170484.000000,72725.000000,15.001532)}
{pt3dadd(196920.000000,170712.000000,72800.000000,15.001532)}
{pt3dadd(196908.000000,171000.000000,72800.000000,28.503064)}
{pt3dadd(196776.000000,171216.000000,72950.000000,15.001532)}
{pt3dadd(196644.000000,171444.000000,73125.000000,15.001532)}
{pt3dadd(196836.000000,171684.000000,73125.000000,15.001532)}
{pt3dadd(196824.000000,171924.000000,73150.000000,26.202809)}
{pt3dadd(196896.000000,172128.000000,73200.000000,12.701277)}
{pt3dadd(196968.000000,172380.000000,73100.000000,23.902554)}
{pt3dadd(197016.000000,172644.000000,73200.000000,35.103832)}
{pt3dadd(197136.000000,172908.000000,73375.000000,38.837591)}
{pt3dadd(197484.000000,173232.000000,73425.000000,57.506386)}

{create adhoc22}
{access adhoc22}
{connect adhoc22(1), adhoc21(0)}
{nseg = 1}
{strdef color color = "White"}
{pt3dclear()}
{pt3dadd(197484.000000,173232.000000,73425.000000,57.506386)}
{pt3dadd(197496.000000,173148.000000,76100.000000,25.018454)}
{pt3dadd(197328.000000,172968.000000,76350.000000,15.611073)}
{pt3dadd(197028.000000,172812.000000,76700.000000,7.319591)}
{pt3dadd(197280.000000,172644.000000,76900.000000,4.409795)}
{pt3dadd(197460.000000,172260.000000,77150.000000,4.409795)}
{pt3dadd(197460.000000,171900.000000,77525.000000,4.409795)}
{pt3dadd(197520.000000,171768.000000,77900.000000,10.765627)}
{pt3dadd(197556.000000,171504.000000,78300.000000,9.413352)}
{pt3dadd(197580.000000,171264.000000,78650.000000,14.688921)}
{pt3dadd(197244.000000,170496.000000,78875.000000,9.287602)}

{create adhoc23}
{access adhoc23}
{connect adhoc23(1), adhoc22(0)}
{nseg = 1}
{strdef color color = "White"}
{pt3dclear()}
{pt3dadd(197244.000000,170496.000000,78875.000000,9.287602)}
{pt3dadd(197532.000000,171108.000000,79075.000000,12.840078)}
{pt3dadd(197436.000000,171252.000000,79275.000000,8.304047)}
{pt3dadd(197172.000000,171336.000000,79525.000000,11.068632)}
{pt3dadd(196596.000000,171300.000000,79800.000000,5.822105)}
{pt3dadd(196380.000000,171552.000000,80125.000000,5.822105)}
{pt3dadd(196188.000000,171732.000000,80475.000000,5.822105)}
{pt3dadd(195912.000000,171732.000000,80750.000000,7.379626)}
{pt3dadd(195612.000000,171948.000000,81050.000000,3.057520)}
{pt3dadd(195444.000000,172152.000000,81200.000000,3.057520)}
{pt3dadd(195336.000000,172536.000000,81475.000000,3.057520)}
{pt3dadd(195120.000000,172716.000000,81625.000000,4.615041)}
{pt3dadd(195096.000000,172956.000000,81700.000000,3.057520)}
{pt3dadd(195036.000000,173196.000000,81800.000000,3.057520)}
{pt3dadd(195096.000000,173424.000000,81775.000000,3.057520)}
{pt3dadd(194832.000000,173592.000000,81775.000000,5.432350)}
{pt3dadd(194640.000000,173856.000000,81800.000000,3.874829)}
{pt3dadd(194484.000000,174132.000000,81750.000000,3.874829)}
{pt3dadd(194436.000000,174456.000000,81750.000000,3.874829)}
{pt3dadd(194340.000000,174720.000000,81600.000000,5.122763)}
{pt3dadd(194208.000000,174960.000000,81575.000000,2.747934)}
{pt3dadd(194208.000000,175068.000000,81650.000000,2.747934)}
{pt3dadd(194052.000000,175116.000000,81675.000000,2.747934)}
{pt3dadd(193872.000000,175212.000000,81600.000000,3.737879)}
{pt3dadd(193752.000000,175296.000000,81550.000000,2.489945)}
{pt3dadd(193608.000000,175416.000000,81500.000000,2.489945)}
{pt3dadd(193572.000000,175572.000000,81450.000000,2.489945)}
{pt3dadd(193572.000000,175740.000000,81475.000000,6.041699)}
{pt3dadd(193656.000000,175908.000000,81400.000000,5.051754)}
{pt3dadd(193620.000000,176052.000000,81525.000000,5.051754)}
{pt3dadd(193656.000000,176196.000000,81475.000000,5.051754)}
{pt3dadd(193836.000000,176352.000000,81450.000000,6.299688)}
{pt3dadd(194004.000000,176496.000000,81450.000000,2.747934)}
{pt3dadd(194232.000000,176628.000000,81500.000000,2.747934)}
{pt3dadd(194472.000000,176772.000000,81525.000000,2.747934)}
{pt3dadd(194544.000000,176916.000000,81550.000000,4.305454)}
{pt3dadd(194484.000000,177036.000000,81625.000000,3.832474)}
{pt3dadd(194376.000000,177180.000000,81625.000000,4.822419)}
{pt3dadd(194292.000000,177324.000000,81675.000000,7.037365)}
{pt3dadd(194124.000000,177456.000000,81700.000000,6.449724)}

{create adhoc24}
{access adhoc24}
{connect adhoc24(1), adhoc22(0)}
{nseg = 1}
{strdef color color = "White"}
{pt3dclear()}
{pt3dadd(197244.000000,170496.000000,78875.000000,9.287602)}
{pt3dadd(197196.000000,169920.000000,79050.000000,8.798076)}
{pt3dadd(197244.000000,169752.000000,79150.000000,3.732480)}

{create adhoc25}
{access adhoc25}
{connect adhoc25(1), adhoc21(0)}
{nseg = 1}
{strdef color color = "White"}
{pt3dclear()}
{pt3dadd(197484.000000,173232.000000,73425.000000,57.506386)}
{pt3dadd(197556.000000,173496.000000,73575.000000,38.837591)}
{pt3dadd(197688.000000,173712.000000,73675.000000,23.902554)}
{pt3dadd(197604.000000,173940.000000,73950.000000,26.202809)}
{pt3dadd(197592.000000,174132.000000,74075.000000,15.001532)}
{pt3dadd(197580.000000,174312.000000,74200.000000,15.001532)}
{pt3dadd(197568.000000,174528.000000,74325.000000,15.001532)}
{pt3dadd(197532.000000,174744.000000,74375.000000,31.263370)}
{pt3dadd(197496.000000,174948.000000,74325.000000,17.761838)}
{pt3dadd(197460.000000,175188.000000,74275.000000,17.761838)}
{pt3dadd(197424.000000,175404.000000,74400.000000,17.761838)}
{pt3dadd(197412.000000,175632.000000,74650.000000,31.263370)}
{pt3dadd(197400.000000,175884.000000,74900.000000,15.001532)}
{pt3dadd(197364.000000,176088.000000,74875.000000,15.001532)}
{pt3dadd(197328.000000,176340.000000,74850.000000,15.001532)}
{pt3dadd(197316.000000,176568.000000,74775.000000,28.503064)}
{pt3dadd(197100.000000,176832.000000,74950.000000,15.001532)}
{pt3dadd(196764.000000,177096.000000,74850.000000,15.001532)}
{pt3dadd(196524.000000,177384.000000,75150.000000,15.001532)}
{pt3dadd(196440.000000,177672.000000,75125.000000,28.503064)}
{pt3dadd(196356.000000,177876.000000,75100.000000,15.001532)}
{pt3dadd(196272.000000,178128.000000,75075.000000,15.001532)}
{pt3dadd(196188.000000,178356.000000,75025.000000,15.001532)}
{pt3dadd(196212.000000,178548.000000,75150.000000,28.503064)}
{pt3dadd(195828.000000,178776.000000,75125.000000,15.001532)}
{pt3dadd(195852.000000,178992.000000,75075.000000,15.001532)}
{pt3dadd(195876.000000,179208.000000,75025.000000,15.001532)}
{pt3dadd(195840.000000,179412.000000,75075.000000,28.503064)}
{pt3dadd(195804.000000,179640.000000,75125.000000,15.001532)}
{pt3dadd(195768.000000,179880.000000,75175.000000,15.001532)}
{pt3dadd(195732.000000,180096.000000,75225.000000,15.001532)}
{pt3dadd(195696.000000,180312.000000,75275.000000,28.503064)}
{pt3dadd(195480.000000,180576.000000,75350.000000,15.001532)}
{pt3dadd(195324.000000,180816.000000,75600.000000,15.001532)}
{pt3dadd(195108.000000,181080.000000,75575.000000,15.001532)}
{pt3dadd(195024.000000,181332.000000,75550.000000,26.202809)}
{pt3dadd(194664.000000,181536.000000,75675.000000,12.701277)}
{pt3dadd(194304.000000,181728.000000,75800.000000,12.701277)}
{pt3dadd(194220.000000,181932.000000,75950.000000,12.701277)}
{pt3dadd(194040.000000,182172.000000,75750.000000,26.202809)}
{pt3dadd(193620.000000,182400.000000,75825.000000,15.001532)}
{pt3dadd(193440.000000,182628.000000,75900.000000,15.001532)}
{pt3dadd(193308.000000,182832.000000,75800.000000,15.001532)}
{pt3dadd(193176.000000,183036.000000,75650.000000,31.263370)}
{pt3dadd(193020.000000,183252.000000,75750.000000,17.761838)}
{pt3dadd(192864.000000,183480.000000,75850.000000,17.761838)}
{pt3dadd(192888.000000,183708.000000,75700.000000,17.761838)}
{pt3dadd(192936.000000,183900.000000,75625.000000,30.711308)}
{pt3dadd(192852.000000,184092.000000,75400.000000,14.449470)}
{pt3dadd(192696.000000,184356.000000,75450.000000,14.449470)}
{pt3dadd(192516.000000,184536.000000,75500.000000,14.449470)}
{pt3dadd(192336.000000,184800.000000,75575.000000,27.951002)}
{pt3dadd(192072.000000,185040.000000,75525.000000,15.001532)}
{pt3dadd(191808.000000,185280.000000,75475.000000,15.001532)}
{pt3dadd(191544.000000,185472.000000,75425.000000,15.001532)}
{pt3dadd(191280.000000,185712.000000,75375.000000,28.503064)}
{pt3dadd(191016.000000,185916.000000,75325.000000,15.001532)}
{pt3dadd(190752.000000,186144.000000,75275.000000,15.001532)}
{pt3dadd(190488.000000,186384.000000,75200.000000,15.001532)}
{pt3dadd(190512.000000,186612.000000,75200.000000,28.503064)}
{pt3dadd(190224.000000,186864.000000,74975.000000,15.001532)}
{pt3dadd(189936.000000,187116.000000,74750.000000,15.001532)}
{pt3dadd(189924.000000,187344.000000,74700.000000,15.001532)}
{pt3dadd(189912.000000,187548.000000,74500.000000,28.503064)}
{pt3dadd(189804.000000,187776.000000,74475.000000,15.001532)}
{pt3dadd(189768.000000,187992.000000,74150.000000,15.001532)}
{pt3dadd(189816.000000,188220.000000,74000.000000,15.001532)}
{pt3dadd(189756.000000,188460.000000,74000.000000,30.600897)}
{pt3dadd(189696.000000,188700.000000,74025.000000,17.099365)}
{pt3dadd(189636.000000,188952.000000,74050.000000,17.099365)}
{pt3dadd(189576.000000,189192.000000,74075.000000,17.099365)}
{pt3dadd(189432.000000,189408.000000,74150.000000,32.698730)}
{pt3dadd(189372.000000,189636.000000,74300.000000,17.099365)}
{pt3dadd(189216.000000,189864.000000,74400.000000,17.099365)}
{pt3dadd(189060.000000,190116.000000,74475.000000,17.099365)}
{pt3dadd(188952.000000,190404.000000,74475.000000,33.361203)}
{pt3dadd(188868.000000,190644.000000,74475.000000,17.761838)}
{pt3dadd(188784.000000,190872.000000,74475.000000,17.761838)}
{pt3dadd(188700.000000,191124.000000,74475.000000,17.761838)}
{pt3dadd(188616.000000,191376.000000,74575.000000,34.023676)}
{pt3dadd(188688.000000,191640.000000,74700.000000,17.761838)}
{pt3dadd(188628.000000,191880.000000,74650.000000,17.761838)}
{pt3dadd(188472.000000,192144.000000,74725.000000,17.761838)}
{pt3dadd(188460.000000,192408.000000,75175.000000,34.023676)}
{pt3dadd(188424.000000,192672.000000,75150.000000,17.761838)}
{pt3dadd(188292.000000,192912.000000,75100.000000,17.761838)}
{pt3dadd(188184.000000,193140.000000,75275.000000,17.761838)}
{pt3dadd(188004.000000,193368.000000,75325.000000,34.023676)}
{pt3dadd(188040.000000,193620.000000,75450.000000,17.761838)}
{pt3dadd(187956.000000,193848.000000,75750.000000,17.761838)}
{pt3dadd(187776.000000,194124.000000,75850.000000,17.761838)}
{pt3dadd(187596.000000,194400.000000,75950.000000,34.023676)}
{pt3dadd(187356.000000,194616.000000,76000.000000,17.761838)}
{pt3dadd(187248.000000,194868.000000,76050.000000,17.761838)}
{pt3dadd(187140.000000,195120.000000,76100.000000,17.761838)}
{pt3dadd(186780.000000,195336.000000,76150.000000,34.023676)}
{pt3dadd(186744.000000,195564.000000,76550.000000,17.761838)}
{pt3dadd(186636.000000,195780.000000,76475.000000,17.761838)}
{pt3dadd(186660.000000,196020.000000,76625.000000,17.761838)}
{pt3dadd(186684.000000,196236.000000,76775.000000,34.023676)}
{pt3dadd(186624.000000,196500.000000,76825.000000,17.761838)}
{pt3dadd(186564.000000,196728.000000,76875.000000,17.761838)}
{pt3dadd(186504.000000,196968.000000,76925.000000,17.761838)}
{pt3dadd(186444.000000,197172.000000,76975.000000,31.263370)}
{pt3dadd(186360.000000,197388.000000,77025.000000,15.001532)}
{pt3dadd(186324.000000,197604.000000,77350.000000,15.001532)}
{pt3dadd(186312.000000,197856.000000,77075.000000,15.001532)}
{pt3dadd(186312.000000,198132.000000,77400.000000,31.263370)}
{pt3dadd(186312.000000,198408.000000,77750.000000,17.761838)}
{pt3dadd(186312.000000,198684.000000,78125.000000,17.761838)}
{pt3dadd(186300.000000,198960.000000,78525.000000,17.761838)}
{pt3dadd(186384.000000,199308.000000,78900.000000,27.046236)}
{pt3dadd(186300.000000,199584.000000,79275.000000,10.784398)}
{pt3dadd(186180.000000,199776.000000,79675.000000,10.784398)}
{pt3dadd(186264.000000,200148.000000,80075.000000,10.784398)}
{pt3dadd(186180.000000,200700.000000,80500.000000,21.985675)}
{pt3dadd(186120.000000,201000.000000,80900.000000,12.701277)}
{pt3dadd(186096.000000,201168.000000,81300.000000,12.701277)}
{pt3dadd(185868.000000,202056.000000,81700.000000,12.701277)}
{pt3dadd(185688.000000,202944.000000,82025.000000,26.202809)}
{pt3dadd(185532.000000,202992.000000,82300.000000,15.001532)}
{pt3dadd(185376.000000,203040.000000,82550.000000,15.001532)}
{pt3dadd(185544.000000,203028.000000,82875.000000,15.001532)}
{pt3dadd(185772.000000,202848.000000,83250.000000,24.285930)}
{pt3dadd(186000.000000,202668.000000,83600.000000,10.784398)}
{pt3dadd(186108.000000,202824.000000,83925.000000,10.784398)}
{pt3dadd(186288.000000,202680.000000,84300.000000,10.784398)}
{pt3dadd(186612.000000,202536.000000,84625.000000,20.068796)}
{pt3dadd(186876.000000,202512.000000,84925.000000,10.784398)}
{pt3dadd(187020.000000,202308.000000,85225.000000,10.784398)}
{pt3dadd(187092.000000,202572.000000,85550.000000,10.784398)}
{pt3dadd(187512.000000,202752.000000,85825.000000,20.068796)}
{pt3dadd(187836.000000,202728.000000,86100.000000,10.784398)}
{pt3dadd(188028.000000,202872.000000,86450.000000,10.784398)}
{pt3dadd(188148.000000,202956.000000,86725.000000,10.784398)}
{pt3dadd(188784.000000,202776.000000,87025.000000,21.525623)}
{pt3dadd(188976.000000,203004.000000,87350.000000,12.241225)}
{pt3dadd(189168.000000,202980.000000,87625.000000,12.241225)}
{pt3dadd(189360.000000,202956.000000,87950.000000,12.241225)}
{pt3dadd(189504.000000,202860.000000,88300.000000,28.503063)}
{pt3dadd(189720.000000,203340.000000,88550.000000,17.761838)}
{pt3dadd(189792.000000,203244.000000,88825.000000,17.761838)}
{pt3dadd(189864.000000,203148.000000,89150.000000,17.761838)}
{pt3dadd(189972.000000,203160.000000,89450.000000,34.023676)}
{pt3dadd(190044.000000,203232.000000,89775.000000,17.761838)}
{pt3dadd(190116.000000,203304.000000,90075.000000,17.761838)}
{pt3dadd(189936.000000,203112.000000,90375.000000,17.761838)}
{pt3dadd(190164.000000,203076.000000,90700.000000,34.023676)}
{pt3dadd(190320.000000,203076.000000,91025.000000,17.761838)}
{pt3dadd(190356.000000,202896.000000,91350.000000,17.761838)}
{pt3dadd(190584.000000,202692.000000,91675.000000,17.761838)}
{pt3dadd(190524.000000,202596.000000,92025.000000,34.023676)}
{pt3dadd(190380.000000,202536.000000,92400.000000,17.761838)}
{pt3dadd(190668.000000,202392.000000,92750.000000,17.761838)}
{pt3dadd(190956.000000,202248.000000,93100.000000,17.761838)}
{pt3dadd(191028.000000,202188.000000,93400.000000,34.023676)}
{pt3dadd(191280.000000,202152.000000,93750.000000,17.761838)}
{pt3dadd(191436.000000,202308.000000,94050.000000,17.761838)}
{pt3dadd(191760.000000,202380.000000,94300.000000,17.761838)}
{pt3dadd(191832.000000,202356.000000,94650.000000,41.310884)}
{pt3dadd(191916.000000,202704.000000,95025.000000,25.049046)}
{pt3dadd(191640.000000,202920.000000,95425.000000,25.049046)}
{pt3dadd(191676.000000,203064.000000,95850.000000,25.049046)}
{pt3dadd(191724.000000,203208.000000,96300.000000,48.598092)}
{pt3dadd(191544.000000,203556.000000,96700.000000,25.049046)}
{pt3dadd(191544.000000,203736.000000,97150.000000,25.049046)}
{pt3dadd(191544.000000,203916.000000,97550.000000,25.049046)}
{pt3dadd(191472.000000,203892.000000,97950.000000,48.598092)}
{pt3dadd(191400.000000,203868.000000,98325.000000,25.049046)}
{pt3dadd(191328.000000,203868.000000,98700.000000,25.049046)}
{pt3dadd(191256.000000,203868.000000,99150.000000,25.049046)}
{pt3dadd(190944.000000,203916.000000,99600.000000,41.310884)}
{pt3dadd(190800.000000,204024.000000,100000.000000,17.761838)}
{pt3dadd(190668.000000,204000.000000,100500.000000,17.761838)}
{pt3dadd(190428.000000,204180.000000,100800.000000,17.761838)}
{pt3dadd(190140.000000,204072.000000,101175.000000,28.963115)}
{pt3dadd(190080.000000,204036.000000,101550.000000,12.701277)}
{pt3dadd(190044.000000,204216.000000,101925.000000,12.701277)}
{pt3dadd(189804.000000,204000.000000,102275.000000,12.701277)}
{pt3dadd(189492.000000,204288.000000,102750.000000,32.275482)}
{pt3dadd(189396.000000,204516.000000,103225.000000,21.074205)}
{pt3dadd(189624.000000,204408.000000,103675.000000,21.074205)}
{pt3dadd(189492.000000,204408.000000,104200.000000,21.074205)}
{pt3dadd(189384.000000,204300.000000,104700.000000,37.336043)}
{pt3dadd(189396.000000,204300.000000,105150.000000,17.761838)}
{pt3dadd(189372.000000,204480.000000,105625.000000,17.761838)}
{pt3dadd(189312.000000,204732.000000,106050.000000,17.761838)}
{pt3dadd(189168.000000,204588.000000,106550.000000,34.023676)}
{pt3dadd(189024.000000,204420.000000,106975.000000,17.761838)}
{pt3dadd(188892.000000,204396.000000,107450.000000,17.761838)}
{pt3dadd(188712.000000,204504.000000,107900.000000,17.761838)}
{pt3dadd(188604.000000,204096.000000,108300.000000,28.963115)}
{pt3dadd(188532.000000,203928.000000,108775.000000,12.701277)}
{pt3dadd(188328.000000,203892.000000,109225.000000,12.701277)}
{pt3dadd(188112.000000,203724.000000,109600.000000,12.701277)}
{pt3dadd(187896.000000,203556.000000,110025.000000,23.902554)}
{pt3dadd(187488.000000,203424.000000,110475.000000,12.701277)}
{pt3dadd(187368.000000,203244.000000,110900.000000,12.701277)}
{pt3dadd(187116.000000,202884.000000,111475.000000,12.701277)}
{pt3dadd(186684.000000,202644.000000,111975.000000,23.902554)}
{pt3dadd(186192.000000,202356.000000,112450.000000,12.701277)}
{pt3dadd(185856.000000,202212.000000,112850.000000,12.701277)}
{pt3dadd(185400.000000,202008.000000,113325.000000,12.701277)}
{pt3dadd(185040.000000,201744.000000,113800.000000,25.120770)}
{pt3dadd(184932.000000,201804.000000,114150.000000,13.919493)}
{pt3dadd(184668.000000,201588.000000,114575.000000,13.919493)}
{pt3dadd(184404.000000,201528.000000,115075.000000,13.919493)}
{pt3dadd(183804.000000,201348.000000,115450.000000,26.338984)}
{pt3dadd(183516.000000,201192.000000,115800.000000,13.919491)}
{pt3dadd(183276.000000,201036.000000,116175.000000,13.919491)}
{pt3dadd(183060.000000,200784.000000,116525.000000,13.919491)}
{pt3dadd(182844.000000,200604.000000,116875.000000,25.120768)}
{pt3dadd(182868.000000,200544.000000,117150.000000,12.701277)}
{pt3dadd(182736.000000,200292.000000,117575.000000,12.701277)}
{pt3dadd(181992.000000,199824.000000,118125.000000,12.701277)}
{pt3dadd(181680.000000,199644.000000,118675.000000,20.388275)}
{pt3dadd(181008.000000,199356.000000,119150.000000,9.186998)}
{pt3dadd(181200.000000,198972.000000,119550.000000,9.186998)}
{pt3dadd(179868.000000,198372.000000,120075.000000,9.186998)}
{pt3dadd(180036.000000,198156.000000,120550.000000,16.873996)}
{pt3dadd(179208.000000,196896.000000,120975.000000,9.186998)}
{pt3dadd(178968.000000,196740.000000,121375.000000,9.186998)}
{pt3dadd(178704.000000,196524.000000,121550.000000,9.186998)}
{pt3dadd(178464.000000,196392.000000,121675.000000,16.554517)}
{pt3dadd(178224.000000,196128.000000,121900.000000,8.867519)}
{pt3dadd(177960.000000,195972.000000,122100.000000,8.867519)}
{pt3dadd(177732.000000,195636.000000,122375.000000,8.867519)}
{pt3dadd(177468.000000,195300.000000,122525.000000,16.554517)}
{pt3dadd(177240.000000,194880.000000,122825.000000,9.186998)}
{pt3dadd(176988.000000,194568.000000,122800.000000,9.186998)}
{pt3dadd(176712.000000,194388.000000,123150.000000,9.186998)}
{pt3dadd(176448.000000,194208.000000,123500.000000,16.873996)}
{pt3dadd(176196.000000,194100.000000,123525.000000,9.186998)}
{pt3dadd(175956.000000,193764.000000,123800.000000,9.186998)}
{pt3dadd(175728.000000,193140.000000,123950.000000,9.186998)}
{pt3dadd(175500.000000,192828.000000,123975.000000,16.873996)}
{pt3dadd(175296.000000,192612.000000,124175.000000,9.186998)}
{pt3dadd(175068.000000,192396.000000,124375.000000,9.186998)}
{pt3dadd(174828.000000,191904.000000,124600.000000,9.186998)}
{pt3dadd(174600.000000,191544.000000,124800.000000,15.542830)}
{pt3dadd(174324.000000,191208.000000,124800.000000,7.855832)}
{pt3dadd(174120.000000,190848.000000,124800.000000,7.855832)}
{pt3dadd(173832.000000,190512.000000,125150.000000,7.855832)}
{pt3dadd(173592.000000,190044.000000,125350.000000,14.211664)}
{pt3dadd(173352.000000,189528.000000,125525.000000,7.855832)}
{pt3dadd(173112.000000,189012.000000,125700.000000,7.855832)}
{pt3dadd(172812.000000,188724.000000,125750.000000,7.855832)}
{pt3dadd(172524.000000,188484.000000,126025.000000,14.211664)}
{pt3dadd(172224.000000,188220.000000,126250.000000,7.855832)}
{pt3dadd(171924.000000,187908.000000,126325.000000,7.855832)}
{pt3dadd(171648.000000,187596.000000,126400.000000,7.855832)}
{pt3dadd(171408.000000,187416.000000,126575.000000,14.211664)}
{pt3dadd(171156.000000,187200.000000,126750.000000,7.855832)}
{pt3dadd(170904.000000,186936.000000,126925.000000,7.855832)}
{pt3dadd(170700.000000,186624.000000,127075.000000,7.855832)}
{pt3dadd(170412.000000,186240.000000,127150.000000,15.542830)}
{pt3dadd(170124.000000,185820.000000,126875.000000,9.186998)}
{pt3dadd(169836.000000,185532.000000,127250.000000,9.186998)}
{pt3dadd(169536.000000,185220.000000,127225.000000,9.186998)}
{pt3dadd(169284.000000,184908.000000,127250.000000,16.873996)}
{pt3dadd(168984.000000,184596.000000,127250.000000,9.186998)}
{pt3dadd(168792.000000,184416.000000,127300.000000,9.186998)}
{pt3dadd(168552.000000,184440.000000,127500.000000,9.186998)}
{pt3dadd(168300.000000,184512.000000,127625.000000,18.088020)}
{pt3dadd(167988.000000,184296.000000,127700.000000,10.401022)}
{pt3dadd(167664.000000,183780.000000,128000.000000,10.401022)}
{pt3dadd(167352.000000,183492.000000,128075.000000,10.401022)}
{pt3dadd(167076.000000,183156.000000,128275.000000,16.756854)}
{pt3dadd(166788.000000,182484.000000,127950.000000,7.855832)}
{pt3dadd(166536.000000,182352.000000,128350.000000,7.855832)}
{pt3dadd(166296.000000,182292.000000,128700.000000,7.855832)}
{pt3dadd(165996.000000,181896.000000,128975.000000,14.211664)}
{pt3dadd(165756.000000,181296.000000,129225.000000,7.855832)}
{pt3dadd(165540.000000,181212.000000,129350.000000,7.855832)}
{pt3dadd(165312.000000,180588.000000,129475.000000,7.855832)}
{pt3dadd(165072.000000,180144.000000,129450.000000,13.102358)}
{pt3dadd(164856.000000,180036.000000,129600.000000,6.746526)}
{pt3dadd(164604.000000,179796.000000,129875.000000,6.746526)}
{pt3dadd(164364.000000,179664.000000,129825.000000,6.746526)}
{pt3dadd(164172.000000,179304.000000,129975.000000,13.102358)}
{pt3dadd(163920.000000,178884.000000,130450.000000,7.855832)}
{pt3dadd(163680.000000,178500.000000,130400.000000,7.855832)}
{pt3dadd(163080.000000,177828.000000,130775.000000,7.855832)}
{pt3dadd(162588.000000,177540.000000,131100.000000,17.140230)}
{pt3dadd(162144.000000,177096.000000,131400.000000,10.784398)}
{pt3dadd(161676.000000,176556.000000,131775.000000,10.784398)}
{pt3dadd(161184.000000,176220.000000,132125.000000,10.784398)}
{pt3dadd(160764.000000,175680.000000,132475.000000,21.985675)}
{pt3dadd(160344.000000,175260.000000,132875.000000,12.701277)}
{pt3dadd(160536.000000,174816.000000,133250.000000,12.701277)}
{pt3dadd(160056.000000,174276.000000,133650.000000,12.701277)}
{pt3dadd(160092.000000,173988.000000,134000.000000,21.985675)}
{pt3dadd(159876.000000,173496.000000,134300.000000,10.784398)}
{pt3dadd(159636.000000,172848.000000,134675.000000,10.784398)}
{pt3dadd(159252.000000,172200.000000,135050.000000,10.784398)}
{pt3dadd(158892.000000,171936.000000,135425.000000,19.685420)}
{pt3dadd(158676.000000,171324.000000,135800.000000,10.401022)}
{pt3dadd(158004.000000,170880.000000,136200.000000,10.401022)}
{pt3dadd(157560.000000,170544.000000,136625.000000,10.401022)}
{pt3dadd(157068.000000,169872.000000,137025.000000,21.602299)}
{pt3dadd(156600.000000,169632.000000,137375.000000,12.701277)}
{pt3dadd(156540.000000,169392.000000,137775.000000,12.701277)}
{pt3dadd(156792.000000,169104.000000,138175.000000,12.701277)}
{pt3dadd(156756.000000,168720.000000,138600.000000,23.902554)}
{pt3dadd(156852.000000,168336.000000,139000.000000,12.701277)}
{pt3dadd(156744.000000,168096.000000,139400.000000,12.701277)}
{pt3dadd(156456.000000,167856.000000,139825.000000,12.701277)}
{pt3dadd(156300.000000,167556.000000,140150.000000,21.985675)}
{pt3dadd(155808.000000,167628.000000,140450.000000,10.784398)}
{pt3dadd(155628.000000,167736.000000,140875.000000,10.784398)}
{pt3dadd(155388.000000,167520.000000,141200.000000,10.784398)}
{pt3dadd(155148.000000,166980.000000,141625.000000,18.471396)}
{pt3dadd(154908.000000,166440.000000,142000.000000,9.186998)}
{pt3dadd(154776.000000,165924.000000,142425.000000,9.186998)}
{pt3dadd(154644.000000,165408.000000,142800.000000,9.186998)}
{pt3dadd(154440.000000,165192.000000,143225.000000,22.688530)}
{pt3dadd(154008.000000,163908.000000,143675.000000,15.001532)}
{pt3dadd(153624.000000,163212.000000,144075.000000,15.001532)}
{pt3dadd(153492.000000,162792.000000,144475.000000,15.001532)}
{pt3dadd(153408.000000,162708.000000,144825.000000,31.263370)}
{pt3dadd(153324.000000,162624.000000,145200.000000,17.761838)}
{pt3dadd(153372.000000,162360.000000,145600.000000,17.761838)}
{pt3dadd(153312.000000,162096.000000,146025.000000,17.761838)}
{pt3dadd(153252.000000,161832.000000,146400.000000,41.310884)}
{pt3dadd(153144.000000,161520.000000,146750.000000,25.049046)}
{pt3dadd(153516.000000,161184.000000,147025.000000,25.049046)}
{pt3dadd(153408.000000,160716.000000,147500.000000,25.049046)}
{pt3dadd(153336.000000,160476.000000,147875.000000,44.623251)}
{pt3dadd(153492.000000,160188.000000,148275.000000,21.074205)}
{pt3dadd(153660.000000,159912.000000,148650.000000,21.074205)}
{pt3dadd(153888.000000,159780.000000,149050.000000,21.074205)}
{pt3dadd(154008.000000,159312.000000,149425.000000,37.336043)}
{pt3dadd(154080.000000,159024.000000,149825.000000,17.761838)}
{pt3dadd(154164.000000,158784.000000,150175.000000,17.761838)}
{pt3dadd(154056.000000,158652.000000,150550.000000,17.761838)}
{pt3dadd(153960.000000,158568.000000,150950.000000,36.541074)}
{pt3dadd(153948.000000,158124.000000,151300.000000,20.279236)}
{pt3dadd(153864.000000,157272.000000,151750.000000,20.279236)}
{pt3dadd(153996.000000,156804.000000,152200.000000,20.279236)}
{pt3dadd(154116.000000,156516.000000,152650.000000,33.780768)}
{pt3dadd(154212.000000,156132.000000,153125.000000,15.001532)}
{pt3dadd(154200.000000,155868.000000,153650.000000,15.001532)}
{pt3dadd(154164.000000,155304.000000,153975.000000,15.001532)}
{pt3dadd(154260.000000,155088.000000,154350.000000,28.503064)}
{pt3dadd(154356.000000,154872.000000,154700.000000,15.001532)}
{pt3dadd(154440.000000,154452.000000,155000.000000,15.001532)}
{pt3dadd(154812.000000,153780.000000,155325.000000,15.001532)}
{pt3dadd(154932.000000,153720.000000,155675.000000,31.263370)}
{pt3dadd(155052.000000,153672.000000,156000.000000,17.761838)}
{pt3dadd(155628.000000,153660.000000,156400.000000,17.761838)}
{pt3dadd(156312.000000,153288.000000,156850.000000,17.761838)}
{pt3dadd(156684.000000,152964.000000,157250.000000,34.023676)}
{pt3dadd(157056.000000,152892.000000,157650.000000,17.761838)}
{pt3dadd(157584.000000,152580.000000,158050.000000,17.761838)}
{pt3dadd(157848.000000,152448.000000,158450.000000,17.761838)}
{pt3dadd(157896.000000,151848.000000,158775.000000,33.361202)}
{pt3dadd(157764.000000,151332.000000,159150.000000,17.099364)}
{pt3dadd(158040.000000,150972.000000,159525.000000,17.099364)}
{pt3dadd(158316.000000,150708.000000,159900.000000,17.099364)}
{pt3dadd(158052.000000,150192.000000,160225.000000,33.361202)}
{pt3dadd(158532.000000,149844.000000,160550.000000,17.761838)}
{pt3dadd(158868.000000,149580.000000,160850.000000,17.761838)}
{pt3dadd(159192.000000,149016.000000,161275.000000,17.761838)}
{pt3dadd(159420.000000,148548.000000,161675.000000,34.023676)}
{pt3dadd(159888.000000,148368.000000,162075.000000,17.761838)}
{pt3dadd(159828.000000,147804.000000,162525.000000,17.761838)}
{pt3dadd(160308.000000,147108.000000,162925.000000,17.761838)}
{pt3dadd(160452.000000,146664.000000,163400.000000,34.023676)}
{pt3dadd(160572.000000,146328.000000,163825.000000,17.761838)}
{pt3dadd(160668.000000,145728.000000,164225.000000,17.761838)}
{pt3dadd(160692.000000,145308.000000,164600.000000,17.761838)}
{pt3dadd(161064.000000,145044.000000,164950.000000,37.336043)}
{pt3dadd(161232.000000,144480.000000,165400.000000,21.074205)}
{pt3dadd(161712.000000,144060.000000,165850.000000,21.074205)}
{pt3dadd(161964.000000,143640.000000,166325.000000,21.074205)}
{pt3dadd(162060.000000,143352.000000,166675.000000,44.623251)}
{pt3dadd(162792.000000,142728.000000,167150.000000,25.049046)}
{pt3dadd(162912.000000,142572.000000,167575.000000,25.049046)}
{pt3dadd(163140.000000,142356.000000,168000.000000,24.949046)}
{pt3dadd(163212.000000,142140.000000,168550.000000,48.498092)}
{pt3dadd(163308.000000,141900.000000,169025.000000,24.949046)}
{pt3dadd(163440.000000,141732.000000,169450.000000,24.949046)}
{pt3dadd(163536.000000,141456.000000,169875.000000,24.949046)}
{pt3dadd(163596.000000,141108.000000,170225.000000,48.598092)}
{pt3dadd(163860.000000,140880.000000,170600.000000,25.049046)}
{pt3dadd(163836.000000,140652.000000,170900.000000,25.049046)}
{pt3dadd(163812.000000,140376.000000,171275.000000,25.049046)}
{pt3dadd(163920.000000,140052.000000,171600.000000,48.598092)}
{pt3dadd(164004.000000,139800.000000,172000.000000,25.049046)}
{pt3dadd(163956.000000,139428.000000,172400.000000,25.049046)}
{pt3dadd(164064.000000,138972.000000,172775.000000,25.049046)}
{pt3dadd(164076.000000,138696.000000,173225.000000,48.598092)}
{pt3dadd(164196.000000,138348.000000,173625.000000,25.049046)}
{pt3dadd(164304.000000,138204.000000,174150.000000,25.049046)}
{pt3dadd(163644.000000,137724.000000,174650.000000,25.049046)}
{pt3dadd(163500.000000,137496.000000,175125.000000,59.091672)}
{pt3dadd(163368.000000,137268.000000,175625.000000,35.542626)}
{pt3dadd(163620.000000,136920.000000,176125.000000,35.542626)}
{pt3dadd(163596.000000,136980.000000,176675.000000,35.542626)}
{pt3dadd(163548.000000,136788.000000,177150.000000,69.585252)}
{pt3dadd(163560.000000,136284.000000,177675.000000,35.542626)}
{pt3dadd(163596.000000,136188.000000,178175.000000,35.542626)}
{pt3dadd(163632.000000,135996.000000,178675.000000,35.542626)}
{pt3dadd(163644.000000,135720.000000,179250.000000,63.861482)}
{pt3dadd(163392.000000,135492.000000,179700.000000,29.818856)}
{pt3dadd(163500.000000,134940.000000,180125.000000,29.818856)}
{pt3dadd(163452.000000,134208.000000,180650.000000,29.818856)}
{pt3dadd(163320.000000,134040.000000,181200.000000,58.137712)}
{pt3dadd(163092.000000,133512.000000,181625.000000,29.818856)}
{pt3dadd(162948.000000,133320.000000,182075.000000,29.818856)}
{pt3dadd(162780.000000,132924.000000,182550.000000,29.818856)}
{pt3dadd(162756.000000,132756.000000,182800.000000,61.777206)}
{pt3dadd(162684.000000,132588.000000,183100.000000,33.458350)}
{pt3dadd(162792.000000,132348.000000,182950.000000,33.458350)}
{pt3dadd(162720.000000,132120.000000,182900.000000,33.458350)}
{pt3dadd(162648.000000,131904.000000,182900.000000,54.258460)}
{pt3dadd(162480.000000,131724.000000,182900.000000,35.801642)}
{pt3dadd(162336.000000,131496.000000,183025.000000,235.501642)}
{pt3dadd(162192.000000,131196.000000,183175.000000,391.502737)}
{pt3dadd(162048.000000,130920.000000,183325.000000,1000.000000)}
