# Supplementary material for: Full reconstruction of large lobula plate tangential cells in Drosophila from a 3D EM dataset
Source: PLoS One. 2018 Nov 28;13(11):e0207828. doi: 10.1371/journal.pone.0207828 (PMC6261601; doi:10.1371/journal.pone.0207828)
Supplement: S1 Dataset — (ZIP) [file pone.0207828.s001.zip › Diameter hoc/VS_VSL_preliminary/VS4_skels_ck.001_completed.hoc0003.hoc]

/* created with convertKnossosNmlToHoc.m */

{create adhoc1}
{access adhoc1}
{nseg = 1}
{strdef color color = "White"}
{pt3dclear()}
{pt3dadd(182076.000000,193344.000000,69850.000000,6.449724)}
{pt3dadd(182556.000000,193104.000000,69400.000000,6.364949)}
{pt3dadd(182604.000000,192768.000000,68975.000000,4.418969)}
{pt3dadd(182916.000000,192732.000000,68325.000000,6.980779)}
{pt3dadd(182820.000000,191712.000000,67550.000000,6.980779)}
{pt3dadd(182352.000000,192588.000000,67150.000000,9.355608)}
{pt3dadd(182268.000000,193248.000000,66500.000000,14.592681)}
{pt3dadd(182160.000000,194184.000000,66300.000000,13.374147)}

{create adhoc2}
{access adhoc2}
{connect adhoc2(1), adhoc1(0)}
{nseg = 1}
{strdef color color = "White"}
{pt3dclear()}
{pt3dadd(182160.000000,194184.000000,66300.000000,13.374147)}
{pt3dadd(181992.000000,194388.000000,65675.000000,10.307708)}
{pt3dadd(180864.000000,193464.000000,65000.000000,7.774570)}
{pt3dadd(179604.000000,191868.000000,64550.000000,7.774570)}
{pt3dadd(179004.000000,190680.000000,64525.000000,7.107957)}
{pt3dadd(179784.000000,189624.000000,64425.000000,13.374147)}

{create adhoc3}
{access adhoc3}
{connect adhoc3(1), adhoc1(0)}
{nseg = 1}
{strdef color color = "White"}
{pt3dclear()}
{pt3dadd(182160.000000,194184.000000,66300.000000,13.374147)}
{pt3dadd(182376.000000,195564.000000,66850.000000,13.374147)}

{create adhoc4}
{access adhoc4}
{connect adhoc4(1), adhoc3(0)}
{nseg = 1}
{strdef color color = "White"}
{pt3dclear()}
{pt3dadd(182376.000000,195564.000000,66850.000000,13.374147)}
{pt3dadd(180900.000000,195888.000000,67025.000000,10.133806)}
{pt3dadd(180768.000000,196044.000000,67650.000000,9.287602)}

{create adhoc5}
{access adhoc5}
{connect adhoc5(1), adhoc3(0)}
{nseg = 1}
{strdef color color = "White"}
{pt3dclear()}
{pt3dadd(182376.000000,195564.000000,66850.000000,13.374147)}
{pt3dadd(182880.000000,195972.000000,67550.000000,12.661558)}
{pt3dadd(183324.000000,196188.000000,68275.000000,10.571764)}
{pt3dadd(184008.000000,196956.000000,69300.000000,17.481333)}
{pt3dadd(183900.000000,197652.000000,70025.000000,20.932046)}
{pt3dadd(183240.000000,199104.000000,70175.000000,47.921990)}

{create adhoc6}
{access adhoc6}
{connect adhoc6(1), adhoc5(0)}
{nseg = 1}
{strdef color color = "White"}
{pt3dclear()}
{pt3dadd(183240.000000,199104.000000,70175.000000,47.921990)}
{pt3dadd(182964.000000,199404.000000,69850.000000,32.447993)}
{pt3dadd(182688.000000,199704.000000,69700.000000,31.270073)}
{pt3dadd(182412.000000,200004.000000,69475.000000,32.726901)}
{pt3dadd(181392.000000,200268.000000,68825.000000,38.070839)}
{pt3dadd(180888.000000,200472.000000,68575.000000,55.206130)}

{create adhoc7}
{access adhoc7}
{connect adhoc7(1), adhoc6(0)}
{nseg = 1}
{strdef color color = "White"}
{pt3dclear()}
{pt3dadd(180888.000000,200472.000000,68575.000000,55.206130)}
{pt3dadd(180600.000000,200232.000000,67975.000000,40.984493)}
{pt3dadd(180156.000000,200340.000000,67325.000000,25.190696)}
{pt3dadd(179712.000000,200436.000000,66900.000000,23.733868)}
{pt3dadd(179268.000000,200532.000000,66225.000000,20.068796)}
{pt3dadd(178644.000000,201648.000000,65600.000000,31.270073)}
{pt3dadd(178020.000000,202764.000000,65050.000000,51.116789)}
{pt3dadd(177396.000000,203880.000000,64600.000000,57.506386)}

{create adhoc8}
{access adhoc8}
{connect adhoc8(1), adhoc7(0)}
{nseg = 1}
{strdef color color = "White"}
{pt3dclear()}
{pt3dadd(177396.000000,203880.000000,64600.000000,57.506386)}
{pt3dadd(176508.000000,204732.000000,64025.000000,50.477829)}
{pt3dadd(176208.000000,204792.000000,63825.000000,46.005110)}

{create adhoc9}
{access adhoc9}
{connect adhoc9(1), adhoc8(0)}
{nseg = 1}
{strdef color color = "White"}
{pt3dclear()}
{pt3dadd(176208.000000,204792.000000,63825.000000,46.005110)}
{pt3dadd(175716.000000,205680.000000,63575.000000,38.337593)}

{create adhoc10}
{access adhoc10}
{connect adhoc10(1), adhoc9(0)}
{nseg = 1}
{strdef color color = "White"}
{pt3dclear()}
{pt3dadd(175716.000000,205680.000000,63575.000000,38.337593)}
{pt3dadd(174768.000000,207324.000000,63175.000000,25.832366)}
{pt3dadd(173856.000000,208848.000000,62800.000000,16.048977)}

{create adhoc11}
{access adhoc11}
{connect adhoc11(1), adhoc10(0)}
{nseg = 1}
{strdef color color = "White"}
{pt3dclear()}
{pt3dadd(173856.000000,208848.000000,62800.000000,16.048977)}
{pt3dadd(173208.000000,209676.000000,62600.000000,23.110527)}

{create adhoc12}
{access adhoc12}
{connect adhoc12(1), adhoc11(0)}
{nseg = 1}
{strdef color color = "White"}
{pt3dclear()}
{pt3dadd(173208.000000,209676.000000,62600.000000,23.110527)}
{pt3dadd(172152.000000,210288.000000,62125.000000,11.918550)}
{pt3dadd(170892.000000,210924.000000,62000.000000,7.751130)}
{pt3dadd(169548.000000,212232.000000,62325.000000,5.803854)}
{pt3dadd(168204.000000,213528.000000,62650.000000,3.874829)}
{pt3dadd(167832.000000,214368.000000,63175.000000,6.249659)}
{pt3dadd(168696.000000,215268.000000,63825.000000,8.624488)}
{pt3dadd(169020.000000,215568.000000,64325.000000,9.416098)}
{pt3dadd(169284.000000,215688.000000,64850.000000,13.374147)}

{create adhoc13}
{access adhoc13}
{connect adhoc13(1), adhoc11(0)}
{nseg = 1}
{strdef color color = "White"}
{pt3dclear()}
{pt3dadd(173208.000000,209676.000000,62600.000000,23.110527)}
{pt3dadd(173124.000000,210264.000000,63200.000000,14.623100)}
{pt3dadd(172812.000000,210480.000000,63925.000000,9.373860)}
{pt3dadd(172536.000000,210684.000000,64750.000000,6.609275)}
{pt3dadd(172152.000000,211020.000000,64575.000000,3.057520)}
{pt3dadd(171372.000000,211428.000000,65025.000000,3.057520)}
{pt3dadd(170664.000000,211668.000000,65400.000000,3.057520)}
{pt3dadd(170316.000000,212460.000000,65950.000000,3.832474)}
{pt3dadd(170592.000000,213192.000000,66475.000000,3.049908)}
{pt3dadd(170544.000000,213816.000000,66650.000000,4.083180)}
{pt3dadd(170484.000000,214680.000000,66400.000000,5.374770)}

{create adhoc14}
{access adhoc14}
{connect adhoc14(1), adhoc10(0)}
{nseg = 1}
{strdef color color = "White"}
{pt3dclear()}
{pt3dadd(173856.000000,208848.000000,62800.000000,16.048977)}
{pt3dadd(173508.000000,208200.000000,63275.000000,9.564700)}
{pt3dadd(172788.000000,208476.000000,63600.000000,14.025818)}
{pt3dadd(172056.000000,208740.000000,64175.000000,14.667777)}
{pt3dadd(172116.000000,208824.000000,64875.000000,20.231254)}
{pt3dadd(172296.000000,208584.000000,65500.000000,19.258772)}

{create adhoc15}
{access adhoc15}
{connect adhoc15(1), adhoc14(0)}
{nseg = 1}
{strdef color color = "White"}
{pt3dclear()}
{pt3dadd(172296.000000,208584.000000,65500.000000,19.258772)}
{pt3dadd(173040.000000,208272.000000,65775.000000,11.579370)}
{pt3dadd(173412.000000,207756.000000,65650.000000,7.309687)}
{pt3dadd(174156.000000,207840.000000,65775.000000,6.449724)}

{create adhoc16}
{access adhoc16}
{connect adhoc16(1), adhoc14(0)}
{nseg = 1}
{strdef color color = "White"}
{pt3dclear()}
{pt3dadd(172296.000000,208584.000000,65500.000000,19.258772)}
{pt3dadd(171864.000000,208860.000000,65850.000000,13.973507)}
{pt3dadd(171960.000000,208464.000000,66350.000000,9.287602)}

{create adhoc17}
{access adhoc17}
{connect adhoc17(1), adhoc16(0)}
{nseg = 1}
{strdef color color = "White"}
{pt3dclear()}
{pt3dadd(171960.000000,208464.000000,66350.000000,9.287602)}
{pt3dadd(171468.000000,208908.000000,66625.000000,8.341643)}
{pt3dadd(171432.000000,209292.000000,66900.000000,6.449724)}

{create adhoc18}
{access adhoc18}
{connect adhoc18(1), adhoc16(0)}
{nseg = 1}
{strdef color color = "White"}
{pt3dclear()}
{pt3dadd(171960.000000,208464.000000,66350.000000,9.287602)}
{pt3dadd(172464.000000,208128.000000,66750.000000,6.691735)}
{pt3dadd(172704.000000,208224.000000,67225.000000,5.389995)}
{pt3dadd(173760.000000,207480.000000,67000.000000,4.428269)}
{pt3dadd(173988.000000,207516.000000,66825.000000,3.784582)}
{pt3dadd(174480.000000,207204.000000,66600.000000,4.478975)}

{create adhoc19}
{access adhoc19}
{connect adhoc19(1), adhoc9(0)}
{nseg = 1}
{strdef color color = "White"}
{pt3dclear()}
{pt3dadd(175716.000000,205680.000000,63575.000000,38.337593)}
{pt3dadd(174852.000000,205596.000000,63575.000000,6.449724)}

{create adhoc20}
{access adhoc20}
{connect adhoc20(1), adhoc8(0)}
{nseg = 1}
{strdef color color = "White"}
{pt3dclear()}
{pt3dadd(176208.000000,204792.000000,63825.000000,46.005110)}
{pt3dadd(174900.000000,204576.000000,63750.000000,20.293086)}
{pt3dadd(174504.000000,204504.000000,64000.000000,15.150681)}
{pt3dadd(173808.000000,204792.000000,64200.000000,8.178683)}
{pt3dadd(173328.000000,205416.000000,64550.000000,8.673090)}
{pt3dadd(173352.000000,205632.000000,64750.000000,11.145123)}

{create adhoc21}
{access adhoc21}
{connect adhoc21(1), adhoc20(0)}
{nseg = 1}
{strdef color color = "White"}
{pt3dclear()}
{pt3dadd(173352.000000,205632.000000,64750.000000,11.145123)}
{pt3dadd(173616.000000,206028.000000,65225.000000,13.374147)}

{create adhoc22}
{access adhoc22}
{connect adhoc22(1), adhoc20(0)}
{nseg = 1}
{strdef color color = "White"}
{pt3dclear()}
{pt3dadd(173352.000000,205632.000000,64750.000000,11.145123)}
{pt3dadd(172908.000000,205944.000000,64800.000000,7.656539)}
{pt3dadd(172092.000000,206112.000000,65050.000000,7.037365)}
{pt3dadd(172332.000000,206100.000000,65575.000000,9.287602)}

{create adhoc23}
{access adhoc23}
{connect adhoc23(1), adhoc7(0)}
{nseg = 1}
{strdef color color = "White"}
{pt3dclear()}
{pt3dadd(177396.000000,203880.000000,64600.000000,57.506386)}
{pt3dadd(178008.000000,200880.000000,64250.000000,32.980459)}
{pt3dadd(177816.000000,200364.000000,63475.000000,31.990634)}
{pt3dadd(177264.000000,199920.000000,62525.000000,20.837264)}
{pt3dadd(176700.000000,199476.000000,62050.000000,33.279160)}

{create adhoc24}
{access adhoc24}
{connect adhoc24(1), adhoc23(0)}
{nseg = 1}
{strdef color color = "White"}
{pt3dclear()}
{pt3dadd(176700.000000,199476.000000,62050.000000,33.279160)}
{pt3dadd(176604.000000,198696.000000,61675.000000,31.430317)}
{pt3dadd(176544.000000,197916.000000,61325.000000,27.732632)}

{create adhoc25}
{access adhoc25}
{connect adhoc25(1), adhoc24(0)}
{nseg = 1}
{strdef color color = "White"}
{pt3dclear()}
{pt3dadd(176544.000000,197916.000000,61325.000000,27.732632)}
{pt3dadd(176640.000000,196032.000000,60900.000000,15.093870)}
{pt3dadd(177048.000000,194820.000000,60475.000000,12.566117)}
{pt3dadd(177420.000000,193860.000000,60100.000000,10.229386)}
{pt3dadd(178152.000000,192684.000000,59650.000000,11.199318)}
{pt3dadd(178092.000000,192768.000000,59525.000000,16.048977)}

{create adhoc26}
{access adhoc26}
{connect adhoc26(1), adhoc25(0)}
{nseg = 1}
{strdef color color = "White"}
{pt3dclear()}
{pt3dadd(178092.000000,192768.000000,59525.000000,16.048977)}
{pt3dadd(178644.000000,191688.000000,59175.000000,14.265757)}
{pt3dadd(178644.000000,190296.000000,58500.000000,13.374147)}
{pt3dadd(178632.000000,189468.000000,58250.000000,13.374147)}

{create adhoc27}
{access adhoc27}
{connect adhoc27(1), adhoc26(0)}
{nseg = 1}
{strdef color color = "White"}
{pt3dclear()}
{pt3dadd(178632.000000,189468.000000,58250.000000,13.374147)}
{pt3dadd(179292.000000,188664.000000,58300.000000,9.187847)}
{pt3dadd(179604.000000,188076.000000,58675.000000,6.449724)}

{create adhoc28}
{access adhoc28}
{connect adhoc28(1), adhoc26(0)}
{nseg = 1}
{strdef color color = "White"}
{pt3dclear()}
{pt3dadd(178632.000000,189468.000000,58250.000000,13.374147)}
{pt3dadd(178140.000000,188832.000000,57525.000000,9.416098)}
{pt3dadd(178452.000000,187908.000000,56900.000000,9.055113)}
{pt3dadd(178584.000000,186840.000000,56325.000000,6.175757)}
{pt3dadd(178308.000000,186312.000000,56250.000000,7.739669)}

{create adhoc29}
{access adhoc29}
{connect adhoc29(1), adhoc28(0)}
{nseg = 1}
{strdef color color = "White"}
{pt3dclear()}
{pt3dadd(178308.000000,186312.000000,56250.000000,7.739669)}
{pt3dadd(178416.000000,186936.000000,56025.000000,11.145123)}

{create adhoc30}
{access adhoc30}
{connect adhoc30(1), adhoc29(0)}
{nseg = 1}
{strdef color color = "White"}
{pt3dclear()}
{pt3dadd(178416.000000,186936.000000,56025.000000,11.145123)}
{pt3dadd(177444.000000,186852.000000,55825.000000,7.656539)}
{pt3dadd(176868.000000,186636.000000,55400.000000,6.521388)}
{pt3dadd(176148.000000,186552.000000,55000.000000,7.739669)}

{create adhoc31}
{access adhoc31}
{connect adhoc31(1), adhoc29(0)}
{nseg = 1}
{strdef color color = "White"}
{pt3dclear()}
{pt3dadd(178416.000000,186936.000000,56025.000000,11.145123)}
{pt3dadd(178872.000000,187152.000000,55825.000000,8.673090)}
{pt3dadd(178968.000000,186996.000000,55475.000000,7.957169)}
{pt3dadd(179232.000000,186900.000000,55075.000000,5.088859)}
{pt3dadd(179820.000000,186504.000000,55000.000000,4.478975)}

{create adhoc32}
{access adhoc32}
{connect adhoc32(1), adhoc28(0)}
{nseg = 1}
{strdef color color = "White"}
{pt3dclear()}
{pt3dadd(178308.000000,186312.000000,56250.000000,7.739669)}
{pt3dadd(178152.000000,185208.000000,56075.000000,6.175757)}
{pt3dadd(177480.000000,184488.000000,55750.000000,5.862975)}
{pt3dadd(177696.000000,183480.000000,55475.000000,5.862975)}
{pt3dadd(178044.000000,182856.000000,55150.000000,6.175757)}
{pt3dadd(178152.000000,182148.000000,54850.000000,7.739669)}

{create adhoc33}
{access adhoc33}
{connect adhoc33(1), adhoc25(0)}
{nseg = 1}
{strdef color color = "White"}
{pt3dclear()}
{pt3dadd(178092.000000,192768.000000,59525.000000,16.048977)}
{pt3dadd(177192.000000,193236.000000,59275.000000,15.157367)}
{pt3dadd(176808.000000,192900.000000,58950.000000,13.374147)}

{create adhoc34}
{access adhoc34}
{connect adhoc34(1), adhoc33(0)}
{nseg = 1}
{strdef color color = "White"}
{pt3dclear()}
{pt3dadd(176808.000000,192900.000000,58950.000000,13.374147)}
{pt3dadd(177000.000000,192804.000000,58650.000000,8.673090)}
{pt3dadd(176988.000000,192960.000000,58075.000000,5.803854)}
{pt3dadd(176640.000000,193140.000000,57025.000000,6.338820)}
{pt3dadd(175104.000000,193308.000000,56550.000000,4.409795)}
{pt3dadd(174432.000000,193512.000000,56200.000000,5.184749)}
{pt3dadd(173916.000000,193860.000000,55500.000000,6.432683)}
{pt3dadd(172944.000000,194268.000000,54925.000000,4.871480)}
{pt3dadd(172248.000000,194880.000000,54925.000000,7.739669)}

{create adhoc35}
{access adhoc35}
{connect adhoc35(1), adhoc33(0)}
{nseg = 1}
{strdef color color = "White"}
{pt3dclear()}
{pt3dadd(176808.000000,192900.000000,58950.000000,13.374147)}
{pt3dadd(175656.000000,192456.000000,58800.000000,11.145123)}

{create adhoc36}
{access adhoc36}
{connect adhoc36(1), adhoc24(0)}
{nseg = 1}
{strdef color color = "White"}
{pt3dclear()}
{pt3dadd(176544.000000,197916.000000,61325.000000,27.732632)}
{pt3dadd(176364.000000,199656.000000,61000.000000,14.202260)}
{pt3dadd(175572.000000,199500.000000,60375.000000,9.121356)}
{pt3dadd(174780.000000,199656.000000,59825.000000,7.426584)}
{pt3dadd(173988.000000,199812.000000,59175.000000,7.426584)}
{pt3dadd(173856.000000,199656.000000,58525.000000,11.377640)}
{pt3dadd(173532.000000,199848.000000,57825.000000,13.374147)}

{create adhoc37}
{access adhoc37}
{connect adhoc37(1), adhoc36(0)}
{nseg = 1}
{strdef color color = "White"}
{pt3dclear()}
{pt3dadd(173532.000000,199848.000000,57825.000000,13.374147)}
{pt3dadd(172740.000000,200136.000000,57650.000000,8.053916)}
{pt3dadd(172236.000000,200472.000000,57250.000000,5.432350)}
{pt3dadd(172008.000000,200724.000000,56675.000000,4.986545)}
{pt3dadd(172476.000000,201144.000000,56175.000000,3.429025)}
{pt3dadd(172812.000000,201696.000000,55950.000000,3.429025)}
{pt3dadd(173460.000000,201948.000000,55225.000000,3.429025)}
{pt3dadd(174072.000000,201948.000000,54300.000000,4.986545)}
{pt3dadd(173496.000000,202248.000000,53625.000000,5.432350)}
{pt3dadd(172608.000000,202536.000000,53350.000000,6.028145)}
{pt3dadd(171540.000000,202812.000000,53675.000000,9.046908)}
{pt3dadd(170820.000000,202908.000000,54350.000000,4.478975)}

{create adhoc38}
{access adhoc38}
{connect adhoc38(1), adhoc36(0)}
{nseg = 1}
{strdef color color = "White"}
{pt3dclear()}
{pt3dadd(173532.000000,199848.000000,57825.000000,13.374147)}
{pt3dadd(174312.000000,199596.000000,57475.000000,7.537939)}
{pt3dadd(174396.000000,199296.000000,56950.000000,5.122763)}
{pt3dadd(174960.000000,198816.000000,56500.000000,4.676958)}
{pt3dadd(175344.000000,198396.000000,56175.000000,3.429025)}
{pt3dadd(175692.000000,197880.000000,55750.000000,3.429025)}
{pt3dadd(175908.000000,197196.000000,55400.000000,3.429025)}
{pt3dadd(175464.000000,196608.000000,54775.000000,5.803854)}
{pt3dadd(174888.000000,195828.000000,54300.000000,5.803854)}
{pt3dadd(175152.000000,194928.000000,53950.000000,7.643718)}
{pt3dadd(175020.000000,194304.000000,53475.000000,11.739529)}
{pt3dadd(174744.000000,194364.000000,53225.000000,10.699318)}

{create adhoc39}
{access adhoc39}
{connect adhoc39(1), adhoc38(0)}
{nseg = 1}
{strdef color color = "White"}
{pt3dclear()}
{pt3dadd(174744.000000,194364.000000,53225.000000,10.699318)}
{pt3dadd(175404.000000,194424.000000,52950.000000,4.478975)}

{create adhoc40}
{access adhoc40}
{connect adhoc40(1), adhoc38(0)}
{nseg = 1}
{strdef color color = "White"}
{pt3dclear()}
{pt3dadd(174744.000000,194364.000000,53225.000000,10.699318)}
{pt3dadd(174024.000000,194172.000000,53000.000000,7.781480)}
{pt3dadd(173604.000000,193740.000000,52600.000000,5.268888)}
{pt3dadd(173604.000000,193092.000000,51900.000000,4.418969)}
{pt3dadd(173172.000000,191856.000000,51450.000000,3.479890)}
{pt3dadd(173100.000000,191748.000000,51300.000000,3.801970)}
{pt3dadd(172908.000000,191124.000000,51075.000000,5.336616)}
{pt3dadd(173028.000000,190128.000000,51100.000000,3.110400)}

{create adhoc41}
{access adhoc41}
{connect adhoc41(1), adhoc23(0)}
{nseg = 1}
{strdef color color = "White"}
{pt3dclear()}
{pt3dadd(176700.000000,199476.000000,62050.000000,33.279160)}
{pt3dadd(175668.000000,199296.000000,62075.000000,18.646970)}
{pt3dadd(174636.000000,199128.000000,62300.000000,10.133806)}
{pt3dadd(174372.000000,199944.000000,62525.000000,7.739669)}

{create adhoc42}
{access adhoc42}
{connect adhoc42(1), adhoc6(0)}
{nseg = 1}
{strdef color color = "White"}
{pt3dclear()}
{pt3dadd(180888.000000,200472.000000,68575.000000,55.206130)}
{pt3dadd(178608.000000,200124.000000,68575.000000,21.051951)}
{pt3dadd(178260.000000,199716.000000,68950.000000,13.231171)}
{pt3dadd(178128.000000,199548.000000,69250.000000,4.047465)}
{pt3dadd(178128.000000,199464.000000,69950.000000,4.986545)}
{pt3dadd(178128.000000,199380.000000,70125.000000,7.310908)}
{pt3dadd(178188.000000,198888.000000,70375.000000,11.145123)}

{create adhoc43}
{access adhoc43}
{connect adhoc43(1), adhoc5(0)}
{nseg = 1}
{strdef color color = "White"}
{pt3dclear()}
{pt3dadd(183240.000000,199104.000000,70175.000000,47.921990)}
{pt3dadd(183720.000000,198984.000000,71125.000000,39.476550)}
{pt3dadd(183480.000000,199188.000000,71775.000000,50.121633)}
{pt3dadd(183252.000000,199404.000000,72500.000000,44.559505)}
{pt3dadd(182856.000000,199884.000000,73200.000000,57.506386)}

{create adhoc44}
{access adhoc44}
{connect adhoc44(1), adhoc43(0)}
{nseg = 1}
{strdef color color = "White"}
{pt3dclear()}
{pt3dadd(182856.000000,199884.000000,73200.000000,57.506386)}
{pt3dadd(183432.000000,199452.000000,73475.000000,42.671349)}
{pt3dadd(183840.000000,199380.000000,74150.000000,53.205873)}
{pt3dadd(184176.000000,199176.000000,74800.000000,46.505107)}
{pt3dadd(186312.000000,196224.000000,75000.000000,69.007660)}

{create adhoc45}
{access adhoc45}
{connect adhoc45(1), adhoc44(0)}
{nseg = 1}
{strdef color color = "White"}
{pt3dclear()}
{pt3dadd(186312.000000,196224.000000,75000.000000,69.007660)}
{pt3dadd(188448.000000,192780.000000,74600.000000,50.001495)}
{pt3dadd(188964.000000,191112.000000,74450.000000,30.600897)}
{pt3dadd(189828.000000,188052.000000,74025.000000,18.656886)}
{pt3dadd(188388.000000,186768.000000,74025.000000,4.615041)}
{pt3dadd(187956.000000,186516.000000,73750.000000,6.691735)}
{pt3dadd(188088.000000,186144.000000,73325.000000,9.287602)}

{create adhoc46}
{access adhoc46}
{connect adhoc46(1), adhoc44(0)}
{nseg = 1}
{strdef color color = "White"}
{pt3dclear()}
{pt3dadd(186312.000000,196224.000000,75000.000000,69.007660)}
{pt3dadd(186984.000000,195828.000000,75950.000000,65.173902)}
{pt3dadd(186780.000000,196788.000000,77075.000000,64.253799)}
{pt3dadd(186732.000000,196872.000000,77550.000000,66.247350)}

{create adhoc47}
{access adhoc47}
{connect adhoc47(1), adhoc46(0)}
{nseg = 1}
{strdef color color = "White"}
{pt3dclear()}
{pt3dadd(186732.000000,196872.000000,77550.000000,66.247350)}
{pt3dadd(186660.000000,198288.000000,78450.000000,45.585003)}
{pt3dadd(186600.000000,199704.000000,80125.000000,41.452534)}
{pt3dadd(186144.000000,201120.000000,81400.000000,39.704341)}
{pt3dadd(185688.000000,202536.000000,82050.000000,42.671349)}
{pt3dadd(185220.000000,203952.000000,83450.000000,57.506386)}

{create adhoc48}
{access adhoc48}
{connect adhoc48(1), adhoc47(0)}
{nseg = 1}
{strdef color color = "White"}
{pt3dclear()}
{pt3dadd(185220.000000,203952.000000,83450.000000,57.506386)}
{pt3dadd(186660.000000,202260.000000,84225.000000,38.837591)}
{pt3dadd(187068.000000,201996.000000,85000.000000,23.902554)}
{pt3dadd(188160.000000,202404.000000,85875.000000,26.202809)}
{pt3dadd(189252.000000,202812.000000,87125.000000,15.001532)}
{pt3dadd(189432.000000,202932.000000,87625.000000,15.001532)}
{pt3dadd(189612.000000,203052.000000,88100.000000,15.001532)}
{pt3dadd(189792.000000,203172.000000,88750.000000,21.357364)}
{pt3dadd(189972.000000,203304.000000,90175.000000,7.855832)}
{pt3dadd(190668.000000,203004.000000,91425.000000,7.855832)}
{pt3dadd(191364.000000,202248.000000,92050.000000,7.855832)}
{pt3dadd(191352.000000,202272.000000,92700.000000,19.057109)}
{pt3dadd(191340.000000,202296.000000,93425.000000,12.701277)}
{pt3dadd(191328.000000,202320.000000,93800.000000,12.701277)}
{pt3dadd(191304.000000,202344.000000,94650.000000,12.701277)}
{pt3dadd(191352.000000,202620.000000,95075.000000,23.902554)}
{pt3dadd(191400.000000,202896.000000,95625.000000,12.701277)}
{pt3dadd(191448.000000,203172.000000,96275.000000,12.701277)}
{pt3dadd(191496.000000,203448.000000,96775.000000,12.701277)}
{pt3dadd(191556.000000,203724.000000,97875.000000,32.275482)}
{pt3dadd(191256.000000,203808.000000,98350.000000,21.074205)}
{pt3dadd(190956.000000,203904.000000,99850.000000,21.074205)}
{pt3dadd(190296.000000,203856.000000,100475.000000,21.074205)}
{pt3dadd(190188.000000,203880.000000,100925.000000,44.623251)}
{pt3dadd(190080.000000,203904.000000,101525.000000,25.049046)}
{pt3dadd(189972.000000,203928.000000,102325.000000,25.049046)}
{pt3dadd(189864.000000,203952.000000,103325.000000,25.049046)}
{pt3dadd(189756.000000,203976.000000,104100.000000,44.623251)}
{pt3dadd(189648.000000,204000.000000,104925.000000,21.074205)}
{pt3dadd(189540.000000,204024.000000,105325.000000,21.074205)}
{pt3dadd(189432.000000,204048.000000,106200.000000,21.074205)}
{pt3dadd(188616.000000,203880.000000,108750.000000,32.275482)}
{pt3dadd(187632.000000,203220.000000,110700.000000,12.701277)}
{pt3dadd(186588.000000,202368.000000,112300.000000,12.701277)}
{pt3dadd(185160.000000,201648.000000,113925.000000,12.701277)}
{pt3dadd(183888.000000,201480.000000,115400.000000,20.388275)}
{pt3dadd(182592.000000,200376.000000,117350.000000,9.186998)}
{pt3dadd(181308.000000,199272.000000,118825.000000,9.186998)}
{pt3dadd(180300.000000,198000.000000,120000.000000,9.186998)}
{pt3dadd(178476.000000,196404.000000,121475.000000,15.542830)}
{pt3dadd(176820.000000,194064.000000,123075.000000,7.855832)}
{pt3dadd(174936.000000,192048.000000,124325.000000,7.855832)}
{pt3dadd(173892.000000,190644.000000,125100.000000,7.855832)}
{pt3dadd(172848.000000,189240.000000,126100.000000,14.211664)}
{pt3dadd(171804.000000,187836.000000,126550.000000,7.855832)}
{pt3dadd(170760.000000,186432.000000,127100.000000,7.855832)}
{pt3dadd(166968.000000,183660.000000,128225.000000,7.855832)}
{pt3dadd(165384.000000,182136.000000,129825.000000,15.542830)}
{pt3dadd(164376.000000,180312.000000,130175.000000,9.186998)}
{pt3dadd(162912.000000,177264.000000,130925.000000,9.186998)}
{pt3dadd(161976.000000,176772.000000,131700.000000,9.186998)}
{pt3dadd(160644.000000,175176.000000,133100.000000,18.471396)}
{pt3dadd(160212.000000,173976.000000,134200.000000,10.784398)}
{pt3dadd(159588.000000,172680.000000,134825.000000,10.784398)}
{pt3dadd(158316.000000,171312.000000,136000.000000,10.784398)}
{pt3dadd(157788.000000,170688.000000,136350.000000,21.985675)}
{pt3dadd(157260.000000,170064.000000,137000.000000,12.701277)}
{pt3dadd(156720.000000,169440.000000,137625.000000,12.701277)}
{pt3dadd(157164.000000,168816.000000,138550.000000,12.701277)}
{pt3dadd(156444.000000,168192.000000,139700.000000,21.985675)}
{pt3dadd(155724.000000,167568.000000,140825.000000,10.784398)}
{pt3dadd(155160.000000,166200.000000,142225.000000,10.784398)}
{pt3dadd(154164.000000,164640.000000,143175.000000,10.784398)}
{pt3dadd(153588.000000,163176.000000,144225.000000,34.333444)}
{pt3dadd(153324.000000,161880.000000,145950.000000,25.049046)}
{pt3dadd(153264.000000,161064.000000,147425.000000,25.049046)}
{pt3dadd(153672.000000,160500.000000,148325.000000,25.049046)}
{pt3dadd(154200.000000,159396.000000,150050.000000,35.790271)}
{pt3dadd(154344.000000,157512.000000,151675.000000,12.241225)}
{pt3dadd(154500.000000,155628.000000,153775.000000,12.241225)}
{pt3dadd(155232.000000,154812.000000,154775.000000,12.241225)}
{pt3dadd(155448.000000,153996.000000,155550.000000,28.503063)}
{pt3dadd(156240.000000,153408.000000,156600.000000,17.761838)}
{pt3dadd(157032.000000,152820.000000,157400.000000,17.761838)}
{pt3dadd(157812.000000,152232.000000,158550.000000,17.761838)}
{pt3dadd(157932.000000,151380.000000,159275.000000,31.263370)}
{pt3dadd(158376.000000,150912.000000,160000.000000,15.001532)}
{pt3dadd(158916.000000,149928.000000,160325.000000,15.001532)}
{pt3dadd(159456.000000,148944.000000,161550.000000,15.001532)}
{pt3dadd(159996.000000,147960.000000,162525.000000,31.263370)}
{pt3dadd(160536.000000,146976.000000,163375.000000,17.761838)}
{pt3dadd(161076.000000,145992.000000,164075.000000,17.761838)}
{pt3dadd(161292.000000,144816.000000,165150.000000,17.761838)}
{pt3dadd(162708.000000,143676.000000,166475.000000,41.310884)}
{pt3dadd(163188.000000,143148.000000,167400.000000,24.949046)}
{pt3dadd(163668.000000,142620.000000,168425.000000,24.949046)}
{pt3dadd(163308.000000,141900.000000,169025.000000,24.949046)}
{pt3dadd(163896.000000,141204.000000,169725.000000,48.498092)}
{pt3dadd(164484.000000,140508.000000,170475.000000,24.949046)}
{pt3dadd(164556.000000,139452.000000,171450.000000,25.049046)}
{pt3dadd(164616.000000,138396.000000,172100.000000,25.049046)}
{pt3dadd(164676.000000,137340.000000,173850.000000,57.717970)}
{pt3dadd(163704.000000,136704.000000,175700.000000,34.168924)}
{pt3dadd(163944.000000,136356.000000,177625.000000,34.168924)}
{pt3dadd(163824.000000,135396.000000,178775.000000,34.168924)}
{pt3dadd(163704.000000,134436.000000,179575.000000,62.487780)}
{pt3dadd(163584.000000,133476.000000,181000.000000,229.518856)}
{pt3dadd(163212.000000,133164.000000,181900.000000,381.531427)}
{pt3dadd(162840.000000,132864.000000,182650.000000,1000.000000)}

{create adhoc49}
{access adhoc49}
{connect adhoc49(1), adhoc47(0)}
{nseg = 1}
{strdef color color = "White"}
{pt3dclear()}
{pt3dadd(185220.000000,203952.000000,83450.000000,57.506386)}
{pt3dadd(184836.000000,205044.000000,82925.000000,35.642792)}
{pt3dadd(184644.000000,205296.000000,82875.000000,21.985675)}
{pt3dadd(184452.000000,205932.000000,82825.000000,16.873996)}
{pt3dadd(184644.000000,206976.000000,82975.000000,7.589598)}
{pt3dadd(184836.000000,208356.000000,83125.000000,7.589598)}
{pt3dadd(184560.000000,209256.000000,83175.000000,7.589598)}
{pt3dadd(183816.000000,210456.000000,83025.000000,10.499394)}
{pt3dadd(183696.000000,211620.000000,83025.000000,4.409795)}
{pt3dadd(183396.000000,212712.000000,82850.000000,4.409795)}
{pt3dadd(183096.000000,213048.000000,82675.000000,4.409795)}
{pt3dadd(181272.000000,214848.000000,81350.000000,12.096793)}
{pt3dadd(181008.000000,215460.000000,81300.000000,9.186998)}
{pt3dadd(180588.000000,216024.000000,81075.000000,9.186998)}
{pt3dadd(180240.000000,216636.000000,80300.000000,9.186998)}
{pt3dadd(179760.000000,217164.000000,79900.000000,16.873996)}
{pt3dadd(179280.000000,217524.000000,79500.000000,19.928224)}
{pt3dadd(178752.000000,218268.000000,78775.000000,32.213707)}
{pt3dadd(177876.000000,218628.000000,78175.000000,55.206130)}

{create adhoc50}
{access adhoc50}
{connect adhoc50(1), adhoc49(0)}
{nseg = 1}
{strdef color color = "White"}
{pt3dclear()}
{pt3dadd(177876.000000,218628.000000,78175.000000,55.206130)}
{pt3dadd(176256.000000,219060.000000,78125.000000,30.171293)}
{pt3dadd(176016.000000,219120.000000,78125.000000,15.484291)}
{pt3dadd(175860.000000,219420.000000,78450.000000,11.145123)}

{create adhoc51}
{access adhoc51}
{connect adhoc51(1), adhoc50(0)}
{nseg = 1}
{strdef color color = "White"}
{pt3dclear()}
{pt3dadd(175860.000000,219420.000000,78450.000000,11.145123)}
{pt3dadd(175836.000000,218988.000000,78750.000000,9.564700)}
{pt3dadd(175800.000000,218784.000000,79425.000000,6.338820)}
{pt3dadd(175848.000000,219072.000000,80025.000000,5.967316)}
{pt3dadd(176088.000000,219252.000000,80775.000000,4.047465)}
{pt3dadd(176388.000000,219444.000000,81250.000000,5.745775)}
{pt3dadd(176532.000000,220224.000000,81675.000000,6.449724)}

{create adhoc52}
{access adhoc52}
{connect adhoc52(1), adhoc50(0)}
{nseg = 1}
{strdef color color = "White"}
{pt3dclear()}
{pt3dadd(175860.000000,219420.000000,78450.000000,11.145123)}
{pt3dadd(174828.000000,220344.000000,78800.000000,13.522749)}
{pt3dadd(174084.000000,221952.000000,79400.000000,16.048977)}

{create adhoc53}
{access adhoc53}
{connect adhoc53(1), adhoc52(0)}
{nseg = 1}
{strdef color color = "White"}
{pt3dclear()}
{pt3dadd(174084.000000,221952.000000,79400.000000,16.048977)}
{pt3dadd(174312.000000,221616.000000,79725.000000,11.145123)}

{create adhoc54}
{access adhoc54}
{connect adhoc54(1), adhoc52(0)}
{nseg = 1}
{strdef color color = "White"}
{pt3dclear()}
{pt3dadd(174084.000000,221952.000000,79400.000000,16.048977)}
{pt3dadd(173556.000000,223008.000000,79625.000000,15.484291)}
{pt3dadd(173028.000000,224064.000000,80275.000000,19.258772)}

{create adhoc55}
{access adhoc55}
{connect adhoc55(1), adhoc54(0)}
{nseg = 1}
{strdef color color = "White"}
{pt3dclear()}
{pt3dadd(173028.000000,224064.000000,80275.000000,19.258772)}
{pt3dadd(172380.000000,225336.000000,80175.000000,10.361089)}
{pt3dadd(171804.000000,225120.000000,79875.000000,5.374770)}

{create adhoc56}
{access adhoc56}
{connect adhoc56(1), adhoc54(0)}
{nseg = 1}
{strdef color color = "White"}
{pt3dclear()}
{pt3dadd(173028.000000,224064.000000,80275.000000,19.258772)}
{pt3dadd(173016.000000,224724.000000,80800.000000,14.623100)}
{pt3dadd(172920.000000,225132.000000,81550.000000,9.373860)}
{pt3dadd(172812.000000,225540.000000,82125.000000,8.196935)}
{pt3dadd(172704.000000,225948.000000,82800.000000,6.784625)}
{pt3dadd(172884.000000,225924.000000,83300.000000,9.694420)}
{pt3dadd(173964.000000,225624.000000,84050.000000,15.157367)}
{pt3dadd(174432.000000,225780.000000,84950.000000,16.048977)}

{create adhoc57}
{access adhoc57}
{connect adhoc57(1), adhoc56(0)}
{nseg = 1}
{strdef color color = "White"}
{pt3dclear()}
{pt3dadd(174432.000000,225780.000000,84950.000000,16.048977)}
{pt3dadd(175032.000000,225084.000000,84950.000000,10.595434)}
{pt3dadd(175416.000000,224376.000000,85100.000000,6.449724)}

{create adhoc58}
{access adhoc58}
{connect adhoc58(1), adhoc56(0)}
{nseg = 1}
{strdef color color = "White"}
{pt3dclear()}
{pt3dadd(174432.000000,225780.000000,84950.000000,16.048977)}
{pt3dadd(174456.000000,226104.000000,85550.000000,11.199318)}
{pt3dadd(174516.000000,226764.000000,86300.000000,12.069250)}
{pt3dadd(174348.000000,227628.000000,87175.000000,9.416098)}
{pt3dadd(173964.000000,228732.000000,88525.000000,13.374147)}

{create adhoc59}
{access adhoc59}
{connect adhoc59(1), adhoc49(0)}
{nseg = 1}
{strdef color color = "White"}
{pt3dclear()}
{pt3dadd(177876.000000,218628.000000,78175.000000,55.206130)}
{pt3dadd(177564.000000,218412.000000,77125.000000,40.984493)}
{pt3dadd(176964.000000,218784.000000,76150.000000,47.593250)}
{pt3dadd(176364.000000,219156.000000,75450.000000,38.837591)}
{pt3dadd(175944.000000,219240.000000,74900.000000,57.506386)}

{create adhoc60}
{access adhoc60}
{connect adhoc60(1), adhoc59(0)}
{nseg = 1}
{strdef color color = "White"}
{pt3dclear()}
{pt3dadd(175944.000000,219240.000000,74900.000000,57.506386)}
{pt3dadd(174384.000000,218136.000000,74925.000000,23.383836)}
{pt3dadd(173592.000000,217536.000000,75250.000000,18.116847)}
{pt3dadd(173256.000000,216792.000000,74900.000000,7.310908)}
{pt3dadd(173496.000000,216096.000000,74450.000000,9.287602)}

{create adhoc61}
{access adhoc61}
{connect adhoc61(1), adhoc59(0)}
{nseg = 1}
{strdef color color = "White"}
{pt3dclear()}
{pt3dadd(175944.000000,219240.000000,74900.000000,57.506386)}
{pt3dadd(175632.000000,219504.000000,74250.000000,38.070838)}
{pt3dadd(175320.000000,219768.000000,73400.000000,23.442503)}
{pt3dadd(174048.000000,220044.000000,72250.000000,19.928223)}
{pt3dadd(172932.000000,220860.000000,71900.000000,15.542830)}
{pt3dadd(172188.000000,221316.000000,71125.000000,20.789356)}
{pt3dadd(171168.000000,222216.000000,70925.000000,33.648927)}
{pt3dadd(170760.000000,222384.000000,70825.000000,27.732632)}

{create adhoc62}
{access adhoc62}
{connect adhoc62(1), adhoc61(0)}
{nseg = 1}
{strdef color color = "White"}
{pt3dclear()}
{pt3dadd(170760.000000,222384.000000,70825.000000,27.732632)}
{pt3dadd(170580.000000,221400.000000,69950.000000,17.447720)}
{pt3dadd(169908.000000,221520.000000,69700.000000,11.068632)}
{pt3dadd(169128.000000,221148.000000,69200.000000,10.144211)}
{pt3dadd(168696.000000,220728.000000,68000.000000,5.822105)}
{pt3dadd(168120.000000,220656.000000,66975.000000,15.106503)}
{pt3dadd(168024.000000,221352.000000,65875.000000,19.428609)}
{pt3dadd(168072.000000,221916.000000,65200.000000,24.177506)}
{pt3dadd(168108.000000,222480.000000,64775.000000,23.110527)}

{create adhoc63}
{access adhoc63}
{connect adhoc63(1), adhoc62(0)}
{nseg = 1}
{strdef color color = "White"}
{pt3dclear()}
{pt3dadd(168108.000000,222480.000000,64775.000000,23.110527)}
{pt3dadd(167724.000000,221196.000000,64500.000000,17.447720)}
{pt3dadd(167028.000000,220956.000000,63500.000000,11.068632)}
{pt3dadd(166464.000000,220584.000000,62700.000000,10.298281)}
{pt3dadd(165768.000000,220440.000000,61850.000000,5.051754)}
{pt3dadd(165564.000000,220824.000000,61300.000000,9.373860)}
{pt3dadd(165744.000000,220116.000000,60425.000000,12.925614)}
{pt3dadd(166044.000000,219804.000000,59750.000000,14.623100)}
{pt3dadd(166452.000000,219912.000000,59225.000000,19.258772)}

{create adhoc64}
{access adhoc64}
{connect adhoc64(1), adhoc63(0)}
{nseg = 1}
{strdef color color = "White"}
{pt3dclear()}
{pt3dadd(166452.000000,219912.000000,59225.000000,19.258772)}
{pt3dadd(166380.000000,220152.000000,58825.000000,13.339181)}
{pt3dadd(166308.000000,220392.000000,58350.000000,10.161029)}
{pt3dadd(166380.000000,219792.000000,57325.000000,7.599220)}
{pt3dadd(166380.000000,219816.000000,56975.000000,5.745775)}
{pt3dadd(166260.000000,219792.000000,56375.000000,6.449724)}

{create adhoc65}
{access adhoc65}
{connect adhoc65(1), adhoc63(0)}
{nseg = 1}
{strdef color color = "White"}
{pt3dclear()}
{pt3dadd(166452.000000,219912.000000,59225.000000,19.258772)}
{pt3dadd(165660.000000,219660.000000,58950.000000,7.739669)}

{create adhoc66}
{access adhoc66}
{connect adhoc66(1), adhoc63(0)}
{nseg = 1}
{strdef color color = "White"}
{pt3dclear()}
{pt3dadd(166452.000000,219912.000000,59225.000000,19.258772)}
{pt3dadd(167088.000000,219324.000000,59000.000000,10.002771)}
{pt3dadd(167424.000000,219204.000000,58975.000000,5.374770)}

{create adhoc67}
{access adhoc67}
{connect adhoc67(1), adhoc62(0)}
{nseg = 1}
{strdef color color = "White"}
{pt3dclear()}
{pt3dadd(168108.000000,222480.000000,64775.000000,23.110527)}
{pt3dadd(167388.000000,224388.000000,64600.000000,20.542690)}
{pt3dadd(166944.000000,225384.000000,64350.000000,22.083392)}
{pt3dadd(166404.000000,225636.000000,64000.000000,27.732632)}

{create adhoc68}
{access adhoc68}
{connect adhoc68(1), adhoc67(0)}
{nseg = 1}
{strdef color color = "White"}
{pt3dclear()}
{pt3dadd(166404.000000,225636.000000,64000.000000,27.732632)}
{pt3dadd(166284.000000,225960.000000,64950.000000,18.160309)}
{pt3dadd(166020.000000,226416.000000,65575.000000,12.011965)}
{pt3dadd(166728.000000,226116.000000,66100.000000,9.287602)}

{create adhoc69}
{access adhoc69}
{connect adhoc69(1), adhoc67(0)}
{nseg = 1}
{strdef color color = "White"}
{pt3dclear()}
{pt3dadd(166404.000000,225636.000000,64000.000000,27.732632)}
{pt3dadd(166224.000000,226164.000000,63550.000000,12.840078)}
{pt3dadd(165324.000000,226932.000000,62475.000000,8.304047)}
{pt3dadd(164616.000000,228708.000000,61775.000000,9.413352)}
{pt3dadd(162924.000000,228648.000000,61275.000000,11.407586)}
{pt3dadd(162192.000000,228948.000000,60650.000000,18.012644)}
{pt3dadd(162480.000000,228948.000000,59700.000000,19.258772)}

{create adhoc70}
{access adhoc70}
{connect adhoc70(1), adhoc61(0)}
{nseg = 1}
{strdef color color = "White"}
{pt3dclear()}
{pt3dadd(170760.000000,222384.000000,70825.000000,27.732632)}
{pt3dadd(169848.000000,224148.000000,71125.000000,18.988421)}
{pt3dadd(168456.000000,225780.000000,71375.000000,11.993053)}
{pt3dadd(166620.000000,226980.000000,71525.000000,9.656322)}
{pt3dadd(165684.000000,227964.000000,72350.000000,8.731901)}
{pt3dadd(165240.000000,229440.000000,73075.000000,13.553168)}
{pt3dadd(164844.000000,230040.000000,72850.000000,23.110527)}

{create adhoc71}
{access adhoc71}
{connect adhoc71(1), adhoc46(0)}
{nseg = 1}
{strdef color color = "White"}
{pt3dclear()}
{pt3dadd(186732.000000,196872.000000,77550.000000,66.247350)}
{pt3dadd(184656.000000,197244.000000,77525.000000,25.162340)}
{pt3dadd(183864.000000,197376.000000,77975.000000,18.607199)}
{pt3dadd(183708.000000,197460.000000,78625.000000,8.032559)}
{pt3dadd(184332.000000,197112.000000,79650.000000,10.307708)}
{pt3dadd(184980.000000,197004.000000,80175.000000,13.374147)}

{create adhoc72}
{access adhoc72}
{connect adhoc72(1), adhoc46(0)}
{nseg = 1}
{strdef color color = "White"}
{pt3dclear()}
{pt3dadd(186732.000000,196872.000000,77550.000000,66.247350)}
{pt3dadd(188064.000000,193236.000000,76825.000000,46.005108)}

{create adhoc73}
{access adhoc73}
{connect adhoc73(1), adhoc72(0)}
{nseg = 1}
{strdef color color = "White"}
{pt3dclear()}
{pt3dadd(188064.000000,193236.000000,76825.000000,46.005108)}
{pt3dadd(186804.000000,192696.000000,76800.000000,17.984944)}
{pt3dadd(186624.000000,192624.000000,76800.000000,14.506007)}
{pt3dadd(186000.000000,191988.000000,76375.000000,6.691735)}
{pt3dadd(185928.000000,192072.000000,76000.000000,9.287602)}

{create adhoc74}
{access adhoc74}
{connect adhoc74(1), adhoc72(0)}
{nseg = 1}
{strdef color color = "White"}
{pt3dclear()}
{pt3dadd(188064.000000,193236.000000,76825.000000,46.005108)}
{pt3dadd(188772.000000,191280.000000,76400.000000,31.947992)}

{create adhoc75}
{access adhoc75}
{connect adhoc75(1), adhoc43(0)}
{nseg = 1}
{strdef color color = "White"}
{pt3dclear()}
{pt3dadd(182856.000000,199884.000000,73200.000000,57.506386)}
{pt3dadd(180948.000000,201444.000000,73200.000000,28.798182)}
{pt3dadd(180780.000000,201576.000000,73200.000000,12.725254)}
{pt3dadd(179892.000000,202548.000000,73800.000000,9.287602)}

{create adhoc76}
{access adhoc76}
{connect adhoc76(1), adhoc75(0)}
{nseg = 1}
{strdef color color = "White"}
{pt3dclear()}
{pt3dadd(179892.000000,202548.000000,73800.000000,9.287602)}
{pt3dadd(180216.000000,202128.000000,73975.000000,11.541394)}
{pt3dadd(180804.000000,202200.000000,74250.000000,11.025416)}
{pt3dadd(180876.000000,202068.000000,75225.000000,7.739669)}

{create adhoc77}
{access adhoc77}
{connect adhoc77(1), adhoc75(0)}
{nseg = 1}
{strdef color color = "White"}
{pt3dclear()}
{pt3dadd(179892.000000,202548.000000,73800.000000,9.287602)}
{pt3dadd(179160.000000,203640.000000,74100.000000,10.525949)}
{pt3dadd(179100.000000,205008.000000,74700.000000,15.133591)}
{pt3dadd(179004.000000,205716.000000,75175.000000,23.110527)}
