# Supplementary material for: Full reconstruction of large lobula plate tangential cells in Drosophila from a 3D EM dataset
Source: PLoS One. 2018 Nov 28;13(11):e0207828. doi: 10.1371/journal.pone.0207828 (PMC6261601; doi:10.1371/journal.pone.0207828)
Supplement: S1 Dataset — (ZIP) [file pone.0207828.s001.zip › Diameter hoc/VS_VSL_preliminary/VS4_skels_ck.001_completed.hoc0004.hoc]

/* created with convertKnossosNmlToHoc.m */

{create adhoc1}
{access adhoc1}
{nseg = 1}
{strdef color color = "White"}
{pt3dclear()}
{pt3dadd(189360.000000,180192.000000,67125.000000,1.500000)}
{pt3dadd(190128.000000,180660.000000,67100.000000,1.500000)}

{create adhoc2}
{access adhoc2}
{connect adhoc2(1), adhoc1(0)}
{nseg = 1}
{strdef color color = "White"}
{pt3dclear()}
{pt3dadd(190128.000000,180660.000000,67100.000000,1.500000)}
{pt3dadd(189600.000000,180792.000000,66500.000000,1.500000)}
{pt3dadd(189072.000000,180924.000000,66125.000000,1.500000)}
{pt3dadd(188304.000000,181452.000000,65600.000000,1.500000)}
{pt3dadd(187668.000000,181668.000000,65075.000000,1.500000)}
{pt3dadd(187320.000000,181860.000000,64450.000000,1.500000)}
{pt3dadd(186972.000000,182040.000000,64200.000000,1.500000)}

{create adhoc3}
{access adhoc3}
{connect adhoc3(1), adhoc2(0)}
{nseg = 1}
{strdef color color = "White"}
{pt3dclear()}
{pt3dadd(186972.000000,182040.000000,64200.000000,1.500000)}
{pt3dadd(186696.000000,182172.000000,63475.000000,1.500000)}
{pt3dadd(186492.000000,182256.000000,62925.000000,1.500000)}
{pt3dadd(186288.000000,182340.000000,62575.000000,1.500000)}
{pt3dadd(185988.000000,182112.000000,61850.000000,1.500000)}
{pt3dadd(185688.000000,181896.000000,61250.000000,1.500000)}
{pt3dadd(184488.000000,181704.000000,60525.000000,1.500000)}

{create adhoc4}
{access adhoc4}
{connect adhoc4(1), adhoc2(0)}
{nseg = 1}
{strdef color color = "White"}
{pt3dclear()}
{pt3dadd(186972.000000,182040.000000,64200.000000,1.500000)}
{pt3dadd(185652.000000,182928.000000,64375.000000,1.500000)}
{pt3dadd(185676.000000,183000.000000,64850.000000,1.500000)}
{pt3dadd(184968.000000,183228.000000,65600.000000,1.500000)}
{pt3dadd(184908.000000,183480.000000,65600.000000,1.500000)}
{pt3dadd(184428.000000,184008.000000,66025.000000,1.500000)}

{create adhoc5}
{access adhoc5}
{connect adhoc5(1), adhoc1(0)}
{nseg = 1}
{strdef color color = "White"}
{pt3dclear()}
{pt3dadd(190128.000000,180660.000000,67100.000000,1.500000)}
{pt3dadd(190656.000000,180528.000000,68050.000000,1.500000)}
{pt3dadd(190620.000000,180204.000000,68600.000000,1.500000)}

{create adhoc6}
{access adhoc6}
{connect adhoc6(1), adhoc5(0)}
{nseg = 1}
{strdef color color = "White"}
{pt3dclear()}
{pt3dadd(190620.000000,180204.000000,68600.000000,1.500000)}
{pt3dadd(189720.000000,178740.000000,68500.000000,1.500000)}
{pt3dadd(189576.000000,178788.000000,68475.000000,1.500000)}
{pt3dadd(189396.000000,178560.000000,67650.000000,1.500000)}

{create adhoc7}
{access adhoc7}
{connect adhoc7(1), adhoc5(0)}
{nseg = 1}
{strdef color color = "White"}
{pt3dclear()}
{pt3dadd(190620.000000,180204.000000,68600.000000,1.500000)}
{pt3dadd(190812.000000,180396.000000,69100.000000,1.500000)}
{pt3dadd(191004.000000,180588.000000,69850.000000,1.500000)}
{pt3dadd(191760.000000,180696.000000,70575.000000,1.500000)}
{pt3dadd(191160.000000,180516.000000,70975.000000,1.500000)}

{create adhoc8}
{access adhoc8}
{connect adhoc8(1), adhoc7(0)}
{nseg = 1}
{strdef color color = "White"}
{pt3dclear()}
{pt3dadd(191160.000000,180516.000000,70975.000000,1.500000)}
{pt3dadd(190584.000000,179316.000000,71075.000000,1.500000)}

{create adhoc9}
{access adhoc9}
{connect adhoc9(1), adhoc7(0)}
{nseg = 1}
{strdef color color = "White"}
{pt3dclear()}
{pt3dadd(191160.000000,180516.000000,70975.000000,1.500000)}
{pt3dadd(191400.000000,180852.000000,71250.000000,1.500000)}
{pt3dadd(191640.000000,181188.000000,71725.000000,1.500000)}
{pt3dadd(191880.000000,181524.000000,72275.000000,1.500000)}
{pt3dadd(192120.000000,181860.000000,72700.000000,201.200000)}
{pt3dadd(192360.000000,182184.000000,73250.000000,201.200000)}
{pt3dadd(192000.000000,182508.000000,73775.000000,201.200000)}
{pt3dadd(190524.000000,182196.000000,73425.000000,201.200000)}
{pt3dadd(189792.000000,182040.000000,73075.000000,1.500000)}
{pt3dadd(189060.000000,181896.000000,72925.000000,1.500000)}
