# Supplementary material for: Full reconstruction of large lobula plate tangential cells in Drosophila from a 3D EM dataset
Source: PLoS One. 2018 Nov 28;13(11):e0207828. doi: 10.1371/journal.pone.0207828 (PMC6261601; doi:10.1371/journal.pone.0207828)
Supplement: S1 Dataset — (ZIP) [file pone.0207828.s001.zip › Diameter hoc/VS_VSL_preliminary/VS4_skels_ck.001_completed.hoc0007.hoc]

/* created with convertKnossosNmlToHoc.m */

{create adhoc1}
{access adhoc1}
{nseg = 1}
{strdef color color = "White"}
{pt3dclear()}
{pt3dadd(178872.000000,221844.000000,86175.000000,6.449724)}
{pt3dadd(178932.000000,221676.000000,86100.000000,5.229798)}
{pt3dadd(178776.000000,221460.000000,85975.000000,3.737879)}
{pt3dadd(178848.000000,221268.000000,85950.000000,3.995868)}
{pt3dadd(178728.000000,221052.000000,85775.000000,5.122763)}
{pt3dadd(178452.000000,220728.000000,85525.000000,7.537939)}
{pt3dadd(178116.000000,220584.000000,85525.000000,13.374147)}

{create adhoc2}
{access adhoc2}
{connect adhoc2(1), adhoc1(0)}
{nseg = 1}
{strdef color color = "White"}
{pt3dclear()}
{pt3dadd(178116.000000,220584.000000,85525.000000,13.374147)}
{pt3dadd(177744.000000,220800.000000,86275.000000,7.930082)}
{pt3dadd(177576.000000,221064.000000,86250.000000,9.042798)}
{pt3dadd(177360.000000,221412.000000,86425.000000,7.641249)}
{pt3dadd(177408.000000,221892.000000,86750.000000,5.374770)}

{create adhoc3}
{access adhoc3}
{connect adhoc3(1), adhoc1(0)}
{nseg = 1}
{strdef color color = "White"}
{pt3dclear()}
{pt3dadd(178116.000000,220584.000000,85525.000000,13.374147)}
{pt3dadd(178116.000000,220248.000000,85250.000000,8.673090)}
{pt3dadd(178152.000000,220032.000000,84900.000000,5.803854)}
{pt3dadd(178140.000000,219552.000000,84350.000000,5.803854)}
{pt3dadd(178056.000000,219228.000000,84175.000000,3.874829)}
{pt3dadd(178152.000000,218916.000000,83900.000000,3.874829)}
{pt3dadd(178428.000000,218616.000000,83850.000000,3.874829)}
{pt3dadd(178380.000000,218256.000000,83650.000000,7.272514)}
{pt3dadd(178248.000000,217992.000000,83100.000000,4.897684)}
{pt3dadd(178356.000000,217692.000000,82950.000000,4.897684)}
{pt3dadd(178752.000000,217392.000000,81975.000000,7.272514)}
{pt3dadd(178788.000000,217176.000000,81800.000000,14.959512)}
{pt3dadd(179064.000000,216900.000000,81625.000000,18.269712)}
{pt3dadd(179988.000000,216708.000000,80475.000000,39.934990)}

{create adhoc4}
{access adhoc4}
{connect adhoc4(1), adhoc3(0)}
{nseg = 1}
{strdef color color = "White"}
{pt3dclear()}
{pt3dadd(179988.000000,216708.000000,80475.000000,39.934990)}
{pt3dadd(179448.000000,217020.000000,79900.000000,24.904717)}
{pt3dadd(179160.000000,217500.000000,79275.000000,15.542830)}
{pt3dadd(178584.000000,218328.000000,78775.000000,21.357364)}
{pt3dadd(177564.000000,218496.000000,77875.000000,15.001532)}
{pt3dadd(177540.000000,218520.000000,77225.000000,15.001532)}
{pt3dadd(177300.000000,218652.000000,76575.000000,28.503064)}
{pt3dadd(176976.000000,218820.000000,76000.000000,42.004596)}
{pt3dadd(176532.000000,219000.000000,75475.000000,46.505107)}
{pt3dadd(176160.000000,219228.000000,74875.000000,69.007660)}

{create adhoc5}
{access adhoc5}
{connect adhoc5(1), adhoc4(0)}
{nseg = 1}
{strdef color color = "White"}
{pt3dclear()}
{pt3dadd(176160.000000,219228.000000,74875.000000,69.007660)}
{pt3dadd(173628.000000,217572.000000,75125.000000,25.652461)}
{pt3dadd(173280.000000,216612.000000,75150.000000,18.796931)}
{pt3dadd(173448.000000,216204.000000,74400.000000,6.175757)}
{pt3dadd(173460.000000,216204.000000,74350.000000,7.739669)}

{create adhoc6}
{access adhoc6}
{connect adhoc6(1), adhoc4(0)}
{nseg = 1}
{strdef color color = "White"}
{pt3dclear()}
{pt3dadd(176160.000000,219228.000000,74875.000000,69.007660)}
{pt3dadd(175800.000000,219324.000000,74400.000000,46.505107)}
{pt3dadd(175452.000000,219624.000000,74050.000000,28.503064)}
{pt3dadd(175140.000000,219552.000000,73325.000000,21.357364)}
{pt3dadd(174660.000000,219852.000000,72675.000000,7.855832)}
{pt3dadd(173820.000000,220236.000000,71975.000000,7.855832)}
{pt3dadd(173508.000000,220392.000000,71900.000000,7.855832)}
{pt3dadd(173196.000000,220392.000000,71950.000000,14.211664)}
{pt3dadd(172884.000000,220440.000000,71500.000000,7.855832)}
{pt3dadd(172620.000000,220836.000000,71375.000000,7.855832)}
{pt3dadd(172260.000000,221232.000000,71275.000000,7.855832)}
{pt3dadd(171924.000000,221496.000000,71075.000000,14.211664)}
{pt3dadd(171588.000000,221556.000000,70875.000000,13.945430)}
{pt3dadd(171264.000000,221976.000000,70925.000000,19.191957)}
{pt3dadd(170916.000000,222396.000000,70975.000000,30.986595)}
{pt3dadd(170652.000000,222756.000000,71025.000000,27.732632)}

{create adhoc7}
{access adhoc7}
{connect adhoc7(1), adhoc6(0)}
{nseg = 1}
{strdef color color = "White"}
{pt3dclear()}
{pt3dadd(170652.000000,222756.000000,71025.000000,27.732632)}
{pt3dadd(170592.000000,221460.000000,69925.000000,16.163801)}
{pt3dadd(170292.000000,221472.000000,69825.000000,10.298281)}
{pt3dadd(170076.000000,221496.000000,69725.000000,8.603509)}
{pt3dadd(169764.000000,221544.000000,69650.000000,5.051754)}
{pt3dadd(169440.000000,221556.000000,69550.000000,5.051754)}
{pt3dadd(169116.000000,221376.000000,69200.000000,5.051754)}
{pt3dadd(168780.000000,221064.000000,68775.000000,14.336152)}
{pt3dadd(168528.000000,220788.000000,67650.000000,10.784398)}
{pt3dadd(168312.000000,220764.000000,67225.000000,10.784398)}
{pt3dadd(168096.000000,220776.000000,66700.000000,10.784398)}
{pt3dadd(168324.000000,220644.000000,66125.000000,17.140230)}
{pt3dadd(167928.000000,221412.000000,65800.000000,7.855832)}
{pt3dadd(168084.000000,221808.000000,65300.000000,7.855832)}
{pt3dadd(168084.000000,222192.000000,65050.000000,14.211664)}
{pt3dadd(167424.000000,224544.000000,64850.000000,17.763418)}
{pt3dadd(166584.000000,225684.000000,63825.000000,18.012644)}
{pt3dadd(166200.000000,225840.000000,63300.000000,19.258772)}

{create adhoc8}
{access adhoc8}
{connect adhoc8(1), adhoc6(0)}
{nseg = 1}
{strdef color color = "White"}
{pt3dclear()}
{pt3dadd(170652.000000,222756.000000,71025.000000,27.732632)}
{pt3dadd(170436.000000,223764.000000,71525.000000,18.988421)}
{pt3dadd(170172.000000,223932.000000,71425.000000,11.993053)}
{pt3dadd(169932.000000,223992.000000,71400.000000,11.993053)}
{pt3dadd(169704.000000,224088.000000,71500.000000,6.746526)}
{pt3dadd(169392.000000,224352.000000,71600.000000,6.746526)}
{pt3dadd(169056.000000,224844.000000,71375.000000,6.746526)}
{pt3dadd(168744.000000,225156.000000,71275.000000,11.771192)}
{pt3dadd(168504.000000,225468.000000,71325.000000,6.524666)}
{pt3dadd(168264.000000,225672.000000,71275.000000,6.524666)}
{pt3dadd(168036.000000,225948.000000,71200.000000,6.524666)}
{pt3dadd(167724.000000,226212.000000,71175.000000,12.880498)}
{pt3dadd(167412.000000,226416.000000,71250.000000,7.855832)}
{pt3dadd(167112.000000,226644.000000,71375.000000,7.855832)}
{pt3dadd(166848.000000,226848.000000,71375.000000,7.855832)}
{pt3dadd(166524.000000,227196.000000,71925.000000,12.177937)}
{pt3dadd(166212.000000,227424.000000,72175.000000,5.822105)}
{pt3dadd(165900.000000,227820.000000,72325.000000,7.751130)}
{pt3dadd(165540.000000,228240.000000,72500.000000,9.680155)}
{pt3dadd(164772.000000,229896.000000,72800.000000,7.930082)}
{pt3dadd(164640.000000,230064.000000,72575.000000,11.145123)}

{create adhoc9}
{access adhoc9}
{connect adhoc9(1), adhoc3(0)}
{nseg = 1}
{strdef color color = "White"}
{pt3dclear()}
{pt3dadd(179988.000000,216708.000000,80475.000000,39.934990)}
{pt3dadd(180096.000000,216420.000000,80650.000000,27.123327)}
{pt3dadd(180384.000000,216060.000000,80825.000000,16.873996)}
{pt3dadd(180756.000000,215808.000000,80875.000000,16.873996)}
{pt3dadd(180828.000000,215532.000000,81175.000000,9.186998)}
{pt3dadd(181032.000000,215244.000000,81400.000000,9.186998)}
{pt3dadd(181428.000000,215016.000000,82050.000000,9.186998)}
{pt3dadd(182340.000000,213624.000000,82300.000000,11.561827)}
{pt3dadd(182556.000000,213264.000000,82375.000000,3.874829)}
{pt3dadd(182868.000000,213048.000000,82500.000000,3.874829)}
{pt3dadd(183036.000000,212736.000000,82625.000000,3.874829)}
{pt3dadd(183180.000000,212508.000000,82625.000000,6.249659)}
{pt3dadd(183276.000000,212256.000000,82700.000000,3.874829)}
{pt3dadd(183492.000000,211968.000000,82850.000000,3.874829)}
{pt3dadd(183588.000000,211656.000000,83050.000000,3.874829)}
{pt3dadd(183564.000000,211332.000000,83050.000000,9.121356)}
{pt3dadd(183504.000000,211020.000000,83000.000000,6.746526)}
{pt3dadd(183564.000000,210744.000000,83000.000000,6.746526)}
{pt3dadd(183804.000000,210408.000000,82975.000000,6.746526)}
{pt3dadd(183900.000000,210192.000000,83075.000000,13.102358)}
{pt3dadd(184044.000000,209964.000000,83150.000000,7.855832)}
{pt3dadd(184212.000000,209652.000000,83050.000000,7.855832)}
{pt3dadd(184380.000000,209388.000000,83000.000000,7.855832)}
{pt3dadd(184524.000000,209040.000000,83050.000000,15.542830)}
{pt3dadd(184632.000000,208716.000000,83075.000000,9.186998)}
{pt3dadd(184656.000000,208596.000000,83100.000000,9.186998)}
{pt3dadd(184632.000000,208296.000000,83075.000000,9.186998)}
{pt3dadd(184584.000000,207984.000000,82900.000000,18.471396)}
{pt3dadd(184584.000000,207672.000000,82825.000000,10.784398)}
{pt3dadd(184584.000000,207312.000000,82825.000000,10.784398)}
{pt3dadd(184764.000000,207048.000000,83125.000000,10.784398)}
{pt3dadd(184668.000000,206748.000000,83000.000000,18.471396)}
{pt3dadd(184572.000000,206376.000000,83025.000000,16.873996)}
{pt3dadd(184608.000000,206112.000000,83100.000000,30.375528)}
{pt3dadd(184848.000000,205764.000000,83250.000000,49.625880)}
{pt3dadd(185748.000000,202440.000000,83200.000000,69.007660)}

{create adhoc10}
{access adhoc10}
{connect adhoc10(1), adhoc9(0)}
{nseg = 1}
{strdef color color = "White"}
{pt3dclear()}
{pt3dadd(185748.000000,202440.000000,83200.000000,69.007660)}
{pt3dadd(186432.000000,202692.000000,83975.000000,42.671349)}
{pt3dadd(186948.000000,202356.000000,84700.000000,26.202809)}
{pt3dadd(187296.000000,202332.000000,85300.000000,20.388275)}
{pt3dadd(187740.000000,202692.000000,85825.000000,9.186998)}
{pt3dadd(188328.000000,202824.000000,86500.000000,9.186998)}
{pt3dadd(188640.000000,202968.000000,87100.000000,9.186998)}
{pt3dadd(189216.000000,203004.000000,87725.000000,27.966232)}
{pt3dadd(189396.000000,202992.000000,88350.000000,20.279234)}
{pt3dadd(189636.000000,203052.000000,88925.000000,20.279234)}
{pt3dadd(189840.000000,203184.000000,89425.000000,20.279234)}
{pt3dadd(189984.000000,203316.000000,89975.000000,43.828280)}
{pt3dadd(189984.000000,203304.000000,90525.000000,25.049046)}
{pt3dadd(190284.000000,203028.000000,91100.000000,25.049046)}
{pt3dadd(190536.000000,202668.000000,91850.000000,25.049046)}
{pt3dadd(190644.000000,202392.000000,92525.000000,44.623251)}
{pt3dadd(190848.000000,202272.000000,93100.000000,21.074205)}
{pt3dadd(191304.000000,202332.000000,93750.000000,21.074205)}
{pt3dadd(191520.000000,202572.000000,94425.000000,21.074205)}
{pt3dadd(191592.000000,202812.000000,95100.000000,49.393061)}
{pt3dadd(191556.000000,203028.000000,95600.000000,29.818856)}
{pt3dadd(191724.000000,203316.000000,96300.000000,29.818856)}
{pt3dadd(191484.000000,203568.000000,96800.000000,29.818856)}
{pt3dadd(191388.000000,203880.000000,97475.000000,49.393061)}
{pt3dadd(191448.000000,203916.000000,98000.000000,21.074205)}
{pt3dadd(191424.000000,203952.000000,98725.000000,21.074205)}
{pt3dadd(191232.000000,204060.000000,99200.000000,21.074205)}
{pt3dadd(191004.000000,203928.000000,99850.000000,34.575737)}
{pt3dadd(190740.000000,204036.000000,100475.000000,15.001532)}
{pt3dadd(190512.000000,203976.000000,101100.000000,15.001532)}
{pt3dadd(190248.000000,203964.000000,101675.000000,15.001532)}
{pt3dadd(189780.000000,204024.000000,102175.000000,34.575737)}
{pt3dadd(189720.000000,204048.000000,102750.000000,21.074205)}
{pt3dadd(189720.000000,204216.000000,103475.000000,21.074205)}
{pt3dadd(189732.000000,204060.000000,104075.000000,21.074205)}
{pt3dadd(189600.000000,204228.000000,104500.000000,40.648410)}
{pt3dadd(189444.000000,204216.000000,105250.000000,21.074205)}
{pt3dadd(189396.000000,204252.000000,106100.000000,21.074205)}
{pt3dadd(189240.000000,204324.000000,106625.000000,21.074205)}
{pt3dadd(188892.000000,204132.000000,107325.000000,37.336043)}
{pt3dadd(188880.000000,203940.000000,107925.000000,17.761838)}
{pt3dadd(188628.000000,203892.000000,108525.000000,17.661838)}
{pt3dadd(188472.000000,203640.000000,109125.000000,17.661838)}
{pt3dadd(188076.000000,203628.000000,109625.000000,30.611308)}
{pt3dadd(187896.000000,203520.000000,110050.000000,14.349470)}
{pt3dadd(187644.000000,203208.000000,110600.000000,14.349470)}
{pt3dadd(187404.000000,203028.000000,111150.000000,14.449470)}
{pt3dadd(187056.000000,202788.000000,111775.000000,25.650747)}
{pt3dadd(186396.000000,202464.000000,112450.000000,12.701277)}
{pt3dadd(186024.000000,202176.000000,113075.000000,12.701277)}
{pt3dadd(185112.000000,201840.000000,113775.000000,12.701277)}
{pt3dadd(184704.000000,201660.000000,114425.000000,26.202809)}
{pt3dadd(184536.000000,201552.000000,114900.000000,15.001532)}
{pt3dadd(183912.000000,201288.000000,115625.000000,15.001532)}
{pt3dadd(183600.000000,201060.000000,116100.000000,15.001532)}
{pt3dadd(183348.000000,200772.000000,116675.000000,23.534512)}
{pt3dadd(182868.000000,200400.000000,117250.000000,10.032980)}
{pt3dadd(182388.000000,199764.000000,117900.000000,10.032980)}
{pt3dadd(181920.000000,199488.000000,118550.000000,10.032980)}
{pt3dadd(180960.000000,199224.000000,119075.000000,17.719978)}
{pt3dadd(181056.000000,198552.000000,119600.000000,9.186998)}
{pt3dadd(180108.000000,197868.000000,120050.000000,9.186998)}
{pt3dadd(179964.000000,197724.000000,120500.000000,9.186998)}
{pt3dadd(179268.000000,197040.000000,120925.000000,16.873996)}
{pt3dadd(178692.000000,196632.000000,121450.000000,9.186998)}
{pt3dadd(178044.000000,196032.000000,121950.000000,9.186998)}
{pt3dadd(177396.000000,195084.000000,122500.000000,9.186998)}
{pt3dadd(176748.000000,194124.000000,122975.000000,18.471396)}
{pt3dadd(176088.000000,193344.000000,123475.000000,10.784398)}
{pt3dadd(175680.000000,193044.000000,123750.000000,10.784398)}
{pt3dadd(175356.000000,192792.000000,123925.000000,10.784398)}
{pt3dadd(175176.000000,192456.000000,124150.000000,18.471396)}
{pt3dadd(174852.000000,192000.000000,124275.000000,9.186998)}
{pt3dadd(174600.000000,191664.000000,124525.000000,9.186998)}
{pt3dadd(174504.000000,191352.000000,124500.000000,9.186998)}
{pt3dadd(174360.000000,190992.000000,124725.000000,15.542830)}
{pt3dadd(174000.000000,190620.000000,125000.000000,7.855832)}
{pt3dadd(173832.000000,190284.000000,125125.000000,7.855832)}
{pt3dadd(173580.000000,189972.000000,125325.000000,7.855832)}
{pt3dadd(173448.000000,189732.000000,125450.000000,14.211664)}
{pt3dadd(173280.000000,189468.000000,125500.000000,7.855832)}
{pt3dadd(173076.000000,189204.000000,125725.000000,7.855832)}
{pt3dadd(172608.000000,188844.000000,125925.000000,7.855832)}
{pt3dadd(172512.000000,188484.000000,126050.000000,14.211664)}
{pt3dadd(172332.000000,188112.000000,126150.000000,7.855832)}
{pt3dadd(172020.000000,187776.000000,126250.000000,7.855832)}
{pt3dadd(171768.000000,187404.000000,126375.000000,7.855832)}
{pt3dadd(171444.000000,187008.000000,126575.000000,13.945431)}
{pt3dadd(170964.000000,186684.000000,126650.000000,7.589599)}
{pt3dadd(170652.000000,186432.000000,126800.000000,7.589599)}
{pt3dadd(170544.000000,186204.000000,126925.000000,7.589599)}
{pt3dadd(170076.000000,185820.000000,127125.000000,15.276597)}
{pt3dadd(169500.000000,185532.000000,127300.000000,9.186998)}
{pt3dadd(168948.000000,185184.000000,127450.000000,9.186998)}
{pt3dadd(168816.000000,184908.000000,127450.000000,9.186998)}
{pt3dadd(168408.000000,184524.000000,127700.000000,18.088020)}
{pt3dadd(168228.000000,184152.000000,127750.000000,10.401022)}
{pt3dadd(167748.000000,183780.000000,128075.000000,10.401022)}
{pt3dadd(167124.000000,183504.000000,128425.000000,10.401022)}
{pt3dadd(166428.000000,183216.000000,128675.000000,18.088020)}
{pt3dadd(166392.000000,182784.000000,128100.000000,9.186998)}
{pt3dadd(166236.000000,182520.000000,128150.000000,9.186998)}
{pt3dadd(165888.000000,182112.000000,128550.000000,9.186998)}
{pt3dadd(165864.000000,181632.000000,128750.000000,14.433524)}
{pt3dadd(165420.000000,181200.000000,129100.000000,6.746526)}
{pt3dadd(165552.000000,180852.000000,128950.000000,6.746526)}
{pt3dadd(165348.000000,180456.000000,129200.000000,6.746526)}
{pt3dadd(165180.000000,179964.000000,129350.000000,13.102358)}
{pt3dadd(164892.000000,179436.000000,129525.000000,7.855832)}
{pt3dadd(164520.000000,179064.000000,129850.000000,7.855832)}
{pt3dadd(164244.000000,178764.000000,130075.000000,7.855832)}
{pt3dadd(163932.000000,178440.000000,130175.000000,14.211664)}
{pt3dadd(163344.000000,178080.000000,130725.000000,7.855832)}
{pt3dadd(163056.000000,177864.000000,130975.000000,7.855832)}
{pt3dadd(162648.000000,177432.000000,131250.000000,7.855832)}
{pt3dadd(162336.000000,177060.000000,131500.000000,15.542830)}
{pt3dadd(162000.000000,176700.000000,131800.000000,9.186998)}
{pt3dadd(161712.000000,176592.000000,131925.000000,9.186998)}
{pt3dadd(161400.000000,175932.000000,132325.000000,9.186998)}
{pt3dadd(161088.000000,175728.000000,132525.000000,18.471396)}
{pt3dadd(160752.000000,175284.000000,132875.000000,10.784398)}
{pt3dadd(160512.000000,174924.000000,133050.000000,10.784398)}
{pt3dadd(160212.000000,174336.000000,133600.000000,10.784398)}
{pt3dadd(159840.000000,173448.000000,134400.000000,18.471396)}
{pt3dadd(158928.000000,172032.000000,135225.000000,9.186998)}
{pt3dadd(158652.000000,171216.000000,136000.000000,9.186998)}
{pt3dadd(157740.000000,170508.000000,136725.000000,9.186998)}
{pt3dadd(156792.000000,169776.000000,137375.000000,22.688530)}
{pt3dadd(156432.000000,169416.000000,137950.000000,15.001532)}
{pt3dadd(157044.000000,168768.000000,138600.000000,15.001532)}
{pt3dadd(156852.000000,168072.000000,139375.000000,15.001532)}
{pt3dadd(156348.000000,167868.000000,140025.000000,25.742758)}
{pt3dadd(156096.000000,167580.000000,140500.000000,12.241226)}
{pt3dadd(155592.000000,167340.000000,141150.000000,12.241226)}
{pt3dadd(155268.000000,167064.000000,141700.000000,12.241226)}
{pt3dadd(155028.000000,166176.000000,142250.000000,25.190696)}
{pt3dadd(154716.000000,165324.000000,142925.000000,14.449470)}
{pt3dadd(153960.000000,164268.000000,143575.000000,14.449470)}
{pt3dadd(153648.000000,163428.000000,144250.000000,14.449470)}
{pt3dadd(153360.000000,162660.000000,144925.000000,37.998516)}
{pt3dadd(153324.000000,162300.000000,145475.000000,25.049046)}
{pt3dadd(153084.000000,161748.000000,146225.000000,25.049046)}
{pt3dadd(153096.000000,160980.000000,146950.000000,25.049046)}
{pt3dadd(153288.000000,160620.000000,147550.000000,48.598092)}
{pt3dadd(153288.000000,160116.000000,148225.000000,25.049046)}
{pt3dadd(153312.000000,159600.000000,148875.000000,25.049046)}
{pt3dadd(153588.000000,159288.000000,149375.000000,25.049046)}
{pt3dadd(153972.000000,159000.000000,149975.000000,41.310884)}
{pt3dadd(154164.000000,158592.000000,150625.000000,17.761838)}
{pt3dadd(153912.000000,158160.000000,151300.000000,17.761838)}
{pt3dadd(153972.000000,157272.000000,151975.000000,17.761838)}
{pt3dadd(154104.000000,156528.000000,152650.000000,28.963115)}
{pt3dadd(154548.000000,156084.000000,153275.000000,12.701277)}
{pt3dadd(154740.000000,155304.000000,154125.000000,12.701277)}
{pt3dadd(155160.000000,154596.000000,154975.000000,12.701277)}
{pt3dadd(155472.000000,153708.000000,155775.000000,28.963115)}
{pt3dadd(155760.000000,153420.000000,156550.000000,17.761838)}
{pt3dadd(156924.000000,153072.000000,157300.000000,17.761838)}
{pt3dadd(157428.000000,152580.000000,158125.000000,17.761838)}
{pt3dadd(157704.000000,151932.000000,158875.000000,34.023676)}
{pt3dadd(157980.000000,150972.000000,159700.000000,17.761838)}
{pt3dadd(158496.000000,150168.000000,160475.000000,17.761838)}
{pt3dadd(159276.000000,149388.000000,161150.000000,17.761838)}
{pt3dadd(159804.000000,148620.000000,161725.000000,33.361202)}
{pt3dadd(159864.000000,147960.000000,162525.000000,17.099364)}
{pt3dadd(160332.000000,147108.000000,163300.000000,17.099364)}
{pt3dadd(160836.000000,145752.000000,164275.000000,17.099364)}
{pt3dadd(161112.000000,144840.000000,165075.000000,36.673569)}
{pt3dadd(161472.000000,144288.000000,165825.000000,21.074205)}
{pt3dadd(162264.000000,143220.000000,166625.000000,21.074205)}
{pt3dadd(162564.000000,142848.000000,167300.000000,21.074205)}
{pt3dadd(163548.000000,142476.000000,168175.000000,43.669290)}
{pt3dadd(163440.000000,142020.000000,169075.000000,24.095085)}
{pt3dadd(163752.000000,141204.000000,169950.000000,24.095085)}
{pt3dadd(163908.000000,140520.000000,170650.000000,24.095085)}
{pt3dadd(164100.000000,139596.000000,171550.000000,52.413941)}
{pt3dadd(164040.000000,139044.000000,172400.000000,29.818856)}
{pt3dadd(164112.000000,138432.000000,173225.000000,29.818856)}
{pt3dadd(164160.000000,137772.000000,174250.000000,29.818856)}
{pt3dadd(163596.000000,137160.000000,175400.000000,62.487784)}
{pt3dadd(163692.000000,136476.000000,176275.000000,34.168928)}
{pt3dadd(163776.000000,136524.000000,177100.000000,34.168928)}
{pt3dadd(163668.000000,135840.000000,177925.000000,34.168928)}
{pt3dadd(163440.000000,135432.000000,178525.000000,57.717974)}
{pt3dadd(163560.000000,135060.000000,179425.000000,25.049046)}
{pt3dadd(163416.000000,134436.000000,180325.000000,25.049046)}
{pt3dadd(163284.000000,133668.000000,181025.000000,59.091672)}
{pt3dadd(163140.000000,133152.000000,181875.000000,258.791672)}
{pt3dadd(162888.000000,132720.000000,182675.000000,391.071043)}
{pt3dadd(162840.000000,132660.000000,182850.000000,1000.000000)}

{create adhoc11}
{access adhoc11}
{connect adhoc11(1), adhoc9(0)}
{nseg = 1}
{strdef color color = "White"}
{pt3dclear()}
{pt3dadd(185748.000000,202440.000000,83200.000000,69.007660)}
{pt3dadd(186252.000000,201552.000000,82350.000000,42.671349)}
{pt3dadd(186300.000000,201144.000000,81725.000000,26.202809)}
{pt3dadd(186360.000000,200736.000000,80975.000000,21.602299)}
{pt3dadd(186552.000000,200376.000000,80450.000000,10.401022)}
{pt3dadd(186636.000000,199944.000000,79900.000000,10.401022)}
{pt3dadd(186552.000000,199404.000000,79250.000000,10.401022)}
{pt3dadd(186456.000000,198936.000000,78625.000000,23.902554)}
{pt3dadd(186456.000000,198048.000000,78050.000000,27.951002)}
{pt3dadd(186312.000000,197736.000000,77500.000000,41.452534)}
{pt3dadd(186396.000000,197376.000000,77000.000000,68.087557)}
{pt3dadd(186516.000000,197244.000000,77200.000000,69.007660)}

{create adhoc12}
{access adhoc12}
{connect adhoc12(1), adhoc11(0)}
{nseg = 1}
{strdef color color = "White"}
{pt3dclear()}
{pt3dadd(186516.000000,197244.000000,77200.000000,69.007660)}
{pt3dadd(183996.000000,197232.000000,77825.000000,27.960602)}
{pt3dadd(183840.000000,197364.000000,78150.000000,17.376361)}
{pt3dadd(183768.000000,197424.000000,78775.000000,7.426584)}
{pt3dadd(183864.000000,197352.000000,79125.000000,5.051754)}
{pt3dadd(184092.000000,197292.000000,79400.000000,5.051754)}
{pt3dadd(184620.000000,196944.000000,79875.000000,5.051754)}
{pt3dadd(184860.000000,196920.000000,80200.000000,6.041699)}
{pt3dadd(185424.000000,197088.000000,80400.000000,3.737879)}
{pt3dadd(185616.000000,197148.000000,80625.000000,5.229798)}
{pt3dadd(185880.000000,197112.000000,80950.000000,7.739669)}

{create adhoc13}
{access adhoc13}
{connect adhoc13(1), adhoc11(0)}
{nseg = 1}
{strdef color color = "White"}
{pt3dclear()}
{pt3dadd(186516.000000,197244.000000,77200.000000,69.007660)}
{pt3dadd(186600.000000,196848.000000,76825.000000,46.505107)}
{pt3dadd(186468.000000,196464.000000,76650.000000,28.503064)}
{pt3dadd(186624.000000,196116.000000,76375.000000,31.263370)}
{pt3dadd(186828.000000,195744.000000,76300.000000,34.023676)}
{pt3dadd(186912.000000,195480.000000,76275.000000,55.706127)}
{pt3dadd(186912.000000,195120.000000,76150.000000,82.809190)}

{create adhoc14}
{access adhoc14}
{connect adhoc14(1), adhoc13(0)}
{nseg = 1}
{strdef color color = "White"}
{pt3dclear()}
{pt3dadd(186912.000000,195120.000000,76150.000000,82.809190)}
{pt3dadd(185052.000000,195252.000000,76025.000000,32.561112)}
{pt3dadd(184824.000000,195216.000000,76075.000000,20.136667)}
{pt3dadd(184584.000000,195228.000000,75975.000000,5.803854)}
{pt3dadd(184260.000000,195384.000000,75850.000000,4.676958)}
{pt3dadd(184068.000000,195336.000000,75700.000000,6.794931)}
{pt3dadd(183924.000000,195420.000000,75700.000000,7.739669)}

{create adhoc15}
{access adhoc15}
{connect adhoc15(1), adhoc13(0)}
{nseg = 1}
{strdef color color = "White"}
{pt3dclear()}
{pt3dadd(186912.000000,195120.000000,76150.000000,82.809190)}
{pt3dadd(187308.000000,194640.000000,75775.000000,55.706127)}
{pt3dadd(187812.000000,193728.000000,75350.000000,34.023676)}
{pt3dadd(188076.000000,193404.000000,75200.000000,31.263370)}
{pt3dadd(188280.000000,193140.000000,75000.000000,15.001532)}
{pt3dadd(188592.000000,192780.000000,75000.000000,15.001532)}
{pt3dadd(188604.000000,192336.000000,74650.000000,15.001532)}
{pt3dadd(188808.000000,191952.000000,74650.000000,31.263370)}
{pt3dadd(188856.000000,191580.000000,74575.000000,17.761838)}
{pt3dadd(189012.000000,191124.000000,74600.000000,17.761838)}
{pt3dadd(189036.000000,190680.000000,74450.000000,17.761838)}
{pt3dadd(189300.000000,190104.000000,74400.000000,33.361202)}
{pt3dadd(189360.000000,189600.000000,74100.000000,30.048834)}
{pt3dadd(189540.000000,189264.000000,74025.000000,42.998304)}
{pt3dadd(189564.000000,189036.000000,73800.000000,70.663840)}
{pt3dadd(189564.000000,188772.000000,73825.000000,66.247350)}

{create adhoc16}
{access adhoc16}
{connect adhoc16(1), adhoc15(0)}
{nseg = 1}
{strdef color color = "White"}
{pt3dclear()}
{pt3dadd(189564.000000,188772.000000,73825.000000,66.247350)}
{pt3dadd(187296.000000,188880.000000,72075.000000,25.678317)}
{pt3dadd(187344.000000,188484.000000,71800.000000,16.006990)}
{pt3dadd(187008.000000,188448.000000,71500.000000,7.379626)}
{pt3dadd(186708.000000,188472.000000,71125.000000,7.379626)}
{pt3dadd(186432.000000,188532.000000,71225.000000,11.299376)}
{pt3dadd(186096.000000,188580.000000,71100.000000,9.287602)}

{create adhoc17}
{access adhoc17}
{connect adhoc17(1), adhoc15(0)}
{nseg = 1}
{strdef color color = "White"}
{pt3dclear()}
{pt3dadd(189564.000000,188772.000000,73825.000000,66.247350)}
{pt3dadd(189960.000000,188412.000000,74175.000000,45.585003)}
{pt3dadd(190008.000000,188172.000000,74425.000000,27.951002)}
{pt3dadd(189900.000000,187860.000000,74425.000000,28.503064)}
{pt3dadd(189948.000000,187536.000000,74700.000000,28.503064)}
{pt3dadd(189912.000000,187140.000000,74625.000000,46.505107)}
{pt3dadd(189840.000000,186972.000000,74575.000000,69.007660)}

{create adhoc18}
{access adhoc18}
{connect adhoc18(1), adhoc17(0)}
{nseg = 1}
{strdef color color = "White"}
{pt3dclear()}
{pt3dadd(189840.000000,186972.000000,74575.000000,69.007660)}
{pt3dadd(188724.000000,187116.000000,74125.000000,27.960602)}
{pt3dadd(188316.000000,186816.000000,74150.000000,17.376361)}
{pt3dadd(187968.000000,186564.000000,73850.000000,6.249659)}
{pt3dadd(188100.000000,186312.000000,73700.000000,3.874829)}
{pt3dadd(188124.000000,186132.000000,73525.000000,3.874829)}
{pt3dadd(187884.000000,185892.000000,72975.000000,3.874829)}
{pt3dadd(187932.000000,185784.000000,72550.000000,5.122763)}
{pt3dadd(187896.000000,185196.000000,72175.000000,2.747934)}
{pt3dadd(187476.000000,185016.000000,72000.000000,2.747934)}
{pt3dadd(187116.000000,184884.000000,71800.000000,2.747934)}
{pt3dadd(186984.000000,184752.000000,71500.000000,3.995868)}
{pt3dadd(186768.000000,184764.000000,71300.000000,3.737879)}
{pt3dadd(186528.000000,184560.000000,70975.000000,4.727823)}
{pt3dadd(186804.000000,184428.000000,70775.000000,6.879706)}
{pt3dadd(186888.000000,184452.000000,70500.000000,6.449724)}

{create adhoc19}
{access adhoc19}
{connect adhoc19(1), adhoc17(0)}
{nseg = 1}
{strdef color color = "White"}
{pt3dclear()}
{pt3dadd(189840.000000,186972.000000,74575.000000,69.007660)}
{pt3dadd(190608.000000,186636.000000,75200.000000,63.671068)}
{pt3dadd(191004.000000,186276.000000,75600.000000,59.070557)}
{pt3dadd(190968.000000,186180.000000,75525.000000,55.206127)}

{create adhoc20}
{access adhoc20}
{connect adhoc20(1), adhoc19(0)}
{nseg = 1}
{strdef color color = "White"}
{pt3dclear()}
{pt3dadd(190968.000000,186180.000000,75525.000000,55.206127)}
{pt3dadd(189564.000000,186372.000000,76900.000000,29.995096)}
{pt3dadd(189240.000000,186396.000000,78225.000000,18.597057)}
{pt3dadd(189552.000000,186396.000000,79400.000000,12.177937)}
{pt3dadd(189660.000000,186192.000000,79725.000000,10.144211)}
{pt3dadd(190008.000000,186024.000000,80100.000000,15.390737)}
{pt3dadd(190404.000000,185892.000000,80500.000000,24.651229)}
{pt3dadd(190680.000000,185640.000000,80925.000000,27.732632)}

{create adhoc21}
{access adhoc21}
{connect adhoc21(1), adhoc20(0)}
{nseg = 1}
{strdef color color = "White"}
{pt3dclear()}
{pt3dadd(190680.000000,185640.000000,80925.000000,27.732632)}
{pt3dadd(191844.000000,184692.000000,80750.000000,12.840078)}
{pt3dadd(191940.000000,184524.000000,80525.000000,8.304047)}
{pt3dadd(192240.000000,184236.000000,80400.000000,4.986545)}
{pt3dadd(192300.000000,184008.000000,80400.000000,3.429025)}
{pt3dadd(192564.000000,183756.000000,80300.000000,3.429025)}
{pt3dadd(192696.000000,183528.000000,80300.000000,3.429025)}
{pt3dadd(192828.000000,183324.000000,80300.000000,4.986545)}
{pt3dadd(193056.000000,183060.000000,80200.000000,3.057520)}
{pt3dadd(193140.000000,182832.000000,80125.000000,3.057520)}
{pt3dadd(193188.000000,182628.000000,80125.000000,3.057520)}
{pt3dadd(193164.000000,182436.000000,80125.000000,4.615041)}
{pt3dadd(193188.000000,182220.000000,80125.000000,4.615041)}
{pt3dadd(193344.000000,181980.000000,80175.000000,6.172561)}
{pt3dadd(194040.000000,181788.000000,81150.000000,9.287602)}
{pt3dadd(194172.000000,181596.000000,81100.000000,9.287602)}

{create adhoc22}
{access adhoc22}
{connect adhoc22(1), adhoc20(0)}
{nseg = 1}
{strdef color color = "White"}
{pt3dclear()}
{pt3dadd(190680.000000,185640.000000,80925.000000,27.732632)}
{pt3dadd(190728.000000,185472.000000,81250.000000,20.837264)}
{pt3dadd(190920.000000,185328.000000,81750.000000,20.723714)}
{pt3dadd(191196.000000,185376.000000,82200.000000,14.202260)}
{pt3dadd(191124.000000,185616.000000,82625.000000,13.374147)}

{create adhoc23}
{access adhoc23}
{connect adhoc23(1), adhoc22(0)}
{nseg = 1}
{strdef color color = "White"}
{pt3dclear()}
{pt3dadd(191124.000000,185616.000000,82625.000000,13.374147)}
{pt3dadd(191088.000000,186756.000000,82825.000000,7.537939)}
{pt3dadd(191088.000000,186960.000000,82850.000000,5.122763)}
{pt3dadd(191148.000000,187176.000000,82975.000000,3.522888)}
{pt3dadd(191160.000000,187320.000000,83025.000000,3.049908)}
{pt3dadd(191760.000000,187764.000000,83300.000000,4.083180)}
{pt3dadd(191856.000000,187728.000000,83500.000000,5.374770)}

{create adhoc24}
{access adhoc24}
{connect adhoc24(1), adhoc22(0)}
{nseg = 1}
{strdef color color = "White"}
{pt3dclear()}
{pt3dadd(191124.000000,185616.000000,82625.000000,13.374147)}
{pt3dadd(192228.000000,184776.000000,83025.000000,10.093721)}
{pt3dadd(192480.000000,184692.000000,83000.000000,6.656233)}
{pt3dadd(192660.000000,183912.000000,83225.000000,6.656233)}
{pt3dadd(192840.000000,183132.000000,83275.000000,3.874829)}
{pt3dadd(193176.000000,182172.000000,83850.000000,3.874829)}
{pt3dadd(193200.000000,181920.000000,84075.000000,3.874829)}
{pt3dadd(193260.000000,181716.000000,84200.000000,6.142666)}
{pt3dadd(193344.000000,181524.000000,84425.000000,3.767836)}
{pt3dadd(193404.000000,181320.000000,84425.000000,5.325357)}
{pt3dadd(194076.000000,181044.000000,84550.000000,6.882877)}
{pt3dadd(194244.000000,180876.000000,84675.000000,6.691735)}
{pt3dadd(194220.000000,180780.000000,84750.000000,9.287602)}

{create adhoc25}
{access adhoc25}
{connect adhoc25(1), adhoc19(0)}
{nseg = 1}
{strdef color color = "White"}
{pt3dclear()}
{pt3dadd(190968.000000,186180.000000,75525.000000,55.206127)}
{pt3dadd(191388.000000,185760.000000,75600.000000,37.304085)}
{pt3dadd(191856.000000,185412.000000,75525.000000,22.982451)}
{pt3dadd(192192.000000,185088.000000,75325.000000,23.442503)}
{pt3dadd(192456.000000,184740.000000,75450.000000,12.701277)}
{pt3dadd(192720.000000,184380.000000,75600.000000,12.701277)}
{pt3dadd(192888.000000,183936.000000,75700.000000,12.701277)}
{pt3dadd(193044.000000,183516.000000,75675.000000,26.202809)}
{pt3dadd(193464.000000,183000.000000,75600.000000,27.951002)}
{pt3dadd(193740.000000,182484.000000,75575.000000,45.585003)}
{pt3dadd(193896.000000,182244.000000,75625.000000,66.247350)}

{create adhoc26}
{access adhoc26}
{connect adhoc26(1), adhoc25(0)}
{nseg = 1}
{strdef color color = "White"}
{pt3dclear()}
{pt3dadd(193896.000000,182244.000000,75625.000000,66.247350)}
{pt3dadd(191856.000000,182088.000000,73875.000000,27.732632)}

{create adhoc27}
{access adhoc27}
{connect adhoc27(1), adhoc26(0)}
{nseg = 1}
{strdef color color = "White"}
{pt3dclear()}
{pt3dadd(191856.000000,182088.000000,73875.000000,27.732632)}
{pt3dadd(191940.000000,182076.000000,72950.000000,18.988421)}
{pt3dadd(191880.000000,181644.000000,72400.000000,11.993053)}
{pt3dadd(191772.000000,181464.000000,71900.000000,13.102358)}
{pt3dadd(191532.000000,181020.000000,71525.000000,13.102358)}
{pt3dadd(191508.000000,180816.000000,71075.000000,20.789356)}
{pt3dadd(191460.000000,180444.000000,69375.000000,33.648927)}
{pt3dadd(190980.000000,180324.000000,69100.000000,39.934990)}

{create adhoc28}
{access adhoc28}
{connect adhoc28(1), adhoc27(0)}
{nseg = 1}
{strdef color color = "White"}
{pt3dclear()}
{pt3dadd(190980.000000,180324.000000,69100.000000,39.934990)}
{pt3dadd(189756.000000,178800.000000,68350.000000,16.907531)}
{pt3dadd(189696.000000,178632.000000,68525.000000,12.724408)}
{pt3dadd(189780.000000,178332.000000,68600.000000,4.799816)}
{pt3dadd(189804.000000,178236.000000,68575.000000,6.449724)}

{create adhoc29}
{access adhoc29}
{connect adhoc29(1), adhoc27(0)}
{nseg = 1}
{strdef color color = "White"}
{pt3dclear()}
{pt3dadd(190980.000000,180324.000000,69100.000000,39.934990)}
{pt3dadd(190668.000000,180288.000000,68650.000000,32.213707)}
{pt3dadd(190644.000000,180444.000000,68100.000000,19.928224)}
{pt3dadd(190404.000000,180600.000000,67600.000000,17.487752)}
{pt3dadd(190116.000000,180756.000000,67100.000000,6.746526)}
{pt3dadd(189636.000000,180744.000000,66500.000000,6.746526)}
{pt3dadd(189132.000000,180792.000000,66075.000000,6.746526)}
{pt3dadd(188436.000000,181428.000000,65650.000000,13.102358)}
{pt3dadd(187992.000000,181608.000000,65200.000000,13.102358)}
{pt3dadd(187548.000000,181692.000000,64775.000000,19.191957)}
{pt3dadd(187116.000000,181992.000000,64350.000000,30.986595)}
{pt3dadd(186576.000000,182172.000000,63900.000000,31.947992)}

{create adhoc30}
{access adhoc30}
{connect adhoc30(1), adhoc29(0)}
{nseg = 1}
{strdef color color = "White"}
{pt3dclear()}
{pt3dadd(186576.000000,182172.000000,63900.000000,31.947992)}
{pt3dadd(185664.000000,182772.000000,64275.000000,15.607380)}
{pt3dadd(185424.000000,182964.000000,64825.000000,9.964428)}
{pt3dadd(185244.000000,183120.000000,65275.000000,5.803854)}
{pt3dadd(184968.000000,183396.000000,65725.000000,4.418969)}
{pt3dadd(184752.000000,183696.000000,66150.000000,6.364949)}
{pt3dadd(184920.000000,184224.000000,66425.000000,6.449724)}

{create adhoc31}
{access adhoc31}
{connect adhoc31(1), adhoc29(0)}
{nseg = 1}
{strdef color color = "White"}
{pt3dclear()}
{pt3dadd(186576.000000,182172.000000,63900.000000,31.947992)}
{pt3dadd(186468.000000,182148.000000,63475.000000,24.460994)}
{pt3dadd(186564.000000,182304.000000,63100.000000,15.276596)}
{pt3dadd(186240.000000,182208.000000,62650.000000,13.509103)}
{pt3dadd(186036.000000,182148.000000,62225.000000,5.822105)}
{pt3dadd(185832.000000,182124.000000,61850.000000,5.822105)}
{pt3dadd(185652.000000,182028.000000,61475.000000,5.822105)}
{pt3dadd(185448.000000,181992.000000,61125.000000,7.751130)}
{pt3dadd(185088.000000,181860.000000,60725.000000,4.418969)}
{pt3dadd(184068.000000,181788.000000,59750.000000,6.364949)}
{pt3dadd(184044.000000,181692.000000,59550.000000,6.449724)}

{create adhoc32}
{access adhoc32}
{connect adhoc32(1), adhoc26(0)}
{nseg = 1}
{strdef color color = "White"}
{pt3dclear()}
{pt3dadd(191856.000000,182088.000000,73875.000000,27.732632)}
{pt3dadd(190788.000000,181896.000000,73600.000000,12.840078)}
{pt3dadd(190812.000000,181632.000000,73550.000000,9.674796)}
{pt3dadd(191052.000000,181284.000000,73525.000000,3.784582)}
{pt3dadd(191100.000000,181188.000000,73500.000000,5.374770)}

{create adhoc33}
{access adhoc33}
{connect adhoc33(1), adhoc25(0)}
{nseg = 1}
{strdef color color = "White"}
{pt3dclear()}
{pt3dadd(193896.000000,182244.000000,75625.000000,66.247350)}
{pt3dadd(194400.000000,181632.000000,75675.000000,41.751245)}
{pt3dadd(195036.000000,181236.000000,75625.000000,25.650747)}
{pt3dadd(195084.000000,180876.000000,75475.000000,26.202809)}
{pt3dadd(195384.000000,180552.000000,75325.000000,15.001532)}
{pt3dadd(195840.000000,180240.000000,75175.000000,15.001532)}
{pt3dadd(195888.000000,179868.000000,75125.000000,27.951002)}
{pt3dadd(195900.000000,179448.000000,75150.000000,43.550367)}
{pt3dadd(195948.000000,179064.000000,75150.000000,49.081392)}
{pt3dadd(195996.000000,178980.000000,75175.000000,79.496826)}

{create adhoc34}
{access adhoc34}
{connect adhoc34(1), adhoc33(0)}
{nseg = 1}
{strdef color color = "White"}
{pt3dclear()}
{pt3dadd(195996.000000,178980.000000,75175.000000,79.496826)}
{pt3dadd(193752.000000,178848.000000,76175.000000,30.094809)}
{pt3dadd(192120.000000,178740.000000,76175.000000,18.656886)}
{pt3dadd(191892.000000,178644.000000,76025.000000,4.615041)}
{pt3dadd(191628.000000,178584.000000,75800.000000,3.057520)}
{pt3dadd(191412.000000,178740.000000,75725.000000,4.047465)}
{pt3dadd(191208.000000,178740.000000,75700.000000,5.295399)}
{pt3dadd(191016.000000,178788.000000,75700.000000,5.229798)}
{pt3dadd(190464.000000,179016.000000,75350.000000,7.739669)}

{create adhoc35}
{access adhoc35}
{connect adhoc35(1), adhoc33(0)}
{nseg = 1}
{strdef color color = "White"}
{pt3dclear()}
{pt3dadd(195996.000000,178980.000000,75175.000000,79.496826)}
{pt3dadd(196296.000000,178572.000000,75050.000000,53.497884)}
{pt3dadd(196320.000000,178188.000000,74900.000000,32.698730)}
{pt3dadd(196596.000000,177864.000000,74850.000000,30.600897)}
{pt3dadd(196620.000000,177600.000000,74725.000000,15.001532)}
{pt3dadd(196932.000000,177348.000000,74775.000000,15.001532)}
{pt3dadd(197196.000000,176976.000000,74675.000000,15.001532)}
{pt3dadd(197424.000000,176652.000000,74725.000000,28.503064)}
{pt3dadd(197508.000000,176292.000000,74675.000000,15.001532)}
{pt3dadd(197592.000000,175956.000000,74700.000000,15.001532)}
{pt3dadd(197496.000000,175620.000000,74550.000000,15.001532)}
{pt3dadd(197496.000000,175284.000000,74425.000000,28.503064)}
{pt3dadd(197496.000000,174912.000000,74325.000000,15.001532)}
{pt3dadd(197472.000000,174576.000000,74225.000000,15.001532)}
{pt3dadd(197304.000000,174324.000000,73875.000000,15.001532)}
{pt3dadd(197328.000000,174048.000000,73850.000000,24.285930)}
{pt3dadd(197340.000000,173760.000000,73850.000000,20.068796)}
{pt3dadd(197340.000000,173424.000000,73850.000000,32.447993)}
{pt3dadd(197268.000000,173232.000000,73550.000000,47.921990)}

{create adhoc36}
{access adhoc36}
{connect adhoc36(1), adhoc35(0)}
{nseg = 1}
{strdef color color = "White"}
{pt3dclear()}
{pt3dadd(197268.000000,173232.000000,73550.000000,47.921990)}
{pt3dadd(197628.000000,173232.000000,76000.000000,27.743246)}
{pt3dadd(197352.000000,172980.000000,76400.000000,15.484291)}
{pt3dadd(197028.000000,172764.000000,76625.000000,11.145123)}

{create adhoc37}
{access adhoc37}
{connect adhoc37(1), adhoc36(0)}
{nseg = 1}
{strdef color color = "White"}
{pt3dclear()}
{pt3dadd(197028.000000,172764.000000,76625.000000,11.145123)}
{pt3dadd(197424.000000,172584.000000,76900.000000,6.364949)}
{pt3dadd(197580.000000,172404.000000,77125.000000,4.418969)}
{pt3dadd(197472.000000,172164.000000,77375.000000,6.812050)}
{pt3dadd(197532.000000,171960.000000,77425.000000,5.822105)}
{pt3dadd(197532.000000,171816.000000,77550.000000,5.822105)}
{pt3dadd(197496.000000,171588.000000,77850.000000,5.822105)}
{pt3dadd(197544.000000,171288.000000,78675.000000,9.219790)}
{pt3dadd(196140.000000,171264.000000,80000.000000,4.897684)}
{pt3dadd(196188.000000,171576.000000,80425.000000,4.897684)}
{pt3dadd(195900.000000,171732.000000,80825.000000,4.897684)}
{pt3dadd(195192.000000,172608.000000,81450.000000,6.826709)}
{pt3dadd(194976.000000,173304.000000,81650.000000,3.429025)}
{pt3dadd(194748.000000,173868.000000,81675.000000,3.429025)}
{pt3dadd(194472.000000,174300.000000,81750.000000,3.429025)}
{pt3dadd(194196.000000,174636.000000,81625.000000,5.803854)}
{pt3dadd(193932.000000,175140.000000,81625.000000,5.122763)}
{pt3dadd(193572.000000,175836.000000,81625.000000,7.537939)}
{pt3dadd(193584.000000,176064.000000,82000.000000,7.739669)}

{create adhoc38}
{access adhoc38}
{connect adhoc38(1), adhoc36(0)}
{nseg = 1}
{strdef color color = "White"}
{pt3dclear()}
{pt3dadd(197028.000000,172764.000000,76625.000000,11.145123)}
{pt3dadd(195660.000000,172536.000000,76825.000000,7.310908)}
{pt3dadd(195420.000000,172344.000000,77000.000000,6.830274)}
{pt3dadd(195480.000000,172152.000000,77250.000000,4.572881)}
{pt3dadd(195504.000000,172080.000000,77300.000000,4.478975)}

{create adhoc39}
{access adhoc39}
{connect adhoc39(1), adhoc35(0)}
{nseg = 1}
{strdef color color = "White"}
{pt3dclear()}
{pt3dadd(197268.000000,173232.000000,73550.000000,47.921990)}
{pt3dadd(197016.000000,172992.000000,73475.000000,35.642792)}
{pt3dadd(197172.000000,172692.000000,73325.000000,21.985675)}
{pt3dadd(197004.000000,172332.000000,73075.000000,25.650749)}
{pt3dadd(196872.000000,172008.000000,73000.000000,27.951004)}
{pt3dadd(196848.000000,171660.000000,72850.000000,45.585007)}
{pt3dadd(196812.000000,171480.000000,72700.000000,69.007660)}

{create adhoc40}
{access adhoc40}
{connect adhoc40(1), adhoc39(0)}
{nseg = 1}
{strdef color color = "White"}
{pt3dclear()}
{pt3dadd(196812.000000,171480.000000,72700.000000,69.007660)}
{pt3dadd(193512.000000,171420.000000,73050.000000,27.960602)}
{pt3dadd(193248.000000,171648.000000,73375.000000,17.376361)}
{pt3dadd(192972.000000,171744.000000,73475.000000,6.249659)}
{pt3dadd(192948.000000,172032.000000,73825.000000,3.874829)}
{pt3dadd(192948.000000,172260.000000,74050.000000,3.874829)}
{pt3dadd(192816.000000,172440.000000,74475.000000,3.874829)}
{pt3dadd(192612.000000,172644.000000,74675.000000,6.249659)}
{pt3dadd(192576.000000,173064.000000,75175.000000,3.874829)}
{pt3dadd(192552.000000,173700.000000,75625.000000,3.874829)}
{pt3dadd(192732.000000,173928.000000,76000.000000,3.874829)}
{pt3dadd(193140.000000,174192.000000,76425.000000,6.249659)}
{pt3dadd(193452.000000,174432.000000,76825.000000,3.874829)}
{pt3dadd(193884.000000,174528.000000,77225.000000,3.874829)}
{pt3dadd(194004.000000,174648.000000,77475.000000,3.874829)}
{pt3dadd(194400.000000,174912.000000,77650.000000,5.803854)}
{pt3dadd(194904.000000,175248.000000,77875.000000,5.803854)}
{pt3dadd(195324.000000,175704.000000,78125.000000,8.673090)}
{pt3dadd(195300.000000,175704.000000,78300.000000,13.374147)}

{create adhoc41}
{access adhoc41}
{connect adhoc41(1), adhoc39(0)}
{nseg = 1}
{strdef color color = "White"}
{pt3dclear()}
{pt3dadd(196812.000000,171480.000000,72700.000000,69.007660)}
{pt3dadd(196740.000000,171144.000000,72725.000000,46.505107)}
{pt3dadd(196608.000000,170880.000000,72600.000000,55.506128)}
{pt3dadd(196572.000000,170556.000000,72500.000000,46.505107)}
{pt3dadd(196512.000000,170052.000000,72425.000000,69.007660)}

{create adhoc42}
{access adhoc42}
{connect adhoc42(1), adhoc41(0)}
{nseg = 1}
{strdef color color = "White"}
{pt3dclear()}
{pt3dadd(196512.000000,170052.000000,72425.000000,69.007660)}
{pt3dadd(194508.000000,170004.000000,70900.000000,27.960602)}
{pt3dadd(192612.000000,170004.000000,69625.000000,17.376361)}
{pt3dadd(192420.000000,169836.000000,69525.000000,6.784625)}
{pt3dadd(192216.000000,170064.000000,69375.000000,4.409795)}
{pt3dadd(192036.000000,170196.000000,69275.000000,4.409795)}
{pt3dadd(191808.000000,170652.000000,69225.000000,4.409795)}
{pt3dadd(191664.000000,170916.000000,69275.000000,7.961550)}
{pt3dadd(191040.000000,171864.000000,69275.000000,5.051754)}
{pt3dadd(190740.000000,171984.000000,68950.000000,5.051754)}
{pt3dadd(190500.000000,172044.000000,68550.000000,5.051754)}
{pt3dadd(190248.000000,172008.000000,68100.000000,6.609275)}
{pt3dadd(189996.000000,171876.000000,67800.000000,4.305454)}
{pt3dadd(189756.000000,172440.000000,67075.000000,6.175757)}
{pt3dadd(189384.000000,172944.000000,66725.000000,7.739669)}

{create adhoc43}
{access adhoc43}
{connect adhoc43(1), adhoc41(0)}
{nseg = 1}
{strdef color color = "White"}
{pt3dclear()}
{pt3dadd(196512.000000,170052.000000,72425.000000,69.007660)}
{pt3dadd(196608.000000,169584.000000,72550.000000,46.505107)}
{pt3dadd(196776.000000,169284.000000,72750.000000,28.503064)}
{pt3dadd(196776.000000,168972.000000,72800.000000,26.202809)}
{pt3dadd(196572.000000,168636.000000,72650.000000,12.701277)}
{pt3dadd(196464.000000,168360.000000,72525.000000,12.701277)}
{pt3dadd(196428.000000,168036.000000,72725.000000,23.902554)}
{pt3dadd(196296.000000,167676.000000,72750.000000,35.103832)}
{pt3dadd(196200.000000,167388.000000,72400.000000,38.837591)}
{pt3dadd(196176.000000,167220.000000,72525.000000,57.506386)}

{create adhoc44}
{access adhoc44}
{connect adhoc44(1), adhoc43(0)}
{nseg = 1}
{strdef color color = "White"}
{pt3dclear()}
{pt3dadd(196176.000000,167220.000000,72525.000000,57.506386)}
{pt3dadd(196404.000000,167076.000000,74825.000000,27.372304)}
{pt3dadd(196332.000000,166884.000000,75000.000000,26.664735)}
{pt3dadd(196332.000000,165468.000000,76250.000000,17.568921)}
{pt3dadd(196596.000000,165072.000000,76750.000000,31.947992)}

{create adhoc45}
{access adhoc45}
{connect adhoc45(1), adhoc44(0)}
{nseg = 1}
{strdef color color = "White"}
{pt3dclear()}
{pt3dadd(196596.000000,165072.000000,76750.000000,31.947992)}
{pt3dadd(196188.000000,164256.000000,76850.000000,13.299239)}
{pt3dadd(196308.000000,163548.000000,76775.000000,9.517890)}
{pt3dadd(196356.000000,162768.000000,76700.000000,4.418237)}
{pt3dadd(196440.000000,162504.000000,76625.000000,4.713820)}
{pt3dadd(196452.000000,162444.000000,76625.000000,6.449724)}

{create adhoc46}
{access adhoc46}
{connect adhoc46(1), adhoc44(0)}
{nseg = 1}
{strdef color color = "White"}
{pt3dclear()}
{pt3dadd(196596.000000,165072.000000,76750.000000,31.947992)}
{pt3dadd(196716.000000,165048.000000,77325.000000,18.852840)}
{pt3dadd(197220.000000,164940.000000,77900.000000,11.911704)}
{pt3dadd(197616.000000,164880.000000,78400.000000,11.911704)}
{pt3dadd(197844.000000,164988.000000,78925.000000,7.589598)}
{pt3dadd(198144.000000,165036.000000,79425.000000,7.589598)}
{pt3dadd(198156.000000,165180.000000,80050.000000,7.589598)}
{pt3dadd(198060.000000,165492.000000,80825.000000,11.911704)}
{pt3dadd(197748.000000,165660.000000,81200.000000,5.822105)}
{pt3dadd(197424.000000,165900.000000,81550.000000,5.822105)}
{pt3dadd(197184.000000,166152.000000,81950.000000,5.822105)}
{pt3dadd(196896.000000,166272.000000,82475.000000,9.219790)}
{pt3dadd(196764.000000,166200.000000,82900.000000,6.455205)}
{pt3dadd(196548.000000,165792.000000,83400.000000,9.758675)}
{pt3dadd(196452.000000,165840.000000,83700.000000,9.287602)}

{create adhoc47}
{access adhoc47}
{connect adhoc47(1), adhoc46(0)}
{nseg = 1}
{strdef color color = "White"}
{pt3dclear()}
{pt3dadd(196452.000000,165840.000000,83700.000000,9.287602)}
{pt3dadd(197028.000000,166224.000000,83850.000000,8.053916)}
{pt3dadd(197340.000000,166452.000000,84075.000000,5.432350)}
{pt3dadd(197388.000000,166560.000000,84350.000000,5.803854)}
{pt3dadd(197616.000000,166788.000000,84575.000000,3.429025)}
{pt3dadd(197628.000000,167016.000000,84800.000000,3.429025)}
{pt3dadd(197664.000000,167280.000000,84875.000000,3.429025)}
{pt3dadd(197448.000000,167460.000000,84925.000000,4.986545)}
{pt3dadd(197376.000000,167676.000000,85125.000000,4.047465)}
{pt3dadd(197376.000000,167868.000000,85150.000000,5.295399)}
{pt3dadd(197232.000000,168084.000000,85275.000000,7.825665)}
{pt3dadd(197100.000000,168264.000000,85375.000000,7.739669)}

{create adhoc48}
{access adhoc48}
{connect adhoc48(1), adhoc46(0)}
{nseg = 1}
{strdef color color = "White"}
{pt3dclear()}
{pt3dadd(196452.000000,165840.000000,83700.000000,9.287602)}
{pt3dadd(196284.000000,164880.000000,84075.000000,17.218967)}
{pt3dadd(196452.000000,164400.000000,84675.000000,17.838141)}
{pt3dadd(196500.000000,164124.000000,84875.000000,11.145123)}

{create adhoc49}
{access adhoc49}
{connect adhoc49(1), adhoc48(0)}
{nseg = 1}
{strdef color color = "White"}
{pt3dclear()}
{pt3dadd(196500.000000,164124.000000,84875.000000,11.145123)}
{pt3dadd(196392.000000,163548.000000,85075.000000,11.268957)}
{pt3dadd(196404.000000,163476.000000,85275.000000,9.287602)}

{create adhoc50}
{access adhoc50}
{connect adhoc50(1), adhoc48(0)}
{nseg = 1}
{strdef color color = "White"}
{pt3dclear()}
{pt3dadd(196500.000000,164124.000000,84875.000000,11.145123)}
{pt3dadd(197052.000000,164760.000000,85275.000000,7.781480)}
{pt3dadd(197280.000000,164892.000000,85600.000000,7.643718)}
{pt3dadd(197484.000000,165108.000000,85925.000000,6.962627)}
{pt3dadd(197712.000000,165228.000000,86400.000000,7.537939)}
{pt3dadd(197712.000000,165288.000000,86650.000000,7.739669)}

{create adhoc51}
{access adhoc51}
{connect adhoc51(1), adhoc43(0)}
{nseg = 1}
{strdef color color = "White"}
{pt3dclear()}
{pt3dadd(196176.000000,167220.000000,72525.000000,57.506386)}
{pt3dadd(196104.000000,166872.000000,72300.000000,38.837591)}
{pt3dadd(196188.000000,166560.000000,71875.000000,23.902554)}
{pt3dadd(196284.000000,166248.000000,71650.000000,26.202809)}
{pt3dadd(196368.000000,165972.000000,71450.000000,15.001532)}
{pt3dadd(196452.000000,165660.000000,71375.000000,15.001532)}
{pt3dadd(196392.000000,165336.000000,71375.000000,15.001532)}
{pt3dadd(196452.000000,164952.000000,71275.000000,30.600897)}
{pt3dadd(196512.000000,164676.000000,71175.000000,17.099365)}
{pt3dadd(196572.000000,164352.000000,71075.000000,17.099365)}
{pt3dadd(196668.000000,164088.000000,70950.000000,17.099365)}
{pt3dadd(196692.000000,163836.000000,70825.000000,32.698730)}
{pt3dadd(196716.000000,163584.000000,70700.000000,17.099365)}
{pt3dadd(196536.000000,163368.000000,70600.000000,17.099365)}
{pt3dadd(196464.000000,163092.000000,70550.000000,32.698730)}
{pt3dadd(196392.000000,162780.000000,70500.000000,48.960568)}
{pt3dadd(196296.000000,162444.000000,70325.000000,54.602005)}
{pt3dadd(196200.000000,162192.000000,70150.000000,82.809190)}

{create adhoc52}
{access adhoc52}
{connect adhoc52(1), adhoc51(0)}
{nseg = 1}
{strdef color color = "White"}
{pt3dclear()}
{pt3dadd(196200.000000,162192.000000,70150.000000,82.809190)}
{pt3dadd(195060.000000,162552.000000,72075.000000,32.561112)}
{pt3dadd(194148.000000,162348.000000,72200.000000,20.136667)}
{pt3dadd(194040.000000,162168.000000,72275.000000,5.803854)}
{pt3dadd(193908.000000,161976.000000,72300.000000,3.429025)}
{pt3dadd(193764.000000,161796.000000,72450.000000,3.429025)}
{pt3dadd(193764.000000,161604.000000,72725.000000,3.429025)}
{pt3dadd(193584.000000,161448.000000,72975.000000,4.676958)}
{pt3dadd(193560.000000,161376.000000,73025.000000,2.747934)}
{pt3dadd(193524.000000,161304.000000,73125.000000,3.995868)}
{pt3dadd(193536.000000,161112.000000,73100.000000,4.591663)}
{pt3dadd(193512.000000,160932.000000,72950.000000,4.572881)}
{pt3dadd(193476.000000,160752.000000,72875.000000,4.478975)}

{create adhoc53}
{access adhoc53}
{connect adhoc53(1), adhoc51(0)}
{nseg = 1}
{strdef color color = "White"}
{pt3dclear()}
{pt3dadd(196200.000000,162192.000000,70150.000000,82.809190)}
{pt3dadd(196500.000000,161628.000000,70500.000000,73.608170)}
{pt3dadd(196800.000000,161460.000000,70800.000000,69.007660)}

{create adhoc54}
{access adhoc54}
{connect adhoc54(1), adhoc53(0)}
{nseg = 1}
{strdef color color = "White"}
{pt3dclear()}
{pt3dadd(196800.000000,161460.000000,70800.000000,69.007660)}
{pt3dadd(197040.000000,161112.000000,71050.000000,43.039691)}
{pt3dadd(197160.000000,160836.000000,71225.000000,26.423814)}
{pt3dadd(197100.000000,160692.000000,71175.000000,24.123560)}
{pt3dadd(197064.000000,160308.000000,71200.000000,12.701277)}
{pt3dadd(197112.000000,160032.000000,71250.000000,12.701277)}
{pt3dadd(197124.000000,159768.000000,71350.000000,23.902554)}
{pt3dadd(197052.000000,159444.000000,71475.000000,33.186952)}
{pt3dadd(196956.000000,159192.000000,71575.000000,35.642792)}
{pt3dadd(196860.000000,158868.000000,71575.000000,47.921990)}

{create adhoc55}
{access adhoc55}
{connect adhoc55(1), adhoc54(0)}
{nseg = 1}
{strdef color color = "White"}
{pt3dclear()}
{pt3dadd(196860.000000,158868.000000,71575.000000,47.921990)}
{pt3dadd(196992.000000,158580.000000,71525.000000,31.809031)}
{pt3dadd(197004.000000,158232.000000,71475.000000,19.685419)}
{pt3dadd(197028.000000,157788.000000,71550.000000,21.602298)}
{pt3dadd(197052.000000,157416.000000,71675.000000,12.701277)}
{pt3dadd(197064.000000,157032.000000,71800.000000,12.701277)}
{pt3dadd(197064.000000,156756.000000,71875.000000,21.985675)}
{pt3dadd(196992.000000,156396.000000,71900.000000,30.886697)}
{pt3dadd(196932.000000,156120.000000,71825.000000,31.809033)}
{pt3dadd(197028.000000,155760.000000,71825.000000,46.005108)}

{create adhoc56}
{access adhoc56}
{connect adhoc56(1), adhoc55(0)}
{nseg = 1}
{strdef color color = "White"}
{pt3dclear()}
{pt3dadd(197028.000000,155760.000000,71825.000000,46.005108)}
{pt3dadd(197040.000000,155472.000000,71750.000000,31.809033)}
{pt3dadd(197064.000000,154944.000000,71950.000000,19.685420)}
{pt3dadd(196956.000000,154656.000000,72025.000000,20.068796)}
{pt3dadd(196788.000000,154428.000000,71950.000000,19.317380)}
{pt3dadd(196728.000000,153960.000000,71875.000000,28.601778)}
{pt3dadd(196884.000000,153624.000000,72025.000000,46.669630)}
{pt3dadd(197004.000000,153528.000000,72300.000000,47.921990)}

{create adhoc57}
{access adhoc57}
{connect adhoc57(1), adhoc56(0)}
{nseg = 1}
{strdef color color = "White"}
{pt3dclear()}
{pt3dadd(197004.000000,153528.000000,72300.000000,47.921990)}
{pt3dadd(196872.000000,153072.000000,72350.000000,47.921990)}
{pt3dadd(196896.000000,152652.000000,72350.000000,47.921990)}

{create adhoc58}
{access adhoc58}
{connect adhoc58(1), adhoc57(0)}
{nseg = 1}
{strdef color color = "White"}
{pt3dclear()}
{pt3dadd(196896.000000,152652.000000,72350.000000,47.921990)}
{pt3dadd(197124.000000,152292.000000,72575.000000,29.785660)}
{pt3dadd(197280.000000,151920.000000,72775.000000,18.471396)}
{pt3dadd(197304.000000,151668.000000,72825.000000,18.088020)}
{pt3dadd(197352.000000,151380.000000,72825.000000,10.401022)}
{pt3dadd(197352.000000,151104.000000,72800.000000,10.401022)}
{pt3dadd(197316.000000,150840.000000,72800.000000,10.401022)}
{pt3dadd(197280.000000,150528.000000,72800.000000,19.302045)}
{pt3dadd(197100.000000,150192.000000,72875.000000,10.401023)}
{pt3dadd(197064.000000,149796.000000,72875.000000,10.401023)}
{pt3dadd(196968.000000,149520.000000,72875.000000,10.401023)}
{pt3dadd(196860.000000,149196.000000,72800.000000,17.768542)}
{pt3dadd(196920.000000,148800.000000,72675.000000,8.867519)}
{pt3dadd(197076.000000,148524.000000,72650.000000,8.867519)}
{pt3dadd(197160.000000,148236.000000,72525.000000,8.867519)}
{pt3dadd(197220.000000,147972.000000,72475.000000,18.151917)}
{pt3dadd(197148.000000,147552.000000,72575.000000,10.784398)}
{pt3dadd(197112.000000,147144.000000,72550.000000,10.784398)}
{pt3dadd(197076.000000,146904.000000,72575.000000,10.784398)}
{pt3dadd(197016.000000,146628.000000,72600.000000,20.068796)}
{pt3dadd(197028.000000,146280.000000,72600.000000,10.784398)}
{pt3dadd(196992.000000,145872.000000,72625.000000,10.784398)}
{pt3dadd(197016.000000,145572.000000,72675.000000,10.784398)}
{pt3dadd(197040.000000,145164.000000,72725.000000,20.068796)}
{pt3dadd(197100.000000,144900.000000,72775.000000,20.068796)}
{pt3dadd(196992.000000,144612.000000,72900.000000,32.447993)}
{pt3dadd(196932.000000,144348.000000,72975.000000,47.921990)}

{create adhoc59}
{access adhoc59}
{connect adhoc59(1), adhoc58(0)}
{nseg = 1}
{strdef color color = "White"}
{pt3dclear()}
{pt3dadd(196932.000000,144348.000000,72975.000000,47.921990)}
{pt3dadd(197052.000000,144120.000000,73150.000000,44.007297)}
{pt3dadd(196956.000000,143952.000000,73000.000000,39.934990)}

{create adhoc60}
{access adhoc60}
{connect adhoc60(1), adhoc59(0)}
{nseg = 1}
{strdef color color = "White"}
{pt3dclear()}
{pt3dadd(196956.000000,143952.000000,73000.000000,39.934990)}
{pt3dadd(196968.000000,143592.000000,73100.000000,27.123327)}
{pt3dadd(197052.000000,143208.000000,73225.000000,32.247992)}
{pt3dadd(196992.000000,142944.000000,73075.000000,27.123327)}
{pt3dadd(197172.000000,142680.000000,73275.000000,39.934990)}

{create adhoc61}
{access adhoc61}
{connect adhoc61(1), adhoc60(0)}
{nseg = 1}
{strdef color color = "White"}
{pt3dclear()}
{pt3dadd(197172.000000,142680.000000,73275.000000,39.934990)}
{pt3dadd(197448.000000,142416.000000,73325.000000,27.123327)}
{pt3dadd(197616.000000,142140.000000,73500.000000,16.873996)}
{pt3dadd(197592.000000,141780.000000,73625.000000,20.388275)}
{pt3dadd(197676.000000,141456.000000,73725.000000,21.985675)}
{pt3dadd(197580.000000,141024.000000,74025.000000,31.270073)}
{pt3dadd(197484.000000,140820.000000,74325.000000,51.116789)}
{pt3dadd(197424.000000,140652.000000,74175.000000,47.921990)}

{create adhoc62}
{access adhoc62}
{connect adhoc62(1), adhoc61(0)}
{nseg = 1}
{strdef color color = "White"}
{pt3dclear()}
{pt3dadd(197424.000000,140652.000000,74175.000000,47.921990)}
{pt3dadd(197568.000000,140364.000000,74525.000000,29.253193)}
{pt3dadd(197580.000000,140064.000000,74475.000000,18.151916)}
{pt3dadd(197640.000000,139656.000000,74450.000000,14.957117)}
{pt3dadd(197688.000000,139308.000000,74500.000000,7.589599)}
{pt3dadd(197784.000000,138972.000000,74625.000000,7.589599)}
{pt3dadd(197844.000000,138636.000000,74750.000000,7.589599)}
{pt3dadd(197904.000000,138324.000000,74875.000000,16.873997)}
{pt3dadd(197928.000000,138060.000000,75000.000000,10.784398)}
{pt3dadd(197928.000000,137892.000000,75150.000000,10.784398)}
{pt3dadd(197796.000000,137640.000000,75300.000000,18.151917)}
{pt3dadd(197700.000000,137352.000000,75350.000000,25.519435)}
{pt3dadd(197556.000000,137052.000000,75400.000000,26.058394)}
{pt3dadd(197412.000000,136764.000000,75425.000000,38.337590)}

{create adhoc63}
{access adhoc63}
{connect adhoc63(1), adhoc62(0)}
{nseg = 1}
{strdef color color = "White"}
{pt3dclear()}
{pt3dadd(197412.000000,136764.000000,75425.000000,38.337590)}
{pt3dadd(197580.000000,136488.000000,75525.000000,24.372250)}
{pt3dadd(197664.000000,136212.000000,75675.000000,15.223350)}
{pt3dadd(197556.000000,135900.000000,75825.000000,14.211664)}
{pt3dadd(197412.000000,135660.000000,75875.000000,7.855832)}
{pt3dadd(197340.000000,135372.000000,75875.000000,7.855832)}
{pt3dadd(197340.000000,135036.000000,75875.000000,7.855832)}
{pt3dadd(197340.000000,134724.000000,75925.000000,14.211664)}
{pt3dadd(197352.000000,134388.000000,76075.000000,14.211664)}
{pt3dadd(197364.000000,134112.000000,76225.000000,21.898662)}
{pt3dadd(197376.000000,133884.000000,76375.000000,35.497770)}
{pt3dadd(197532.000000,133608.000000,76500.000000,39.934990)}

{create adhoc64}
{access adhoc64}
{connect adhoc64(1), adhoc63(0)}
{nseg = 1}
{strdef color color = "White"}
{pt3dclear()}
{pt3dadd(197532.000000,133608.000000,76500.000000,39.934990)}
{pt3dadd(197544.000000,133176.000000,76900.000000,45.259657)}
{pt3dadd(197508.000000,132924.000000,77125.000000,45.259657)}
{pt3dadd(197436.000000,132600.000000,77250.000000,39.934990)}

{create adhoc65}
{access adhoc65}
{connect adhoc65(1), adhoc64(0)}
{nseg = 1}
{strdef color color = "White"}
{pt3dclear()}
{pt3dadd(197436.000000,132600.000000,77250.000000,39.934990)}
{pt3dadd(197088.000000,132444.000000,76375.000000,23.055874)}
{pt3dadd(196860.000000,132228.000000,76175.000000,14.433524)}
{pt3dadd(196692.000000,131976.000000,76150.000000,9.656322)}
{pt3dadd(196596.000000,131784.000000,76050.000000,4.409795)}
{pt3dadd(196536.000000,131544.000000,76100.000000,4.409795)}
{pt3dadd(196320.000000,131304.000000,76000.000000,4.409795)}
{pt3dadd(196140.000000,131076.000000,75975.000000,8.731901)}
{pt3dadd(195960.000000,130800.000000,75950.000000,5.822105)}
{pt3dadd(195780.000000,130548.000000,75875.000000,5.822105)}
{pt3dadd(195744.000000,130320.000000,75800.000000,9.373860)}
{pt3dadd(195504.000000,130092.000000,75900.000000,12.925614)}
{pt3dadd(195336.000000,129864.000000,75950.000000,13.339181)}
{pt3dadd(195120.000000,129708.000000,75875.000000,19.258772)}

{create adhoc66}
{access adhoc66}
{connect adhoc66(1), adhoc65(0)}
{nseg = 1}
{strdef color color = "White"}
{pt3dclear()}
{pt3dadd(195120.000000,129708.000000,75875.000000,19.258772)}
{pt3dadd(195024.000000,129480.000000,75950.000000,12.269250)}
{pt3dadd(195036.000000,129288.000000,75950.000000,7.961550)}
{pt3dadd(194868.000000,129060.000000,75825.000000,9.434461)}
{pt3dadd(194796.000000,128784.000000,75850.000000,6.524665)}
{pt3dadd(194736.000000,128568.000000,75775.000000,6.524665)}
{pt3dadd(194736.000000,128304.000000,75825.000000,6.524665)}
{pt3dadd(194736.000000,128016.000000,75625.000000,10.076420)}
{pt3dadd(194700.000000,127716.000000,75550.000000,5.051754)}
{pt3dadd(194700.000000,127440.000000,75550.000000,5.051754)}
{pt3dadd(194604.000000,127200.000000,75450.000000,5.051754)}
{pt3dadd(194616.000000,126912.000000,75450.000000,10.298281)}
{pt3dadd(194544.000000,126672.000000,75350.000000,11.068632)}
{pt3dadd(194340.000000,126396.000000,75450.000000,15.205853)}
{pt3dadd(194280.000000,126144.000000,75400.000000,24.343088)}
{pt3dadd(194184.000000,126060.000000,75400.000000,22.186106)}

{create adhoc67}
{access adhoc67}
{connect adhoc67(1), adhoc66(0)}
{nseg = 1}
{strdef color color = "White"}
{pt3dclear()}
{pt3dadd(194184.000000,126060.000000,75400.000000,22.186106)}
{pt3dadd(194196.000000,125808.000000,75450.000000,15.598878)}
{pt3dadd(194124.000000,125568.000000,75325.000000,9.959327)}
{pt3dadd(194016.000000,125268.000000,75400.000000,9.373860)}
{pt3dadd(193908.000000,124956.000000,75425.000000,5.051754)}
{pt3dadd(193776.000000,124776.000000,75400.000000,5.051754)}
{pt3dadd(193716.000000,124596.000000,75450.000000,5.051754)}
{pt3dadd(193608.000000,124356.000000,75575.000000,8.603509)}
{pt3dadd(193572.000000,124140.000000,75550.000000,5.051754)}
{pt3dadd(193500.000000,123864.000000,75500.000000,5.051754)}
{pt3dadd(193260.000000,123672.000000,75500.000000,5.051754)}
{pt3dadd(193152.000000,123420.000000,75475.000000,9.373860)}
{pt3dadd(193128.000000,123192.000000,75525.000000,5.822105)}
{pt3dadd(192996.000000,122940.000000,75450.000000,5.822105)}
{pt3dadd(192816.000000,122688.000000,75475.000000,5.822105)}
{pt3dadd(192840.000000,122460.000000,75475.000000,9.373860)}
{pt3dadd(192732.000000,122220.000000,75450.000000,5.051754)}
{pt3dadd(192732.000000,121968.000000,75225.000000,5.051754)}
{pt3dadd(192552.000000,121716.000000,75150.000000,5.051754)}
{pt3dadd(192516.000000,121476.000000,75150.000000,10.298281)}
{pt3dadd(192420.000000,121212.000000,75125.000000,6.746526)}
{pt3dadd(192288.000000,120972.000000,75100.000000,6.746526)}
{pt3dadd(192228.000000,120744.000000,75050.000000,6.746526)}
{pt3dadd(192192.000000,120516.000000,75050.000000,9.656322)}
{pt3dadd(192048.000000,120192.000000,75025.000000,4.409795)}
{pt3dadd(191904.000000,119892.000000,74950.000000,4.409795)}
{pt3dadd(191844.000000,119604.000000,74950.000000,4.409795)}
{pt3dadd(191844.000000,119340.000000,74850.000000,7.807480)}
{pt3dadd(191772.000000,119028.000000,74900.000000,4.897684)}
{pt3dadd(191712.000000,118740.000000,74775.000000,9.219790)}
{pt3dadd(191568.000000,118524.000000,74525.000000,12.771544)}
{pt3dadd(191316.000000,118260.000000,74425.000000,14.623100)}
{pt3dadd(191280.000000,117972.000000,74300.000000,19.258772)}

{create adhoc68}
{access adhoc68}
{connect adhoc68(1), adhoc67(0)}
{nseg = 1}
{strdef color color = "White"}
{pt3dclear()}
{pt3dadd(191280.000000,117972.000000,74300.000000,19.258772)}
{pt3dadd(191400.000000,117732.000000,74000.000000,14.623100)}
{pt3dadd(191208.000000,117432.000000,73725.000000,18.018071)}
{pt3dadd(191004.000000,117168.000000,73275.000000,15.907018)}
{pt3dadd(190944.000000,116988.000000,73200.000000,23.110527)}

{create adhoc69}
{access adhoc69}
{connect adhoc69(1), adhoc68(0)}
{nseg = 1}
{strdef color color = "White"}
{pt3dclear()}
{pt3dadd(190944.000000,116988.000000,73200.000000,23.110527)}
{pt3dadd(190392.000000,116724.000000,72125.000000,13.374147)}

{create adhoc70}
{access adhoc70}
{connect adhoc70(1), adhoc69(0)}
{nseg = 1}
{strdef color color = "White"}
{pt3dclear()}
{pt3dadd(190392.000000,116724.000000,72125.000000,13.374147)}
{pt3dadd(189768.000000,116556.000000,71350.000000,10.707688)}
{pt3dadd(189816.000000,116400.000000,71200.000000,5.374770)}

{create adhoc71}
{access adhoc71}
{connect adhoc71(1), adhoc69(0)}
{nseg = 1}
{strdef color color = "White"}
{pt3dclear()}
{pt3dadd(190392.000000,116724.000000,72125.000000,13.374147)}
{pt3dadd(190656.000000,116532.000000,72825.000000,10.307708)}
{pt3dadd(190548.000000,116376.000000,72825.000000,6.784625)}
{pt3dadd(190512.000000,116184.000000,72750.000000,6.249659)}
{pt3dadd(190476.000000,115992.000000,72850.000000,3.339864)}
{pt3dadd(190380.000000,115728.000000,72750.000000,3.339864)}
{pt3dadd(190464.000000,115464.000000,72825.000000,3.339864)}
{pt3dadd(190488.000000,115248.000000,72800.000000,6.249659)}
{pt3dadd(190464.000000,114984.000000,72925.000000,4.409795)}
{pt3dadd(190356.000000,114756.000000,72850.000000,4.409795)}
{pt3dadd(190296.000000,114576.000000,72850.000000,4.409795)}
{pt3dadd(190164.000000,114348.000000,72875.000000,7.319591)}
{pt3dadd(190188.000000,114120.000000,73000.000000,4.409795)}
{pt3dadd(190164.000000,113892.000000,73150.000000,4.409795)}
{pt3dadd(190032.000000,113676.000000,73250.000000,4.409795)}
{pt3dadd(189756.000000,113460.000000,73325.000000,7.319591)}
{pt3dadd(189540.000000,113268.000000,73225.000000,4.409795)}
{pt3dadd(189360.000000,113052.000000,73025.000000,4.409795)}
{pt3dadd(189300.000000,112812.000000,73200.000000,4.409795)}
{pt3dadd(189120.000000,112560.000000,73225.000000,6.784625)}
{pt3dadd(189012.000000,112368.000000,73200.000000,3.874829)}
{pt3dadd(189072.000000,112188.000000,73225.000000,3.874829)}
{pt3dadd(189036.000000,112008.000000,73150.000000,3.874829)}
{pt3dadd(188976.000000,111840.000000,73125.000000,6.249659)}
{pt3dadd(188952.000000,111696.000000,73125.000000,3.874829)}
{pt3dadd(188856.000000,111468.000000,73175.000000,3.874829)}
{pt3dadd(188748.000000,111192.000000,73175.000000,5.714693)}
{pt3dadd(188868.000000,111000.000000,73375.000000,6.704638)}
{pt3dadd(188796.000000,110760.000000,73650.000000,6.216348)}
{pt3dadd(188628.000000,110496.000000,74150.000000,6.449724)}

{create adhoc72}
{access adhoc72}
{connect adhoc72(1), adhoc68(0)}
{nseg = 1}
{strdef color color = "White"}
{pt3dclear()}
{pt3dadd(190944.000000,116988.000000,73200.000000,23.110527)}
{pt3dadd(189828.000000,117180.000000,71225.000000,14.623100)}
{pt3dadd(189456.000000,117540.000000,70875.000000,9.373860)}
{pt3dadd(189468.000000,117756.000000,70675.000000,6.980779)}
{pt3dadd(189396.000000,118008.000000,70675.000000,3.429025)}
{pt3dadd(189444.000000,118296.000000,70650.000000,3.429025)}
{pt3dadd(189528.000000,118500.000000,70575.000000,3.429025)}
{pt3dadd(189552.000000,118740.000000,70550.000000,4.912244)}
{pt3dadd(189444.000000,118980.000000,70550.000000,2.983220)}
{pt3dadd(189456.000000,119220.000000,70350.000000,2.983220)}
{pt3dadd(189552.000000,119412.000000,70200.000000,2.983220)}
{pt3dadd(189552.000000,119652.000000,70200.000000,4.540740)}
{pt3dadd(189408.000000,119868.000000,70000.000000,3.057520)}
{pt3dadd(189300.000000,120084.000000,69925.000000,3.057520)}
{pt3dadd(189360.000000,120336.000000,70050.000000,3.057520)}
{pt3dadd(188916.000000,120588.000000,70100.000000,6.609275)}
{pt3dadd(188856.000000,120792.000000,70150.000000,5.051754)}
{pt3dadd(188916.000000,120996.000000,70150.000000,5.051754)}
{pt3dadd(189012.000000,121248.000000,70200.000000,5.051754)}
{pt3dadd(189072.000000,121248.000000,70225.000000,6.980779)}
{pt3dadd(189108.000000,121404.000000,70325.000000,4.986545)}
{pt3dadd(189036.000000,121632.000000,70400.000000,5.761499)}
{pt3dadd(189036.000000,121860.000000,70525.000000,8.602498)}
{pt3dadd(189012.000000,122040.000000,70600.000000,5.374770)}

{create adhoc73}
{access adhoc73}
{connect adhoc73(1), adhoc72(0)}
{nseg = 1}
{strdef color color = "White"}
{pt3dclear()}
{pt3dadd(189012.000000,122040.000000,70600.000000,5.374770)}
{pt3dadd(189348.000000,122148.000000,70350.000000,4.871480)}
{pt3dadd(189432.000000,122268.000000,70275.000000,3.522888)}
{pt3dadd(189552.000000,122508.000000,70125.000000,4.676958)}
{pt3dadd(189684.000000,122724.000000,69900.000000,3.429025)}
{pt3dadd(189708.000000,122928.000000,69850.000000,3.429025)}
{pt3dadd(189720.000000,123144.000000,69700.000000,4.160981)}
{pt3dadd(189744.000000,123324.000000,69725.000000,4.935935)}
{pt3dadd(189840.000000,123528.000000,69725.000000,4.011517)}
{pt3dadd(189936.000000,123732.000000,69625.000000,5.374770)}

{create adhoc74}
{access adhoc74}
{connect adhoc74(1), adhoc72(0)}
{nseg = 1}
{strdef color color = "White"}
{pt3dclear()}
{pt3dadd(189012.000000,122040.000000,70600.000000,5.374770)}
{pt3dadd(188760.000000,122136.000000,70800.000000,5.434490)}
{pt3dadd(188784.000000,122316.000000,71000.000000,5.135891)}
{pt3dadd(188796.000000,122424.000000,71025.000000,4.478975)}

{create adhoc75}
{access adhoc75}
{connect adhoc75(1), adhoc67(0)}
{nseg = 1}
{strdef color color = "White"}
{pt3dclear()}
{pt3dadd(191280.000000,117972.000000,74300.000000,19.258772)}
{pt3dadd(190668.000000,117828.000000,75000.000000,12.269250)}
{pt3dadd(190416.000000,117576.000000,75275.000000,11.116617)}
{pt3dadd(190272.000000,117588.000000,76400.000000,6.758446)}
{pt3dadd(190356.000000,117828.000000,76750.000000,6.449724)}

{create adhoc76}
{access adhoc76}
{connect adhoc76(1), adhoc66(0)}
{nseg = 1}
{strdef color color = "White"}
{pt3dclear()}
{pt3dadd(194184.000000,126060.000000,75400.000000,22.186106)}
{pt3dadd(193968.000000,126048.000000,76500.000000,12.125166)}
{pt3dadd(193884.000000,125880.000000,76800.000000,6.222789)}
{pt3dadd(193884.000000,125856.000000,76975.000000,4.478975)}

{create adhoc77}
{access adhoc77}
{connect adhoc77(1), adhoc65(0)}
{nseg = 1}
{strdef color color = "White"}
{pt3dclear()}
{pt3dadd(195120.000000,129708.000000,75875.000000,19.258772)}
{pt3dadd(194580.000000,129720.000000,76050.000000,8.711181)}
{pt3dadd(194436.000000,129648.000000,76225.000000,7.806598)}
{pt3dadd(193920.000000,129480.000000,76475.000000,4.799816)}
{pt3dadd(193596.000000,129204.000000,76825.000000,6.449724)}

{create adhoc78}
{access adhoc78}
{connect adhoc78(1), adhoc64(0)}
{nseg = 1}
{strdef color color = "White"}
{pt3dclear()}
{pt3dadd(197436.000000,132600.000000,77250.000000,39.934990)}
{pt3dadd(197796.000000,132480.000000,78350.000000,23.055874)}
{pt3dadd(197904.000000,132252.000000,78750.000000,14.433524)}
{pt3dadd(197916.000000,132012.000000,79000.000000,10.298281)}
{pt3dadd(198000.000000,131808.000000,79150.000000,5.051754)}
{pt3dadd(198048.000000,131592.000000,79300.000000,5.051754)}
{pt3dadd(198060.000000,131376.000000,79525.000000,5.051754)}
{pt3dadd(198144.000000,131220.000000,79675.000000,7.961550)}
{pt3dadd(197712.000000,128016.000000,79850.000000,4.409795)}
{pt3dadd(197652.000000,127824.000000,79875.000000,4.409795)}
{pt3dadd(197652.000000,127596.000000,80000.000000,4.409795)}
{pt3dadd(197616.000000,127344.000000,80050.000000,7.807480)}
{pt3dadd(197484.000000,127128.000000,80050.000000,4.897684)}
{pt3dadd(197376.000000,126936.000000,80050.000000,4.897684)}
{pt3dadd(197280.000000,126768.000000,80075.000000,4.897684)}
{pt3dadd(197208.000000,126588.000000,80150.000000,8.295369)}
{pt3dadd(197112.000000,126432.000000,80075.000000,4.897684)}
{pt3dadd(197004.000000,126204.000000,80125.000000,4.897684)}
{pt3dadd(196932.000000,125976.000000,80175.000000,4.897684)}
{pt3dadd(196896.000000,125736.000000,80200.000000,7.272514)}
{pt3dadd(196860.000000,125472.000000,80275.000000,3.874829)}
{pt3dadd(196824.000000,125232.000000,80400.000000,3.874829)}
{pt3dadd(196728.000000,124980.000000,80400.000000,3.874829)}
{pt3dadd(196668.000000,124752.000000,80450.000000,7.426584)}
{pt3dadd(196632.000000,124488.000000,80450.000000,5.051754)}
{pt3dadd(196644.000000,124212.000000,80375.000000,5.051754)}
{pt3dadd(196608.000000,123960.000000,80475.000000,5.051754)}
{pt3dadd(196512.000000,123756.000000,80400.000000,8.603509)}
{pt3dadd(196512.000000,123528.000000,80350.000000,5.051754)}
{pt3dadd(196476.000000,123276.000000,80375.000000,5.051754)}
{pt3dadd(196332.000000,123036.000000,80375.000000,5.051754)}
{pt3dadd(196188.000000,122772.000000,80425.000000,9.373860)}
{pt3dadd(196212.000000,122532.000000,80600.000000,5.822105)}
{pt3dadd(196032.000000,122256.000000,80525.000000,5.822105)}
{pt3dadd(195996.000000,121956.000000,80700.000000,5.822105)}
{pt3dadd(195924.000000,121728.000000,80700.000000,10.144211)}
{pt3dadd(195828.000000,121368.000000,80750.000000,5.822105)}
{pt3dadd(195756.000000,121128.000000,80775.000000,5.822105)}
{pt3dadd(195684.000000,120960.000000,80825.000000,5.822105)}
{pt3dadd(195588.000000,120792.000000,80825.000000,9.373860)}
{pt3dadd(195564.000000,120588.000000,81000.000000,5.051754)}
{pt3dadd(195468.000000,120348.000000,81000.000000,5.051754)}
{pt3dadd(195396.000000,120096.000000,81000.000000,5.051754)}
{pt3dadd(195288.000000,119868.000000,81050.000000,8.603509)}
{pt3dadd(195084.000000,119676.000000,81150.000000,9.188976)}
{pt3dadd(194844.000000,119424.000000,81325.000000,13.511081)}
{pt3dadd(194628.000000,119172.000000,81300.000000,21.518468)}
{pt3dadd(194556.000000,118920.000000,81400.000000,23.110527)}

{create adhoc79}
{access adhoc79}
{connect adhoc79(1), adhoc78(0)}
{nseg = 1}
{strdef color color = "White"}
{pt3dclear()}
{pt3dadd(194556.000000,118920.000000,81400.000000,23.110527)}
{pt3dadd(194496.000000,118716.000000,81425.000000,14.623100)}
{pt3dadd(194424.000000,118512.000000,81550.000000,13.695965)}
{pt3dadd(194244.000000,118284.000000,81600.000000,12.925614)}
{pt3dadd(194220.000000,118032.000000,81725.000000,14.623100)}
{pt3dadd(194004.000000,117852.000000,81800.000000,19.258772)}

{create adhoc80}
{access adhoc80}
{connect adhoc80(1), adhoc79(0)}
{nseg = 1}
{strdef color color = "White"}
{pt3dclear()}
{pt3dadd(194004.000000,117852.000000,81800.000000,19.258772)}
{pt3dadd(194124.000000,117624.000000,81825.000000,12.269250)}
{pt3dadd(193992.000000,117420.000000,81875.000000,7.961550)}
{pt3dadd(193956.000000,117240.000000,81950.000000,7.319591)}
{pt3dadd(193932.000000,117048.000000,81950.000000,4.409795)}
{pt3dadd(193692.000000,116772.000000,82000.000000,4.409795)}
{pt3dadd(193416.000000,116496.000000,81975.000000,4.409795)}
{pt3dadd(193344.000000,116220.000000,81975.000000,7.319591)}
{pt3dadd(193272.000000,115980.000000,81925.000000,4.409795)}
{pt3dadd(193176.000000,115752.000000,81875.000000,4.409795)}
{pt3dadd(193008.000000,115512.000000,81875.000000,4.409795)}
{pt3dadd(192936.000000,115248.000000,81875.000000,7.961550)}
{pt3dadd(192900.000000,114996.000000,81800.000000,5.051754)}
{pt3dadd(192768.000000,114756.000000,81850.000000,5.051754)}
{pt3dadd(192660.000000,114504.000000,81775.000000,5.051754)}
{pt3dadd(192516.000000,114132.000000,81650.000000,8.603509)}
{pt3dadd(192564.000000,113880.000000,81700.000000,5.051754)}
{pt3dadd(192528.000000,113616.000000,81725.000000,7.961550)}
{pt3dadd(192420.000000,113436.000000,81650.000000,10.871345)}
{pt3dadd(192420.000000,113268.000000,81650.000000,11.199318)}
{pt3dadd(192312.000000,113172.000000,81600.000000,16.048977)}

{create adhoc81}
{access adhoc81}
{connect adhoc81(1), adhoc80(0)}
{nseg = 1}
{strdef color color = "White"}
{pt3dclear()}
{pt3dadd(192312.000000,113172.000000,81600.000000,16.048977)}
{pt3dadd(192396.000000,112980.000000,81550.000000,10.307708)}
{pt3dadd(192456.000000,112788.000000,81575.000000,6.784625)}
{pt3dadd(192468.000000,112620.000000,81575.000000,5.803854)}
{pt3dadd(192444.000000,112392.000000,81575.000000,3.429025)}
{pt3dadd(192312.000000,112128.000000,81450.000000,3.429025)}
{pt3dadd(192288.000000,111840.000000,81450.000000,3.429025)}
{pt3dadd(192252.000000,111624.000000,81450.000000,5.358049)}
{pt3dadd(192192.000000,111384.000000,81425.000000,3.429025)}
{pt3dadd(192120.000000,111180.000000,81325.000000,3.429025)}
{pt3dadd(191952.000000,110964.000000,81250.000000,3.429025)}
{pt3dadd(191712.000000,110712.000000,81150.000000,6.338820)}
{pt3dadd(191580.000000,110472.000000,81075.000000,4.409795)}
{pt3dadd(191592.000000,110256.000000,81125.000000,4.409795)}
{pt3dadd(191604.000000,110016.000000,81050.000000,4.409795)}
{pt3dadd(191496.000000,109824.000000,80900.000000,7.319591)}
{pt3dadd(191652.000000,109632.000000,80825.000000,4.409795)}
{pt3dadd(191580.000000,109404.000000,80675.000000,4.409795)}
{pt3dadd(191544.000000,109236.000000,80600.000000,4.409795)}
{pt3dadd(191520.000000,109008.000000,80425.000000,7.319591)}
{pt3dadd(191424.000000,108780.000000,80300.000000,4.409795)}
{pt3dadd(191388.000000,108600.000000,80150.000000,4.409795)}
{pt3dadd(191448.000000,108348.000000,80050.000000,4.409795)}
{pt3dadd(191160.000000,108072.000000,79900.000000,7.961550)}
{pt3dadd(190908.000000,107844.000000,79675.000000,8.603509)}
{pt3dadd(190656.000000,107556.000000,79600.000000,12.155263)}
{pt3dadd(190512.000000,107328.000000,79600.000000,19.258772)}
{pt3dadd(190104.000000,107052.000000,79425.000000,19.258772)}

{create adhoc82}
{access adhoc82}
{connect adhoc82(1), adhoc81(0)}
{nseg = 1}
{strdef color color = "White"}
{pt3dclear()}
{pt3dadd(190104.000000,107052.000000,79425.000000,19.258772)}
{pt3dadd(190068.000000,106740.000000,79400.000000,13.339181)}
{pt3dadd(189900.000000,106476.000000,79300.000000,8.603509)}
{pt3dadd(189804.000000,106236.000000,79175.000000,7.961550)}
{pt3dadd(189528.000000,105972.000000,78950.000000,4.409795)}
{pt3dadd(189060.000000,105684.000000,78750.000000,4.409795)}
{pt3dadd(188664.000000,105456.000000,78475.000000,4.409795)}
{pt3dadd(188412.000000,105312.000000,78475.000000,5.967316)}
{pt3dadd(188232.000000,105216.000000,78350.000000,3.057520)}
{pt3dadd(187932.000000,105180.000000,78250.000000,3.057520)}
{pt3dadd(187692.000000,105264.000000,78325.000000,3.057520)}
{pt3dadd(187464.000000,105060.000000,78175.000000,4.986545)}
{pt3dadd(187236.000000,104916.000000,78000.000000,3.429025)}
{pt3dadd(187044.000000,104736.000000,77850.000000,3.429025)}
{pt3dadd(186816.000000,104748.000000,77900.000000,3.429025)}
{pt3dadd(186636.000000,104616.000000,77750.000000,5.358049)}
{pt3dadd(186420.000000,104304.000000,77750.000000,3.429025)}
{pt3dadd(186216.000000,103980.000000,77725.000000,3.429025)}
{pt3dadd(186240.000000,103800.000000,77625.000000,3.429025)}
{pt3dadd(185760.000000,103524.000000,77625.000000,6.210428)}
{pt3dadd(185616.000000,103344.000000,77575.000000,4.281404)}
{pt3dadd(185376.000000,103080.000000,77500.000000,4.281404)}
{pt3dadd(185376.000000,102912.000000,77450.000000,4.281404)}
{pt3dadd(185376.000000,102732.000000,77500.000000,6.210428)}
{pt3dadd(185172.000000,102468.000000,77500.000000,3.429025)}
{pt3dadd(185100.000000,102276.000000,77550.000000,3.429025)}
{pt3dadd(185040.000000,102108.000000,77575.000000,3.429025)}
{pt3dadd(184944.000000,101832.000000,77700.000000,4.986545)}
{pt3dadd(184800.000000,101580.000000,77825.000000,4.305454)}
{pt3dadd(184488.000000,101340.000000,77850.000000,5.295399)}
{pt3dadd(184356.000000,101208.000000,77925.000000,7.825665)}
{pt3dadd(184320.000000,101004.000000,78100.000000,6.449724)}

{create adhoc83}
{access adhoc83}
{connect adhoc83(1), adhoc81(0)}
{nseg = 1}
{strdef color color = "White"}
{pt3dclear()}
{pt3dadd(190104.000000,107052.000000,79425.000000,19.258772)}
{pt3dadd(189288.000000,107004.000000,80050.000000,8.711181)}
{pt3dadd(189156.000000,106860.000000,80350.000000,5.826708)}
{pt3dadd(188964.000000,106656.000000,80550.000000,3.522888)}
{pt3dadd(188772.000000,106488.000000,81100.000000,3.343729)}
{pt3dadd(188700.000000,107136.000000,82275.000000,4.572881)}
{pt3dadd(188904.000000,107436.000000,82325.000000,4.478975)}

{create adhoc84}
{access adhoc84}
{connect adhoc84(1), adhoc80(0)}
{nseg = 1}
{strdef color color = "White"}
{pt3dclear()}
{pt3dadd(192312.000000,113172.000000,81600.000000,16.048977)}
{pt3dadd(191472.000000,113172.000000,81875.000000,7.999567)}
{pt3dadd(191268.000000,113184.000000,81925.000000,7.637619)}
{pt3dadd(191100.000000,113424.000000,81975.000000,5.229798)}
{pt3dadd(191004.000000,113364.000000,81975.000000,7.739669)}

{create adhoc85}
{access adhoc85}
{connect adhoc85(1), adhoc79(0)}
{nseg = 1}
{strdef color color = "White"}
{pt3dclear()}
{pt3dadd(194004.000000,117852.000000,81800.000000,19.258772)}
{pt3dadd(193836.000000,117984.000000,82450.000000,9.499480)}
{pt3dadd(194028.000000,118164.000000,82600.000000,8.143417)}
{pt3dadd(194088.000000,118356.000000,82900.000000,4.572881)}
{pt3dadd(194280.000000,118548.000000,83100.000000,4.478975)}

{create adhoc86}
{access adhoc86}
{connect adhoc86(1), adhoc78(0)}
{nseg = 1}
{strdef color color = "White"}
{pt3dclear()}
{pt3dadd(194556.000000,118920.000000,81400.000000,23.110527)}
{pt3dadd(193932.000000,118944.000000,80850.000000,11.299376)}
{pt3dadd(193836.000000,118740.000000,80650.000000,7.379626)}
{pt3dadd(193668.000000,118428.000000,80425.000000,4.047465)}
{pt3dadd(193632.000000,118356.000000,80200.000000,3.737879)}
{pt3dadd(193632.000000,118356.000000,80025.000000,5.229798)}
{pt3dadd(193608.000000,118380.000000,79775.000000,7.739669)}

{create adhoc87}
{access adhoc87}
{connect adhoc87(1), adhoc63(0)}
{nseg = 1}
{strdef color color = "White"}
{pt3dclear()}
{pt3dadd(197532.000000,133608.000000,76500.000000,39.934990)}
{pt3dadd(197772.000000,133596.000000,78200.000000,19.161322)}
{pt3dadd(197700.000000,133812.000000,78875.000000,12.096793)}
{pt3dadd(197412.000000,133896.000000,79125.000000,6.338820)}
{pt3dadd(197388.000000,134100.000000,79100.000000,3.429025)}
{pt3dadd(197328.000000,134280.000000,79300.000000,3.429025)}
{pt3dadd(197376.000000,134460.000000,79450.000000,3.429025)}
{pt3dadd(197244.000000,134652.000000,79500.000000,4.676958)}
{pt3dadd(197208.000000,134820.000000,79550.000000,2.747934)}
{pt3dadd(197208.000000,135012.000000,79600.000000,2.747934)}
{pt3dadd(197220.000000,135180.000000,79650.000000,2.747934)}
{pt3dadd(197184.000000,135372.000000,79650.000000,3.995868)}
{pt3dadd(197016.000000,135588.000000,79650.000000,2.747934)}
{pt3dadd(196980.000000,135732.000000,79725.000000,2.747934)}
{pt3dadd(196944.000000,135972.000000,79675.000000,2.747934)}
{pt3dadd(196848.000000,136164.000000,79725.000000,5.122763)}
{pt3dadd(196824.000000,136416.000000,79725.000000,3.874829)}
{pt3dadd(196692.000000,136632.000000,79850.000000,3.874829)}
{pt3dadd(196656.000000,136848.000000,79900.000000,3.874829)}
{pt3dadd(196656.000000,137040.000000,80075.000000,5.803854)}
{pt3dadd(196656.000000,137292.000000,80250.000000,3.429025)}
{pt3dadd(196740.000000,137556.000000,80400.000000,3.429025)}
{pt3dadd(196836.000000,137784.000000,80600.000000,4.676958)}
{pt3dadd(197004.000000,138048.000000,80800.000000,5.272753)}
{pt3dadd(197064.000000,138300.000000,80975.000000,4.572881)}
{pt3dadd(197160.000000,138504.000000,81075.000000,4.478975)}

{create adhoc88}
{access adhoc88}
{connect adhoc88(1), adhoc62(0)}
{nseg = 1}
{strdef color color = "White"}
{pt3dclear()}
{pt3dadd(197412.000000,136764.000000,75425.000000,38.337590)}
{pt3dadd(196080.000000,136608.000000,75450.000000,16.994238)}
{pt3dadd(195768.000000,136608.000000,75500.000000,14.161317)}
{pt3dadd(194940.000000,136248.000000,75500.000000,7.107957)}
{pt3dadd(194760.000000,136176.000000,75325.000000,13.374147)}

{create adhoc89}
{access adhoc89}
{connect adhoc89(1), adhoc61(0)}
{nseg = 1}
{strdef color color = "White"}
{pt3dclear()}
{pt3dadd(197424.000000,140652.000000,74175.000000,47.921990)}
{pt3dadd(197028.000000,140736.000000,72200.000000,22.893587)}
{pt3dadd(196968.000000,140520.000000,71925.000000,14.336152)}
{pt3dadd(196824.000000,140352.000000,71900.000000,8.603509)}
{pt3dadd(196824.000000,140172.000000,71875.000000,5.051754)}
{pt3dadd(196788.000000,139920.000000,71500.000000,5.051754)}
{pt3dadd(196680.000000,139644.000000,71525.000000,5.051754)}
{pt3dadd(196572.000000,139416.000000,71150.000000,9.373860)}
{pt3dadd(196500.000000,139128.000000,71050.000000,5.822105)}
{pt3dadd(196560.000000,138924.000000,71250.000000,10.144211)}
{pt3dadd(196380.000000,138636.000000,71000.000000,14.466316)}
{pt3dadd(196248.000000,138228.000000,70675.000000,15.907018)}
{pt3dadd(196212.000000,138036.000000,70700.000000,23.110527)}

{create adhoc90}
{access adhoc90}
{connect adhoc90(1), adhoc89(0)}
{nseg = 1}
{strdef color color = "White"}
{pt3dclear()}
{pt3dadd(196212.000000,138036.000000,70700.000000,23.110527)}
{pt3dadd(195888.000000,137772.000000,70375.000000,15.907018)}
{pt3dadd(195744.000000,137472.000000,70025.000000,10.144211)}
{pt3dadd(195672.000000,137208.000000,69950.000000,10.144211)}
{pt3dadd(195504.000000,136920.000000,69675.000000,5.822105)}
{pt3dadd(195372.000000,136668.000000,69450.000000,5.822105)}
{pt3dadd(195204.000000,136416.000000,69175.000000,5.822105)}
{pt3dadd(195000.000000,136164.000000,68800.000000,9.373860)}
{pt3dadd(194748.000000,135936.000000,68500.000000,5.051754)}
{pt3dadd(194280.000000,135696.000000,67975.000000,5.051754)}
{pt3dadd(193596.000000,135384.000000,67600.000000,5.051754)}
{pt3dadd(193452.000000,135396.000000,67300.000000,8.603509)}
{pt3dadd(193320.000000,135300.000000,67250.000000,5.051754)}
{pt3dadd(193092.000000,135096.000000,67325.000000,5.051754)}
{pt3dadd(192888.000000,134964.000000,67300.000000,5.051754)}
{pt3dadd(192744.000000,134760.000000,67250.000000,7.426584)}
{pt3dadd(192504.000000,134616.000000,67250.000000,3.874829)}
{pt3dadd(192252.000000,134448.000000,67275.000000,3.874829)}
{pt3dadd(192120.000000,134412.000000,67200.000000,3.874829)}
{pt3dadd(191892.000000,134280.000000,67250.000000,6.249659)}
{pt3dadd(191676.000000,134208.000000,67200.000000,3.874829)}
{pt3dadd(191448.000000,134040.000000,67125.000000,3.874829)}
{pt3dadd(191160.000000,133788.000000,67125.000000,3.874829)}
{pt3dadd(190932.000000,133572.000000,67100.000000,6.784625)}
{pt3dadd(190668.000000,133392.000000,67150.000000,7.961550)}
{pt3dadd(190476.000000,133260.000000,67150.000000,9.890574)}
{pt3dadd(190248.000000,133020.000000,67200.000000,15.484291)}
{pt3dadd(190008.000000,132996.000000,67225.000000,11.145123)}

{create adhoc91}
{access adhoc91}
{connect adhoc91(1), adhoc90(0)}
{nseg = 1}
{strdef color color = "White"}
{pt3dclear()}
{pt3dadd(190008.000000,132996.000000,67225.000000,11.145123)}
{pt3dadd(189756.000000,132600.000000,67050.000000,8.673090)}
{pt3dadd(189600.000000,132276.000000,66975.000000,5.803854)}
{pt3dadd(189432.000000,132024.000000,67050.000000,5.803854)}
{pt3dadd(189228.000000,131664.000000,67100.000000,3.429025)}
{pt3dadd(189156.000000,131160.000000,66875.000000,3.429025)}
{pt3dadd(188916.000000,130896.000000,66900.000000,3.429025)}
{pt3dadd(188964.000000,130680.000000,66800.000000,5.803854)}
{pt3dadd(189012.000000,130560.000000,66700.000000,3.874829)}
{pt3dadd(189060.000000,130404.000000,66700.000000,3.874829)}
{pt3dadd(189180.000000,130140.000000,66650.000000,3.874829)}
{pt3dadd(189228.000000,129888.000000,66475.000000,5.122763)}
{pt3dadd(189384.000000,129516.000000,66375.000000,2.747934)}
{pt3dadd(189000.000000,128196.000000,66375.000000,2.747934)}
{pt3dadd(188904.000000,127932.000000,66350.000000,2.747934)}
{pt3dadd(188880.000000,127752.000000,66275.000000,3.995868)}
{pt3dadd(188820.000000,127572.000000,66200.000000,3.995868)}
{pt3dadd(188712.000000,127356.000000,66150.000000,5.181884)}
{pt3dadd(188688.000000,127128.000000,66075.000000,7.636473)}
{pt3dadd(188700.000000,127008.000000,66100.000000,7.430082)}

{create adhoc92}
{access adhoc92}
{connect adhoc92(1), adhoc90(0)}
{nseg = 1}
{strdef color color = "White"}
{pt3dclear()}
{pt3dadd(190008.000000,132996.000000,67225.000000,11.145123)}
{pt3dadd(189828.000000,133080.000000,67625.000000,7.930082)}
{pt3dadd(189420.000000,133080.000000,67950.000000,6.915570)}
{pt3dadd(188940.000000,133272.000000,67950.000000,5.976490)}
{pt3dadd(188724.000000,133320.000000,68075.000000,5.745775)}
{pt3dadd(188568.000000,133404.000000,68125.000000,6.449724)}

{create adhoc93}
{access adhoc93}
{connect adhoc93(1), adhoc89(0)}
{nseg = 1}
{strdef color color = "White"}
{pt3dclear()}
{pt3dadd(196212.000000,138036.000000,70700.000000,23.110527)}
{pt3dadd(195036.000000,138120.000000,70500.000000,13.379266)}
{pt3dadd(194772.000000,138012.000000,70425.000000,7.739669)}

{create adhoc94}
{access adhoc94}
{connect adhoc94(1), adhoc60(0)}
{nseg = 1}
{strdef color color = "White"}
{pt3dclear()}
{pt3dadd(197172.000000,142680.000000,73275.000000,39.934990)}
{pt3dadd(195420.000000,142764.000000,72200.000000,16.907531)}
{pt3dadd(195144.000000,142620.000000,72200.000000,10.744518)}
{pt3dadd(194976.000000,142644.000000,72200.000000,4.615041)}
{pt3dadd(194784.000000,142656.000000,72175.000000,3.057520)}
{pt3dadd(194604.000000,142620.000000,72175.000000,4.047465)}
{pt3dadd(194400.000000,142596.000000,72100.000000,5.604986)}
{pt3dadd(194244.000000,142536.000000,72200.000000,5.745775)}
{pt3dadd(193644.000000,142428.000000,72700.000000,9.287602)}

{create adhoc95}
{access adhoc95}
{connect adhoc95(1), adhoc59(0)}
{nseg = 1}
{strdef color color = "White"}
{pt3dclear()}
{pt3dadd(196956.000000,143952.000000,73000.000000,39.934990)}
{pt3dadd(197076.000000,144084.000000,74600.000000,21.515172)}
{pt3dadd(196560.000000,143904.000000,76000.000000,13.509103)}
{pt3dadd(196668.000000,144132.000000,76375.000000,9.219790)}
{pt3dadd(196608.000000,144180.000000,76675.000000,4.897684)}
{pt3dadd(196656.000000,144420.000000,77150.000000,4.897684)}
{pt3dadd(196788.000000,144588.000000,77700.000000,4.897684)}
{pt3dadd(196608.000000,144972.000000,78200.000000,9.219790)}
{pt3dadd(196572.000000,145104.000000,78550.000000,5.822105)}
{pt3dadd(196776.000000,145344.000000,78975.000000,5.822105)}
{pt3dadd(196920.000000,145308.000000,79425.000000,5.822105)}
{pt3dadd(197052.000000,145104.000000,79750.000000,8.731901)}
{pt3dadd(197388.000000,144696.000000,79950.000000,4.409795)}
{pt3dadd(197508.000000,144180.000000,80350.000000,4.409795)}
{pt3dadd(197640.000000,144264.000000,80700.000000,5.657729)}
{pt3dadd(197832.000000,144276.000000,80975.000000,7.215250)}
{pt3dadd(198336.000000,144072.000000,81375.000000,6.175757)}
{pt3dadd(198312.000000,144120.000000,81700.000000,9.287602)}

{create adhoc96}
{access adhoc96}
{connect adhoc96(1), adhoc58(0)}
{nseg = 1}
{strdef color color = "White"}
{pt3dclear()}
{pt3dadd(196932.000000,144348.000000,72975.000000,47.921990)}
{pt3dadd(194904.000000,144312.000000,72550.000000,20.189038)}
{pt3dadd(194052.000000,144276.000000,71775.000000,12.713423)}
{pt3dadd(193848.000000,144240.000000,71450.000000,4.418969)}
{pt3dadd(192456.000000,143868.000000,71050.000000,3.264899)}
{pt3dadd(192084.000000,142980.000000,70650.000000,4.441498)}
{pt3dadd(191952.000000,142764.000000,70625.000000,5.374770)}

{create adhoc97}
{access adhoc97}
{connect adhoc97(1), adhoc57(0)}
{nseg = 1}
{strdef color color = "White"}
{pt3dclear()}
{pt3dadd(196896.000000,152652.000000,72350.000000,47.921990)}
{pt3dadd(195828.000000,152676.000000,70675.000000,22.893587)}
{pt3dadd(195828.000000,152460.000000,70450.000000,14.336152)}
{pt3dadd(195696.000000,152280.000000,70350.000000,9.373860)}
{pt3dadd(195624.000000,152016.000000,70125.000000,5.822105)}
{pt3dadd(195528.000000,151716.000000,69825.000000,5.822105)}
{pt3dadd(195312.000000,151512.000000,69450.000000,5.822105)}
{pt3dadd(195204.000000,151200.000000,68750.000000,15.106503)}
{pt3dadd(195048.000000,150852.000000,68275.000000,18.964059)}
{pt3dadd(195036.000000,150504.000000,67900.000000,30.606765)}
{pt3dadd(194832.000000,150336.000000,67500.000000,42.398304)}

{create adhoc98}
{access adhoc98}
{connect adhoc98(1), adhoc97(0)}
{nseg = 1}
{strdef color color = "White"}
{pt3dclear()}
{pt3dadd(194832.000000,150336.000000,67500.000000,42.398304)}
{pt3dadd(194736.000000,150336.000000,67025.000000,27.411965)}
{pt3dadd(194664.000000,150240.000000,66525.000000,17.047179)}
{pt3dadd(193884.000000,150264.000000,65975.000000,15.223350)}
{pt3dadd(193668.000000,149988.000000,65550.000000,7.855832)}
{pt3dadd(193548.000000,149844.000000,65175.000000,7.855832)}
{pt3dadd(193632.000000,149892.000000,64800.000000,7.855832)}
{pt3dadd(193416.000000,149640.000000,64400.000000,10.230661)}
{pt3dadd(193284.000000,149436.000000,64025.000000,3.874829)}
{pt3dadd(193188.000000,149196.000000,63650.000000,3.874829)}
{pt3dadd(192900.000000,148872.000000,63275.000000,3.874829)}
{pt3dadd(192768.000000,148476.000000,62825.000000,5.803854)}
{pt3dadd(191808.000000,147192.000000,62825.000000,3.429025)}
{pt3dadd(190848.000000,145608.000000,62825.000000,3.429025)}
{pt3dadd(190416.000000,144912.000000,62600.000000,3.429025)}
{pt3dadd(189780.000000,142392.000000,62600.000000,5.358049)}
{pt3dadd(189708.000000,142152.000000,62600.000000,3.429025)}
{pt3dadd(189612.000000,141984.000000,62625.000000,3.429025)}
{pt3dadd(189612.000000,141792.000000,62675.000000,3.429025)}
{pt3dadd(190152.000000,141792.000000,63175.000000,4.418969)}
{pt3dadd(190284.000000,141840.000000,63500.000000,2.489945)}
{pt3dadd(190224.000000,141708.000000,63875.000000,2.489945)}
{pt3dadd(189744.000000,141468.000000,64175.000000,2.489945)}
{pt3dadd(189492.000000,141552.000000,64600.000000,3.737879)}
{pt3dadd(189348.000000,141756.000000,64950.000000,4.676958)}
{pt3dadd(188976.000000,141780.000000,65200.000000,6.794931)}
{pt3dadd(188844.000000,141936.000000,65600.000000,11.145123)}

{create adhoc99}
{access adhoc99}
{connect adhoc99(1), adhoc97(0)}
{nseg = 1}
{strdef color color = "White"}
{pt3dclear()}
{pt3dadd(194832.000000,150336.000000,67500.000000,42.398304)}
{pt3dadd(193980.000000,149232.000000,68050.000000,21.052359)}
{pt3dadd(193524.000000,148956.000000,68450.000000,13.231415)}
{pt3dadd(193308.000000,148884.000000,68775.000000,7.426584)}
{pt3dadd(192840.000000,148080.000000,69200.000000,3.874829)}
{pt3dadd(192600.000000,147768.000000,69400.000000,3.874829)}
{pt3dadd(192348.000000,147456.000000,69825.000000,6.249659)}
{pt3dadd(192144.000000,147204.000000,70000.000000,8.414782)}
{pt3dadd(192012.000000,147180.000000,70125.000000,9.066587)}
{pt3dadd(191880.000000,147084.000000,70100.000000,12.325614)}

{create adhoc100}
{access adhoc100}
{connect adhoc100(1), adhoc56(0)}
{nseg = 1}
{strdef color color = "White"}
{pt3dclear()}
{pt3dadd(197004.000000,153528.000000,72300.000000,47.921990)}
{pt3dadd(197304.000000,153540.000000,76575.000000,24.177506)}
{pt3dadd(197100.000000,153924.000000,77175.000000,15.106503)}
{pt3dadd(196824.000000,154464.000000,77725.000000,9.373860)}
{pt3dadd(196680.000000,154932.000000,78250.000000,5.051754)}
{pt3dadd(196608.000000,155472.000000,78675.000000,5.051754)}
{pt3dadd(196620.000000,155748.000000,79125.000000,5.051754)}
{pt3dadd(196800.000000,156660.000000,79625.000000,8.603509)}
{pt3dadd(196848.000000,156900.000000,79775.000000,5.051754)}
{pt3dadd(196896.000000,157188.000000,79900.000000,5.051754)}
{pt3dadd(196992.000000,157416.000000,80050.000000,5.051754)}
{pt3dadd(197088.000000,157644.000000,80200.000000,10.298281)}
{pt3dadd(197316.000000,157824.000000,80550.000000,6.746526)}
{pt3dadd(197508.000000,158040.000000,80800.000000,6.746526)}
{pt3dadd(197640.000000,158268.000000,81075.000000,6.746526)}
{pt3dadd(198240.000000,158352.000000,82525.000000,9.172755)}
{pt3dadd(198192.000000,158028.000000,82850.000000,3.926229)}
{pt3dadd(198216.000000,158028.000000,83350.000000,3.926229)}
{pt3dadd(198180.000000,157920.000000,83550.000000,3.926229)}
{pt3dadd(198744.000000,157224.000000,82975.000000,6.194065)}
{pt3dadd(198756.000000,156936.000000,82975.000000,3.767836)}
{pt3dadd(198816.000000,156696.000000,82825.000000,3.767836)}
{pt3dadd(198816.000000,156396.000000,82825.000000,3.767836)}
{pt3dadd(198720.000000,156156.000000,82800.000000,5.325357)}
{pt3dadd(198732.000000,155928.000000,82775.000000,3.057520)}
{pt3dadd(198624.000000,155640.000000,82750.000000,3.057520)}
{pt3dadd(198552.000000,155376.000000,82750.000000,3.057520)}
{pt3dadd(198516.000000,155112.000000,82775.000000,5.967316)}
{pt3dadd(198612.000000,154824.000000,82800.000000,4.409795)}
{pt3dadd(198576.000000,154596.000000,82825.000000,4.409795)}
{pt3dadd(198540.000000,154332.000000,82775.000000,4.409795)}
{pt3dadd(198780.000000,154008.000000,82900.000000,5.399740)}
{pt3dadd(198828.000000,153684.000000,82775.000000,3.085740)}
{pt3dadd(198984.000000,153468.000000,82675.000000,3.681535)}
{pt3dadd(199140.000000,153288.000000,82600.000000,5.135891)}
{pt3dadd(199164.000000,153000.000000,82475.000000,4.478975)}

{create adhoc101}
{access adhoc101}
{connect adhoc101(1), adhoc55(0)}
{nseg = 1}
{strdef color color = "White"}
{pt3dclear()}
{pt3dadd(197028.000000,155760.000000,71825.000000,46.005108)}
{pt3dadd(196188.000000,155784.000000,73300.000000,18.930903)}
{pt3dadd(195564.000000,155340.000000,73700.000000,14.877511)}
{pt3dadd(195492.000000,155280.000000,73950.000000,6.364949)}
{pt3dadd(195144.000000,154872.000000,74400.000000,6.449724)}

{create adhoc102}
{access adhoc102}
{connect adhoc102(1), adhoc54(0)}
{nseg = 1}
{strdef color color = "White"}
{pt3dclear()}
{pt3dadd(196860.000000,158868.000000,71575.000000,47.921990)}
{pt3dadd(194868.000000,158748.000000,71450.000000,20.189038)}
{pt3dadd(193200.000000,158496.000000,71475.000000,12.713423)}
{pt3dadd(192252.000000,158724.000000,71475.000000,4.203979)}
{pt3dadd(191640.000000,159180.000000,71475.000000,2.870749)}
{pt3dadd(191472.000000,159192.000000,71100.000000,3.784582)}
{pt3dadd(191364.000000,159156.000000,71100.000000,4.478975)}

{create adhoc103}
{access adhoc103}
{connect adhoc103(1), adhoc53(0)}
{nseg = 1}
{strdef color color = "White"}
{pt3dclear()}
{pt3dadd(196800.000000,161460.000000,70800.000000,69.007660)}
{pt3dadd(195696.000000,161556.000000,69275.000000,44.164906)}

{create adhoc104}
{access adhoc104}
{connect adhoc104(1), adhoc103(0)}
{nseg = 1}
{strdef color color = "White"}
{pt3dclear()}
{pt3dadd(195696.000000,161556.000000,69275.000000,44.164906)}
{pt3dadd(194340.000000,161568.000000,70050.000000,19.881415)}
{pt3dadd(194136.000000,161688.000000,70000.000000,6.951369)}
{pt3dadd(194136.000000,161856.000000,70000.000000,5.374770)}

{create adhoc105}
{access adhoc105}
{connect adhoc105(1), adhoc103(0)}
{nseg = 1}
{strdef color color = "White"}
{pt3dclear()}
{pt3dadd(195696.000000,161556.000000,69275.000000,44.164906)}
{pt3dadd(194736.000000,161388.000000,67425.000000,31.195632)}
{pt3dadd(194460.000000,161088.000000,67025.000000,33.848304)}
{pt3dadd(194616.000000,161652.000000,66600.000000,25.718207)}
{pt3dadd(194244.000000,162372.000000,66100.000000,27.732632)}

{create adhoc106}
{access adhoc106}
{connect adhoc106(1), adhoc105(0)}
{nseg = 1}
{strdef color color = "White"}
{pt3dclear()}
{pt3dadd(194244.000000,162372.000000,66100.000000,27.732632)}
{pt3dadd(194544.000000,160644.000000,66200.000000,16.163801)}
{pt3dadd(194520.000000,160512.000000,64850.000000,10.298281)}
{pt3dadd(194388.000000,160392.000000,64450.000000,6.980779)}
{pt3dadd(194100.000000,160032.000000,64025.000000,3.429025)}
{pt3dadd(193824.000000,159456.000000,63575.000000,3.429025)}
{pt3dadd(193440.000000,158832.000000,63200.000000,3.429025)}
{pt3dadd(193392.000000,158688.000000,63125.000000,6.338820)}
{pt3dadd(193224.000000,158508.000000,63050.000000,4.409795)}
{pt3dadd(193080.000000,158220.000000,62900.000000,4.409795)}
{pt3dadd(192864.000000,157980.000000,62900.000000,4.409795)}
{pt3dadd(192768.000000,157728.000000,62750.000000,7.319591)}
{pt3dadd(192408.000000,157476.000000,62625.000000,4.409795)}
{pt3dadd(191520.000000,156732.000000,62625.000000,4.409795)}
{pt3dadd(191232.000000,156564.000000,62450.000000,4.409795)}
{pt3dadd(190872.000000,156288.000000,62375.000000,6.784625)}
{pt3dadd(190128.000000,156048.000000,61900.000000,3.874829)}
{pt3dadd(189840.000000,155808.000000,61600.000000,3.874829)}
{pt3dadd(189288.000000,155592.000000,61300.000000,3.874829)}
{pt3dadd(188748.000000,155280.000000,60775.000000,5.432350)}
{pt3dadd(188460.000000,154992.000000,60325.000000,3.057520)}
{pt3dadd(188148.000000,154812.000000,60250.000000,3.057520)}
{pt3dadd(187968.000000,154620.000000,59950.000000,3.057520)}
{pt3dadd(188172.000000,154332.000000,59650.000000,5.432350)}
{pt3dadd(188172.000000,154092.000000,59250.000000,3.874829)}
{pt3dadd(188292.000000,153960.000000,59025.000000,3.874829)}
{pt3dadd(188088.000000,153444.000000,58650.000000,3.874829)}
{pt3dadd(187872.000000,153132.000000,58425.000000,4.864774)}
{pt3dadd(187740.000000,152808.000000,58025.000000,3.264899)}
{pt3dadd(187920.000000,152304.000000,57600.000000,4.254844)}
{pt3dadd(187860.000000,151800.000000,57250.000000,6.091406)}
{pt3dadd(187800.000000,151800.000000,57150.000000,6.449724)}

{create adhoc107}
{access adhoc107}
{connect adhoc107(1), adhoc105(0)}
{nseg = 1}
{strdef color color = "White"}
{pt3dclear()}
{pt3dadd(194244.000000,162372.000000,66100.000000,27.732632)}
{pt3dadd(194028.000000,162876.000000,65575.000000,20.837264)}
{pt3dadd(193704.000000,163260.000000,65225.000000,18.348885)}
{pt3dadd(193560.000000,163824.000000,64700.000000,16.654113)}
{pt3dadd(192984.000000,164256.000000,64175.000000,16.163801)}
{pt3dadd(192108.000000,165120.000000,63475.000000,19.258772)}

{create adhoc108}
{access adhoc108}
{connect adhoc108(1), adhoc107(0)}
{nseg = 1}
{strdef color color = "White"}
{pt3dclear()}
{pt3dadd(192108.000000,165120.000000,63475.000000,19.258772)}
{pt3dadd(193488.000000,163836.000000,63200.000000,18.012644)}
{pt3dadd(193428.000000,163716.000000,62825.000000,11.407586)}
{pt3dadd(193620.000000,163620.000000,62275.000000,10.637236)}
{pt3dadd(193524.000000,163548.000000,61850.000000,4.281404)}
{pt3dadd(193428.000000,163548.000000,61425.000000,4.281404)}
{pt3dadd(193152.000000,163548.000000,61075.000000,4.281404)}
{pt3dadd(192840.000000,163488.000000,60650.000000,7.833159)}
{pt3dadd(192492.000000,163356.000000,60300.000000,5.051754)}
{pt3dadd(192096.000000,163116.000000,59900.000000,5.051754)}
{pt3dadd(191700.000000,162924.000000,59475.000000,5.051754)}
{pt3dadd(191124.000000,162768.000000,59100.000000,8.603509)}
{pt3dadd(190848.000000,162636.000000,58775.000000,6.980779)}
{pt3dadd(190572.000000,162540.000000,58625.000000,10.634632)}
{pt3dadd(190320.000000,162444.000000,58400.000000,11.145123)}

{create adhoc109}
{access adhoc109}
{connect adhoc109(1), adhoc108(0)}
{nseg = 1}
{strdef color color = "White"}
{pt3dclear()}
{pt3dadd(190320.000000,162444.000000,58400.000000,11.145123)}
{pt3dadd(190368.000000,162792.000000,57925.000000,7.930082)}
{pt3dadd(189912.000000,162852.000000,57600.000000,5.358049)}
{pt3dadd(189516.000000,162960.000000,57375.000000,6.980779)}
{pt3dadd(188928.000000,162972.000000,57100.000000,5.051754)}
{pt3dadd(188496.000000,162960.000000,56725.000000,5.051754)}
{pt3dadd(187104.000000,163308.000000,56650.000000,5.051754)}
{pt3dadd(187272.000000,163404.000000,56050.000000,7.319591)}
{pt3dadd(186828.000000,163404.000000,55625.000000,3.767836)}
{pt3dadd(186312.000000,163428.000000,55150.000000,4.542790)}
{pt3dadd(185916.000000,163452.000000,55050.000000,5.790724)}
{pt3dadd(185820.000000,163620.000000,54850.000000,4.871480)}
{pt3dadd(185880.000000,163704.000000,54500.000000,7.739669)}

{create adhoc110}
{access adhoc110}
{connect adhoc110(1), adhoc108(0)}
{nseg = 1}
{strdef color color = "White"}
{pt3dclear()}
{pt3dadd(190320.000000,162444.000000,58400.000000,11.145123)}
{pt3dadd(190080.000000,161928.000000,58350.000000,7.781480)}
{pt3dadd(189876.000000,161712.000000,58050.000000,5.268888)}
{pt3dadd(189672.000000,161424.000000,58025.000000,4.587797)}
{pt3dadd(189648.000000,161208.000000,57950.000000,2.747934)}
{pt3dadd(189588.000000,161028.000000,57825.000000,2.747934)}
{pt3dadd(189528.000000,160788.000000,57800.000000,2.747934)}
{pt3dadd(189420.000000,160596.000000,57725.000000,4.305454)}
{pt3dadd(189468.000000,160320.000000,57725.000000,3.057520)}
{pt3dadd(189372.000000,160104.000000,57725.000000,3.057520)}
{pt3dadd(189336.000000,159876.000000,57850.000000,3.057520)}
{pt3dadd(189240.000000,159636.000000,57750.000000,4.615041)}
{pt3dadd(189168.000000,159408.000000,57475.000000,3.057520)}
{pt3dadd(189024.000000,159168.000000,57375.000000,3.057520)}
{pt3dadd(188820.000000,158964.000000,57375.000000,3.057520)}
{pt3dadd(188532.000000,158700.000000,57225.000000,4.305454)}
{pt3dadd(188184.000000,158460.000000,57075.000000,4.676958)}
{pt3dadd(187860.000000,158364.000000,56900.000000,5.451912)}
{pt3dadd(187416.000000,158160.000000,56950.000000,8.086521)}
{pt3dadd(187284.000000,157932.000000,56725.000000,5.374770)}

{create adhoc111}
{access adhoc111}
{connect adhoc111(1), adhoc107(0)}
{nseg = 1}
{strdef color color = "White"}
{pt3dclear()}
{pt3dadd(192108.000000,165120.000000,63475.000000,19.258772)}
{pt3dadd(191520.000000,166692.000000,63100.000000,18.012644)}
{pt3dadd(190872.000000,167460.000000,62450.000000,11.407586)}
{pt3dadd(190560.000000,167796.000000,61800.000000,12.177937)}
{pt3dadd(189924.000000,168372.000000,61275.000000,5.822105)}
{pt3dadd(189456.000000,169020.000000,60725.000000,5.822105)}
{pt3dadd(189096.000000,169140.000000,60875.000000,5.822105)}
{pt3dadd(188724.000000,169344.000000,60700.000000,9.373860)}
{pt3dadd(188508.000000,169620.000000,60725.000000,5.051754)}
{pt3dadd(188232.000000,169824.000000,60600.000000,5.051754)}
{pt3dadd(187872.000000,170256.000000,60400.000000,5.051754)}
{pt3dadd(187584.000000,170592.000000,60300.000000,9.373860)}
{pt3dadd(186996.000000,171024.000000,60300.000000,5.822105)}
{pt3dadd(186756.000000,171420.000000,59775.000000,5.822105)}
{pt3dadd(186408.000000,171612.000000,59550.000000,5.822105)}
{pt3dadd(186120.000000,171960.000000,59125.000000,11.068632)}
{pt3dadd(185808.000000,172320.000000,58775.000000,6.746526)}
{pt3dadd(185604.000000,172536.000000,58000.000000,14.114045)}
{pt3dadd(185472.000000,172716.000000,57750.000000,18.436150)}
{pt3dadd(185328.000000,172872.000000,57300.000000,20.982707)}
{pt3dadd(185112.000000,173148.000000,56975.000000,23.110527)}

{create adhoc112}
{access adhoc112}
{connect adhoc112(1), adhoc111(0)}
{nseg = 1}
{strdef color color = "White"}
{pt3dclear()}
{pt3dadd(185112.000000,173148.000000,56975.000000,23.110527)}
{pt3dadd(185004.000000,173364.000000,57650.000000,12.661558)}
{pt3dadd(185040.000000,173568.000000,57700.000000,8.196935)}
{pt3dadd(185208.000000,173724.000000,57800.000000,5.803854)}
{pt3dadd(185064.000000,174060.000000,58075.000000,3.429025)}
{pt3dadd(184992.000000,174252.000000,58250.000000,3.429025)}
{pt3dadd(184860.000000,174372.000000,58375.000000,3.429025)}
{pt3dadd(184908.000000,174588.000000,58650.000000,5.358049)}
{pt3dadd(184872.000000,174768.000000,59100.000000,3.429025)}
{pt3dadd(184776.000000,174948.000000,59675.000000,3.429025)}
{pt3dadd(184752.000000,175128.000000,59950.000000,3.429025)}
{pt3dadd(184584.000000,175284.000000,60300.000000,4.986545)}
{pt3dadd(184644.000000,175452.000000,60350.000000,3.057520)}
{pt3dadd(184608.000000,175632.000000,60425.000000,4.047465)}
{pt3dadd(184464.000000,175812.000000,60425.000000,5.037410)}
{pt3dadd(184332.000000,176028.000000,60475.000000,4.799816)}
{pt3dadd(184224.000000,176304.000000,60850.000000,6.449724)}

{create adhoc113}
{access adhoc113}
{connect adhoc113(1), adhoc111(0)}
{nseg = 1}
{strdef color color = "White"}
{pt3dclear()}
{pt3dadd(185112.000000,173148.000000,56975.000000,23.110527)}
{pt3dadd(184944.000000,173304.000000,56400.000000,13.339181)}
{pt3dadd(184932.000000,173520.000000,56100.000000,8.603509)}
{pt3dadd(184644.000000,173748.000000,55925.000000,6.121267)}
{pt3dadd(183996.000000,174000.000000,55600.000000,3.339864)}
{pt3dadd(183756.000000,174096.000000,55375.000000,3.339864)}
{pt3dadd(182952.000000,174060.000000,54925.000000,3.339864)}
{pt3dadd(181812.000000,174780.000000,54450.000000,6.249659)}
{pt3dadd(181608.000000,174972.000000,54150.000000,4.409795)}
{pt3dadd(181428.000000,175248.000000,53775.000000,4.409795)}
{pt3dadd(181020.000000,175524.000000,53300.000000,4.409795)}
{pt3dadd(180960.000000,175776.000000,53325.000000,5.967316)}
{pt3dadd(180708.000000,175980.000000,53250.000000,3.057520)}
{pt3dadd(180396.000000,176196.000000,53225.000000,3.057520)}
{pt3dadd(179820.000000,176448.000000,53150.000000,3.057520)}
{pt3dadd(179232.000000,176832.000000,52875.000000,4.615041)}
{pt3dadd(178380.000000,177432.000000,52625.000000,3.057520)}
{pt3dadd(177792.000000,177888.000000,52400.000000,4.615041)}
{pt3dadd(177624.000000,178080.000000,52275.000000,5.862975)}
{pt3dadd(177420.000000,178812.000000,52100.000000,6.175757)}
{pt3dadd(177456.000000,179484.000000,51725.000000,7.739669)}
