# Supplementary material for: Full reconstruction of large lobula plate tangential cells in Drosophila from a 3D EM dataset
Source: PLoS One. 2018 Nov 28;13(11):e0207828. doi: 10.1371/journal.pone.0207828 (PMC6261601; doi:10.1371/journal.pone.0207828)
Supplement: S1 Dataset — (ZIP) [file pone.0207828.s001.zip › Diameter hoc/VS_VSL_preliminary/VS5_5skels_ck.001_completed.hoc0001.hoc]

/* created with convertKnossosNmlToHoc.m */

{create adhoc1}
{access adhoc1}
{nseg = 1}
{strdef color color = "White"}
{pt3dclear()}
{pt3dadd(191016.000000,200184.000000,108400.000000,1000.000000)}
{pt3dadd(191196.000000,200928.000000,107675.000000,343.077544)}
{pt3dadd(191868.000000,201420.000000,107000.000000,206.346526)}
{pt3dadd(191988.000000,201672.000000,106550.000000,22.908364)}
{pt3dadd(191724.000000,202188.000000,106025.000000,17.661838)}
{pt3dadd(192012.000000,202380.000000,105675.000000,17.661838)}
{pt3dadd(192120.000000,202308.000000,105350.000000,17.661838)}
{pt3dadd(192156.000000,202632.000000,104825.000000,34.023676)}
{pt3dadd(192168.000000,202764.000000,104300.000000,17.761838)}
{pt3dadd(192048.000000,203088.000000,103775.000000,17.761838)}
{pt3dadd(192228.000000,203436.000000,103350.000000,17.761838)}
{pt3dadd(192228.000000,203760.000000,102825.000000,37.336043)}
{pt3dadd(192564.000000,204264.000000,102450.000000,21.074205)}
{pt3dadd(192744.000000,204684.000000,102000.000000,21.074205)}
{pt3dadd(192696.000000,204948.000000,101500.000000,21.074205)}
{pt3dadd(192468.000000,205392.000000,100800.000000,44.623251)}
{pt3dadd(192408.000000,205764.000000,100225.000000,25.049046)}
{pt3dadd(192192.000000,206088.000000,99550.000000,25.049046)}
{pt3dadd(192084.000000,206724.000000,98900.000000,25.049046)}
{pt3dadd(192000.000000,207168.000000,98300.000000,52.223148)}
{pt3dadd(192060.000000,207120.000000,97800.000000,28.674102)}
{pt3dadd(191856.000000,207468.000000,97275.000000,28.674102)}
{pt3dadd(191736.000000,207972.000000,96825.000000,28.674102)}
{pt3dadd(191484.000000,208032.000000,96375.000000,52.223148)}
{pt3dadd(191388.000000,208452.000000,95900.000000,25.049046)}
{pt3dadd(191340.000000,208716.000000,95425.000000,25.049046)}
{pt3dadd(191112.000000,208908.000000,94875.000000,25.049046)}
{pt3dadd(190776.000000,208860.000000,94200.000000,48.598092)}
{pt3dadd(190572.000000,208968.000000,93650.000000,25.049046)}
{pt3dadd(190296.000000,209052.000000,93025.000000,25.049046)}
{pt3dadd(189936.000000,209124.000000,92300.000000,25.049046)}
{pt3dadd(189888.000000,209004.000000,91800.000000,52.223148)}
{pt3dadd(189480.000000,208932.000000,91175.000000,28.674102)}
{pt3dadd(189492.000000,208908.000000,90750.000000,28.674102)}
{pt3dadd(189084.000000,208920.000000,90250.000000,28.674102)}
{pt3dadd(189012.000000,208692.000000,89625.000000,56.992958)}
{pt3dadd(188616.000000,208308.000000,89000.000000,29.818856)}
{pt3dadd(188316.000000,208476.000000,88375.000000,29.818856)}
{pt3dadd(188328.000000,208068.000000,87625.000000,29.818856)}
{pt3dadd(188376.000000,207828.000000,87075.000000,49.393061)}
{pt3dadd(188280.000000,207768.000000,86525.000000,21.074205)}
{pt3dadd(188112.000000,207264.000000,86000.000000,21.074205)}
{pt3dadd(188412.000000,206892.000000,87225.000000,21.074205)}
{pt3dadd(188592.000000,206556.000000,87150.000000,34.575737)}
{pt3dadd(188388.000000,206208.000000,86775.000000,15.001532)}
{pt3dadd(188436.000000,205932.000000,86600.000000,15.001532)}
{pt3dadd(188592.000000,205560.000000,86450.000000,15.001532)}
{pt3dadd(188712.000000,205212.000000,86525.000000,28.503064)}
{pt3dadd(188616.000000,204924.000000,86150.000000,15.001532)}
{pt3dadd(188772.000000,204588.000000,85825.000000,15.001532)}
{pt3dadd(188712.000000,204204.000000,85425.000000,15.001532)}
{pt3dadd(188940.000000,203808.000000,85550.000000,24.285930)}
{pt3dadd(188880.000000,203496.000000,85175.000000,10.784398)}
{pt3dadd(188676.000000,203172.000000,84850.000000,10.784398)}
{pt3dadd(188652.000000,203100.000000,84825.000000,10.784398)}
{pt3dadd(188664.000000,202776.000000,84825.000000,21.525623)}
{pt3dadd(188856.000000,202404.000000,84725.000000,12.241225)}
{pt3dadd(189048.000000,202044.000000,84575.000000,12.241225)}
{pt3dadd(189132.000000,201780.000000,84175.000000,12.241225)}
{pt3dadd(189456.000000,201480.000000,84150.000000,21.525623)}
{pt3dadd(189564.000000,201168.000000,84075.000000,10.784398)}
{pt3dadd(189756.000000,200832.000000,84125.000000,10.784398)}
{pt3dadd(189480.000000,200544.000000,83750.000000,10.784398)}
{pt3dadd(189492.000000,200280.000000,83600.000000,21.985675)}
{pt3dadd(189624.000000,200028.000000,83475.000000,12.701277)}
{pt3dadd(189600.000000,199644.000000,83125.000000,12.701277)}
{pt3dadd(189768.000000,199392.000000,83025.000000,12.701277)}
{pt3dadd(189828.000000,198984.000000,82400.000000,26.202809)}
{pt3dadd(189888.000000,198660.000000,82075.000000,15.001532)}
{pt3dadd(189924.000000,198372.000000,81950.000000,15.001532)}
{pt3dadd(189852.000000,197988.000000,81425.000000,31.263370)}
{pt3dadd(189888.000000,197628.000000,81325.000000,46.862735)}
{pt3dadd(189924.000000,197400.000000,81175.000000,54.602005)}
{pt3dadd(189804.000000,197160.000000,80725.000000,79.496826)}

{create adhoc2}
{access adhoc2}
{connect adhoc2(1), adhoc1(0)}
{nseg = 1}
{strdef color color = "White"}
{pt3dclear()}
{pt3dadd(189804.000000,197160.000000,80725.000000,79.496826)}
{pt3dadd(188592.000000,197160.000000,82650.000000,31.456991)}
{pt3dadd(188400.000000,196968.000000,82950.000000,19.474195)}
{pt3dadd(188652.000000,196728.000000,83575.000000,8.196935)}
{pt3dadd(188712.000000,196524.000000,83725.000000,5.822105)}
{pt3dadd(188820.000000,196356.000000,84050.000000,5.822105)}
{pt3dadd(188988.000000,196176.000000,84125.000000,5.822105)}
{pt3dadd(189300.000000,195984.000000,84375.000000,7.751130)}
{pt3dadd(189480.000000,195720.000000,84350.000000,5.358049)}
{pt3dadd(189588.000000,195564.000000,84375.000000,7.732879)}
{pt3dadd(189792.000000,195408.000000,84875.000000,11.888131)}
{pt3dadd(190008.000000,194700.000000,84825.000000,13.374147)}

{create adhoc3}
{access adhoc3}
{connect adhoc3(1), adhoc1(0)}
{nseg = 1}
{strdef color color = "White"}
{pt3dclear()}
{pt3dadd(189804.000000,197160.000000,80725.000000,79.496826)}
{pt3dadd(189684.000000,196956.000000,80525.000000,49.081392)}
{pt3dadd(189636.000000,196740.000000,80150.000000,30.048835)}
{pt3dadd(189564.000000,196452.000000,80125.000000,25.650747)}
{pt3dadd(189672.000000,195636.000000,79775.000000,12.701277)}
{pt3dadd(189888.000000,195072.000000,79450.000000,12.701277)}
{pt3dadd(190128.000000,194424.000000,79050.000000,12.701277)}
{pt3dadd(189912.000000,194124.000000,78700.000000,23.902554)}
{pt3dadd(190080.000000,193824.000000,78425.000000,12.701277)}
{pt3dadd(190188.000000,193440.000000,78250.000000,12.701277)}
{pt3dadd(190356.000000,193164.000000,78025.000000,12.701277)}
{pt3dadd(190440.000000,192816.000000,77975.000000,23.902554)}
{pt3dadd(190608.000000,192540.000000,77725.000000,12.701277)}
{pt3dadd(190620.000000,192240.000000,77625.000000,12.701277)}
{pt3dadd(190704.000000,191904.000000,77475.000000,23.902554)}
{pt3dadd(190872.000000,191472.000000,77275.000000,35.103832)}
{pt3dadd(190932.000000,191076.000000,77150.000000,38.837591)}
{pt3dadd(191040.000000,190836.000000,77075.000000,57.506386)}

{create adhoc4}
{access adhoc4}
{connect adhoc4(1), adhoc3(0)}
{nseg = 1}
{strdef color color = "White"}
{pt3dclear()}
{pt3dadd(191040.000000,190836.000000,77075.000000,57.506386)}
{pt3dadd(189588.000000,190836.000000,78025.000000,22.764663)}
{pt3dadd(189480.000000,190680.000000,78150.000000,18.727644)}
{pt3dadd(189288.000000,190596.000000,78350.000000,8.948077)}
{pt3dadd(189240.000000,190512.000000,78625.000000,11.145123)}

{create adhoc5}
{access adhoc5}
{connect adhoc5(1), adhoc3(0)}
{nseg = 1}
{strdef color color = "White"}
{pt3dclear()}
{pt3dadd(191040.000000,190836.000000,77075.000000,57.506386)}
{pt3dadd(191148.000000,190512.000000,76950.000000,38.837591)}
{pt3dadd(191256.000000,190092.000000,76575.000000,23.902554)}
{pt3dadd(191448.000000,189792.000000,76625.000000,26.202809)}
{pt3dadd(191640.000000,189432.000000,76425.000000,27.951002)}
{pt3dadd(191856.000000,189084.000000,76375.000000,43.207690)}
{pt3dadd(192096.000000,188736.000000,76125.000000,71.012817)}
{pt3dadd(192288.000000,188604.000000,75875.000000,77.783440)}

{create adhoc6}
{access adhoc6}
{connect adhoc6(1), adhoc5(0)}
{nseg = 1}
{strdef color color = "White"}
{pt3dclear()}
{pt3dadd(192288.000000,188604.000000,75875.000000,77.783440)}
{pt3dadd(191040.000000,188604.000000,77525.000000,31.777472)}
{pt3dadd(190764.000000,187440.000000,78525.000000,19.666483)}
{pt3dadd(190944.000000,187188.000000,78425.000000,5.399740)}
{pt3dadd(191004.000000,187068.000000,78575.000000,2.489945)}
{pt3dadd(191064.000000,186912.000000,78600.000000,2.489945)}
{pt3dadd(191100.000000,186708.000000,78825.000000,4.864774)}
{pt3dadd(191388.000000,186492.000000,79250.000000,5.854719)}
{pt3dadd(191700.000000,186264.000000,79475.000000,7.107957)}
{pt3dadd(191880.000000,186276.000000,79800.000000,6.449724)}

{create adhoc7}
{access adhoc7}
{connect adhoc7(1), adhoc5(0)}
{nseg = 1}
{strdef color color = "White"}
{pt3dclear()}
{pt3dadd(192288.000000,188604.000000,75875.000000,77.783440)}
{pt3dadd(192216.000000,188436.000000,75825.000000,51.866799)}
{pt3dadd(192408.000000,188136.000000,75575.000000,31.720079)}
{pt3dadd(192384.000000,187752.000000,75150.000000,29.964923)}
{pt3dadd(192600.000000,187212.000000,74750.000000,30.906420)}
{pt3dadd(192612.000000,186984.000000,74375.000000,50.510700)}
{pt3dadd(192924.000000,186372.000000,74125.000000,81.024440)}

{create adhoc8}
{access adhoc8}
{connect adhoc8(1), adhoc7(0)}
{nseg = 1}
{strdef color color = "White"}
{pt3dclear()}
{pt3dadd(192924.000000,186372.000000,74125.000000,81.024440)}
{pt3dadd(189888.000000,186204.000000,70900.000000,53.436236)}
{pt3dadd(189768.000000,185988.000000,70325.000000,37.521143)}
{pt3dadd(189552.000000,185844.000000,70250.000000,33.279160)}

{create adhoc9}
{access adhoc9}
{connect adhoc9(1), adhoc8(0)}
{nseg = 1}
{strdef color color = "White"}
{pt3dclear()}
{pt3dadd(189552.000000,185844.000000,70250.000000,33.279160)}
{pt3dadd(189348.000000,186156.000000,70275.000000,22.242384)}
{pt3dadd(189084.000000,186540.000000,69950.000000,13.945430)}
{pt3dadd(188868.000000,186708.000000,69600.000000,12.836125)}
{pt3dadd(188592.000000,186780.000000,69425.000000,6.746526)}
{pt3dadd(188400.000000,186780.000000,69375.000000,6.746526)}
{pt3dadd(188184.000000,186960.000000,69050.000000,6.746526)}
{pt3dadd(187968.000000,186876.000000,68900.000000,11.068632)}
{pt3dadd(187704.000000,187020.000000,68850.000000,5.822105)}
{pt3dadd(187476.000000,187116.000000,68675.000000,5.822105)}
{pt3dadd(187248.000000,187188.000000,68700.000000,5.822105)}
{pt3dadd(187068.000000,187260.000000,68575.000000,11.068632)}
{pt3dadd(186864.000000,187428.000000,68350.000000,6.746526)}
{pt3dadd(186660.000000,187536.000000,67875.000000,6.746526)}
{pt3dadd(186432.000000,187716.000000,67775.000000,6.746526)}
{pt3dadd(186252.000000,187848.000000,67675.000000,11.993053)}
{pt3dadd(186048.000000,187992.000000,67425.000000,6.746526)}
{pt3dadd(185856.000000,188064.000000,67375.000000,6.746526)}
{pt3dadd(185652.000000,188268.000000,67100.000000,6.746526)}
{pt3dadd(185436.000000,188484.000000,66900.000000,11.068632)}
{pt3dadd(185268.000000,188592.000000,66700.000000,5.822105)}
{pt3dadd(185076.000000,188580.000000,66600.000000,5.822105)}
{pt3dadd(184812.000000,188676.000000,66600.000000,5.822105)}
{pt3dadd(184572.000000,188676.000000,66475.000000,8.731901)}
{pt3dadd(184632.000000,189096.000000,66000.000000,4.409795)}
{pt3dadd(184296.000000,189192.000000,65625.000000,4.409795)}
{pt3dadd(184044.000000,189252.000000,65275.000000,4.409795)}
{pt3dadd(183624.000000,189348.000000,64925.000000,7.961550)}
{pt3dadd(183408.000000,189348.000000,64600.000000,6.609275)}
{pt3dadd(183156.000000,189492.000000,64225.000000,10.015458)}
{pt3dadd(182628.000000,189672.000000,63825.000000,9.287602)}

{create adhoc10}
{access adhoc10}
{connect adhoc10(1), adhoc9(0)}
{nseg = 1}
{strdef color color = "White"}
{pt3dclear()}
{pt3dadd(182628.000000,189672.000000,63825.000000,9.287602)}
{pt3dadd(181380.000000,190188.000000,63700.000000,11.354623)}
{pt3dadd(180960.000000,190716.000000,63400.000000,10.838645)}
{pt3dadd(180396.000000,190776.000000,63100.000000,7.739669)}

{create adhoc11}
{access adhoc11}
{connect adhoc11(1), adhoc9(0)}
{nseg = 1}
{strdef color color = "White"}
{pt3dclear()}
{pt3dadd(182628.000000,189672.000000,63825.000000,9.287602)}
{pt3dadd(183072.000000,189336.000000,63700.000000,6.691735)}
{pt3dadd(183216.000000,189108.000000,63450.000000,4.615041)}
{pt3dadd(183168.000000,188952.000000,63175.000000,4.305454)}
{pt3dadd(183096.000000,188736.000000,62950.000000,2.747934)}
{pt3dadd(183096.000000,188580.000000,62600.000000,2.747934)}
{pt3dadd(183096.000000,188352.000000,62375.000000,2.747934)}
{pt3dadd(183084.000000,188124.000000,62100.000000,4.305454)}
{pt3dadd(183060.000000,187908.000000,61775.000000,3.057520)}
{pt3dadd(183060.000000,187788.000000,61525.000000,3.057520)}
{pt3dadd(183096.000000,187704.000000,61300.000000,3.057520)}
{pt3dadd(182976.000000,187704.000000,61025.000000,4.615041)}
{pt3dadd(182760.000000,187560.000000,60850.000000,3.057520)}
{pt3dadd(182304.000000,187380.000000,60500.000000,3.057520)}
{pt3dadd(181740.000000,187056.000000,60200.000000,3.057520)}
{pt3dadd(180732.000000,187308.000000,59925.000000,5.432350)}
{pt3dadd(180516.000000,187320.000000,59975.000000,3.874829)}
{pt3dadd(180348.000000,187464.000000,59925.000000,3.874829)}
{pt3dadd(180156.000000,187524.000000,59900.000000,3.874829)}
{pt3dadd(179952.000000,187764.000000,59750.000000,5.001405)}
{pt3dadd(179820.000000,187992.000000,59775.000000,2.626576)}
{pt3dadd(179604.000000,188148.000000,59750.000000,2.626576)}
{pt3dadd(179412.000000,188328.000000,59700.000000,3.616521)}
{pt3dadd(179196.000000,188388.000000,59725.000000,4.212316)}
{pt3dadd(178992.000000,188424.000000,59675.000000,4.142900)}
{pt3dadd(178764.000000,188460.000000,59600.000000,4.478975)}

{create adhoc12}
{access adhoc12}
{connect adhoc12(1), adhoc8(0)}
{nseg = 1}
{strdef color color = "White"}
{pt3dclear()}
{pt3dadd(189552.000000,185844.000000,70250.000000,33.279160)}
{pt3dadd(189504.000000,184104.000000,68850.000000,16.942712)}
{pt3dadd(189360.000000,183540.000000,68575.000000,16.585218)}
{pt3dadd(189252.000000,182892.000000,67925.000000,11.199318)}
{pt3dadd(189084.000000,182568.000000,67500.000000,16.048977)}

{create adhoc13}
{access adhoc13}
{connect adhoc13(1), adhoc12(0)}
{nseg = 1}
{strdef color color = "White"}
{pt3dclear()}
{pt3dadd(189084.000000,182568.000000,67500.000000,16.048977)}
{pt3dadd(188964.000000,182064.000000,66950.000000,13.553168)}
{pt3dadd(188712.000000,182028.000000,66800.000000,12.045077)}
{pt3dadd(188868.000000,181908.000000,66425.000000,7.021961)}
{pt3dadd(188964.000000,181704.000000,66100.000000,6.191736)}

{create adhoc14}
{access adhoc14}
{connect adhoc14(1), adhoc12(0)}
{nseg = 1}
{strdef color color = "White"}
{pt3dclear()}
{pt3dadd(189084.000000,182568.000000,67500.000000,16.048977)}
{pt3dadd(188964.000000,183060.000000,68025.000000,9.564700)}
{pt3dadd(188844.000000,183156.000000,68125.000000,8.361708)}
{pt3dadd(188676.000000,183120.000000,68275.000000,4.871480)}
{pt3dadd(188424.000000,182820.000000,68375.000000,5.374770)}

{create adhoc15}
{access adhoc15}
{connect adhoc15(1), adhoc7(0)}
{nseg = 1}
{strdef color color = "White"}
{pt3dclear()}
{pt3dadd(192924.000000,186372.000000,74125.000000,81.024440)}
{pt3dadd(192648.000000,186204.000000,73575.000000,55.111210)}
{pt3dadd(192732.000000,185916.000000,73300.000000,33.666726)}
{pt3dadd(193044.000000,185616.000000,73050.000000,31.263370)}
{pt3dadd(193128.000000,185340.000000,72875.000000,15.001532)}
{pt3dadd(193188.000000,185076.000000,72850.000000,15.001532)}
{pt3dadd(193512.000000,184728.000000,72825.000000,15.001532)}
{pt3dadd(193800.000000,184380.000000,72750.000000,28.503064)}
{pt3dadd(193908.000000,184008.000000,72700.000000,15.001532)}
{pt3dadd(193968.000000,183744.000000,72750.000000,15.001532)}
{pt3dadd(194004.000000,183444.000000,72700.000000,15.001532)}
{pt3dadd(193956.000000,183168.000000,72775.000000,26.202809)}
{pt3dadd(193776.000000,182880.000000,72900.000000,12.701277)}
{pt3dadd(193596.000000,182556.000000,72925.000000,12.701277)}
{pt3dadd(193632.000000,182316.000000,72925.000000,12.701277)}
{pt3dadd(193764.000000,182088.000000,72975.000000,21.985675)}
{pt3dadd(193692.000000,181692.000000,73000.000000,10.784398)}
{pt3dadd(193512.000000,181404.000000,72900.000000,21.525625)}
{pt3dadd(193368.000000,181032.000000,72925.000000,32.726902)}
{pt3dadd(193272.000000,180648.000000,73125.000000,38.070840)}
{pt3dadd(193332.000000,180348.000000,73075.000000,57.506386)}

{create adhoc16}
{access adhoc16}
{connect adhoc16(1), adhoc15(0)}
{nseg = 1}
{strdef color color = "White"}
{pt3dclear()}
{pt3dadd(193332.000000,180348.000000,73075.000000,57.506386)}
{pt3dadd(190812.000000,180288.000000,73150.000000,23.383836)}
{pt3dadd(189996.000000,180648.000000,73525.000000,14.630302)}
{pt3dadd(189624.000000,181104.000000,73850.000000,6.338820)}
{pt3dadd(189624.000000,181392.000000,74175.000000,4.409795)}
{pt3dadd(189372.000000,181944.000000,74425.000000,4.409795)}
{pt3dadd(189432.000000,182460.000000,74725.000000,6.784625)}
{pt3dadd(189468.000000,182244.000000,75075.000000,9.694420)}
{pt3dadd(189624.000000,182388.000000,74875.000000,10.307708)}
{pt3dadd(189816.000000,182448.000000,74850.000000,16.048977)}

{create adhoc17}
{access adhoc17}
{connect adhoc17(1), adhoc15(0)}
{nseg = 1}
{strdef color color = "White"}
{pt3dclear()}
{pt3dadd(193332.000000,180348.000000,73075.000000,57.506386)}
{pt3dadd(193284.000000,179988.000000,72950.000000,38.837591)}
{pt3dadd(193548.000000,179700.000000,73175.000000,23.902554)}
{pt3dadd(193524.000000,179376.000000,73175.000000,23.902554)}
{pt3dadd(193656.000000,179076.000000,73300.000000,12.701277)}
{pt3dadd(193788.000000,178788.000000,73425.000000,12.701277)}
{pt3dadd(193692.000000,178584.000000,73600.000000,12.701277)}
{pt3dadd(193668.000000,178212.000000,73525.000000,21.985675)}
{pt3dadd(193800.000000,177864.000000,73625.000000,10.784398)}
{pt3dadd(193932.000000,177600.000000,73750.000000,10.784398)}
{pt3dadd(194064.000000,177252.000000,73700.000000,10.784398)}
{pt3dadd(194232.000000,176880.000000,73925.000000,21.525624)}
{pt3dadd(194316.000000,176544.000000,73875.000000,12.241226)}
{pt3dadd(194508.000000,176244.000000,73975.000000,12.241226)}
{pt3dadd(194724.000000,175968.000000,74175.000000,12.241226)}
{pt3dadd(194760.000000,175740.000000,74175.000000,21.525624)}
{pt3dadd(194772.000000,175488.000000,74075.000000,10.784398)}
{pt3dadd(194808.000000,175272.000000,74025.000000,10.784398)}
{pt3dadd(194820.000000,174984.000000,74075.000000,10.784398)}
{pt3dadd(195036.000000,174720.000000,74275.000000,23.733872)}
{pt3dadd(195096.000000,174384.000000,74400.000000,23.733872)}
{pt3dadd(195264.000000,174132.000000,74400.000000,38.556453)}
{pt3dadd(195372.000000,173784.000000,74775.000000,47.921990)}

{create adhoc18}
{access adhoc18}
{connect adhoc18(1), adhoc17(0)}
{nseg = 1}
{strdef color color = "White"}
{pt3dclear()}
{pt3dadd(195372.000000,173784.000000,74775.000000,47.921990)}
{pt3dadd(195792.000000,173556.000000,75075.000000,27.567050)}
{pt3dadd(195984.000000,173328.000000,75175.000000,17.140230)}
{pt3dadd(196200.000000,173100.000000,75175.000000,15.542830)}
{pt3dadd(196284.000000,172848.000000,75375.000000,9.186998)}
{pt3dadd(196500.000000,172608.000000,75450.000000,9.186998)}
{pt3dadd(196692.000000,172320.000000,75575.000000,9.186998)}
{pt3dadd(196932.000000,172008.000000,75800.000000,18.471396)}
{pt3dadd(197040.000000,171648.000000,75975.000000,20.068796)}
{pt3dadd(196992.000000,171288.000000,75975.000000,29.353194)}
{pt3dadd(197004.000000,170952.000000,76150.000000,47.921990)}
{pt3dadd(197064.000000,170748.000000,76150.000000,47.921990)}

{create adhoc19}
{access adhoc19}
{connect adhoc19(1), adhoc18(0)}
{nseg = 1}
{strdef color color = "White"}
{pt3dclear()}
{pt3dadd(197064.000000,170748.000000,76150.000000,47.921990)}
{pt3dadd(197196.000000,170424.000000,76225.000000,32.447993)}
{pt3dadd(197328.000000,170124.000000,76275.000000,20.068796)}
{pt3dadd(197544.000000,169800.000000,76400.000000,20.068796)}
{pt3dadd(197604.000000,169392.000000,76425.000000,10.784398)}
{pt3dadd(197928.000000,169080.000000,76550.000000,10.784398)}
{pt3dadd(198036.000000,168804.000000,76800.000000,10.784398)}
{pt3dadd(198264.000000,168480.000000,76725.000000,18.471396)}
{pt3dadd(198324.000000,168180.000000,76950.000000,16.554517)}
{pt3dadd(198456.000000,167976.000000,76825.000000,25.838915)}
{pt3dadd(198540.000000,167736.000000,77025.000000,42.064858)}
{pt3dadd(198732.000000,167508.000000,76975.000000,47.921990)}

{create adhoc20}
{access adhoc20}
{connect adhoc20(1), adhoc19(0)}
{nseg = 1}
{strdef color color = "White"}
{pt3dclear()}
{pt3dadd(198732.000000,167508.000000,76975.000000,47.921990)}
{pt3dadd(198840.000000,167304.000000,77075.000000,29.785660)}
{pt3dadd(198816.000000,166908.000000,77025.000000,18.471396)}
{pt3dadd(198948.000000,166560.000000,77075.000000,18.471396)}
{pt3dadd(198960.000000,166140.000000,76950.000000,20.068796)}
{pt3dadd(198996.000000,165828.000000,77000.000000,32.447993)}
{pt3dadd(199080.000000,165408.000000,76925.000000,47.921990)}

{create adhoc21}
{access adhoc21}
{connect adhoc21(1), adhoc20(0)}
{nseg = 1}
{strdef color color = "White"}
{pt3dclear()}
{pt3dadd(199080.000000,165408.000000,76925.000000,47.921990)}
{pt3dadd(199008.000000,165168.000000,77025.000000,32.447993)}
{pt3dadd(199068.000000,164856.000000,77000.000000,20.068796)}
{pt3dadd(199080.000000,164556.000000,76925.000000,20.068796)}
{pt3dadd(199116.000000,164208.000000,77050.000000,20.068796)}
{pt3dadd(199092.000000,163824.000000,77075.000000,28.969818)}
{pt3dadd(199128.000000,163440.000000,77175.000000,47.283029)}
{pt3dadd(199140.000000,163212.000000,77075.000000,46.005108)}

{create adhoc22}
{access adhoc22}
{connect adhoc22(1), adhoc21(0)}
{nseg = 1}
{strdef color color = "White"}
{pt3dclear()}
{pt3dadd(199140.000000,163212.000000,77075.000000,46.005108)}
{pt3dadd(199020.000000,162840.000000,77350.000000,31.170072)}
{pt3dadd(198948.000000,162360.000000,77400.000000,19.302043)}
{pt3dadd(198852.000000,162048.000000,77475.000000,18.088020)}
{pt3dadd(198780.000000,161616.000000,77525.000000,9.186998)}
{pt3dadd(198732.000000,161340.000000,77525.000000,9.186998)}
{pt3dadd(198684.000000,160824.000000,77550.000000,15.542830)}
{pt3dadd(198696.000000,160560.000000,77750.000000,21.898662)}
{pt3dadd(198756.000000,160140.000000,77700.000000,22.686107)}
{pt3dadd(198708.000000,160056.000000,77650.000000,33.279160)}

{create adhoc23}
{access adhoc23}
{connect adhoc23(1), adhoc22(0)}
{nseg = 1}
{strdef color color = "White"}
{pt3dclear()}
{pt3dadd(198708.000000,160056.000000,77650.000000,33.279160)}
{pt3dadd(198816.000000,159768.000000,77550.000000,24.904717)}
{pt3dadd(198876.000000,159396.000000,77625.000000,15.542830)}
{pt3dadd(199008.000000,159132.000000,77600.000000,16.873996)}
{pt3dadd(199092.000000,158676.000000,77675.000000,9.186998)}
{pt3dadd(199020.000000,158388.000000,77750.000000,9.186998)}
{pt3dadd(199128.000000,158100.000000,77650.000000,9.186998)}
{pt3dadd(199080.000000,157824.000000,77875.000000,18.471396)}
{pt3dadd(199140.000000,157428.000000,77875.000000,20.068796)}
{pt3dadd(199092.000000,157152.000000,77900.000000,32.447993)}
{pt3dadd(199128.000000,156948.000000,77775.000000,47.921990)}

{create adhoc24}
{access adhoc24}
{connect adhoc24(1), adhoc23(0)}
{nseg = 1}
{strdef color color = "White"}
{pt3dclear()}
{pt3dadd(199128.000000,156948.000000,77775.000000,47.921990)}
{pt3dadd(199164.000000,156552.000000,77950.000000,32.447993)}
{pt3dadd(199356.000000,156168.000000,77950.000000,20.068796)}
{pt3dadd(199440.000000,155700.000000,78075.000000,18.471396)}
{pt3dadd(199524.000000,155256.000000,78150.000000,9.186998)}
{pt3dadd(199584.000000,154920.000000,78075.000000,9.186998)}
{pt3dadd(199560.000000,154608.000000,78050.000000,9.186998)}
{pt3dadd(199572.000000,154332.000000,78025.000000,15.542830)}
{pt3dadd(199368.000000,153996.000000,77975.000000,7.855832)}
{pt3dadd(199272.000000,153648.000000,77975.000000,7.855832)}
{pt3dadd(199092.000000,153156.000000,77950.000000,7.855832)}
{pt3dadd(199068.000000,152712.000000,77925.000000,14.211664)}
{pt3dadd(198864.000000,152316.000000,77875.000000,7.855832)}
{pt3dadd(198792.000000,151908.000000,77850.000000,7.855832)}
{pt3dadd(198744.000000,151596.000000,77775.000000,7.855832)}
{pt3dadd(198600.000000,151116.000000,77800.000000,15.542830)}
{pt3dadd(198612.000000,150696.000000,77650.000000,9.186998)}
{pt3dadd(198588.000000,150228.000000,77425.000000,9.186998)}
{pt3dadd(198600.000000,149880.000000,77475.000000,18.471396)}
{pt3dadd(198660.000000,149508.000000,77250.000000,24.827228)}
{pt3dadd(198516.000000,149160.000000,77275.000000,27.567050)}
{pt3dadd(198552.000000,148752.000000,77450.000000,33.279160)}

{create adhoc25}
{access adhoc25}
{connect adhoc25(1), adhoc24(0)}
{nseg = 1}
{strdef color color = "White"}
{pt3dclear()}
{pt3dadd(198552.000000,148752.000000,77450.000000,33.279160)}
{pt3dadd(198684.000000,148536.000000,77375.000000,22.686107)}
{pt3dadd(198636.000000,148248.000000,77375.000000,14.211664)}
{pt3dadd(198720.000000,147996.000000,77425.000000,12.177937)}
{pt3dadd(198888.000000,147600.000000,77700.000000,5.822105)}
{pt3dadd(198924.000000,147204.000000,77875.000000,5.822105)}
{pt3dadd(198960.000000,146892.000000,77975.000000,5.822105)}
{pt3dadd(199044.000000,146544.000000,78150.000000,10.144211)}
{pt3dadd(199080.000000,146184.000000,78050.000000,5.822105)}
{pt3dadd(199164.000000,145764.000000,77975.000000,5.822105)}
{pt3dadd(199248.000000,145452.000000,77950.000000,5.822105)}
{pt3dadd(199176.000000,145128.000000,77850.000000,12.177937)}
{pt3dadd(199416.000000,144732.000000,77825.000000,7.855832)}
{pt3dadd(199344.000000,144468.000000,77725.000000,7.855832)}
{pt3dadd(199248.000000,144192.000000,77675.000000,7.855832)}
{pt3dadd(199224.000000,143820.000000,77900.000000,15.542830)}
{pt3dadd(199176.000000,143556.000000,77950.000000,9.186998)}
{pt3dadd(199056.000000,143184.000000,78025.000000,9.186998)}
{pt3dadd(199032.000000,142848.000000,78050.000000,9.186998)}
{pt3dadd(199008.000000,142512.000000,78325.000000,18.088020)}
{pt3dadd(199020.000000,142188.000000,78300.000000,19.685420)}
{pt3dadd(198996.000000,141864.000000,78350.000000,27.372418)}
{pt3dadd(199008.000000,141612.000000,78475.000000,44.620697)}
{pt3dadd(198936.000000,141516.000000,78400.000000,39.934990)}

{create adhoc26}
{access adhoc26}
{connect adhoc26(1), adhoc25(0)}
{nseg = 1}
{strdef color color = "White"}
{pt3dclear()}
{pt3dadd(198936.000000,141516.000000,78400.000000,39.934990)}
{pt3dadd(198708.000000,141132.000000,78350.000000,27.123327)}
{pt3dadd(198612.000000,140844.000000,78275.000000,16.873996)}
{pt3dadd(198564.000000,140616.000000,78250.000000,14.433524)}
{pt3dadd(198540.000000,140364.000000,78150.000000,6.746526)}
{pt3dadd(198516.000000,140124.000000,78200.000000,6.746526)}
{pt3dadd(198600.000000,139908.000000,78275.000000,6.746526)}
{pt3dadd(198612.000000,139608.000000,78250.000000,13.102358)}
{pt3dadd(198492.000000,139332.000000,78275.000000,13.945430)}
{pt3dadd(198420.000000,138984.000000,78150.000000,20.301262)}
{pt3dadd(198456.000000,138744.000000,78175.000000,32.835437)}
{pt3dadd(198336.000000,138504.000000,78150.000000,33.279160)}

{create adhoc27}
{access adhoc27}
{connect adhoc27(1), adhoc26(0)}
{nseg = 1}
{strdef color color = "White"}
{pt3dclear()}
{pt3dadd(198336.000000,138504.000000,78150.000000,33.279160)}
{pt3dadd(198312.000000,138336.000000,78075.000000,22.686107)}
{pt3dadd(198240.000000,138096.000000,77975.000000,14.211664)}
{pt3dadd(198252.000000,137808.000000,78050.000000,12.177937)}
{pt3dadd(198204.000000,137556.000000,77925.000000,5.822105)}
{pt3dadd(198084.000000,137280.000000,77925.000000,5.822105)}
{pt3dadd(198012.000000,136980.000000,77825.000000,5.822105)}
{pt3dadd(197916.000000,136692.000000,77850.000000,11.068632)}
{pt3dadd(197796.000000,136404.000000,77700.000000,6.746526)}
{pt3dadd(197772.000000,136128.000000,77700.000000,6.746526)}
{pt3dadd(197784.000000,135948.000000,77675.000000,6.746526)}
{pt3dadd(197580.000000,135696.000000,77625.000000,11.771192)}
{pt3dadd(197508.000000,135432.000000,77525.000000,6.524665)}
{pt3dadd(197412.000000,135264.000000,77525.000000,6.524665)}
{pt3dadd(197316.000000,134988.000000,77600.000000,6.524665)}
{pt3dadd(197196.000000,134700.000000,77575.000000,10.846771)}
{pt3dadd(197148.000000,134496.000000,77525.000000,5.822105)}
{pt3dadd(196944.000000,134088.000000,77425.000000,5.822105)}
{pt3dadd(196704.000000,133572.000000,77275.000000,5.822105)}
{pt3dadd(196524.000000,132984.000000,77150.000000,12.177937)}
{pt3dadd(196308.000000,132336.000000,76900.000000,7.855832)}
{pt3dadd(196068.000000,131976.000000,76825.000000,7.855832)}
{pt3dadd(195912.000000,131568.000000,76900.000000,7.855832)}
{pt3dadd(195768.000000,131232.000000,77150.000000,11.993054)}
{pt3dadd(195720.000000,130956.000000,77250.000000,5.637222)}
{pt3dadd(195624.000000,130668.000000,77275.000000,5.637222)}
{pt3dadd(195576.000000,130452.000000,77375.000000,5.637222)}
{pt3dadd(195588.000000,130248.000000,77250.000000,9.959327)}
{pt3dadd(195564.000000,129924.000000,77300.000000,5.822105)}
{pt3dadd(195540.000000,129612.000000,77575.000000,5.822105)}
{pt3dadd(195492.000000,129336.000000,77425.000000,5.822105)}
{pt3dadd(195420.000000,129120.000000,77450.000000,10.144211)}
{pt3dadd(195396.000000,128820.000000,77525.000000,5.822105)}
{pt3dadd(195348.000000,128520.000000,77550.000000,5.822105)}
{pt3dadd(195300.000000,128352.000000,77575.000000,5.822105)}
{pt3dadd(195312.000000,128148.000000,77575.000000,10.144211)}
{pt3dadd(195240.000000,127896.000000,77600.000000,5.822105)}
{pt3dadd(195192.000000,127656.000000,77650.000000,5.822105)}
{pt3dadd(195144.000000,127404.000000,77675.000000,5.822105)}
{pt3dadd(195120.000000,127200.000000,77750.000000,10.144211)}
{pt3dadd(195024.000000,127008.000000,77675.000000,5.822105)}
{pt3dadd(195000.000000,126780.000000,77775.000000,5.822105)}
{pt3dadd(194976.000000,126528.000000,77850.000000,5.822105)}
{pt3dadd(194880.000000,126276.000000,77975.000000,10.144211)}
{pt3dadd(194808.000000,126000.000000,78050.000000,5.822105)}
{pt3dadd(194784.000000,125760.000000,78125.000000,5.822105)}
{pt3dadd(194844.000000,125496.000000,78150.000000,5.822105)}
{pt3dadd(194700.000000,125220.000000,78225.000000,11.068632)}
{pt3dadd(194652.000000,124920.000000,78275.000000,6.746526)}
{pt3dadd(194556.000000,124668.000000,78325.000000,11.993053)}
{pt3dadd(194640.000000,124380.000000,78425.000000,16.315158)}
{pt3dadd(194616.000000,124128.000000,78475.000000,17.447720)}
{pt3dadd(194628.000000,123876.000000,78425.000000,23.110527)}

{create adhoc28}
{access adhoc28}
{connect adhoc28(1), adhoc27(0)}
{nseg = 1}
{strdef color color = "White"}
{pt3dclear()}
{pt3dadd(194628.000000,123876.000000,78425.000000,23.110527)}
{pt3dadd(194508.000000,123660.000000,78100.000000,14.623100)}
{pt3dadd(194616.000000,123408.000000,78125.000000,9.373860)}
{pt3dadd(194592.000000,123108.000000,78150.000000,8.603509)}
{pt3dadd(194568.000000,122832.000000,78175.000000,5.051754)}
{pt3dadd(194580.000000,122580.000000,78075.000000,5.051754)}
{pt3dadd(194556.000000,122328.000000,78000.000000,5.051754)}
{pt3dadd(194592.000000,122136.000000,77975.000000,9.373860)}
{pt3dadd(194604.000000,121860.000000,78150.000000,5.822105)}
{pt3dadd(194508.000000,121656.000000,78100.000000,5.822105)}
{pt3dadd(194484.000000,121464.000000,78150.000000,5.822105)}
{pt3dadd(194460.000000,121236.000000,78200.000000,9.219790)}
{pt3dadd(194496.000000,120996.000000,78275.000000,4.897684)}
{pt3dadd(194532.000000,120792.000000,78200.000000,4.897684)}
{pt3dadd(194640.000000,120528.000000,78275.000000,4.897684)}
{pt3dadd(194544.000000,120324.000000,78325.000000,8.449439)}
{pt3dadd(194472.000000,120084.000000,78375.000000,5.051754)}
{pt3dadd(194424.000000,119892.000000,78475.000000,5.051754)}
{pt3dadd(194376.000000,119724.000000,78400.000000,5.051754)}
{pt3dadd(194436.000000,119532.000000,78425.000000,8.603509)}
{pt3dadd(194472.000000,119280.000000,78450.000000,5.051754)}
{pt3dadd(194556.000000,119064.000000,78475.000000,5.051754)}
{pt3dadd(194616.000000,118872.000000,78400.000000,5.051754)}
{pt3dadd(194628.000000,118644.000000,78450.000000,8.603509)}
{pt3dadd(194604.000000,118416.000000,78500.000000,5.051754)}
{pt3dadd(194460.000000,118200.000000,78300.000000,5.051754)}
{pt3dadd(194472.000000,118008.000000,78325.000000,5.051754)}
{pt3dadd(194448.000000,117804.000000,78275.000000,9.373860)}
{pt3dadd(194376.000000,117636.000000,78525.000000,5.822105)}
{pt3dadd(194400.000000,117432.000000,78550.000000,5.822105)}
{pt3dadd(194208.000000,117144.000000,78675.000000,5.822105)}
{pt3dadd(194064.000000,116880.000000,78675.000000,10.144211)}
{pt3dadd(193920.000000,116640.000000,78650.000000,5.822105)}
{pt3dadd(193836.000000,116400.000000,78750.000000,5.822105)}
{pt3dadd(193692.000000,116148.000000,79000.000000,10.144211)}
{pt3dadd(193548.000000,115884.000000,79200.000000,15.390737)}
{pt3dadd(193356.000000,115572.000000,79300.000000,17.447720)}
{pt3dadd(193236.000000,115320.000000,79450.000000,27.732632)}

{create adhoc29}
{access adhoc29}
{connect adhoc29(1), adhoc28(0)}
{nseg = 1}
{strdef color color = "White"}
{pt3dclear()}
{pt3dadd(193236.000000,115320.000000,79450.000000,27.732632)}
{pt3dadd(193200.000000,115176.000000,79400.000000,17.447720)}
{pt3dadd(193236.000000,114936.000000,79575.000000,11.068632)}
{pt3dadd(193224.000000,114684.000000,79700.000000,9.373860)}
{pt3dadd(193248.000000,114504.000000,79950.000000,5.051754)}
{pt3dadd(193176.000000,114264.000000,80125.000000,5.051754)}
{pt3dadd(193176.000000,114036.000000,80325.000000,5.051754)}
{pt3dadd(193128.000000,113868.000000,80350.000000,7.961550)}
{pt3dadd(193116.000000,113592.000000,80500.000000,4.409795)}
{pt3dadd(193044.000000,113220.000000,80825.000000,4.409795)}
{pt3dadd(192936.000000,112728.000000,81100.000000,4.409795)}
{pt3dadd(192960.000000,112392.000000,81350.000000,8.731901)}
{pt3dadd(192876.000000,111852.000000,81700.000000,5.822105)}
{pt3dadd(192756.000000,111528.000000,81975.000000,5.822105)}
{pt3dadd(192624.000000,111384.000000,82250.000000,5.822105)}
{pt3dadd(192372.000000,110916.000000,82625.000000,10.144211)}
{pt3dadd(192180.000000,110796.000000,83000.000000,5.822105)}
{pt3dadd(192132.000000,110496.000000,83375.000000,5.822105)}
{pt3dadd(191856.000000,110040.000000,83725.000000,5.822105)}
{pt3dadd(191448.000000,109356.000000,84175.000000,12.177937)}
{pt3dadd(191340.000000,109308.000000,84500.000000,7.855832)}
{pt3dadd(191472.000000,109272.000000,84900.000000,7.855832)}
{pt3dadd(191436.000000,109224.000000,85275.000000,7.855832)}
{pt3dadd(191436.000000,109260.000000,85650.000000,13.102358)}
{pt3dadd(191472.000000,109224.000000,85925.000000,6.746526)}
{pt3dadd(191388.000000,109104.000000,86175.000000,6.746526)}
{pt3dadd(191424.000000,109092.000000,86375.000000,6.746526)}
{pt3dadd(191556.000000,109092.000000,86650.000000,12.836126)}
{pt3dadd(191652.000000,109020.000000,86950.000000,7.589600)}
{pt3dadd(191712.000000,109092.000000,87300.000000,13.945432)}
{pt3dadd(191772.000000,109200.000000,87650.000000,21.632430)}
{pt3dadd(191724.000000,109308.000000,88000.000000,24.904717)}
{pt3dadd(191820.000000,109308.000000,88325.000000,39.934990)}

{create adhoc30}
{access adhoc30}
{connect adhoc30(1), adhoc29(0)}
{nseg = 1}
{strdef color color = "White"}
{pt3dclear()}
{pt3dadd(191820.000000,109308.000000,88325.000000,39.934990)}
{pt3dadd(191844.000000,110112.000000,88550.000000,18.269712)}
{pt3dadd(191844.000000,110292.000000,88600.000000,11.561827)}
{pt3dadd(191832.000000,110448.000000,88675.000000,6.249659)}
{pt3dadd(191856.000000,110604.000000,88700.000000,3.874829)}
{pt3dadd(191784.000000,110784.000000,88725.000000,3.874829)}
{pt3dadd(191736.000000,110988.000000,88725.000000,3.874829)}
{pt3dadd(191796.000000,111108.000000,88675.000000,7.426584)}
{pt3dadd(191820.000000,111336.000000,88775.000000,5.051754)}
{pt3dadd(191820.000000,111528.000000,88875.000000,5.051754)}
{pt3dadd(191820.000000,111768.000000,88950.000000,5.051754)}
{pt3dadd(191820.000000,111948.000000,89100.000000,6.609275)}
{pt3dadd(191844.000000,112116.000000,89150.000000,3.057520)}
{pt3dadd(191844.000000,112308.000000,89200.000000,3.057520)}
{pt3dadd(191880.000000,112488.000000,89250.000000,3.057520)}
{pt3dadd(191952.000000,112704.000000,89275.000000,4.305454)}
{pt3dadd(192012.000000,112884.000000,89325.000000,2.747934)}
{pt3dadd(192036.000000,113064.000000,89325.000000,2.747934)}
{pt3dadd(191928.000000,113244.000000,89325.000000,2.747934)}
{pt3dadd(191952.000000,113412.000000,89300.000000,5.657729)}
{pt3dadd(191904.000000,113580.000000,89100.000000,4.409795)}
{pt3dadd(191832.000000,113808.000000,89025.000000,5.184749)}
{pt3dadd(191892.000000,113952.000000,89125.000000,5.959703)}
{pt3dadd(191952.000000,114132.000000,89150.000000,4.083180)}
{pt3dadd(191940.000000,114420.000000,89300.000000,5.374770)}

{create adhoc31}
{access adhoc31}
{connect adhoc31(1), adhoc29(0)}
{nseg = 1}
{strdef color color = "White"}
{pt3dclear()}
{pt3dadd(191820.000000,109308.000000,88325.000000,39.934990)}
{pt3dadd(191484.000000,109020.000000,88425.000000,20.231254)}
{pt3dadd(191340.000000,108816.000000,88700.000000,12.738752)}
{pt3dadd(191124.000000,108840.000000,89100.000000,7.961550)}
{pt3dadd(191016.000000,108684.000000,89425.000000,4.409795)}
{pt3dadd(190656.000000,108600.000000,89800.000000,4.409795)}
{pt3dadd(190500.000000,108564.000000,90225.000000,4.409795)}
{pt3dadd(190416.000000,108624.000000,90525.000000,5.967316)}
{pt3dadd(190308.000000,108540.000000,90825.000000,3.057520)}
{pt3dadd(190164.000000,108384.000000,91250.000000,4.305454)}
{pt3dadd(190236.000000,108276.000000,91550.000000,5.295399)}
{pt3dadd(190260.000000,108384.000000,91875.000000,5.229798)}
{pt3dadd(190332.000000,108696.000000,92175.000000,6.449724)}

{create adhoc32}
{access adhoc32}
{connect adhoc32(1), adhoc28(0)}
{nseg = 1}
{strdef color color = "White"}
{pt3dclear()}
{pt3dadd(193236.000000,115320.000000,79450.000000,27.732632)}
{pt3dadd(192444.000000,115380.000000,78550.000000,16.798127)}
{pt3dadd(192264.000000,115212.000000,78100.000000,10.133806)}
{pt3dadd(192168.000000,115056.000000,78125.000000,7.739669)}

{create adhoc33}
{access adhoc33}
{connect adhoc33(1), adhoc27(0)}
{nseg = 1}
{strdef color color = "White"}
{pt3dclear()}
{pt3dadd(194628.000000,123876.000000,78425.000000,23.110527)}
{pt3dadd(194424.000000,123948.000000,79300.000000,11.918550)}
{pt3dadd(194532.000000,123732.000000,79975.000000,7.751130)}
{pt3dadd(194664.000000,123636.000000,80475.000000,5.803854)}
{pt3dadd(194676.000000,123456.000000,80675.000000,3.874829)}
{pt3dadd(194532.000000,123276.000000,80850.000000,3.874829)}
{pt3dadd(194388.000000,123144.000000,80875.000000,3.874829)}
{pt3dadd(195024.000000,123684.000000,81250.000000,5.803854)}
{pt3dadd(195276.000000,123900.000000,81600.000000,3.429025)}
{pt3dadd(195600.000000,124308.000000,81950.000000,3.429025)}
{pt3dadd(195768.000000,124656.000000,82300.000000,3.429025)}
{pt3dadd(195792.000000,124752.000000,82500.000000,5.803854)}
{pt3dadd(195876.000000,124896.000000,82675.000000,5.432350)}
{pt3dadd(195804.000000,125028.000000,82675.000000,8.053916)}
{pt3dadd(196560.000000,125628.000000,83350.000000,9.287602)}

{create adhoc34}
{access adhoc34}
{connect adhoc34(1), adhoc26(0)}
{nseg = 1}
{strdef color color = "White"}
{pt3dclear()}
{pt3dadd(198336.000000,138504.000000,78150.000000,33.279160)}
{pt3dadd(198312.000000,138480.000000,79050.000000,16.051102)}
{pt3dadd(198132.000000,138276.000000,79300.000000,10.230661)}
{pt3dadd(197832.000000,138108.000000,79575.000000,5.803854)}
{pt3dadd(197652.000000,137940.000000,79825.000000,3.429025)}
{pt3dadd(197652.000000,137784.000000,79925.000000,3.429025)}
{pt3dadd(197712.000000,137520.000000,80625.000000,3.429025)}
{pt3dadd(197772.000000,137316.000000,80800.000000,3.988988)}
{pt3dadd(197700.000000,137124.000000,81075.000000,2.059963)}
{pt3dadd(197760.000000,136944.000000,81175.000000,2.834917)}
{pt3dadd(198048.000000,136908.000000,81525.000000,3.609871)}
{pt3dadd(198372.000000,136812.000000,81750.000000,4.083180)}
{pt3dadd(198552.000000,136536.000000,81975.000000,5.374770)}

{create adhoc35}
{access adhoc35}
{connect adhoc35(1), adhoc25(0)}
{nseg = 1}
{strdef color color = "White"}
{pt3dclear()}
{pt3dadd(198936.000000,141516.000000,78400.000000,39.934990)}
{pt3dadd(199068.000000,141672.000000,81025.000000,19.161322)}
{pt3dadd(199152.000000,141828.000000,81250.000000,12.096793)}
{pt3dadd(199188.000000,142080.000000,81700.000000,10.765627)}
{pt3dadd(199008.000000,142260.000000,82100.000000,12.177937)}
{pt3dadd(199044.000000,142464.000000,82600.000000,14.106962)}
{pt3dadd(199140.000000,142632.000000,82525.000000,22.511603)}
{pt3dadd(199092.000000,142800.000000,82500.000000,11.145123)}

{create adhoc36}
{access adhoc36}
{connect adhoc36(1), adhoc24(0)}
{nseg = 1}
{strdef color color = "White"}
{pt3dclear()}
{pt3dadd(198552.000000,148752.000000,77450.000000,33.279160)}
{pt3dadd(197988.000000,148752.000000,78525.000000,16.942712)}
{pt3dadd(197940.000000,148632.000000,78800.000000,10.765627)}
{pt3dadd(198000.000000,148584.000000,79225.000000,7.319591)}
{pt3dadd(198084.000000,148812.000000,79800.000000,4.409795)}
{pt3dadd(198108.000000,149100.000000,80325.000000,4.409795)}
{pt3dadd(198084.000000,149160.000000,80700.000000,4.409795)}
{pt3dadd(198144.000000,149424.000000,81025.000000,7.319591)}
{pt3dadd(198336.000000,149616.000000,81350.000000,4.409795)}
{pt3dadd(198468.000000,149964.000000,81775.000000,4.409795)}
{pt3dadd(198468.000000,150072.000000,82100.000000,4.409795)}
{pt3dadd(198600.000000,150264.000000,82500.000000,6.338820)}
{pt3dadd(198864.000000,150552.000000,82825.000000,3.429025)}
{pt3dadd(198924.000000,150660.000000,83150.000000,3.429025)}
{pt3dadd(199092.000000,150744.000000,83500.000000,3.429025)}
{pt3dadd(199284.000000,150780.000000,83775.000000,4.986545)}
{pt3dadd(199680.000000,150708.000000,84125.000000,4.305454)}
{pt3dadd(199764.000000,150528.000000,84375.000000,5.295399)}
{pt3dadd(199968.000000,150696.000000,84175.000000,7.825665)}
{pt3dadd(199536.000000,150984.000000,83925.000000,6.449724)}

{create adhoc37}
{access adhoc37}
{connect adhoc37(1), adhoc23(0)}
{nseg = 1}
{strdef color color = "White"}
{pt3dclear()}
{pt3dadd(199128.000000,156948.000000,77775.000000,47.921990)}
{pt3dadd(197988.000000,156948.000000,77000.000000,19.569864)}
{pt3dadd(197532.000000,156456.000000,76775.000000,12.341918)}
{pt3dadd(197196.000000,156156.000000,76475.000000,4.986545)}
{pt3dadd(196944.000000,156072.000000,76150.000000,3.429025)}
{pt3dadd(196560.000000,155772.000000,75825.000000,6.980779)}
{pt3dadd(196512.000000,155652.000000,75425.000000,11.391702)}
{pt3dadd(196284.000000,155604.000000,75525.000000,14.771130)}
{pt3dadd(195960.000000,155400.000000,75500.000000,23.554617)}

{create adhoc38}
{access adhoc38}
{connect adhoc38(1), adhoc22(0)}
{nseg = 1}
{strdef color color = "White"}
{pt3dclear()}
{pt3dadd(198708.000000,160056.000000,77650.000000,33.279160)}
{pt3dadd(197880.000000,160056.000000,78450.000000,13.384643)}
{pt3dadd(197736.000000,159804.000000,78700.000000,8.630786)}
{pt3dadd(197556.000000,159840.000000,78800.000000,5.826708)}
{pt3dadd(197352.000000,159792.000000,78925.000000,5.051754)}
{pt3dadd(197256.000000,159852.000000,79275.000000,5.051754)}
{pt3dadd(197268.000000,159540.000000,79575.000000,5.826708)}
{pt3dadd(197148.000000,159204.000000,79675.000000,6.273204)}
{pt3dadd(196692.000000,158952.000000,79750.000000,3.535750)}
{pt3dadd(196440.000000,158736.000000,79775.000000,3.732480)}

{create adhoc39}
{access adhoc39}
{connect adhoc39(1), adhoc21(0)}
{nseg = 1}
{strdef color color = "White"}
{pt3dclear()}
{pt3dadd(199140.000000,163212.000000,77075.000000,46.005108)}
{pt3dadd(197376.000000,163212.000000,75775.000000,18.977936)}
{pt3dadd(197232.000000,162984.000000,75800.000000,5.434490)}
{pt3dadd(197184.000000,162804.000000,75725.000000,5.374770)}

{create adhoc40}
{access adhoc40}
{connect adhoc40(1), adhoc20(0)}
{nseg = 1}
{strdef color color = "White"}
{pt3dclear()}
{pt3dadd(199080.000000,165408.000000,76925.000000,47.921990)}
{pt3dadd(197868.000000,165420.000000,77800.000000,20.189038)}
{pt3dadd(197232.000000,165264.000000,78275.000000,12.713423)}
{pt3dadd(196980.000000,165048.000000,78350.000000,4.418969)}
{pt3dadd(196680.000000,164844.000000,78425.000000,2.489945)}
{pt3dadd(196464.000000,164616.000000,78500.000000,2.489945)}
{pt3dadd(196416.000000,164400.000000,78625.000000,2.489945)}
{pt3dadd(196344.000000,164184.000000,78725.000000,4.047465)}
{pt3dadd(196200.000000,163944.000000,78775.000000,3.057520)}
{pt3dadd(196116.000000,163716.000000,78800.000000,3.057520)}
{pt3dadd(195972.000000,163512.000000,78825.000000,4.986545)}
{pt3dadd(195684.000000,163332.000000,78850.000000,6.544065)}
{pt3dadd(195324.000000,163164.000000,78925.000000,7.310908)}
{pt3dadd(195648.000000,162912.000000,79275.000000,9.287602)}

{create adhoc41}
{access adhoc41}
{connect adhoc41(1), adhoc19(0)}
{nseg = 1}
{strdef color color = "White"}
{pt3dclear()}
{pt3dadd(198732.000000,167508.000000,76975.000000,47.921990)}
{pt3dadd(197748.000000,167508.000000,77850.000000,19.569864)}
{pt3dadd(197496.000000,167364.000000,78350.000000,14.716748)}
{pt3dadd(197496.000000,167172.000000,78575.000000,6.989870)}
{pt3dadd(197520.000000,167148.000000,78900.000000,8.053916)}
{pt3dadd(197544.000000,167028.000000,79250.000000,9.287602)}

{create adhoc42}
{access adhoc42}
{connect adhoc42(1), adhoc18(0)}
{nseg = 1}
{strdef color color = "White"}
{pt3dclear()}
{pt3dadd(197064.000000,170748.000000,76150.000000,47.921990)}
{pt3dadd(195768.000000,170640.000000,76975.000000,19.569864)}
{pt3dadd(195576.000000,170496.000000,77100.000000,12.341918)}
{pt3dadd(195252.000000,170640.000000,77425.000000,4.540740)}
{pt3dadd(195096.000000,170856.000000,77675.000000,5.358049)}
{pt3dadd(194856.000000,171240.000000,77925.000000,6.915569)}
{pt3dadd(194844.000000,171384.000000,78200.000000,10.525949)}
{pt3dadd(194964.000000,171408.000000,78500.000000,9.287602)}

{create adhoc43}
{access adhoc43}
{connect adhoc43(1), adhoc17(0)}
{nseg = 1}
{strdef color color = "White"}
{pt3dclear()}
{pt3dadd(195372.000000,173784.000000,74775.000000,47.921990)}
{pt3dadd(195168.000000,173700.000000,72575.000000,22.893587)}
{pt3dadd(195168.000000,173124.000000,72100.000000,14.336152)}
{pt3dadd(194976.000000,172872.000000,71750.000000,11.407586)}
{pt3dadd(194784.000000,172620.000000,71150.000000,7.855832)}
{pt3dadd(194556.000000,172572.000000,70825.000000,7.855832)}
{pt3dadd(194352.000000,172464.000000,70750.000000,15.223351)}
{pt3dadd(194148.000000,172380.000000,70475.000000,22.590869)}
{pt3dadd(193920.000000,172428.000000,70125.000000,26.058394)}
{pt3dadd(193764.000000,172464.000000,69625.000000,38.337590)}

{create adhoc44}
{access adhoc44}
{connect adhoc44(1), adhoc43(0)}
{nseg = 1}
{strdef color color = "White"}
{pt3dclear()}
{pt3dadd(193764.000000,172464.000000,69625.000000,38.337590)}
{pt3dadd(193572.000000,172476.000000,69400.000000,24.372250)}
{pt3dadd(193368.000000,172464.000000,69150.000000,15.223350)}
{pt3dadd(193128.000000,172428.000000,68800.000000,11.993053)}
{pt3dadd(192924.000000,172248.000000,68475.000000,8.012051)}
{pt3dadd(192756.000000,172212.000000,68150.000000,12.353418)}
{pt3dadd(192564.000000,171948.000000,67900.000000,13.374147)}

{create adhoc45}
{access adhoc45}
{connect adhoc45(1), adhoc44(0)}
{nseg = 1}
{strdef color color = "White"}
{pt3dclear()}
{pt3dadd(192564.000000,171948.000000,67900.000000,13.374147)}
{pt3dadd(192420.000000,171312.000000,67475.000000,11.377640)}
{pt3dadd(192252.000000,171120.000000,67225.000000,7.426584)}
{pt3dadd(192036.000000,170868.000000,66925.000000,8.449439)}
{pt3dadd(191844.000000,170712.000000,66725.000000,4.897684)}
{pt3dadd(191652.000000,170292.000000,66675.000000,4.897684)}
{pt3dadd(191472.000000,170040.000000,66625.000000,4.897684)}
{pt3dadd(191256.000000,169620.000000,66300.000000,8.449439)}
{pt3dadd(191088.000000,169572.000000,66250.000000,5.051754)}
{pt3dadd(190992.000000,169392.000000,66100.000000,5.051754)}
{pt3dadd(190764.000000,169128.000000,65850.000000,5.051754)}
{pt3dadd(190368.000000,168840.000000,65600.000000,10.298281)}
{pt3dadd(190332.000000,168600.000000,65450.000000,10.298281)}
{pt3dadd(190248.000000,168408.000000,65425.000000,16.163801)}
{pt3dadd(190308.000000,168216.000000,65525.000000,19.258772)}

{create adhoc46}
{access adhoc46}
{connect adhoc46(1), adhoc45(0)}
{nseg = 1}
{strdef color color = "White"}
{pt3dclear()}
{pt3dadd(190308.000000,168216.000000,65525.000000,19.258772)}
{pt3dadd(190332.000000,168036.000000,65600.000000,12.269250)}
{pt3dadd(190344.000000,167820.000000,65650.000000,7.961550)}
{pt3dadd(190296.000000,167592.000000,65500.000000,7.319591)}
{pt3dadd(190296.000000,167412.000000,65475.000000,4.409795)}
{pt3dadd(190248.000000,167196.000000,65400.000000,4.409795)}
{pt3dadd(190212.000000,167004.000000,65450.000000,4.409795)}
{pt3dadd(190176.000000,166800.000000,65475.000000,7.319591)}
{pt3dadd(190248.000000,166608.000000,65425.000000,4.409795)}
{pt3dadd(190392.000000,166404.000000,65300.000000,4.409795)}
{pt3dadd(190212.000000,166224.000000,65275.000000,4.409795)}
{pt3dadd(190212.000000,166092.000000,65225.000000,6.338820)}
{pt3dadd(190236.000000,165936.000000,65125.000000,3.429025)}
{pt3dadd(190236.000000,165732.000000,65225.000000,3.429025)}
{pt3dadd(190152.000000,165528.000000,65175.000000,3.429025)}
{pt3dadd(190176.000000,165300.000000,65200.000000,5.803854)}
{pt3dadd(190176.000000,165096.000000,65200.000000,3.874829)}
{pt3dadd(190128.000000,164892.000000,65200.000000,3.874829)}
{pt3dadd(190092.000000,164712.000000,65225.000000,3.874829)}
{pt3dadd(190152.000000,164496.000000,65400.000000,7.272514)}
{pt3dadd(190188.000000,164256.000000,65575.000000,4.897684)}
{pt3dadd(190224.000000,164028.000000,65600.000000,4.897684)}
{pt3dadd(190080.000000,163824.000000,65550.000000,4.897684)}
{pt3dadd(190044.000000,163584.000000,65475.000000,8.295368)}
{pt3dadd(190032.000000,163368.000000,65450.000000,4.897684)}
{pt3dadd(189912.000000,163164.000000,65525.000000,4.897684)}
{pt3dadd(189804.000000,162948.000000,65575.000000,4.897684)}
{pt3dadd(189792.000000,162744.000000,65500.000000,7.272513)}
{pt3dadd(189684.000000,162576.000000,65400.000000,3.874829)}
{pt3dadd(189684.000000,162432.000000,65375.000000,3.874829)}
{pt3dadd(189672.000000,162312.000000,65225.000000,3.874829)}
{pt3dadd(189696.000000,162108.000000,65150.000000,6.249659)}
{pt3dadd(189588.000000,161928.000000,65050.000000,3.874829)}
{pt3dadd(189684.000000,161748.000000,65000.000000,3.874829)}
{pt3dadd(189636.000000,161580.000000,64825.000000,3.874829)}
{pt3dadd(189564.000000,161376.000000,64600.000000,5.432350)}
{pt3dadd(189528.000000,161160.000000,64400.000000,3.057520)}
{pt3dadd(189456.000000,161004.000000,64275.000000,3.057520)}
{pt3dadd(189228.000000,160824.000000,64150.000000,4.305454)}
{pt3dadd(189192.000000,160668.000000,64000.000000,5.295399)}
{pt3dadd(188856.000000,160536.000000,63775.000000,5.229798)}
{pt3dadd(188712.000000,160356.000000,63575.000000,6.449724)}

{create adhoc47}
{access adhoc47}
{connect adhoc47(1), adhoc45(0)}
{nseg = 1}
{strdef color color = "White"}
{pt3dclear()}
{pt3dadd(190308.000000,168216.000000,65525.000000,19.258772)}
{pt3dadd(189708.000000,168276.000000,64650.000000,12.611325)}
{pt3dadd(188952.000000,168420.000000,64150.000000,9.287602)}

{create adhoc48}
{access adhoc48}
{connect adhoc48(1), adhoc44(0)}
{nseg = 1}
{strdef color color = "White"}
{pt3dclear()}
{pt3dadd(192564.000000,171948.000000,67900.000000,13.374147)}
{pt3dadd(192468.000000,172584.000000,68675.000000,9.416098)}
{pt3dadd(192300.000000,172788.000000,68625.000000,6.249659)}
{pt3dadd(192120.000000,172884.000000,68575.000000,5.803854)}
{pt3dadd(191988.000000,172872.000000,68500.000000,3.429025)}
{pt3dadd(191856.000000,172908.000000,68350.000000,3.429025)}
{pt3dadd(191676.000000,173004.000000,68225.000000,3.429025)}
{pt3dadd(191568.000000,172968.000000,68075.000000,6.338820)}
{pt3dadd(191400.000000,173148.000000,67825.000000,4.409795)}
{pt3dadd(191220.000000,173220.000000,67675.000000,6.338820)}
{pt3dadd(191040.000000,173148.000000,67550.000000,7.896340)}
{pt3dadd(190848.000000,173364.000000,67450.000000,7.310908)}
{pt3dadd(190548.000000,174108.000000,67050.000000,9.287602)}

{create adhoc49}
{access adhoc49}
{connect adhoc49(1), adhoc43(0)}
{nseg = 1}
{strdef color color = "White"}
{pt3dclear()}
{pt3dadd(193764.000000,172464.000000,69625.000000,38.337590)}
{pt3dadd(193764.000000,171660.000000,71175.000000,16.375064)}
{pt3dadd(193656.000000,171372.000000,71225.000000,10.425038)}
{pt3dadd(193488.000000,170868.000000,71300.000000,4.615041)}
{pt3dadd(193332.000000,170580.000000,71250.000000,3.057520)}
{pt3dadd(193152.000000,170388.000000,71425.000000,4.540740)}
{pt3dadd(192972.000000,170124.000000,71525.000000,6.915569)}
{pt3dadd(192852.000000,170040.000000,71475.000000,7.930082)}
{pt3dadd(192516.000000,169356.000000,72050.000000,13.374147)}
