# Supplementary material for: Full reconstruction of large lobula plate tangential cells in Drosophila from a 3D EM dataset
Source: PLoS One. 2018 Nov 28;13(11):e0207828. doi: 10.1371/journal.pone.0207828 (PMC6261601; doi:10.1371/journal.pone.0207828)
Supplement: S1 Dataset — (ZIP) [file pone.0207828.s001.zip › Diameter hoc/VS_VSL_preliminary/VS5_5skels_ck.001_completed.hoc0002.hoc]

/* created with convertKnossosNmlToHoc.m */

{create adhoc1}
{access adhoc1}
{nseg = 1}
{strdef color color = "White"}
{pt3dclear()}
{pt3dadd(158172.000000,134052.000000,182800.000000,1000.000000)}
{pt3dadd(158172.000000,134052.000000,179525.000000,346.612531)}
{pt3dadd(158172.000000,134088.000000,179150.000000,208.567519)}
{pt3dadd(158076.000000,134532.000000,178225.000000,20.068796)}
{pt3dadd(158256.000000,134712.000000,177400.000000,12.701277)}
{pt3dadd(158292.000000,134820.000000,176750.000000,12.701277)}
{pt3dadd(158220.000000,134988.000000,175825.000000,12.701277)}
{pt3dadd(158424.000000,135276.000000,174950.000000,23.902554)}
{pt3dadd(159228.000000,135528.000000,174350.000000,12.701277)}
{pt3dadd(159660.000000,136068.000000,173625.000000,12.701277)}
{pt3dadd(160020.000000,136356.000000,172900.000000,12.701277)}
{pt3dadd(160044.000000,137004.000000,172325.000000,26.202809)}
{pt3dadd(160320.000000,138192.000000,171500.000000,15.001532)}
{pt3dadd(160236.000000,138804.000000,170925.000000,15.001532)}
{pt3dadd(160212.000000,139800.000000,170125.000000,15.001532)}
{pt3dadd(159780.000000,141024.000000,169325.000000,28.503064)}
{pt3dadd(159648.000000,141528.000000,168750.000000,15.001532)}
{pt3dadd(159456.000000,142152.000000,168250.000000,15.001532)}
{pt3dadd(159396.000000,142212.000000,167775.000000,15.001532)}
{pt3dadd(158268.000000,143280.000000,167000.000000,28.503064)}
{pt3dadd(158112.000000,144684.000000,166275.000000,15.001532)}
{pt3dadd(157500.000000,145644.000000,165700.000000,15.001532)}
{pt3dadd(157476.000000,146160.000000,165200.000000,15.001532)}
{pt3dadd(157296.000000,146940.000000,164475.000000,28.503064)}
{pt3dadd(157032.000000,147564.000000,163825.000000,15.001532)}
{pt3dadd(156984.000000,148080.000000,163150.000000,15.001532)}
{pt3dadd(156348.000000,148704.000000,162375.000000,15.001532)}
{pt3dadd(156048.000000,149316.000000,161875.000000,28.503064)}
{pt3dadd(155436.000000,149736.000000,160925.000000,15.001532)}
{pt3dadd(154488.000000,150312.000000,160025.000000,15.001532)}
{pt3dadd(153792.000000,150708.000000,159250.000000,15.001532)}
{pt3dadd(154116.000000,151020.000000,158625.000000,28.503064)}
{pt3dadd(153852.000000,151188.000000,158050.000000,15.001532)}
{pt3dadd(153732.000000,151260.000000,157050.000000,15.001532)}
{pt3dadd(152724.000000,150720.000000,156225.000000,15.001532)}
{pt3dadd(152412.000000,149556.000000,155850.000000,26.202809)}
{pt3dadd(151800.000000,149556.000000,154325.000000,12.701277)}
{pt3dadd(151560.000000,149556.000000,152575.000000,12.701277)}
{pt3dadd(151596.000000,149556.000000,150550.000000,12.701277)}
{pt3dadd(152556.000000,149556.000000,149100.000000,20.388275)}
{pt3dadd(154968.000000,149556.000000,145775.000000,9.186998)}
{pt3dadd(155244.000000,149760.000000,145500.000000,9.186998)}
{pt3dadd(155136.000000,150024.000000,145750.000000,9.186998)}
{pt3dadd(156036.000000,150744.000000,145025.000000,19.928223)}
{pt3dadd(156180.000000,151272.000000,144900.000000,12.241225)}
{pt3dadd(156708.000000,151860.000000,144200.000000,12.241225)}
{pt3dadd(156948.000000,152448.000000,143850.000000,12.241225)}
{pt3dadd(156984.000000,152952.000000,143500.000000,25.742757)}
{pt3dadd(157236.000000,153276.000000,143275.000000,15.001532)}
{pt3dadd(157716.000000,153660.000000,143000.000000,15.001532)}
{pt3dadd(157956.000000,154224.000000,142625.000000,15.001532)}
{pt3dadd(158304.000000,154656.000000,142425.000000,28.503064)}
{pt3dadd(158340.000000,155160.000000,142325.000000,15.001532)}
{pt3dadd(158556.000000,155556.000000,142075.000000,15.001532)}
{pt3dadd(158688.000000,155892.000000,141775.000000,15.001532)}
{pt3dadd(158784.000000,156300.000000,141700.000000,28.503064)}
{pt3dadd(158808.000000,156756.000000,141600.000000,15.001532)}
{pt3dadd(158784.000000,157188.000000,141450.000000,15.001532)}
{pt3dadd(158880.000000,157476.000000,141150.000000,15.001532)}
{pt3dadd(158952.000000,157812.000000,140975.000000,27.951002)}
{pt3dadd(158940.000000,158184.000000,140825.000000,14.449470)}
{pt3dadd(159000.000000,158628.000000,140675.000000,14.449470)}
{pt3dadd(159036.000000,159060.000000,140375.000000,14.449470)}
{pt3dadd(158940.000000,159528.000000,140100.000000,27.398940)}
{pt3dadd(158784.000000,159984.000000,139875.000000,14.449470)}
{pt3dadd(158772.000000,160584.000000,139600.000000,14.449470)}
{pt3dadd(158832.000000,160884.000000,139450.000000,14.449470)}
{pt3dadd(158856.000000,161232.000000,139250.000000,23.733868)}
{pt3dadd(159036.000000,161568.000000,138875.000000,10.784398)}
{pt3dadd(158940.000000,162048.000000,137775.000000,10.784398)}
{pt3dadd(160224.000000,164388.000000,137525.000000,10.784398)}
{pt3dadd(160296.000000,164724.000000,137600.000000,18.471396)}
{pt3dadd(160476.000000,165144.000000,137500.000000,9.186998)}
{pt3dadd(160476.000000,165552.000000,137325.000000,9.186998)}
{pt3dadd(160548.000000,165840.000000,137325.000000,9.186998)}
{pt3dadd(160584.000000,166116.000000,137275.000000,18.471396)}
{pt3dadd(160800.000000,166452.000000,137175.000000,10.784398)}
{pt3dadd(161244.000000,166764.000000,137175.000000,10.784398)}
{pt3dadd(161184.000000,167136.000000,136925.000000,10.784398)}
{pt3dadd(161424.000000,167556.000000,136575.000000,21.985675)}
{pt3dadd(161292.000000,167952.000000,136675.000000,12.701277)}
{pt3dadd(161760.000000,168648.000000,136100.000000,12.701277)}
{pt3dadd(162228.000000,169212.000000,135425.000000,12.701277)}
{pt3dadd(162852.000000,169488.000000,134775.000000,20.388275)}
{pt3dadd(163200.000000,169740.000000,134350.000000,9.186998)}
{pt3dadd(163644.000000,170100.000000,134125.000000,9.186998)}
{pt3dadd(163956.000000,170580.000000,133850.000000,9.186998)}
{pt3dadd(164328.000000,170868.000000,133450.000000,20.388275)}
{pt3dadd(164688.000000,171336.000000,133100.000000,12.701277)}
{pt3dadd(165036.000000,171840.000000,132900.000000,12.701277)}
{pt3dadd(165432.000000,172380.000000,132775.000000,12.701277)}
{pt3dadd(165804.000000,173076.000000,132475.000000,23.902554)}
{pt3dadd(166224.000000,173808.000000,132425.000000,12.701277)}
{pt3dadd(166584.000000,174204.000000,132075.000000,12.701277)}
{pt3dadd(166980.000000,174672.000000,131950.000000,12.701277)}
{pt3dadd(167436.000000,175488.000000,131675.000000,23.902554)}
{pt3dadd(167784.000000,176028.000000,131500.000000,12.701277)}
{pt3dadd(168204.000000,176580.000000,131175.000000,12.701277)}
{pt3dadd(168576.000000,177048.000000,130925.000000,12.701277)}
{pt3dadd(168972.000000,177528.000000,130550.000000,21.985675)}
{pt3dadd(169284.000000,178008.000000,130275.000000,10.784398)}
{pt3dadd(169632.000000,178512.000000,129925.000000,10.784398)}
{pt3dadd(169992.000000,178860.000000,129825.000000,10.784398)}
{pt3dadd(170424.000000,179208.000000,129475.000000,18.471396)}
{pt3dadd(170832.000000,179580.000000,129425.000000,9.186998)}
{pt3dadd(171132.000000,179832.000000,129100.000000,9.186998)}
{pt3dadd(171468.000000,180348.000000,128750.000000,9.186998)}
{pt3dadd(171816.000000,180564.000000,128550.000000,15.542830)}
{pt3dadd(172128.000000,180888.000000,128375.000000,7.855832)}
{pt3dadd(172512.000000,181236.000000,128175.000000,7.855832)}
{pt3dadd(172848.000000,181308.000000,127975.000000,7.855832)}
{pt3dadd(173280.000000,181584.000000,127825.000000,15.542830)}
{pt3dadd(173700.000000,182196.000000,127575.000000,9.186998)}
{pt3dadd(174024.000000,182364.000000,127475.000000,9.186998)}
{pt3dadd(174396.000000,182760.000000,127375.000000,9.186998)}
{pt3dadd(174696.000000,183072.000000,127300.000000,16.873996)}
{pt3dadd(174948.000000,183408.000000,127100.000000,9.186998)}
{pt3dadd(175416.000000,183804.000000,126725.000000,9.186998)}
{pt3dadd(175884.000000,184200.000000,126450.000000,9.186998)}
{pt3dadd(175956.000000,184584.000000,126325.000000,15.542830)}
{pt3dadd(176352.000000,184884.000000,126000.000000,7.855832)}
{pt3dadd(176628.000000,185316.000000,125775.000000,7.855832)}
{pt3dadd(176808.000000,185568.000000,125675.000000,7.855832)}
{pt3dadd(177168.000000,185904.000000,125525.000000,15.542830)}
{pt3dadd(177564.000000,186168.000000,125475.000000,9.186998)}
{pt3dadd(177636.000000,186516.000000,125325.000000,9.186998)}
{pt3dadd(177852.000000,186828.000000,125175.000000,9.186998)}
{pt3dadd(178068.000000,187140.000000,125050.000000,15.542830)}
{pt3dadd(178248.000000,187416.000000,124950.000000,7.855832)}
{pt3dadd(178272.000000,187788.000000,124900.000000,7.855832)}
{pt3dadd(178632.000000,188100.000000,124600.000000,7.855832)}
{pt3dadd(178740.000000,188484.000000,124400.000000,17.140230)}
{pt3dadd(179172.000000,188832.000000,124225.000000,10.784398)}
{pt3dadd(179868.000000,189936.000000,123425.000000,10.784398)}
{pt3dadd(180264.000000,190512.000000,122825.000000,10.784398)}
{pt3dadd(181992.000000,191556.000000,121825.000000,21.985675)}
{pt3dadd(183216.000000,192408.000000,120925.000000,12.701277)}
{pt3dadd(184404.000000,193308.000000,120175.000000,12.701277)}
{pt3dadd(185364.000000,193920.000000,119425.000000,12.701277)}
{pt3dadd(186168.000000,194424.000000,118675.000000,23.442503)}
{pt3dadd(187380.000000,195192.000000,117750.000000,12.241226)}
{pt3dadd(188088.000000,195636.000000,117150.000000,12.241226)}
{pt3dadd(188772.000000,196404.000000,116100.000000,12.241226)}
{pt3dadd(189624.000000,197280.000000,115050.000000,23.442503)}
{pt3dadd(189972.000000,197508.000000,114625.000000,12.701277)}
{pt3dadd(190284.000000,197784.000000,114075.000000,12.701277)}
{pt3dadd(190656.000000,198336.000000,113450.000000,12.701277)}
{pt3dadd(190836.000000,198588.000000,112775.000000,21.985675)}
{pt3dadd(190824.000000,198984.000000,112450.000000,10.784398)}
{pt3dadd(190896.000000,199056.000000,112025.000000,10.784398)}
{pt3dadd(191064.000000,199116.000000,111475.000000,10.784398)}
{pt3dadd(190968.000000,199224.000000,110850.000000,16.030924)}
{pt3dadd(190848.000000,199296.000000,110150.000000,6.746526)}
{pt3dadd(191016.000000,199212.000000,109575.000000,6.746526)}
{pt3dadd(190860.000000,199320.000000,108925.000000,6.746526)}
{pt3dadd(190800.000000,201624.000000,107750.000000,16.030924)}
{pt3dadd(191700.000000,201612.000000,107175.000000,10.684398)}
{pt3dadd(191916.000000,202020.000000,106725.000000,10.684398)}
{pt3dadd(191724.000000,202188.000000,106025.000000,10.684398)}
{pt3dadd(192024.000000,202284.000000,105450.000000,21.885675)}
{pt3dadd(192048.000000,202476.000000,104750.000000,12.601277)}
{pt3dadd(192048.000000,202968.000000,104100.000000,12.701277)}
{pt3dadd(191976.000000,203244.000000,103500.000000,12.701277)}
{pt3dadd(191964.000000,203592.000000,102950.000000,26.202809)}
{pt3dadd(192360.000000,204360.000000,102275.000000,15.001532)}
{pt3dadd(192456.000000,204828.000000,101625.000000,15.001532)}
{pt3dadd(192540.000000,205176.000000,101075.000000,15.001532)}
{pt3dadd(192540.000000,205596.000000,100450.000000,29.354386)}
{pt3dadd(192552.000000,205980.000000,99850.000000,15.852854)}
{pt3dadd(192300.000000,206208.000000,99200.000000,15.852854)}
{pt3dadd(192048.000000,206568.000000,98525.000000,15.852854)}
{pt3dadd(192084.000000,206964.000000,97875.000000,29.354386)}
{pt3dadd(191796.000000,207300.000000,97150.000000,15.001532)}
{pt3dadd(191556.000000,207864.000000,96675.000000,26.423819)}
{pt3dadd(191316.000000,208428.000000,96075.000000,37.165044)}
{pt3dadd(191256.000000,208788.000000,95450.000000,38.439187)}
{pt3dadd(191196.000000,209016.000000,94700.000000,55.206127)}

{create adhoc2}
{access adhoc2}
{connect adhoc2(1), adhoc1(0)}
{nseg = 1}
{strdef color color = "White"}
{pt3dclear()}
{pt3dadd(191196.000000,209016.000000,94700.000000,55.206127)}
{pt3dadd(190056.000000,208872.000000,92725.000000,37.304083)}
{pt3dadd(189948.000000,209004.000000,91950.000000,22.982450)}
{pt3dadd(189588.000000,208800.000000,91300.000000,28.503063)}
{pt3dadd(189180.000000,208776.000000,90575.000000,17.761838)}
{pt3dadd(189156.000000,208572.000000,89975.000000,17.761838)}
{pt3dadd(189132.000000,208572.000000,89450.000000,17.761838)}
{pt3dadd(188736.000000,208464.000000,89000.000000,47.191132)}
{pt3dadd(188640.000000,208044.000000,88450.000000,55.949438)}
{pt3dadd(188688.000000,207948.000000,87875.000000,92.249063)}
{pt3dadd(188652.000000,207744.000000,87275.000000,126.600720)}

{create adhoc3}
{access adhoc3}
{connect adhoc3(1), adhoc2(0)}
{nseg = 1}
{strdef color color = "White"}
{pt3dclear()}
{pt3dadd(188652.000000,207744.000000,87275.000000,126.600720)}
{pt3dadd(189216.000000,203124.000000,85500.000000,58.674237)}
{pt3dadd(189180.000000,200796.000000,83575.000000,35.804542)}
{pt3dadd(189624.000000,199680.000000,83225.000000,21.083975)}
{pt3dadd(189972.000000,198768.000000,82675.000000,11.799577)}
{pt3dadd(189996.000000,197964.000000,82075.000000,11.799577)}
{pt3dadd(189888.000000,197316.000000,81325.000000,21.675172)}
{pt3dadd(190020.000000,197100.000000,80875.000000,32.876449)}
{pt3dadd(189792.000000,196560.000000,80350.000000,36.628120)}
{pt3dadd(189552.000000,196008.000000,79950.000000,57.506386)}

{create adhoc4}
{access adhoc4}
{connect adhoc4(1), adhoc3(0)}
{nseg = 1}
{strdef color color = "White"}
{pt3dclear()}
{pt3dadd(189552.000000,196008.000000,79950.000000,57.506386)}
{pt3dadd(189276.000000,196380.000000,77025.000000,26.088386)}
{pt3dadd(188628.000000,196380.000000,76275.000000,19.650716)}
{pt3dadd(188352.000000,196584.000000,75875.000000,12.771544)}
{pt3dadd(187836.000000,197112.000000,75425.000000,14.366316)}
{pt3dadd(187488.000000,197304.000000,75025.000000,23.110527)}

{create adhoc5}
{access adhoc5}
{connect adhoc5(1), adhoc4(0)}
{nseg = 1}
{strdef color color = "White"}
{pt3dclear()}
{pt3dadd(187488.000000,197304.000000,75025.000000,23.110527)}
{pt3dadd(186048.000000,197652.000000,74700.000000,12.661558)}
{pt3dadd(184992.000000,197952.000000,74925.000000,8.196935)}
{pt3dadd(184716.000000,197952.000000,75200.000000,5.803854)}
{pt3dadd(183864.000000,198108.000000,75200.000000,3.429025)}
{pt3dadd(182604.000000,198024.000000,75250.000000,3.429025)}
{pt3dadd(182352.000000,198192.000000,75800.000000,3.429025)}
{pt3dadd(181248.000000,199764.000000,76025.000000,5.358049)}
{pt3dadd(180672.000000,200652.000000,76025.000000,3.429025)}
{pt3dadd(180552.000000,200940.000000,76175.000000,3.429025)}
{pt3dadd(180600.000000,201336.000000,76675.000000,4.676958)}
{pt3dadd(180684.000000,201360.000000,77175.000000,5.862975)}
{pt3dadd(180648.000000,201588.000000,77525.000000,5.556584)}
{pt3dadd(180624.000000,201612.000000,77725.000000,7.430082)}

{create adhoc6}
{access adhoc6}
{connect adhoc6(1), adhoc4(0)}
{nseg = 1}
{strdef color color = "White"}
{pt3dclear()}
{pt3dadd(187488.000000,197304.000000,75025.000000,23.110527)}
{pt3dadd(188592.000000,197184.000000,74550.000000,17.447720)}
{pt3dadd(188724.000000,197328.000000,73950.000000,11.068632)}
{pt3dadd(188652.000000,197424.000000,73425.000000,11.068632)}
{pt3dadd(188628.000000,197664.000000,72950.000000,5.822105)}
{pt3dadd(188448.000000,197820.000000,72375.000000,5.822105)}
{pt3dadd(187644.000000,198168.000000,71775.000000,5.822105)}
{pt3dadd(186696.000000,198180.000000,71450.000000,10.144211)}
{pt3dadd(185916.000000,199248.000000,70875.000000,5.822105)}
{pt3dadd(185736.000000,199296.000000,70950.000000,5.822105)}
{pt3dadd(185436.000000,199380.000000,70850.000000,5.822105)}
{pt3dadd(185184.000000,199356.000000,70775.000000,9.959327)}
{pt3dadd(184980.000000,199404.000000,70625.000000,5.637221)}
{pt3dadd(184764.000000,199404.000000,70600.000000,5.637221)}
{pt3dadd(184476.000000,199488.000000,70550.000000,5.637221)}
{pt3dadd(184128.000000,199644.000000,70400.000000,9.959327)}
{pt3dadd(183924.000000,199776.000000,70500.000000,5.822105)}
{pt3dadd(183144.000000,200652.000000,70525.000000,5.822105)}
{pt3dadd(182268.000000,201156.000000,70525.000000,5.822105)}
{pt3dadd(182124.000000,201168.000000,70150.000000,9.959327)}
{pt3dadd(181824.000000,201252.000000,70050.000000,5.637221)}
{pt3dadd(181488.000000,201420.000000,69900.000000,5.637221)}
{pt3dadd(181248.000000,201504.000000,69875.000000,5.637221)}
{pt3dadd(180960.000000,201708.000000,69775.000000,8.012051)}
{pt3dadd(180588.000000,201732.000000,69450.000000,3.874829)}
{pt3dadd(180348.000000,201696.000000,69125.000000,3.874829)}
{pt3dadd(180048.000000,201672.000000,68850.000000,3.874829)}
{pt3dadd(179808.000000,201648.000000,68775.000000,6.656233)}
{pt3dadd(179568.000000,201696.000000,68700.000000,4.281404)}
{pt3dadd(179328.000000,201900.000000,68550.000000,4.281404)}
{pt3dadd(179064.000000,201792.000000,68300.000000,4.281404)}
{pt3dadd(178752.000000,201936.000000,68050.000000,7.191199)}
{pt3dadd(178452.000000,202032.000000,67800.000000,4.409795)}
{pt3dadd(178188.000000,202164.000000,67500.000000,4.409795)}
{pt3dadd(177840.000000,202092.000000,67000.000000,4.409795)}
{pt3dadd(177444.000000,201960.000000,66550.000000,7.319591)}
{pt3dadd(177192.000000,201900.000000,66200.000000,4.409795)}
{pt3dadd(176652.000000,202260.000000,65800.000000,4.409795)}
{pt3dadd(176256.000000,202284.000000,65200.000000,4.409795)}
{pt3dadd(176220.000000,202104.000000,64625.000000,7.961550)}
{pt3dadd(176016.000000,201996.000000,64150.000000,5.051754)}
{pt3dadd(175992.000000,201816.000000,63625.000000,5.051754)}
{pt3dadd(175848.000000,201672.000000,63100.000000,5.051754)}
{pt3dadd(175440.000000,201612.000000,62600.000000,7.426584)}
{pt3dadd(174792.000000,201840.000000,62025.000000,5.803854)}
{pt3dadd(174516.000000,201804.000000,61800.000000,6.250350)}
{pt3dadd(174276.000000,202152.000000,61900.000000,9.417250)}
{pt3dadd(173472.000000,201672.000000,62375.000000,3.732480)}

{create adhoc7}
{access adhoc7}
{connect adhoc7(1), adhoc3(0)}
{nseg = 1}
{strdef color color = "White"}
{pt3dclear()}
{pt3dadd(189552.000000,196008.000000,79950.000000,57.506386)}
{pt3dadd(189648.000000,195156.000000,79375.000000,38.837591)}
{pt3dadd(189960.000000,194136.000000,78850.000000,23.902554)}
{pt3dadd(189960.000000,193896.000000,78350.000000,21.985675)}
{pt3dadd(190116.000000,193560.000000,78250.000000,10.784398)}
{pt3dadd(190164.000000,193224.000000,78075.000000,10.784398)}
{pt3dadd(190404.000000,192936.000000,77875.000000,10.784398)}
{pt3dadd(190536.000000,192576.000000,77725.000000,21.985675)}
{pt3dadd(190620.000000,192192.000000,77650.000000,12.701277)}
{pt3dadd(190812.000000,191880.000000,77500.000000,23.902554)}
{pt3dadd(190860.000000,191304.000000,77300.000000,35.103832)}
{pt3dadd(190920.000000,190944.000000,77025.000000,38.837591)}
{pt3dadd(190824.000000,190836.000000,77050.000000,57.506386)}

{create adhoc8}
{access adhoc8}
{connect adhoc8(1), adhoc7(0)}
{nseg = 1}
{strdef color color = "White"}
{pt3dclear()}
{pt3dadd(190824.000000,190836.000000,77050.000000,57.506386)}
{pt3dadd(189348.000000,190620.000000,78150.000000,22.248685)}
{pt3dadd(189168.000000,190512.000000,78450.000000,15.197145)}
{pt3dadd(189228.000000,190224.000000,78950.000000,5.243801)}
{pt3dadd(189636.000000,189816.000000,79425.000000,5.659779)}
{pt3dadd(189732.000000,189684.000000,79650.000000,7.739669)}

{create adhoc9}
{access adhoc9}
{connect adhoc9(1), adhoc7(0)}
{nseg = 1}
{strdef color color = "White"}
{pt3dclear()}
{pt3dadd(190824.000000,190836.000000,77050.000000,57.506386)}
{pt3dadd(190980.000000,190572.000000,76925.000000,38.837591)}
{pt3dadd(191112.000000,190332.000000,76775.000000,23.902554)}
{pt3dadd(191244.000000,189972.000000,76475.000000,23.902554)}
{pt3dadd(191556.000000,189660.000000,76475.000000,12.701277)}
{pt3dadd(191784.000000,189336.000000,76350.000000,12.701277)}
{pt3dadd(191940.000000,189012.000000,76400.000000,23.902554)}
{pt3dadd(192000.000000,188844.000000,76325.000000,37.404086)}
{pt3dadd(192156.000000,188520.000000,75900.000000,42.671349)}
{pt3dadd(192216.000000,188148.000000,75650.000000,69.007660)}

{create adhoc10}
{access adhoc10}
{connect adhoc10(1), adhoc9(0)}
{nseg = 1}
{strdef color color = "White"}
{pt3dclear()}
{pt3dadd(192216.000000,188148.000000,75650.000000,69.007660)}
{pt3dadd(190944.000000,188616.000000,77600.000000,27.217594)}
{pt3dadd(189756.000000,188616.000000,77350.000000,16.930557)}
{pt3dadd(188472.000000,188460.000000,76725.000000,4.418969)}
{pt3dadd(188268.000000,188424.000000,76650.000000,3.264899)}
{pt3dadd(188076.000000,188244.000000,76350.000000,4.039853)}
{pt3dadd(187824.000000,188136.000000,76175.000000,5.733088)}
{pt3dadd(187752.000000,188064.000000,75750.000000,5.374770)}

{create adhoc11}
{access adhoc11}
{connect adhoc11(1), adhoc9(0)}
{nseg = 1}
{strdef color color = "White"}
{pt3dclear()}
{pt3dadd(192216.000000,188148.000000,75650.000000,69.007660)}
{pt3dadd(192348.000000,187788.000000,74900.000000,46.505107)}
{pt3dadd(192144.000000,187356.000000,74450.000000,28.503064)}
{pt3dadd(191976.000000,187056.000000,73725.000000,26.202809)}
{pt3dadd(193164.000000,185616.000000,73275.000000,23.902554)}
{pt3dadd(193560.000000,184224.000000,72700.000000,38.837591)}
{pt3dadd(193788.000000,183924.000000,72000.000000,57.506386)}

{create adhoc12}
{access adhoc12}
{connect adhoc12(1), adhoc11(0)}
{nseg = 1}
{strdef color color = "White"}
{pt3dclear()}
{pt3dadd(193788.000000,183924.000000,72000.000000,57.506386)}
{pt3dadd(193032.000000,179820.000000,72075.000000,35.642792)}
{pt3dadd(193548.000000,179340.000000,72950.000000,21.985675)}
{pt3dadd(193608.000000,179028.000000,73150.000000,21.985675)}
{pt3dadd(193740.000000,178692.000000,73325.000000,12.701277)}
{pt3dadd(193848.000000,178296.000000,73375.000000,12.701277)}
{pt3dadd(193944.000000,177876.000000,73650.000000,12.701277)}
{pt3dadd(193968.000000,177480.000000,73825.000000,21.985675)}
{pt3dadd(194172.000000,177132.000000,73975.000000,20.068796)}
{pt3dadd(194304.000000,176760.000000,74025.000000,32.447993)}
{pt3dadd(194424.000000,176616.000000,74275.000000,47.921990)}

{create adhoc13}
{access adhoc13}
{connect adhoc13(1), adhoc12(0)}
{nseg = 1}
{strdef color color = "White"}
{pt3dclear()}
{pt3dadd(194424.000000,176616.000000,74275.000000,47.921990)}
{pt3dadd(195108.000000,176676.000000,75750.000000,19.053886)}
{pt3dadd(195564.000000,176880.000000,76375.000000,17.188565)}
{pt3dadd(195576.000000,177048.000000,76850.000000,10.093722)}
{pt3dadd(195432.000000,177252.000000,77250.000000,13.374147)}

{create adhoc14}
{access adhoc14}
{connect adhoc14(1), adhoc13(0)}
{nseg = 1}
{strdef color color = "White"}
{pt3dclear()}
{pt3dadd(195432.000000,177252.000000,77250.000000,13.374147)}
{pt3dadd(194400.000000,177372.000000,77425.000000,7.107957)}
{pt3dadd(194208.000000,177420.000000,77500.000000,5.252745)}
{pt3dadd(193944.000000,177480.000000,77500.000000,3.175112)}
{pt3dadd(193728.000000,177408.000000,77525.000000,2.641946)}
{pt3dadd(193428.000000,177132.000000,77875.000000,2.985984)}

{create adhoc15}
{access adhoc15}
{connect adhoc15(1), adhoc13(0)}
{nseg = 1}
{strdef color color = "White"}
{pt3dclear()}
{pt3dadd(195432.000000,177252.000000,77250.000000,13.374147)}
{pt3dadd(195528.000000,177564.000000,77750.000000,10.307708)}
{pt3dadd(195324.000000,177756.000000,78200.000000,16.692211)}
{pt3dadd(195300.000000,177876.000000,78625.000000,18.012644)}
{pt3dadd(195432.000000,178008.000000,79025.000000,33.279160)}

{create adhoc16}
{access adhoc16}
{connect adhoc16(1), adhoc15(0)}
{nseg = 1}
{strdef color color = "White"}
{pt3dclear()}
{pt3dadd(195432.000000,178008.000000,79025.000000,33.279160)}
{pt3dadd(195372.000000,177192.000000,79250.000000,15.308094)}
{pt3dadd(195468.000000,176868.000000,79600.000000,11.713881)}
{pt3dadd(195408.000000,175992.000000,80300.000000,6.133003)}
{pt3dadd(195540.000000,175812.000000,80725.000000,6.006631)}
{pt3dadd(195540.000000,175644.000000,81175.000000,5.374770)}

{create adhoc17}
{access adhoc17}
{connect adhoc17(1), adhoc15(0)}
{nseg = 1}
{strdef color color = "White"}
{pt3dclear()}
{pt3dadd(195432.000000,178008.000000,79025.000000,33.279160)}
{pt3dadd(195108.000000,178572.000000,79350.000000,15.308094)}
{pt3dadd(194904.000000,178884.000000,79750.000000,9.784857)}
{pt3dadd(194592.000000,179568.000000,80375.000000,5.358049)}
{pt3dadd(194424.000000,180024.000000,80800.000000,4.418969)}
{pt3dadd(194076.000000,180384.000000,81275.000000,5.014764)}
{pt3dadd(194280.000000,180468.000000,81475.000000,7.357941)}
{pt3dadd(194328.000000,180552.000000,81650.000000,4.478975)}

{create adhoc18}
{access adhoc18}
{connect adhoc18(1), adhoc12(0)}
{nseg = 1}
{strdef color color = "White"}
{pt3dclear()}
{pt3dadd(194424.000000,176616.000000,74275.000000,47.921990)}
{pt3dadd(194592.000000,176208.000000,74300.000000,32.447993)}
{pt3dadd(194796.000000,175968.000000,74425.000000,20.068796)}
{pt3dadd(194820.000000,175524.000000,74150.000000,19.317378)}
{pt3dadd(194760.000000,174984.000000,74075.000000,21.234257)}
{pt3dadd(194724.000000,174420.000000,74075.000000,34.390429)}
{pt3dadd(194820.000000,174312.000000,74275.000000,57.506386)}

{create adhoc19}
{access adhoc19}
{connect adhoc19(1), adhoc18(0)}
{nseg = 1}
{strdef color color = "White"}
{pt3dclear()}
{pt3dadd(194820.000000,174312.000000,74275.000000,57.506386)}
{pt3dadd(193560.000000,174252.000000,73850.000000,28.084893)}
{pt3dadd(193536.000000,174096.000000,73775.000000,13.374147)}
{pt3dadd(193476.000000,173856.000000,73800.000000,13.374147)}

{create adhoc20}
{access adhoc20}
{connect adhoc20(1), adhoc18(0)}
{nseg = 1}
{strdef color color = "White"}
{pt3dclear()}
{pt3dadd(194820.000000,174312.000000,74275.000000,57.506386)}
{pt3dadd(195216.000000,174012.000000,74350.000000,58.145345)}
{pt3dadd(195348.000000,173640.000000,74475.000000,47.921990)}

{create adhoc21}
{access adhoc21}
{connect adhoc21(1), adhoc20(0)}
{nseg = 1}
{strdef color color = "White"}
{pt3dclear()}
{pt3dadd(195348.000000,173640.000000,74475.000000,47.921990)}
{pt3dadd(195348.000000,173052.000000,72075.000000,28.813178)}
{pt3dadd(194988.000000,172872.000000,71850.000000,19.258772)}
{pt3dadd(194700.000000,172560.000000,71275.000000,19.258772)}

{create adhoc22}
{access adhoc22}
{connect adhoc22(1), adhoc21(0)}
{nseg = 1}
{strdef color color = "White"}
{pt3dclear()}
{pt3dadd(194700.000000,172560.000000,71275.000000,19.258772)}
{pt3dadd(193548.000000,171168.000000,71175.000000,9.069499)}
{pt3dadd(193524.000000,171024.000000,71325.000000,6.041699)}
{pt3dadd(193416.000000,170772.000000,71250.000000,3.479890)}
{pt3dadd(193212.000000,170508.000000,71325.000000,2.489945)}
{pt3dadd(192960.000000,170256.000000,71525.000000,2.489945)}
{pt3dadd(192828.000000,169956.000000,71500.000000,2.489945)}
{pt3dadd(192216.000000,169080.000000,71575.000000,4.418969)}
{pt3dadd(192156.000000,168852.000000,71475.000000,3.429025)}
{pt3dadd(192084.000000,168648.000000,71475.000000,4.986545)}
{pt3dadd(192096.000000,168372.000000,71450.000000,6.234479)}
{pt3dadd(192192.000000,168096.000000,71450.000000,6.175757)}
{pt3dadd(192204.000000,167868.000000,71375.000000,7.739669)}

{create adhoc23}
{access adhoc23}
{connect adhoc23(1), adhoc21(0)}
{nseg = 1}
{strdef color color = "White"}
{pt3dclear()}
{pt3dadd(194700.000000,172560.000000,71275.000000,19.258772)}
{pt3dadd(194232.000000,172416.000000,70875.000000,16.163801)}
{pt3dadd(194064.000000,172500.000000,70175.000000,14.620386)}
{pt3dadd(193692.000000,172476.000000,69675.000000,13.850035)}
{pt3dadd(193488.000000,172584.000000,69100.000000,13.339182)}
{pt3dadd(192780.000000,172452.000000,68425.000000,15.407018)}

{create adhoc24}
{access adhoc24}
{connect adhoc24(1), adhoc23(0)}
{nseg = 1}
{strdef color color = "White"}
{pt3dclear()}
{pt3dadd(192780.000000,172452.000000,68425.000000,15.407018)}
{pt3dadd(191892.000000,172812.000000,68275.000000,7.427263)}
{pt3dadd(191736.000000,172920.000000,68225.000000,5.056358)}
{pt3dadd(191532.000000,173112.000000,67925.000000,4.649783)}
{pt3dadd(191292.000000,173232.000000,67675.000000,3.874829)}
{pt3dadd(191100.000000,173232.000000,67575.000000,3.874829)}
{pt3dadd(190896.000000,173328.000000,67450.000000,4.864774)}
{pt3dadd(190716.000000,173412.000000,67575.000000,5.854719)}
{pt3dadd(190488.000000,174324.000000,66975.000000,4.799816)}
{pt3dadd(190548.000000,174528.000000,66925.000000,6.449724)}

{create adhoc25}
{access adhoc25}
{connect adhoc25(1), adhoc23(0)}
{nseg = 1}
{strdef color color = "White"}
{pt3dclear()}
{pt3dadd(192780.000000,172452.000000,68425.000000,15.407018)}
{pt3dadd(192840.000000,172080.000000,68075.000000,12.055263)}
{pt3dadd(192516.000000,171708.000000,67625.000000,7.833158)}
{pt3dadd(192240.000000,171120.000000,67275.000000,8.603509)}
{pt3dadd(191880.000000,170688.000000,66850.000000,5.051754)}
{pt3dadd(191340.000000,169872.000000,66400.000000,5.051754)}
{pt3dadd(191136.000000,169188.000000,66150.000000,5.051754)}
{pt3dadd(190416.000000,168900.000000,65675.000000,9.373860)}
{pt3dadd(190308.000000,168648.000000,65500.000000,9.373860)}
{pt3dadd(190200.000000,168444.000000,65400.000000,14.623100)}
{pt3dadd(190224.000000,168228.000000,65525.000000,19.258772)}

{create adhoc26}
{access adhoc26}
{connect adhoc26(1), adhoc25(0)}
{nseg = 1}
{strdef color color = "White"}
{pt3dclear()}
{pt3dadd(190224.000000,168228.000000,65525.000000,19.258772)}
{pt3dadd(189384.000000,168276.000000,64375.000000,9.499480)}
{pt3dadd(189156.000000,168360.000000,64275.000000,7.677604)}
{pt3dadd(188928.000000,168420.000000,64125.000000,3.796526)}
{pt3dadd(188760.000000,168384.000000,64100.000000,3.439853)}

{create adhoc27}
{access adhoc27}
{connect adhoc27(1), adhoc25(0)}
{nseg = 1}
{strdef color color = "White"}
{pt3dclear()}
{pt3dadd(190224.000000,168228.000000,65525.000000,19.258772)}
{pt3dadd(190344.000000,168012.000000,65575.000000,12.055263)}
{pt3dadd(190320.000000,167796.000000,65525.000000,7.833158)}
{pt3dadd(190332.000000,167556.000000,65550.000000,6.656233)}
{pt3dadd(190236.000000,167304.000000,65400.000000,3.874829)}
{pt3dadd(190212.000000,167064.000000,65500.000000,3.874829)}
{pt3dadd(190176.000000,166812.000000,65350.000000,3.874829)}
{pt3dadd(190176.000000,166572.000000,65350.000000,6.784625)}
{pt3dadd(190140.000000,165060.000000,65350.000000,4.409795)}
{pt3dadd(190104.000000,164004.000000,65350.000000,4.409795)}
{pt3dadd(190284.000000,163812.000000,65650.000000,4.409795)}
{pt3dadd(190104.000000,163656.000000,65600.000000,7.319591)}
{pt3dadd(189672.000000,162672.000000,65600.000000,4.409795)}
{pt3dadd(189624.000000,162408.000000,65225.000000,4.409795)}
{pt3dadd(189564.000000,162192.000000,65150.000000,4.409795)}
{pt3dadd(189624.000000,161928.000000,65050.000000,6.338820)}
{pt3dadd(189624.000000,161664.000000,64900.000000,3.429025)}
{pt3dadd(189600.000000,161376.000000,64500.000000,3.429025)}
{pt3dadd(189468.000000,161136.000000,64425.000000,3.429025)}
{pt3dadd(189336.000000,160920.000000,64125.000000,4.203979)}
{pt3dadd(189060.000000,160632.000000,63925.000000,2.597034)}
{pt3dadd(188688.000000,160356.000000,63475.000000,3.328390)}
{pt3dadd(188592.000000,160200.000000,63575.000000,3.110400)}

{create adhoc28}
{access adhoc28}
{connect adhoc28(1), adhoc20(0)}
{nseg = 1}
{strdef color color = "White"}
{pt3dclear()}
{pt3dadd(195348.000000,173640.000000,74475.000000,47.921990)}
{pt3dadd(196020.000000,173304.000000,75175.000000,29.785660)}
{pt3dadd(196380.000000,172920.000000,75325.000000,18.471396)}
{pt3dadd(196680.000000,172464.000000,75525.000000,18.471396)}
{pt3dadd(196872.000000,172116.000000,75700.000000,10.784398)}
{pt3dadd(197064.000000,171720.000000,75900.000000,20.068796)}
{pt3dadd(197220.000000,171348.000000,76025.000000,27.755794)}
{pt3dadd(196932.000000,171036.000000,76075.000000,29.785660)}
{pt3dadd(196836.000000,170664.000000,76275.000000,39.934990)}

{create adhoc29}
{access adhoc29}
{connect adhoc29(1), adhoc28(0)}
{nseg = 1}
{strdef color color = "White"}
{pt3dclear()}
{pt3dadd(196836.000000,170664.000000,76275.000000,39.934990)}
{pt3dadd(197148.000000,170412.000000,76275.000000,27.123327)}
{pt3dadd(197316.000000,170124.000000,76350.000000,16.873996)}
{pt3dadd(197592.000000,169836.000000,76450.000000,18.471396)}
{pt3dadd(197652.000000,169548.000000,76475.000000,10.784398)}
{pt3dadd(197784.000000,169188.000000,76525.000000,10.784398)}
{pt3dadd(197988.000000,168756.000000,76725.000000,18.471396)}
{pt3dadd(198384.000000,168360.000000,76800.000000,26.158394)}
{pt3dadd(198516.000000,167976.000000,76825.000000,27.123327)}
{pt3dadd(198648.000000,167556.000000,76900.000000,39.934990)}

{create adhoc30}
{access adhoc30}
{connect adhoc30(1), adhoc29(0)}
{nseg = 1}
{strdef color color = "White"}
{pt3dclear()}
{pt3dadd(198648.000000,167556.000000,76900.000000,39.934990)}
{pt3dadd(198984.000000,167268.000000,76975.000000,27.123327)}
{pt3dadd(198912.000000,166944.000000,76950.000000,16.873996)}
{pt3dadd(198924.000000,166584.000000,77025.000000,18.471396)}
{pt3dadd(198936.000000,166188.000000,77050.000000,20.068796)}
{pt3dadd(198960.000000,165852.000000,77025.000000,28.969818)}
{pt3dadd(198984.000000,165600.000000,77000.000000,47.283029)}
{pt3dadd(198948.000000,165408.000000,76925.000000,46.005108)}

{create adhoc31}
{access adhoc31}
{connect adhoc31(1), adhoc30(0)}
{nseg = 1}
{strdef color color = "White"}
{pt3dclear()}
{pt3dadd(198948.000000,165408.000000,76925.000000,46.005108)}
{pt3dadd(199116.000000,165072.000000,76975.000000,31.809033)}
{pt3dadd(199164.000000,164628.000000,77050.000000,19.685420)}
{pt3dadd(199104.000000,164244.000000,77150.000000,20.068796)}
{pt3dadd(199044.000000,163944.000000,77100.000000,20.068796)}
{pt3dadd(198984.000000,163536.000000,77025.000000,32.447993)}
{pt3dadd(198744.000000,163200.000000,76950.000000,47.921990)}

{create adhoc32}
{access adhoc32}
{connect adhoc32(1), adhoc31(0)}
{nseg = 1}
{strdef color color = "White"}
{pt3dclear()}
{pt3dadd(198744.000000,163200.000000,76950.000000,47.921990)}
{pt3dadd(198972.000000,162924.000000,77200.000000,32.447993)}
{pt3dadd(199068.000000,162636.000000,77325.000000,20.068796)}
{pt3dadd(199068.000000,162372.000000,77500.000000,18.471396)}
{pt3dadd(198900.000000,162000.000000,77550.000000,9.186998)}
{pt3dadd(198756.000000,161628.000000,77550.000000,9.186998)}
{pt3dadd(198780.000000,161220.000000,77475.000000,9.186998)}
{pt3dadd(198684.000000,160884.000000,77625.000000,15.542830)}
{pt3dadd(198648.000000,160596.000000,77700.000000,13.945430)}
{pt3dadd(198624.000000,160320.000000,77625.000000,22.242384)}
{pt3dadd(198708.000000,160032.000000,77750.000000,31.947992)}

{create adhoc33}
{access adhoc33}
{connect adhoc33(1), adhoc32(0)}
{nseg = 1}
{strdef color color = "White"}
{pt3dclear()}
{pt3dadd(198708.000000,160032.000000,77750.000000,31.947992)}
{pt3dadd(198792.000000,159672.000000,77600.000000,22.242384)}
{pt3dadd(199056.000000,159396.000000,77575.000000,13.945430)}
{pt3dadd(199188.000000,159024.000000,77725.000000,15.542830)}
{pt3dadd(199128.000000,158724.000000,77700.000000,9.186998)}
{pt3dadd(199152.000000,158400.000000,77700.000000,9.186998)}
{pt3dadd(199164.000000,158028.000000,77700.000000,18.471396)}
{pt3dadd(199068.000000,157680.000000,77825.000000,27.755794)}
{pt3dadd(199092.000000,157332.000000,77875.000000,32.447993)}
{pt3dadd(199020.000000,156924.000000,77775.000000,47.921990)}

{create adhoc34}
{access adhoc34}
{connect adhoc34(1), adhoc33(0)}
{nseg = 1}
{strdef color color = "White"}
{pt3dclear()}
{pt3dadd(199020.000000,156924.000000,77775.000000,47.921990)}
{pt3dadd(199044.000000,156528.000000,77875.000000,29.785660)}
{pt3dadd(199308.000000,156204.000000,77950.000000,18.471396)}
{pt3dadd(199464.000000,155856.000000,78050.000000,16.873996)}
{pt3dadd(199440.000000,155532.000000,78025.000000,9.186998)}
{pt3dadd(199464.000000,155244.000000,78050.000000,9.186998)}
{pt3dadd(199524.000000,154836.000000,78050.000000,9.186998)}
{pt3dadd(199536.000000,154596.000000,78050.000000,16.873996)}
{pt3dadd(199500.000000,154320.000000,77975.000000,9.186998)}
{pt3dadd(199404.000000,154032.000000,77875.000000,9.186998)}
{pt3dadd(199260.000000,153648.000000,77850.000000,9.186998)}
{pt3dadd(199188.000000,153216.000000,77950.000000,15.542830)}
{pt3dadd(199128.000000,152856.000000,78025.000000,7.855832)}
{pt3dadd(198984.000000,152484.000000,77950.000000,7.855832)}
{pt3dadd(198840.000000,152148.000000,77900.000000,7.855832)}
{pt3dadd(198852.000000,151812.000000,77925.000000,14.211664)}
{pt3dadd(198720.000000,151452.000000,77850.000000,7.855832)}
{pt3dadd(198648.000000,151140.000000,77775.000000,7.855832)}
{pt3dadd(198624.000000,150852.000000,77700.000000,7.855832)}
{pt3dadd(198528.000000,150540.000000,77550.000000,14.916649)}
{pt3dadd(198528.000000,150216.000000,77450.000000,17.263532)}
{pt3dadd(198612.000000,149844.000000,77375.000000,27.772553)}
{pt3dadd(198552.000000,149076.000000,77225.000000,45.013573)}

{create adhoc35}
{access adhoc35}
{connect adhoc35(1), adhoc34(0)}
{nseg = 1}
{strdef color color = "White"}
{pt3dclear()}
{pt3dadd(198552.000000,149076.000000,77225.000000,45.013573)}
{pt3dadd(198468.000000,148620.000000,77075.000000,26.597578)}
{pt3dadd(198516.000000,148320.000000,77425.000000,16.558547)}
{pt3dadd(198720.000000,148032.000000,77600.000000,11.993053)}
{pt3dadd(198852.000000,147600.000000,77800.000000,5.637221)}
{pt3dadd(198864.000000,147432.000000,77775.000000,9.959327)}
{pt3dadd(198840.000000,147180.000000,77825.000000,14.771005)}
{pt3dadd(198972.000000,146832.000000,77950.000000,16.722973)}
{pt3dadd(198984.000000,146616.000000,78100.000000,25.558392)}

{create adhoc36}
{access adhoc36}
{connect adhoc36(1), adhoc35(0)}
{nseg = 1}
{strdef color color = "White"}
{pt3dclear()}
{pt3dadd(198984.000000,146616.000000,78100.000000,25.558392)}
{pt3dadd(199104.000000,146280.000000,78050.000000,16.722973)}
{pt3dadd(199128.000000,146040.000000,77950.000000,10.633784)}
{pt3dadd(199068.000000,145692.000000,77950.000000,11.068632)}
{pt3dadd(199152.000000,145284.000000,77850.000000,6.746526)}
{pt3dadd(199236.000000,144936.000000,77750.000000,6.746526)}
{pt3dadd(199284.000000,144516.000000,77750.000000,6.746526)}
{pt3dadd(199308.000000,144192.000000,77650.000000,14.114046)}
{pt3dadd(199164.000000,143892.000000,77750.000000,8.867519)}
{pt3dadd(199248.000000,143496.000000,77975.000000,8.867519)}
{pt3dadd(199176.000000,143172.000000,77975.000000,8.867519)}
{pt3dadd(199080.000000,142800.000000,78050.000000,16.235038)}
{pt3dadd(199044.000000,142416.000000,78100.000000,16.554517)}
{pt3dadd(199008.000000,142152.000000,78275.000000,24.241515)}
{pt3dadd(198972.000000,141756.000000,78450.000000,39.402524)}
{pt3dadd(198984.000000,141540.000000,78375.000000,39.934990)}

{create adhoc37}
{access adhoc37}
{connect adhoc37(1), adhoc36(0)}
{nseg = 1}
{strdef color color = "White"}
{pt3dclear()}
{pt3dadd(198984.000000,141540.000000,78375.000000,39.934990)}
{pt3dadd(198816.000000,141228.000000,78350.000000,26.590861)}
{pt3dadd(198636.000000,140856.000000,78225.000000,16.554517)}
{pt3dadd(198576.000000,140496.000000,78225.000000,14.114045)}
{pt3dadd(198540.000000,140160.000000,78250.000000,6.746526)}
{pt3dadd(198600.000000,139908.000000,78250.000000,6.746526)}
{pt3dadd(198624.000000,139632.000000,78250.000000,6.746526)}
{pt3dadd(198528.000000,139296.000000,78175.000000,12.580541)}
{pt3dadd(198384.000000,138960.000000,78150.000000,12.145693)}
{pt3dadd(198360.000000,138684.000000,78100.000000,19.242822)}
{pt3dadd(198324.000000,138360.000000,78025.000000,25.558393)}

{create adhoc38}
{access adhoc38}
{connect adhoc38(1), adhoc37(0)}
{nseg = 1}
{strdef color color = "White"}
{pt3dclear()}
{pt3dadd(198324.000000,138360.000000,78025.000000,25.558393)}
{pt3dadd(198216.000000,138120.000000,77950.000000,16.722973)}
{pt3dadd(198180.000000,137784.000000,78050.000000,10.633784)}
{pt3dadd(198144.000000,137460.000000,77925.000000,10.233028)}
{pt3dadd(198012.000000,137028.000000,77875.000000,5.910923)}
{pt3dadd(197976.000000,136812.000000,77850.000000,5.910923)}
{pt3dadd(197832.000000,136464.000000,77700.000000,5.910923)}
{pt3dadd(197700.000000,136116.000000,77625.000000,10.233028)}
{pt3dadd(197628.000000,135768.000000,77625.000000,5.822105)}
{pt3dadd(197532.000000,135456.000000,77575.000000,5.822105)}
{pt3dadd(197328.000000,135108.000000,77500.000000,5.822105)}
{pt3dadd(197256.000000,134760.000000,77500.000000,10.144211)}
{pt3dadd(197088.000000,134412.000000,77425.000000,5.822105)}
{pt3dadd(196956.000000,134124.000000,77325.000000,5.822105)}
{pt3dadd(196860.000000,133704.000000,77200.000000,5.822105)}
{pt3dadd(196764.000000,133392.000000,77175.000000,9.447875)}
{pt3dadd(196620.000000,133128.000000,77050.000000,5.125770)}
{pt3dadd(196368.000000,132804.000000,77050.000000,5.125770)}
{pt3dadd(196200.000000,132504.000000,76900.000000,5.125770)}
{pt3dadd(196020.000000,132048.000000,76600.000000,10.372296)}
{pt3dadd(195816.000000,131820.000000,76450.000000,11.993053)}
{pt3dadd(195708.000000,131532.000000,76350.000000,18.988421)}
{pt3dadd(195732.000000,131388.000000,76900.000000,27.732632)}

{create adhoc39}
{access adhoc39}
{connect adhoc39(1), adhoc38(0)}
{nseg = 1}
{strdef color color = "White"}
{pt3dclear()}
{pt3dadd(195732.000000,131388.000000,76900.000000,27.732632)}
{pt3dadd(195744.000000,131112.000000,77225.000000,16.163801)}
{pt3dadd(195636.000000,130824.000000,77225.000000,10.298281)}
{pt3dadd(195600.000000,130560.000000,77350.000000,8.603509)}
{pt3dadd(195612.000000,130308.000000,77350.000000,5.051754)}
{pt3dadd(195588.000000,129996.000000,77375.000000,5.051754)}
{pt3dadd(195528.000000,129720.000000,77425.000000,5.051754)}
{pt3dadd(195468.000000,129396.000000,77475.000000,8.841098)}
{pt3dadd(195408.000000,129108.000000,77500.000000,5.289343)}
{pt3dadd(195372.000000,128748.000000,77500.000000,5.289343)}
{pt3dadd(195372.000000,128472.000000,77475.000000,5.289343)}
{pt3dadd(195312.000000,128124.000000,77525.000000,9.426565)}
{pt3dadd(195240.000000,127800.000000,77625.000000,5.637222)}
{pt3dadd(195180.000000,127560.000000,77600.000000,5.637222)}
{pt3dadd(195072.000000,127260.000000,77625.000000,5.637222)}
{pt3dadd(194964.000000,126960.000000,77650.000000,11.471236)}
{pt3dadd(194892.000000,126612.000000,77750.000000,7.334014)}
{pt3dadd(194916.000000,126324.000000,77875.000000,7.334014)}
{pt3dadd(194880.000000,126072.000000,78000.000000,7.334014)}
{pt3dadd(194772.000000,125736.000000,78025.000000,12.580540)}
{pt3dadd(194712.000000,125424.000000,78100.000000,6.746526)}
{pt3dadd(194652.000000,125076.000000,78150.000000,6.746526)}
{pt3dadd(194592.000000,124740.000000,78200.000000,6.746526)}
{pt3dadd(194592.000000,124356.000000,78350.000000,10.298281)}
{pt3dadd(194556.000000,123972.000000,78375.000000,5.051754)}
{pt3dadd(194556.000000,123636.000000,78300.000000,5.051754)}
{pt3dadd(194604.000000,123384.000000,78200.000000,5.051754)}
{pt3dadd(194604.000000,123108.000000,78125.000000,8.449439)}
{pt3dadd(194568.000000,122820.000000,78125.000000,4.897684)}
{pt3dadd(194568.000000,122520.000000,78150.000000,4.897684)}
{pt3dadd(194532.000000,122292.000000,78125.000000,4.897684)}
{pt3dadd(194508.000000,121968.000000,78150.000000,8.449439)}
{pt3dadd(194508.000000,121716.000000,78150.000000,5.051754)}
{pt3dadd(194448.000000,121416.000000,78175.000000,5.051754)}
{pt3dadd(194544.000000,121140.000000,78150.000000,5.051754)}
{pt3dadd(194484.000000,120804.000000,78200.000000,7.961550)}
{pt3dadd(194532.000000,120456.000000,78325.000000,7.961550)}
{pt3dadd(194472.000000,120240.000000,78300.000000,10.871345)}
{pt3dadd(194436.000000,119928.000000,78425.000000,17.118909)}
{pt3dadd(194412.000000,119736.000000,78425.000000,16.048977)}

{create adhoc40}
{access adhoc40}
{connect adhoc40(1), adhoc39(0)}
{nseg = 1}
{strdef color color = "White"}
{pt3dclear()}
{pt3dadd(194412.000000,119736.000000,78425.000000,16.048977)}
{pt3dadd(194424.000000,119460.000000,78400.000000,10.985332)}
{pt3dadd(194556.000000,119184.000000,78400.000000,7.191199)}
{pt3dadd(194556.000000,118824.000000,78475.000000,9.093084)}
{pt3dadd(194568.000000,118476.000000,78500.000000,6.311680)}
{pt3dadd(194508.000000,118212.000000,78400.000000,6.311680)}
{pt3dadd(194472.000000,117852.000000,78400.000000,6.311680)}
{pt3dadd(194328.000000,117540.000000,78575.000000,9.863434)}
{pt3dadd(194220.000000,117264.000000,78600.000000,8.603509)}
{pt3dadd(194148.000000,117000.000000,78625.000000,12.155263)}
{pt3dadd(193968.000000,116676.000000,78625.000000,19.258772)}
{pt3dadd(193800.000000,116376.000000,78725.000000,19.258772)}

{create adhoc41}
{access adhoc41}
{connect adhoc41(1), adhoc40(0)}
{nseg = 1}
{strdef color color = "White"}
{pt3dclear()}
{pt3dadd(193800.000000,116376.000000,78725.000000,19.258772)}
{pt3dadd(193668.000000,116136.000000,78950.000000,13.735163)}
{pt3dadd(193488.000000,115908.000000,79075.000000,15.148578)}
{pt3dadd(193344.000000,115668.000000,79225.000000,12.012466)}
{pt3dadd(193272.000000,115392.000000,79350.000000,18.488422)}

{create adhoc42}
{access adhoc42}
{connect adhoc42(1), adhoc41(0)}
{nseg = 1}
{strdef color color = "White"}
{pt3dclear()}
{pt3dadd(193272.000000,115392.000000,79350.000000,18.488422)}
{pt3dadd(193140.000000,115176.000000,79400.000000,12.579102)}
{pt3dadd(193200.000000,114864.000000,79525.000000,8.147461)}
{pt3dadd(193260.000000,114552.000000,79875.000000,7.659572)}
{pt3dadd(193236.000000,114312.000000,80150.000000,4.409795)}
{pt3dadd(193092.000000,113952.000000,80300.000000,4.409795)}
{pt3dadd(193116.000000,113544.000000,80550.000000,4.409795)}
{pt3dadd(193020.000000,113208.000000,80775.000000,6.677632)}
{pt3dadd(193020.000000,112968.000000,80900.000000,3.767837)}
{pt3dadd(192912.000000,112656.000000,81175.000000,3.767837)}
{pt3dadd(192924.000000,112392.000000,81350.000000,3.767837)}
{pt3dadd(192936.000000,112116.000000,81500.000000,6.677632)}
{pt3dadd(192864.000000,111780.000000,81700.000000,4.409795)}
{pt3dadd(192732.000000,111456.000000,81975.000000,4.409795)}
{pt3dadd(192456.000000,111144.000000,82375.000000,4.409795)}
{pt3dadd(192240.000000,110856.000000,82775.000000,7.319591)}
{pt3dadd(192096.000000,110568.000000,83300.000000,4.409795)}
{pt3dadd(191892.000000,110304.000000,83525.000000,4.409795)}
{pt3dadd(191760.000000,110028.000000,83875.000000,7.961550)}
{pt3dadd(191628.000000,109740.000000,84100.000000,12.283655)}
{pt3dadd(191448.000000,109524.000000,84375.000000,14.623100)}
{pt3dadd(191340.000000,109176.000000,84500.000000,23.110527)}

{create adhoc43}
{access adhoc43}
{connect adhoc43(1), adhoc42(0)}
{nseg = 1}
{strdef color color = "White"}
{pt3dclear()}
{pt3dadd(191340.000000,109176.000000,84500.000000,23.110527)}
{pt3dadd(191160.000000,108840.000000,84225.000000,12.661558)}
{pt3dadd(190728.000000,108624.000000,84050.000000,8.196935)}
{pt3dadd(190512.000000,108360.000000,84000.000000,5.122763)}
{pt3dadd(190152.000000,108132.000000,83975.000000,2.747934)}
{pt3dadd(189972.000000,107868.000000,83875.000000,2.747934)}
{pt3dadd(189840.000000,107616.000000,83850.000000,2.747934)}
{pt3dadd(189732.000000,107364.000000,83850.000000,4.231154)}
{pt3dadd(189444.000000,107100.000000,83900.000000,2.983220)}
{pt3dadd(189048.000000,106836.000000,83925.000000,2.983220)}
{pt3dadd(188772.000000,106536.000000,83900.000000,3.579015)}
{pt3dadd(188676.000000,106308.000000,83825.000000,4.025511)}
{pt3dadd(188580.000000,106080.000000,83675.000000,3.237152)}
{pt3dadd(188484.000000,105960.000000,83600.000000,3.732480)}

{create adhoc44}
{access adhoc44}
{connect adhoc44(1), adhoc42(0)}
{nseg = 1}
{strdef color color = "White"}
{pt3dclear()}
{pt3dadd(191340.000000,109176.000000,84500.000000,23.110527)}
{pt3dadd(191688.000000,109152.000000,87300.000000,12.483237)}
{pt3dadd(191688.000000,109224.000000,87800.000000,16.734153)}
{pt3dadd(191784.000000,109284.000000,88300.000000,15.907018)}
{pt3dadd(191808.000000,109524.000000,88500.000000,23.110527)}

{create adhoc45}
{access adhoc45}
{connect adhoc45(1), adhoc44(0)}
{nseg = 1}
{strdef color color = "White"}
{pt3dclear()}
{pt3dadd(191808.000000,109524.000000,88500.000000,23.110527)}
{pt3dadd(191376.000000,108876.000000,88675.000000,13.339182)}
{pt3dadd(191100.000000,108840.000000,89050.000000,8.603509)}
{pt3dadd(190968.000000,108708.000000,89525.000000,6.549240)}
{pt3dadd(190608.000000,108504.000000,89875.000000,3.767836)}
{pt3dadd(190428.000000,108516.000000,90350.000000,3.767836)}
{pt3dadd(190248.000000,108456.000000,91000.000000,3.767836)}
{pt3dadd(190188.000000,108276.000000,91375.000000,5.607700)}
{pt3dadd(190188.000000,108288.000000,91775.000000,3.935659)}
{pt3dadd(190248.000000,108528.000000,92075.000000,5.559431)}
{pt3dadd(190332.000000,108840.000000,92350.000000,4.478975)}

{create adhoc46}
{access adhoc46}
{connect adhoc46(1), adhoc44(0)}
{nseg = 1}
{strdef color color = "White"}
{pt3dclear()}
{pt3dadd(191808.000000,109524.000000,88500.000000,23.110527)}
{pt3dadd(191868.000000,111204.000000,88650.000000,13.553168)}
{pt3dadd(191820.000000,111456.000000,88850.000000,8.731901)}
{pt3dadd(191832.000000,111708.000000,89050.000000,5.967316)}
{pt3dadd(191832.000000,111912.000000,89075.000000,3.057520)}
{pt3dadd(191856.000000,112080.000000,89150.000000,3.057520)}
{pt3dadd(191868.000000,112332.000000,89200.000000,3.057520)}
{pt3dadd(191964.000000,112524.000000,89250.000000,4.305454)}
{pt3dadd(192012.000000,112740.000000,89275.000000,2.747934)}
{pt3dadd(192012.000000,112944.000000,89300.000000,2.747934)}
{pt3dadd(191940.000000,113172.000000,89300.000000,2.747934)}
{pt3dadd(191916.000000,113388.000000,89250.000000,5.529337)}
{pt3dadd(191820.000000,113604.000000,89050.000000,5.271348)}
{pt3dadd(191784.000000,113868.000000,88925.000000,5.717844)}
{pt3dadd(191940.000000,114036.000000,89125.000000,8.529741)}
{pt3dadd(192000.000000,114180.000000,89175.000000,3.732480)}

{create adhoc47}
{access adhoc47}
{connect adhoc47(1), adhoc41(0)}
{nseg = 1}
{strdef color color = "White"}
{pt3dclear()}
{pt3dadd(193272.000000,115392.000000,79350.000000,18.488422)}
{pt3dadd(192276.000000,115380.000000,78275.000000,10.627832)}
{pt3dadd(191976.000000,115320.000000,78200.000000,5.898297)}
{pt3dadd(191736.000000,115296.000000,78200.000000,4.299816)}

{create adhoc48}
{access adhoc48}
{connect adhoc48(1), adhoc40(0)}
{nseg = 1}
{strdef color color = "White"}
{pt3dclear()}
{pt3dadd(193800.000000,116376.000000,78725.000000,19.258772)}
{pt3dadd(194064.000000,116376.000000,78150.000000,9.606299)}
{pt3dadd(194124.000000,116196.000000,77875.000000,3.110400)}

{create adhoc49}
{access adhoc49}
{connect adhoc49(1), adhoc39(0)}
{nseg = 1}
{strdef color color = "White"}
{pt3dclear()}
{pt3dadd(194412.000000,119736.000000,78425.000000,16.048977)}
{pt3dadd(194568.000000,119664.000000,79125.000000,8.178049)}
{pt3dadd(194976.000000,120120.000000,79400.000000,3.110400)}

{create adhoc50}
{access adhoc50}
{connect adhoc50(1), adhoc38(0)}
{nseg = 1}
{strdef color color = "White"}
{pt3dclear()}
{pt3dadd(195732.000000,131388.000000,76900.000000,27.732632)}
{pt3dadd(195420.000000,131400.000000,75525.000000,12.840078)}
{pt3dadd(195444.000000,131160.000000,75250.000000,8.304047)}
{pt3dadd(194904.000000,130956.000000,74825.000000,3.832474)}
{pt3dadd(194292.000000,130548.000000,74375.000000,2.274954)}
{pt3dadd(192600.000000,129864.000000,74175.000000,2.274954)}
{pt3dadd(193212.000000,129696.000000,73600.000000,2.274954)}
{pt3dadd(192900.000000,129144.000000,73050.000000,3.264899)}
{pt3dadd(192840.000000,128796.000000,72625.000000,3.049908)}
{pt3dadd(192732.000000,128172.000000,72325.000000,3.268308)}
{pt3dadd(192516.000000,128004.000000,71800.000000,4.447180)}
{pt3dadd(192528.000000,127992.000000,71650.000000,2.592000)}

{create adhoc51}
{access adhoc51}
{connect adhoc51(1), adhoc37(0)}
{nseg = 1}
{strdef color color = "White"}
{pt3dclear()}
{pt3dadd(198324.000000,138360.000000,78025.000000,25.558393)}
{pt3dadd(198288.000000,138444.000000,79050.000000,11.599354)}
{pt3dadd(198060.000000,138252.000000,79275.000000,7.559612)}
{pt3dadd(197784.000000,138060.000000,79675.000000,4.676958)}
{pt3dadd(197616.000000,137796.000000,79975.000000,3.429025)}
{pt3dadd(197748.000000,137520.000000,80675.000000,3.429025)}
{pt3dadd(197736.000000,137280.000000,81000.000000,3.429025)}
{pt3dadd(197676.000000,137040.000000,81050.000000,4.418969)}
{pt3dadd(197652.000000,136920.000000,81275.000000,2.489945)}
{pt3dadd(198108.000000,136920.000000,81600.000000,2.489945)}
{pt3dadd(198456.000000,136668.000000,81800.000000,4.047465)}
{pt3dadd(198516.000000,136452.000000,82050.000000,5.037410)}
{pt3dadd(198576.000000,136248.000000,82450.000000,5.745775)}
{pt3dadd(198588.000000,136008.000000,82500.000000,6.449724)}

{create adhoc52}
{access adhoc52}
{connect adhoc52(1), adhoc36(0)}
{nseg = 1}
{strdef color color = "White"}
{pt3dclear()}
{pt3dadd(198984.000000,141540.000000,78375.000000,39.934990)}
{pt3dadd(198984.000000,141540.000000,80725.000000,26.512861)}
{pt3dadd(199116.000000,141768.000000,81200.000000,16.916239)}
{pt3dadd(199164.000000,141960.000000,81575.000000,11.145123)}

{create adhoc53}
{access adhoc53}
{connect adhoc53(1), adhoc52(0)}
{nseg = 1}
{strdef color color = "White"}
{pt3dclear()}
{pt3dadd(199164.000000,141960.000000,81575.000000,11.145123)}
{pt3dadd(198756.000000,142056.000000,81875.000000,7.739669)}

{create adhoc54}
{access adhoc54}
{connect adhoc54(1), adhoc53(0)}
{nseg = 1}
{strdef color color = "White"}
{pt3dclear()}
{pt3dadd(198756.000000,142056.000000,81875.000000,7.739669)}
{pt3dadd(199176.000000,142332.000000,82450.000000,14.790739)}

{create adhoc55}
{access adhoc55}
{connect adhoc55(1), adhoc53(0)}
{nseg = 1}
{strdef color color = "White"}
{pt3dclear()}
{pt3dadd(198756.000000,142056.000000,81875.000000,7.739669)}
{pt3dadd(197880.000000,141996.000000,81750.000000,6.175757)}
{pt3dadd(197232.000000,142104.000000,81750.000000,5.277515)}
{pt3dadd(196992.000000,142464.000000,81900.000000,3.120101)}
{pt3dadd(196824.000000,142428.000000,81975.000000,3.732480)}

{create adhoc56}
{access adhoc56}
{connect adhoc56(1), adhoc52(0)}
{nseg = 1}
{strdef color color = "White"}
{pt3dclear()}
{pt3dadd(199164.000000,141960.000000,81575.000000,11.145123)}
{pt3dadd(199104.000000,142380.000000,82850.000000,8.673090)}
{pt3dadd(198756.000000,142632.000000,83375.000000,7.361374)}
{pt3dadd(198768.000000,142848.000000,83825.000000,6.028145)}
{pt3dadd(198876.000000,143184.000000,84200.000000,5.088859)}
{pt3dadd(198960.000000,143568.000000,84700.000000,4.478975)}

{create adhoc57}
{access adhoc57}
{connect adhoc57(1), adhoc35(0)}
{nseg = 1}
{strdef color color = "White"}
{pt3dclear()}
{pt3dadd(198984.000000,146616.000000,78100.000000,25.558392)}
{pt3dadd(198360.000000,148908.000000,75400.000000,14.155137)}
{pt3dadd(197928.000000,148908.000000,73425.000000,9.093082)}
{pt3dadd(197868.000000,149484.000000,73050.000000,10.637236)}
{pt3dadd(197772.000000,149652.000000,72400.000000,12.880497)}
{pt3dadd(197784.000000,149508.000000,71825.000000,18.127024)}
{pt3dadd(197376.000000,149196.000000,71250.000000,29.211706)}
{pt3dadd(197280.000000,149256.000000,71075.000000,27.732632)}

{create adhoc58}
{access adhoc58}
{connect adhoc58(1), adhoc57(0)}
{nseg = 1}
{strdef color color = "White"}
{pt3dclear()}
{pt3dadd(197280.000000,149256.000000,71075.000000,27.732632)}
{pt3dadd(197112.000000,150132.000000,70775.000000,15.093870)}
{pt3dadd(196440.000000,150708.000000,70250.000000,9.656322)}
{pt3dadd(196032.000000,151212.000000,69650.000000,8.547017)}
{pt3dadd(195780.000000,151680.000000,69075.000000,5.637222)}
{pt3dadd(195408.000000,152328.000000,68550.000000,5.637222)}
{pt3dadd(194676.000000,152556.000000,67925.000000,5.637222)}
{pt3dadd(194064.000000,153120.000000,67300.000000,8.886999)}
{pt3dadd(193788.000000,153588.000000,66825.000000,5.935793)}
{pt3dadd(193548.000000,153708.000000,66275.000000,8.892989)}
{pt3dadd(193452.000000,153720.000000,65950.000000,7.430083)}

{create adhoc59}
{access adhoc59}
{connect adhoc59(1), adhoc57(0)}
{nseg = 1}
{strdef color color = "White"}
{pt3dclear()}
{pt3dadd(197280.000000,149256.000000,71075.000000,27.732632)}
{pt3dadd(196992.000000,148548.000000,71100.000000,15.907018)}
{pt3dadd(196500.000000,147972.000000,71100.000000,10.144211)}
{pt3dadd(196260.000000,147732.000000,70800.000000,7.272514)}
{pt3dadd(196200.000000,147468.000000,70725.000000,3.874829)}
{pt3dadd(196056.000000,147108.000000,70625.000000,3.874829)}
{pt3dadd(195996.000000,146844.000000,70500.000000,3.874829)}
{pt3dadd(195636.000000,145476.000000,70350.000000,6.249659)}
{pt3dadd(194832.000000,144192.000000,69525.000000,3.874829)}
{pt3dadd(194328.000000,143352.000000,68975.000000,3.874829)}
{pt3dadd(194232.000000,143040.000000,68775.000000,3.874829)}
{pt3dadd(194064.000000,142752.000000,68575.000000,6.249659)}
{pt3dadd(193896.000000,142452.000000,68650.000000,3.874829)}
{pt3dadd(193728.000000,142080.000000,68550.000000,3.874829)}
{pt3dadd(193524.000000,141732.000000,68375.000000,3.874829)}
{pt3dadd(193164.000000,140964.000000,68875.000000,6.249659)}
{pt3dadd(192984.000000,140448.000000,69375.000000,5.432350)}
{pt3dadd(192828.000000,139572.000000,69575.000000,5.878846)}
{pt3dadd(192852.000000,139248.000000,69250.000000,8.798076)}
{pt3dadd(192816.000000,139188.000000,69075.000000,3.732480)}

{create adhoc60}
{access adhoc60}
{connect adhoc60(1), adhoc34(0)}
{nseg = 1}
{strdef color color = "White"}
{pt3dclear()}
{pt3dadd(198552.000000,149076.000000,77225.000000,45.013573)}
{pt3dadd(197940.000000,148764.000000,78675.000000,21.299455)}
{pt3dadd(197832.000000,148560.000000,78900.000000,7.539091)}
{pt3dadd(197844.000000,148416.000000,78875.000000,3.732480)}

{create adhoc61}
{access adhoc61}
{connect adhoc61(1), adhoc33(0)}
{nseg = 1}
{strdef color color = "White"}
{pt3dclear()}
{pt3dadd(199020.000000,156924.000000,77775.000000,47.921990)}
{pt3dadd(197964.000000,156924.000000,77000.000000,19.569864)}
{pt3dadd(197604.000000,156624.000000,76725.000000,12.341918)}
{pt3dadd(197280.000000,156324.000000,76500.000000,6.683290)}
{pt3dadd(197148.000000,156108.000000,76350.000000,5.125770)}
{pt3dadd(196752.000000,155892.000000,76000.000000,7.500599)}
{pt3dadd(196404.000000,155712.000000,75425.000000,9.058120)}
{pt3dadd(196452.000000,155484.000000,75675.000000,8.053916)}
{pt3dadd(196416.000000,155280.000000,75725.000000,9.287602)}

{create adhoc62}
{access adhoc62}
{connect adhoc62(1), adhoc32(0)}
{nseg = 1}
{strdef color color = "White"}
{pt3dclear()}
{pt3dadd(198708.000000,160032.000000,77750.000000,31.947992)}
{pt3dadd(197628.000000,160008.000000,78625.000000,13.729220)}
{pt3dadd(197496.000000,159948.000000,80050.000000,8.837532)}
{pt3dadd(197532.000000,160116.000000,80250.000000,3.933950)}
{pt3dadd(197532.000000,160428.000000,80575.000000,2.686016)}
{pt3dadd(197796.000000,160692.000000,80850.000000,3.675961)}
{pt3dadd(198036.000000,160956.000000,81200.000000,4.665906)}
{pt3dadd(198060.000000,161304.000000,80950.000000,4.799816)}
{pt3dadd(198000.000000,161508.000000,80825.000000,6.449724)}

{create adhoc63}
{access adhoc63}
{connect adhoc63(1), adhoc31(0)}
{nseg = 1}
{strdef color color = "White"}
{pt3dclear()}
{pt3dadd(198744.000000,163200.000000,76950.000000,47.921990)}
{pt3dadd(197484.000000,163224.000000,75525.000000,20.189038)}
{pt3dadd(197208.000000,162936.000000,75200.000000,12.713423)}
{pt3dadd(196812.000000,162324.000000,74675.000000,5.696861)}
{pt3dadd(196404.000000,161928.000000,74300.000000,3.767837)}
{pt3dadd(196008.000000,161724.000000,73950.000000,3.767837)}
{pt3dadd(195204.000000,161244.000000,73550.000000,3.767837)}
{pt3dadd(194832.000000,160944.000000,72975.000000,5.696861)}
{pt3dadd(194292.000000,160788.000000,72575.000000,3.429025)}
{pt3dadd(193740.000000,160728.000000,72050.000000,3.429025)}
{pt3dadd(193236.000000,160704.000000,71525.000000,5.358049)}
{pt3dadd(192984.000000,160500.000000,70975.000000,6.605983)}
{pt3dadd(192924.000000,160284.000000,70500.000000,6.794931)}
{pt3dadd(192792.000000,160284.000000,70200.000000,7.739669)}

{create adhoc64}
{access adhoc64}
{connect adhoc64(1), adhoc30(0)}
{nseg = 1}
{strdef color color = "White"}
{pt3dclear()}
{pt3dadd(198948.000000,165408.000000,76925.000000,46.005108)}
{pt3dadd(197652.000000,165444.000000,78050.000000,19.401475)}
{pt3dadd(196800.000000,164952.000000,78400.000000,12.240885)}
{pt3dadd(196248.000000,164124.000000,78650.000000,4.897384)}
{pt3dadd(195168.000000,163176.000000,78800.000000,3.057520)}
{pt3dadd(193644.000000,162984.000000,78575.000000,3.057520)}
{pt3dadd(192204.000000,163008.000000,78750.000000,6.609275)}
{pt3dadd(190884.000000,163092.000000,78875.000000,9.267423)}
{pt3dadd(189888.000000,162204.000000,78875.000000,11.849837)}
{pt3dadd(189804.000000,161988.000000,78575.000000,14.790740)}

{create adhoc65}
{access adhoc65}
{connect adhoc65(1), adhoc64(0)}
{nseg = 1}
{strdef color color = "White"}
{pt3dclear()}
{pt3dadd(189804.000000,161988.000000,78575.000000,14.790740)}
{pt3dadd(189972.000000,161640.000000,78975.000000,10.606004)}
{pt3dadd(189984.000000,161412.000000,78975.000000,7.739669)}

{create adhoc66}
{access adhoc66}
{connect adhoc66(1), adhoc64(0)}
{nseg = 1}
{strdef color color = "White"}
{pt3dclear()}
{pt3dadd(189804.000000,161988.000000,78575.000000,14.790740)}
{pt3dadd(189060.000000,161964.000000,78100.000000,8.283399)}
{pt3dadd(188628.000000,161856.000000,78150.000000,5.570039)}
{pt3dadd(187884.000000,161712.000000,78150.000000,7.049113)}
{pt3dadd(186672.000000,161724.000000,77725.000000,9.188976)}
{pt3dadd(184788.000000,161628.000000,77950.000000,14.314961)}
{pt3dadd(184572.000000,161376.000000,77700.000000,19.258772)}

{create adhoc67}
{access adhoc67}
{connect adhoc67(1), adhoc66(0)}
{nseg = 1}
{strdef color color = "White"}
{pt3dclear()}
{pt3dadd(184572.000000,161376.000000,77700.000000,19.258772)}
{pt3dadd(184320.000000,161400.000000,77650.000000,12.269250)}
{pt3dadd(184092.000000,161424.000000,77600.000000,7.961550)}
{pt3dadd(183828.000000,161328.000000,77525.000000,6.677632)}
{pt3dadd(183552.000000,161304.000000,77450.000000,3.767837)}
{pt3dadd(183276.000000,161400.000000,77525.000000,3.767837)}
{pt3dadd(183036.000000,161400.000000,77525.000000,3.767837)}
{pt3dadd(182760.000000,161328.000000,77550.000000,5.696861)}
{pt3dadd(182484.000000,161376.000000,77550.000000,3.429025)}
{pt3dadd(182280.000000,161424.000000,77550.000000,3.429025)}
{pt3dadd(182028.000000,161424.000000,77550.000000,3.429025)}
{pt3dadd(181812.000000,161472.000000,77525.000000,5.183294)}
{pt3dadd(181596.000000,161484.000000,77525.000000,3.254269)}
{pt3dadd(181344.000000,161640.000000,77500.000000,3.254269)}
{pt3dadd(181128.000000,161652.000000,77500.000000,3.254269)}
{pt3dadd(180864.000000,161712.000000,77425.000000,4.737489)}
{pt3dadd(180600.000000,161616.000000,77350.000000,2.983220)}
{pt3dadd(180276.000000,161556.000000,77275.000000,2.983220)}
{pt3dadd(179952.000000,161652.000000,77200.000000,2.983220)}
{pt3dadd(179748.000000,161616.000000,77000.000000,4.912244)}
{pt3dadd(179460.000000,161556.000000,76925.000000,3.429025)}
{pt3dadd(179280.000000,161484.000000,76750.000000,3.429025)}
{pt3dadd(179004.000000,161316.000000,76550.000000,3.429025)}
{pt3dadd(178752.000000,161148.000000,76375.000000,4.986545)}
{pt3dadd(178512.000000,160932.000000,76150.000000,3.057520)}
{pt3dadd(178164.000000,160692.000000,76000.000000,3.057520)}
{pt3dadd(177948.000000,160824.000000,75950.000000,3.057520)}
{pt3dadd(177240.000000,160284.000000,75700.000000,4.615041)}
{pt3dadd(176724.000000,160092.000000,75175.000000,3.057520)}
{pt3dadd(176184.000000,159780.000000,74775.000000,3.057520)}
{pt3dadd(175740.000000,159492.000000,74325.000000,3.057520)}
{pt3dadd(175332.000000,159108.000000,73925.000000,5.222644)}
{pt3dadd(174816.000000,158640.000000,73275.000000,3.665123)}
{pt3dadd(174564.000000,158208.000000,72625.000000,3.665123)}
{pt3dadd(174360.000000,157992.000000,72225.000000,3.665123)}
{pt3dadd(173988.000000,157596.000000,71650.000000,5.148343)}
{pt3dadd(173640.000000,157152.000000,71050.000000,2.983220)}
{pt3dadd(172920.000000,156948.000000,70500.000000,2.983220)}
{pt3dadd(172344.000000,156828.000000,69900.000000,2.983220)}
{pt3dadd(171612.000000,156720.000000,69450.000000,5.823836)}
{pt3dadd(171384.000000,156576.000000,69075.000000,4.340616)}
{pt3dadd(171120.000000,156480.000000,68700.000000,4.340616)}
{pt3dadd(170820.000000,156300.000000,68400.000000,4.340616)}
{pt3dadd(170544.000000,156240.000000,68150.000000,5.588550)}
{pt3dadd(170292.000000,156132.000000,67800.000000,2.747934)}
{pt3dadd(170004.000000,155964.000000,67525.000000,2.747934)}
{pt3dadd(169668.000000,155904.000000,67200.000000,2.747934)}
{pt3dadd(169332.000000,155760.000000,66825.000000,3.762666)}
{pt3dadd(169032.000000,155628.000000,66500.000000,3.453079)}
{pt3dadd(168780.000000,155532.000000,66350.000000,4.013043)}
{pt3dadd(168504.000000,155460.000000,66275.000000,5.688405)}
{pt3dadd(168156.000000,155424.000000,65825.000000,4.299817)}

{create adhoc68}
{access adhoc68}
{connect adhoc68(1), adhoc66(0)}
{nseg = 1}
{strdef color color = "White"}
{pt3dclear()}
{pt3dadd(184572.000000,161376.000000,77700.000000,19.258772)}
{pt3dadd(184536.000000,160392.000000,77425.000000,10.015458)}
{pt3dadd(184596.000000,159744.000000,77675.000000,6.609275)}
{pt3dadd(184476.000000,158832.000000,78325.000000,4.047465)}
{pt3dadd(184152.000000,158592.000000,78425.000000,2.489945)}
{pt3dadd(183744.000000,158364.000000,78550.000000,2.489945)}
{pt3dadd(183420.000000,158136.000000,78875.000000,2.489945)}
{pt3dadd(183144.000000,157932.000000,79050.000000,3.737879)}
{pt3dadd(183204.000000,157704.000000,79200.000000,2.747934)}
{pt3dadd(181752.000000,157536.000000,79525.000000,2.747934)}
{pt3dadd(181104.000000,157728.000000,79875.000000,2.747934)}
{pt3dadd(180996.000000,157812.000000,80200.000000,3.874510)}
{pt3dadd(180600.000000,157776.000000,80550.000000,2.626576)}
{pt3dadd(180384.000000,157452.000000,80825.000000,2.626576)}
{pt3dadd(180120.000000,156756.000000,80800.000000,2.626576)}
{pt3dadd(179856.000000,156408.000000,80850.000000,4.038467)}
{pt3dadd(179628.000000,156312.000000,80950.000000,2.911891)}
{pt3dadd(179352.000000,156252.000000,81050.000000,2.911891)}
{pt3dadd(179112.000000,156264.000000,81125.000000,2.911891)}
{pt3dadd(178848.000000,156156.000000,81325.000000,5.338119)}
{pt3dadd(178572.000000,156216.000000,81600.000000,3.926229)}
{pt3dadd(178368.000000,156240.000000,81900.000000,3.926229)}
{pt3dadd(178164.000000,156108.000000,82275.000000,3.926229)}
{pt3dadd(177984.000000,156276.000000,82875.000000,6.707632)}
{pt3dadd(178068.000000,156504.000000,83250.000000,4.281404)}
{pt3dadd(178212.000000,156516.000000,83725.000000,4.281404)}
{pt3dadd(178368.000000,156156.000000,84350.000000,4.281404)}
{pt3dadd(178344.000000,156024.000000,84750.000000,7.191199)}
{pt3dadd(178128.000000,155676.000000,85175.000000,4.409795)}
{pt3dadd(178140.000000,155652.000000,85525.000000,6.338820)}
{pt3dadd(177996.000000,156072.000000,85875.000000,7.328765)}
{pt3dadd(178044.000000,156420.000000,86250.000000,6.364949)}
{pt3dadd(177804.000000,156420.000000,85950.000000,6.449724)}

{create adhoc69}
{access adhoc69}
{connect adhoc69(1), adhoc29(0)}
{nseg = 1}
{strdef color color = "White"}
{pt3dclear()}
{pt3dadd(198648.000000,167556.000000,76900.000000,39.934990)}
{pt3dadd(197664.000000,167436.000000,78025.000000,16.391553)}
{pt3dadd(197376.000000,167268.000000,78350.000000,10.434932)}
{pt3dadd(197472.000000,167172.000000,78750.000000,3.686281)}
{pt3dadd(197568.000000,167136.000000,79175.000000,2.884843)}
{pt3dadd(197460.000000,166992.000000,79500.000000,3.808072)}
{pt3dadd(197256.000000,166584.000000,79850.000000,3.732480)}

{create adhoc70}
{access adhoc70}
{connect adhoc70(1), adhoc28(0)}
{nseg = 1}
{strdef color color = "White"}
{pt3dclear()}
{pt3dadd(196836.000000,170664.000000,76275.000000,39.934990)}
{pt3dadd(195276.000000,170652.000000,77325.000000,16.189290)}
{pt3dadd(195132.000000,170700.000000,77550.000000,11.871094)}
{pt3dadd(194784.000000,171240.000000,77925.000000,5.122443)}
{pt3dadd(194832.000000,171396.000000,78350.000000,5.659779)}
{pt3dadd(194988.000000,171372.000000,78650.000000,6.191735)}

{create adhoc71}
{access adhoc71}
{connect adhoc71(1), adhoc11(0)}
{nseg = 1}
{strdef color color = "White"}
{pt3dclear()}
{pt3dadd(193788.000000,183924.000000,72000.000000,57.506386)}
{pt3dadd(190224.000000,186432.000000,71350.000000,27.372304)}
{pt3dadd(189648.000000,186288.000000,70925.000000,22.269909)}
{pt3dadd(189552.000000,186072.000000,70325.000000,14.620386)}
{pt3dadd(189492.000000,186312.000000,69800.000000,16.163801)}
{pt3dadd(189432.000000,186480.000000,69500.000000,19.258772)}

{create adhoc72}
{access adhoc72}
{connect adhoc72(1), adhoc71(0)}
{nseg = 1}
{strdef color color = "White"}
{pt3dclear()}
{pt3dadd(189432.000000,186480.000000,69500.000000,19.258772)}
{pt3dadd(189768.000000,185292.000000,69500.000000,13.339181)}
{pt3dadd(189768.000000,184824.000000,69225.000000,8.603509)}
{pt3dadd(189600.000000,184008.000000,68750.000000,7.426584)}
{pt3dadd(189204.000000,183276.000000,68325.000000,6.656233)}
{pt3dadd(189264.000000,182700.000000,67750.000000,10.093722)}
{pt3dadd(188976.000000,182184.000000,67150.000000,15.407018)}

{create adhoc73}
{access adhoc73}
{connect adhoc73(1), adhoc72(0)}
{nseg = 1}
{strdef color color = "White"}
{pt3dclear()}
{pt3dadd(188976.000000,182184.000000,67150.000000,15.407018)}
{pt3dadd(188460.000000,181104.000000,67125.000000,8.215562)}
{pt3dadd(188388.000000,180444.000000,67125.000000,5.529337)}
{pt3dadd(188256.000000,180228.000000,66900.000000,3.737879)}
{pt3dadd(188040.000000,180012.000000,67025.000000,3.264899)}
{pt3dadd(187980.000000,179808.000000,67025.000000,3.586979)}
{pt3dadd(187812.000000,179580.000000,67125.000000,4.978298)}
{pt3dadd(187680.000000,179364.000000,67075.000000,3.110400)}

{create adhoc74}
{access adhoc74}
{connect adhoc74(1), adhoc72(0)}
{nseg = 1}
{strdef color color = "White"}
{pt3dclear()}
{pt3dadd(188976.000000,182184.000000,67150.000000,15.407018)}
{pt3dadd(188808.000000,182112.000000,66875.000000,12.055263)}
{pt3dadd(188772.000000,182016.000000,66375.000000,7.833158)}
{pt3dadd(188772.000000,182208.000000,65950.000000,6.609275)}
{pt3dadd(188532.000000,181968.000000,65275.000000,3.057520)}
{pt3dadd(188316.000000,181644.000000,64650.000000,3.057520)}
{pt3dadd(187620.000000,181404.000000,64100.000000,3.057520)}
{pt3dadd(187296.000000,181080.000000,63650.000000,3.653315)}
{pt3dadd(186972.000000,180684.000000,63100.000000,2.095795)}
{pt3dadd(186912.000000,180408.000000,62750.000000,2.095795)}
{pt3dadd(186720.000000,180168.000000,62425.000000,2.095795)}
{pt3dadd(186552.000000,179772.000000,61950.000000,3.653315)}
{pt3dadd(186456.000000,179556.000000,61500.000000,3.057520)}
{pt3dadd(186420.000000,179520.000000,61200.000000,3.057520)}
{pt3dadd(186240.000000,179208.000000,60825.000000,3.057520)}
{pt3dadd(185844.000000,178764.000000,60525.000000,4.047465)}
{pt3dadd(185352.000000,178404.000000,60050.000000,3.479890)}
{pt3dadd(185172.000000,178236.000000,59675.000000,4.799816)}
{pt3dadd(185100.000000,178176.000000,59475.000000,6.449724)}

{create adhoc75}
{access adhoc75}
{connect adhoc75(1), adhoc71(0)}
{nseg = 1}
{strdef color color = "White"}
{pt3dclear()}
{pt3dadd(189432.000000,186480.000000,69500.000000,19.258772)}
{pt3dadd(188448.000000,186840.000000,69175.000000,13.082398)}
{pt3dadd(187308.000000,187080.000000,69000.000000,8.449439)}
{pt3dadd(186576.000000,187476.000000,68100.000000,7.807480)}
{pt3dadd(186168.000000,187824.000000,67650.000000,4.409795)}
{pt3dadd(185808.000000,188148.000000,67200.000000,4.409795)}
{pt3dadd(185124.000000,188544.000000,66775.000000,4.409795)}
{pt3dadd(184752.000000,188772.000000,66400.000000,5.967316)}
{pt3dadd(184500.000000,188892.000000,66375.000000,3.057520)}
{pt3dadd(184236.000000,189228.000000,66725.000000,3.057520)}
{pt3dadd(183972.000000,189564.000000,67100.000000,3.057520)}
{pt3dadd(183636.000000,189756.000000,67000.000000,3.832474)}
{pt3dadd(183336.000000,189768.000000,66850.000000,2.274954)}
{pt3dadd(183060.000000,189900.000000,66800.000000,3.049908)}
{pt3dadd(182796.000000,190068.000000,66875.000000,3.496404)}
{pt3dadd(182592.000000,190188.000000,66850.000000,3.535750)}
{pt3dadd(182316.000000,190320.000000,66850.000000,3.732480)}

{create adhoc76}
{access adhoc76}
{connect adhoc76(1), adhoc2(0)}
{nseg = 1}
{strdef color color = "White"}
{pt3dclear()}
{pt3dadd(188652.000000,207744.000000,87275.000000,126.600720)}
{pt3dadd(188292.000000,208284.000000,86675.000000,95.450513)}
{pt3dadd(187920.000000,208452.000000,86125.000000,57.870308)}
{pt3dadd(187500.000000,209028.000000,85425.000000,47.813554)}
{pt3dadd(187416.000000,209448.000000,84625.000000,16.463390)}
{pt3dadd(186840.000000,209304.000000,83700.000000,16.463390)}
{pt3dadd(186492.000000,209580.000000,83375.000000,16.463390)}
{pt3dadd(185940.000000,210636.000000,84150.000000,32.062755)}
{pt3dadd(185460.000000,210888.000000,82800.000000,17.099365)}
{pt3dadd(185196.000000,210948.000000,82375.000000,17.099365)}
{pt3dadd(184836.000000,211296.000000,81975.000000,17.099365)}
{pt3dadd(184368.000000,211716.000000,81750.000000,27.840591)}
{pt3dadd(183828.000000,211680.000000,81250.000000,22.312351)}
{pt3dadd(183384.000000,211992.000000,81100.000000,36.187252)}
{pt3dadd(183156.000000,212112.000000,80875.000000,51.855630)}

{create adhoc77}
{access adhoc77}
{connect adhoc77(1), adhoc76(0)}
{nseg = 1}
{strdef color color = "White"}
{pt3dclear()}
{pt3dadd(183156.000000,212112.000000,80875.000000,51.855630)}
{pt3dadd(182076.000000,215820.000000,81750.000000,22.243259)}
{pt3dadd(181440.000000,217656.000000,81825.000000,13.945955)}
{pt3dadd(181224.000000,217620.000000,81550.000000,6.656233)}
{pt3dadd(181032.000000,217668.000000,81325.000000,4.281404)}
{pt3dadd(180804.000000,217932.000000,81350.000000,4.281404)}
{pt3dadd(180504.000000,218028.000000,81175.000000,4.281404)}
{pt3dadd(180216.000000,218304.000000,81100.000000,6.656233)}
{pt3dadd(179952.000000,218436.000000,81050.000000,3.874829)}
{pt3dadd(179712.000000,218592.000000,80900.000000,3.874829)}
{pt3dadd(179484.000000,218688.000000,80950.000000,3.874829)}
{pt3dadd(179232.000000,218952.000000,80800.000000,6.656233)}
{pt3dadd(178920.000000,218976.000000,80625.000000,4.281404)}
{pt3dadd(178632.000000,219660.000000,80600.000000,4.281404)}
{pt3dadd(178368.000000,219996.000000,80500.000000,4.281404)}
{pt3dadd(178152.000000,220164.000000,80525.000000,7.679088)}
{pt3dadd(177840.000000,220248.000000,80375.000000,4.897684)}
{pt3dadd(177588.000000,220308.000000,80200.000000,4.897684)}
{pt3dadd(177312.000000,220740.000000,80250.000000,4.897684)}
{pt3dadd(177024.000000,220860.000000,80375.000000,10.144210)}
{pt3dadd(176760.000000,221016.000000,80225.000000,9.656322)}
{pt3dadd(176496.000000,221244.000000,80225.000000,15.093870)}
{pt3dadd(176232.000000,221256.000000,80225.000000,16.048977)}

{create adhoc78}
{access adhoc78}
{connect adhoc78(1), adhoc77(0)}
{nseg = 1}
{strdef color color = "White"}
{pt3dclear()}
{pt3dadd(176232.000000,221256.000000,80225.000000,16.048977)}
{pt3dadd(176076.000000,221640.000000,81000.000000,8.821692)}
{pt3dadd(175824.000000,221916.000000,81275.000000,5.893015)}
{pt3dadd(175596.000000,222108.000000,81400.000000,4.231154)}
{pt3dadd(175416.000000,222084.000000,81450.000000,2.747934)}
{pt3dadd(175236.000000,222168.000000,81450.000000,2.747934)}
{pt3dadd(175008.000000,222396.000000,81650.000000,2.747934)}
{pt3dadd(174828.000000,222744.000000,82125.000000,5.122763)}
{pt3dadd(174672.000000,222936.000000,82300.000000,3.874829)}
{pt3dadd(174468.000000,222996.000000,82300.000000,3.874829)}
{pt3dadd(174252.000000,223428.000000,82650.000000,5.803854)}
{pt3dadd(174000.000000,223764.000000,83000.000000,7.051788)}
{pt3dadd(173928.000000,224112.000000,83375.000000,6.794931)}
{pt3dadd(173892.000000,224244.000000,83800.000000,7.739669)}

{create adhoc79}
{access adhoc79}
{connect adhoc79(1), adhoc78(0)}
{nseg = 1}
{strdef color color = "White"}
{pt3dclear()}
{pt3dadd(173892.000000,224244.000000,83800.000000,7.739669)}
{pt3dadd(174828.000000,223956.000000,83900.000000,4.871480)}
{pt3dadd(175812.000000,223404.000000,84000.000000,4.415880)}
{pt3dadd(176100.000000,223272.000000,84275.000000,2.988320)}
{pt3dadd(176232.000000,223332.000000,84375.000000,2.985984)}

{create adhoc80}
{access adhoc80}
{connect adhoc80(1), adhoc78(0)}
{nseg = 1}
{strdef color color = "White"}
{pt3dclear()}
{pt3dadd(173892.000000,224244.000000,83800.000000,7.739669)}
{pt3dadd(173376.000000,224976.000000,83950.000000,4.832866)}
{pt3dadd(173244.000000,225444.000000,84225.000000,3.499720)}
{pt3dadd(173148.000000,225804.000000,84575.000000,3.499720)}
{pt3dadd(173196.000000,226716.000000,84950.000000,3.194430)}
{pt3dadd(172956.000000,227364.000000,85150.000000,4.324050)}
{pt3dadd(172728.000000,227940.000000,85350.000000,3.732480)}

{create adhoc81}
{access adhoc81}
{connect adhoc81(1), adhoc77(0)}
{nseg = 1}
{strdef color color = "White"}
{pt3dclear()}
{pt3dadd(176232.000000,221256.000000,80225.000000,16.048977)}
{pt3dadd(176052.000000,221652.000000,79575.000000,13.553168)}
{pt3dadd(175776.000000,221856.000000,79300.000000,8.731901)}
{pt3dadd(175464.000000,222024.000000,79125.000000,9.959327)}
{pt3dadd(175164.000000,222108.000000,78975.000000,5.637221)}
{pt3dadd(174840.000000,222444.000000,78875.000000,5.637221)}
{pt3dadd(174540.000000,222504.000000,78700.000000,5.637221)}
{pt3dadd(174204.000000,222816.000000,78475.000000,10.883748)}
{pt3dadd(173916.000000,222936.000000,78300.000000,11.068632)}
{pt3dadd(173688.000000,223092.000000,78275.000000,17.447720)}
{pt3dadd(173388.000000,223248.000000,78250.000000,23.110527)}

{create adhoc82}
{access adhoc82}
{connect adhoc82(1), adhoc81(0)}
{nseg = 1}
{strdef color color = "White"}
{pt3dclear()}
{pt3dadd(173388.000000,223248.000000,78250.000000,23.110527)}
{pt3dadd(173460.000000,224076.000000,79075.000000,11.299376)}
{pt3dadd(173424.000000,224724.000000,79375.000000,7.379626)}
{pt3dadd(173136.000000,225792.000000,79825.000000,5.432350)}
{pt3dadd(172632.000000,227940.000000,80300.000000,3.874829)}
{pt3dadd(171948.000000,228816.000000,80725.000000,7.272514)}
{pt3dadd(171948.000000,228984.000000,80925.000000,9.647343)}
{pt3dadd(171660.000000,229224.000000,81125.000000,11.120856)}
{pt3dadd(171624.000000,229524.000000,81250.000000,13.374147)}

{create adhoc83}
{access adhoc83}
{connect adhoc83(1), adhoc82(0)}
{nseg = 1}
{strdef color color = "White"}
{pt3dclear()}
{pt3dadd(171624.000000,229524.000000,81250.000000,13.374147)}
{pt3dadd(172488.000000,229716.000000,81625.000000,6.202209)}
{pt3dadd(172752.000000,230016.000000,81850.000000,4.767821)}
{pt3dadd(172896.000000,230028.000000,82125.000000,2.839488)}
{pt3dadd(173088.000000,230052.000000,82200.000000,2.988320)}
{pt3dadd(173208.000000,230028.000000,82250.000000,3.732480)}

{create adhoc84}
{access adhoc84}
{connect adhoc84(1), adhoc82(0)}
{nseg = 1}
{strdef color color = "White"}
{pt3dclear()}
{pt3dadd(171624.000000,229524.000000,81250.000000,13.374147)}
{pt3dadd(171312.000000,229728.000000,81300.000000,9.888295)}
{pt3dadd(171048.000000,229824.000000,81575.000000,6.532977)}
{pt3dadd(170856.000000,230064.000000,81925.000000,6.087172)}
{pt3dadd(170640.000000,230640.000000,82250.000000,3.429025)}
{pt3dadd(170436.000000,230832.000000,82250.000000,5.803854)}
{pt3dadd(170244.000000,231168.000000,82425.000000,7.732879)}
{pt3dadd(170088.000000,231444.000000,82525.000000,8.673090)}
{pt3dadd(169920.000000,231636.000000,82575.000000,11.145123)}

{create adhoc85}
{access adhoc85}
{connect adhoc85(1), adhoc81(0)}
{nseg = 1}
{strdef color color = "White"}
{pt3dclear()}
{pt3dadd(173388.000000,223248.000000,78250.000000,23.110527)}
{pt3dadd(173184.000000,223104.000000,77575.000000,13.553168)}
{pt3dadd(172896.000000,223032.000000,76750.000000,8.731901)}
{pt3dadd(172656.000000,223116.000000,76425.000000,8.731901)}
{pt3dadd(172440.000000,223392.000000,76175.000000,5.822105)}
{pt3dadd(172212.000000,223596.000000,75650.000000,5.822105)}
{pt3dadd(172008.000000,223860.000000,75500.000000,5.822105)}
{pt3dadd(171828.000000,224436.000000,75175.000000,10.144211)}
{pt3dadd(171552.000000,224568.000000,74500.000000,5.822105)}
{pt3dadd(171384.000000,225324.000000,73925.000000,5.822105)}
{pt3dadd(171132.000000,225636.000000,73625.000000,5.822105)}
{pt3dadd(170856.000000,225864.000000,73525.000000,10.144211)}
{pt3dadd(170652.000000,226068.000000,73600.000000,5.822105)}
{pt3dadd(170424.000000,226308.000000,73425.000000,5.822105)}
{pt3dadd(170256.000000,226464.000000,73375.000000,5.822105)}
{pt3dadd(170016.000000,226740.000000,73400.000000,10.144211)}
{pt3dadd(169728.000000,227232.000000,73400.000000,9.373860)}
{pt3dadd(169344.000000,227796.000000,73350.000000,12.771544)}
{pt3dadd(169056.000000,227964.000000,73375.000000,20.285907)}
{pt3dadd(168756.000000,228468.000000,73475.000000,18.488422)}

{create adhoc86}
{access adhoc86}
{connect adhoc86(1), adhoc85(0)}
{nseg = 1}
{strdef color color = "White"}
{pt3dclear()}
{pt3dadd(168756.000000,228468.000000,73475.000000,18.488422)}
{pt3dadd(167628.000000,228516.000000,72900.000000,10.377848)}
{pt3dadd(167160.000000,228516.000000,72775.000000,6.826709)}
{pt3dadd(166884.000000,228684.000000,72700.000000,3.988988)}
{pt3dadd(166596.000000,228768.000000,72625.000000,2.059963)}
{pt3dadd(166332.000000,228780.000000,72550.000000,2.059963)}
{pt3dadd(166572.000000,228720.000000,72625.000000,2.059963)}
{pt3dadd(165552.000000,228888.000000,72400.000000,2.834917)}
{pt3dadd(164868.000000,229104.000000,72450.000000,2.274954)}
{pt3dadd(163284.000000,229380.000000,72575.000000,2.274954)}
{pt3dadd(162552.000000,229344.000000,72500.000000,2.274954)}
{pt3dadd(161964.000000,229284.000000,72500.000000,3.264899)}
{pt3dadd(161748.000000,229260.000000,72575.000000,3.479890)}
{pt3dadd(161568.000000,229344.000000,72600.000000,4.799816)}
{pt3dadd(161436.000000,229320.000000,72625.000000,6.449724)}

{create adhoc87}
{access adhoc87}
{connect adhoc87(1), adhoc85(0)}
{nseg = 1}
{strdef color color = "White"}
{pt3dclear()}
{pt3dadd(168756.000000,228468.000000,73475.000000,18.488422)}
{pt3dadd(168504.000000,228804.000000,73500.000000,12.012466)}
{pt3dadd(168228.000000,228972.000000,73425.000000,10.182309)}
{pt3dadd(168516.000000,229272.000000,73675.000000,9.159454)}
{pt3dadd(168480.000000,229488.000000,73800.000000,9.416098)}
{pt3dadd(168312.000000,229776.000000,73750.000000,13.374147)}

{create adhoc88}
{access adhoc88}
{connect adhoc88(1), adhoc87(0)}
{nseg = 1}
{strdef color color = "White"}
{pt3dclear()}
{pt3dadd(168312.000000,229776.000000,73750.000000,13.374147)}
{pt3dadd(168840.000000,229704.000000,74525.000000,7.537939)}
{pt3dadd(168960.000000,229872.000000,74775.000000,5.718558)}
{pt3dadd(169104.000000,229932.000000,74850.000000,3.939524)}
{pt3dadd(169332.000000,229908.000000,74850.000000,3.485983)}
{pt3dadd(169440.000000,229884.000000,74800.000000,4.478975)}

{create adhoc89}
{access adhoc89}
{connect adhoc89(1), adhoc87(0)}
{nseg = 1}
{strdef color color = "White"}
{pt3dclear()}
{pt3dadd(168312.000000,229776.000000,73750.000000,13.374147)}
{pt3dadd(167988.000000,230064.000000,73525.000000,9.416098)}
{pt3dadd(167700.000000,230256.000000,73400.000000,8.624488)}
{pt3dadd(167664.000000,230424.000000,73475.000000,8.178683)}
{pt3dadd(167640.000000,230616.000000,73550.000000,8.673090)}
{pt3dadd(166824.000000,232464.000000,73675.000000,11.145123)}

{create adhoc90}
{access adhoc90}
{connect adhoc90(1), adhoc76(0)}
{nseg = 1}
{strdef color color = "White"}
{pt3dclear()}
{pt3dadd(183156.000000,212112.000000,80875.000000,51.855630)}
{pt3dadd(182784.000000,212172.000000,79850.000000,36.954005)}
{pt3dadd(182376.000000,212328.000000,79750.000000,22.772403)}
{pt3dadd(182040.000000,212268.000000,79300.000000,22.576872)}
{pt3dadd(181752.000000,212208.000000,78850.000000,11.375595)}
{pt3dadd(181488.000000,212436.000000,78700.000000,11.375595)}
{pt3dadd(181152.000000,212604.000000,78700.000000,11.375595)}
{pt3dadd(180864.000000,212664.000000,78400.000000,24.325067)}
{pt3dadd(180516.000000,212748.000000,77975.000000,14.449472)}
{pt3dadd(180192.000000,212760.000000,77600.000000,14.449472)}
{pt3dadd(179904.000000,212964.000000,77225.000000,30.048834)}
{pt3dadd(179592.000000,213204.000000,76950.000000,46.310672)}
{pt3dadd(179244.000000,213360.000000,76375.000000,54.602000)}
{pt3dadd(179004.000000,213516.000000,75700.000000,82.809190)}

{create adhoc91}
{access adhoc91}
{connect adhoc91(1), adhoc90(0)}
{nseg = 1}
{strdef color color = "White"}
{pt3dclear()}
{pt3dadd(179004.000000,213516.000000,75700.000000,82.809190)}
{pt3dadd(178980.000000,212964.000000,78550.000000,29.596055)}
{pt3dadd(178884.000000,212856.000000,78750.000000,18.357633)}
{pt3dadd(178704.000000,212784.000000,78850.000000,2.691590)}
{pt3dadd(178404.000000,212832.000000,79050.000000,2.095795)}
{pt3dadd(177264.000000,213660.000000,79050.000000,2.095795)}
{pt3dadd(177084.000000,213708.000000,78925.000000,3.034142)}
{pt3dadd(176976.000000,213684.000000,78900.000000,4.282076)}
{pt3dadd(176544.000000,213576.000000,78725.000000,5.143801)}
{pt3dadd(176376.000000,213468.000000,78525.000000,7.739669)}

{create adhoc92}
{access adhoc92}
{connect adhoc92(1), adhoc90(0)}
{nseg = 1}
{strdef color color = "White"}
{pt3dclear()}
{pt3dadd(179004.000000,213516.000000,75700.000000,82.809190)}
{pt3dadd(178764.000000,213768.000000,75300.000000,58.629843)}
{pt3dadd(178512.000000,213852.000000,75200.000000,35.777906)}
{pt3dadd(178152.000000,213828.000000,74625.000000,32.179975)}
{pt3dadd(177804.000000,214260.000000,74225.000000,14.163907)}
{pt3dadd(177348.000000,214764.000000,73850.000000,24.905135)}
{pt3dadd(176964.000000,214860.000000,73425.000000,36.815847)}
{pt3dadd(176388.000000,215028.000000,73025.000000,39.253233)}
{pt3dadd(176028.000000,215112.000000,72725.000000,61.053560)}

{create adhoc93}
{access adhoc93}
{connect adhoc93(1), adhoc92(0)}
{nseg = 1}
{strdef color color = "White"}
{pt3dclear()}
{pt3dadd(176028.000000,215112.000000,72725.000000,61.053560)}
{pt3dadd(175740.000000,215376.000000,72550.000000,40.019982)}
{pt3dadd(175440.000000,215568.000000,72200.000000,24.611989)}
{pt3dadd(175104.000000,215700.000000,71900.000000,27.054132)}
{pt3dadd(174744.000000,215760.000000,71525.000000,15.852855)}
{pt3dadd(174408.000000,215928.000000,71225.000000,15.852855)}
{pt3dadd(174072.000000,216084.000000,70925.000000,28.802325)}
{pt3dadd(173580.000000,216576.000000,70575.000000,23.082450)}
{pt3dadd(173412.000000,216624.000000,70525.000000,66.247350)}

{create adhoc94}
{access adhoc94}
{connect adhoc94(1), adhoc93(0)}
{nseg = 1}
{strdef color color = "White"}
{pt3dclear()}
{pt3dadd(173412.000000,216624.000000,70525.000000,66.247350)}
{pt3dadd(172992.000000,216708.000000,69950.000000,64.253799)}
{pt3dadd(172716.000000,216744.000000,69550.000000,57.506386)}

{create adhoc95}
{access adhoc95}
{connect adhoc95(1), adhoc94(0)}
{nseg = 1}
{strdef color color = "White"}
{pt3dclear()}
{pt3dadd(172716.000000,216744.000000,69550.000000,57.506386)}
{pt3dadd(172200.000000,217212.000000,69250.000000,38.837591)}
{pt3dadd(171828.000000,218148.000000,69000.000000,23.902554)}
{pt3dadd(171456.000000,218232.000000,68625.000000,23.902554)}
{pt3dadd(171072.000000,218964.000000,68350.000000,12.701277)}
{pt3dadd(170772.000000,219384.000000,68050.000000,12.701277)}
{pt3dadd(170448.000000,219744.000000,67975.000000,12.701277)}
{pt3dadd(170016.000000,220104.000000,67900.000000,21.985675)}
{pt3dadd(169704.000000,220524.000000,67775.000000,10.784398)}
{pt3dadd(169380.000000,221160.000000,67550.000000,10.784398)}
{pt3dadd(169056.000000,221856.000000,67575.000000,19.685420)}
{pt3dadd(168756.000000,222024.000000,67500.000000,27.372418)}
{pt3dadd(168384.000000,222420.000000,67350.000000,29.146700)}
{pt3dadd(168132.000000,222852.000000,67375.000000,39.934990)}

{create adhoc96}
{access adhoc96}
{connect adhoc96(1), adhoc95(0)}
{nseg = 1}
{strdef color color = "White"}
{pt3dclear()}
{pt3dadd(168132.000000,222852.000000,67375.000000,39.934990)}
{pt3dadd(167856.000000,222720.000000,67350.000000,29.785660)}
{pt3dadd(167556.000000,222876.000000,67350.000000,18.471396)}
{pt3dadd(167232.000000,223044.000000,67250.000000,18.471396)}
{pt3dadd(166896.000000,223056.000000,67025.000000,18.471396)}
{pt3dadd(166560.000000,223584.000000,67025.000000,29.785660)}
{pt3dadd(166200.000000,223548.000000,66925.000000,47.921990)}

{create adhoc97}
{access adhoc97}
{connect adhoc97(1), adhoc96(0)}
{nseg = 1}
{strdef color color = "White"}
{pt3dclear()}
{pt3dadd(166200.000000,223548.000000,66925.000000,47.921990)}
{pt3dadd(165972.000000,223512.000000,66725.000000,31.195630)}
{pt3dadd(165720.000000,223776.000000,66725.000000,19.317378)}
{pt3dadd(165540.000000,224112.000000,66575.000000,17.400499)}
{pt3dadd(165144.000000,224304.000000,66700.000000,16.554517)}
{pt3dadd(164568.000000,224424.000000,66475.000000,26.590861)}
{pt3dadd(164340.000000,224556.000000,66525.000000,39.934990)}

{create adhoc98}
{access adhoc98}
{connect adhoc98(1), adhoc97(0)}
{nseg = 1}
{strdef color color = "White"}
{pt3dclear()}
{pt3dadd(164340.000000,224556.000000,66525.000000,39.934990)}
{pt3dadd(164040.000000,224556.000000,66450.000000,27.123327)}
{pt3dadd(163680.000000,224460.000000,66375.000000,16.873996)}
{pt3dadd(163308.000000,224580.000000,66400.000000,15.542830)}
{pt3dadd(162996.000000,224556.000000,66325.000000,7.855832)}
{pt3dadd(162648.000000,224712.000000,66400.000000,7.855832)}
{pt3dadd(162360.000000,224808.000000,66350.000000,7.855832)}
{pt3dadd(162036.000000,224736.000000,66300.000000,14.211664)}
{pt3dadd(161748.000000,224592.000000,66225.000000,7.855832)}
{pt3dadd(161472.000000,224604.000000,66100.000000,7.855832)}
{pt3dadd(161184.000000,224868.000000,65975.000000,7.855832)}
{pt3dadd(160800.000000,224964.000000,65825.000000,14.211664)}
{pt3dadd(160500.000000,225048.000000,65750.000000,7.855832)}
{pt3dadd(160224.000000,225072.000000,65675.000000,7.855832)}
{pt3dadd(159948.000000,225096.000000,65600.000000,7.855832)}
{pt3dadd(159696.000000,225036.000000,65525.000000,14.211664)}
{pt3dadd(159396.000000,224976.000000,65450.000000,7.855832)}
{pt3dadd(159108.000000,224868.000000,65250.000000,7.855832)}
{pt3dadd(158808.000000,224832.000000,65050.000000,7.855832)}
{pt3dadd(158544.000000,224832.000000,64875.000000,13.945430)}
{pt3dadd(158232.000000,224700.000000,64775.000000,7.589598)}
{pt3dadd(157932.000000,224700.000000,64675.000000,7.589598)}
{pt3dadd(157680.000000,224676.000000,64475.000000,7.589598)}
{pt3dadd(157416.000000,224604.000000,64450.000000,12.836125)}
{pt3dadd(157116.000000,224364.000000,64375.000000,6.746526)}
{pt3dadd(156840.000000,224256.000000,64275.000000,6.746526)}
{pt3dadd(156588.000000,224124.000000,64275.000000,6.746526)}
{pt3dadd(156300.000000,223980.000000,64075.000000,13.102358)}
{pt3dadd(155976.000000,223776.000000,63925.000000,7.855832)}
{pt3dadd(155664.000000,223572.000000,63925.000000,7.855832)}
{pt3dadd(155376.000000,223536.000000,63850.000000,14.211664)}
{pt3dadd(154980.000000,223332.000000,63725.000000,20.567496)}
{pt3dadd(154656.000000,222984.000000,63500.000000,22.686107)}
{pt3dadd(154524.000000,222708.000000,63400.000000,33.279160)}

{create adhoc99}
{access adhoc99}
{connect adhoc99(1), adhoc98(0)}
{nseg = 1}
{strdef color color = "White"}
{pt3dclear()}
{pt3dadd(154524.000000,222708.000000,63400.000000,33.279160)}
{pt3dadd(154248.000000,222456.000000,63000.000000,24.904717)}
{pt3dadd(154092.000000,222216.000000,62850.000000,15.542830)}
{pt3dadd(154212.000000,221844.000000,62875.000000,14.433524)}
{pt3dadd(153972.000000,221508.000000,62575.000000,6.746526)}
{pt3dadd(153756.000000,221172.000000,62375.000000,6.746526)}
{pt3dadd(153516.000000,220848.000000,62225.000000,6.746526)}
{pt3dadd(153372.000000,220512.000000,61925.000000,14.433524)}
{pt3dadd(153372.000000,220176.000000,61625.000000,9.186998)}
{pt3dadd(153372.000000,219852.000000,61425.000000,9.186998)}
{pt3dadd(153132.000000,219516.000000,61275.000000,15.276596)}
{pt3dadd(152964.000000,219192.000000,61000.000000,21.632428)}
{pt3dadd(152796.000000,218868.000000,60850.000000,22.242384)}
{pt3dadd(152628.000000,218544.000000,60675.000000,33.279160)}

{create adhoc100}
{access adhoc100}
{connect adhoc100(1), adhoc99(0)}
{nseg = 1}
{strdef color color = "White"}
{pt3dclear()}
{pt3dadd(152628.000000,218544.000000,60675.000000,33.279160)}
{pt3dadd(152820.000000,218280.000000,60675.000000,22.686107)}
{pt3dadd(152880.000000,218052.000000,60600.000000,14.211664)}
{pt3dadd(152928.000000,217788.000000,60500.000000,14.211664)}
{pt3dadd(152940.000000,217488.000000,60375.000000,7.855832)}
{pt3dadd(153036.000000,217188.000000,60225.000000,7.855832)}
{pt3dadd(153132.000000,216912.000000,60200.000000,7.855832)}
{pt3dadd(153156.000000,216612.000000,60075.000000,15.223351)}
{pt3dadd(153132.000000,216288.000000,60000.000000,8.867519)}
{pt3dadd(153096.000000,215964.000000,59875.000000,8.867519)}
{pt3dadd(153252.000000,215700.000000,59725.000000,8.867519)}
{pt3dadd(153336.000000,215472.000000,59650.000000,14.957117)}
{pt3dadd(153300.000000,215172.000000,59500.000000,7.589598)}
{pt3dadd(153360.000000,214920.000000,59450.000000,7.589598)}
{pt3dadd(153456.000000,214656.000000,59375.000000,7.589598)}
{pt3dadd(153468.000000,214392.000000,59275.000000,13.945430)}
{pt3dadd(153480.000000,214164.000000,59200.000000,7.855832)}
{pt3dadd(153564.000000,213960.000000,59175.000000,7.855832)}
{pt3dadd(153564.000000,213768.000000,59225.000000,7.855832)}
{pt3dadd(153576.000000,213384.000000,59025.000000,14.211664)}
{pt3dadd(153576.000000,213060.000000,58975.000000,7.855832)}
{pt3dadd(153576.000000,212760.000000,58950.000000,7.855832)}
{pt3dadd(153600.000000,212448.000000,58850.000000,7.855832)}
{pt3dadd(153624.000000,211932.000000,58775.000000,14.211664)}
{pt3dadd(153672.000000,211536.000000,58725.000000,7.855832)}
{pt3dadd(153612.000000,211140.000000,58675.000000,7.855832)}
{pt3dadd(153636.000000,210852.000000,58725.000000,7.855832)}
{pt3dadd(153660.000000,210588.000000,58725.000000,14.211664)}
{pt3dadd(153684.000000,210276.000000,58650.000000,7.855832)}
{pt3dadd(153660.000000,209844.000000,58600.000000,7.855832)}
{pt3dadd(153828.000000,209484.000000,58450.000000,7.855832)}
{pt3dadd(154128.000000,209076.000000,58475.000000,15.542830)}
{pt3dadd(154140.000000,208692.000000,58400.000000,9.186998)}
{pt3dadd(154200.000000,208248.000000,58300.000000,9.186998)}
{pt3dadd(154260.000000,207972.000000,58200.000000,9.186998)}
{pt3dadd(154320.000000,207660.000000,58150.000000,15.542830)}
{pt3dadd(154440.000000,207336.000000,58050.000000,7.855832)}
{pt3dadd(154560.000000,207000.000000,57925.000000,13.102358)}
{pt3dadd(154680.000000,206616.000000,57775.000000,20.789356)}
{pt3dadd(154656.000000,206292.000000,57650.000000,23.055874)}
{pt3dadd(154968.000000,205896.000000,57625.000000,39.934990)}

{create adhoc101}
{access adhoc101}
{connect adhoc101(1), adhoc100(0)}
{nseg = 1}
{strdef color color = "White"}
{pt3dclear()}
{pt3dadd(154968.000000,205896.000000,57625.000000,39.934990)}
{pt3dadd(155100.000000,205620.000000,57625.000000,24.904717)}
{pt3dadd(155304.000000,205248.000000,57625.000000,21.632428)}
{pt3dadd(155472.000000,204900.000000,57600.000000,20.301262)}
{pt3dadd(155484.000000,204444.000000,57475.000000,22.242384)}
{pt3dadd(155544.000000,204288.000000,57550.000000,33.279160)}

{create adhoc102}
{access adhoc102}
{connect adhoc102(1), adhoc101(0)}
{nseg = 1}
{strdef color color = "White"}
{pt3dclear()}
{pt3dadd(155544.000000,204288.000000,57550.000000,33.279160)}
{pt3dadd(154620.000000,204312.000000,57375.000000,14.172943)}
{pt3dadd(153516.000000,204312.000000,57550.000000,9.103766)}
{pt3dadd(152592.000000,204168.000000,57750.000000,4.676958)}
{pt3dadd(151044.000000,203928.000000,57950.000000,3.429025)}
{pt3dadd(150792.000000,203892.000000,58075.000000,3.429025)}
{pt3dadd(150588.000000,203832.000000,58125.000000,3.429025)}
{pt3dadd(150324.000000,203832.000000,58200.000000,5.268888)}
{pt3dadd(150168.000000,203424.000000,58575.000000,3.339864)}
{pt3dadd(150300.000000,202404.000000,58550.000000,3.339864)}
{pt3dadd(150360.000000,202164.000000,58300.000000,3.339864)}
{pt3dadd(150408.000000,201948.000000,58325.000000,4.114818)}
{pt3dadd(150528.000000,201804.000000,58250.000000,2.274954)}
{pt3dadd(150612.000000,201564.000000,58075.000000,2.274954)}
{pt3dadd(150840.000000,201372.000000,58200.000000,2.274954)}
{pt3dadd(150900.000000,201132.000000,58100.000000,3.264899)}
{pt3dadd(150996.000000,200880.000000,58100.000000,2.489945)}
{pt3dadd(151056.000000,200592.000000,58400.000000,2.489945)}
{pt3dadd(150876.000000,200460.000000,58850.000000,2.489945)}
{pt3dadd(150468.000000,200460.000000,59025.000000,4.047465)}
{pt3dadd(149736.000000,200592.000000,59500.000000,3.057520)}
{pt3dadd(149184.000000,200640.000000,59900.000000,3.057520)}
{pt3dadd(148152.000000,200640.000000,60575.000000,3.057520)}
{pt3dadd(147936.000000,200652.000000,60950.000000,3.653315)}
{pt3dadd(147276.000000,201000.000000,61450.000000,2.542291)}
{pt3dadd(146844.000000,201168.000000,61975.000000,3.237152)}
{pt3dadd(146736.000000,201144.000000,62250.000000,3.732480)}

{create adhoc103}
{access adhoc103}
{connect adhoc103(1), adhoc101(0)}
{nseg = 1}
{strdef color color = "White"}
{pt3dclear()}
{pt3dadd(155544.000000,204288.000000,57550.000000,33.279160)}
{pt3dadd(155472.000000,204072.000000,57500.000000,22.686107)}
{pt3dadd(155568.000000,203832.000000,57450.000000,25.814022)}
{pt3dadd(155592.000000,203604.000000,57500.000000,20.837264)}
{pt3dadd(155640.000000,203436.000000,57275.000000,27.732632)}

{create adhoc104}
{access adhoc104}
{connect adhoc104(1), adhoc103(0)}
{nseg = 1}
{strdef color color = "White"}
{pt3dclear()}
{pt3dadd(155640.000000,203436.000000,57275.000000,27.732632)}
{pt3dadd(154992.000000,203364.000000,58800.000000,14.202260)}
{pt3dadd(154752.000000,203160.000000,59075.000000,9.121356)}
{pt3dadd(154764.000000,202956.000000,59150.000000,6.249659)}
{pt3dadd(154848.000000,202632.000000,59200.000000,3.874829)}
{pt3dadd(154824.000000,202260.000000,59375.000000,3.874829)}
{pt3dadd(154944.000000,201936.000000,59500.000000,3.874829)}
{pt3dadd(154944.000000,201672.000000,59700.000000,6.784625)}
{pt3dadd(155028.000000,201360.000000,59725.000000,4.409795)}
{pt3dadd(155076.000000,201036.000000,59950.000000,4.409795)}
{pt3dadd(155340.000000,200748.000000,59975.000000,4.409795)}
{pt3dadd(155496.000000,200532.000000,60125.000000,7.319591)}
{pt3dadd(155616.000000,200316.000000,60150.000000,4.409795)}
{pt3dadd(155844.000000,200040.000000,60250.000000,4.409795)}
{pt3dadd(155976.000000,199800.000000,60425.000000,4.409795)}
{pt3dadd(156276.000000,199548.000000,60500.000000,7.319591)}
{pt3dadd(156516.000000,199260.000000,60525.000000,4.409795)}
{pt3dadd(156720.000000,198948.000000,60525.000000,4.409795)}
{pt3dadd(156876.000000,198624.000000,60600.000000,4.409795)}
{pt3dadd(157140.000000,198312.000000,60625.000000,7.067943)}
{pt3dadd(157164.000000,197988.000000,60475.000000,4.158147)}
{pt3dadd(157260.000000,197688.000000,60400.000000,4.158147)}
{pt3dadd(157308.000000,197412.000000,60250.000000,4.158147)}
{pt3dadd(157428.000000,197100.000000,60225.000000,7.067943)}
{pt3dadd(157704.000000,196140.000000,60250.000000,4.409795)}
{pt3dadd(157812.000000,195804.000000,60075.000000,4.409795)}
{pt3dadd(157872.000000,195552.000000,59950.000000,4.409795)}
{pt3dadd(157860.000000,195300.000000,59900.000000,6.784625)}
{pt3dadd(157824.000000,195024.000000,59725.000000,3.874829)}
{pt3dadd(157872.000000,194772.000000,59550.000000,3.874829)}
{pt3dadd(157968.000000,194496.000000,59250.000000,5.803854)}
{pt3dadd(158100.000000,194220.000000,59175.000000,7.732879)}
{pt3dadd(158328.000000,193956.000000,58950.000000,7.930082)}
{pt3dadd(158256.000000,193680.000000,58950.000000,11.145123)}

{create adhoc105}
{access adhoc105}
{connect adhoc105(1), adhoc104(0)}
{nseg = 1}
{strdef color color = "White"}
{pt3dclear()}
{pt3dadd(158256.000000,193680.000000,58950.000000,11.145123)}
{pt3dadd(157860.000000,193392.000000,59350.000000,7.310908)}
{pt3dadd(157788.000000,193368.000000,59600.000000,5.433041)}
{pt3dadd(157644.000000,193236.000000,59950.000000,3.950512)}
{pt3dadd(157476.000000,193692.000000,60375.000000,2.988320)}
{pt3dadd(157512.000000,193776.000000,60700.000000,3.732480)}

{create adhoc106}
{access adhoc106}
{connect adhoc106(1), adhoc104(0)}
{nseg = 1}
{strdef color color = "White"}
{pt3dclear()}
{pt3dadd(158256.000000,193680.000000,58950.000000,11.145123)}
{pt3dadd(158592.000000,193452.000000,58525.000000,7.930082)}
{pt3dadd(158724.000000,193212.000000,58375.000000,5.358049)}
{pt3dadd(158748.000000,192972.000000,58225.000000,6.338820)}
{pt3dadd(158808.000000,192696.000000,58125.000000,4.409795)}
{pt3dadd(159012.000000,192420.000000,58025.000000,4.409795)}
{pt3dadd(159180.000000,192168.000000,57950.000000,5.967316)}
{pt3dadd(159336.000000,191904.000000,57900.000000,7.524836)}
{pt3dadd(159504.000000,191736.000000,57900.000000,6.691735)}
{pt3dadd(159768.000000,191592.000000,57675.000000,9.287602)}

{create adhoc107}
{access adhoc107}
{connect adhoc107(1), adhoc106(0)}
{nseg = 1}
{strdef color color = "White"}
{pt3dclear()}
{pt3dadd(159768.000000,191592.000000,57675.000000,9.287602)}
{pt3dadd(160788.000000,192084.000000,57675.000000,6.175757)}
{pt3dadd(161088.000000,192516.000000,57550.000000,5.526904)}
{pt3dadd(161160.000000,192600.000000,57250.000000,3.535750)}
{pt3dadd(161280.000000,192504.000000,57075.000000,3.732480)}

{create adhoc108}
{access adhoc108}
{connect adhoc108(1), adhoc106(0)}
{nseg = 1}
{strdef color color = "White"}
{pt3dclear()}
{pt3dadd(159768.000000,191592.000000,57675.000000,9.287602)}
{pt3dadd(159828.000000,190404.000000,57450.000000,6.691735)}
{pt3dadd(160020.000000,189324.000000,57050.000000,7.110908)}
{pt3dadd(159888.000000,188916.000000,56675.000000,5.659779)}
{pt3dadd(159708.000000,188400.000000,56225.000000,7.739669)}

{create adhoc109}
{access adhoc109}
{connect adhoc109(1), adhoc108(0)}
{nseg = 1}
{strdef color color = "White"}
{pt3dclear()}
{pt3dadd(159708.000000,188400.000000,56225.000000,7.739669)}
{pt3dadd(158748.000000,188160.000000,56425.000000,6.521388)}
{pt3dadd(158376.000000,188316.000000,56825.000000,6.091406)}
{pt3dadd(158340.000000,188052.000000,57075.000000,6.449724)}

{create adhoc110}
{access adhoc110}
{connect adhoc110(1), adhoc108(0)}
{nseg = 1}
{strdef color color = "White"}
{pt3dclear()}
{pt3dadd(159708.000000,188400.000000,56225.000000,7.739669)}
{pt3dadd(159516.000000,187932.000000,55650.000000,4.478975)}

{create adhoc111}
{access adhoc111}
{connect adhoc111(1), adhoc103(0)}
{nseg = 1}
{strdef color color = "White"}
{pt3dclear()}
{pt3dadd(155640.000000,203436.000000,57275.000000,27.732632)}
{pt3dadd(155868.000000,203232.000000,56875.000000,19.267522)}
{pt3dadd(156228.000000,202680.000000,56675.000000,12.160513)}
{pt3dadd(156324.000000,202404.000000,56575.000000,12.160513)}
{pt3dadd(156348.000000,202116.000000,56475.000000,6.913987)}
{pt3dadd(156396.000000,201852.000000,56275.000000,6.746526)}
{pt3dadd(156552.000000,201516.000000,56125.000000,6.746526)}
{pt3dadd(156672.000000,201228.000000,56050.000000,13.102358)}
{pt3dadd(156684.000000,201000.000000,55950.000000,7.855832)}
{pt3dadd(156768.000000,200796.000000,55875.000000,7.855832)}
{pt3dadd(156792.000000,200508.000000,55600.000000,7.855832)}
{pt3dadd(156816.000000,200220.000000,55325.000000,12.880497)}
{pt3dadd(156972.000000,199944.000000,55100.000000,6.524665)}
{pt3dadd(157020.000000,199608.000000,54975.000000,6.524665)}
{pt3dadd(156696.000000,199320.000000,54575.000000,6.524665)}
{pt3dadd(156528.000000,198984.000000,54200.000000,12.614264)}
{pt3dadd(156216.000000,198612.000000,53650.000000,11.141353)}
{pt3dadd(156000.000000,198252.000000,53050.000000,14.051149)}
{pt3dadd(155604.000000,198000.000000,52450.000000,22.418581)}
{pt3dadd(155628.000000,197760.000000,51975.000000,16.048977)}

{create adhoc112}
{access adhoc112}
{connect adhoc112(1), adhoc111(0)}
{nseg = 1}
{strdef color color = "White"}
{pt3dclear()}
{pt3dadd(155628.000000,197760.000000,51975.000000,16.048977)}
{pt3dadd(156312.000000,196536.000000,51950.000000,8.932839)}
{pt3dadd(156324.000000,196320.000000,51875.000000,4.827340)}
{pt3dadd(156336.000000,196044.000000,51800.000000,3.732480)}

{create adhoc113}
{access adhoc113}
{connect adhoc113(1), adhoc111(0)}
{nseg = 1}
{strdef color color = "White"}
{pt3dclear()}
{pt3dadd(155628.000000,197760.000000,51975.000000,16.048977)}
{pt3dadd(155592.000000,197592.000000,51575.000000,17.932057)}
{pt3dadd(155688.000000,197316.000000,51000.000000,20.285907)}
{pt3dadd(155916.000000,196764.000000,50500.000000,23.110527)}

{create adhoc114}
{access adhoc114}
{connect adhoc114(1), adhoc113(0)}
{nseg = 1}
{strdef color color = "White"}
{pt3dclear()}
{pt3dadd(155916.000000,196764.000000,50500.000000,23.110527)}
{pt3dadd(156192.000000,195540.000000,50475.000000,13.553168)}
{pt3dadd(155868.000000,193212.000000,50475.000000,8.731901)}
{pt3dadd(155928.000000,193020.000000,50475.000000,7.319591)}
{pt3dadd(155784.000000,192756.000000,50425.000000,4.409795)}
{pt3dadd(155844.000000,192468.000000,50450.000000,4.409795)}
{pt3dadd(155784.000000,192168.000000,50500.000000,4.409795)}
{pt3dadd(155760.000000,192036.000000,50500.000000,6.677632)}
{pt3dadd(155736.000000,191784.000000,50500.000000,3.767836)}
{pt3dadd(155604.000000,191484.000000,50500.000000,3.767836)}
{pt3dadd(155628.000000,191184.000000,50500.000000,3.767836)}
{pt3dadd(155520.000000,190860.000000,50400.000000,5.696861)}
{pt3dadd(155484.000000,190584.000000,50350.000000,3.429025)}
{pt3dadd(155484.000000,190332.000000,50275.000000,3.429025)}
{pt3dadd(155448.000000,190020.000000,50150.000000,3.429025)}
{pt3dadd(155616.000000,189696.000000,50450.000000,5.358049)}
{pt3dadd(156012.000000,188244.000000,50525.000000,3.429025)}
{pt3dadd(156252.000000,187920.000000,50775.000000,3.429025)}
{pt3dadd(156372.000000,187596.000000,50900.000000,3.429025)}
{pt3dadd(156804.000000,187332.000000,50900.000000,4.986545)}
{pt3dadd(157104.000000,186792.000000,50550.000000,4.986545)}
{pt3dadd(157260.000000,186132.000000,50250.000000,5.433041)}
{pt3dadd(157152.000000,185508.000000,49825.000000,8.055068)}
{pt3dadd(157416.000000,184632.000000,49525.000000,3.732480)}

{create adhoc115}
{access adhoc115}
{connect adhoc115(1), adhoc113(0)}
{nseg = 1}
{strdef color color = "White"}
{pt3dclear()}
{pt3dadd(155916.000000,196764.000000,50500.000000,23.110527)}
{pt3dadd(155652.000000,196596.000000,49925.000000,12.661558)}
{pt3dadd(155436.000000,196200.000000,49475.000000,8.196935)}
{pt3dadd(155436.000000,195912.000000,49025.000000,5.432350)}
{pt3dadd(155400.000000,195588.000000,48575.000000,3.057520)}
{pt3dadd(155568.000000,195072.000000,48125.000000,3.057520)}
{pt3dadd(155424.000000,195072.000000,47675.000000,3.057520)}
{pt3dadd(155436.000000,194928.000000,47275.000000,4.729619)}
{pt3dadd(155592.000000,194820.000000,46900.000000,3.172098)}
{pt3dadd(155784.000000,194724.000000,46475.000000,3.172098)}
{pt3dadd(155904.000000,194328.000000,46000.000000,3.172098)}
{pt3dadd(156036.000000,194016.000000,45550.000000,4.729619)}
{pt3dadd(156264.000000,193944.000000,45100.000000,3.057520)}
{pt3dadd(156576.000000,193512.000000,44700.000000,3.057520)}
{pt3dadd(156696.000000,193140.000000,44300.000000,3.057520)}
{pt3dadd(156948.000000,192360.000000,43875.000000,4.986545)}
{pt3dadd(157380.000000,191292.000000,43475.000000,3.429025)}
{pt3dadd(157728.000000,190152.000000,43325.000000,3.429025)}
{pt3dadd(157848.000000,189864.000000,43050.000000,3.429025)}
{pt3dadd(157788.000000,189612.000000,43025.000000,4.986545)}
{pt3dadd(157752.000000,189324.000000,42950.000000,4.540740)}
{pt3dadd(157752.000000,189012.000000,42900.000000,5.530685)}
{pt3dadd(157752.000000,188712.000000,42775.000000,8.217808)}
{pt3dadd(157644.000000,188532.000000,42900.000000,6.449724)}

{create adhoc116}
{access adhoc116}
{connect adhoc116(1), adhoc100(0)}
{nseg = 1}
{strdef color color = "White"}
{pt3dclear()}
{pt3dadd(154968.000000,205896.000000,57625.000000,39.934990)}
{pt3dadd(154260.000000,206772.000000,57250.000000,17.098494)}
{pt3dadd(154020.000000,206028.000000,56950.000000,10.859096)}
{pt3dadd(153768.000000,205788.000000,56700.000000,4.420032)}
{pt3dadd(153552.000000,205572.000000,56500.000000,2.747934)}
{pt3dadd(153336.000000,205428.000000,56425.000000,2.747934)}
{pt3dadd(153132.000000,205212.000000,56425.000000,2.747934)}
{pt3dadd(152616.000000,204864.000000,56050.000000,4.305454)}
{pt3dadd(152436.000000,204516.000000,55700.000000,3.057520)}
{pt3dadd(152424.000000,204384.000000,55550.000000,3.057520)}
{pt3dadd(152436.000000,204168.000000,55475.000000,3.057520)}
{pt3dadd(152484.000000,203904.000000,55325.000000,4.615041)}
{pt3dadd(152688.000000,203724.000000,55175.000000,3.057520)}
{pt3dadd(152748.000000,203520.000000,54975.000000,3.057520)}
{pt3dadd(152796.000000,203352.000000,54850.000000,3.057520)}
{pt3dadd(152796.000000,203124.000000,54675.000000,4.615041)}
{pt3dadd(152820.000000,202860.000000,54300.000000,3.057520)}
{pt3dadd(152640.000000,202620.000000,53725.000000,3.057520)}
{pt3dadd(152604.000000,202416.000000,53525.000000,3.057520)}
{pt3dadd(152652.000000,202236.000000,53250.000000,4.615041)}
{pt3dadd(152556.000000,201996.000000,52775.000000,4.047465)}
{pt3dadd(152748.000000,202008.000000,52325.000000,5.745775)}
{pt3dadd(152880.000000,202008.000000,52000.000000,6.449724)}

{create adhoc117}
{access adhoc117}
{connect adhoc117(1), adhoc99(0)}
{nseg = 1}
{strdef color color = "White"}
{pt3dclear()}
{pt3dadd(152628.000000,218544.000000,60675.000000,33.279160)}
{pt3dadd(152124.000000,218472.000000,59175.000000,15.379483)}
{pt3dadd(152028.000000,218160.000000,58750.000000,9.827690)}
{pt3dadd(151896.000000,217944.000000,58475.000000,7.023612)}
{pt3dadd(151932.000000,217704.000000,58125.000000,5.051754)}
{pt3dadd(151896.000000,217668.000000,57750.000000,5.051754)}
{pt3dadd(151836.000000,217272.000000,57350.000000,5.051754)}
{pt3dadd(151788.000000,216624.000000,56925.000000,7.961550)}
{pt3dadd(151776.000000,216072.000000,56475.000000,4.409795)}
{pt3dadd(151752.000000,215928.000000,56400.000000,4.409795)}
{pt3dadd(151776.000000,215700.000000,56350.000000,4.409795)}
{pt3dadd(151788.000000,215472.000000,56200.000000,7.191199)}
{pt3dadd(151872.000000,215292.000000,56050.000000,4.281404)}
{pt3dadd(151728.000000,215040.000000,55950.000000,4.281404)}
{pt3dadd(151788.000000,214800.000000,55850.000000,4.281404)}
{pt3dadd(151992.000000,214572.000000,55625.000000,7.191199)}
{pt3dadd(152076.000000,214356.000000,55450.000000,4.409795)}
{pt3dadd(152160.000000,214176.000000,55375.000000,4.409795)}
{pt3dadd(152292.000000,213744.000000,55025.000000,4.409795)}
{pt3dadd(152412.000000,213300.000000,54575.000000,6.249659)}
{pt3dadd(152712.000000,212940.000000,54175.000000,3.339864)}
{pt3dadd(152820.000000,212496.000000,53550.000000,3.339864)}
{pt3dadd(153012.000000,211884.000000,53150.000000,3.339864)}
{pt3dadd(152976.000000,211596.000000,52725.000000,4.587797)}
{pt3dadd(153180.000000,211308.000000,52325.000000,2.747934)}
{pt3dadd(153516.000000,210276.000000,51925.000000,2.747934)}
{pt3dadd(153576.000000,210084.000000,51825.000000,2.747934)}
{pt3dadd(153696.000000,209916.000000,51700.000000,5.122763)}
{pt3dadd(154524.000000,207912.000000,51575.000000,3.874829)}
{pt3dadd(154716.000000,207696.000000,51600.000000,3.874829)}
{pt3dadd(154872.000000,207456.000000,51650.000000,3.874829)}
{pt3dadd(154932.000000,207276.000000,51700.000000,6.142666)}
{pt3dadd(154992.000000,207012.000000,51650.000000,3.767836)}
{pt3dadd(154932.000000,206808.000000,51675.000000,3.767836)}
{pt3dadd(154932.000000,206508.000000,51550.000000,3.767836)}
{pt3dadd(155232.000000,206280.000000,51400.000000,8.178759)}
{pt3dadd(155256.000000,206016.000000,51750.000000,5.910923)}
{pt3dadd(155460.000000,205584.000000,52400.000000,5.910923)}
{pt3dadd(155304.000000,205272.000000,53100.000000,5.910923)}
{pt3dadd(154872.000000,205092.000000,53750.000000,10.233028)}
{pt3dadd(154800.000000,204696.000000,54575.000000,5.822105)}
{pt3dadd(154956.000000,204384.000000,55175.000000,10.144211)}
{pt3dadd(154860.000000,204024.000000,55825.000000,14.466316)}
{pt3dadd(154764.000000,203652.000000,56375.000000,15.907018)}
{pt3dadd(154968.000000,203280.000000,56950.000000,23.110527)}

{create adhoc118}
{access adhoc118}
{connect adhoc118(1), adhoc98(0)}
{nseg = 1}
{strdef color color = "White"}
{pt3dclear()}
{pt3dadd(154524.000000,222708.000000,63400.000000,33.279160)}
{pt3dadd(154500.000000,224700.000000,64425.000000,16.051102)}
{pt3dadd(154152.000000,225192.000000,64550.000000,10.230661)}
{pt3dadd(153828.000000,225720.000000,64800.000000,6.532977)}
{pt3dadd(153636.000000,225888.000000,64800.000000,7.709902)}
{pt3dadd(153360.000000,226224.000000,64900.000000,11.849837)}
{pt3dadd(153084.000000,226392.000000,64950.000000,19.258772)}

{create adhoc119}
{access adhoc119}
{connect adhoc119(1), adhoc118(0)}
{nseg = 1}
{strdef color color = "White"}
{pt3dclear()}
{pt3dadd(153084.000000,226392.000000,64950.000000,19.258772)}
{pt3dadd(152880.000000,226140.000000,64875.000000,13.339181)}
{pt3dadd(152640.000000,226224.000000,65150.000000,8.603509)}
{pt3dadd(152424.000000,226176.000000,65075.000000,6.891618)}
{pt3dadd(152208.000000,226140.000000,64925.000000,3.339864)}
{pt3dadd(151896.000000,226104.000000,64850.000000,3.339864)}
{pt3dadd(151668.000000,226080.000000,64800.000000,3.339864)}
{pt3dadd(151440.000000,226044.000000,64800.000000,5.268888)}
{pt3dadd(151116.000000,226236.000000,64900.000000,3.429025)}
{pt3dadd(150852.000000,226296.000000,64825.000000,3.429025)}
{pt3dadd(150612.000000,226296.000000,64775.000000,3.429025)}
{pt3dadd(150420.000000,226320.000000,64700.000000,5.358049)}
{pt3dadd(150180.000000,226296.000000,64475.000000,3.429025)}
{pt3dadd(150000.000000,226128.000000,64350.000000,3.429025)}
{pt3dadd(149892.000000,226032.000000,63900.000000,3.429025)}
{pt3dadd(149832.000000,226092.000000,63375.000000,5.358049)}
{pt3dadd(149580.000000,226188.000000,62625.000000,3.429025)}
{pt3dadd(149484.000000,226248.000000,62050.000000,3.429025)}
{pt3dadd(149484.000000,226332.000000,61625.000000,3.429025)}
{pt3dadd(149580.000000,226296.000000,60650.000000,4.986545)}
{pt3dadd(149664.000000,226320.000000,60350.000000,3.057520)}
{pt3dadd(149724.000000,226380.000000,59950.000000,3.057520)}
{pt3dadd(149988.000000,226512.000000,59450.000000,4.305454)}
{pt3dadd(149928.000000,226476.000000,59100.000000,4.865417)}
{pt3dadd(150324.000000,226644.000000,58675.000000,4.513162)}
{pt3dadd(151044.000000,226704.000000,58250.000000,4.299816)}

{create adhoc120}
{access adhoc120}
{connect adhoc120(1), adhoc118(0)}
{nseg = 1}
{strdef color color = "White"}
{pt3dclear()}
{pt3dadd(153084.000000,226392.000000,64950.000000,19.258772)}
{pt3dadd(153168.000000,227940.000000,65000.000000,10.015458)}
{pt3dadd(152484.000000,229476.000000,65000.000000,6.609275)}
{pt3dadd(152376.000000,229716.000000,64900.000000,5.967316)}
{pt3dadd(152028.000000,229944.000000,64825.000000,4.409795)}
{pt3dadd(151080.000000,231420.000000,64575.000000,4.409795)}
{pt3dadd(150888.000000,231696.000000,64475.000000,4.409795)}
{pt3dadd(150900.000000,231888.000000,64525.000000,5.967316)}
{pt3dadd(150612.000000,232044.000000,63875.000000,3.057520)}
{pt3dadd(150096.000000,232620.000000,63400.000000,4.047465)}
{pt3dadd(150120.000000,232860.000000,62800.000000,5.037410)}
{pt3dadd(149844.000000,233028.000000,62425.000000,4.799816)}
{pt3dadd(149568.000000,233172.000000,62350.000000,6.449724)}

{create adhoc121}
{access adhoc121}
{connect adhoc121(1), adhoc97(0)}
{nseg = 1}
{strdef color color = "White"}
{pt3dclear()}
{pt3dadd(164340.000000,224556.000000,66525.000000,39.934990)}
{pt3dadd(164208.000000,226800.000000,66100.000000,18.091391)}
{pt3dadd(163968.000000,227340.000000,66000.000000,15.006589)}
{pt3dadd(163872.000000,227700.000000,66100.000000,10.100994)}
{pt3dadd(163776.000000,228024.000000,66100.000000,12.055263)}
{pt3dadd(163944.000000,228108.000000,66050.000000,15.407018)}

{create adhoc122}
{access adhoc122}
{connect adhoc122(1), adhoc121(0)}
{nseg = 1}
{strdef color color = "White"}
{pt3dclear()}
{pt3dadd(163944.000000,228108.000000,66050.000000,15.407018)}
{pt3dadd(163356.000000,228444.000000,66175.000000,10.771346)}
{pt3dadd(163116.000000,228816.000000,66325.000000,7.062808)}
{pt3dadd(162876.000000,229212.000000,66200.000000,7.833159)}
{pt3dadd(162480.000000,229584.000000,66275.000000,6.891618)}
{pt3dadd(162012.000000,230004.000000,66225.000000,10.486030)}
{pt3dadd(161544.000000,230256.000000,66350.000000,10.699318)}

{create adhoc123}
{access adhoc123}
{connect adhoc123(1), adhoc122(0)}
{nseg = 1}
{strdef color color = "White"}
{pt3dclear()}
{pt3dadd(161544.000000,230256.000000,66350.000000,10.699318)}
{pt3dadd(161892.000000,230520.000000,66400.000000,7.162307)}
{pt3dadd(161832.000000,230796.000000,66375.000000,4.897384)}
{pt3dadd(161772.000000,231108.000000,66375.000000,5.432350)}
{pt3dadd(161712.000000,231480.000000,66425.000000,3.874829)}
{pt3dadd(161808.000000,232272.000000,65400.000000,3.874829)}
{pt3dadd(161676.000000,232476.000000,65075.000000,3.874829)}
{pt3dadd(161988.000000,232632.000000,64650.000000,6.249659)}
{pt3dadd(162036.000000,232872.000000,64100.000000,6.249659)}
{pt3dadd(162120.000000,233004.000000,63650.000000,7.497593)}
{pt3dadd(162132.000000,233016.000000,63350.000000,11.495988)}
{pt3dadd(162108.000000,233076.000000,63150.000000,7.739669)}

{create adhoc124}
{access adhoc124}
{connect adhoc124(1), adhoc122(0)}
{nseg = 1}
{strdef color color = "White"}
{pt3dclear()}
{pt3dadd(161544.000000,230256.000000,66350.000000,10.699318)}
{pt3dadd(160368.000000,230424.000000,66525.000000,8.524488)}
{pt3dadd(160080.000000,230436.000000,66850.000000,5.714693)}
{pt3dadd(159564.000000,230700.000000,67225.000000,5.060846)}
{pt3dadd(159072.000000,230928.000000,67600.000000,2.686016)}
{pt3dadd(158856.000000,231012.000000,67675.000000,2.686016)}
{pt3dadd(158616.000000,231108.000000,68000.000000,2.686016)}
{pt3dadd(158424.000000,231204.000000,68050.000000,3.933950)}
{pt3dadd(158124.000000,231228.000000,68225.000000,2.747934)}
{pt3dadd(157908.000000,231360.000000,68275.000000,2.747934)}
{pt3dadd(157656.000000,231528.000000,68475.000000,2.747934)}
{pt3dadd(157404.000000,231588.000000,68525.000000,4.420032)}
{pt3dadd(157176.000000,231756.000000,68650.000000,3.172098)}
{pt3dadd(156900.000000,231804.000000,68800.000000,3.172098)}
{pt3dadd(156612.000000,231936.000000,68925.000000,3.172098)}
{pt3dadd(156420.000000,232056.000000,68975.000000,4.729619)}
{pt3dadd(156168.000000,232140.000000,69100.000000,4.986545)}
{pt3dadd(154800.000000,232560.000000,69550.000000,7.310908)}
{pt3dadd(153720.000000,233220.000000,69425.000000,11.145123)}

{create adhoc125}
{access adhoc125}
{connect adhoc125(1), adhoc121(0)}
{nseg = 1}
{strdef color color = "White"}
{pt3dclear()}
{pt3dadd(163944.000000,228108.000000,66050.000000,15.407018)}
{pt3dadd(164316.000000,228132.000000,66225.000000,10.565918)}
{pt3dadd(164412.000000,228324.000000,66275.000000,10.764908)}
{pt3dadd(164616.000000,229020.000000,66450.000000,7.875595)}
{pt3dadd(165000.000000,229560.000000,66575.000000,9.287602)}

{create adhoc126}
{access adhoc126}
{connect adhoc126(1), adhoc96(0)}
{nseg = 1}
{strdef color color = "White"}
{pt3dclear()}
{pt3dadd(166200.000000,223548.000000,66925.000000,47.921990)}
{pt3dadd(166284.000000,222384.000000,65500.000000,19.446029)}
{pt3dadd(166476.000000,222204.000000,65150.000000,13.515551)}
{pt3dadd(166872.000000,222180.000000,64775.000000,5.221098)}
{pt3dadd(166944.000000,222000.000000,64275.000000,5.229798)}
{pt3dadd(167304.000000,221724.000000,63875.000000,6.449724)}

{create adhoc127}
{access adhoc127}
{connect adhoc127(1), adhoc95(0)}
{nseg = 1}
{strdef color color = "White"}
{pt3dclear()}
{pt3dadd(168132.000000,222852.000000,67375.000000,39.934990)}
{pt3dadd(168240.000000,224424.000000,68775.000000,18.269712)}
{pt3dadd(168504.000000,224724.000000,68800.000000,11.561827)}
{pt3dadd(168720.000000,224892.000000,68925.000000,6.784625)}
{pt3dadd(168720.000000,225168.000000,68900.000000,4.409795)}
{pt3dadd(168684.000000,225336.000000,68900.000000,4.409795)}
{pt3dadd(168612.000000,225480.000000,69125.000000,4.409795)}
{pt3dadd(168624.000000,225708.000000,69625.000000,5.967316)}
{pt3dadd(168684.000000,225924.000000,69825.000000,3.057520)}
{pt3dadd(168780.000000,226068.000000,69875.000000,4.047465)}
{pt3dadd(168756.000000,226212.000000,69950.000000,5.037410)}
{pt3dadd(168804.000000,226368.000000,69900.000000,4.799816)}
{pt3dadd(168780.000000,226404.000000,69950.000000,6.449724)}

{create adhoc128}
{access adhoc128}
{connect adhoc128(1), adhoc94(0)}
{nseg = 1}
{strdef color color = "White"}
{pt3dclear()}
{pt3dadd(172716.000000,216744.000000,69550.000000,57.506386)}
{pt3dadd(172620.000000,214476.000000,66625.000000,32.483155)}
{pt3dadd(172080.000000,214452.000000,66550.000000,24.536057)}

{create adhoc129}
{access adhoc129}
{connect adhoc129(1), adhoc128(0)}
{nseg = 1}
{strdef color color = "White"}
{pt3dclear()}
{pt3dadd(172080.000000,214452.000000,66550.000000,24.536057)}
{pt3dadd(171948.000000,214212.000000,66050.000000,16.382195)}
{pt3dadd(171660.000000,214344.000000,65650.000000,17.964223)}
{pt3dadd(171600.000000,214308.000000,65225.000000,14.058177)}
{pt3dadd(171756.000000,214164.000000,64825.000000,18.488422)}

{create adhoc130}
{access adhoc130}
{connect adhoc130(1), adhoc129(0)}
{nseg = 1}
{strdef color color = "White"}
{pt3dclear()}
{pt3dadd(171756.000000,214164.000000,64825.000000,18.488422)}
{pt3dadd(171552.000000,214056.000000,64275.000000,13.082398)}
{pt3dadd(171444.000000,213840.000000,63800.000000,16.908766)}
{pt3dadd(171372.000000,213624.000000,63375.000000,15.598879)}
{pt3dadd(171264.000000,213300.000000,62825.000000,23.110527)}

{create adhoc131}
{access adhoc131}
{connect adhoc131(1), adhoc130(0)}
{nseg = 1}
{strdef color color = "White"}
{pt3dclear()}
{pt3dadd(171264.000000,213300.000000,62825.000000,23.110527)}
{pt3dadd(171276.000000,213324.000000,62550.000000,14.623100)}
{pt3dadd(171432.000000,212880.000000,62050.000000,13.677714)}
{pt3dadd(171252.000000,212676.000000,61625.000000,8.673090)}
{pt3dadd(170880.000000,212352.000000,61050.000000,11.145123)}

{create adhoc132}
{access adhoc132}
{connect adhoc132(1), adhoc131(0)}
{nseg = 1}
{strdef color color = "White"}
{pt3dclear()}
{pt3dadd(170880.000000,212352.000000,61050.000000,11.145123)}
{pt3dadd(170256.000000,211956.000000,60725.000000,13.374147)}

{create adhoc133}
{access adhoc133}
{connect adhoc133(1), adhoc132(0)}
{nseg = 1}
{strdef color color = "White"}
{pt3dclear()}
{pt3dadd(170256.000000,211956.000000,60725.000000,13.374147)}
{pt3dadd(169272.000000,211644.000000,60300.000000,8.987189)}
{pt3dadd(168948.000000,211644.000000,60125.000000,4.299817)}

{create adhoc134}
{access adhoc134}
{connect adhoc134(1), adhoc132(0)}
{nseg = 1}
{strdef color color = "White"}
{pt3dclear()}
{pt3dadd(170256.000000,211956.000000,60725.000000,13.374147)}
{pt3dadd(170484.000000,212640.000000,60475.000000,11.317667)}
{pt3dadd(170460.000000,213216.000000,60125.000000,7.739669)}

{create adhoc135}
{access adhoc135}
{connect adhoc135(1), adhoc131(0)}
{nseg = 1}
{strdef color color = "White"}
{pt3dclear()}
{pt3dadd(170880.000000,212352.000000,61050.000000,11.145123)}
{pt3dadd(169560.000000,211992.000000,61050.000000,13.103336)}
{pt3dadd(167976.000000,212496.000000,61125.000000,13.496833)}
{pt3dadd(167844.000000,212916.000000,61325.000000,12.325614)}

{create adhoc136}
{access adhoc136}
{connect adhoc136(1), adhoc135(0)}
{nseg = 1}
{strdef color color = "White"}
{pt3dclear()}
{pt3dadd(167844.000000,212916.000000,61325.000000,12.325614)}
{pt3dadd(165696.000000,212976.000000,61425.000000,6.101530)}
{pt3dadd(164052.000000,213144.000000,61450.000000,4.260918)}
{pt3dadd(162492.000000,212844.000000,61525.000000,4.024820)}
{pt3dadd(162252.000000,212820.000000,61300.000000,3.429025)}
{pt3dadd(162024.000000,212880.000000,61250.000000,3.429025)}
{pt3dadd(161796.000000,212880.000000,61250.000000,3.429025)}
{pt3dadd(161064.000000,213000.000000,61275.000000,4.986545)}
{pt3dadd(158736.000000,213108.000000,61275.000000,3.057520)}
{pt3dadd(157116.000000,212856.000000,61325.000000,3.832474)}
{pt3dadd(156456.000000,212916.000000,61575.000000,4.428269)}
{pt3dadd(156168.000000,213192.000000,61650.000000,3.784582)}
{pt3dadd(154944.000000,214092.000000,62100.000000,4.478975)}

{create adhoc137}
{access adhoc137}
{connect adhoc137(1), adhoc135(0)}
{nseg = 1}
{strdef color color = "White"}
{pt3dclear()}
{pt3dadd(167844.000000,212916.000000,61325.000000,12.325614)}
{pt3dadd(167772.000000,213900.000000,61250.000000,12.038087)}
{pt3dadd(168024.000000,214284.000000,61625.000000,9.422540)}
{pt3dadd(168252.000000,214248.000000,61825.000000,4.478975)}

{create adhoc138}
{access adhoc138}
{connect adhoc138(1), adhoc130(0)}
{nseg = 1}
{strdef color color = "White"}
{pt3dclear()}
{pt3dadd(171264.000000,213300.000000,62825.000000,23.110527)}
{pt3dadd(170976.000000,211812.000000,63025.000000,11.299376)}
{pt3dadd(170808.000000,211644.000000,63075.000000,7.379626)}
{pt3dadd(171000.000000,211440.000000,63275.000000,4.305454)}
{pt3dadd(171012.000000,211224.000000,63225.000000,4.305454)}
{pt3dadd(171132.000000,210972.000000,63225.000000,5.080408)}
{pt3dadd(171252.000000,210720.000000,63000.000000,7.467347)}
{pt3dadd(171540.000000,210216.000000,62825.000000,5.374770)}

{create adhoc139}
{access adhoc139}
{connect adhoc139(1), adhoc129(0)}
{nseg = 1}
{strdef color color = "White"}
{pt3dclear()}
{pt3dadd(171756.000000,214164.000000,64825.000000,18.488422)}
{pt3dadd(171204.000000,213264.000000,64775.000000,10.118638)}
{pt3dadd(170856.000000,213072.000000,64525.000000,4.127824)}

{create adhoc140}
{access adhoc140}
{connect adhoc140(1), adhoc139(0)}
{nseg = 1}
{strdef color color = "White"}
{pt3dclear()}
{pt3dadd(170856.000000,213072.000000,64525.000000,4.127824)}
{pt3dadd(169596.000000,212880.000000,64300.000000,4.411691)}
{pt3dadd(169428.000000,212700.000000,64725.000000,3.732480)}

{create adhoc141}
{access adhoc141}
{connect adhoc141(1), adhoc139(0)}
{nseg = 1}
{strdef color color = "White"}
{pt3dclear()}
{pt3dadd(170856.000000,213072.000000,64525.000000,4.127824)}
{pt3dadd(171168.000000,212892.000000,64600.000000,4.158463)}
{pt3dadd(171252.000000,212760.000000,64725.000000,4.531518)}
{pt3dadd(171336.000000,212568.000000,64750.000000,3.894068)}
{pt3dadd(171312.000000,212460.000000,64750.000000,3.732480)}

{create adhoc142}
{access adhoc142}
{connect adhoc142(1), adhoc128(0)}
{nseg = 1}
{strdef color color = "White"}
{pt3dclear()}
{pt3dadd(172080.000000,214452.000000,66550.000000,24.536057)}
{pt3dadd(172044.000000,213336.000000,66550.000000,14.028345)}
{pt3dadd(171960.000000,213132.000000,66675.000000,9.017007)}
{pt3dadd(171888.000000,212952.000000,66725.000000,6.622288)}
{pt3dadd(172056.000000,212760.000000,66775.000000,4.158988)}
{pt3dadd(172224.000000,212448.000000,67150.000000,5.931647)}
{pt3dadd(171816.000000,212196.000000,67525.000000,3.732480)}

{create adhoc143}
{access adhoc143}
{connect adhoc143(1), adhoc93(0)}
{nseg = 1}
{strdef color color = "White"}
{pt3dclear()}
{pt3dadd(173412.000000,216624.000000,70525.000000,66.247350)}
{pt3dadd(173460.000000,215376.000000,71975.000000,26.297491)}
{pt3dadd(173220.000000,215064.000000,72000.000000,16.378495)}
{pt3dadd(173028.000000,214896.000000,72050.000000,5.803854)}
{pt3dadd(172896.000000,215064.000000,72050.000000,3.874829)}
{pt3dadd(172152.000000,214896.000000,71600.000000,7.426584)}
{pt3dadd(172008.000000,214740.000000,71200.000000,10.336379)}
{pt3dadd(171936.000000,214632.000000,70850.000000,12.269250)}
{pt3dadd(171900.000000,214452.000000,70400.000000,16.048977)}

{create adhoc144}
{access adhoc144}
{connect adhoc144(1), adhoc143(0)}
{nseg = 1}
{strdef color color = "White"}
{pt3dclear()}
{pt3dadd(171900.000000,214452.000000,70400.000000,16.048977)}
{pt3dadd(171720.000000,214608.000000,69975.000000,12.387598)}
{pt3dadd(171444.000000,214728.000000,69775.000000,7.739669)}

{create adhoc145}
{access adhoc145}
{connect adhoc145(1), adhoc143(0)}
{nseg = 1}
{strdef color color = "White"}
{pt3dclear()}
{pt3dadd(171900.000000,214452.000000,70400.000000,16.048977)}
{pt3dadd(172032.000000,213876.000000,70350.000000,11.199318)}
{pt3dadd(172152.000000,213372.000000,70050.000000,7.319591)}
{pt3dadd(172116.000000,212820.000000,69650.000000,6.338820)}
{pt3dadd(172056.000000,211680.000000,68900.000000,5.183294)}
{pt3dadd(172068.000000,210492.000000,68500.000000,5.958248)}
{pt3dadd(172200.000000,210216.000000,68075.000000,8.930413)}
{pt3dadd(172224.000000,210108.000000,67900.000000,5.374770)}

{create adhoc146}
{access adhoc146}
{connect adhoc146(1), adhoc92(0)}
{nseg = 1}
{strdef color color = "White"}
{pt3dclear()}
{pt3dadd(176028.000000,215112.000000,72725.000000,61.053560)}
{pt3dadd(175824.000000,213288.000000,72700.000000,24.566228)}
{pt3dadd(175212.000000,211692.000000,72700.000000,15.339737)}
{pt3dadd(175224.000000,211476.000000,72900.000000,4.986545)}
{pt3dadd(175656.000000,211164.000000,73650.000000,3.057520)}
{pt3dadd(175824.000000,210924.000000,73750.000000,3.057520)}
{pt3dadd(175956.000000,210708.000000,73900.000000,3.057520)}
{pt3dadd(176256.000000,210420.000000,74075.000000,5.967316)}
{pt3dadd(176520.000000,210240.000000,74300.000000,4.409795)}
{pt3dadd(176532.000000,210108.000000,74425.000000,4.409795)}
{pt3dadd(176748.000000,209748.000000,74675.000000,4.409795)}
{pt3dadd(176916.000000,209376.000000,75000.000000,5.399740)}
{pt3dadd(177060.000000,209196.000000,75100.000000,2.906581)}
{pt3dadd(177216.000000,209244.000000,75100.000000,3.353077)}
{pt3dadd(177384.000000,209268.000000,75025.000000,4.588461)}
{pt3dadd(177516.000000,209280.000000,75025.000000,3.732480)}

{create adhoc147}
{access adhoc147}
{connect adhoc147(1), adhoc1(0)}
{nseg = 1}
{strdef color color = "White"}
{pt3dclear()}
{pt3dadd(191196.000000,209016.000000,94700.000000,55.206127)}
{pt3dadd(190848.000000,209076.000000,94025.000000,54.530159)}
{pt3dadd(190524.000000,209040.000000,93375.000000,50.877964)}
