# Supplementary material for: Full reconstruction of large lobula plate tangential cells in Drosophila from a 3D EM dataset
Source: PLoS One. 2018 Nov 28;13(11):e0207828. doi: 10.1371/journal.pone.0207828 (PMC6261601; doi:10.1371/journal.pone.0207828)
Supplement: S1 Dataset — (ZIP) [file pone.0207828.s001.zip › Diameter hoc/VS_VSL_preliminary/VS5_5skels_ck.001_completed.hoc0003.hoc]

/* created with convertKnossosNmlToHoc.m */

{create adhoc1}
{access adhoc1}
{nseg = 1}
{strdef color color = "White"}
{pt3dclear()}
{pt3dadd(188856.000000,182148.000000,66750.000000,1000.000000)}
{pt3dadd(188880.000000,181956.000000,66550.000000,334.333333)}
{pt3dadd(188856.000000,181932.000000,66225.000000,1.500000)}
{pt3dadd(188928.000000,181776.000000,66275.000000,1.500000)}
