# Supplementary material for: Full reconstruction of large lobula plate tangential cells in Drosophila from a 3D EM dataset
Source: PLoS One. 2018 Nov 28;13(11):e0207828. doi: 10.1371/journal.pone.0207828 (PMC6261601; doi:10.1371/journal.pone.0207828)
Supplement: S1 Dataset — (ZIP) [file pone.0207828.s001.zip › Diameter hoc/VS_VSL_preliminary/VS5_5skels_ck.001_completed.hoc0004.hoc]

/* created with convertKnossosNmlToHoc.m */

{create adhoc1}
{access adhoc1}
{nseg = 1}
{strdef color color = "White"}
{pt3dclear()}
{pt3dadd(157920.000000,132648.000000,183150.000000,1000.000000)}
{pt3dadd(158004.000000,132684.000000,182775.000000,379.623503)}
{pt3dadd(158004.000000,132816.000000,182325.000000,228.374102)}
{pt3dadd(157968.000000,132792.000000,181875.000000,56.992958)}
{pt3dadd(158016.000000,133116.000000,181500.000000,29.818856)}
{pt3dadd(158016.000000,133356.000000,180400.000000,29.818856)}
{pt3dadd(157932.000000,134256.000000,178850.000000,29.818856)}
{pt3dadd(158196.000000,134712.000000,177300.000000,52.413941)}
{pt3dadd(158028.000000,135144.000000,175600.000000,24.095085)}
{pt3dadd(158412.000000,135432.000000,174725.000000,24.095085)}
{pt3dadd(159864.000000,136140.000000,173500.000000,24.095085)}
{pt3dadd(160152.000000,137412.000000,172125.000000,42.111151)}
{pt3dadd(160476.000000,138936.000000,171100.000000,19.516066)}
{pt3dadd(159804.000000,140772.000000,169700.000000,19.516066)}
{pt3dadd(159252.000000,142248.000000,168050.000000,19.516066)}
{pt3dadd(158592.000000,143988.000000,166850.000000,35.777904)}
{pt3dadd(157284.000000,145704.000000,165575.000000,17.761838)}
{pt3dadd(157368.000000,146724.000000,164400.000000,17.761838)}
{pt3dadd(157068.000000,148008.000000,163275.000000,17.761838)}
{pt3dadd(156288.000000,149148.000000,161975.000000,28.503065)}
{pt3dadd(155400.000000,149556.000000,161050.000000,12.241227)}
{pt3dadd(154584.000000,150420.000000,159975.000000,12.241227)}
{pt3dadd(153780.000000,151008.000000,159100.000000,12.241227)}
{pt3dadd(153756.000000,151320.000000,157900.000000,35.790273)}
{pt3dadd(153216.000000,151152.000000,156875.000000,25.049046)}
{pt3dadd(152424.000000,150468.000000,155750.000000,25.049046)}
{pt3dadd(152148.000000,150588.000000,154925.000000,25.049046)}
{pt3dadd(151908.000000,150408.000000,153825.000000,47.644134)}
{pt3dadd(151860.000000,150276.000000,152825.000000,24.095088)}
{pt3dadd(151524.000000,150504.000000,151700.000000,24.095088)}
{pt3dadd(152028.000000,150612.000000,150275.000000,24.095088)}
{pt3dadd(152184.000000,150936.000000,148650.000000,33.379486)}
{pt3dadd(152676.000000,151140.000000,148175.000000,10.784398)}
{pt3dadd(153348.000000,150744.000000,147475.000000,10.784398)}
{pt3dadd(154428.000000,150780.000000,146500.000000,10.784398)}
{pt3dadd(155208.000000,151308.000000,145475.000000,24.285930)}
{pt3dadd(156024.000000,151740.000000,144950.000000,15.001532)}
{pt3dadd(156744.000000,152676.000000,144150.000000,15.001532)}
{pt3dadd(156984.000000,153264.000000,143725.000000,15.001532)}
{pt3dadd(157512.000000,153744.000000,143200.000000,28.503064)}
{pt3dadd(157812.000000,154296.000000,142875.000000,15.001532)}
{pt3dadd(158280.000000,154872.000000,142600.000000,15.001532)}
{pt3dadd(158556.000000,155508.000000,142375.000000,15.001532)}
{pt3dadd(158700.000000,156108.000000,141875.000000,28.503064)}
{pt3dadd(158700.000000,157260.000000,141450.000000,15.001532)}
{pt3dadd(158772.000000,158808.000000,140800.000000,15.001532)}
{pt3dadd(158652.000000,159792.000000,140275.000000,15.001532)}
{pt3dadd(158736.000000,160644.000000,139675.000000,28.503064)}
{pt3dadd(158964.000000,161496.000000,139275.000000,15.001532)}
{pt3dadd(159372.000000,162240.000000,138925.000000,15.001532)}
{pt3dadd(159864.000000,162816.000000,138700.000000,15.001532)}
{pt3dadd(160152.000000,163272.000000,138500.000000,24.285930)}
{pt3dadd(160464.000000,163908.000000,138125.000000,10.784398)}
{pt3dadd(160740.000000,164352.000000,138000.000000,10.784398)}
{pt3dadd(160512.000000,165048.000000,137675.000000,10.784398)}
{pt3dadd(160704.000000,165552.000000,137400.000000,18.471396)}
{pt3dadd(161076.000000,166380.000000,137375.000000,9.186998)}
{pt3dadd(160968.000000,166944.000000,137125.000000,9.186998)}
{pt3dadd(161532.000000,167640.000000,136850.000000,9.186998)}
{pt3dadd(161904.000000,168276.000000,136400.000000,16.873996)}
{pt3dadd(162336.000000,168996.000000,135825.000000,9.186998)}
{pt3dadd(162732.000000,169296.000000,135200.000000,9.186998)}
{pt3dadd(163140.000000,169836.000000,134525.000000,9.186998)}
{pt3dadd(163512.000000,170184.000000,134225.000000,19.928223)}
{pt3dadd(163980.000000,170808.000000,134000.000000,12.241225)}
{pt3dadd(164568.000000,171384.000000,133400.000000,12.241225)}
{pt3dadd(165012.000000,172176.000000,133200.000000,12.241225)}
{pt3dadd(165408.000000,172704.000000,132875.000000,23.442503)}
{pt3dadd(165912.000000,173256.000000,132400.000000,12.701277)}
{pt3dadd(166512.000000,174012.000000,132000.000000,12.701277)}
{pt3dadd(166980.000000,174612.000000,131850.000000,12.701277)}
{pt3dadd(167340.000000,175320.000000,131600.000000,23.902554)}
{pt3dadd(167664.000000,175860.000000,131500.000000,12.701277)}
{pt3dadd(168084.000000,176316.000000,131275.000000,12.701277)}
{pt3dadd(168564.000000,177012.000000,130850.000000,12.701277)}
{pt3dadd(169152.000000,178092.000000,130725.000000,20.388275)}
{pt3dadd(170172.000000,179124.000000,130000.000000,9.186998)}
{pt3dadd(170748.000000,179832.000000,129525.000000,9.186998)}
{pt3dadd(172116.000000,181032.000000,128750.000000,9.186998)}
{pt3dadd(172980.000000,182112.000000,128300.000000,16.873996)}
{pt3dadd(174636.000000,183000.000000,127400.000000,9.186998)}
{pt3dadd(175884.000000,184272.000000,126725.000000,9.186998)}
{pt3dadd(176496.000000,185316.000000,126025.000000,9.186998)}
{pt3dadd(177372.000000,186684.000000,125775.000000,16.873996)}
{pt3dadd(177972.000000,187824.000000,125075.000000,9.186998)}
{pt3dadd(178500.000000,188820.000000,124550.000000,9.186998)}
{pt3dadd(179196.000000,189696.000000,123900.000000,9.186998)}
{pt3dadd(179736.000000,190260.000000,123625.000000,18.471396)}
{pt3dadd(181212.000000,191064.000000,122600.000000,10.784398)}
{pt3dadd(182256.000000,191772.000000,122025.000000,10.784398)}
{pt3dadd(182772.000000,192228.000000,121425.000000,10.784398)}
{pt3dadd(183504.000000,192528.000000,120850.000000,20.068796)}
{pt3dadd(184584.000000,193356.000000,120100.000000,10.784398)}
{pt3dadd(185616.000000,194244.000000,119600.000000,10.784398)}
{pt3dadd(186264.000000,194508.000000,118875.000000,10.784398)}
{pt3dadd(186468.000000,194832.000000,118500.000000,20.068796)}
{pt3dadd(187272.000000,195000.000000,118150.000000,10.784398)}
{pt3dadd(187692.000000,195168.000000,117775.000000,10.784398)}
{pt3dadd(188196.000000,195480.000000,117100.000000,10.784398)}
{pt3dadd(188568.000000,196200.000000,116725.000000,24.285930)}
{pt3dadd(189156.000000,196788.000000,115900.000000,15.001532)}
{pt3dadd(189456.000000,197112.000000,115175.000000,15.001532)}
{pt3dadd(190008.000000,197436.000000,114675.000000,15.001532)}
{pt3dadd(190620.000000,198000.000000,113725.000000,34.575737)}
{pt3dadd(190680.000000,198828.000000,112850.000000,21.074205)}
{pt3dadd(190968.000000,199260.000000,111800.000000,21.074205)}
{pt3dadd(190824.000000,199092.000000,110875.000000,21.074205)}
{pt3dadd(190680.000000,199176.000000,110250.000000,28.761203)}
{pt3dadd(190824.000000,199548.000000,109675.000000,9.186998)}
{pt3dadd(191244.000000,201060.000000,107500.000000,9.186998)}
{pt3dadd(191664.000000,201468.000000,107250.000000,9.186998)}
{pt3dadd(191784.000000,201516.000000,106950.000000,19.928223)}
{pt3dadd(191844.000000,201756.000000,106550.000000,12.141225)}
{pt3dadd(191784.000000,201864.000000,106300.000000,12.141225)}
{pt3dadd(191724.000000,202188.000000,106025.000000,12.141225)}
{pt3dadd(191964.000000,202584.000000,105025.000000,25.642757)}
{pt3dadd(192360.000000,202908.000000,103875.000000,14.901532)}
{pt3dadd(192120.000000,203580.000000,103175.000000,15.001532)}
{pt3dadd(192564.000000,204108.000000,102500.000000,15.001532)}
{pt3dadd(192552.000000,204600.000000,101850.000000,38.550578)}
{pt3dadd(192492.000000,205080.000000,101050.000000,25.049046)}
{pt3dadd(192564.000000,205536.000000,100300.000000,25.049046)}
{pt3dadd(192348.000000,206064.000000,99575.000000,25.049046)}
{pt3dadd(192072.000000,206640.000000,98525.000000,48.598092)}
{pt3dadd(191916.000000,207264.000000,97400.000000,25.049046)}
{pt3dadd(191676.000000,207756.000000,96625.000000,25.049046)}
{pt3dadd(191076.000000,208332.000000,95775.000000,25.049046)}
{pt3dadd(191136.000000,208860.000000,94975.000000,48.598092)}
{pt3dadd(190836.000000,209088.000000,94275.000000,25.049046)}
{pt3dadd(190488.000000,208884.000000,93375.000000,25.049046)}
{pt3dadd(189984.000000,208968.000000,92250.000000,25.049046)}
{pt3dadd(189732.000000,208860.000000,91450.000000,53.367902)}
{pt3dadd(189396.000000,208992.000000,90700.000000,29.818856)}
{pt3dadd(189072.000000,208764.000000,90000.000000,29.818856)}
{pt3dadd(189120.000000,208380.000000,89250.000000,53.367902)}
{pt3dadd(188604.000000,208380.000000,88650.000000,79.443040)}
{pt3dadd(188280.000000,208188.000000,87750.000000,84.206973)}
{pt3dadd(188472.000000,207816.000000,87125.000000,131.875690)}

{create adhoc2}
{access adhoc2}
{connect adhoc2(1), adhoc1(0)}
{nseg = 1}
{strdef color color = "White"}
{pt3dclear()}
{pt3dadd(188472.000000,207816.000000,87125.000000,131.875690)}
{pt3dadd(189816.000000,204096.000000,87125.000000,60.432560)}
{pt3dadd(189468.000000,202284.000000,85500.000000,36.859536)}
{pt3dadd(189012.000000,201792.000000,84425.000000,20.068796)}
{pt3dadd(189564.000000,201252.000000,83975.000000,10.784398)}
{pt3dadd(189660.000000,200496.000000,83775.000000,10.784398)}
{pt3dadd(189468.000000,199944.000000,83375.000000,10.784398)}
{pt3dadd(189492.000000,199548.000000,82975.000000,21.985675)}
{pt3dadd(189540.000000,199044.000000,82475.000000,23.902554)}
{pt3dadd(189696.000000,198648.000000,82250.000000,37.404086)}
{pt3dadd(189636.000000,197904.000000,81450.000000,61.340144)}
{pt3dadd(189732.000000,197520.000000,81575.000000,69.007660)}

{create adhoc3}
{access adhoc3}
{connect adhoc3(1), adhoc2(0)}
{nseg = 1}
{strdef color color = "White"}
{pt3dclear()}
{pt3dadd(189732.000000,197520.000000,81575.000000,69.007660)}
{pt3dadd(189948.000000,197244.000000,81275.000000,46.505107)}
{pt3dadd(190032.000000,196944.000000,80750.000000,54.954068)}
{pt3dadd(189804.000000,196452.000000,80300.000000,45.585007)}
{pt3dadd(189528.000000,196068.000000,80100.000000,66.247360)}

{create adhoc4}
{access adhoc4}
{connect adhoc4(1), adhoc3(0)}
{nseg = 1}
{strdef color color = "White"}
{pt3dclear()}
{pt3dadd(189528.000000,196068.000000,80100.000000,66.247360)}
{pt3dadd(189564.000000,196440.000000,77725.000000,35.894117)}
{pt3dadd(189444.000000,196440.000000,77475.000000,22.136470)}
{pt3dadd(189348.000000,196476.000000,77100.000000,14.433524)}
{pt3dadd(188964.000000,196344.000000,76800.000000,6.746526)}
{pt3dadd(188664.000000,196428.000000,76425.000000,11.068632)}
{pt3dadd(188424.000000,196704.000000,75875.000000,14.620386)}
{pt3dadd(187896.000000,196920.000000,75450.000000,14.623100)}
{pt3dadd(187896.000000,197172.000000,75150.000000,19.258772)}

{create adhoc5}
{access adhoc5}
{connect adhoc5(1), adhoc4(0)}
{nseg = 1}
{strdef color color = "White"}
{pt3dclear()}
{pt3dadd(187896.000000,197172.000000,75150.000000,19.258772)}
{pt3dadd(188388.000000,197208.000000,74700.000000,20.231254)}
{pt3dadd(188640.000000,197268.000000,74275.000000,12.738752)}
{pt3dadd(188808.000000,197316.000000,73900.000000,15.542830)}
{pt3dadd(188676.000000,197400.000000,73400.000000,7.855832)}
{pt3dadd(188712.000000,197676.000000,72950.000000,7.855832)}
{pt3dadd(188508.000000,197784.000000,72500.000000,7.855832)}
{pt3dadd(188184.000000,197988.000000,72075.000000,9.103766)}
{pt3dadd(187776.000000,197952.000000,71775.000000,2.747934)}
{pt3dadd(187440.000000,198132.000000,71725.000000,2.747934)}
{pt3dadd(187056.000000,198264.000000,71825.000000,2.747934)}
{pt3dadd(186708.000000,198396.000000,71550.000000,6.299688)}
{pt3dadd(186504.000000,198708.000000,71225.000000,5.051754)}
{pt3dadd(186276.000000,198924.000000,71100.000000,5.051754)}
{pt3dadd(186000.000000,199188.000000,71000.000000,5.051754)}
{pt3dadd(185700.000000,199296.000000,70775.000000,10.298281)}
{pt3dadd(185340.000000,199356.000000,70750.000000,6.746526)}
{pt3dadd(184920.000000,199416.000000,70725.000000,6.746526)}
{pt3dadd(184440.000000,199452.000000,70575.000000,6.746526)}
{pt3dadd(184068.000000,199680.000000,70450.000000,11.771192)}
{pt3dadd(183648.000000,199872.000000,70450.000000,6.524665)}
{pt3dadd(183120.000000,200472.000000,70450.000000,6.524665)}
{pt3dadd(182700.000000,200688.000000,70300.000000,6.524665)}
{pt3dadd(182340.000000,200904.000000,70175.000000,11.549331)}
{pt3dadd(181920.000000,201192.000000,70125.000000,6.524665)}
{pt3dadd(181380.000000,201408.000000,69850.000000,6.524665)}
{pt3dadd(181080.000000,201516.000000,69825.000000,6.524665)}
{pt3dadd(180744.000000,201636.000000,69575.000000,9.434461)}
{pt3dadd(180708.000000,201624.000000,69300.000000,4.409795)}
{pt3dadd(179844.000000,201708.000000,68850.000000,4.409795)}
{pt3dadd(179412.000000,201696.000000,68475.000000,4.409795)}
{pt3dadd(178824.000000,201924.000000,68025.000000,7.191199)}
{pt3dadd(178068.000000,202152.000000,67225.000000,8.603509)}
{pt3dadd(177336.000000,201804.000000,66325.000000,14.959341)}
{pt3dadd(176904.000000,202116.000000,66000.000000,23.932235)}
{pt3dadd(176400.000000,202260.000000,65300.000000,33.279160)}

{create adhoc6}
{access adhoc6}
{connect adhoc6(1), adhoc5(0)}
{nseg = 1}
{strdef color color = "White"}
{pt3dclear()}
{pt3dadd(176400.000000,202260.000000,65300.000000,33.279160)}
{pt3dadd(176256.000000,202284.000000,64975.000000,22.242383)}
{pt3dadd(176220.000000,202116.000000,64525.000000,13.945430)}
{pt3dadd(176088.000000,201900.000000,63900.000000,11.141352)}
{pt3dadd(175944.000000,201792.000000,63425.000000,5.051754)}
{pt3dadd(175620.000000,201684.000000,62975.000000,5.051754)}
{pt3dadd(175452.000000,201576.000000,62650.000000,5.051754)}
{pt3dadd(175284.000000,201540.000000,62325.000000,8.603509)}
{pt3dadd(174804.000000,201744.000000,62000.000000,5.051754)}
{pt3dadd(174552.000000,201792.000000,61675.000000,5.051754)}
{pt3dadd(173940.000000,202596.000000,61350.000000,5.051754)}
{pt3dadd(173892.000000,202848.000000,61250.000000,9.373860)}
{pt3dadd(173892.000000,202836.000000,60650.000000,5.822105)}
{pt3dadd(173748.000000,202848.000000,60050.000000,5.822105)}
{pt3dadd(173724.000000,202776.000000,59775.000000,5.822105)}
{pt3dadd(173736.000000,202860.000000,59450.000000,9.373860)}
{pt3dadd(173724.000000,202884.000000,59000.000000,5.051754)}
{pt3dadd(173364.000000,202968.000000,58475.000000,5.051754)}
{pt3dadd(173040.000000,203124.000000,57950.000000,5.051754)}
{pt3dadd(172524.000000,203316.000000,57525.000000,6.980779)}
{pt3dadd(172200.000000,203508.000000,57550.000000,4.418969)}
{pt3dadd(171816.000000,203616.000000,57475.000000,6.364949)}
{pt3dadd(171636.000000,203328.000000,57025.000000,6.449724)}

{create adhoc7}
{access adhoc7}
{connect adhoc7(1), adhoc5(0)}
{nseg = 1}
{strdef color color = "White"}
{pt3dclear()}
{pt3dadd(176400.000000,202260.000000,65300.000000,33.279160)}
{pt3dadd(175428.000000,202356.000000,65525.000000,14.128803)}
{pt3dadd(175272.000000,202344.000000,65500.000000,5.374770)}

{create adhoc8}
{access adhoc8}
{connect adhoc8(1), adhoc4(0)}
{nseg = 1}
{strdef color color = "White"}
{pt3dclear()}
{pt3dadd(187896.000000,197172.000000,75150.000000,19.258772)}
{pt3dadd(186576.000000,197448.000000,75150.000000,11.377640)}
{pt3dadd(186288.000000,197664.000000,74775.000000,7.426584)}
{pt3dadd(186108.000000,197688.000000,74775.000000,6.784625)}
{pt3dadd(185676.000000,197676.000000,74600.000000,4.409795)}
{pt3dadd(185328.000000,197676.000000,74775.000000,4.409795)}
{pt3dadd(184980.000000,197868.000000,75025.000000,4.409795)}
{pt3dadd(184704.000000,197904.000000,75125.000000,5.967316)}
{pt3dadd(184416.000000,197964.000000,75275.000000,3.057520)}
{pt3dadd(184116.000000,197904.000000,75350.000000,3.057520)}
{pt3dadd(183792.000000,197856.000000,75425.000000,3.057520)}
{pt3dadd(183372.000000,198024.000000,75600.000000,8.304047)}
{pt3dadd(182880.000000,198084.000000,75800.000000,6.746526)}
{pt3dadd(182544.000000,198132.000000,75825.000000,6.746526)}
{pt3dadd(182352.000000,198468.000000,76075.000000,6.746526)}
{pt3dadd(182208.000000,198768.000000,76050.000000,8.304047)}
{pt3dadd(181776.000000,199068.000000,75900.000000,3.057520)}
{pt3dadd(181332.000000,199440.000000,75975.000000,3.057520)}
{pt3dadd(181140.000000,199848.000000,76025.000000,3.057520)}
{pt3dadd(180900.000000,200052.000000,76025.000000,4.986545)}
{pt3dadd(180864.000000,200292.000000,76100.000000,3.429025)}
{pt3dadd(180720.000000,200604.000000,76075.000000,3.429025)}
{pt3dadd(180612.000000,200892.000000,76125.000000,3.429025)}
{pt3dadd(180636.000000,201192.000000,76750.000000,5.803854)}
{pt3dadd(180612.000000,201360.000000,76825.000000,3.874829)}
{pt3dadd(180672.000000,201324.000000,77125.000000,3.874829)}
{pt3dadd(180780.000000,201468.000000,77450.000000,3.874829)}
{pt3dadd(180684.000000,201756.000000,77725.000000,4.864774)}
{pt3dadd(180672.000000,201984.000000,77950.000000,3.479890)}
{pt3dadd(180672.000000,202128.000000,77975.000000,4.799816)}
{pt3dadd(180672.000000,202404.000000,78175.000000,6.449724)}

{create adhoc9}
{access adhoc9}
{connect adhoc9(1), adhoc3(0)}
{nseg = 1}
{strdef color color = "White"}
{pt3dclear()}
{pt3dadd(189528.000000,196068.000000,80100.000000,66.247360)}
{pt3dadd(189672.000000,195684.000000,79550.000000,41.751249)}
{pt3dadd(189816.000000,195096.000000,79200.000000,25.650749)}
{pt3dadd(189792.000000,194424.000000,78825.000000,25.120771)}
{pt3dadd(189804.000000,193932.000000,78350.000000,13.919494)}
{pt3dadd(190404.000000,193080.000000,78000.000000,13.919494)}
{pt3dadd(190380.000000,192816.000000,77825.000000,27.421026)}
{pt3dadd(190440.000000,192252.000000,77475.000000,38.622303)}
{pt3dadd(190668.000000,191496.000000,77300.000000,42.671349)}
{pt3dadd(190956.000000,190992.000000,77100.000000,57.506386)}

{create adhoc10}
{access adhoc10}
{connect adhoc10(1), adhoc9(0)}
{nseg = 1}
{strdef color color = "White"}
{pt3dclear()}
{pt3dadd(190956.000000,190992.000000,77100.000000,57.506386)}
{pt3dadd(191112.000000,190416.000000,76800.000000,60.420041)}
{pt3dadd(191532.000000,189432.000000,76350.000000,66.247350)}

{create adhoc11}
{access adhoc11}
{connect adhoc11(1), adhoc10(0)}
{nseg = 1}
{strdef color color = "White"}
{pt3dclear()}
{pt3dadd(191532.000000,189432.000000,76350.000000,66.247350)}
{pt3dadd(191904.000000,188964.000000,76075.000000,50.185513)}
{pt3dadd(192228.000000,188136.000000,75550.000000,30.711308)}
{pt3dadd(192552.000000,187308.000000,75125.000000,30.711308)}
{pt3dadd(192564.000000,187116.000000,74650.000000,30.048835)}
{pt3dadd(192576.000000,186924.000000,74300.000000,40.790061)}
{pt3dadd(192816.000000,186336.000000,74000.000000,66.983434)}
{pt3dadd(193020.000000,185616.000000,73700.000000,55.206127)}

{create adhoc12}
{access adhoc12}
{connect adhoc12(1), adhoc11(0)}
{nseg = 1}
{strdef color color = "White"}
{pt3dclear()}
{pt3dadd(193020.000000,185616.000000,73700.000000,55.206127)}
{pt3dadd(193488.000000,184872.000000,73700.000000,38.070838)}
{pt3dadd(193368.000000,184716.000000,72750.000000,23.442503)}
{pt3dadd(193716.000000,184404.000000,72650.000000,23.902554)}
{pt3dadd(193776.000000,184092.000000,72700.000000,12.701277)}
{pt3dadd(193752.000000,183624.000000,72625.000000,12.701277)}
{pt3dadd(193728.000000,183624.000000,72550.000000,12.701277)}
{pt3dadd(193872.000000,183300.000000,72775.000000,23.442503)}
{pt3dadd(193932.000000,183300.000000,72850.000000,12.241226)}
{pt3dadd(193836.000000,182868.000000,72825.000000,12.241226)}
{pt3dadd(193656.000000,182400.000000,72875.000000,12.241226)}
{pt3dadd(193608.000000,182052.000000,72875.000000,22.540803)}
{pt3dadd(193548.000000,181632.000000,72950.000000,11.799577)}
{pt3dadd(193512.000000,181296.000000,72900.000000,21.083975)}
{pt3dadd(193320.000000,180924.000000,72975.000000,29.984997)}
{pt3dadd(193272.000000,180924.000000,72975.000000,31.809033)}
{pt3dadd(193200.000000,180504.000000,72825.000000,46.005108)}

{create adhoc13}
{access adhoc13}
{connect adhoc13(1), adhoc12(0)}
{nseg = 1}
{strdef color color = "White"}
{pt3dclear()}
{pt3dadd(193200.000000,180504.000000,72825.000000,46.005108)}
{pt3dadd(193368.000000,180144.000000,72975.000000,35.003831)}
{pt3dadd(193428.000000,179904.000000,73125.000000,21.602299)}
{pt3dadd(193416.000000,179604.000000,73200.000000,21.985675)}
{pt3dadd(193620.000000,178524.000000,73275.000000,10.784398)}
{pt3dadd(193836.000000,177552.000000,73825.000000,10.784398)}
{pt3dadd(195156.000000,176664.000000,74625.000000,20.068796)}
{pt3dadd(194892.000000,175716.000000,74275.000000,31.270073)}
{pt3dadd(194892.000000,175152.000000,74025.000000,35.642792)}
{pt3dadd(194928.000000,174552.000000,74150.000000,57.506386)}

{create adhoc14}
{access adhoc14}
{connect adhoc14(1), adhoc13(0)}
{nseg = 1}
{strdef color color = "White"}
{pt3dclear()}
{pt3dadd(194928.000000,174552.000000,74150.000000,57.506386)}
{pt3dadd(195252.000000,173556.000000,74875.000000,35.642792)}
{pt3dadd(196092.000000,173232.000000,75200.000000,21.985675)}
{pt3dadd(196200.000000,172848.000000,75225.000000,18.471396)}
{pt3dadd(196392.000000,172392.000000,75575.000000,9.186998)}
{pt3dadd(196752.000000,171912.000000,75850.000000,9.186998)}
{pt3dadd(196944.000000,171288.000000,76225.000000,9.186998)}
{pt3dadd(197712.000000,168876.000000,76775.000000,16.873996)}
{pt3dadd(198096.000000,168336.000000,76600.000000,16.554517)}
{pt3dadd(198516.000000,167664.000000,76975.000000,26.590861)}
{pt3dadd(198636.000000,167544.000000,77000.000000,38.337593)}

{create adhoc15}
{access adhoc15}
{connect adhoc15(1), adhoc14(0)}
{nseg = 1}
{strdef color color = "White"}
{pt3dclear()}
{pt3dadd(198636.000000,167544.000000,77000.000000,38.337593)}
{pt3dadd(198840.000000,167076.000000,76950.000000,29.253194)}
{pt3dadd(198840.000000,166980.000000,77100.000000,27.436315)}
{pt3dadd(198888.000000,166296.000000,77175.000000,30.368374)}
{pt3dadd(198900.000000,165852.000000,77025.000000,34.139960)}
{pt3dadd(198924.000000,165420.000000,76975.000000,52.997890)}

{create adhoc16}
{access adhoc16}
{connect adhoc16(1), adhoc15(0)}
{nseg = 1}
{strdef color color = "White"}
{pt3dclear()}
{pt3dadd(198924.000000,165420.000000,76975.000000,52.997890)}
{pt3dadd(199248.000000,164496.000000,76975.000000,34.139960)}
{pt3dadd(199080.000000,163980.000000,77050.000000,21.083976)}
{pt3dadd(198888.000000,163452.000000,77050.000000,20.068796)}
{pt3dadd(199044.000000,162900.000000,77250.000000,18.471396)}
{pt3dadd(198852.000000,162468.000000,77325.000000,29.785660)}
{pt3dadd(198912.000000,162072.000000,77525.000000,39.934990)}

{create adhoc17}
{access adhoc17}
{connect adhoc17(1), adhoc16(0)}
{nseg = 1}
{strdef color color = "White"}
{pt3dclear()}
{pt3dadd(198912.000000,162072.000000,77525.000000,39.934990)}
{pt3dadd(197748.000000,162384.000000,77950.000000,15.531590)}
{pt3dadd(197724.000000,162504.000000,78075.000000,9.918954)}
{pt3dadd(197784.000000,162588.000000,78175.000000,4.160981)}
{pt3dadd(197784.000000,162828.000000,78425.000000,6.980779)}
{pt3dadd(197892.000000,163044.000000,78700.000000,10.634632)}
{pt3dadd(198036.000000,163356.000000,78725.000000,19.258772)}

{create adhoc18}
{access adhoc18}
{connect adhoc18(1), adhoc16(0)}
{nseg = 1}
{strdef color color = "White"}
{pt3dclear()}
{pt3dadd(198912.000000,162072.000000,77525.000000,39.934990)}
{pt3dadd(198912.000000,161880.000000,77525.000000,27.123327)}
{pt3dadd(198864.000000,161664.000000,77550.000000,16.873996)}
{pt3dadd(198816.000000,161340.000000,77550.000000,15.542830)}
{pt3dadd(198720.000000,161076.000000,77550.000000,7.855832)}
{pt3dadd(198708.000000,160932.000000,77550.000000,7.855832)}
{pt3dadd(198708.000000,160776.000000,77600.000000,15.542830)}
{pt3dadd(198756.000000,160512.000000,77675.000000,21.898662)}
{pt3dadd(198672.000000,160140.000000,77725.000000,24.904717)}
{pt3dadd(198612.000000,160056.000000,77775.000000,33.279160)}

{create adhoc19}
{access adhoc19}
{connect adhoc19(1), adhoc18(0)}
{nseg = 1}
{strdef color color = "White"}
{pt3dclear()}
{pt3dadd(198612.000000,160056.000000,77775.000000,33.279160)}
{pt3dadd(197880.000000,160056.000000,78475.000000,13.384643)}
{pt3dadd(197748.000000,159876.000000,78500.000000,8.630786)}
{pt3dadd(197652.000000,159792.000000,78575.000000,5.056357)}
{pt3dadd(197496.000000,159744.000000,78850.000000,4.281403)}
{pt3dadd(197388.000000,159684.000000,79025.000000,4.281403)}
{pt3dadd(197352.000000,159780.000000,79175.000000,4.281403)}
{pt3dadd(197508.000000,159924.000000,79375.000000,6.656233)}
{pt3dadd(197496.000000,160056.000000,80175.000000,3.874829)}
{pt3dadd(197448.000000,160224.000000,80450.000000,3.874829)}
{pt3dadd(197652.000000,160440.000000,80700.000000,3.874829)}
{pt3dadd(197856.000000,160728.000000,80925.000000,6.249659)}
{pt3dadd(197976.000000,160980.000000,81100.000000,5.803854)}
{pt3dadd(198012.000000,161016.000000,81275.000000,7.361374)}
{pt3dadd(198120.000000,161016.000000,81525.000000,11.268957)}
{pt3dadd(198000.000000,160956.000000,81825.000000,9.287602)}

{create adhoc20}
{access adhoc20}
{connect adhoc20(1), adhoc19(0)}
{nseg = 1}
{strdef color color = "White"}
{pt3dclear()}
{pt3dadd(198000.000000,160956.000000,81825.000000,9.287602)}
{pt3dadd(197868.000000,160800.000000,81900.000000,6.679047)}
{pt3dadd(197748.000000,160572.000000,81850.000000,5.374770)}
{pt3dadd(197604.000000,160440.000000,81925.000000,5.374770)}

{create adhoc21}
{access adhoc21}
{connect adhoc21(1), adhoc19(0)}
{nseg = 1}
{strdef color color = "White"}
{pt3dclear()}
{pt3dadd(198000.000000,160956.000000,81825.000000,9.287602)}
{pt3dadd(197964.000000,161124.000000,82250.000000,6.691735)}
{pt3dadd(198012.000000,161184.000000,82400.000000,4.615041)}
{pt3dadd(198132.000000,161376.000000,82475.000000,4.047465)}
{pt3dadd(198252.000000,161520.000000,82550.000000,2.489945)}
{pt3dadd(198408.000000,161664.000000,82775.000000,2.489945)}
{pt3dadd(198576.000000,161832.000000,83050.000000,2.489945)}
{pt3dadd(198684.000000,161940.000000,83125.000000,3.264899)}
{pt3dadd(198876.000000,162144.000000,83300.000000,2.274954)}
{pt3dadd(198876.000000,162480.000000,83575.000000,3.522888)}
{pt3dadd(198768.000000,162648.000000,83800.000000,4.297842)}
{pt3dadd(198684.000000,162780.000000,83975.000000,4.871480)}
{pt3dadd(198588.000000,162708.000000,83950.000000,5.374770)}

{create adhoc22}
{access adhoc22}
{connect adhoc22(1), adhoc18(0)}
{nseg = 1}
{strdef color color = "White"}
{pt3dclear()}
{pt3dadd(198612.000000,160056.000000,77775.000000,33.279160)}
{pt3dadd(198744.000000,159816.000000,77725.000000,22.686107)}
{pt3dadd(198780.000000,159288.000000,77625.000000,14.211664)}
{pt3dadd(199032.000000,159012.000000,77600.000000,16.756854)}
{pt3dadd(199032.000000,158472.000000,77600.000000,10.401022)}
{pt3dadd(199044.000000,158172.000000,77600.000000,10.401022)}
{pt3dadd(199080.000000,157824.000000,77675.000000,10.401022)}
{pt3dadd(199044.000000,157632.000000,77875.000000,19.302044)}
{pt3dadd(199116.000000,157380.000000,77925.000000,18.934002)}
{pt3dadd(199116.000000,157128.000000,77925.000000,30.556669)}
{pt3dadd(199116.000000,157044.000000,77900.000000,44.164900)}

{create adhoc23}
{access adhoc23}
{connect adhoc23(1), adhoc22(0)}
{nseg = 1}
{strdef color color = "White"}
{pt3dclear()}
{pt3dadd(199116.000000,157044.000000,77900.000000,44.164900)}
{pt3dadd(198072.000000,157044.000000,77000.000000,17.801523)}
{pt3dadd(197916.000000,156768.000000,77000.000000,11.280914)}
{pt3dadd(197616.000000,156576.000000,76675.000000,5.122763)}
{pt3dadd(197460.000000,156432.000000,76500.000000,3.874829)}
{pt3dadd(197280.000000,156240.000000,76525.000000,3.874829)}
{pt3dadd(197100.000000,156048.000000,76350.000000,3.874829)}
{pt3dadd(196944.000000,155976.000000,76275.000000,6.784625)}
{pt3dadd(196872.000000,156024.000000,76075.000000,4.409795)}
{pt3dadd(196740.000000,155940.000000,75900.000000,7.319591)}
{pt3dadd(196608.000000,155940.000000,75850.000000,10.871345)}
{pt3dadd(196560.000000,155748.000000,75750.000000,12.269250)}
{pt3dadd(196536.000000,155628.000000,75500.000000,19.258772)}

{create adhoc24}
{access adhoc24}
{connect adhoc24(1), adhoc23(0)}
{nseg = 1}
{strdef color color = "White"}
{pt3dclear()}
{pt3dadd(196536.000000,155628.000000,75500.000000,19.258772)}
{pt3dadd(196692.000000,155664.000000,75250.000000,19.258772)}

{create adhoc25}
{access adhoc25}
{connect adhoc25(1), adhoc23(0)}
{nseg = 1}
{strdef color color = "White"}
{pt3dclear()}
{pt3dadd(196536.000000,155628.000000,75500.000000,19.258772)}
{pt3dadd(196380.000000,155772.000000,75550.000000,13.339181)}
{pt3dadd(196236.000000,155736.000000,75625.000000,8.603509)}
{pt3dadd(196116.000000,155736.000000,75600.000000,6.980779)}
{pt3dadd(196164.000000,156324.000000,75200.000000,3.429025)}
{pt3dadd(196068.000000,156408.000000,75000.000000,3.429025)}
{pt3dadd(195852.000000,156432.000000,74850.000000,3.429025)}
{pt3dadd(195708.000000,156408.000000,74725.000000,5.358049)}
{pt3dadd(195516.000000,156300.000000,74475.000000,3.429025)}
{pt3dadd(195372.000000,156156.000000,74325.000000,3.429025)}
{pt3dadd(195228.000000,156180.000000,74175.000000,3.429025)}
{pt3dadd(195180.000000,156288.000000,73850.000000,4.986545)}
{pt3dadd(195048.000000,156348.000000,73600.000000,3.057520)}
{pt3dadd(194868.000000,156408.000000,73450.000000,3.057520)}
{pt3dadd(194700.000000,156408.000000,73275.000000,3.057520)}
{pt3dadd(194544.000000,156396.000000,73125.000000,4.986545)}
{pt3dadd(194364.000000,156324.000000,72875.000000,5.268888)}
{pt3dadd(194268.000000,156408.000000,72700.000000,7.781480)}
{pt3dadd(194184.000000,156456.000000,72650.000000,10.699317)}

{create adhoc26}
{access adhoc26}
{connect adhoc26(1), adhoc25(0)}
{nseg = 1}
{strdef color color = "White"}
{pt3dclear()}
{pt3dadd(194184.000000,156456.000000,72650.000000,10.699317)}
{pt3dadd(194040.000000,156312.000000,72625.000000,6.449724)}

{create adhoc27}
{access adhoc27}
{connect adhoc27(1), adhoc25(0)}
{nseg = 1}
{strdef color color = "White"}
{pt3dclear()}
{pt3dadd(194184.000000,156456.000000,72650.000000,10.699317)}
{pt3dadd(194016.000000,156600.000000,72400.000000,8.812214)}
{pt3dadd(193920.000000,156660.000000,72250.000000,7.825665)}
{pt3dadd(193968.000000,156804.000000,72125.000000,7.739669)}

{create adhoc28}
{access adhoc28}
{connect adhoc28(1), adhoc22(0)}
{nseg = 1}
{strdef color color = "White"}
{pt3dclear()}
{pt3dadd(199116.000000,157044.000000,77900.000000,44.164900)}
{pt3dadd(199080.000000,157260.000000,77825.000000,31.195630)}
{pt3dadd(199116.000000,156816.000000,77900.000000,19.317378)}
{pt3dadd(199152.000000,156468.000000,77975.000000,18.471396)}
{pt3dadd(199308.000000,156192.000000,78025.000000,16.873996)}
{pt3dadd(199320.000000,155928.000000,78025.000000,27.123327)}
{pt3dadd(199368.000000,155700.000000,78025.000000,39.934990)}

{create adhoc29}
{access adhoc29}
{connect adhoc29(1), adhoc28(0)}
{nseg = 1}
{strdef color color = "White"}
{pt3dclear()}
{pt3dadd(199368.000000,155700.000000,78025.000000,39.934990)}
{pt3dadd(198936.000000,155700.000000,78975.000000,9.287602)}

{create adhoc30}
{access adhoc30}
{connect adhoc30(1), adhoc28(0)}
{nseg = 1}
{strdef color color = "White"}
{pt3dclear()}
{pt3dadd(199368.000000,155700.000000,78025.000000,39.934990)}
{pt3dadd(199428.000000,155436.000000,78100.000000,27.123327)}
{pt3dadd(199464.000000,155292.000000,78100.000000,16.873996)}
{pt3dadd(199500.000000,155076.000000,78100.000000,16.873996)}
{pt3dadd(199512.000000,154848.000000,78100.000000,9.186998)}
{pt3dadd(199488.000000,154488.000000,78050.000000,9.186998)}
{pt3dadd(199464.000000,154260.000000,78000.000000,9.186998)}
{pt3dadd(199440.000000,154068.000000,77950.000000,16.873996)}
{pt3dadd(199368.000000,153720.000000,77950.000000,9.186998)}
{pt3dadd(199248.000000,153528.000000,77900.000000,9.186998)}
{pt3dadd(199152.000000,153192.000000,78000.000000,9.186998)}
{pt3dadd(199056.000000,152664.000000,78050.000000,15.542830)}
{pt3dadd(198960.000000,152604.000000,77975.000000,7.855832)}
{pt3dadd(198936.000000,152304.000000,77875.000000,7.855832)}
{pt3dadd(198864.000000,151884.000000,77875.000000,7.855832)}
{pt3dadd(198732.000000,151536.000000,77825.000000,14.916650)}
{pt3dadd(198636.000000,150936.000000,77750.000000,8.560818)}
{pt3dadd(198588.000000,150588.000000,77600.000000,8.560818)}
{pt3dadd(198576.000000,150240.000000,77450.000000,16.247816)}
{pt3dadd(198600.000000,149976.000000,77400.000000,23.934814)}
{pt3dadd(198624.000000,149724.000000,77425.000000,27.123327)}
{pt3dadd(198624.000000,149568.000000,77350.000000,39.934990)}

{create adhoc31}
{access adhoc31}
{connect adhoc31(1), adhoc30(0)}
{nseg = 1}
{strdef color color = "White"}
{pt3dclear()}
{pt3dadd(198624.000000,149568.000000,77350.000000,39.934990)}
{pt3dadd(198864.000000,149448.000000,76350.000000,19.161322)}
{pt3dadd(198636.000000,148944.000000,76150.000000,12.096793)}
{pt3dadd(198540.000000,148752.000000,75875.000000,9.434461)}
{pt3dadd(198540.000000,148956.000000,75300.000000,6.524665)}
{pt3dadd(198540.000000,149304.000000,74825.000000,6.524665)}
{pt3dadd(198348.000000,149232.000000,74675.000000,6.524665)}
{pt3dadd(198204.000000,149220.000000,74400.000000,11.771192)}
{pt3dadd(198192.000000,149232.000000,74125.000000,6.746526)}
{pt3dadd(198216.000000,149292.000000,73825.000000,6.746526)}
{pt3dadd(198120.000000,149328.000000,73500.000000,6.746526)}
{pt3dadd(198036.000000,149364.000000,73275.000000,14.433524)}
{pt3dadd(198024.000000,149472.000000,73025.000000,9.186998)}
{pt3dadd(197916.000000,149592.000000,72725.000000,9.186998)}
{pt3dadd(197832.000000,149700.000000,72400.000000,9.186998)}
{pt3dadd(197796.000000,149676.000000,72150.000000,14.211663)}
{pt3dadd(197772.000000,149616.000000,71750.000000,11.771192)}
{pt3dadd(197508.000000,149328.000000,71525.000000,16.093297)}
{pt3dadd(197424.000000,149160.000000,71275.000000,25.822162)}
{pt3dadd(197352.000000,149268.000000,71200.000000,23.110527)}

{create adhoc32}
{access adhoc32}
{connect adhoc32(1), adhoc31(0)}
{nseg = 1}
{strdef color color = "White"}
{pt3dclear()}
{pt3dadd(197352.000000,149268.000000,71200.000000,23.110527)}
{pt3dadd(197028.000000,150024.000000,70975.000000,14.623100)}
{pt3dadd(197028.000000,150072.000000,70825.000000,9.373860)}
{pt3dadd(196812.000000,150288.000000,70625.000000,8.603509)}
{pt3dadd(196440.000000,150600.000000,70300.000000,5.051754)}
{pt3dadd(196440.000000,150840.000000,69975.000000,5.051754)}
{pt3dadd(196152.000000,151116.000000,69675.000000,5.051754)}
{pt3dadd(195924.000000,151308.000000,69275.000000,8.603509)}
{pt3dadd(195552.000000,151920.000000,68875.000000,5.051754)}
{pt3dadd(195348.000000,152160.000000,68625.000000,5.051754)}
{pt3dadd(194928.000000,152388.000000,68225.000000,5.051754)}
{pt3dadd(194688.000000,152544.000000,67825.000000,9.373860)}
{pt3dadd(194208.000000,152940.000000,67450.000000,5.822105)}
{pt3dadd(193812.000000,153468.000000,66975.000000,5.822105)}
{pt3dadd(193692.000000,153660.000000,66725.000000,5.822105)}
{pt3dadd(193704.000000,153696.000000,66450.000000,8.731901)}
{pt3dadd(193632.000000,153600.000000,66225.000000,4.409795)}
{pt3dadd(193608.000000,154056.000000,66525.000000,4.409795)}
{pt3dadd(193656.000000,154236.000000,66575.000000,6.784625)}
{pt3dadd(193632.000000,154488.000000,66600.000000,9.694420)}
{pt3dadd(193320.000000,154776.000000,66650.000000,10.307708)}
{pt3dadd(192936.000000,154956.000000,66650.000000,16.048977)}

{create adhoc33}
{access adhoc33}
{connect adhoc33(1), adhoc32(0)}
{nseg = 1}
{strdef color color = "White"}
{pt3dclear()}
{pt3dadd(192936.000000,154956.000000,66650.000000,16.048977)}
{pt3dadd(192984.000000,155244.000000,66875.000000,12.269250)}
{pt3dadd(193044.000000,155448.000000,67200.000000,11.861290)}
{pt3dadd(193092.000000,155388.000000,67625.000000,7.999567)}
{pt3dadd(193068.000000,155424.000000,67925.000000,6.449724)}

{create adhoc34}
{access adhoc34}
{connect adhoc34(1), adhoc32(0)}
{nseg = 1}
{strdef color color = "White"}
{pt3dclear()}
{pt3dadd(192936.000000,154956.000000,66650.000000,16.048977)}
{pt3dadd(192336.000000,155052.000000,66600.000000,8.335642)}
{pt3dadd(191400.000000,155352.000000,66350.000000,4.478975)}

{create adhoc35}
{access adhoc35}
{connect adhoc35(1), adhoc31(0)}
{nseg = 1}
{strdef color color = "White"}
{pt3dclear()}
{pt3dadd(197352.000000,149268.000000,71200.000000,23.110527)}
{pt3dadd(196908.000000,148356.000000,71200.000000,14.623100)}
{pt3dadd(196548.000000,147888.000000,70950.000000,9.373860)}
{pt3dadd(196392.000000,147708.000000,70775.000000,7.833158)}
{pt3dadd(196296.000000,147396.000000,70725.000000,6.656233)}
{pt3dadd(196056.000000,146988.000000,70650.000000,10.093722)}
{pt3dadd(195924.000000,146688.000000,70625.000000,13.374147)}

{create adhoc36}
{access adhoc36}
{connect adhoc36(1), adhoc35(0)}
{nseg = 1}
{strdef color color = "White"}
{pt3dclear()}
{pt3dadd(195924.000000,146688.000000,70625.000000,13.374147)}
{pt3dadd(195312.000000,146724.000000,70775.000000,8.673090)}
{pt3dadd(195156.000000,146700.000000,70975.000000,5.803854)}
{pt3dadd(194928.000000,146736.000000,70875.000000,4.418969)}
{pt3dadd(194700.000000,146820.000000,70850.000000,3.479890)}
{pt3dadd(194556.000000,146892.000000,70775.000000,4.799816)}
{pt3dadd(194436.000000,146952.000000,70700.000000,6.449724)}

{create adhoc37}
{access adhoc37}
{connect adhoc37(1), adhoc35(0)}
{nseg = 1}
{strdef color color = "White"}
{pt3dclear()}
{pt3dadd(195924.000000,146688.000000,70625.000000,13.374147)}
{pt3dadd(195900.000000,146328.000000,70625.000000,10.307708)}
{pt3dadd(195792.000000,145644.000000,70375.000000,6.784625)}
{pt3dadd(195588.000000,145428.000000,70350.000000,6.784625)}
{pt3dadd(195420.000000,145176.000000,70100.000000,3.874829)}
{pt3dadd(195228.000000,144900.000000,69850.000000,3.874829)}
{pt3dadd(195156.000000,144624.000000,69750.000000,3.874829)}
{pt3dadd(194904.000000,144408.000000,69525.000000,5.803854)}
{pt3dadd(194808.000000,144120.000000,69425.000000,3.429025)}
{pt3dadd(194736.000000,143832.000000,69200.000000,3.429025)}
{pt3dadd(194520.000000,143532.000000,69125.000000,3.429025)}
{pt3dadd(194292.000000,143268.000000,68975.000000,5.696861)}
{pt3dadd(194232.000000,143124.000000,68850.000000,3.767836)}
{pt3dadd(194100.000000,142800.000000,68625.000000,3.767836)}
{pt3dadd(193920.000000,142512.000000,68550.000000,5.325357)}
{pt3dadd(193848.000000,142248.000000,68525.000000,9.647462)}
{pt3dadd(193704.000000,141960.000000,68400.000000,11.299376)}
{pt3dadd(193464.000000,141552.000000,68225.000000,23.110527)}

{create adhoc38}
{access adhoc38}
{connect adhoc38(1), adhoc37(0)}
{nseg = 1}
{strdef color color = "White"}
{pt3dclear()}
{pt3dadd(193464.000000,141552.000000,68225.000000,23.110527)}
{pt3dadd(193404.000000,141480.000000,67800.000000,15.907018)}
{pt3dadd(193332.000000,141384.000000,67275.000000,15.963802)}
{pt3dadd(193332.000000,141180.000000,66850.000000,11.199318)}
{pt3dadd(193260.000000,141132.000000,66600.000000,16.048977)}

{create adhoc39}
{access adhoc39}
{connect adhoc39(1), adhoc37(0)}
{nseg = 1}
{strdef color color = "White"}
{pt3dclear()}
{pt3dadd(193464.000000,141552.000000,68225.000000,23.110527)}
{pt3dadd(193332.000000,141228.000000,68700.000000,12.483236)}
{pt3dadd(193236.000000,141108.000000,68800.000000,8.089942)}
{pt3dadd(193140.000000,140796.000000,69100.000000,5.015770)}
{pt3dadd(192996.000000,140376.000000,69450.000000,2.747934)}
{pt3dadd(192912.000000,140004.000000,69575.000000,2.747934)}
{pt3dadd(192720.000000,139788.000000,69625.000000,4.305454)}
{pt3dadd(192720.000000,139488.000000,69625.000000,5.295399)}
{pt3dadd(192876.000000,139212.000000,69525.000000,5.745775)}
{pt3dadd(192828.000000,138960.000000,69450.000000,6.449724)}

{create adhoc40}
{access adhoc40}
{connect adhoc40(1), adhoc30(0)}
{nseg = 1}
{strdef color color = "White"}
{pt3dclear()}
{pt3dadd(198624.000000,149568.000000,77350.000000,39.934990)}
{pt3dadd(198612.000000,148884.000000,77350.000000,27.123327)}
{pt3dadd(198612.000000,148536.000000,77400.000000,16.873996)}
{pt3dadd(198588.000000,148308.000000,77275.000000,13.509103)}
{pt3dadd(198648.000000,147924.000000,77400.000000,5.822105)}
{pt3dadd(198744.000000,147552.000000,77625.000000,5.822105)}
{pt3dadd(198900.000000,147204.000000,77850.000000,5.822105)}
{pt3dadd(198996.000000,146940.000000,77975.000000,10.144211)}
{pt3dadd(199020.000000,146604.000000,78150.000000,5.822105)}
{pt3dadd(199044.000000,146232.000000,78100.000000,5.822105)}
{pt3dadd(199068.000000,145944.000000,78050.000000,5.822105)}
{pt3dadd(199080.000000,145668.000000,78050.000000,11.068632)}
{pt3dadd(199164.000000,145272.000000,77850.000000,6.746526)}
{pt3dadd(199272.000000,144804.000000,77800.000000,6.746526)}
{pt3dadd(199296.000000,144228.000000,77700.000000,6.746526)}
{pt3dadd(199284.000000,143964.000000,77625.000000,14.114044)}
{pt3dadd(199248.000000,143616.000000,77775.000000,8.867518)}
{pt3dadd(199128.000000,143352.000000,77975.000000,8.867518)}
{pt3dadd(199080.000000,143052.000000,77975.000000,8.867518)}
{pt3dadd(198984.000000,142224.000000,78100.000000,18.151916)}
{pt3dadd(198972.000000,141972.000000,78275.000000,18.471396)}
{pt3dadd(198984.000000,141732.000000,78375.000000,29.785660)}
{pt3dadd(198912.000000,141504.000000,78375.000000,39.934990)}

{create adhoc41}
{access adhoc41}
{connect adhoc41(1), adhoc40(0)}
{nseg = 1}
{strdef color color = "White"}
{pt3dclear()}
{pt3dadd(198912.000000,141504.000000,78375.000000,39.934990)}
{pt3dadd(199152.000000,141504.000000,79900.000000,19.161322)}
{pt3dadd(199032.000000,141348.000000,80325.000000,12.096793)}
{pt3dadd(199056.000000,141420.000000,80700.000000,7.191199)}
{pt3dadd(199032.000000,141600.000000,80975.000000,4.281404)}
{pt3dadd(199092.000000,141828.000000,81225.000000,7.191199)}
{pt3dadd(199188.000000,141960.000000,81475.000000,9.120224)}
{pt3dadd(199092.000000,142092.000000,81850.000000,9.564700)}
{pt3dadd(198696.000000,142116.000000,82050.000000,11.145123)}

{create adhoc42}
{access adhoc42}
{connect adhoc42(1), adhoc41(0)}
{nseg = 1}
{strdef color color = "White"}
{pt3dclear()}
{pt3dadd(198696.000000,142116.000000,82050.000000,11.145123)}
{pt3dadd(199104.000000,142296.000000,82350.000000,10.634632)}
{pt3dadd(199152.000000,142356.000000,82550.000000,6.980779)}
{pt3dadd(199032.000000,142416.000000,82850.000000,8.603509)}
{pt3dadd(198912.000000,142440.000000,83125.000000,5.051754)}
{pt3dadd(198828.000000,142488.000000,83325.000000,7.961550)}
{pt3dadd(198804.000000,142716.000000,83600.000000,9.890574)}
{pt3dadd(198816.000000,142896.000000,83800.000000,9.564700)}
{pt3dadd(198768.000000,143016.000000,84075.000000,11.145123)}

{create adhoc43}
{access adhoc43}
{connect adhoc43(1), adhoc42(0)}
{nseg = 1}
{strdef color color = "White"}
{pt3dclear()}
{pt3dadd(198768.000000,143016.000000,84075.000000,11.145123)}
{pt3dadd(198744.000000,142656.000000,84300.000000,8.602498)}
{pt3dadd(198648.000000,142548.000000,84275.000000,6.380449)}
{pt3dadd(198540.000000,142320.000000,84225.000000,4.478975)}

{create adhoc44}
{access adhoc44}
{connect adhoc44(1), adhoc42(0)}
{nseg = 1}
{strdef color color = "White"}
{pt3dclear()}
{pt3dadd(198768.000000,143016.000000,84075.000000,11.145123)}
{pt3dadd(198900.000000,143220.000000,84200.000000,7.930082)}
{pt3dadd(198984.000000,143268.000000,84175.000000,7.122948)}
{pt3dadd(198924.000000,143424.000000,84275.000000,4.441498)}
{pt3dadd(198972.000000,143628.000000,84500.000000,5.374770)}

{create adhoc45}
{access adhoc45}
{connect adhoc45(1), adhoc41(0)}
{nseg = 1}
{strdef color color = "White"}
{pt3dclear()}
{pt3dadd(198696.000000,142116.000000,82050.000000,11.145123)}
{pt3dadd(198444.000000,142080.000000,82175.000000,7.930082)}
{pt3dadd(198216.000000,142044.000000,82050.000000,5.358049)}
{pt3dadd(197952.000000,142080.000000,81775.000000,4.676958)}
{pt3dadd(197760.000000,142080.000000,81825.000000,2.747934)}
{pt3dadd(197532.000000,142104.000000,81700.000000,3.522888)}
{pt3dadd(197328.000000,142092.000000,81750.000000,4.512833)}
{pt3dadd(197076.000000,142320.000000,81775.000000,4.441498)}
{pt3dadd(196908.000000,142440.000000,81925.000000,6.449724)}

{create adhoc46}
{access adhoc46}
{connect adhoc46(1), adhoc40(0)}
{nseg = 1}
{strdef color color = "White"}
{pt3dclear()}
{pt3dadd(198912.000000,141504.000000,78375.000000,39.934990)}
{pt3dadd(198840.000000,141168.000000,78275.000000,24.460994)}
{pt3dadd(198696.000000,140736.000000,78275.000000,15.276596)}
{pt3dadd(198612.000000,140352.000000,78225.000000,13.945430)}
{pt3dadd(198564.000000,140076.000000,78250.000000,7.855832)}
{pt3dadd(198564.000000,139812.000000,78225.000000,7.855832)}
{pt3dadd(198564.000000,139536.000000,78200.000000,7.855832)}
{pt3dadd(198564.000000,139308.000000,78175.000000,14.211664)}
{pt3dadd(198468.000000,139128.000000,78150.000000,14.211664)}
{pt3dadd(198420.000000,138876.000000,78175.000000,20.301262)}
{pt3dadd(198396.000000,138660.000000,78100.000000,32.835437)}
{pt3dadd(198360.000000,138432.000000,78100.000000,31.947992)}

{create adhoc47}
{access adhoc47}
{connect adhoc47(1), adhoc46(0)}
{nseg = 1}
{strdef color color = "White"}
{pt3dclear()}
{pt3dadd(198360.000000,138432.000000,78100.000000,31.947992)}
{pt3dadd(198276.000000,138432.000000,79075.000000,14.245198)}
{pt3dadd(198144.000000,138288.000000,79275.000000,9.147119)}
{pt3dadd(198024.000000,138204.000000,79450.000000,5.432350)}
{pt3dadd(197856.000000,138096.000000,79600.000000,3.874829)}
{pt3dadd(197688.000000,137904.000000,79775.000000,3.874829)}
{pt3dadd(197640.000000,137808.000000,79950.000000,3.874829)}
{pt3dadd(197664.000000,137748.000000,80175.000000,6.784625)}
{pt3dadd(197700.000000,137580.000000,80425.000000,4.409795)}
{pt3dadd(197688.000000,137412.000000,80775.000000,4.409795)}
{pt3dadd(197700.000000,137172.000000,80975.000000,4.409795)}
{pt3dadd(197736.000000,137028.000000,81100.000000,5.399740)}
{pt3dadd(197868.000000,137052.000000,81350.000000,2.489945)}
{pt3dadd(198216.000000,136908.000000,81650.000000,2.489945)}
{pt3dadd(198420.000000,136668.000000,81800.000000,4.047465)}
{pt3dadd(198528.000000,136536.000000,82050.000000,5.037410)}
{pt3dadd(198660.000000,136224.000000,82475.000000,5.745775)}
{pt3dadd(198780.000000,136200.000000,82575.000000,6.449724)}

{create adhoc48}
{access adhoc48}
{connect adhoc48(1), adhoc46(0)}
{nseg = 1}
{strdef color color = "White"}
{pt3dclear()}
{pt3dadd(198360.000000,138432.000000,78100.000000,31.947992)}
{pt3dadd(198288.000000,138132.000000,78000.000000,21.798661)}
{pt3dadd(198288.000000,137724.000000,78050.000000,13.679197)}
{pt3dadd(198120.000000,137436.000000,77825.000000,11.911704)}
{pt3dadd(198048.000000,137112.000000,77875.000000,5.822105)}
{pt3dadd(197976.000000,136920.000000,77850.000000,5.822105)}
{pt3dadd(197904.000000,136644.000000,77750.000000,5.822105)}
{pt3dadd(197844.000000,136416.000000,77675.000000,11.068632)}
{pt3dadd(197772.000000,136188.000000,77675.000000,6.746526)}
{pt3dadd(197712.000000,136032.000000,77650.000000,6.746526)}
{pt3dadd(197664.000000,135804.000000,77650.000000,6.746526)}
{pt3dadd(197520.000000,135468.000000,77500.000000,11.993053)}
{pt3dadd(197448.000000,135168.000000,77475.000000,6.746526)}
{pt3dadd(197268.000000,134928.000000,77550.000000,6.746526)}
{pt3dadd(197004.000000,134412.000000,77450.000000,6.746526)}
{pt3dadd(196920.000000,133824.000000,77275.000000,10.298281)}
{pt3dadd(196812.000000,133416.000000,77175.000000,5.051754)}
{pt3dadd(196488.000000,133008.000000,77050.000000,5.051754)}
{pt3dadd(196260.000000,132660.000000,76975.000000,5.051754)}
{pt3dadd(196176.000000,132324.000000,76900.000000,10.298281)}
{pt3dadd(196080.000000,131988.000000,76750.000000,13.102358)}
{pt3dadd(196008.000000,131712.000000,76875.000000,20.837264)}
{pt3dadd(195840.000000,131448.000000,76850.000000,33.279160)}

{create adhoc49}
{access adhoc49}
{connect adhoc49(1), adhoc48(0)}
{nseg = 1}
{strdef color color = "White"}
{pt3dclear()}
{pt3dadd(195840.000000,131448.000000,76850.000000,33.279160)}
{pt3dadd(195648.000000,131448.000000,75600.000000,18.012644)}
{pt3dadd(195420.000000,131388.000000,75225.000000,11.407586)}
{pt3dadd(195240.000000,131268.000000,75000.000000,7.319591)}
{pt3dadd(194856.000000,130896.000000,74750.000000,3.767836)}
{pt3dadd(194496.000000,130656.000000,74475.000000,3.767836)}
{pt3dadd(194304.000000,130512.000000,74300.000000,3.767836)}
{pt3dadd(193656.000000,130200.000000,74025.000000,7.319591)}
{pt3dadd(193248.000000,129852.000000,73725.000000,5.051754)}
{pt3dadd(193056.000000,129504.000000,73350.000000,5.051754)}
{pt3dadd(192996.000000,129168.000000,73100.000000,5.051754)}
{pt3dadd(192864.000000,128868.000000,72750.000000,6.609275)}
{pt3dadd(192744.000000,128292.000000,72350.000000,3.057520)}
{pt3dadd(192648.000000,128064.000000,72075.000000,3.057520)}
{pt3dadd(192516.000000,127896.000000,71725.000000,3.057520)}
{pt3dadd(192300.000000,127716.000000,71200.000000,5.432350)}
{pt3dadd(192144.000000,127428.000000,70800.000000,3.874829)}
{pt3dadd(191928.000000,127260.000000,70550.000000,3.874829)}
{pt3dadd(191616.000000,127068.000000,70250.000000,5.432350)}
{pt3dadd(191388.000000,127056.000000,70050.000000,5.878846)}
{pt3dadd(191124.000000,127008.000000,69875.000000,4.840027)}
{pt3dadd(190908.000000,127104.000000,69875.000000,3.732480)}

{create adhoc50}
{access adhoc50}
{connect adhoc50(1), adhoc48(0)}
{nseg = 1}
{strdef color color = "White"}
{pt3dclear()}
{pt3dadd(195840.000000,131448.000000,76850.000000,33.279160)}
{pt3dadd(195756.000000,131184.000000,77150.000000,19.296562)}
{pt3dadd(195684.000000,130908.000000,77175.000000,12.177937)}
{pt3dadd(195648.000000,130692.000000,77275.000000,10.144211)}
{pt3dadd(195648.000000,130464.000000,77375.000000,5.822105)}
{pt3dadd(195648.000000,130248.000000,77475.000000,5.822105)}
{pt3dadd(195648.000000,129996.000000,77425.000000,5.822105)}
{pt3dadd(195600.000000,129768.000000,77425.000000,10.144211)}
{pt3dadd(195492.000000,129540.000000,77425.000000,5.822105)}
{pt3dadd(195480.000000,129276.000000,77425.000000,5.822105)}
{pt3dadd(195468.000000,129132.000000,77425.000000,5.822105)}
{pt3dadd(195396.000000,128856.000000,77500.000000,10.846771)}
{pt3dadd(195360.000000,128628.000000,77550.000000,6.524665)}
{pt3dadd(195336.000000,128424.000000,77575.000000,6.524665)}
{pt3dadd(195336.000000,128172.000000,77575.000000,6.524665)}
{pt3dadd(195312.000000,127896.000000,77575.000000,11.771192)}
{pt3dadd(195240.000000,127536.000000,77600.000000,6.746526)}
{pt3dadd(195072.000000,127212.000000,77650.000000,6.746526)}
{pt3dadd(194952.000000,127032.000000,77700.000000,6.746526)}
{pt3dadd(194976.000000,126828.000000,77750.000000,11.993053)}
{pt3dadd(194928.000000,126600.000000,77800.000000,6.746526)}
{pt3dadd(194916.000000,126276.000000,77825.000000,6.746526)}
{pt3dadd(194904.000000,126072.000000,77925.000000,6.746526)}
{pt3dadd(194820.000000,125796.000000,77975.000000,11.771192)}
{pt3dadd(194796.000000,125532.000000,78050.000000,6.524665)}
{pt3dadd(194772.000000,125244.000000,78125.000000,11.771192)}
{pt3dadd(194532.000000,124848.000000,78250.000000,16.795857)}
{pt3dadd(194472.000000,124596.000000,78325.000000,18.618653)}
{pt3dadd(194532.000000,123984.000000,78375.000000,26.623327)}

{create adhoc51}
{access adhoc51}
{connect adhoc51(1), adhoc50(0)}
{nseg = 1}
{strdef color color = "White"}
{pt3dclear()}
{pt3dadd(194532.000000,123984.000000,78375.000000,26.623327)}
{pt3dadd(194544.000000,123624.000000,78250.000000,15.537250)}
{pt3dadd(194652.000000,123408.000000,78150.000000,9.922350)}
{pt3dadd(194592.000000,123168.000000,78125.000000,8.449439)}
{pt3dadd(194580.000000,122928.000000,78075.000000,5.051754)}
{pt3dadd(194580.000000,122292.000000,78050.000000,5.051754)}
{pt3dadd(194580.000000,121944.000000,78100.000000,5.051754)}
{pt3dadd(194496.000000,121356.000000,78175.000000,8.603509)}
{pt3dadd(194532.000000,121092.000000,78150.000000,5.051754)}
{pt3dadd(194520.000000,120756.000000,78225.000000,5.051754)}
{pt3dadd(194532.000000,120504.000000,78275.000000,8.603509)}
{pt3dadd(194508.000000,120252.000000,78300.000000,12.155263)}
{pt3dadd(194472.000000,119976.000000,78375.000000,13.339181)}
{pt3dadd(194412.000000,119772.000000,78425.000000,19.258772)}

{create adhoc52}
{access adhoc52}
{connect adhoc52(1), adhoc51(0)}
{nseg = 1}
{strdef color color = "White"}
{pt3dclear()}
{pt3dadd(194412.000000,119772.000000,78425.000000,19.258772)}
{pt3dadd(194460.000000,119460.000000,78375.000000,12.269250)}
{pt3dadd(194532.000000,119232.000000,78425.000000,7.961550)}
{pt3dadd(194568.000000,118908.000000,78400.000000,8.731901)}
{pt3dadd(194604.000000,118644.000000,78375.000000,5.822105)}
{pt3dadd(194544.000000,118428.000000,78400.000000,5.822105)}
{pt3dadd(194520.000000,118224.000000,78400.000000,5.822105)}
{pt3dadd(194448.000000,118020.000000,78325.000000,9.373860)}
{pt3dadd(194412.000000,117708.000000,78375.000000,5.051754)}
{pt3dadd(194376.000000,117480.000000,78500.000000,9.373860)}
{pt3dadd(194220.000000,117132.000000,78600.000000,13.511081)}
{pt3dadd(194052.000000,116832.000000,78625.000000,15.598878)}
{pt3dadd(193944.000000,116484.000000,78750.000000,22.186106)}

{create adhoc53}
{access adhoc53}
{connect adhoc53(1), adhoc52(0)}
{nseg = 1}
{strdef color color = "White"}
{pt3dclear()}
{pt3dadd(193944.000000,116484.000000,78750.000000,22.186106)}
{pt3dadd(193764.000000,116232.000000,78975.000000,14.314959)}
{pt3dadd(193560.000000,115980.000000,79150.000000,16.138415)}
{pt3dadd(193368.000000,115680.000000,79200.000000,13.082399)}
{pt3dadd(193296.000000,115392.000000,79300.000000,18.488426)}

{create adhoc54}
{access adhoc54}
{connect adhoc54(1), adhoc53(0)}
{nseg = 1}
{strdef color color = "White"}
{pt3dclear()}
{pt3dadd(193296.000000,115392.000000,79300.000000,18.488426)}
{pt3dadd(193224.000000,115032.000000,79650.000000,13.082399)}
{pt3dadd(193164.000000,114228.000000,80075.000000,8.449440)}
{pt3dadd(193092.000000,113700.000000,80425.000000,7.961550)}
{pt3dadd(192996.000000,113208.000000,80750.000000,4.409795)}
{pt3dadd(192852.000000,112680.000000,81050.000000,4.409795)}
{pt3dadd(192876.000000,112464.000000,81175.000000,4.409795)}
{pt3dadd(192924.000000,112308.000000,81300.000000,7.319591)}
{pt3dadd(192936.000000,112080.000000,81500.000000,4.409795)}
{pt3dadd(192900.000000,111864.000000,81725.000000,4.409795)}
{pt3dadd(192828.000000,111672.000000,81825.000000,4.409795)}
{pt3dadd(192696.000000,111480.000000,82025.000000,8.731901)}
{pt3dadd(192624.000000,111252.000000,82200.000000,5.822105)}
{pt3dadd(192468.000000,111084.000000,82500.000000,5.822105)}
{pt3dadd(192276.000000,110892.000000,82850.000000,5.822105)}
{pt3dadd(192156.000000,110688.000000,83075.000000,9.373860)}
{pt3dadd(192036.000000,110376.000000,83425.000000,5.051754)}
{pt3dadd(191808.000000,110160.000000,83675.000000,5.051754)}
{pt3dadd(191664.000000,109908.000000,83850.000000,10.298281)}
{pt3dadd(191664.000000,109764.000000,84050.000000,17.665799)}
{pt3dadd(191556.000000,109488.000000,84225.000000,22.523408)}
{pt3dadd(191412.000000,109236.000000,84425.000000,38.337593)}

{create adhoc55}
{access adhoc55}
{connect adhoc55(1), adhoc54(0)}
{nseg = 1}
{strdef color color = "White"}
{pt3dclear()}
{pt3dadd(191412.000000,109236.000000,84425.000000,38.337593)}
{pt3dadd(191088.000000,109152.000000,84350.000000,19.698788)}
{pt3dadd(190812.000000,108768.000000,84175.000000,12.419273)}
{pt3dadd(190620.000000,108516.000000,84050.000000,7.319591)}
{pt3dadd(190164.000000,108144.000000,84000.000000,3.767836)}
{pt3dadd(190008.000000,107820.000000,83925.000000,3.767836)}
{pt3dadd(189888.000000,107592.000000,83975.000000,3.767836)}
{pt3dadd(189288.000000,107088.000000,83975.000000,5.015770)}
{pt3dadd(189072.000000,106872.000000,83925.000000,2.747934)}
{pt3dadd(188868.000000,106668.000000,83925.000000,2.747934)}
{pt3dadd(188568.000000,106152.000000,83650.000000,7.070039)}
{pt3dadd(188448.000000,106008.000000,83375.000000,11.207260)}
{pt3dadd(187860.000000,105744.000000,83175.000000,15.598878)}
{pt3dadd(187704.000000,105612.000000,83200.000000,22.186106)}

{create adhoc56}
{access adhoc56}
{connect adhoc56(1), adhoc54(0)}
{nseg = 1}
{strdef color color = "White"}
{pt3dclear()}
{pt3dadd(191412.000000,109236.000000,84425.000000,38.337593)}
{pt3dadd(191412.000000,109236.000000,86125.000000,19.698788)}
{pt3dadd(191556.000000,109092.000000,86625.000000,12.419273)}
{pt3dadd(191688.000000,109092.000000,87225.000000,10.298281)}
{pt3dadd(191748.000000,109164.000000,87525.000000,10.298281)}
{pt3dadd(191700.000000,109260.000000,87925.000000,16.163801)}
{pt3dadd(191736.000000,109320.000000,88250.000000,19.258772)}

{create adhoc57}
{access adhoc57}
{connect adhoc57(1), adhoc56(0)}
{nseg = 1}
{strdef color color = "White"}
{pt3dclear()}
{pt3dadd(191736.000000,109320.000000,88250.000000,19.258772)}
{pt3dadd(191880.000000,110352.000000,88700.000000,10.634632)}
{pt3dadd(191868.000000,111408.000000,89000.000000,6.980779)}
{pt3dadd(191892.000000,112164.000000,89275.000000,5.358049)}
{pt3dadd(191952.000000,112596.000000,89250.000000,3.429025)}
{pt3dadd(192000.000000,112968.000000,89325.000000,3.429025)}
{pt3dadd(191928.000000,113448.000000,89250.000000,4.676958)}
{pt3dadd(191784.000000,113760.000000,88950.000000,6.234479)}
{pt3dadd(191916.000000,114048.000000,89125.000000,6.175757)}
{pt3dadd(191784.000000,113820.000000,88550.000000,9.287602)}

{create adhoc58}
{access adhoc58}
{connect adhoc58(1), adhoc56(0)}
{nseg = 1}
{strdef color color = "White"}
{pt3dclear()}
{pt3dadd(191736.000000,109320.000000,88250.000000,19.258772)}
{pt3dadd(191316.000000,108744.000000,88625.000000,12.269250)}
{pt3dadd(191244.000000,108792.000000,88850.000000,7.961550)}
{pt3dadd(191088.000000,108708.000000,89225.000000,8.547017)}
{pt3dadd(190740.000000,108564.000000,89725.000000,5.637221)}
{pt3dadd(190572.000000,108528.000000,89975.000000,5.637221)}
{pt3dadd(190404.000000,108588.000000,90250.000000,5.637221)}
{pt3dadd(190452.000000,108612.000000,90600.000000,7.194742)}
{pt3dadd(190356.000000,108564.000000,90825.000000,3.057520)}
{pt3dadd(190236.000000,108432.000000,91100.000000,3.504016)}
{pt3dadd(190200.000000,108276.000000,91450.000000,4.278970)}
{pt3dadd(190020.000000,108120.000000,91450.000000,3.535750)}
{pt3dadd(189852.000000,107928.000000,91450.000000,5.374770)}

{create adhoc59}
{access adhoc59}
{connect adhoc59(1), adhoc53(0)}
{nseg = 1}
{strdef color color = "White"}
{pt3dclear()}
{pt3dadd(193296.000000,115392.000000,79300.000000,18.488426)}
{pt3dadd(192288.000000,115356.000000,78350.000000,10.377850)}
{pt3dadd(192252.000000,115272.000000,78125.000000,6.826710)}
{pt3dadd(192156.000000,115332.000000,78175.000000,4.986545)}
{pt3dadd(191892.000000,115308.000000,78200.000000,4.047465)}
{pt3dadd(191796.000000,115320.000000,78200.000000,4.643260)}
{pt3dadd(191592.000000,115380.000000,78175.000000,6.738767)}
{pt3dadd(191460.000000,115440.000000,78200.000000,4.478975)}

{create adhoc60}
{access adhoc60}
{connect adhoc60(1), adhoc52(0)}
{nseg = 1}
{strdef color color = "White"}
{pt3dclear()}
{pt3dadd(193944.000000,116484.000000,78750.000000,22.186106)}
{pt3dadd(194064.000000,116388.000000,78125.000000,10.475258)}
{pt3dadd(194148.000000,116172.000000,77875.000000,10.371700)}
{pt3dadd(194160.000000,116040.000000,77750.000000,7.310908)}
{pt3dadd(194016.000000,115860.000000,77550.000000,11.145123)}

{create adhoc61}
{access adhoc61}
{connect adhoc61(1), adhoc51(0)}
{nseg = 1}
{strdef color color = "White"}
{pt3dclear()}
{pt3dadd(194412.000000,119772.000000,78425.000000,19.258772)}
{pt3dadd(194580.000000,119772.000000,79050.000000,10.719407)}
{pt3dadd(194676.000000,119664.000000,79250.000000,6.879706)}
{pt3dadd(194676.000000,119640.000000,79500.000000,7.739669)}

{create adhoc62}
{access adhoc62}
{connect adhoc62(1), adhoc50(0)}
{nseg = 1}
{strdef color color = "White"}
{pt3dclear()}
{pt3dadd(194532.000000,123984.000000,78375.000000,26.623327)}
{pt3dadd(194436.000000,123984.000000,79325.000000,13.089483)}
{pt3dadd(194448.000000,123960.000000,79550.000000,8.453690)}
{pt3dadd(194496.000000,123840.000000,79700.000000,4.986545)}
{pt3dadd(194496.000000,123768.000000,79900.000000,3.057520)}
{pt3dadd(194508.000000,123696.000000,80150.000000,3.057520)}
{pt3dadd(194568.000000,123516.000000,80475.000000,3.057520)}
{pt3dadd(194628.000000,123444.000000,80750.000000,5.432350)}
{pt3dadd(194880.000000,123672.000000,81250.000000,3.874829)}
{pt3dadd(195156.000000,123852.000000,81525.000000,3.874829)}
{pt3dadd(195324.000000,124020.000000,81775.000000,3.874829)}
{pt3dadd(195660.000000,124404.000000,82075.000000,5.803854)}
{pt3dadd(195720.000000,124584.000000,82300.000000,3.429025)}
{pt3dadd(195780.000000,124812.000000,82550.000000,3.429025)}
{pt3dadd(196032.000000,125160.000000,82800.000000,3.429025)}
{pt3dadd(196236.000000,125616.000000,82975.000000,4.676958)}
{pt3dadd(196368.000000,125652.000000,83100.000000,3.737879)}
{pt3dadd(196464.000000,125796.000000,83100.000000,5.229798)}
{pt3dadd(196668.000000,125940.000000,83150.000000,6.449724)}

{create adhoc63}
{access adhoc63}
{connect adhoc63(1), adhoc15(0)}
{nseg = 1}
{strdef color color = "White"}
{pt3dclear()}
{pt3dadd(198924.000000,165420.000000,76975.000000,52.997890)}
{pt3dadd(198072.000000,165420.000000,77200.000000,23.515622)}
{pt3dadd(198000.000000,165420.000000,77525.000000,14.709373)}
{pt3dadd(197880.000000,165420.000000,77825.000000,5.399740)}
{pt3dadd(197688.000000,165420.000000,78000.000000,2.489945)}
{pt3dadd(197256.000000,165252.000000,78225.000000,2.489945)}
{pt3dadd(196980.000000,165096.000000,78350.000000,2.489945)}
{pt3dadd(196776.000000,164904.000000,78450.000000,3.479890)}
{pt3dadd(196560.000000,164640.000000,78525.000000,2.489945)}
{pt3dadd(196416.000000,164520.000000,78550.000000,2.489945)}
{pt3dadd(196248.000000,164100.000000,78725.000000,2.489945)}
{pt3dadd(196080.000000,163728.000000,78725.000000,3.737879)}
{pt3dadd(195972.000000,163596.000000,78775.000000,2.747934)}
{pt3dadd(195792.000000,163332.000000,78825.000000,2.747934)}
{pt3dadd(195672.000000,163296.000000,78850.000000,2.747934)}
{pt3dadd(195264.000000,163188.000000,78850.000000,3.995868)}
{pt3dadd(194988.000000,163092.000000,78850.000000,2.747934)}
{pt3dadd(194748.000000,163056.000000,78750.000000,2.747934)}
{pt3dadd(194568.000000,163092.000000,78675.000000,2.747934)}
{pt3dadd(194352.000000,163128.000000,78525.000000,5.657729)}
{pt3dadd(194196.000000,163116.000000,78450.000000,4.409795)}
{pt3dadd(194064.000000,163140.000000,78400.000000,4.409795)}
{pt3dadd(193884.000000,163080.000000,78325.000000,4.409795)}
{pt3dadd(193668.000000,162972.000000,78275.000000,5.184749)}
{pt3dadd(193476.000000,162996.000000,78525.000000,2.274954)}
{pt3dadd(193368.000000,162996.000000,78550.000000,2.274954)}
{pt3dadd(193164.000000,162996.000000,78600.000000,2.274954)}
{pt3dadd(193008.000000,162984.000000,78600.000000,3.522888)}
{pt3dadd(192840.000000,163020.000000,78650.000000,2.747934)}
{pt3dadd(192648.000000,163032.000000,78750.000000,2.747934)}
{pt3dadd(192504.000000,162972.000000,78825.000000,2.747934)}
{pt3dadd(192336.000000,162996.000000,78875.000000,3.343729)}
{pt3dadd(192228.000000,163068.000000,78875.000000,2.095795)}
{pt3dadd(191988.000000,163188.000000,78875.000000,2.095795)}
{pt3dadd(191604.000000,163272.000000,78875.000000,2.095795)}
{pt3dadd(191196.000000,163248.000000,78875.000000,4.024820)}
{pt3dadd(191016.000000,163116.000000,78775.000000,3.429025)}
{pt3dadd(190800.000000,163020.000000,78825.000000,3.429025)}
{pt3dadd(190596.000000,162936.000000,78825.000000,3.429025)}
{pt3dadd(190284.000000,162324.000000,78825.000000,5.358049)}
{pt3dadd(189936.000000,162132.000000,78850.000000,3.429025)}
{pt3dadd(189696.000000,162084.000000,78700.000000,3.429025)}
{pt3dadd(189924.000000,162240.000000,78400.000000,3.429025)}
{pt3dadd(189288.000000,162096.000000,78125.000000,4.986545)}
{pt3dadd(189072.000000,162012.000000,78150.000000,3.057520)}
{pt3dadd(188856.000000,161892.000000,78175.000000,3.057520)}
{pt3dadd(188616.000000,161832.000000,78150.000000,3.057520)}
{pt3dadd(188220.000000,161772.000000,78150.000000,4.615041)}
{pt3dadd(188004.000000,161736.000000,78175.000000,3.057520)}
{pt3dadd(187692.000000,161676.000000,78000.000000,3.057520)}
{pt3dadd(187452.000000,161676.000000,78025.000000,3.057520)}
{pt3dadd(187092.000000,161748.000000,77925.000000,5.967316)}
{pt3dadd(186900.000000,161748.000000,77875.000000,4.409795)}
{pt3dadd(186312.000000,161640.000000,77700.000000,4.409795)}
{pt3dadd(186108.000000,161580.000000,77825.000000,4.409795)}
{pt3dadd(185868.000000,161592.000000,77850.000000,5.967316)}
{pt3dadd(185652.000000,161628.000000,77700.000000,3.057520)}
{pt3dadd(185496.000000,161616.000000,77650.000000,3.057520)}
{pt3dadd(185304.000000,161472.000000,77625.000000,3.057520)}
{pt3dadd(184476.000000,161460.000000,77650.000000,4.986545)}
{pt3dadd(184200.000000,161424.000000,77675.000000,3.429025)}
{pt3dadd(183972.000000,161436.000000,77600.000000,3.429025)}
{pt3dadd(183720.000000,161328.000000,77550.000000,3.429025)}
{pt3dadd(183420.000000,161388.000000,77575.000000,5.358049)}
{pt3dadd(183144.000000,161400.000000,77575.000000,3.429025)}
{pt3dadd(182880.000000,161400.000000,77575.000000,3.429025)}
{pt3dadd(182460.000000,161388.000000,77525.000000,3.429025)}
{pt3dadd(182076.000000,161376.000000,77500.000000,5.358049)}
{pt3dadd(181764.000000,161448.000000,77500.000000,3.429025)}
{pt3dadd(181500.000000,161520.000000,77525.000000,3.429025)}
{pt3dadd(181224.000000,161616.000000,77575.000000,3.429025)}
{pt3dadd(180960.000000,161664.000000,77575.000000,5.803854)}
{pt3dadd(180720.000000,161664.000000,77525.000000,3.874829)}
{pt3dadd(180480.000000,161652.000000,77425.000000,3.874829)}
{pt3dadd(180288.000000,161616.000000,77400.000000,3.874829)}
{pt3dadd(180096.000000,161664.000000,77250.000000,4.864774)}
{pt3dadd(179760.000000,161628.000000,77075.000000,2.489945)}
{pt3dadd(179484.000000,161544.000000,76925.000000,2.489945)}
{pt3dadd(179268.000000,161472.000000,76700.000000,2.489945)}
{pt3dadd(179004.000000,161304.000000,76550.000000,3.737879)}
{pt3dadd(178644.000000,161124.000000,76300.000000,2.747934)}
{pt3dadd(178272.000000,160860.000000,76100.000000,2.747934)}
{pt3dadd(177504.000000,160536.000000,75850.000000,2.747934)}
{pt3dadd(177216.000000,160344.000000,75825.000000,4.676958)}
{pt3dadd(176760.000000,160092.000000,75200.000000,3.429025)}
{pt3dadd(176208.000000,159756.000000,74675.000000,3.429025)}
{pt3dadd(175764.000000,159492.000000,74325.000000,3.429025)}
{pt3dadd(175296.000000,159168.000000,73875.000000,4.986545)}
{pt3dadd(174876.000000,158688.000000,73225.000000,3.057520)}
{pt3dadd(174492.000000,158124.000000,72375.000000,3.057520)}
{pt3dadd(173988.000000,157608.000000,71550.000000,3.057520)}
{pt3dadd(173328.000000,157008.000000,70700.000000,4.305454)}
{pt3dadd(172224.000000,156828.000000,69850.000000,2.747934)}
{pt3dadd(171804.000000,156696.000000,69250.000000,2.747934)}
{pt3dadd(171060.000000,156444.000000,68650.000000,2.747934)}
{pt3dadd(170268.000000,156156.000000,67775.000000,3.343729)}
{pt3dadd(169356.000000,155784.000000,66850.000000,2.095795)}
{pt3dadd(168540.000000,155508.000000,66150.000000,2.095795)}
{pt3dadd(168360.000000,155496.000000,66025.000000,2.095795)}
{pt3dadd(168252.000000,155460.000000,65875.000000,2.691590)}
{pt3dadd(168096.000000,155460.000000,65725.000000,2.095795)}
{pt3dadd(167784.000000,155400.000000,65450.000000,2.095795)}
{pt3dadd(167256.000000,155280.000000,65075.000000,2.095795)}
{pt3dadd(167100.000000,155244.000000,64800.000000,2.691590)}
{pt3dadd(166848.000000,155208.000000,64600.000000,2.095795)}
{pt3dadd(166548.000000,155148.000000,64350.000000,2.095795)}
{pt3dadd(165576.000000,154884.000000,63450.000000,2.095795)}
{pt3dadd(164496.000000,154596.000000,62700.000000,2.691590)}
{pt3dadd(163476.000000,154380.000000,61900.000000,2.095795)}
{pt3dadd(163176.000000,154200.000000,61600.000000,2.095795)}
{pt3dadd(162984.000000,154068.000000,61475.000000,2.095795)}
{pt3dadd(162696.000000,154020.000000,61300.000000,2.691590)}
{pt3dadd(162324.000000,153948.000000,61100.000000,2.095795)}
{pt3dadd(162276.000000,153948.000000,61100.000000,2.095795)}
{pt3dadd(161976.000000,153876.000000,60925.000000,2.095795)}
{pt3dadd(161400.000000,153756.000000,60575.000000,3.085740)}
{pt3dadd(161172.000000,153696.000000,60375.000000,3.085740)}
{pt3dadd(161052.000000,153636.000000,60200.000000,4.142900)}
{pt3dadd(160872.000000,153588.000000,60150.000000,4.478975)}

{create adhoc64}
{access adhoc64}
{connect adhoc64(1), adhoc14(0)}
{nseg = 1}
{strdef color color = "White"}
{pt3dclear()}
{pt3dadd(198636.000000,167544.000000,77000.000000,38.337593)}
{pt3dadd(197808.000000,167544.000000,77825.000000,16.375065)}
{pt3dadd(197700.000000,167436.000000,78050.000000,10.425039)}
{pt3dadd(197484.000000,167268.000000,78375.000000,3.832474)}
{pt3dadd(197496.000000,167196.000000,78600.000000,2.274954)}
{pt3dadd(197232.000000,167208.000000,78400.000000,2.274954)}
{pt3dadd(197604.000000,167184.000000,79075.000000,3.832474)}
{pt3dadd(197484.000000,167004.000000,79375.000000,4.278970)}
{pt3dadd(197484.000000,167004.000000,79550.000000,4.840027)}
{pt3dadd(197364.000000,166788.000000,79775.000000,3.732480)}

{create adhoc65}
{access adhoc65}
{connect adhoc65(1), adhoc13(0)}
{nseg = 1}
{strdef color color = "White"}
{pt3dclear()}
{pt3dadd(194928.000000,174552.000000,74150.000000,57.506386)}
{pt3dadd(194928.000000,172848.000000,71650.000000,37.287448)}
{pt3dadd(194532.000000,172512.000000,71000.000000,27.732632)}

{create adhoc66}
{access adhoc66}
{connect adhoc66(1), adhoc65(0)}
{nseg = 1}
{strdef color color = "White"}
{pt3dclear()}
{pt3dadd(194532.000000,172512.000000,71000.000000,27.732632)}
{pt3dadd(194292.000000,172332.000000,70750.000000,20.837264)}
{pt3dadd(194208.000000,172308.000000,70325.000000,13.102358)}
{pt3dadd(193908.000000,172344.000000,69900.000000,14.211664)}
{pt3dadd(193776.000000,172488.000000,69675.000000,7.855832)}
{pt3dadd(193560.000000,172464.000000,69325.000000,12.177937)}
{pt3dadd(193092.000000,172500.000000,68850.000000,12.952891)}
{pt3dadd(192696.000000,172500.000000,68525.000000,9.995099)}
{pt3dadd(192492.000000,172668.000000,68475.000000,5.374770)}

{create adhoc67}
{access adhoc67}
{connect adhoc67(1), adhoc66(0)}
{nseg = 1}
{strdef color color = "White"}
{pt3dclear()}
{pt3dadd(192492.000000,172668.000000,68475.000000,5.374770)}
{pt3dadd(192744.000000,172164.000000,68000.000000,9.995099)}
{pt3dadd(192648.000000,171768.000000,67675.000000,6.597059)}
{pt3dadd(192288.000000,171432.000000,67350.000000,9.373860)}
{pt3dadd(191988.000000,171168.000000,67125.000000,5.051754)}
{pt3dadd(192000.000000,170820.000000,66950.000000,5.051754)}
{pt3dadd(191652.000000,170328.000000,66650.000000,5.051754)}
{pt3dadd(191160.000000,169668.000000,66275.000000,7.426584)}
{pt3dadd(191196.000000,169332.000000,66175.000000,3.874829)}
{pt3dadd(191124.000000,169128.000000,66175.000000,3.874829)}
{pt3dadd(190968.000000,169104.000000,66125.000000,9.121356)}
{pt3dadd(190800.000000,169020.000000,65950.000000,13.443461)}
{pt3dadd(190332.000000,168708.000000,65475.000000,17.447720)}
{pt3dadd(190116.000000,168252.000000,65275.000000,23.110527)}

{create adhoc68}
{access adhoc68}
{connect adhoc68(1), adhoc67(0)}
{nseg = 1}
{strdef color color = "White"}
{pt3dclear()}
{pt3dadd(190116.000000,168252.000000,65275.000000,23.110527)}
{pt3dadd(190188.000000,166428.000000,65375.000000,12.661558)}
{pt3dadd(190188.000000,165600.000000,65300.000000,8.196935)}
{pt3dadd(190188.000000,165168.000000,65050.000000,8.196935)}
{pt3dadd(189972.000000,164184.000000,65450.000000,5.822105)}
{pt3dadd(189720.000000,163008.000000,65325.000000,5.822105)}
{pt3dadd(189696.000000,162504.000000,65150.000000,5.822105)}
{pt3dadd(189648.000000,161724.000000,64800.000000,7.379626)}
{pt3dadd(189540.000000,161220.000000,64400.000000,4.305454)}
{pt3dadd(189096.000000,160740.000000,63875.000000,5.553388)}
{pt3dadd(188700.000000,160344.000000,63400.000000,8.255647)}
{pt3dadd(188604.000000,160260.000000,63050.000000,7.739669)}

{create adhoc69}
{access adhoc69}
{connect adhoc69(1), adhoc67(0)}
{nseg = 1}
{strdef color color = "White"}
{pt3dclear()}
{pt3dadd(190116.000000,168252.000000,65275.000000,23.110527)}
{pt3dadd(189960.000000,168372.000000,64875.000000,14.514417)}
{pt3dadd(189492.000000,168144.000000,64500.000000,9.287602)}

{create adhoc70}
{access adhoc70}
{connect adhoc70(1), adhoc66(0)}
{nseg = 1}
{strdef color color = "White"}
{pt3dclear()}
{pt3dadd(192492.000000,172668.000000,68475.000000,5.374770)}
{pt3dadd(191796.000000,172896.000000,68325.000000,4.871480)}
{pt3dadd(191724.000000,172920.000000,68225.000000,3.522888)}
{pt3dadd(191592.000000,173004.000000,68050.000000,5.122763)}
{pt3dadd(191448.000000,173160.000000,67750.000000,3.874829)}
{pt3dadd(191352.000000,173124.000000,67700.000000,3.874829)}
{pt3dadd(191184.000000,173268.000000,67650.000000,3.874829)}
{pt3dadd(191028.000000,173280.000000,67525.000000,5.122763)}
{pt3dadd(190824.000000,173436.000000,67475.000000,2.747934)}
{pt3dadd(190644.000000,173484.000000,67450.000000,2.747934)}
{pt3dadd(190704.000000,173712.000000,67275.000000,2.747934)}
{pt3dadd(190452.000000,174024.000000,67075.000000,3.737879)}
{pt3dadd(190380.000000,174300.000000,66975.000000,2.489945)}
{pt3dadd(190284.000000,174276.000000,66975.000000,2.489945)}
{pt3dadd(190404.000000,174468.000000,67000.000000,2.489945)}
{pt3dadd(190512.000000,174612.000000,66900.000000,3.264899)}
{pt3dadd(190548.000000,174876.000000,67025.000000,2.274954)}
{pt3dadd(190464.000000,175080.000000,67025.000000,2.274954)}
{pt3dadd(190356.000000,175464.000000,67175.000000,3.832474)}
{pt3dadd(190176.000000,175992.000000,67475.000000,4.822419)}
{pt3dadd(190020.000000,176160.000000,67550.000000,5.745775)}
{pt3dadd(189816.000000,176100.000000,67625.000000,6.449724)}

{create adhoc71}
{access adhoc71}
{connect adhoc71(1), adhoc65(0)}
{nseg = 1}
{strdef color color = "White"}
{pt3dclear()}
{pt3dadd(194532.000000,172512.000000,71000.000000,27.732632)}
{pt3dadd(193644.000000,171240.000000,71225.000000,12.716243)}
{pt3dadd(193476.000000,170844.000000,71300.000000,8.229746)}
{pt3dadd(193272.000000,170580.000000,71350.000000,4.912244)}
{pt3dadd(192996.000000,170316.000000,71525.000000,4.986545)}
{pt3dadd(192240.000000,168960.000000,71500.000000,8.538299)}
{pt3dadd(192072.000000,168288.000000,71500.000000,13.230499)}
{pt3dadd(192480.000000,169440.000000,71950.000000,19.258772)}

{create adhoc72}
{access adhoc72}
{connect adhoc72(1), adhoc12(0)}
{nseg = 1}
{strdef color color = "White"}
{pt3dclear()}
{pt3dadd(193200.000000,180504.000000,72825.000000,46.005108)}
{pt3dadd(190920.000000,180576.000000,73125.000000,18.414926)}
{pt3dadd(190752.000000,180444.000000,73200.000000,11.648955)}
{pt3dadd(190404.000000,180468.000000,73125.000000,3.995868)}
{pt3dadd(190164.000000,180468.000000,73150.000000,2.747934)}
{pt3dadd(189924.000000,180708.000000,73600.000000,2.747934)}
{pt3dadd(189732.000000,180912.000000,73750.000000,2.747934)}
{pt3dadd(189708.000000,181212.000000,73975.000000,4.676958)}
{pt3dadd(189648.000000,181464.000000,74225.000000,3.429025)}
{pt3dadd(189444.000000,181872.000000,74450.000000,3.429025)}
{pt3dadd(189360.000000,182196.000000,74650.000000,4.418969)}
{pt3dadd(189444.000000,182436.000000,74900.000000,5.408914)}
{pt3dadd(189744.000000,182448.000000,74850.000000,4.799816)}
{pt3dadd(189984.000000,182496.000000,74900.000000,6.449724)}

{create adhoc73}
{access adhoc73}
{connect adhoc73(1), adhoc11(0)}
{nseg = 1}
{strdef color color = "White"}
{pt3dclear()}
{pt3dadd(193020.000000,185616.000000,73700.000000,55.206127)}
{pt3dadd(189636.000000,186372.000000,70900.000000,32.213706)}
{pt3dadd(189792.000000,186036.000000,70575.000000,29.835810)}
{pt3dadd(189660.000000,186108.000000,70250.000000,18.012644)}
{pt3dadd(189540.000000,186288.000000,69950.000000,19.258772)}

{create adhoc74}
{access adhoc74}
{connect adhoc74(1), adhoc73(0)}
{nseg = 1}
{strdef color color = "White"}
{pt3dclear()}
{pt3dadd(189540.000000,186288.000000,69950.000000,19.258772)}
{pt3dadd(189084.000000,186648.000000,69425.000000,18.696897)}
{pt3dadd(187404.000000,187128.000000,68550.000000,11.818138)}
{pt3dadd(186576.000000,187572.000000,68025.000000,12.588489)}
{pt3dadd(186252.000000,187932.000000,67475.000000,11.068632)}
{pt3dadd(185496.000000,188304.000000,67000.000000,17.447720)}
{pt3dadd(185016.000000,188676.000000,66550.000000,27.732632)}

{create adhoc75}
{access adhoc75}
{connect adhoc75(1), adhoc74(0)}
{nseg = 1}
{strdef color color = "White"}
{pt3dclear()}
{pt3dadd(185016.000000,188676.000000,66550.000000,27.732632)}
{pt3dadd(183996.000000,189564.000000,67125.000000,14.202260)}
{pt3dadd(184128.000000,189552.000000,67350.000000,9.121356)}
{pt3dadd(183936.000000,189780.000000,67650.000000,5.432350)}
{pt3dadd(183852.000000,189984.000000,67875.000000,3.057520)}
{pt3dadd(183828.000000,190116.000000,68100.000000,3.832474)}
{pt3dadd(183648.000000,190260.000000,68300.000000,5.080408)}
{pt3dadd(183528.000000,190308.000000,68300.000000,4.871480)}
{pt3dadd(183396.000000,190320.000000,68300.000000,7.739669)}

{create adhoc76}
{access adhoc76}
{connect adhoc76(1), adhoc74(0)}
{nseg = 1}
{strdef color color = "White"}
{pt3dclear()}
{pt3dadd(185016.000000,188676.000000,66550.000000,27.732632)}
{pt3dadd(183120.000000,189900.000000,66825.000000,11.894119)}
{pt3dadd(182820.000000,190092.000000,66850.000000,7.736471)}
{pt3dadd(182568.000000,190140.000000,66850.000000,4.418969)}
{pt3dadd(182328.000000,190248.000000,66750.000000,3.429025)}
{pt3dadd(181692.000000,190644.000000,66825.000000,4.986545)}
{pt3dadd(181488.000000,190872.000000,66825.000000,6.544065)}
{pt3dadd(181272.000000,190896.000000,66700.000000,6.691735)}
{pt3dadd(181212.000000,190896.000000,66750.000000,9.287602)}

{create adhoc77}
{access adhoc77}
{connect adhoc77(1), adhoc73(0)}
{nseg = 1}
{strdef color color = "White"}
{pt3dclear()}
{pt3dadd(189540.000000,186288.000000,69950.000000,19.258772)}
{pt3dadd(189552.000000,184428.000000,68925.000000,12.269250)}
{pt3dadd(189360.000000,183624.000000,68575.000000,7.961550)}
{pt3dadd(189180.000000,183216.000000,68250.000000,7.319591)}
{pt3dadd(189276.000000,182940.000000,67950.000000,4.409795)}
{pt3dadd(189204.000000,182556.000000,67600.000000,4.409795)}
{pt3dadd(188928.000000,182184.000000,67150.000000,4.409795)}
{pt3dadd(188844.000000,182112.000000,66900.000000,6.338820)}
{pt3dadd(188388.000000,181164.000000,67150.000000,3.429025)}
{pt3dadd(188232.000000,180336.000000,66950.000000,3.429025)}
{pt3dadd(188040.000000,180120.000000,66925.000000,3.429025)}
{pt3dadd(187764.000000,179484.000000,67075.000000,4.024820)}
{pt3dadd(187680.000000,179184.000000,67000.000000,2.691590)}
{pt3dadd(187656.000000,178992.000000,66875.000000,3.485983)}
{pt3dadd(187452.000000,178512.000000,66600.000000,4.478975)}

{create adhoc78}
{access adhoc78}
{connect adhoc78(1), adhoc10(0)}
{nseg = 1}
{strdef color color = "White"}
{pt3dclear()}
{pt3dadd(191532.000000,189432.000000,76350.000000,66.247350)}
{pt3dadd(190764.000000,188256.000000,76525.000000,26.297491)}
{pt3dadd(189876.000000,187848.000000,76525.000000,16.378495)}
{pt3dadd(189504.000000,187668.000000,76525.000000,4.024820)}
{pt3dadd(189288.000000,187596.000000,76450.000000,2.095795)}
{pt3dadd(189048.000000,187176.000000,76375.000000,2.095795)}
{pt3dadd(189012.000000,187044.000000,76350.000000,2.095795)}
{pt3dadd(188952.000000,186804.000000,76350.000000,3.653315)}
{pt3dadd(188880.000000,186564.000000,76200.000000,3.057520)}
{pt3dadd(188772.000000,186540.000000,76200.000000,3.832474)}
{pt3dadd(188784.000000,186420.000000,76000.000000,4.607428)}
{pt3dadd(188880.000000,186336.000000,75875.000000,4.083180)}
{pt3dadd(189024.000000,186360.000000,76025.000000,5.374770)}

{create adhoc79}
{access adhoc79}
{connect adhoc79(1), adhoc9(0)}
{nseg = 1}
{strdef color color = "White"}
{pt3dclear()}
{pt3dadd(190956.000000,190992.000000,77100.000000,57.506386)}
{pt3dadd(189480.000000,190884.000000,77975.000000,22.248685)}
{pt3dadd(189312.000000,190584.000000,78350.000000,13.949211)}
{pt3dadd(189240.000000,190416.000000,78650.000000,4.305454)}
{pt3dadd(189060.000000,190356.000000,78725.000000,3.057520)}
{pt3dadd(189252.000000,190212.000000,78925.000000,3.057520)}
{pt3dadd(189360.000000,190044.000000,79125.000000,3.789476)}
{pt3dadd(189660.000000,189756.000000,79375.000000,4.779421)}
{pt3dadd(189804.000000,189564.000000,79450.000000,4.369835)}
{pt3dadd(189960.000000,189360.000000,79300.000000,6.449724)}

{create adhoc80}
{access adhoc80}
{connect adhoc80(1), adhoc2(0)}
{nseg = 1}
{strdef color color = "White"}
{pt3dclear()}
{pt3dadd(189732.000000,197520.000000,81575.000000,69.007660)}
{pt3dadd(188616.000000,197520.000000,82625.000000,26.598421)}
{pt3dadd(188412.000000,197208.000000,82825.000000,16.559052)}
{pt3dadd(188340.000000,196992.000000,83100.000000,6.609275)}
{pt3dadd(188652.000000,196692.000000,83500.000000,5.051754)}
{pt3dadd(188736.000000,196596.000000,83725.000000,5.051754)}
{pt3dadd(188856.000000,196392.000000,84025.000000,5.051754)}
{pt3dadd(188988.000000,196284.000000,83975.000000,7.426584)}
{pt3dadd(189240.000000,195996.000000,84125.000000,3.874829)}
{pt3dadd(189432.000000,195840.000000,84400.000000,3.874829)}
{pt3dadd(189588.000000,195564.000000,84500.000000,3.874829)}
{pt3dadd(189840.000000,195144.000000,84925.000000,5.358049)}
{pt3dadd(189768.000000,194748.000000,85150.000000,2.983220)}
{pt3dadd(189696.000000,194436.000000,85775.000000,2.983220)}
{pt3dadd(190092.000000,193788.000000,86275.000000,2.983220)}
{pt3dadd(190392.000000,193332.000000,86600.000000,4.912244)}
{pt3dadd(190680.000000,192984.000000,86825.000000,3.429025)}
{pt3dadd(190752.000000,192792.000000,87100.000000,3.429025)}
{pt3dadd(190980.000000,192732.000000,87325.000000,3.429025)}
{pt3dadd(191160.000000,192576.000000,87525.000000,6.338820)}
{pt3dadd(191280.000000,192348.000000,87700.000000,4.409795)}
{pt3dadd(191412.000000,192288.000000,87950.000000,4.409795)}
{pt3dadd(191784.000000,191928.000000,88150.000000,4.409795)}
{pt3dadd(191976.000000,191772.000000,88375.000000,5.399740)}
{pt3dadd(192336.000000,191580.000000,88700.000000,2.489945)}
{pt3dadd(192588.000000,191292.000000,88975.000000,6.115714)}
{pt3dadd(192732.000000,191184.000000,89150.000000,7.363648)}
{pt3dadd(193044.000000,191040.000000,89350.000000,9.622838)}
{pt3dadd(193152.000000,190932.000000,89450.000000,7.739669)}

{create adhoc81}
{access adhoc81}
{connect adhoc81(1), adhoc1(0)}
{nseg = 1}
{strdef color color = "White"}
{pt3dclear()}
{pt3dadd(188472.000000,207816.000000,87125.000000,131.875690)}
{pt3dadd(188148.000000,208368.000000,86350.000000,90.248733)}
{pt3dadd(187884.000000,209040.000000,85500.000000,54.749240)}
{pt3dadd(187476.000000,209220.000000,84550.000000,48.248307)}
{pt3dadd(186984.000000,209220.000000,83775.000000,21.074205)}
{pt3dadd(186264.000000,209808.000000,83275.000000,21.074205)}
{pt3dadd(185700.000000,210144.000000,82650.000000,21.074205)}
{pt3dadd(185292.000000,211140.000000,82375.000000,37.336043)}
{pt3dadd(184740.000000,211188.000000,82075.000000,17.761838)}
{pt3dadd(184140.000000,211908.000000,81525.000000,17.761838)}
{pt3dadd(183636.000000,212088.000000,81175.000000,17.761838)}
{pt3dadd(183204.000000,212484.000000,80975.000000,28.503063)}
{pt3dadd(183036.000000,211980.000000,79950.000000,22.982451)}
{pt3dadd(182304.000000,212160.000000,79475.000000,34.183728)}
{pt3dadd(181572.000000,212448.000000,79025.000000,55.972880)}
{pt3dadd(181164.000000,212520.000000,78700.000000,57.506386)}

{create adhoc82}
{access adhoc82}
{connect adhoc82(1), adhoc81(0)}
{nseg = 1}
{strdef color color = "White"}
{pt3dclear()}
{pt3dadd(181164.000000,212520.000000,78700.000000,57.506386)}
{pt3dadd(179844.000000,211392.000000,78700.000000,22.764663)}
{pt3dadd(179508.000000,210660.000000,79025.000000,14.258798)}
{pt3dadd(179556.000000,210396.000000,79175.000000,4.986545)}
{pt3dadd(179616.000000,210360.000000,79350.000000,3.429025)}
{pt3dadd(179568.000000,210384.000000,79650.000000,3.429025)}
{pt3dadd(179400.000000,210408.000000,79800.000000,3.429025)}
{pt3dadd(179208.000000,210156.000000,80425.000000,5.358049)}
{pt3dadd(179256.000000,209844.000000,81025.000000,4.676958)}
{pt3dadd(179400.000000,209904.000000,81425.000000,6.794931)}
{pt3dadd(179628.000000,209892.000000,82000.000000,7.739669)}

{create adhoc83}
{access adhoc83}
{connect adhoc83(1), adhoc81(0)}
{nseg = 1}
{strdef color color = "White"}
{pt3dclear()}
{pt3dadd(181164.000000,212520.000000,78700.000000,57.506386)}
{pt3dadd(180396.000000,213120.000000,78350.000000,66.247350)}

{create adhoc84}
{access adhoc84}
{connect adhoc84(1), adhoc83(0)}
{nseg = 1}
{strdef color color = "White"}
{pt3dclear()}
{pt3dadd(180396.000000,213120.000000,78350.000000,66.247350)}
{pt3dadd(178920.000000,212832.000000,78700.000000,25.678317)}
{pt3dadd(178584.000000,212844.000000,78925.000000,16.996935)}
{pt3dadd(178188.000000,212964.000000,79200.000000,5.037410)}
{pt3dadd(177912.000000,213024.000000,79200.000000,4.799816)}
{pt3dadd(177480.000000,213384.000000,79000.000000,6.449724)}

{create adhoc85}
{access adhoc85}
{connect adhoc85(1), adhoc83(0)}
{nseg = 1}
{strdef color color = "White"}
{pt3dclear()}
{pt3dadd(180396.000000,213120.000000,78350.000000,66.247350)}
{pt3dadd(180204.000000,213048.000000,77575.000000,45.585003)}
{pt3dadd(179820.000000,213180.000000,77200.000000,27.951002)}
{pt3dadd(179316.000000,213384.000000,76650.000000,34.575737)}
{pt3dadd(179064.000000,213516.000000,75950.000000,21.074205)}
{pt3dadd(178440.000000,214068.000000,75175.000000,21.074205)}
{pt3dadd(178068.000000,214092.000000,74525.000000,21.074205)}
{pt3dadd(177708.000000,214428.000000,74050.000000,34.575737)}
{pt3dadd(177180.000000,214740.000000,73825.000000,26.202809)}
{pt3dadd(176724.000000,214764.000000,73125.000000,42.671349)}
{pt3dadd(175908.000000,215328.000000,72525.000000,57.506386)}

{create adhoc86}
{access adhoc86}
{connect adhoc86(1), adhoc85(0)}
{nseg = 1}
{strdef color color = "White"}
{pt3dclear()}
{pt3dadd(175908.000000,215328.000000,72525.000000,57.506386)}
{pt3dadd(175788.000000,213012.000000,72800.000000,21.460385)}
{pt3dadd(175488.000000,212664.000000,72800.000000,13.476231)}
{pt3dadd(175332.000000,212256.000000,72800.000000,5.826708)}
{pt3dadd(175176.000000,211932.000000,72800.000000,5.051754)}
{pt3dadd(175200.000000,211764.000000,72850.000000,5.051754)}
{pt3dadd(175092.000000,211464.000000,72725.000000,5.051754)}
{pt3dadd(175404.000000,211236.000000,73400.000000,6.041699)}
{pt3dadd(175932.000000,210744.000000,73775.000000,3.479890)}
{pt3dadd(176196.000000,210612.000000,74225.000000,4.799816)}
{pt3dadd(176820.000000,209436.000000,74925.000000,6.449724)}

{create adhoc87}
{access adhoc87}
{connect adhoc87(1), adhoc85(0)}
{nseg = 1}
{strdef color color = "White"}
{pt3dclear()}
{pt3dadd(175908.000000,215328.000000,72525.000000,57.506386)}
{pt3dadd(175140.000000,215316.000000,71875.000000,57.506386)}

{create adhoc88}
{access adhoc88}
{connect adhoc88(1), adhoc87(0)}
{nseg = 1}
{strdef color color = "White"}
{pt3dclear()}
{pt3dadd(175140.000000,215316.000000,71875.000000,57.506386)}
{pt3dadd(173532.000000,215316.000000,71925.000000,21.732707)}
{pt3dadd(172956.000000,215016.000000,72000.000000,13.639624)}
{pt3dadd(172920.000000,214920.000000,72325.000000,5.348142)}
{pt3dadd(172344.000000,214944.000000,71750.000000,4.409795)}
{pt3dadd(172128.000000,214968.000000,71525.000000,8.731901)}
{pt3dadd(171912.000000,214800.000000,71200.000000,9.979835)}
{pt3dadd(171936.000000,214632.000000,70775.000000,10.783399)}
{pt3dadd(171912.000000,214560.000000,70250.000000,7.739669)}

{create adhoc89}
{access adhoc89}
{connect adhoc89(1), adhoc87(0)}
{nseg = 1}
{strdef color color = "White"}
{pt3dclear()}
{pt3dadd(175140.000000,215316.000000,71875.000000,57.506386)}
{pt3dadd(173892.000000,216444.000000,71300.000000,46.167737)}
{pt3dadd(173412.000000,216636.000000,70175.000000,55.303706)}
{pt3dadd(173088.000000,216732.000000,69800.000000,46.505107)}
{pt3dadd(172752.000000,216948.000000,69525.000000,69.007660)}

{create adhoc90}
{access adhoc90}
{connect adhoc90(1), adhoc89(0)}
{nseg = 1}
{strdef color color = "White"}
{pt3dclear()}
{pt3dadd(172752.000000,216948.000000,69525.000000,69.007660)}
{pt3dadd(172752.000000,215256.000000,67700.000000,29.922144)}
{pt3dadd(172152.000000,214824.000000,67100.000000,18.553286)}
{pt3dadd(171984.000000,214476.000000,66400.000000,13.584736)}
{pt3dadd(171396.000000,214548.000000,65825.000000,17.719979)}
{pt3dadd(171696.000000,214380.000000,65200.000000,28.533299)}
{pt3dadd(171696.000000,214200.000000,64775.000000,39.934990)}

{create adhoc91}
{access adhoc91}
{connect adhoc91(1), adhoc90(0)}
{nseg = 1}
{strdef color color = "White"}
{pt3dclear()}
{pt3dadd(171696.000000,214200.000000,64775.000000,39.934990)}
{pt3dadd(171168.000000,213252.000000,64775.000000,16.907531)}
{pt3dadd(171048.000000,213036.000000,64575.000000,10.744518)}
{pt3dadd(170700.000000,213144.000000,64450.000000,3.789476)}
{pt3dadd(170568.000000,213204.000000,64500.000000,3.006910)}
{pt3dadd(170400.000000,213132.000000,64500.000000,4.011517)}
{pt3dadd(170196.000000,213132.000000,64375.000000,5.374770)}

{create adhoc92}
{access adhoc92}
{connect adhoc92(1), adhoc90(0)}
{nseg = 1}
{strdef color color = "White"}
{pt3dclear()}
{pt3dadd(171696.000000,214200.000000,64775.000000,39.934990)}
{pt3dadd(171636.000000,214140.000000,64425.000000,24.904717)}
{pt3dadd(171504.000000,213792.000000,63900.000000,20.789356)}
{pt3dadd(171480.000000,213588.000000,63550.000000,17.424464)}
{pt3dadd(171372.000000,213480.000000,63075.000000,17.447720)}
{pt3dadd(171312.000000,213216.000000,62575.000000,23.110527)}

{create adhoc93}
{access adhoc93}
{connect adhoc93(1), adhoc92(0)}
{nseg = 1}
{strdef color color = "White"}
{pt3dclear()}
{pt3dadd(171312.000000,213216.000000,62575.000000,23.110527)}
{pt3dadd(171000.000000,211920.000000,63000.000000,11.299376)}
{pt3dadd(171000.000000,211536.000000,63275.000000,7.379626)}
{pt3dadd(171180.000000,211104.000000,63200.000000,5.432350)}
{pt3dadd(171432.000000,210516.000000,63075.000000,6.532977)}
{pt3dadd(171924.000000,209880.000000,62850.000000,9.888295)}
{pt3dadd(172260.000000,209376.000000,62575.000000,14.790738)}

{create adhoc94}
{access adhoc94}
{connect adhoc94(1), adhoc92(0)}
{nseg = 1}
{strdef color color = "White"}
{pt3dclear()}
{pt3dadd(171312.000000,213216.000000,62575.000000,23.110527)}
{pt3dadd(171504.000000,213000.000000,62150.000000,14.623100)}
{pt3dadd(171336.000000,212700.000000,61650.000000,9.373860)}
{pt3dadd(171108.000000,212376.000000,61225.000000,7.961550)}
{pt3dadd(170712.000000,212196.000000,61050.000000,4.409795)}
{pt3dadd(170124.000000,211908.000000,60700.000000,4.409795)}
{pt3dadd(169596.000000,211704.000000,60825.000000,4.409795)}
{pt3dadd(169200.000000,211812.000000,60750.000000,7.319591)}
{pt3dadd(168840.000000,212052.000000,60825.000000,4.409795)}
{pt3dadd(168552.000000,212364.000000,61000.000000,4.409795)}
{pt3dadd(168324.000000,212460.000000,60975.000000,4.409795)}
{pt3dadd(168072.000000,212712.000000,61200.000000,6.338820)}
{pt3dadd(167748.000000,213012.000000,61200.000000,3.429025)}
{pt3dadd(167148.000000,212940.000000,61550.000000,3.429025)}
{pt3dadd(166860.000000,213108.000000,61550.000000,3.429025)}
{pt3dadd(166584.000000,212940.000000,61425.000000,4.676958)}
{pt3dadd(165948.000000,212916.000000,61350.000000,2.747934)}
{pt3dadd(165528.000000,212940.000000,61325.000000,3.522888)}
{pt3dadd(165084.000000,213108.000000,61425.000000,4.512833)}
{pt3dadd(164880.000000,213108.000000,61425.000000,4.441498)}
{pt3dadd(164568.000000,213024.000000,61525.000000,6.449724)}

{create adhoc95}
{access adhoc95}
{connect adhoc95(1), adhoc89(0)}
{nseg = 1}
{strdef color color = "White"}
{pt3dclear()}
{pt3dadd(172752.000000,216948.000000,69525.000000,69.007660)}
{pt3dadd(171888.000000,218136.000000,69050.000000,45.585007)}
{pt3dadd(171432.000000,218424.000000,68675.000000,27.951004)}
{pt3dadd(171108.000000,219084.000000,68375.000000,27.951004)}
{pt3dadd(170844.000000,219612.000000,68125.000000,15.001532)}
{pt3dadd(170472.000000,219900.000000,68025.000000,15.001532)}
{pt3dadd(170220.000000,220392.000000,67700.000000,15.001532)}
{pt3dadd(170100.000000,220680.000000,67525.000000,24.285930)}
{pt3dadd(169836.000000,221148.000000,67600.000000,10.784398)}
{pt3dadd(169476.000000,221604.000000,67525.000000,10.784398)}
{pt3dadd(168132.000000,222132.000000,67300.000000,10.784398)}
{pt3dadd(167772.000000,222516.000000,67200.000000,20.068796)}
{pt3dadd(167364.000000,222984.000000,67225.000000,20.068796)}
{pt3dadd(167004.000000,223128.000000,67225.000000,30.368374)}
{pt3dadd(166416.000000,223464.000000,66750.000000,49.613957)}
{pt3dadd(165876.000000,223680.000000,66775.000000,52.997890)}

{create adhoc96}
{access adhoc96}
{connect adhoc96(1), adhoc95(0)}
{nseg = 1}
{strdef color color = "White"}
{pt3dclear()}
{pt3dadd(165876.000000,223680.000000,66775.000000,52.997890)}
{pt3dadd(166200.000000,222384.000000,65425.000000,22.624012)}
{pt3dadd(166500.000000,222180.000000,65025.000000,15.422341)}
{pt3dadd(166848.000000,222156.000000,64775.000000,6.112708)}
{pt3dadd(166944.000000,222096.000000,64575.000000,5.229798)}
{pt3dadd(167268.000000,222024.000000,64000.000000,6.449724)}

{create adhoc97}
{access adhoc97}
{connect adhoc97(1), adhoc95(0)}
{nseg = 1}
{strdef color color = "White"}
{pt3dclear()}
{pt3dadd(165876.000000,223680.000000,66775.000000,52.997890)}
{pt3dadd(165516.000000,223920.000000,66775.000000,49.613957)}
{pt3dadd(165084.000000,224448.000000,66625.000000,47.283030)}
{pt3dadd(164604.000000,224892.000000,66425.000000,46.005110)}

{create adhoc98}
{access adhoc98}
{connect adhoc98(1), adhoc97(0)}
{nseg = 1}
{strdef color color = "White"}
{pt3dclear()}
{pt3dadd(164604.000000,224892.000000,66425.000000,46.005110)}
{pt3dadd(164496.000000,226488.000000,66425.000000,22.254627)}
{pt3dadd(164184.000000,227016.000000,66200.000000,13.952776)}
{pt3dadd(163812.000000,227640.000000,66100.000000,7.426584)}
{pt3dadd(163392.000000,228312.000000,66125.000000,3.874829)}
{pt3dadd(163020.000000,229008.000000,66350.000000,3.874829)}
{pt3dadd(162540.000000,229572.000000,66400.000000,3.874829)}
{pt3dadd(162192.000000,229944.000000,66350.000000,5.122763)}
{pt3dadd(161844.000000,230748.000000,66350.000000,2.747934)}
{pt3dadd(161640.000000,231456.000000,66175.000000,2.747934)}
{pt3dadd(161796.000000,232164.000000,65675.000000,2.747934)}
{pt3dadd(161832.000000,232284.000000,65375.000000,3.933950)}
{pt3dadd(162264.000000,232188.000000,65300.000000,2.686016)}
{pt3dadd(161880.000000,232668.000000,64650.000000,2.686016)}
{pt3dadd(161988.000000,232968.000000,64050.000000,2.686016)}
{pt3dadd(162180.000000,232992.000000,63650.000000,3.933950)}
{pt3dadd(162300.000000,232884.000000,63250.000000,2.747934)}
{pt3dadd(162912.000000,232488.000000,62800.000000,2.747934)}
{pt3dadd(163272.000000,232260.000000,62675.000000,2.747934)}
{pt3dadd(163848.000000,231768.000000,62675.000000,3.737879)}
{pt3dadd(164004.000000,231636.000000,62750.000000,3.264899)}
{pt3dadd(164076.000000,231420.000000,62825.000000,4.441498)}
{pt3dadd(164232.000000,231312.000000,62800.000000,5.374770)}

{create adhoc99}
{access adhoc99}
{connect adhoc99(1), adhoc97(0)}
{nseg = 1}
{strdef color color = "White"}
{pt3dclear()}
{pt3dadd(164604.000000,224892.000000,66425.000000,46.005110)}
{pt3dadd(164328.000000,224448.000000,66375.000000,31.809033)}
{pt3dadd(164040.000000,224520.000000,66425.000000,19.685420)}
{pt3dadd(163680.000000,224460.000000,66350.000000,16.873996)}
{pt3dadd(163152.000000,224652.000000,66450.000000,7.589598)}
{pt3dadd(162852.000000,224520.000000,66300.000000,7.589598)}
{pt3dadd(162456.000000,224736.000000,66300.000000,7.589598)}
{pt3dadd(162012.000000,224760.000000,66300.000000,13.945430)}
{pt3dadd(161580.000000,224640.000000,66150.000000,7.855832)}
{pt3dadd(161220.000000,224784.000000,65875.000000,7.855832)}
{pt3dadd(160824.000000,224976.000000,65825.000000,7.855832)}
{pt3dadd(160404.000000,224916.000000,65625.000000,14.211664)}
{pt3dadd(159948.000000,225120.000000,65625.000000,7.855832)}
{pt3dadd(159612.000000,225048.000000,65500.000000,7.855832)}
{pt3dadd(159084.000000,224844.000000,65250.000000,7.855832)}
{pt3dadd(158544.000000,224964.000000,64975.000000,12.177937)}
{pt3dadd(158148.000000,224616.000000,64750.000000,5.822105)}
{pt3dadd(157740.000000,224268.000000,64500.000000,5.822105)}
{pt3dadd(157296.000000,224388.000000,64250.000000,5.822105)}
{pt3dadd(156972.000000,224460.000000,64300.000000,11.068632)}
{pt3dadd(156588.000000,224160.000000,64250.000000,6.746526)}
{pt3dadd(156216.000000,223716.000000,64000.000000,6.746526)}
{pt3dadd(155880.000000,223536.000000,63850.000000,13.102358)}
{pt3dadd(155472.000000,223512.000000,63900.000000,19.458190)}
{pt3dadd(155100.000000,223200.000000,63700.000000,22.686107)}
{pt3dadd(154728.000000,222612.000000,63275.000000,33.279160)}

{create adhoc100}
{access adhoc100}
{connect adhoc100(1), adhoc99(0)}
{nseg = 1}
{strdef color color = "White"}
{pt3dclear()}
{pt3dadd(154728.000000,222612.000000,63275.000000,33.279160)}
{pt3dadd(154596.000000,223680.000000,64025.000000,22.686107)}
{pt3dadd(154368.000000,224964.000000,64375.000000,14.211664)}
{pt3dadd(154128.000000,225252.000000,64575.000000,11.407586)}
{pt3dadd(153972.000000,225396.000000,64650.000000,8.603509)}
{pt3dadd(153756.000000,225792.000000,64850.000000,12.155263)}
{pt3dadd(153456.000000,226104.000000,64950.000000,19.258772)}
{pt3dadd(153120.000000,226248.000000,65000.000000,19.258772)}

{create adhoc101}
{access adhoc101}
{connect adhoc101(1), adhoc100(0)}
{nseg = 1}
{strdef color color = "White"}
{pt3dclear()}
{pt3dadd(153120.000000,226248.000000,65000.000000,19.258772)}
{pt3dadd(153156.000000,227424.000000,65000.000000,8.711181)}
{pt3dadd(153120.000000,227544.000000,65025.000000,5.826708)}
{pt3dadd(153084.000000,227724.000000,65175.000000,4.203979)}
{pt3dadd(153060.000000,228252.000000,65175.000000,3.429025)}
{pt3dadd(152760.000000,228840.000000,65075.000000,3.429025)}
{pt3dadd(152424.000000,229332.000000,65075.000000,3.429025)}
{pt3dadd(152316.000000,229812.000000,65025.000000,4.986545)}
{pt3dadd(152124.000000,230004.000000,64875.000000,3.057520)}
{pt3dadd(151812.000000,230304.000000,64800.000000,3.057520)}
{pt3dadd(151512.000000,230772.000000,64800.000000,3.057520)}
{pt3dadd(151296.000000,231240.000000,64600.000000,5.432350)}
{pt3dadd(150972.000000,231612.000000,64300.000000,5.803854)}
{pt3dadd(150696.000000,232008.000000,63925.000000,8.673090)}
{pt3dadd(150336.000000,232392.000000,63525.000000,11.145123)}

{create adhoc102}
{access adhoc102}
{connect adhoc102(1), adhoc100(0)}
{nseg = 1}
{strdef color color = "White"}
{pt3dclear()}
{pt3dadd(153120.000000,226248.000000,65000.000000,19.258772)}
{pt3dadd(152808.000000,226176.000000,65000.000000,13.339181)}
{pt3dadd(152460.000000,226248.000000,65100.000000,8.603509)}
{pt3dadd(152208.000000,226188.000000,64900.000000,7.426584)}
{pt3dadd(151932.000000,226188.000000,64775.000000,3.874829)}
{pt3dadd(151620.000000,226068.000000,64825.000000,3.874829)}
{pt3dadd(151296.000000,225984.000000,64875.000000,3.874829)}
{pt3dadd(150984.000000,226296.000000,64925.000000,6.249659)}
{pt3dadd(150720.000000,226212.000000,64825.000000,3.874829)}
{pt3dadd(150408.000000,226320.000000,64800.000000,3.874829)}
{pt3dadd(150096.000000,226116.000000,64275.000000,3.874829)}
{pt3dadd(150012.000000,226128.000000,64125.000000,7.426584)}
{pt3dadd(149904.000000,226248.000000,63750.000000,5.051754)}
{pt3dadd(149916.000000,225996.000000,63275.000000,5.051754)}
{pt3dadd(149640.000000,226188.000000,62925.000000,5.051754)}
{pt3dadd(149520.000000,226320.000000,62425.000000,10.298281)}
{pt3dadd(149400.000000,226260.000000,62050.000000,6.746526)}
{pt3dadd(149352.000000,226212.000000,61600.000000,6.746526)}
{pt3dadd(149412.000000,226080.000000,61075.000000,6.746526)}
{pt3dadd(149472.000000,226104.000000,60525.000000,9.656322)}
{pt3dadd(149868.000000,226152.000000,59900.000000,4.409795)}
{pt3dadd(149988.000000,226476.000000,59425.000000,4.409795)}
{pt3dadd(150036.000000,226620.000000,59000.000000,4.409795)}
{pt3dadd(150456.000000,226404.000000,58600.000000,6.249659)}
{pt3dadd(150864.000000,226056.000000,58100.000000,4.897384)}
{pt3dadd(151332.000000,225780.000000,57900.000000,7.162307)}
{pt3dadd(151404.000000,225444.000000,57650.000000,9.287602)}

{create adhoc103}
{access adhoc103}
{connect adhoc103(1), adhoc99(0)}
{nseg = 1}
{strdef color color = "White"}
{pt3dclear()}
{pt3dadd(154728.000000,222612.000000,63275.000000,33.279160)}
{pt3dadd(153720.000000,221508.000000,62450.000000,24.904717)}
{pt3dadd(153156.000000,220020.000000,61600.000000,30.916826)}
{pt3dadd(152928.000000,218868.000000,60875.000000,27.123327)}
{pt3dadd(152988.000000,217920.000000,60525.000000,39.934990)}

{create adhoc104}
{access adhoc104}
{connect adhoc104(1), adhoc103(0)}
{nseg = 1}
{strdef color color = "White"}
{pt3dclear()}
{pt3dadd(152988.000000,217920.000000,60525.000000,39.934990)}
{pt3dadd(152136.000000,218664.000000,59175.000000,20.231254)}
{pt3dadd(152064.000000,218220.000000,58700.000000,12.738752)}
{pt3dadd(151896.000000,217872.000000,58375.000000,10.298281)}
{pt3dadd(151920.000000,217680.000000,58000.000000,6.746526)}
{pt3dadd(151944.000000,217524.000000,57575.000000,6.746526)}
{pt3dadd(151944.000000,216996.000000,57250.000000,6.746526)}
{pt3dadd(151716.000000,216348.000000,56800.000000,9.404674)}
{pt3dadd(151776.000000,216012.000000,56475.000000,4.158148)}
{pt3dadd(151740.000000,215328.000000,56200.000000,4.158148)}
{pt3dadd(151824.000000,214824.000000,55975.000000,8.480253)}
{pt3dadd(151932.000000,214428.000000,55750.000000,12.617474)}
{pt3dadd(152016.000000,214188.000000,55425.000000,15.598878)}
{pt3dadd(152220.000000,213852.000000,55375.000000,22.186106)}

{create adhoc105}
{access adhoc105}
{connect adhoc105(1), adhoc104(0)}
{nseg = 1}
{strdef color color = "White"}
{pt3dclear()}
{pt3dadd(152220.000000,213852.000000,55375.000000,22.186106)}
{pt3dadd(152304.000000,213084.000000,55775.000000,12.641144)}
{pt3dadd(152400.000000,212664.000000,55725.000000,7.037365)}
{pt3dadd(152568.000000,212424.000000,55600.000000,5.374770)}

{create adhoc106}
{access adhoc106}
{connect adhoc106(1), adhoc104(0)}
{nseg = 1}
{strdef color color = "White"}
{pt3dclear()}
{pt3dadd(152220.000000,213852.000000,55375.000000,22.186106)}
{pt3dadd(152316.000000,213372.000000,54725.000000,14.314959)}
{pt3dadd(152556.000000,213036.000000,54100.000000,9.188976)}
{pt3dadd(152796.000000,212892.000000,53975.000000,6.980779)}
{pt3dadd(152868.000000,212640.000000,53675.000000,3.429025)}
{pt3dadd(153012.000000,212112.000000,53300.000000,3.429025)}
{pt3dadd(153144.000000,211776.000000,53000.000000,3.429025)}
{pt3dadd(153168.000000,211380.000000,52525.000000,4.986545)}
{pt3dadd(153372.000000,210804.000000,52175.000000,3.057520)}
{pt3dadd(153612.000000,210312.000000,51925.000000,3.057520)}
{pt3dadd(153636.000000,209832.000000,51950.000000,3.057520)}
{pt3dadd(153924.000000,209496.000000,51575.000000,4.047465)}
{pt3dadd(154212.000000,209100.000000,51600.000000,2.489945)}
{pt3dadd(154416.000000,208764.000000,51425.000000,4.864774)}
{pt3dadd(154740.000000,208188.000000,51475.000000,5.639728)}
{pt3dadd(154980.000000,207804.000000,51525.000000,6.749639)}
{pt3dadd(155208.000000,207228.000000,51575.000000,5.374770)}

{create adhoc107}
{access adhoc107}
{connect adhoc107(1), adhoc103(0)}
{nseg = 1}
{strdef color color = "White"}
{pt3dclear()}
{pt3dadd(152988.000000,217920.000000,60525.000000,39.934990)}
{pt3dadd(153168.000000,216264.000000,59975.000000,27.123327)}
{pt3dadd(153216.000000,215988.000000,59825.000000,16.873996)}
{pt3dadd(153204.000000,215472.000000,59625.000000,15.542830)}
{pt3dadd(153276.000000,215076.000000,59500.000000,7.855832)}
{pt3dadd(153336.000000,214668.000000,59400.000000,7.855832)}
{pt3dadd(153600.000000,214296.000000,59400.000000,7.855832)}
{pt3dadd(153528.000000,213888.000000,59225.000000,14.211664)}
{pt3dadd(153480.000000,213468.000000,59150.000000,7.855832)}
{pt3dadd(153588.000000,212904.000000,59025.000000,7.855832)}
{pt3dadd(153648.000000,212472.000000,58925.000000,7.855832)}
{pt3dadd(153564.000000,212052.000000,58850.000000,15.223350)}
{pt3dadd(153600.000000,211572.000000,58725.000000,8.867518)}
{pt3dadd(153612.000000,211152.000000,58725.000000,8.867518)}
{pt3dadd(153588.000000,210744.000000,58725.000000,8.867518)}
{pt3dadd(153564.000000,210540.000000,58725.000000,16.554516)}
{pt3dadd(153648.000000,210180.000000,58700.000000,9.186998)}
{pt3dadd(153780.000000,209832.000000,58575.000000,9.186998)}
{pt3dadd(153816.000000,209460.000000,58525.000000,9.186998)}
{pt3dadd(153912.000000,209124.000000,58475.000000,15.542830)}
{pt3dadd(153996.000000,208764.000000,58425.000000,7.855832)}
{pt3dadd(154248.000000,208152.000000,58275.000000,7.855832)}
{pt3dadd(154332.000000,207684.000000,58050.000000,7.855832)}
{pt3dadd(154476.000000,207240.000000,57950.000000,14.211664)}
{pt3dadd(154512.000000,206604.000000,57900.000000,7.855832)}
{pt3dadd(154632.000000,206208.000000,57650.000000,7.855832)}
{pt3dadd(155052.000000,205380.000000,57650.000000,7.855832)}
{pt3dadd(155328.000000,205020.000000,57600.000000,15.542830)}
{pt3dadd(155472.000000,204564.000000,57675.000000,16.873996)}
{pt3dadd(155424.000000,204096.000000,57725.000000,23.229828)}
{pt3dadd(155520.000000,203796.000000,57725.000000,37.716380)}
{pt3dadd(155676.000000,203448.000000,57375.000000,33.279160)}

{create adhoc108}
{access adhoc108}
{connect adhoc108(1), adhoc107(0)}
{nseg = 1}
{strdef color color = "White"}
{pt3dclear()}
{pt3dadd(155676.000000,203448.000000,57375.000000,33.279160)}
{pt3dadd(156000.000000,203244.000000,57025.000000,22.686107)}
{pt3dadd(156300.000000,202716.000000,56750.000000,14.211664)}
{pt3dadd(156300.000000,202404.000000,56525.000000,14.211664)}
{pt3dadd(156336.000000,201984.000000,56275.000000,7.855832)}
{pt3dadd(156516.000000,201504.000000,56200.000000,7.855832)}
{pt3dadd(156708.000000,201012.000000,55975.000000,7.855832)}
{pt3dadd(156816.000000,200568.000000,55675.000000,13.102358)}
{pt3dadd(156816.000000,200196.000000,55325.000000,12.335181)}
{pt3dadd(156888.000000,199812.000000,54925.000000,18.691013)}
{pt3dadd(156936.000000,199368.000000,54800.000000,30.151688)}
{pt3dadd(156876.000000,199260.000000,54850.000000,33.279160)}

{create adhoc109}
{access adhoc109}
{connect adhoc109(1), adhoc108(0)}
{nseg = 1}
{strdef color color = "White"}
{pt3dclear()}
{pt3dadd(156876.000000,199260.000000,54850.000000,33.279160)}
{pt3dadd(156732.000000,199020.000000,54450.000000,19.296562)}
{pt3dadd(156540.000000,198828.000000,54075.000000,12.177937)}
{pt3dadd(156396.000000,198636.000000,53800.000000,10.846770)}
{pt3dadd(156180.000000,198396.000000,53375.000000,6.524665)}
{pt3dadd(156036.000000,198156.000000,53050.000000,6.524665)}
{pt3dadd(155844.000000,198096.000000,52675.000000,6.524665)}
{pt3dadd(155604.000000,197976.000000,52325.000000,11.771191)}
{pt3dadd(155676.000000,197760.000000,51925.000000,6.746526)}
{pt3dadd(155676.000000,197568.000000,51525.000000,11.068632)}
{pt3dadd(155652.000000,197400.000000,51075.000000,16.315158)}
{pt3dadd(155736.000000,197160.000000,50775.000000,17.447720)}
{pt3dadd(155904.000000,196860.000000,50450.000000,27.732632)}

{create adhoc110}
{access adhoc110}
{connect adhoc110(1), adhoc109(0)}
{nseg = 1}
{strdef color color = "White"}
{pt3dclear()}
{pt3dadd(155904.000000,196860.000000,50450.000000,27.732632)}
{pt3dadd(155688.000000,196668.000000,50050.000000,15.093870)}
{pt3dadd(155424.000000,196560.000000,49850.000000,9.656322)}
{pt3dadd(155412.000000,196296.000000,49575.000000,8.731901)}
{pt3dadd(155400.000000,196092.000000,49250.000000,5.822105)}
{pt3dadd(155376.000000,195840.000000,48975.000000,5.822105)}
{pt3dadd(155268.000000,195660.000000,48750.000000,5.822105)}
{pt3dadd(155400.000000,195492.000000,48450.000000,8.731901)}
{pt3dadd(155544.000000,195120.000000,48200.000000,4.409795)}
{pt3dadd(155520.000000,195072.000000,47900.000000,4.409795)}
{pt3dadd(155496.000000,194940.000000,47525.000000,4.409795)}
{pt3dadd(155436.000000,194904.000000,47250.000000,6.784625)}
{pt3dadd(155592.000000,194832.000000,46875.000000,3.874829)}
{pt3dadd(155712.000000,194700.000000,46550.000000,3.874829)}
{pt3dadd(155844.000000,194532.000000,46250.000000,3.874829)}
{pt3dadd(155892.000000,194328.000000,45950.000000,7.426584)}
{pt3dadd(155976.000000,194112.000000,45675.000000,5.051754)}
{pt3dadd(156156.000000,193968.000000,45300.000000,5.051754)}
{pt3dadd(156336.000000,193824.000000,44950.000000,5.051754)}
{pt3dadd(156576.000000,193584.000000,44650.000000,6.980779)}
{pt3dadd(156732.000000,193320.000000,44350.000000,3.429025)}
{pt3dadd(156900.000000,192756.000000,44050.000000,3.429025)}
{pt3dadd(156876.000000,192528.000000,44050.000000,3.429025)}
{pt3dadd(156948.000000,192216.000000,43850.000000,5.358049)}
{pt3dadd(157056.000000,192000.000000,43675.000000,3.429025)}
{pt3dadd(157260.000000,191484.000000,43525.000000,3.429025)}
{pt3dadd(157620.000000,190944.000000,43375.000000,3.429025)}
{pt3dadd(157752.000000,190452.000000,43325.000000,5.803854)}
{pt3dadd(157824.000000,189888.000000,43225.000000,3.874829)}
{pt3dadd(157896.000000,189468.000000,43075.000000,5.432350)}
{pt3dadd(157680.000000,189132.000000,42900.000000,6.680284)}
{pt3dadd(157644.000000,189120.000000,42700.000000,6.175757)}
{pt3dadd(157680.000000,189000.000000,42525.000000,7.739669)}

{create adhoc111}
{access adhoc111}
{connect adhoc111(1), adhoc109(0)}
{nseg = 1}
{strdef color color = "White"}
{pt3dclear()}
{pt3dadd(155904.000000,196860.000000,50450.000000,27.732632)}
{pt3dadd(156204.000000,194916.000000,50450.000000,13.459252)}
{pt3dadd(156012.000000,194340.000000,50750.000000,8.675551)}
{pt3dadd(156060.000000,194148.000000,50725.000000,7.751130)}
{pt3dadd(156012.000000,193884.000000,50675.000000,5.822105)}
{pt3dadd(155976.000000,193620.000000,50600.000000,5.822105)}
{pt3dadd(156048.000000,193344.000000,50600.000000,5.822105)}
{pt3dadd(156060.000000,193128.000000,50625.000000,9.373860)}
{pt3dadd(156012.000000,192864.000000,50550.000000,5.051754)}
{pt3dadd(155964.000000,192672.000000,50550.000000,5.051754)}
{pt3dadd(155976.000000,192420.000000,50450.000000,5.051754)}
{pt3dadd(155904.000000,192168.000000,50475.000000,7.961550)}
{pt3dadd(155700.000000,191916.000000,50475.000000,4.409795)}
{pt3dadd(155604.000000,191664.000000,50525.000000,4.409795)}
{pt3dadd(155604.000000,191400.000000,50525.000000,4.409795)}
{pt3dadd(155616.000000,191196.000000,50500.000000,6.338820)}
{pt3dadd(155592.000000,191028.000000,50425.000000,3.429025)}
{pt3dadd(155568.000000,190896.000000,50350.000000,3.429025)}
{pt3dadd(155532.000000,190656.000000,50375.000000,3.429025)}
{pt3dadd(155496.000000,190512.000000,50325.000000,6.338820)}
{pt3dadd(155448.000000,190272.000000,50300.000000,4.409795)}
{pt3dadd(155448.000000,190032.000000,50225.000000,4.409795)}
{pt3dadd(155460.000000,189744.000000,50225.000000,4.409795)}
{pt3dadd(155616.000000,189552.000000,50425.000000,7.319591)}
{pt3dadd(155652.000000,189312.000000,50675.000000,4.409795)}
{pt3dadd(155784.000000,189096.000000,50600.000000,4.409795)}
{pt3dadd(155892.000000,188856.000000,50575.000000,4.409795)}
{pt3dadd(156072.000000,188676.000000,50700.000000,5.657729)}
{pt3dadd(156048.000000,188472.000000,50725.000000,2.747934)}
{pt3dadd(156084.000000,188208.000000,50700.000000,2.747934)}
{pt3dadd(156120.000000,187980.000000,50675.000000,2.747934)}
{pt3dadd(156252.000000,187704.000000,50900.000000,3.522888)}
{pt3dadd(156360.000000,187524.000000,51000.000000,4.203979)}
{pt3dadd(156780.000000,187296.000000,51075.000000,6.006631)}
{pt3dadd(157032.000000,187032.000000,51075.000000,11.145123)}

{create adhoc112}
{access adhoc112}
{connect adhoc112(1), adhoc108(0)}
{nseg = 1}
{strdef color color = "White"}
{pt3dclear()}
{pt3dadd(156876.000000,199260.000000,54850.000000,33.279160)}
{pt3dadd(156804.000000,199080.000000,55475.000000,13.742961)}
{pt3dadd(156756.000000,198960.000000,55575.000000,8.845777)}
{pt3dadd(156576.000000,198780.000000,55575.000000,3.479890)}
{pt3dadd(156432.000000,198636.000000,55575.000000,2.489945)}
{pt3dadd(156324.000000,198516.000000,55600.000000,2.489945)}
{pt3dadd(156216.000000,198360.000000,55675.000000,2.489945)}
{pt3dadd(156084.000000,198108.000000,55675.000000,3.973165)}
{pt3dadd(155964.000000,197868.000000,55575.000000,2.983220)}
{pt3dadd(155796.000000,197676.000000,55575.000000,2.983220)}
{pt3dadd(155808.000000,197364.000000,55600.000000,2.983220)}
{pt3dadd(155772.000000,197124.000000,55750.000000,5.358049)}
{pt3dadd(155724.000000,196896.000000,55850.000000,3.874829)}
{pt3dadd(155736.000000,196932.000000,56150.000000,3.874829)}
{pt3dadd(155736.000000,196884.000000,56300.000000,3.874829)}
{pt3dadd(155688.000000,196680.000000,55800.000000,4.864774)}
{pt3dadd(155544.000000,196524.000000,55700.000000,2.489945)}
{pt3dadd(155436.000000,196356.000000,55650.000000,2.489945)}
{pt3dadd(155328.000000,196176.000000,55600.000000,2.489945)}
{pt3dadd(155328.000000,196020.000000,55650.000000,3.264899)}
{pt3dadd(155352.000000,195660.000000,55600.000000,2.870749)}
{pt3dadd(155424.000000,195468.000000,55450.000000,3.466544)}
{pt3dadd(155436.000000,195288.000000,55350.000000,4.777573)}
{pt3dadd(155520.000000,195180.000000,55375.000000,4.478975)}

{create adhoc113}
{access adhoc113}
{connect adhoc113(1), adhoc107(0)}
{nseg = 1}
{strdef color color = "White"}
{pt3dclear()}
{pt3dadd(155676.000000,203448.000000,57375.000000,33.279160)}
{pt3dadd(154860.000000,203592.000000,58800.000000,18.012644)}
{pt3dadd(154812.000000,202812.000000,59275.000000,11.407586)}
{pt3dadd(154932.000000,202212.000000,59400.000000,7.833158)}
{pt3dadd(155052.000000,201684.000000,59675.000000,4.281404)}
{pt3dadd(155280.000000,200892.000000,60050.000000,4.281404)}
{pt3dadd(155688.000000,200160.000000,60300.000000,4.281404)}
{pt3dadd(155880.000000,199812.000000,60375.000000,7.833158)}
{pt3dadd(156120.000000,199536.000000,60300.000000,5.051754)}
{pt3dadd(156444.000000,199260.000000,60500.000000,5.051754)}
{pt3dadd(156564.000000,198948.000000,60475.000000,5.051754)}
{pt3dadd(156888.000000,198612.000000,60625.000000,7.961550)}
{pt3dadd(157200.000000,198300.000000,60650.000000,4.409795)}
{pt3dadd(157260.000000,197964.000000,60500.000000,4.409795)}
{pt3dadd(157260.000000,197616.000000,60400.000000,4.409795)}
{pt3dadd(157368.000000,197232.000000,60300.000000,7.319591)}
{pt3dadd(157512.000000,196776.000000,60300.000000,4.409795)}
{pt3dadd(157644.000000,196164.000000,60300.000000,4.409795)}
{pt3dadd(157824.000000,195852.000000,60175.000000,4.409795)}
{pt3dadd(157812.000000,195288.000000,59925.000000,7.961550)}
{pt3dadd(157848.000000,195012.000000,59700.000000,5.051754)}
{pt3dadd(157884.000000,194760.000000,59500.000000,5.051754)}
{pt3dadd(157956.000000,194460.000000,59275.000000,5.051754)}
{pt3dadd(158112.000000,194220.000000,59250.000000,7.961550)}
{pt3dadd(158196.000000,193896.000000,58875.000000,4.409795)}
{pt3dadd(158772.000000,192936.000000,58375.000000,4.409795)}
{pt3dadd(158988.000000,192240.000000,57925.000000,4.409795)}
{pt3dadd(159660.000000,191184.000000,57600.000000,5.399740)}
{pt3dadd(159720.000000,190932.000000,57625.000000,2.489945)}
{pt3dadd(159900.000000,190608.000000,57525.000000,2.489945)}
{pt3dadd(160020.000000,190296.000000,57350.000000,2.489945)}
{pt3dadd(160104.000000,189960.000000,57100.000000,4.047465)}
{pt3dadd(159984.000000,188880.000000,56675.000000,3.057520)}
{pt3dadd(160008.000000,188748.000000,56450.000000,3.057520)}
{pt3dadd(159828.000000,188604.000000,56425.000000,4.897384)}
{pt3dadd(159828.000000,188400.000000,56175.000000,6.454904)}
{pt3dadd(159732.000000,188136.000000,56000.000000,7.162306)}
{pt3dadd(159660.000000,187956.000000,55725.000000,9.287602)}
