# Supplementary material for: Full reconstruction of large lobula plate tangential cells in Drosophila from a 3D EM dataset
Source: PLoS One. 2018 Nov 28;13(11):e0207828. doi: 10.1371/journal.pone.0207828 (PMC6261601; doi:10.1371/journal.pone.0207828)
Supplement: S1 Dataset — (ZIP) [file pone.0207828.s001.zip › Diameter hoc/VS_VSL_preliminary/VS5_5skels_ck.001_completed.hoc0006.hoc]

/* created with convertKnossosNmlToHoc.m */

{create adhoc1}
{access adhoc1}
{nseg = 1}
{strdef color color = "White"}
{pt3dclear()}
{pt3dadd(161388.000000,233520.000000,62275.000000,5.159780)}
{pt3dadd(161532.000000,233448.000000,62275.000000,4.411147)}
{pt3dadd(161664.000000,233520.000000,62500.000000,3.246688)}
{pt3dadd(161856.000000,233508.000000,62500.000000,3.997952)}
{pt3dadd(162000.000000,233580.000000,62700.000000,2.983220)}
{pt3dadd(162000.000000,233388.000000,62925.000000,2.983220)}
{pt3dadd(162012.000000,233328.000000,63150.000000,2.983220)}
{pt3dadd(162084.000000,233040.000000,63350.000000,4.466439)}
{pt3dadd(162204.000000,232968.000000,63575.000000,2.983220)}
{pt3dadd(162240.000000,232980.000000,63750.000000,2.983220)}
{pt3dadd(162024.000000,233004.000000,63925.000000,2.983220)}
{pt3dadd(161892.000000,232956.000000,64175.000000,5.893015)}
{pt3dadd(161916.000000,232752.000000,64425.000000,4.409795)}
{pt3dadd(162000.000000,232608.000000,64650.000000,4.409795)}
{pt3dadd(161832.000000,232452.000000,64900.000000,4.409795)}
{pt3dadd(161796.000000,232464.000000,65150.000000,7.319591)}
{pt3dadd(161832.000000,232284.000000,65375.000000,4.409795)}
{pt3dadd(161868.000000,232104.000000,65650.000000,4.409795)}
{pt3dadd(161820.000000,231948.000000,65800.000000,4.409795)}
{pt3dadd(161772.000000,231792.000000,65950.000000,6.338820)}
{pt3dadd(161724.000000,231624.000000,66100.000000,5.183294)}
{pt3dadd(161676.000000,231444.000000,66250.000000,9.320515)}
{pt3dadd(161640.000000,231288.000000,66400.000000,14.534191)}
{pt3dadd(161580.000000,230736.000000,66400.000000,22.186106)}

{create adhoc2}
{access adhoc2}
{connect adhoc2(1), adhoc1(0)}
{nseg = 1}
{strdef color color = "White"}
{pt3dclear()}
{pt3dadd(161580.000000,230736.000000,66400.000000,22.186106)}
{pt3dadd(160632.000000,230436.000000,66400.000000,10.867401)}
{pt3dadd(160644.000000,230388.000000,66650.000000,7.120441)}
{pt3dadd(160080.000000,230508.000000,66925.000000,3.973164)}
{pt3dadd(159576.000000,230508.000000,67100.000000,2.489945)}
{pt3dadd(159492.000000,230724.000000,67325.000000,2.489945)}
{pt3dadd(159180.000000,230904.000000,67525.000000,2.489945)}
{pt3dadd(159012.000000,231012.000000,67650.000000,3.675961)}
{pt3dadd(158748.000000,231084.000000,67825.000000,2.686016)}
{pt3dadd(158484.000000,231192.000000,68000.000000,2.686016)}
{pt3dadd(158220.000000,231288.000000,68200.000000,2.686016)}
{pt3dadd(157812.000000,231420.000000,68425.000000,3.460970)}
{pt3dadd(157356.000000,231588.000000,68600.000000,2.274954)}
{pt3dadd(157044.000000,231864.000000,68800.000000,2.274954)}
{pt3dadd(156600.000000,232020.000000,68950.000000,2.274954)}
{pt3dadd(156132.000000,232164.000000,69150.000000,4.203979)}
{pt3dadd(155712.000000,232212.000000,69325.000000,3.429025)}
{pt3dadd(155088.000000,232476.000000,69525.000000,3.429025)}
{pt3dadd(154908.000000,232584.000000,69550.000000,3.429025)}
{pt3dadd(154380.000000,232824.000000,69575.000000,5.358049)}
{pt3dadd(153828.000000,233160.000000,69575.000000,3.429025)}
{pt3dadd(153480.000000,233580.000000,69575.000000,3.429025)}
{pt3dadd(153300.000000,233652.000000,69800.000000,3.429025)}
{pt3dadd(153144.000000,233676.000000,69950.000000,4.912244)}
{pt3dadd(152976.000000,233856.000000,69925.000000,2.983220)}
{pt3dadd(152820.000000,233856.000000,69900.000000,2.983220)}
{pt3dadd(152652.000000,234000.000000,69925.000000,2.983220)}
{pt3dadd(152808.000000,234096.000000,69975.000000,3.715176)}
{pt3dadd(152772.000000,234240.000000,70000.000000,2.678452)}
{pt3dadd(152556.000000,234180.000000,70025.000000,3.464087)}
{pt3dadd(152400.000000,234096.000000,70050.000000,3.732480)}

{create adhoc3}
{access adhoc3}
{connect adhoc3(1), adhoc1(0)}
{nseg = 1}
{strdef color color = "White"}
{pt3dclear()}
{pt3dadd(161580.000000,230736.000000,66400.000000,22.186106)}
{pt3dadd(161712.000000,230448.000000,66450.000000,15.746908)}
{pt3dadd(161832.000000,230544.000000,66350.000000,10.048145)}
{pt3dadd(161952.000000,230340.000000,66350.000000,10.048145)}
{pt3dadd(162048.000000,230088.000000,66375.000000,5.637221)}
{pt3dadd(162168.000000,229944.000000,66300.000000,5.637221)}
{pt3dadd(162300.000000,229884.000000,66225.000000,5.637221)}
{pt3dadd(162408.000000,229800.000000,66325.000000,9.188976)}
{pt3dadd(162516.000000,229620.000000,66375.000000,5.051754)}
{pt3dadd(162636.000000,229428.000000,66350.000000,5.051754)}
{pt3dadd(162768.000000,229248.000000,66300.000000,5.051754)}
{pt3dadd(162900.000000,229092.000000,66350.000000,8.603509)}
{pt3dadd(163044.000000,229032.000000,66350.000000,5.051754)}
{pt3dadd(163188.000000,228852.000000,66275.000000,5.051754)}
{pt3dadd(163320.000000,228588.000000,66175.000000,5.051754)}
{pt3dadd(163452.000000,228372.000000,66175.000000,8.603509)}
{pt3dadd(163560.000000,228156.000000,66100.000000,5.051754)}
{pt3dadd(163704.000000,227844.000000,66100.000000,5.051754)}
{pt3dadd(163908.000000,227376.000000,66050.000000,7.833158)}
{pt3dadd(164052.000000,227004.000000,66225.000000,14.188990)}
{pt3dadd(164196.000000,226404.000000,66275.000000,16.728726)}
{pt3dadd(164196.000000,225216.000000,66525.000000,33.279160)}

{create adhoc4}
{access adhoc4}
{connect adhoc4(1), adhoc3(0)}
{nseg = 1}
{strdef color color = "White"}
{pt3dclear()}
{pt3dadd(164196.000000,225216.000000,66525.000000,33.279160)}
{pt3dadd(164412.000000,225108.000000,66450.000000,24.372251)}
{pt3dadd(164556.000000,225036.000000,66300.000000,15.223351)}
{pt3dadd(164772.000000,224820.000000,66525.000000,18.151917)}
{pt3dadd(164964.000000,224676.000000,66675.000000,10.784398)}
{pt3dadd(165144.000000,224580.000000,66725.000000,10.784398)}
{pt3dadd(165276.000000,224328.000000,66725.000000,10.784398)}
{pt3dadd(165408.000000,224076.000000,66725.000000,20.068796)}
{pt3dadd(165552.000000,223932.000000,66875.000000,10.784398)}
{pt3dadd(165720.000000,223764.000000,66750.000000,10.784398)}
{pt3dadd(165840.000000,223740.000000,66850.000000,10.784398)}
{pt3dadd(165996.000000,223716.000000,66950.000000,20.068796)}
{pt3dadd(166188.000000,223548.000000,66950.000000,10.784398)}
{pt3dadd(166344.000000,223488.000000,66975.000000,10.784398)}
{pt3dadd(166524.000000,223572.000000,66975.000000,10.784398)}
{pt3dadd(166668.000000,223260.000000,67025.000000,19.685420)}
{pt3dadd(166824.000000,223056.000000,67075.000000,10.401022)}
{pt3dadd(167052.000000,222912.000000,67100.000000,10.401022)}
{pt3dadd(167280.000000,222744.000000,67100.000000,10.401022)}
{pt3dadd(167508.000000,222564.000000,67100.000000,19.685420)}
{pt3dadd(167832.000000,222408.000000,67100.000000,10.784398)}
{pt3dadd(168168.000000,222264.000000,67250.000000,10.784398)}
{pt3dadd(168504.000000,222144.000000,67500.000000,10.784398)}
{pt3dadd(168852.000000,221952.000000,67425.000000,20.068796)}
{pt3dadd(169008.000000,221772.000000,67400.000000,10.784398)}
{pt3dadd(168828.000000,221604.000000,67525.000000,10.784398)}
{pt3dadd(169164.000000,221448.000000,67500.000000,10.784398)}
{pt3dadd(169548.000000,221256.000000,67450.000000,21.985675)}
{pt3dadd(169956.000000,221124.000000,67400.000000,12.701277)}
{pt3dadd(170004.000000,220980.000000,67675.000000,12.701277)}
{pt3dadd(170016.000000,220836.000000,67600.000000,12.701277)}
{pt3dadd(170028.000000,220704.000000,67525.000000,23.902554)}
{pt3dadd(170040.000000,220560.000000,67775.000000,12.701277)}
{pt3dadd(170160.000000,220404.000000,67875.000000,12.701277)}
{pt3dadd(170316.000000,220272.000000,67950.000000,23.442503)}
{pt3dadd(170472.000000,220116.000000,68025.000000,29.798335)}
{pt3dadd(170484.000000,219936.000000,68275.000000,29.995096)}
{pt3dadd(170268.000000,219780.000000,69150.000000,33.279160)}

{create adhoc5}
{access adhoc5}
{connect adhoc5(1), adhoc4(0)}
{nseg = 1}
{strdef color color = "White"}
{pt3dclear()}
{pt3dadd(170268.000000,219780.000000,69150.000000,33.279160)}
{pt3dadd(170616.000000,219684.000000,68250.000000,33.675503)}
{pt3dadd(170628.000000,219552.000000,68350.000000,20.805302)}
{pt3dadd(170772.000000,219408.000000,68375.000000,27.951002)}
{pt3dadd(170904.000000,219252.000000,68125.000000,15.001532)}
{pt3dadd(171036.000000,219084.000000,68275.000000,15.001532)}
{pt3dadd(171192.000000,218892.000000,68425.000000,15.001532)}
{pt3dadd(171336.000000,218640.000000,68575.000000,26.202809)}
{pt3dadd(171468.000000,218340.000000,68900.000000,12.701277)}
{pt3dadd(171636.000000,218388.000000,68875.000000,12.701277)}
{pt3dadd(171804.000000,218016.000000,68950.000000,26.202809)}
{pt3dadd(171948.000000,217824.000000,69225.000000,29.452586)}
{pt3dadd(172116.000000,217644.000000,69525.000000,29.418848)}
{pt3dadd(172272.000000,216204.000000,68775.000000,17.748884)}

{create adhoc6}
{access adhoc6}
{connect adhoc6(1), adhoc5(0)}
{nseg = 1}
{strdef color color = "White"}
{pt3dclear()}
{pt3dadd(172272.000000,216204.000000,68775.000000,17.748884)}
{pt3dadd(172428.000000,216756.000000,69175.000000,25.585090)}
{pt3dadd(172572.000000,216780.000000,69425.000000,15.951054)}
{pt3dadd(172692.000000,216948.000000,69700.000000,23.442503)}
{pt3dadd(172824.000000,216888.000000,69625.000000,12.241225)}
{pt3dadd(172956.000000,216828.000000,69575.000000,12.241225)}
{pt3dadd(173076.000000,216756.000000,69975.000000,12.241225)}
{pt3dadd(173208.000000,216696.000000,70025.000000,25.742757)}
{pt3dadd(173328.000000,216636.000000,70075.000000,15.001532)}
{pt3dadd(173436.000000,216576.000000,70125.000000,15.001532)}
{pt3dadd(173556.000000,216516.000000,70175.000000,15.001532)}
{pt3dadd(173700.000000,216540.000000,70275.000000,26.202809)}
{pt3dadd(173820.000000,216204.000000,70675.000000,12.701277)}
{pt3dadd(173964.000000,216324.000000,70550.000000,12.701277)}
{pt3dadd(174108.000000,216192.000000,71075.000000,12.701277)}
{pt3dadd(174228.000000,215976.000000,70950.000000,23.902554)}
{pt3dadd(174360.000000,215940.000000,71225.000000,12.701277)}
{pt3dadd(174480.000000,215988.000000,71525.000000,12.701277)}
{pt3dadd(174612.000000,216012.000000,71525.000000,12.701277)}
{pt3dadd(174756.000000,216000.000000,71525.000000,21.985675)}
{pt3dadd(174864.000000,215688.000000,71675.000000,10.784398)}
{pt3dadd(174960.000000,215808.000000,71750.000000,10.784398)}
{pt3dadd(175116.000000,216000.000000,71900.000000,10.784398)}
{pt3dadd(175224.000000,215868.000000,72025.000000,21.985675)}
{pt3dadd(175344.000000,215736.000000,72150.000000,12.701277)}
{pt3dadd(175464.000000,215556.000000,72250.000000,12.701277)}
{pt3dadd(175584.000000,215496.000000,72350.000000,12.701277)}
{pt3dadd(175716.000000,215316.000000,72750.000000,23.442503)}
{pt3dadd(175836.000000,215304.000000,72825.000000,12.241225)}
{pt3dadd(175968.000000,215292.000000,72900.000000,12.241225)}
{pt3dadd(176112.000000,215280.000000,72975.000000,12.241225)}
{pt3dadd(176244.000000,215268.000000,73050.000000,23.442503)}
{pt3dadd(176388.000000,215256.000000,73125.000000,12.701277)}
{pt3dadd(176544.000000,215220.000000,73200.000000,12.701277)}
{pt3dadd(176700.000000,215088.000000,73275.000000,12.701277)}
{pt3dadd(176844.000000,214908.000000,73375.000000,23.902554)}
{pt3dadd(176976.000000,214872.000000,73550.000000,12.701277)}
{pt3dadd(177096.000000,214836.000000,73625.000000,12.701277)}
{pt3dadd(177204.000000,214824.000000,73800.000000,12.701277)}
{pt3dadd(177324.000000,214812.000000,73975.000000,25.650747)}
{pt3dadd(177444.000000,214800.000000,74150.000000,14.449470)}
{pt3dadd(177552.000000,214716.000000,74200.000000,14.449470)}
{pt3dadd(177648.000000,214608.000000,74200.000000,14.449470)}
{pt3dadd(177792.000000,214500.000000,74200.000000,27.951002)}
{pt3dadd(177924.000000,214392.000000,74200.000000,15.001532)}
{pt3dadd(178056.000000,214332.000000,74475.000000,15.001532)}
{pt3dadd(178176.000000,214284.000000,74750.000000,15.001532)}
{pt3dadd(178284.000000,214200.000000,75000.000000,28.503064)}
{pt3dadd(178392.000000,214068.000000,75000.000000,15.001532)}
{pt3dadd(178536.000000,214008.000000,75250.000000,15.001532)}
{pt3dadd(178680.000000,213876.000000,75425.000000,15.001532)}
{pt3dadd(178812.000000,213864.000000,75600.000000,26.202809)}
{pt3dadd(178956.000000,213756.000000,75700.000000,12.701277)}
{pt3dadd(179040.000000,213600.000000,75950.000000,12.701277)}
{pt3dadd(179196.000000,213552.000000,76250.000000,12.701277)}
{pt3dadd(179352.000000,213504.000000,76500.000000,23.902554)}
{pt3dadd(179508.000000,213360.000000,76800.000000,12.701277)}
{pt3dadd(179664.000000,213264.000000,77025.000000,12.701277)}
{pt3dadd(179820.000000,213156.000000,77175.000000,12.701277)}
{pt3dadd(179964.000000,213012.000000,77375.000000,26.202809)}
{pt3dadd(180084.000000,212964.000000,77600.000000,15.001532)}
{pt3dadd(180216.000000,212916.000000,77825.000000,15.001532)}
{pt3dadd(180348.000000,212868.000000,77875.000000,15.001532)}
{pt3dadd(180492.000000,212688.000000,77950.000000,25.301109)}
{pt3dadd(180636.000000,212736.000000,78125.000000,11.799577)}
{pt3dadd(180768.000000,212676.000000,78300.000000,11.799577)}
{pt3dadd(180912.000000,212700.000000,78450.000000,11.799577)}
{pt3dadd(181032.000000,212724.000000,78600.000000,23.000854)}
{pt3dadd(181188.000000,212676.000000,78725.000000,12.701277)}
{pt3dadd(181308.000000,212544.000000,78800.000000,12.701277)}
{pt3dadd(181428.000000,212496.000000,78900.000000,12.701277)}
{pt3dadd(181572.000000,212496.000000,78725.000000,23.442503)}
{pt3dadd(181704.000000,212568.000000,78850.000000,12.241226)}
{pt3dadd(181884.000000,212508.000000,79175.000000,23.442503)}
{pt3dadd(182064.000000,212472.000000,79400.000000,36.391973)}
{pt3dadd(182232.000000,212496.000000,79775.000000,41.751245)}
{pt3dadd(182436.000000,212688.000000,80275.000000,66.247350)}

{create adhoc7}
{access adhoc7}
{connect adhoc7(1), adhoc6(0)}
{nseg = 1}
{strdef color color = "White"}
{pt3dclear()}
{pt3dadd(182436.000000,212688.000000,80275.000000,66.247350)}
{pt3dadd(182676.000000,212796.000000,80550.000000,41.751245)}
{pt3dadd(182868.000000,212772.000000,80825.000000,25.650747)}
{pt3dadd(183036.000000,212748.000000,81100.000000,23.902554)}
{pt3dadd(183228.000000,212652.000000,81050.000000,12.701277)}
{pt3dadd(183396.000000,212328.000000,81075.000000,12.701277)}
{pt3dadd(183576.000000,211932.000000,81250.000000,12.701277)}
{pt3dadd(183780.000000,211884.000000,81350.000000,26.202809)}
{pt3dadd(183948.000000,211836.000000,81450.000000,15.001532)}
{pt3dadd(184128.000000,211836.000000,81550.000000,15.001532)}
{pt3dadd(184344.000000,211836.000000,81825.000000,15.001532)}
{pt3dadd(184560.000000,211488.000000,81775.000000,31.263370)}
{pt3dadd(184752.000000,211464.000000,81850.000000,17.761838)}
{pt3dadd(184956.000000,211416.000000,82350.000000,17.761838)}
{pt3dadd(185484.000000,210972.000000,82750.000000,17.761838)}
{pt3dadd(186012.000000,210228.000000,83050.000000,31.263370)}
{pt3dadd(186636.000000,209700.000000,83450.000000,20.248058)}
{pt3dadd(187260.000000,208704.000000,83900.000000,32.746764)}
{pt3dadd(187416.000000,206352.000000,84275.000000,27.732632)}

{create adhoc8}
{access adhoc8}
{connect adhoc8(1), adhoc7(0)}
{nseg = 1}
{strdef color color = "White"}
{pt3dclear()}
{pt3dadd(187416.000000,206352.000000,84275.000000,27.732632)}
{pt3dadd(187452.000000,206784.000000,84575.000000,20.837264)}
{pt3dadd(187368.000000,207600.000000,84800.000000,13.102358)}
{pt3dadd(187620.000000,207744.000000,85125.000000,21.357364)}
{pt3dadd(187872.000000,207888.000000,85450.000000,15.001532)}
{pt3dadd(188124.000000,208032.000000,85800.000000,15.001532)}
{pt3dadd(188376.000000,208188.000000,86075.000000,15.001532)}
{pt3dadd(188496.000000,208080.000000,86375.000000,31.263370)}
{pt3dadd(188616.000000,207972.000000,86700.000000,17.761838)}
{pt3dadd(188436.000000,208248.000000,86975.000000,17.761838)}
{pt3dadd(188256.000000,208392.000000,87300.000000,17.761838)}
{pt3dadd(188244.000000,208560.000000,87650.000000,31.263370)}
{pt3dadd(188160.000000,208548.000000,87925.000000,15.001532)}
{pt3dadd(188460.000000,208644.000000,88275.000000,15.001532)}
{pt3dadd(189036.000000,208836.000000,88600.000000,15.001532)}
{pt3dadd(189024.000000,208860.000000,88950.000000,26.202809)}
{pt3dadd(189012.000000,208884.000000,89225.000000,12.701277)}
{pt3dadd(189000.000000,208908.000000,89525.000000,12.701277)}
{pt3dadd(188988.000000,208932.000000,89825.000000,12.701277)}
{pt3dadd(188976.000000,208956.000000,90075.000000,26.202809)}
{pt3dadd(188964.000000,209076.000000,90350.000000,15.001532)}
{pt3dadd(189240.000000,208812.000000,90650.000000,15.001532)}
{pt3dadd(189516.000000,208548.000000,90975.000000,15.001532)}
{pt3dadd(189612.000000,208716.000000,91250.000000,28.503064)}
{pt3dadd(189708.000000,208884.000000,91500.000000,15.001532)}
{pt3dadd(189732.000000,209052.000000,91750.000000,15.001532)}
{pt3dadd(189984.000000,209136.000000,91950.000000,15.001532)}
{pt3dadd(190152.000000,208980.000000,92175.000000,24.285930)}
{pt3dadd(190140.000000,208824.000000,92375.000000,10.784398)}
{pt3dadd(190680.000000,208536.000000,92600.000000,10.784398)}
{pt3dadd(190560.000000,208704.000000,92800.000000,10.784398)}
{pt3dadd(190416.000000,208872.000000,93050.000000,20.068796)}
{pt3dadd(190536.000000,209148.000000,93275.000000,10.784398)}
{pt3dadd(190632.000000,209136.000000,93525.000000,10.784398)}
{pt3dadd(190860.000000,208956.000000,93850.000000,10.784398)}
{pt3dadd(190956.000000,209028.000000,94100.000000,21.985675)}
{pt3dadd(191052.000000,209100.000000,94350.000000,12.701277)}
{pt3dadd(191148.000000,209172.000000,94625.000000,12.701277)}
{pt3dadd(191244.000000,208956.000000,94900.000000,12.701277)}
{pt3dadd(191340.000000,208740.000000,95175.000000,21.985675)}
{pt3dadd(191436.000000,208560.000000,95450.000000,10.784398)}
{pt3dadd(191352.000000,208140.000000,95700.000000,10.784398)}
{pt3dadd(191832.000000,207876.000000,96050.000000,10.784398)}
{pt3dadd(191652.000000,207948.000000,96300.000000,21.985675)}
{pt3dadd(191472.000000,208020.000000,96600.000000,12.701277)}
{pt3dadd(191292.000000,208092.000000,96875.000000,12.701277)}
{pt3dadd(191112.000000,208164.000000,97250.000000,12.701277)}
{pt3dadd(191232.000000,207924.000000,97525.000000,26.202809)}
{pt3dadd(191352.000000,207684.000000,97825.000000,15.001532)}
{pt3dadd(191472.000000,207444.000000,98100.000000,15.001532)}
{pt3dadd(191592.000000,207204.000000,98450.000000,15.001532)}
{pt3dadd(191712.000000,206964.000000,98725.000000,27.951002)}
{pt3dadd(191832.000000,206724.000000,99025.000000,14.449470)}
{pt3dadd(191952.000000,206484.000000,99425.000000,14.449470)}
{pt3dadd(192072.000000,206244.000000,99750.000000,14.449470)}
{pt3dadd(192192.000000,206004.000000,100100.000000,26.360182)}
{pt3dadd(192312.000000,205764.000000,100400.000000,13.410712)}
{pt3dadd(192432.000000,205524.000000,100675.000000,13.410712)}
{pt3dadd(192552.000000,205284.000000,100975.000000,13.410712)}
{pt3dadd(192672.000000,205044.000000,101250.000000,26.912244)}
{pt3dadd(192540.000000,204864.000000,101575.000000,15.001532)}
{pt3dadd(192408.000000,204684.000000,101825.000000,15.001532)}
{pt3dadd(192276.000000,204504.000000,102150.000000,15.001532)}
{pt3dadd(192324.000000,204240.000000,102500.000000,23.902554)}
{pt3dadd(192372.000000,203976.000000,102775.000000,10.401022)}
{pt3dadd(192288.000000,203544.000000,103075.000000,10.401022)}
{pt3dadd(191952.000000,203280.000000,103350.000000,10.401022)}
{pt3dadd(191976.000000,203148.000000,103650.000000,19.302043)}
{pt3dadd(192000.000000,203040.000000,104000.000000,10.401022)}
{pt3dadd(192024.000000,202932.000000,104300.000000,10.401022)}
{pt3dadd(192048.000000,202824.000000,104600.000000,10.401022)}
{pt3dadd(192072.000000,202716.000000,104925.000000,18.088020)}
{pt3dadd(192096.000000,202452.000000,105250.000000,9.186998)}
{pt3dadd(192120.000000,202188.000000,105525.000000,9.186998)}
{pt3dadd(191940.000000,202008.000000,105825.000000,9.186998)}
{pt3dadd(191760.000000,201828.000000,106100.000000,16.873996)}
{pt3dadd(191724.000000,201792.000000,106325.000000,9.186998)}
{pt3dadd(191868.000000,201168.000000,106600.000000,9.186998)}
{pt3dadd(191784.000000,200988.000000,106850.000000,9.186998)}
{pt3dadd(191424.000000,200976.000000,107075.000000,15.542830)}
{pt3dadd(191388.000000,200892.000000,107350.000000,7.855832)}
{pt3dadd(191352.000000,200808.000000,107650.000000,7.855832)}
{pt3dadd(191220.000000,200628.000000,107925.000000,7.855832)}
{pt3dadd(190872.000000,200292.000000,108175.000000,13.102358)}
{pt3dadd(191052.000000,200004.000000,108500.000000,6.746526)}
{pt3dadd(190968.000000,199872.000000,108800.000000,6.746526)}
{pt3dadd(190788.000000,199764.000000,109175.000000,6.746526)}
{pt3dadd(190656.000000,199344.000000,109475.000000,13.102358)}
{pt3dadd(190704.000000,199392.000000,109850.000000,7.855832)}
{pt3dadd(190752.000000,199440.000000,110225.000000,7.855832)}
{pt3dadd(190800.000000,199488.000000,110575.000000,7.855832)}
{pt3dadd(190848.000000,199536.000000,110900.000000,19.057109)}
{pt3dadd(190896.000000,199452.000000,111225.000000,12.701277)}
{pt3dadd(190836.000000,199140.000000,111525.000000,12.701277)}
{pt3dadd(190824.000000,199056.000000,111875.000000,12.701277)}
{pt3dadd(190872.000000,198972.000000,112200.000000,20.388275)}
{pt3dadd(190896.000000,198864.000000,112500.000000,9.186998)}
{pt3dadd(190920.000000,198756.000000,112775.000000,9.186998)}
{pt3dadd(190812.000000,198600.000000,113150.000000,9.186998)}
{pt3dadd(190524.000000,198264.000000,113500.000000,18.088020)}
{pt3dadd(190236.000000,197940.000000,113775.000000,10.401022)}
{pt3dadd(190104.000000,197856.000000,114075.000000,10.401022)}
{pt3dadd(189972.000000,197796.000000,114350.000000,10.401022)}
{pt3dadd(189840.000000,197760.000000,114675.000000,21.602299)}
{pt3dadd(189624.000000,197292.000000,114975.000000,12.701277)}
{pt3dadd(189468.000000,197208.000000,115275.000000,12.701277)}
{pt3dadd(189300.000000,197328.000000,115625.000000,12.701277)}
{pt3dadd(189084.000000,196992.000000,115825.000000,21.602299)}
{pt3dadd(188880.000000,196776.000000,116050.000000,10.401022)}
{pt3dadd(188664.000000,196440.000000,116325.000000,10.401022)}
{pt3dadd(188448.000000,196320.000000,116575.000000,10.401022)}
{pt3dadd(188244.000000,196188.000000,116875.000000,19.685420)}
{pt3dadd(188112.000000,195972.000000,117250.000000,10.784398)}
{pt3dadd(187848.000000,195792.000000,117600.000000,10.784398)}
{pt3dadd(187380.000000,195168.000000,117925.000000,10.784398)}
{pt3dadd(186888.000000,194904.000000,118200.000000,20.068796)}
{pt3dadd(186396.000000,194640.000000,118550.000000,10.784398)}
{pt3dadd(185904.000000,194376.000000,118975.000000,10.784398)}
{pt3dadd(185412.000000,194112.000000,119300.000000,10.784398)}
{pt3dadd(184920.000000,193848.000000,119725.000000,20.068796)}
{pt3dadd(184680.000000,193536.000000,120025.000000,10.784398)}
{pt3dadd(184320.000000,193500.000000,120400.000000,10.784398)}
{pt3dadd(184176.000000,193368.000000,120525.000000,10.784398)}
{pt3dadd(183996.000000,193236.000000,120650.000000,20.068796)}
{pt3dadd(183840.000000,193104.000000,120775.000000,10.784398)}
{pt3dadd(183684.000000,192972.000000,120900.000000,10.784398)}
{pt3dadd(183504.000000,192864.000000,121000.000000,10.784398)}
{pt3dadd(183312.000000,192756.000000,121100.000000,20.068796)}
{pt3dadd(183156.000000,192648.000000,121200.000000,10.784398)}
{pt3dadd(182964.000000,192588.000000,121275.000000,10.784398)}
{pt3dadd(182808.000000,192408.000000,121475.000000,10.784398)}
{pt3dadd(182652.000000,192348.000000,121725.000000,20.068796)}
{pt3dadd(182460.000000,192060.000000,121725.000000,10.784398)}
{pt3dadd(182256.000000,191976.000000,121825.000000,10.784398)}
{pt3dadd(182040.000000,192000.000000,121750.000000,10.784398)}
{pt3dadd(181836.000000,191760.000000,121950.000000,20.068796)}
{pt3dadd(181656.000000,191520.000000,122150.000000,10.784398)}
{pt3dadd(181452.000000,191280.000000,122350.000000,10.784398)}
{pt3dadd(181260.000000,191268.000000,122550.000000,10.784398)}
{pt3dadd(181020.000000,191184.000000,122650.000000,19.685420)}
{pt3dadd(180816.000000,191076.000000,122350.000000,10.401022)}
{pt3dadd(180600.000000,191040.000000,122625.000000,10.401022)}
{pt3dadd(180372.000000,190800.000000,122925.000000,10.401022)}
{pt3dadd(180156.000000,190560.000000,123250.000000,19.685420)}
{pt3dadd(179964.000000,190200.000000,123500.000000,10.784398)}
{pt3dadd(179748.000000,189732.000000,123575.000000,10.784398)}
{pt3dadd(179568.000000,189516.000000,123600.000000,10.784398)}
{pt3dadd(179388.000000,189252.000000,123750.000000,20.068796)}
{pt3dadd(179220.000000,189096.000000,123950.000000,10.784398)}
{pt3dadd(179004.000000,188940.000000,124150.000000,10.784398)}
{pt3dadd(178788.000000,188964.000000,124250.000000,10.784398)}
{pt3dadd(178632.000000,188628.000000,124575.000000,17.140230)}
{pt3dadd(178464.000000,188412.000000,124650.000000,7.855832)}
{pt3dadd(178308.000000,188196.000000,124725.000000,7.855832)}
{pt3dadd(178068.000000,188136.000000,124800.000000,7.855832)}
{pt3dadd(177900.000000,188076.000000,124875.000000,14.211664)}
{pt3dadd(177708.000000,187896.000000,125050.000000,7.855832)}
{pt3dadd(177492.000000,187452.000000,125225.000000,7.855832)}
{pt3dadd(177312.000000,187008.000000,125400.000000,7.855832)}
{pt3dadd(177132.000000,186384.000000,125500.000000,14.211664)}
{pt3dadd(176940.000000,185868.000000,125650.000000,7.855832)}
{pt3dadd(176748.000000,185856.000000,125850.000000,7.855832)}
{pt3dadd(176508.000000,185568.000000,125950.000000,7.855832)}
{pt3dadd(176268.000000,185280.000000,126075.000000,17.140230)}
{pt3dadd(176076.000000,184560.000000,126275.000000,10.784398)}
{pt3dadd(175884.000000,184464.000000,126400.000000,10.784398)}
{pt3dadd(175704.000000,184224.000000,126550.000000,10.784398)}
{pt3dadd(175560.000000,183984.000000,126725.000000,18.471396)}
{pt3dadd(175416.000000,183984.000000,126700.000000,9.186998)}
{pt3dadd(175284.000000,183888.000000,127025.000000,9.186998)}
{pt3dadd(175140.000000,183948.000000,127125.000000,9.186998)}
{pt3dadd(174996.000000,183852.000000,127250.000000,16.873996)}
{pt3dadd(174852.000000,183828.000000,127300.000000,9.186998)}
{pt3dadd(174684.000000,183900.000000,127275.000000,9.186998)}
{pt3dadd(174552.000000,183600.000000,127350.000000,9.186998)}
{pt3dadd(174384.000000,183204.000000,127425.000000,16.873996)}
{pt3dadd(174240.000000,183072.000000,127525.000000,9.186998)}
{pt3dadd(174084.000000,182964.000000,127625.000000,9.186998)}
{pt3dadd(173928.000000,182832.000000,127650.000000,9.186998)}
{pt3dadd(173736.000000,182580.000000,127750.000000,16.554516)}
{pt3dadd(173568.000000,182328.000000,127850.000000,8.867518)}
{pt3dadd(173400.000000,182172.000000,127925.000000,8.867518)}
{pt3dadd(173220.000000,182364.000000,128025.000000,8.867518)}
{pt3dadd(173076.000000,182088.000000,128075.000000,16.554516)}
{pt3dadd(172920.000000,181764.000000,128125.000000,9.186998)}
{pt3dadd(172740.000000,181764.000000,128275.000000,9.186998)}
{pt3dadd(172596.000000,181608.000000,128250.000000,9.186998)}
{pt3dadd(172440.000000,181392.000000,128275.000000,15.542830)}
{pt3dadd(172284.000000,181344.000000,128500.000000,7.855832)}
{pt3dadd(172128.000000,181272.000000,128725.000000,7.855832)}
{pt3dadd(171948.000000,181128.000000,128725.000000,7.855832)}
{pt3dadd(171804.000000,180984.000000,128725.000000,15.542830)}
{pt3dadd(171648.000000,180792.000000,128800.000000,9.186998)}
{pt3dadd(171504.000000,180600.000000,128975.000000,9.186998)}
{pt3dadd(171360.000000,180480.000000,129125.000000,9.186998)}
{pt3dadd(171168.000000,180360.000000,129300.000000,16.554517)}
{pt3dadd(171036.000000,180264.000000,129300.000000,8.867519)}
{pt3dadd(170904.000000,180012.000000,129375.000000,8.867519)}
{pt3dadd(170712.000000,179796.000000,129475.000000,8.867519)}
{pt3dadd(170520.000000,179664.000000,129650.000000,16.554517)}
{pt3dadd(170328.000000,179496.000000,129500.000000,9.186998)}
{pt3dadd(170148.000000,179148.000000,129725.000000,9.186998)}
{pt3dadd(169992.000000,178980.000000,129975.000000,9.186998)}
{pt3dadd(169788.000000,178704.000000,130050.000000,16.873996)}
{pt3dadd(169572.000000,178632.000000,130175.000000,9.186998)}
{pt3dadd(169356.000000,178572.000000,130475.000000,9.186998)}
{pt3dadd(169176.000000,178164.000000,130625.000000,9.186998)}
{pt3dadd(168960.000000,177948.000000,130500.000000,18.471396)}
{pt3dadd(168816.000000,177792.000000,130675.000000,10.784398)}
{pt3dadd(168660.000000,177540.000000,130775.000000,10.784398)}
{pt3dadd(168504.000000,177324.000000,130975.000000,10.784398)}
{pt3dadd(168324.000000,176952.000000,131175.000000,21.525624)}
{pt3dadd(168144.000000,176676.000000,131375.000000,12.241226)}
{pt3dadd(167964.000000,176496.000000,131525.000000,12.241226)}
{pt3dadd(167808.000000,176352.000000,131675.000000,12.241226)}
{pt3dadd(167628.000000,176376.000000,131750.000000,23.442503)}
{pt3dadd(167436.000000,175776.000000,131875.000000,12.701277)}
{pt3dadd(167268.000000,175476.000000,131975.000000,12.701277)}
{pt3dadd(167124.000000,175380.000000,131950.000000,12.701277)}
{pt3dadd(166992.000000,175080.000000,131900.000000,23.902554)}
{pt3dadd(166836.000000,174660.000000,132100.000000,12.701277)}
{pt3dadd(166656.000000,174480.000000,132125.000000,12.701277)}
{pt3dadd(166440.000000,173928.000000,132325.000000,12.701277)}
{pt3dadd(166212.000000,173784.000000,132250.000000,23.902554)}
{pt3dadd(166068.000000,173772.000000,132450.000000,12.701277)}
{pt3dadd(165804.000000,173892.000000,132675.000000,12.701277)}
{pt3dadd(165516.000000,172788.000000,132925.000000,12.701277)}
{pt3dadd(165540.000000,172428.000000,133150.000000,21.602299)}
{pt3dadd(165120.000000,172008.000000,133325.000000,10.401022)}
{pt3dadd(164784.000000,171672.000000,133575.000000,10.401022)}
{pt3dadd(164448.000000,171348.000000,133825.000000,10.401022)}
{pt3dadd(164316.000000,171252.000000,134050.000000,19.302043)}
{pt3dadd(163716.000000,170688.000000,134275.000000,10.401022)}
{pt3dadd(163644.000000,170172.000000,134500.000000,10.401022)}
{pt3dadd(163428.000000,169680.000000,134700.000000,10.401022)}
{pt3dadd(163044.000000,169704.000000,134950.000000,19.685420)}
{pt3dadd(162528.000000,169464.000000,135225.000000,10.784398)}
{pt3dadd(161904.000000,169248.000000,135525.000000,10.784398)}
{pt3dadd(161868.000000,168864.000000,135800.000000,10.784398)}
{pt3dadd(161736.000000,168444.000000,136100.000000,21.985675)}
{pt3dadd(161604.000000,168192.000000,136300.000000,12.701277)}
{pt3dadd(161472.000000,168000.000000,136500.000000,12.701277)}
{pt3dadd(161340.000000,167784.000000,136700.000000,12.701277)}
{pt3dadd(161304.000000,167556.000000,137025.000000,21.602299)}
{pt3dadd(161556.000000,167292.000000,136925.000000,10.401022)}
{pt3dadd(161520.000000,167124.000000,137000.000000,10.401022)}
{pt3dadd(161484.000000,166944.000000,137075.000000,10.401022)}
{pt3dadd(161448.000000,166752.000000,137150.000000,18.088020)}
{pt3dadd(161412.000000,166572.000000,137225.000000,9.186998)}
{pt3dadd(161376.000000,166344.000000,137300.000000,9.186998)}
{pt3dadd(161340.000000,166152.000000,137375.000000,9.186998)}
{pt3dadd(161304.000000,165960.000000,137450.000000,16.873996)}
{pt3dadd(161268.000000,165804.000000,137525.000000,9.186998)}
{pt3dadd(161232.000000,165624.000000,137600.000000,9.186998)}
{pt3dadd(161196.000000,165456.000000,137675.000000,9.186998)}
{pt3dadd(161160.000000,165312.000000,137750.000000,18.471396)}
{pt3dadd(161124.000000,165180.000000,137825.000000,10.784398)}
{pt3dadd(161040.000000,165024.000000,137725.000000,10.784398)}
{pt3dadd(160944.000000,164868.000000,137625.000000,10.784398)}
{pt3dadd(161064.000000,164712.000000,137900.000000,19.685420)}
{pt3dadd(160932.000000,164484.000000,138125.000000,10.401022)}
{pt3dadd(160716.000000,164280.000000,138200.000000,10.401022)}
{pt3dadd(160680.000000,164112.000000,138300.000000,10.401022)}
{pt3dadd(160644.000000,163956.000000,138275.000000,21.602299)}
{pt3dadd(160488.000000,163800.000000,138525.000000,12.701277)}
{pt3dadd(160380.000000,163608.000000,138600.000000,12.701277)}
{pt3dadd(160344.000000,163452.000000,138675.000000,12.701277)}
{pt3dadd(160164.000000,163260.000000,138550.000000,23.902554)}
{pt3dadd(160032.000000,163044.000000,138775.000000,12.701277)}
{pt3dadd(159744.000000,162876.000000,138875.000000,12.701277)}
{pt3dadd(159816.000000,162708.000000,139125.000000,12.701277)}
{pt3dadd(159636.000000,162504.000000,139100.000000,26.202809)}
{pt3dadd(159552.000000,162324.000000,139000.000000,15.001532)}
{pt3dadd(159468.000000,162180.000000,139200.000000,15.001532)}
{pt3dadd(159432.000000,161976.000000,139550.000000,15.001532)}
{pt3dadd(159216.000000,161748.000000,139475.000000,26.202809)}
{pt3dadd(159000.000000,161544.000000,139400.000000,12.701277)}
{pt3dadd(158964.000000,161364.000000,139425.000000,12.701277)}
{pt3dadd(158988.000000,161172.000000,139525.000000,12.701277)}
{pt3dadd(159012.000000,160968.000000,139625.000000,26.202809)}
{pt3dadd(159036.000000,160752.000000,139725.000000,15.001532)}
{pt3dadd(159084.000000,160608.000000,139875.000000,15.001532)}
{pt3dadd(159132.000000,160392.000000,140025.000000,15.001532)}
{pt3dadd(159096.000000,160260.000000,140075.000000,27.421024)}
{pt3dadd(159060.000000,160044.000000,140125.000000,13.919492)}
{pt3dadd(159024.000000,159828.000000,140175.000000,13.919492)}
{pt3dadd(158988.000000,159648.000000,140225.000000,13.919492)}
{pt3dadd(158952.000000,159444.000000,140275.000000,27.421024)}
{pt3dadd(158916.000000,159276.000000,140325.000000,15.001532)}
{pt3dadd(158880.000000,159072.000000,140675.000000,15.001532)}
{pt3dadd(158820.000000,158904.000000,140650.000000,15.001532)}
{pt3dadd(158892.000000,158724.000000,140750.000000,26.202809)}
{pt3dadd(159036.000000,158544.000000,140975.000000,12.701277)}
{pt3dadd(159000.000000,158388.000000,141000.000000,12.701277)}
{pt3dadd(158964.000000,158208.000000,141025.000000,12.701277)}
{pt3dadd(158928.000000,158052.000000,141050.000000,23.902554)}
{pt3dadd(158844.000000,157920.000000,141025.000000,12.701277)}
{pt3dadd(158604.000000,157800.000000,141400.000000,12.701277)}
{pt3dadd(158472.000000,157548.000000,141400.000000,12.701277)}
{pt3dadd(158388.000000,156540.000000,141700.000000,26.202809)}
{pt3dadd(158532.000000,156024.000000,142000.000000,15.001532)}
{pt3dadd(158520.000000,155868.000000,142350.000000,15.001532)}
{pt3dadd(158364.000000,155508.000000,142650.000000,15.001532)}
{pt3dadd(158064.000000,154632.000000,142875.000000,26.912244)}
{pt3dadd(157680.000000,153936.000000,143150.000000,13.410712)}
{pt3dadd(157416.000000,153552.000000,143400.000000,13.410712)}
{pt3dadd(157308.000000,153132.000000,143675.000000,13.410712)}
{pt3dadd(157092.000000,152640.000000,143950.000000,24.611990)}
{pt3dadd(156600.000000,152340.000000,144275.000000,12.701277)}
{pt3dadd(156108.000000,152040.000000,144600.000000,12.701277)}
{pt3dadd(155616.000000,151728.000000,144900.000000,12.701277)}
{pt3dadd(155460.000000,151716.000000,145200.000000,20.068796)}
{pt3dadd(154992.000000,151584.000000,145450.000000,8.867519)}
{pt3dadd(154476.000000,151068.000000,145775.000000,8.867519)}
{pt3dadd(154164.000000,150936.000000,146125.000000,8.867519)}
{pt3dadd(153984.000000,150960.000000,146425.000000,20.068796)}
{pt3dadd(153852.000000,150900.000000,146725.000000,12.701277)}
{pt3dadd(153516.000000,151068.000000,147050.000000,12.701277)}
{pt3dadd(153372.000000,151356.000000,147375.000000,12.701277)}
{pt3dadd(152772.000000,151296.000000,147625.000000,21.985675)}
{pt3dadd(152592.000000,151260.000000,147925.000000,10.784398)}
{pt3dadd(152412.000000,151224.000000,148225.000000,10.784398)}
{pt3dadd(152376.000000,151164.000000,148550.000000,10.784398)}
{pt3dadd(152352.000000,151104.000000,148800.000000,20.068796)}
{pt3dadd(152316.000000,150864.000000,149125.000000,10.784398)}
{pt3dadd(152220.000000,151092.000000,149400.000000,10.784398)}
{pt3dadd(152112.000000,150828.000000,149675.000000,10.784398)}
{pt3dadd(151752.000000,150792.000000,150000.000000,20.068796)}
{pt3dadd(151620.000000,150732.000000,150325.000000,10.784398)}
{pt3dadd(151644.000000,150648.000000,150575.000000,10.784398)}
{pt3dadd(151668.000000,150564.000000,150950.000000,10.784398)}
{pt3dadd(151692.000000,150480.000000,151250.000000,20.068796)}
{pt3dadd(151716.000000,150396.000000,151550.000000,10.784398)}
{pt3dadd(151860.000000,150540.000000,151875.000000,10.784398)}
{pt3dadd(151932.000000,150564.000000,152275.000000,10.784398)}
{pt3dadd(151920.000000,150504.000000,152625.000000,20.068796)}
{pt3dadd(151908.000000,150444.000000,153025.000000,10.784398)}
{pt3dadd(151896.000000,150384.000000,153375.000000,10.784398)}
{pt3dadd(151812.000000,150372.000000,153700.000000,10.784398)}
{pt3dadd(152136.000000,150264.000000,154000.000000,19.685420)}
{pt3dadd(152304.000000,150384.000000,154375.000000,10.401022)}
{pt3dadd(152124.000000,150552.000000,154625.000000,10.401022)}
{pt3dadd(152352.000000,150444.000000,154975.000000,10.401022)}
{pt3dadd(152472.000000,150408.000000,155300.000000,21.602299)}
{pt3dadd(152412.000000,150576.000000,155575.000000,12.701277)}
{pt3dadd(152556.000000,150828.000000,155875.000000,12.701277)}
{pt3dadd(152532.000000,150876.000000,156200.000000,12.701277)}
{pt3dadd(152784.000000,151212.000000,156500.000000,25.120768)}
{pt3dadd(153156.000000,151392.000000,156825.000000,13.919491)}
{pt3dadd(153588.000000,151260.000000,157175.000000,13.919491)}
{pt3dadd(153840.000000,151584.000000,157450.000000,13.919491)}
{pt3dadd(153960.000000,151572.000000,157725.000000,25.120768)}
{pt3dadd(153804.000000,151416.000000,157975.000000,12.701277)}
{pt3dadd(153948.000000,151584.000000,158250.000000,12.701277)}
{pt3dadd(153708.000000,151404.000000,158500.000000,12.701277)}
{pt3dadd(153576.000000,151116.000000,158925.000000,25.650747)}
{pt3dadd(153672.000000,150804.000000,159200.000000,14.449470)}
{pt3dadd(153972.000000,150696.000000,159400.000000,14.449470)}
{pt3dadd(154044.000000,150432.000000,159750.000000,14.449470)}
{pt3dadd(154068.000000,150252.000000,160075.000000,22.136468)}
{pt3dadd(154368.000000,150072.000000,160450.000000,9.186998)}
{pt3dadd(154848.000000,149604.000000,160800.000000,9.186998)}
{pt3dadd(155100.000000,149700.000000,161175.000000,9.186998)}
{pt3dadd(155400.000000,149484.000000,161400.000000,22.688530)}
{pt3dadd(155652.000000,149352.000000,161650.000000,15.001532)}
{pt3dadd(156228.000000,149292.000000,161975.000000,15.001532)}
{pt3dadd(156072.000000,148872.000000,162275.000000,15.001532)}
{pt3dadd(156300.000000,148716.000000,162550.000000,27.951002)}
{pt3dadd(156468.000000,148632.000000,162900.000000,14.449470)}
{pt3dadd(156696.000000,148440.000000,162975.000000,14.449470)}
{pt3dadd(156636.000000,148248.000000,163000.000000,14.449470)}
{pt3dadd(156732.000000,148092.000000,163375.000000,30.711308)}
{pt3dadd(156852.000000,147912.000000,163825.000000,17.761838)}
{pt3dadd(157020.000000,147744.000000,163875.000000,17.761838)}
{pt3dadd(157320.000000,147540.000000,163925.000000,17.761838)}
{pt3dadd(157104.000000,147396.000000,164200.000000,31.263370)}
{pt3dadd(157044.000000,147180.000000,164400.000000,15.001532)}
{pt3dadd(157344.000000,147024.000000,164275.000000,15.001532)}
{pt3dadd(157644.000000,146808.000000,164125.000000,15.001532)}
{pt3dadd(157692.000000,146640.000000,164500.000000,26.202809)}
{pt3dadd(157740.000000,146496.000000,164875.000000,12.701277)}
{pt3dadd(157656.000000,146328.000000,165025.000000,12.701277)}
{pt3dadd(157500.000000,146136.000000,165075.000000,12.701277)}
{pt3dadd(157596.000000,146016.000000,165225.000000,23.902554)}
{pt3dadd(157848.000000,145860.000000,165450.000000,12.701277)}
{pt3dadd(157764.000000,145680.000000,165475.000000,12.701277)}
{pt3dadd(157992.000000,145500.000000,165800.000000,12.701277)}
{pt3dadd(157908.000000,145344.000000,165875.000000,23.442503)}
{pt3dadd(157824.000000,145188.000000,165950.000000,12.241225)}
{pt3dadd(158196.000000,144996.000000,165950.000000,12.241225)}
{pt3dadd(158112.000000,144852.000000,166025.000000,12.241225)}
{pt3dadd(158256.000000,144720.000000,166250.000000,23.442503)}
{pt3dadd(158196.000000,144576.000000,166650.000000,12.701277)}
{pt3dadd(158220.000000,144420.000000,166650.000000,12.701277)}
{pt3dadd(158244.000000,144252.000000,166650.000000,12.701277)}
{pt3dadd(158208.000000,144096.000000,166400.000000,23.902554)}
{pt3dadd(158376.000000,143652.000000,166625.000000,12.701277)}
{pt3dadd(158544.000000,143208.000000,166850.000000,12.701277)}
{pt3dadd(158640.000000,143100.000000,167100.000000,12.701277)}
{pt3dadd(158868.000000,142584.000000,167325.000000,26.202809)}
{pt3dadd(159132.000000,142680.000000,167575.000000,15.001532)}
{pt3dadd(159300.000000,142164.000000,167900.000000,14.901532)}
{pt3dadd(159396.000000,142080.000000,168225.000000,14.901532)}
{pt3dadd(159564.000000,141612.000000,168625.000000,29.254386)}
{pt3dadd(159672.000000,141672.000000,168850.000000,15.752854)}
{pt3dadd(159576.000000,141552.000000,169100.000000,15.752854)}
{pt3dadd(159732.000000,141204.000000,169350.000000,15.852854)}
{pt3dadd(159744.000000,140724.000000,169625.000000,29.354386)}
{pt3dadd(159864.000000,140604.000000,169875.000000,15.001532)}
{pt3dadd(159996.000000,140256.000000,170125.000000,15.001532)}
{pt3dadd(160224.000000,139980.000000,170325.000000,15.001532)}
{pt3dadd(160224.000000,139656.000000,170550.000000,27.951002)}
{pt3dadd(160188.000000,139308.000000,170800.000000,14.449470)}
{pt3dadd(160308.000000,138912.000000,171025.000000,14.449470)}
{pt3dadd(160236.000000,138684.000000,171275.000000,14.449470)}
{pt3dadd(160284.000000,138432.000000,171475.000000,27.951002)}
{pt3dadd(160236.000000,138156.000000,171725.000000,15.001532)}
{pt3dadd(160164.000000,137700.000000,172000.000000,15.001532)}
{pt3dadd(160080.000000,137244.000000,172275.000000,15.001532)}
{pt3dadd(160092.000000,136944.000000,172525.000000,28.503064)}
{pt3dadd(159972.000000,136692.000000,172800.000000,15.001532)}
{pt3dadd(159876.000000,136416.000000,173050.000000,15.001532)}
{pt3dadd(159780.000000,136140.000000,173275.000000,15.001532)}
{pt3dadd(159756.000000,136152.000000,173525.000000,28.503064)}
{pt3dadd(159660.000000,135876.000000,173750.000000,15.001532)}
{pt3dadd(159564.000000,135732.000000,174050.000000,15.001532)}
{pt3dadd(159312.000000,135864.000000,174350.000000,15.001532)}
{pt3dadd(158376.000000,135540.000000,174625.000000,26.202809)}
{pt3dadd(158184.000000,135468.000000,174875.000000,12.701277)}
{pt3dadd(158220.000000,135396.000000,175150.000000,12.701277)}
{pt3dadd(158256.000000,135324.000000,175400.000000,12.701277)}
{pt3dadd(158292.000000,135252.000000,175650.000000,23.902554)}
{pt3dadd(158328.000000,135180.000000,175900.000000,12.701277)}
{pt3dadd(158364.000000,135108.000000,176175.000000,12.701277)}
{pt3dadd(158112.000000,134856.000000,176425.000000,12.701277)}
{pt3dadd(158196.000000,134868.000000,176725.000000,23.902554)}
{pt3dadd(158280.000000,134880.000000,176975.000000,12.701277)}
{pt3dadd(158256.000000,134916.000000,177200.000000,12.701277)}
{pt3dadd(158184.000000,134928.000000,177450.000000,12.701277)}
{pt3dadd(158112.000000,134940.000000,177725.000000,23.442503)}
{pt3dadd(158196.000000,134844.000000,178000.000000,12.241225)}
{pt3dadd(158172.000000,134700.000000,178250.000000,12.241225)}
{pt3dadd(158004.000000,134628.000000,178500.000000,12.241225)}
{pt3dadd(157836.000000,134556.000000,178750.000000,23.442503)}
{pt3dadd(158052.000000,134232.000000,179025.000000,12.701277)}
{pt3dadd(157620.000000,134472.000000,179275.000000,12.701277)}
{pt3dadd(157656.000000,134484.000000,179550.000000,12.701277)}
{pt3dadd(157740.000000,134292.000000,179825.000000,24.611989)}
{pt3dadd(157824.000000,134100.000000,180050.000000,13.410712)}
{pt3dadd(157908.000000,133908.000000,180350.000000,13.410712)}
{pt3dadd(157992.000000,133716.000000,180650.000000,13.410712)}
{pt3dadd(158076.000000,133524.000000,180950.000000,24.611989)}
{pt3dadd(158160.000000,133128.000000,181250.000000,12.701277)}
{pt3dadd(158244.000000,132732.000000,181525.000000,12.701277)}
{pt3dadd(157812.000000,132840.000000,181850.000000,21.985675)}
{pt3dadd(157644.000000,132852.000000,182150.000000,221.685675)}
{pt3dadd(157524.000000,132708.000000,182450.000000,349.807330)}
{pt3dadd(157800.000000,132816.000000,182750.000000,1000.000000)}

{create adhoc9}
{access adhoc9}
{connect adhoc9(1), adhoc7(0)}
{nseg = 1}
{strdef color color = "White"}
{pt3dclear()}
{pt3dadd(187416.000000,206352.000000,84275.000000,27.732632)}
{pt3dadd(188592.000000,202884.000000,84075.000000,22.768972)}
{pt3dadd(189192.000000,201636.000000,83725.000000,14.261383)}
{pt3dadd(189492.000000,200268.000000,83450.000000,18.299255)}
{pt3dadd(189648.000000,199812.000000,83175.000000,10.784398)}
{pt3dadd(189804.000000,199356.000000,82925.000000,10.784398)}
{pt3dadd(189816.000000,198804.000000,82700.000000,10.784398)}
{pt3dadd(190116.000000,198504.000000,82425.000000,19.685420)}
{pt3dadd(190200.000000,198060.000000,82200.000000,10.401022)}
{pt3dadd(190260.000000,197784.000000,81925.000000,10.401022)}
{pt3dadd(190308.000000,197712.000000,81650.000000,10.401022)}
{pt3dadd(190140.000000,197544.000000,81350.000000,21.142247)}
{pt3dadd(189972.000000,197376.000000,81050.000000,12.241225)}
{pt3dadd(190212.000000,197076.000000,80800.000000,12.241225)}
{pt3dadd(189888.000000,196776.000000,80475.000000,12.241225)}
{pt3dadd(189768.000000,196416.000000,80200.000000,22.982451)}
{pt3dadd(189660.000000,196296.000000,79875.000000,12.241225)}
{pt3dadd(189900.000000,195684.000000,79575.000000,12.241225)}
{pt3dadd(190116.000000,194976.000000,79350.000000,12.241225)}
{pt3dadd(190320.000000,194268.000000,79100.000000,21.525623)}
{pt3dadd(190260.000000,193944.000000,78750.000000,10.784398)}
{pt3dadd(190344.000000,193752.000000,78475.000000,10.784398)}
{pt3dadd(190296.000000,193584.000000,78525.000000,10.784398)}
{pt3dadd(190200.000000,193416.000000,78375.000000,21.985675)}
{pt3dadd(190152.000000,193248.000000,78250.000000,12.701277)}
{pt3dadd(190188.000000,193020.000000,78125.000000,12.701277)}
{pt3dadd(190344.000000,192852.000000,77950.000000,12.701277)}
{pt3dadd(190356.000000,192708.000000,77850.000000,21.985675)}
{pt3dadd(190368.000000,192576.000000,77750.000000,10.784398)}
{pt3dadd(190380.000000,192396.000000,77650.000000,10.784398)}
{pt3dadd(190536.000000,192192.000000,77775.000000,10.784398)}
{pt3dadd(190596.000000,192012.000000,77500.000000,21.985675)}
{pt3dadd(190932.000000,191772.000000,77475.000000,12.701277)}
{pt3dadd(190944.000000,191544.000000,77400.000000,12.701277)}
{pt3dadd(190944.000000,191352.000000,77200.000000,12.701277)}
{pt3dadd(190920.000000,191196.000000,77300.000000,23.902554)}
{pt3dadd(190920.000000,191040.000000,77250.000000,12.701277)}
{pt3dadd(190920.000000,190848.000000,77200.000000,12.701277)}
{pt3dadd(190980.000000,190704.000000,77025.000000,12.701277)}
{pt3dadd(191244.000000,190524.000000,76975.000000,23.902554)}
{pt3dadd(191244.000000,190344.000000,76950.000000,12.701277)}
{pt3dadd(191232.000000,190176.000000,76875.000000,12.701277)}
{pt3dadd(191220.000000,190008.000000,76800.000000,12.701277)}
{pt3dadd(191376.000000,189828.000000,76625.000000,23.902554)}
{pt3dadd(191472.000000,189672.000000,76700.000000,12.701277)}
{pt3dadd(191640.000000,189516.000000,76500.000000,12.701277)}
{pt3dadd(191808.000000,189372.000000,76425.000000,23.442503)}
{pt3dadd(191832.000000,189180.000000,76475.000000,34.643780)}
{pt3dadd(191928.000000,188976.000000,76075.000000,38.070838)}
{pt3dadd(192168.000000,188808.000000,75950.000000,57.506386)}

{create adhoc10}
{access adhoc10}
{connect adhoc10(1), adhoc9(0)}
{nseg = 1}
{strdef color color = "White"}
{pt3dclear()}
{pt3dadd(192168.000000,188808.000000,75950.000000,57.506386)}
{pt3dadd(191088.000000,188808.000000,77575.000000,26.088386)}
{pt3dadd(190968.000000,188616.000000,77750.000000,16.253032)}
{pt3dadd(190944.000000,188424.000000,77925.000000,6.980779)}
{pt3dadd(190980.000000,188112.000000,78250.000000,3.429025)}
{pt3dadd(190896.000000,187668.000000,78550.000000,3.429025)}
{pt3dadd(191040.000000,187512.000000,78550.000000,3.429025)}
{pt3dadd(191004.000000,187344.000000,78525.000000,4.676958)}
{pt3dadd(190968.000000,187152.000000,78575.000000,2.747934)}
{pt3dadd(191064.000000,186996.000000,78625.000000,2.747934)}
{pt3dadd(191064.000000,186804.000000,78725.000000,2.747934)}
{pt3dadd(191160.000000,186660.000000,78875.000000,4.502203)}
{pt3dadd(191292.000000,186516.000000,79025.000000,3.254269)}
{pt3dadd(191544.000000,186372.000000,79300.000000,4.502203)}
{pt3dadd(191712.000000,186204.000000,79550.000000,5.062166)}
{pt3dadd(191820.000000,186360.000000,79750.000000,4.513162)}
{pt3dadd(192000.000000,186324.000000,79850.000000,4.299816)}

{create adhoc11}
{access adhoc11}
{connect adhoc11(1), adhoc9(0)}
{nseg = 1}
{strdef color color = "White"}
{pt3dclear()}
{pt3dadd(192168.000000,188808.000000,75950.000000,57.506386)}
{pt3dadd(192252.000000,188580.000000,76125.000000,38.837591)}
{pt3dadd(192240.000000,188328.000000,75975.000000,23.902554)}
{pt3dadd(192228.000000,188136.000000,75750.000000,21.602299)}
{pt3dadd(192492.000000,187908.000000,75500.000000,10.401022)}
{pt3dadd(192600.000000,187692.000000,75250.000000,10.401022)}
{pt3dadd(192204.000000,187512.000000,74775.000000,10.401022)}
{pt3dadd(191964.000000,187332.000000,74300.000000,19.685420)}
{pt3dadd(192204.000000,187176.000000,74225.000000,10.784398)}
{pt3dadd(192180.000000,186960.000000,73850.000000,16.030924)}
{pt3dadd(192060.000000,186744.000000,73650.000000,16.805878)}
{pt3dadd(190716.000000,186576.000000,72000.000000,11.535801)}
{pt3dadd(190896.000000,186276.000000,71800.000000,5.374770)}

{create adhoc12}
{access adhoc12}
{connect adhoc12(1), adhoc11(0)}
{nseg = 1}
{strdef color color = "White"}
{pt3dclear()}
{pt3dadd(190896.000000,186276.000000,71800.000000,5.374770)}
{pt3dadd(189876.000000,186156.000000,71050.000000,11.166032)}
{pt3dadd(190164.000000,185976.000000,70725.000000,7.299619)}
{pt3dadd(189912.000000,185712.000000,70425.000000,11.771192)}
{pt3dadd(189756.000000,185556.000000,70325.000000,10.144211)}
{pt3dadd(189828.000000,185424.000000,70275.000000,15.907018)}
{pt3dadd(189792.000000,185268.000000,70200.000000,18.488422)}

{create adhoc13}
{access adhoc13}
{connect adhoc13(1), adhoc12(0)}
{nseg = 1}
{strdef color color = "White"}
{pt3dclear()}
{pt3dadd(189792.000000,185268.000000,70200.000000,18.488422)}
{pt3dadd(190032.000000,185172.000000,69550.000000,10.942535)}
{pt3dadd(189936.000000,185028.000000,69300.000000,7.165521)}
{pt3dadd(189912.000000,184896.000000,69350.000000,6.142666)}
{pt3dadd(189720.000000,184740.000000,69200.000000,3.874829)}
{pt3dadd(189828.000000,184572.000000,69050.000000,3.874829)}
{pt3dadd(189768.000000,184416.000000,69050.000000,3.874829)}
{pt3dadd(189708.000000,184260.000000,69050.000000,6.249659)}
{pt3dadd(189756.000000,184080.000000,68975.000000,3.874829)}
{pt3dadd(189600.000000,183900.000000,68825.000000,3.874829)}
{pt3dadd(189528.000000,183732.000000,68725.000000,3.874829)}
{pt3dadd(189348.000000,183552.000000,68650.000000,5.803854)}
{pt3dadd(189132.000000,183360.000000,68375.000000,3.429025)}
{pt3dadd(189012.000000,183180.000000,68175.000000,3.429025)}
{pt3dadd(189012.000000,183000.000000,67925.000000,3.429025)}
{pt3dadd(189012.000000,182724.000000,67650.000000,5.803854)}
{pt3dadd(189012.000000,182448.000000,67275.000000,5.122763)}
{pt3dadd(189012.000000,182112.000000,66775.000000,5.444843)}
{pt3dadd(189012.000000,181776.000000,66275.000000,8.074739)}
{pt3dadd(188976.000000,181632.000000,66075.000000,3.110400)}

{create adhoc14}
{access adhoc14}
{connect adhoc14(1), adhoc12(0)}
{nseg = 1}
{strdef color color = "White"}
{pt3dclear()}
{pt3dadd(189792.000000,185268.000000,70200.000000,18.488422)}
{pt3dadd(189420.000000,185136.000000,70775.000000,9.139501)}
{pt3dadd(189180.000000,184980.000000,70800.000000,6.083701)}
{pt3dadd(188892.000000,184812.000000,71050.000000,3.281811)}
{pt3dadd(188772.000000,184620.000000,71075.000000,2.870749)}
{pt3dadd(188628.000000,184728.000000,71125.000000,3.192829)}
{pt3dadd(188484.000000,184740.000000,71675.000000,4.321382)}
{pt3dadd(188352.000000,184536.000000,71850.000000,3.110400)}

{create adhoc15}
{access adhoc15}
{connect adhoc15(1), adhoc11(0)}
{nseg = 1}
{strdef color color = "White"}
{pt3dclear()}
{pt3dadd(190896.000000,186276.000000,71800.000000,5.374770)}
{pt3dadd(192432.000000,186108.000000,73600.000000,21.460385)}
{pt3dadd(192720.000000,185880.000000,73225.000000,13.476231)}
{pt3dadd(193008.000000,185628.000000,73250.000000,23.442503)}
{pt3dadd(193020.000000,185400.000000,73200.000000,12.241225)}
{pt3dadd(193104.000000,185160.000000,72875.000000,12.241225)}
{pt3dadd(193236.000000,184968.000000,72575.000000,12.241225)}
{pt3dadd(193416.000000,184728.000000,72575.000000,23.442503)}
{pt3dadd(193596.000000,184512.000000,72700.000000,12.701277)}
{pt3dadd(193776.000000,184296.000000,72825.000000,12.701277)}
{pt3dadd(193956.000000,184104.000000,72950.000000,12.701277)}
{pt3dadd(194016.000000,183852.000000,72875.000000,21.985675)}
{pt3dadd(194076.000000,183672.000000,72800.000000,10.784398)}
{pt3dadd(194136.000000,183432.000000,72725.000000,10.784398)}
{pt3dadd(193812.000000,183168.000000,72625.000000,10.784398)}
{pt3dadd(193644.000000,182952.000000,72525.000000,20.068796)}
{pt3dadd(193776.000000,182724.000000,72625.000000,10.784398)}
{pt3dadd(193908.000000,182520.000000,72725.000000,10.784398)}
{pt3dadd(193920.000000,182292.000000,72650.000000,10.784398)}
{pt3dadd(193800.000000,182088.000000,72900.000000,20.068796)}
{pt3dadd(193656.000000,181860.000000,72950.000000,10.784398)}
{pt3dadd(193512.000000,181644.000000,73000.000000,10.784398)}
{pt3dadd(193392.000000,181476.000000,72875.000000,10.784398)}
{pt3dadd(193296.000000,181260.000000,73000.000000,19.685420)}
{pt3dadd(193428.000000,181092.000000,72700.000000,10.401022)}
{pt3dadd(193380.000000,180864.000000,72975.000000,10.401022)}
{pt3dadd(193236.000000,180672.000000,73075.000000,10.401022)}
{pt3dadd(193248.000000,180468.000000,73100.000000,19.685420)}
{pt3dadd(193260.000000,180276.000000,73125.000000,10.784398)}
{pt3dadd(193236.000000,180060.000000,73150.000000,10.784398)}
{pt3dadd(193212.000000,179892.000000,73175.000000,10.784398)}
{pt3dadd(193188.000000,179676.000000,73200.000000,21.985675)}
{pt3dadd(193608.000000,179472.000000,73100.000000,12.701277)}
{pt3dadd(193896.000000,179280.000000,72725.000000,12.701277)}
{pt3dadd(194004.000000,179064.000000,73050.000000,12.701277)}
{pt3dadd(194016.000000,178896.000000,73250.000000,21.602299)}
{pt3dadd(194028.000000,178752.000000,73450.000000,10.401022)}
{pt3dadd(194004.000000,178560.000000,73500.000000,10.401022)}
{pt3dadd(193980.000000,178392.000000,73550.000000,10.401022)}
{pt3dadd(193956.000000,178212.000000,73600.000000,19.685420)}
{pt3dadd(193932.000000,178020.000000,73650.000000,10.784398)}
{pt3dadd(193908.000000,177840.000000,73675.000000,10.784398)}
{pt3dadd(193884.000000,177648.000000,73700.000000,10.784398)}
{pt3dadd(193860.000000,177480.000000,73725.000000,20.068796)}
{pt3dadd(193836.000000,177336.000000,73750.000000,10.784398)}
{pt3dadd(193920.000000,177096.000000,73875.000000,10.784398)}
{pt3dadd(194004.000000,176916.000000,74000.000000,10.784398)}
{pt3dadd(194088.000000,176700.000000,74125.000000,20.068796)}
{pt3dadd(194172.000000,176520.000000,74225.000000,10.784398)}
{pt3dadd(194388.000000,176340.000000,74400.000000,10.784398)}
{pt3dadd(194568.000000,176124.000000,74350.000000,10.784398)}
{pt3dadd(194748.000000,175968.000000,74300.000000,20.068796)}
{pt3dadd(194928.000000,175776.000000,74250.000000,10.784398)}
{pt3dadd(195084.000000,175620.000000,74275.000000,10.784398)}
{pt3dadd(194964.000000,175440.000000,74125.000000,10.784398)}
{pt3dadd(194844.000000,175284.000000,73975.000000,20.068796)}
{pt3dadd(194856.000000,175104.000000,73825.000000,10.784398)}
{pt3dadd(194892.000000,174936.000000,73725.000000,10.784398)}
{pt3dadd(194928.000000,174708.000000,74175.000000,10.784398)}
{pt3dadd(195108.000000,174552.000000,74175.000000,21.985675)}
{pt3dadd(195288.000000,174300.000000,74175.000000,21.985675)}
{pt3dadd(195060.000000,174060.000000,74325.000000,28.341507)}
{pt3dadd(195372.000000,173892.000000,74550.000000,46.235845)}
{pt3dadd(195504.000000,173700.000000,74575.000000,33.279160)}

{create adhoc16}
{access adhoc16}
{connect adhoc16(1), adhoc15(0)}
{nseg = 1}
{strdef color color = "White"}
{pt3dclear()}
{pt3dadd(195504.000000,173700.000000,74575.000000,33.279160)}
{pt3dadd(195228.000000,173700.000000,72800.000000,19.296562)}
{pt3dadd(195132.000000,173544.000000,72675.000000,12.177937)}
{pt3dadd(195036.000000,173364.000000,72225.000000,8.361927)}
{pt3dadd(194988.000000,173160.000000,72125.000000,4.039821)}
{pt3dadd(194820.000000,172980.000000,71750.000000,4.039821)}
{pt3dadd(194748.000000,172608.000000,71275.000000,4.039821)}
{pt3dadd(194460.000000,172488.000000,70975.000000,9.286348)}
{pt3dadd(194124.000000,172380.000000,70700.000000,6.746526)}
{pt3dadd(194256.000000,172440.000000,70425.000000,6.746526)}
{pt3dadd(194100.000000,172500.000000,70100.000000,6.746526)}
{pt3dadd(193944.000000,172560.000000,69725.000000,11.068632)}
{pt3dadd(193692.000000,172524.000000,69375.000000,9.781838)}
{pt3dadd(193356.000000,172584.000000,69050.000000,12.691633)}
{pt3dadd(193104.000000,172572.000000,68750.000000,20.152722)}
{pt3dadd(192816.000000,172644.000000,68450.000000,16.048977)}

{create adhoc17}
{access adhoc17}
{connect adhoc17(1), adhoc16(0)}
{nseg = 1}
{strdef color color = "White"}
{pt3dclear()}
{pt3dadd(192816.000000,172644.000000,68450.000000,16.048977)}
{pt3dadd(191904.000000,173016.000000,68200.000000,9.564700)}
{pt3dadd(191340.000000,173184.000000,67975.000000,6.338820)}
{pt3dadd(191052.000000,173220.000000,67750.000000,4.418969)}
{pt3dadd(190824.000000,173352.000000,67475.000000,3.085740)}
{pt3dadd(190680.000000,173988.000000,67175.000000,4.142900)}
{pt3dadd(190464.000000,174456.000000,66925.000000,4.478975)}

{create adhoc18}
{access adhoc18}
{connect adhoc18(1), adhoc16(0)}
{nseg = 1}
{strdef color color = "White"}
{pt3dclear()}
{pt3dadd(192816.000000,172644.000000,68450.000000,16.048977)}
{pt3dadd(192924.000000,172500.000000,68200.000000,11.199318)}
{pt3dadd(192768.000000,172152.000000,67925.000000,7.319591)}
{pt3dadd(192648.000000,171960.000000,67675.000000,7.961550)}
{pt3dadd(192492.000000,171624.000000,67400.000000,5.051754)}
{pt3dadd(192348.000000,171288.000000,67150.000000,5.051754)}
{pt3dadd(191892.000000,171024.000000,66975.000000,5.051754)}
{pt3dadd(191856.000000,170856.000000,66700.000000,8.603509)}
{pt3dadd(191340.000000,169752.000000,66375.000000,6.395170)}
{pt3dadd(191112.000000,169488.000000,66150.000000,7.581186)}
{pt3dadd(191112.000000,169308.000000,66000.000000,11.635310)}
{pt3dadd(191148.000000,169440.000000,65800.000000,7.430082)}

{create adhoc19}
{access adhoc19}
{connect adhoc19(1), adhoc15(0)}
{nseg = 1}
{strdef color color = "White"}
{pt3dclear()}
{pt3dadd(195504.000000,173700.000000,74575.000000,33.279160)}
{pt3dadd(195648.000000,173532.000000,75100.000000,21.014899)}
{pt3dadd(195936.000000,173400.000000,75175.000000,13.208939)}
{pt3dadd(196032.000000,173256.000000,75300.000000,14.540105)}
{pt3dadd(196068.000000,173124.000000,75375.000000,9.186998)}
{pt3dadd(196104.000000,172980.000000,75350.000000,9.186998)}
{pt3dadd(196140.000000,172860.000000,75325.000000,9.186998)}
{pt3dadd(196176.000000,172728.000000,75300.000000,15.542830)}
{pt3dadd(196236.000000,172632.000000,75450.000000,7.855832)}
{pt3dadd(196428.000000,172500.000000,75500.000000,7.855832)}
{pt3dadd(196644.000000,172392.000000,75550.000000,7.855832)}
{pt3dadd(196812.000000,172272.000000,75575.000000,15.223351)}
{pt3dadd(196812.000000,172116.000000,75600.000000,8.867519)}
{pt3dadd(196776.000000,171984.000000,75700.000000,8.867519)}
{pt3dadd(197028.000000,171864.000000,75875.000000,8.867519)}
{pt3dadd(197100.000000,171744.000000,75975.000000,16.554517)}
{pt3dadd(197064.000000,171672.000000,75825.000000,9.186998)}
{pt3dadd(197136.000000,171564.000000,76025.000000,9.186998)}
{pt3dadd(197052.000000,171468.000000,76050.000000,9.186998)}
{pt3dadd(196968.000000,171336.000000,75975.000000,16.873996)}
{pt3dadd(197004.000000,171204.000000,76025.000000,9.186998)}
{pt3dadd(197040.000000,171084.000000,76150.000000,9.186998)}
{pt3dadd(197040.000000,171012.000000,76375.000000,9.186998)}
{pt3dadd(196932.000000,170928.000000,76225.000000,16.873996)}
{pt3dadd(196956.000000,170808.000000,76325.000000,9.186998)}
{pt3dadd(196956.000000,170688.000000,76200.000000,9.186998)}
{pt3dadd(197088.000000,170580.000000,76300.000000,9.186998)}
{pt3dadd(197220.000000,170484.000000,76475.000000,16.554517)}
{pt3dadd(197256.000000,170412.000000,76425.000000,8.867519)}
{pt3dadd(197388.000000,170292.000000,76225.000000,8.867519)}
{pt3dadd(197496.000000,170160.000000,76325.000000,8.867519)}
{pt3dadd(197604.000000,170040.000000,76425.000000,16.554517)}
{pt3dadd(197532.000000,169920.000000,76350.000000,9.186998)}
{pt3dadd(197460.000000,169740.000000,76275.000000,9.186998)}
{pt3dadd(197388.000000,169632.000000,76200.000000,9.186998)}
{pt3dadd(197460.000000,169512.000000,76325.000000,16.873996)}
{pt3dadd(197520.000000,169356.000000,76500.000000,9.186998)}
{pt3dadd(197580.000000,169236.000000,76700.000000,9.186998)}
{pt3dadd(197916.000000,169092.000000,76725.000000,9.186998)}
{pt3dadd(197988.000000,168876.000000,76875.000000,16.873996)}
{pt3dadd(197940.000000,168756.000000,76725.000000,9.186998)}
{pt3dadd(198036.000000,168648.000000,76775.000000,9.186998)}
{pt3dadd(198144.000000,168516.000000,76800.000000,9.186998)}
{pt3dadd(198168.000000,168360.000000,76775.000000,16.554517)}
{pt3dadd(198348.000000,168180.000000,76775.000000,8.867519)}
{pt3dadd(198420.000000,168060.000000,76925.000000,8.867519)}
{pt3dadd(198456.000000,167892.000000,76850.000000,8.867519)}
{pt3dadd(198492.000000,167724.000000,76775.000000,16.235037)}
{pt3dadd(198780.000000,167556.000000,76900.000000,8.867519)}
{pt3dadd(199068.000000,167436.000000,77000.000000,8.867519)}
{pt3dadd(199248.000000,167256.000000,77000.000000,8.867519)}
{pt3dadd(199104.000000,167112.000000,77025.000000,16.554517)}
{pt3dadd(198960.000000,166968.000000,77025.000000,9.186998)}
{pt3dadd(198984.000000,166788.000000,77075.000000,9.186998)}
{pt3dadd(198984.000000,166584.000000,76925.000000,9.186998)}
{pt3dadd(198984.000000,166404.000000,77025.000000,18.088020)}
{pt3dadd(198984.000000,166248.000000,77125.000000,10.401022)}
{pt3dadd(198984.000000,166080.000000,77225.000000,10.401022)}
{pt3dadd(198936.000000,165912.000000,77300.000000,10.401022)}
{pt3dadd(199008.000000,165768.000000,77150.000000,18.088020)}
{pt3dadd(199080.000000,165564.000000,77000.000000,9.186998)}
{pt3dadd(199152.000000,165396.000000,76850.000000,9.186998)}
{pt3dadd(199224.000000,165216.000000,76700.000000,9.186998)}
{pt3dadd(199212.000000,165036.000000,76900.000000,18.088020)}
{pt3dadd(199200.000000,164868.000000,77100.000000,10.401022)}
{pt3dadd(199224.000000,164688.000000,77175.000000,10.401022)}
{pt3dadd(199248.000000,164508.000000,77250.000000,10.401022)}
{pt3dadd(199308.000000,164328.000000,77100.000000,19.685420)}
{pt3dadd(199356.000000,164184.000000,76950.000000,10.784398)}
{pt3dadd(199164.000000,163980.000000,76975.000000,10.784398)}
{pt3dadd(198984.000000,163836.000000,77000.000000,10.784398)}
{pt3dadd(199128.000000,163656.000000,76975.000000,19.685420)}
{pt3dadd(199200.000000,163464.000000,77125.000000,10.401022)}
{pt3dadd(199236.000000,163296.000000,77150.000000,10.401022)}
{pt3dadd(199200.000000,163140.000000,77225.000000,10.401022)}
{pt3dadd(198912.000000,162984.000000,77150.000000,19.685420)}
{pt3dadd(198828.000000,162840.000000,77225.000000,10.784398)}
{pt3dadd(198864.000000,162672.000000,77300.000000,10.784398)}
{pt3dadd(199116.000000,162540.000000,77425.000000,10.784398)}
{pt3dadd(199008.000000,162408.000000,77450.000000,18.471396)}
{pt3dadd(198900.000000,162264.000000,77475.000000,9.186998)}
{pt3dadd(198792.000000,162132.000000,77500.000000,9.186998)}
{pt3dadd(198780.000000,161952.000000,77550.000000,9.186998)}
{pt3dadd(198768.000000,161772.000000,77600.000000,16.873996)}
{pt3dadd(198756.000000,161604.000000,77650.000000,9.186998)}
{pt3dadd(198744.000000,161424.000000,77700.000000,9.186998)}
{pt3dadd(198840.000000,161244.000000,77625.000000,9.186998)}
{pt3dadd(198840.000000,161076.000000,77575.000000,15.276596)}
{pt3dadd(198840.000000,160908.000000,77525.000000,7.589598)}
{pt3dadd(198840.000000,160704.000000,77475.000000,7.589598)}
{pt3dadd(198840.000000,160512.000000,77425.000000,7.589598)}
{pt3dadd(198684.000000,160308.000000,77650.000000,13.423613)}
{pt3dadd(198684.000000,160116.000000,77650.000000,7.334015)}
{pt3dadd(198684.000000,159948.000000,77650.000000,7.334015)}
{pt3dadd(198684.000000,159732.000000,77650.000000,7.334015)}
{pt3dadd(198684.000000,159588.000000,77650.000000,13.423613)}
{pt3dadd(198684.000000,159444.000000,77650.000000,7.589598)}
{pt3dadd(198684.000000,159264.000000,77650.000000,7.589598)}
{pt3dadd(198684.000000,159096.000000,77650.000000,7.589598)}
{pt3dadd(198900.000000,158904.000000,77700.000000,15.276596)}
{pt3dadd(199080.000000,158736.000000,77725.000000,9.186998)}
{pt3dadd(199176.000000,158544.000000,77650.000000,9.186998)}
{pt3dadd(199164.000000,158364.000000,77625.000000,9.186998)}
{pt3dadd(199152.000000,158196.000000,77600.000000,16.873996)}
{pt3dadd(199104.000000,157980.000000,77725.000000,9.186998)}
{pt3dadd(199068.000000,157824.000000,77825.000000,9.186998)}
{pt3dadd(199032.000000,157608.000000,77775.000000,9.186998)}
{pt3dadd(199128.000000,157440.000000,77825.000000,18.471396)}
{pt3dadd(199308.000000,157224.000000,77900.000000,10.784398)}
{pt3dadd(199116.000000,157020.000000,77925.000000,10.784398)}
{pt3dadd(199296.000000,156876.000000,77850.000000,10.784398)}
{pt3dadd(199248.000000,156708.000000,77900.000000,18.471396)}
{pt3dadd(199092.000000,156492.000000,78025.000000,9.186998)}
{pt3dadd(199308.000000,156336.000000,77950.000000,9.186998)}
{pt3dadd(199440.000000,156132.000000,77975.000000,9.186998)}
{pt3dadd(199392.000000,155940.000000,77875.000000,16.873996)}
{pt3dadd(199452.000000,155736.000000,78025.000000,9.186998)}
{pt3dadd(199500.000000,155592.000000,78200.000000,9.186998)}
{pt3dadd(199524.000000,155388.000000,78050.000000,9.186998)}
{pt3dadd(199548.000000,155196.000000,77900.000000,16.873996)}
{pt3dadd(199536.000000,155040.000000,78000.000000,9.186998)}
{pt3dadd(199740.000000,154884.000000,78025.000000,9.186998)}
{pt3dadd(199884.000000,154620.000000,77975.000000,9.186998)}
{pt3dadd(199776.000000,154404.000000,78025.000000,16.873996)}
{pt3dadd(199668.000000,154260.000000,78075.000000,9.186998)}
{pt3dadd(199512.000000,154068.000000,77975.000000,9.186998)}
{pt3dadd(199320.000000,153912.000000,78000.000000,9.186998)}
{pt3dadd(199344.000000,153708.000000,77950.000000,15.542830)}
{pt3dadd(199404.000000,153576.000000,77900.000000,7.855832)}
{pt3dadd(199248.000000,153420.000000,78000.000000,7.855832)}
{pt3dadd(199212.000000,153216.000000,78000.000000,7.855832)}
{pt3dadd(199176.000000,153048.000000,77950.000000,13.689847)}
{pt3dadd(199140.000000,152880.000000,77900.000000,7.334015)}
{pt3dadd(199104.000000,152724.000000,77850.000000,7.334015)}
{pt3dadd(199092.000000,152544.000000,77925.000000,7.334015)}
{pt3dadd(199056.000000,152340.000000,77875.000000,13.423613)}
{pt3dadd(199020.000000,152196.000000,77825.000000,7.589598)}
{pt3dadd(198984.000000,152040.000000,77875.000000,7.589598)}
{pt3dadd(198792.000000,151824.000000,77925.000000,7.589598)}
{pt3dadd(198744.000000,151644.000000,77875.000000,13.679197)}
{pt3dadd(198672.000000,151440.000000,77925.000000,7.589598)}
{pt3dadd(198600.000000,151296.000000,77825.000000,7.589598)}
{pt3dadd(198672.000000,151092.000000,77850.000000,7.589598)}
{pt3dadd(198732.000000,150924.000000,77750.000000,13.945430)}
{pt3dadd(198720.000000,150744.000000,77600.000000,7.855832)}
{pt3dadd(198672.000000,150576.000000,77600.000000,7.855832)}
{pt3dadd(198624.000000,150408.000000,77600.000000,7.855832)}
{pt3dadd(198612.000000,150204.000000,77450.000000,15.542830)}
{pt3dadd(198684.000000,150060.000000,77400.000000,9.186998)}
{pt3dadd(198756.000000,149892.000000,77350.000000,9.186998)}
{pt3dadd(198684.000000,149700.000000,77375.000000,9.186998)}
{pt3dadd(198684.000000,149520.000000,77300.000000,16.873996)}
{pt3dadd(198576.000000,149316.000000,77500.000000,15.542830)}
{pt3dadd(198540.000000,149124.000000,77450.000000,19.864935)}
{pt3dadd(198504.000000,148956.000000,77400.000000,32.108226)}
{pt3dadd(198468.000000,148800.000000,77250.000000,23.110527)}

{create adhoc20}
{access adhoc20}
{connect adhoc20(1), adhoc19(0)}
{nseg = 1}
{strdef color color = "White"}
{pt3dclear()}
{pt3dadd(198468.000000,148800.000000,77250.000000,23.110527)}
{pt3dadd(198060.000000,148800.000000,78550.000000,15.133591)}
{pt3dadd(197904.000000,148656.000000,79000.000000,8.674242)}
{pt3dadd(197508.000000,148500.000000,79575.000000,3.732480)}

{create adhoc21}
{access adhoc21}
{connect adhoc21(1), adhoc19(0)}
{nseg = 1}
{strdef color color = "White"}
{pt3dclear()}
{pt3dadd(198468.000000,148800.000000,77250.000000,23.110527)}
{pt3dadd(198744.000000,148536.000000,77100.000000,17.447720)}
{pt3dadd(198552.000000,148344.000000,77200.000000,11.068632)}
{pt3dadd(198648.000000,148152.000000,77475.000000,11.068632)}
{pt3dadd(198648.000000,147936.000000,77575.000000,5.822105)}
{pt3dadd(198684.000000,147780.000000,77625.000000,5.822105)}
{pt3dadd(198756.000000,147612.000000,77750.000000,5.822105)}
{pt3dadd(198816.000000,147456.000000,77850.000000,10.846771)}
{pt3dadd(198936.000000,147300.000000,77800.000000,6.524665)}
{pt3dadd(198996.000000,147156.000000,77950.000000,6.524665)}
{pt3dadd(198984.000000,146976.000000,78050.000000,6.524665)}
{pt3dadd(199164.000000,146796.000000,78075.000000,10.846771)}
{pt3dadd(199080.000000,146640.000000,78075.000000,5.822105)}
{pt3dadd(199008.000000,146472.000000,78175.000000,5.822105)}
{pt3dadd(199032.000000,146292.000000,78150.000000,5.822105)}
{pt3dadd(199176.000000,146148.000000,78125.000000,10.144211)}
{pt3dadd(199140.000000,145992.000000,78025.000000,5.822105)}
{pt3dadd(199188.000000,145848.000000,78075.000000,5.822105)}
{pt3dadd(199128.000000,145692.000000,78025.000000,5.822105)}
{pt3dadd(199152.000000,145560.000000,78025.000000,11.068632)}
{pt3dadd(199176.000000,145416.000000,78025.000000,6.746526)}
{pt3dadd(199176.000000,145224.000000,77850.000000,6.746526)}
{pt3dadd(199272.000000,145080.000000,77850.000000,6.746526)}
{pt3dadd(199296.000000,144936.000000,77850.000000,13.102358)}
{pt3dadd(199344.000000,144804.000000,77850.000000,7.855832)}
{pt3dadd(199392.000000,144660.000000,77850.000000,7.855832)}
{pt3dadd(199440.000000,144492.000000,77850.000000,7.855832)}
{pt3dadd(199380.000000,144324.000000,77725.000000,14.211664)}
{pt3dadd(199272.000000,144180.000000,77850.000000,7.855832)}
{pt3dadd(199248.000000,144048.000000,77875.000000,7.855832)}
{pt3dadd(199284.000000,143916.000000,77875.000000,7.855832)}
{pt3dadd(199320.000000,143784.000000,77875.000000,13.945430)}
{pt3dadd(199356.000000,143640.000000,77875.000000,7.589598)}
{pt3dadd(199368.000000,143460.000000,77850.000000,7.589598)}
{pt3dadd(199272.000000,143304.000000,77925.000000,7.589598)}
{pt3dadd(199176.000000,143160.000000,78000.000000,13.679197)}
{pt3dadd(199080.000000,143016.000000,78075.000000,7.589598)}
{pt3dadd(198984.000000,142884.000000,78150.000000,7.589598)}
{pt3dadd(199032.000000,142716.000000,78200.000000,7.589598)}
{pt3dadd(199104.000000,142596.000000,78250.000000,15.276596)}
{pt3dadd(199068.000000,142464.000000,78200.000000,9.186998)}
{pt3dadd(199044.000000,142344.000000,78175.000000,9.186998)}
{pt3dadd(199068.000000,142212.000000,78275.000000,9.186998)}
{pt3dadd(199140.000000,142092.000000,78275.000000,16.554517)}
{pt3dadd(199164.000000,141924.000000,78300.000000,8.867519)}
{pt3dadd(199020.000000,141768.000000,78525.000000,16.554517)}
{pt3dadd(199044.000000,141624.000000,78525.000000,25.838915)}
{pt3dadd(199032.000000,141480.000000,78500.000000,29.785660)}
{pt3dadd(199056.000000,141372.000000,78550.000000,47.921990)}

{create adhoc22}
{access adhoc22}
{connect adhoc22(1), adhoc21(0)}
{nseg = 1}
{strdef color color = "White"}
{pt3dclear()}
{pt3dadd(199056.000000,141372.000000,78550.000000,47.921990)}
{pt3dadd(199116.000000,141300.000000,80100.000000,20.753724)}
{pt3dadd(198996.000000,141108.000000,80225.000000,14.860131)}
{pt3dadd(198852.000000,141408.000000,80800.000000,4.513162)}
{pt3dadd(198768.000000,141504.000000,80800.000000,4.299816)}

{create adhoc23}
{access adhoc23}
{connect adhoc23(1), adhoc21(0)}
{nseg = 1}
{strdef color color = "White"}
{pt3dclear()}
{pt3dadd(199056.000000,141372.000000,78550.000000,47.921990)}
{pt3dadd(198852.000000,141144.000000,78400.000000,27.567050)}
{pt3dadd(198804.000000,140952.000000,78350.000000,17.140230)}
{pt3dadd(198684.000000,140772.000000,78300.000000,14.211664)}
{pt3dadd(198696.000000,140604.000000,78225.000000,7.855832)}
{pt3dadd(198636.000000,140448.000000,78275.000000,7.855832)}
{pt3dadd(198600.000000,140292.000000,78300.000000,7.855832)}
{pt3dadd(198600.000000,140100.000000,78225.000000,14.211664)}
{pt3dadd(198612.000000,139944.000000,78225.000000,7.855832)}
{pt3dadd(198612.000000,139764.000000,78200.000000,7.855832)}
{pt3dadd(198624.000000,139620.000000,78200.000000,7.855832)}
{pt3dadd(198636.000000,139464.000000,78200.000000,14.211664)}
{pt3dadd(198624.000000,139332.000000,78225.000000,7.855832)}
{pt3dadd(198612.000000,139176.000000,78250.000000,7.855832)}
{pt3dadd(198600.000000,139008.000000,78275.000000,7.855832)}
{pt3dadd(198564.000000,138852.000000,78150.000000,14.211664)}
{pt3dadd(198324.000000,138708.000000,78100.000000,13.102358)}
{pt3dadd(198312.000000,138540.000000,78075.000000,20.837264)}
{pt3dadd(198300.000000,138384.000000,78050.000000,27.732632)}

{create adhoc24}
{access adhoc24}
{connect adhoc24(1), adhoc23(0)}
{nseg = 1}
{strdef color color = "White"}
{pt3dclear()}
{pt3dadd(198300.000000,138384.000000,78050.000000,27.732632)}
{pt3dadd(198120.000000,138300.000000,79275.000000,12.840078)}
{pt3dadd(197880.000000,138072.000000,79600.000000,8.304047)}
{pt3dadd(197748.000000,137964.000000,79875.000000,4.305454)}
{pt3dadd(197724.000000,137832.000000,79950.000000,2.747934)}
{pt3dadd(197700.000000,137688.000000,80075.000000,2.747934)}
{pt3dadd(197664.000000,137568.000000,80625.000000,2.747934)}
{pt3dadd(197712.000000,137412.000000,80900.000000,3.995868)}
{pt3dadd(197748.000000,137244.000000,81025.000000,3.343729)}
{pt3dadd(197784.000000,137100.000000,81150.000000,3.665809)}
{pt3dadd(197820.000000,136944.000000,81275.000000,5.109681)}
{pt3dadd(197808.000000,136776.000000,81250.000000,3.110400)}

{create adhoc25}
{access adhoc25}
{connect adhoc25(1), adhoc23(0)}
{nseg = 1}
{strdef color color = "White"}
{pt3dclear()}
{pt3dadd(198300.000000,138384.000000,78050.000000,27.732632)}
{pt3dadd(198324.000000,138180.000000,77975.000000,18.988421)}
{pt3dadd(198324.000000,138000.000000,78100.000000,11.993053)}
{pt3dadd(198216.000000,137856.000000,77825.000000,10.883748)}
{pt3dadd(198192.000000,137664.000000,77975.000000,5.637221)}
{pt3dadd(198168.000000,137520.000000,77975.000000,5.637221)}
{pt3dadd(198156.000000,137376.000000,77900.000000,5.637221)}
{pt3dadd(198144.000000,137220.000000,77825.000000,9.959327)}
{pt3dadd(198012.000000,137064.000000,77875.000000,5.822105)}
{pt3dadd(197988.000000,136920.000000,77850.000000,5.822105)}
{pt3dadd(197964.000000,136776.000000,77825.000000,5.822105)}
{pt3dadd(197964.000000,136608.000000,77800.000000,10.144211)}
{pt3dadd(197880.000000,136476.000000,77800.000000,5.822105)}
{pt3dadd(197892.000000,136308.000000,77775.000000,5.822105)}
{pt3dadd(197916.000000,136164.000000,77775.000000,5.822105)}
{pt3dadd(197772.000000,136008.000000,77750.000000,10.144211)}
{pt3dadd(197628.000000,135864.000000,77750.000000,5.822105)}
{pt3dadd(197628.000000,135636.000000,77650.000000,5.822105)}
{pt3dadd(197628.000000,135468.000000,77550.000000,5.822105)}
{pt3dadd(197460.000000,135312.000000,77500.000000,11.068632)}
{pt3dadd(197460.000000,135156.000000,77425.000000,6.746526)}
{pt3dadd(197364.000000,135024.000000,77475.000000,6.746526)}
{pt3dadd(197244.000000,134892.000000,77600.000000,6.746526)}
{pt3dadd(197208.000000,134748.000000,77525.000000,11.993053)}
{pt3dadd(197172.000000,134628.000000,77450.000000,6.746526)}
{pt3dadd(197148.000000,134448.000000,77450.000000,6.746526)}
{pt3dadd(197112.000000,134316.000000,77450.000000,6.746526)}
{pt3dadd(197016.000000,134172.000000,77400.000000,11.068632)}
{pt3dadd(196956.000000,134040.000000,77375.000000,5.822105)}
{pt3dadd(196896.000000,133932.000000,77350.000000,5.822105)}
{pt3dadd(196968.000000,133776.000000,77275.000000,5.822105)}
{pt3dadd(196920.000000,133632.000000,77250.000000,9.373860)}
{pt3dadd(196788.000000,133500.000000,77300.000000,5.051754)}
{pt3dadd(196836.000000,133332.000000,77200.000000,5.051754)}
{pt3dadd(196668.000000,133140.000000,77125.000000,5.051754)}
{pt3dadd(196512.000000,132948.000000,77100.000000,8.603509)}
{pt3dadd(196356.000000,132792.000000,77075.000000,5.051754)}
{pt3dadd(196320.000000,132684.000000,77050.000000,5.051754)}
{pt3dadd(196284.000000,132564.000000,77025.000000,5.051754)}
{pt3dadd(196272.000000,132432.000000,76950.000000,11.141353)}
{pt3dadd(196260.000000,132264.000000,76875.000000,7.589598)}
{pt3dadd(196116.000000,132120.000000,76825.000000,7.589598)}
{pt3dadd(196056.000000,131976.000000,76850.000000,7.589598)}
{pt3dadd(195996.000000,131844.000000,76875.000000,12.836125)}
{pt3dadd(195852.000000,131700.000000,76850.000000,6.746526)}
{pt3dadd(195708.000000,131580.000000,76850.000000,6.746526)}
{pt3dadd(195816.000000,131472.000000,76850.000000,6.746526)}
{pt3dadd(195876.000000,131340.000000,76925.000000,10.298281)}
{pt3dadd(195792.000000,131184.000000,77050.000000,5.051754)}
{pt3dadd(195756.000000,131076.000000,77150.000000,5.051754)}
{pt3dadd(195696.000000,130968.000000,77175.000000,5.051754)}
{pt3dadd(195636.000000,130824.000000,77200.000000,8.603509)}
{pt3dadd(195576.000000,130668.000000,77225.000000,5.051754)}
{pt3dadd(195648.000000,130500.000000,77300.000000,5.051754)}
{pt3dadd(195684.000000,130344.000000,77350.000000,5.051754)}
{pt3dadd(195660.000000,130164.000000,77325.000000,9.274240)}
{pt3dadd(195636.000000,130020.000000,77300.000000,5.722486)}
{pt3dadd(195612.000000,129864.000000,77275.000000,5.722486)}
{pt3dadd(195564.000000,129708.000000,77425.000000,5.722486)}
{pt3dadd(195516.000000,129552.000000,77500.000000,9.120170)}
{pt3dadd(195492.000000,129396.000000,77500.000000,4.897684)}
{pt3dadd(195492.000000,129264.000000,77450.000000,4.897684)}
{pt3dadd(195492.000000,129120.000000,77425.000000,4.897684)}
{pt3dadd(195468.000000,128964.000000,77450.000000,8.449439)}
{pt3dadd(195444.000000,128820.000000,77475.000000,5.051754)}
{pt3dadd(195408.000000,128688.000000,77500.000000,5.051754)}
{pt3dadd(195372.000000,128544.000000,77350.000000,5.051754)}
{pt3dadd(195360.000000,128412.000000,77425.000000,8.603509)}
{pt3dadd(195504.000000,128268.000000,77350.000000,5.051754)}
{pt3dadd(195408.000000,128124.000000,77400.000000,5.051754)}
{pt3dadd(195336.000000,128028.000000,77400.000000,5.051754)}
{pt3dadd(195336.000000,127896.000000,77400.000000,8.449439)}
{pt3dadd(195300.000000,127752.000000,77400.000000,4.897684)}
{pt3dadd(195264.000000,127596.000000,77400.000000,4.897684)}
{pt3dadd(195228.000000,127464.000000,77400.000000,4.897684)}
{pt3dadd(195192.000000,127296.000000,77400.000000,8.295369)}
{pt3dadd(195120.000000,127176.000000,77500.000000,4.897684)}
{pt3dadd(195048.000000,127092.000000,77600.000000,4.897684)}
{pt3dadd(195012.000000,126924.000000,77675.000000,4.897684)}
{pt3dadd(194976.000000,126780.000000,77750.000000,9.219790)}
{pt3dadd(194940.000000,126660.000000,77775.000000,5.822105)}
{pt3dadd(194904.000000,126528.000000,77800.000000,5.822105)}
{pt3dadd(194868.000000,126396.000000,77825.000000,5.822105)}
{pt3dadd(194832.000000,126252.000000,77850.000000,10.144211)}
{pt3dadd(194796.000000,126144.000000,77875.000000,5.822105)}
{pt3dadd(194868.000000,125988.000000,77825.000000,5.822105)}
{pt3dadd(194832.000000,125868.000000,77925.000000,5.822105)}
{pt3dadd(194832.000000,125724.000000,77900.000000,10.144211)}
{pt3dadd(194832.000000,125568.000000,77875.000000,5.822105)}
{pt3dadd(194832.000000,125424.000000,77850.000000,5.822105)}
{pt3dadd(194640.000000,125268.000000,78025.000000,5.822105)}
{pt3dadd(194628.000000,125112.000000,78100.000000,11.068632)}
{pt3dadd(194616.000000,124968.000000,78175.000000,6.746526)}
{pt3dadd(194556.000000,124824.000000,78275.000000,6.746526)}
{pt3dadd(194520.000000,124668.000000,78375.000000,6.746526)}
{pt3dadd(194484.000000,124548.000000,78375.000000,11.771192)}
{pt3dadd(194472.000000,124404.000000,78325.000000,6.524665)}
{pt3dadd(194568.000000,124284.000000,78325.000000,6.524665)}
{pt3dadd(194628.000000,124152.000000,78350.000000,6.524665)}
{pt3dadd(194688.000000,124020.000000,78375.000000,10.846771)}
{pt3dadd(194748.000000,123900.000000,78400.000000,5.822105)}
{pt3dadd(194640.000000,123732.000000,78250.000000,5.822105)}
{pt3dadd(194532.000000,123600.000000,78100.000000,5.822105)}
{pt3dadd(194604.000000,123444.000000,78125.000000,10.144211)}
{pt3dadd(194616.000000,123288.000000,78150.000000,5.822105)}
{pt3dadd(194688.000000,123132.000000,78100.000000,5.822105)}
{pt3dadd(194688.000000,122976.000000,78075.000000,5.822105)}
{pt3dadd(194592.000000,122844.000000,78050.000000,9.373860)}
{pt3dadd(194616.000000,122724.000000,77975.000000,5.051754)}
{pt3dadd(194580.000000,122556.000000,78075.000000,5.051754)}
{pt3dadd(194556.000000,122412.000000,78025.000000,5.051754)}
{pt3dadd(194604.000000,122268.000000,78025.000000,8.603509)}
{pt3dadd(194616.000000,122148.000000,77975.000000,5.051754)}
{pt3dadd(194544.000000,121956.000000,78050.000000,5.051754)}
{pt3dadd(194544.000000,121776.000000,78125.000000,5.051754)}
{pt3dadd(194544.000000,121632.000000,78200.000000,8.603509)}
{pt3dadd(194556.000000,121440.000000,78175.000000,5.051754)}
{pt3dadd(194568.000000,121284.000000,78150.000000,5.051754)}
{pt3dadd(194580.000000,121116.000000,78150.000000,5.051754)}
{pt3dadd(194604.000000,120984.000000,78175.000000,8.603509)}
{pt3dadd(194592.000000,120828.000000,78125.000000,5.051754)}
{pt3dadd(194592.000000,120684.000000,78150.000000,5.051754)}
{pt3dadd(194592.000000,120552.000000,78175.000000,5.051754)}
{pt3dadd(194592.000000,120420.000000,78225.000000,8.603509)}
{pt3dadd(194592.000000,120312.000000,78275.000000,5.051754)}
{pt3dadd(194496.000000,120144.000000,78325.000000,5.051754)}
{pt3dadd(194436.000000,119988.000000,78350.000000,5.051754)}
{pt3dadd(194388.000000,119880.000000,78375.000000,7.961550)}
{pt3dadd(194340.000000,119724.000000,78400.000000,4.409795)}
{pt3dadd(194412.000000,119580.000000,78375.000000,4.409795)}
{pt3dadd(194424.000000,119460.000000,78400.000000,4.409795)}
{pt3dadd(194544.000000,119328.000000,78350.000000,7.961550)}
{pt3dadd(194508.000000,119184.000000,78375.000000,5.051754)}
{pt3dadd(194532.000000,119040.000000,78375.000000,5.051754)}
{pt3dadd(194556.000000,118920.000000,78375.000000,5.051754)}
{pt3dadd(194580.000000,118776.000000,78375.000000,8.449439)}
{pt3dadd(194592.000000,118620.000000,78325.000000,4.897684)}
{pt3dadd(194592.000000,118476.000000,78300.000000,4.897684)}
{pt3dadd(194472.000000,118344.000000,78475.000000,4.897684)}
{pt3dadd(194496.000000,118188.000000,78350.000000,8.147461)}
{pt3dadd(194436.000000,118044.000000,78375.000000,4.749777)}
{pt3dadd(194376.000000,117912.000000,78400.000000,4.749777)}
{pt3dadd(194304.000000,117780.000000,78425.000000,4.749777)}
{pt3dadd(194448.000000,117648.000000,78450.000000,9.071882)}
{pt3dadd(194376.000000,117468.000000,78450.000000,5.822105)}
{pt3dadd(194328.000000,117324.000000,78525.000000,5.822105)}
{pt3dadd(194292.000000,117144.000000,78500.000000,5.822105)}
{pt3dadd(194160.000000,117012.000000,78525.000000,10.144211)}
{pt3dadd(194100.000000,116844.000000,78575.000000,5.822105)}
{pt3dadd(194064.000000,116700.000000,78575.000000,5.822105)}
{pt3dadd(194004.000000,116580.000000,78625.000000,5.822105)}
{pt3dadd(193968.000000,116460.000000,78725.000000,8.731901)}
{pt3dadd(193884.000000,116340.000000,78750.000000,4.409795)}
{pt3dadd(193752.000000,116232.000000,78900.000000,4.409795)}
{pt3dadd(193644.000000,116112.000000,79050.000000,4.409795)}
{pt3dadd(193608.000000,116004.000000,79075.000000,7.961550)}
{pt3dadd(193596.000000,115884.000000,79100.000000,5.051754)}
{pt3dadd(193536.000000,115764.000000,79125.000000,5.051754)}
{pt3dadd(193440.000000,115656.000000,79275.000000,5.051754)}
{pt3dadd(193308.000000,115536.000000,79300.000000,8.603509)}
{pt3dadd(193224.000000,115440.000000,79350.000000,5.051754)}
{pt3dadd(193248.000000,115320.000000,79350.000000,5.051754)}
{pt3dadd(193152.000000,115188.000000,79325.000000,5.051754)}
{pt3dadd(193200.000000,115056.000000,79375.000000,8.603509)}
{pt3dadd(193140.000000,114924.000000,79350.000000,5.051754)}
{pt3dadd(193272.000000,114804.000000,79475.000000,5.051754)}
{pt3dadd(193188.000000,114660.000000,79675.000000,5.051754)}
{pt3dadd(193236.000000,114528.000000,79825.000000,7.961550)}
{pt3dadd(193248.000000,114396.000000,80075.000000,4.409795)}
{pt3dadd(193272.000000,114264.000000,80150.000000,4.409795)}
{pt3dadd(193224.000000,114108.000000,80225.000000,4.409795)}
{pt3dadd(193176.000000,113976.000000,80300.000000,6.784625)}
{pt3dadd(193200.000000,113844.000000,80375.000000,3.874829)}
{pt3dadd(193224.000000,113736.000000,80450.000000,3.874829)}
{pt3dadd(193236.000000,113604.000000,80425.000000,3.874829)}
{pt3dadd(193128.000000,113460.000000,80600.000000,6.142666)}
{pt3dadd(193128.000000,113316.000000,80700.000000,3.767836)}
{pt3dadd(193092.000000,113196.000000,80775.000000,3.767836)}
{pt3dadd(192984.000000,113076.000000,80850.000000,3.767836)}
{pt3dadd(192972.000000,112932.000000,81025.000000,5.696861)}
{pt3dadd(193020.000000,112788.000000,81125.000000,3.429025)}
{pt3dadd(192924.000000,112656.000000,81150.000000,3.429025)}
{pt3dadd(192864.000000,112548.000000,81225.000000,3.429025)}
{pt3dadd(192912.000000,112416.000000,81250.000000,5.803854)}
{pt3dadd(192984.000000,112296.000000,81325.000000,3.874829)}
{pt3dadd(192984.000000,112164.000000,81400.000000,3.874829)}
{pt3dadd(192912.000000,112044.000000,81550.000000,3.874829)}
{pt3dadd(192876.000000,111924.000000,81650.000000,6.784625)}
{pt3dadd(192888.000000,111768.000000,81725.000000,4.409795)}
{pt3dadd(192876.000000,111648.000000,81800.000000,4.409795)}
{pt3dadd(192816.000000,111516.000000,81950.000000,4.409795)}
{pt3dadd(192732.000000,111396.000000,82100.000000,7.807480)}
{pt3dadd(192660.000000,111252.000000,82325.000000,4.897684)}
{pt3dadd(192600.000000,111144.000000,82400.000000,4.897684)}
{pt3dadd(192372.000000,111012.000000,82675.000000,4.897684)}
{pt3dadd(192276.000000,110928.000000,82925.000000,8.449439)}
{pt3dadd(192156.000000,110628.000000,83125.000000,5.051754)}
{pt3dadd(192072.000000,110460.000000,83300.000000,5.051754)}
{pt3dadd(192012.000000,110280.000000,83500.000000,5.051754)}
{pt3dadd(191844.000000,110076.000000,83675.000000,9.373860)}
{pt3dadd(191652.000000,109740.000000,83925.000000,5.822105)}
{pt3dadd(191460.000000,109404.000000,84125.000000,5.822105)}
{pt3dadd(191388.000000,109284.000000,84300.000000,5.822105)}
{pt3dadd(191364.000000,109308.000000,84500.000000,10.144211)}
{pt3dadd(191376.000000,109236.000000,84700.000000,5.822105)}
{pt3dadd(191448.000000,109272.000000,84925.000000,5.822105)}
{pt3dadd(191496.000000,109272.000000,85125.000000,5.822105)}
{pt3dadd(191460.000000,109260.000000,85325.000000,8.731901)}
{pt3dadd(191520.000000,109128.000000,85500.000000,4.409795)}
{pt3dadd(191484.000000,109176.000000,85675.000000,4.409795)}
{pt3dadd(191448.000000,109224.000000,85850.000000,4.409795)}
{pt3dadd(191400.000000,109248.000000,86025.000000,6.338820)}
{pt3dadd(191436.000000,109188.000000,86200.000000,3.429025)}
{pt3dadd(191484.000000,109068.000000,86425.000000,3.429025)}
{pt3dadd(191532.000000,108996.000000,86625.000000,3.429025)}
{pt3dadd(191664.000000,109008.000000,86850.000000,5.803854)}
{pt3dadd(191772.000000,108936.000000,87100.000000,3.874829)}
{pt3dadd(191736.000000,109092.000000,87300.000000,3.874829)}
{pt3dadd(191748.000000,109152.000000,87500.000000,3.874829)}
{pt3dadd(191712.000000,109176.000000,87700.000000,6.784625)}
{pt3dadd(191796.000000,109200.000000,87900.000000,7.067943)}
{pt3dadd(191736.000000,109224.000000,88075.000000,9.977738)}
{pt3dadd(191784.000000,109332.000000,88275.000000,15.629564)}
{pt3dadd(191808.000000,109392.000000,88475.000000,16.048977)}

{create adhoc26}
{access adhoc26}
{connect adhoc26(1), adhoc25(0)}
{nseg = 1}
{strdef color color = "White"}
{pt3dclear()}
{pt3dadd(191808.000000,109392.000000,88475.000000,16.048977)}
{pt3dadd(191904.000000,110244.000000,88575.000000,8.945526)}
{pt3dadd(191700.000000,111072.000000,88775.000000,5.967316)}
{pt3dadd(191748.000000,111660.000000,89000.000000,4.811789)}
{pt3dadd(191868.000000,111804.000000,89025.000000,3.254269)}
{pt3dadd(191832.000000,111960.000000,89050.000000,3.254269)}
{pt3dadd(191820.000000,112092.000000,89175.000000,3.254269)}
{pt3dadd(191808.000000,112224.000000,89250.000000,4.811789)}
{pt3dadd(191940.000000,112344.000000,89225.000000,3.057520)}
{pt3dadd(191928.000000,112500.000000,89225.000000,3.057520)}
{pt3dadd(191916.000000,112632.000000,89250.000000,3.057520)}
{pt3dadd(191940.000000,112800.000000,89275.000000,4.243537)}
{pt3dadd(191976.000000,112932.000000,89300.000000,2.686016)}
{pt3dadd(192060.000000,113076.000000,89350.000000,2.686016)}
{pt3dadd(191952.000000,113232.000000,89400.000000,2.686016)}
{pt3dadd(191808.000000,113364.000000,89275.000000,5.060846)}
{pt3dadd(191940.000000,113496.000000,89025.000000,3.874829)}
{pt3dadd(191856.000000,113616.000000,89025.000000,3.874829)}
{pt3dadd(191760.000000,113736.000000,88775.000000,4.763643)}
{pt3dadd(191796.000000,113808.000000,88575.000000,4.982043)}
{pt3dadd(191868.000000,113940.000000,89075.000000,3.345355)}
{pt3dadd(191916.000000,114072.000000,89175.000000,2.592000)}

{create adhoc27}
{access adhoc27}
{connect adhoc27(1), adhoc25(0)}
{nseg = 1}
{strdef color color = "White"}
{pt3dclear()}
{pt3dadd(191808.000000,109392.000000,88475.000000,16.048977)}
{pt3dadd(191412.000000,108948.000000,88725.000000,8.945526)}
{pt3dadd(191208.000000,108888.000000,89025.000000,5.967316)}
{pt3dadd(191112.000000,108708.000000,89275.000000,4.986545)}
{pt3dadd(191040.000000,108696.000000,89500.000000,3.429025)}
{pt3dadd(190668.000000,108600.000000,89725.000000,3.429025)}
{pt3dadd(190584.000000,108552.000000,89975.000000,3.429025)}
{pt3dadd(190440.000000,108516.000000,90175.000000,5.268888)}
{pt3dadd(190488.000000,108564.000000,90375.000000,3.339864)}
{pt3dadd(190416.000000,108564.000000,90575.000000,3.339864)}
{pt3dadd(190380.000000,108504.000000,90800.000000,3.339864)}
{pt3dadd(190212.000000,108396.000000,91025.000000,4.114818)}
{pt3dadd(190164.000000,108336.000000,91250.000000,2.274954)}
{pt3dadd(190104.000000,108252.000000,91475.000000,3.264899)}
{pt3dadd(190140.000000,108312.000000,91675.000000,3.711395)}
{pt3dadd(190224.000000,108420.000000,91900.000000,3.894068)}
{pt3dadd(190284.000000,108552.000000,92100.000000,3.732480)}

{create adhoc28}
{access adhoc28}
{connect adhoc28(1), adhoc6(0)}
{nseg = 1}
{strdef color color = "White"}
{pt3dclear()}
{pt3dadd(182436.000000,212688.000000,80275.000000,66.247350)}
{pt3dadd(182304.000000,216000.000000,81875.000000,30.285959)}
{pt3dadd(182160.000000,216144.000000,81725.000000,18.771575)}
{pt3dadd(181980.000000,216492.000000,81925.000000,9.959327)}
{pt3dadd(181812.000000,216612.000000,81700.000000,5.637221)}
{pt3dadd(181656.000000,216936.000000,81625.000000,5.637221)}
{pt3dadd(181440.000000,217260.000000,81650.000000,5.637221)}
{pt3dadd(181272.000000,217560.000000,81625.000000,8.547017)}
{pt3dadd(181056.000000,217476.000000,81525.000000,4.409795)}
{pt3dadd(180864.000000,217620.000000,81475.000000,4.409795)}
{pt3dadd(180684.000000,217836.000000,81425.000000,4.409795)}
{pt3dadd(180516.000000,218052.000000,81375.000000,6.784625)}
{pt3dadd(180336.000000,218040.000000,81200.000000,3.874829)}
{pt3dadd(180156.000000,218388.000000,81150.000000,3.874829)}
{pt3dadd(179964.000000,218688.000000,81075.000000,3.874829)}
{pt3dadd(179796.000000,218688.000000,81000.000000,6.784625)}
{pt3dadd(179568.000000,218580.000000,81125.000000,4.409795)}
{pt3dadd(179364.000000,218628.000000,80825.000000,4.409795)}
{pt3dadd(179160.000000,219096.000000,80725.000000,4.409795)}
{pt3dadd(178992.000000,219384.000000,80950.000000,7.319591)}
{pt3dadd(178812.000000,219768.000000,80775.000000,4.409795)}
{pt3dadd(178668.000000,219864.000000,80700.000000,4.409795)}
{pt3dadd(178524.000000,219924.000000,80775.000000,4.409795)}
{pt3dadd(178344.000000,220188.000000,80600.000000,7.319591)}
{pt3dadd(178188.000000,220368.000000,80500.000000,4.409795)}
{pt3dadd(178020.000000,220380.000000,80400.000000,4.409795)}
{pt3dadd(177840.000000,220488.000000,80475.000000,4.409795)}
{pt3dadd(177684.000000,220500.000000,80350.000000,7.961550)}
{pt3dadd(177540.000000,220512.000000,80350.000000,5.051754)}
{pt3dadd(177348.000000,220860.000000,80225.000000,5.051754)}
{pt3dadd(177192.000000,221076.000000,80325.000000,5.051754)}
{pt3dadd(177000.000000,221112.000000,80375.000000,9.373860)}
{pt3dadd(176832.000000,221208.000000,80100.000000,5.822105)}
{pt3dadd(176700.000000,221256.000000,80275.000000,11.068632)}
{pt3dadd(176496.000000,221292.000000,80100.000000,16.315158)}
{pt3dadd(176328.000000,221508.000000,79875.000000,18.988421)}
{pt3dadd(176148.000000,221508.000000,79875.000000,27.732632)}

{create adhoc29}
{access adhoc29}
{connect adhoc29(1), adhoc28(0)}
{nseg = 1}
{strdef color color = "White"}
{pt3dclear()}
{pt3dadd(176148.000000,221508.000000,79875.000000,27.732632)}
{pt3dadd(176040.000000,221604.000000,81150.000000,12.324100)}
{pt3dadd(175872.000000,221940.000000,81200.000000,7.994460)}
{pt3dadd(175668.000000,222036.000000,81375.000000,4.305454)}
{pt3dadd(175488.000000,222156.000000,81525.000000,3.057520)}
{pt3dadd(175308.000000,222168.000000,81600.000000,3.057520)}
{pt3dadd(175128.000000,222228.000000,81575.000000,3.057520)}
{pt3dadd(175068.000000,222432.000000,81775.000000,4.986545)}
{pt3dadd(174696.000000,222816.000000,82075.000000,5.358049)}
{pt3dadd(174564.000000,222924.000000,82325.000000,7.930082)}
{pt3dadd(174324.000000,223308.000000,82550.000000,11.145123)}

{create adhoc30}
{access adhoc30}
{connect adhoc30(1), adhoc29(0)}
{nseg = 1}
{strdef color color = "White"}
{pt3dclear()}
{pt3dadd(174324.000000,223308.000000,82550.000000,11.145123)}
{pt3dadd(174924.000000,223032.000000,82650.000000,7.109109)}
{pt3dadd(174888.000000,222948.000000,82825.000000,4.430868)}
{pt3dadd(174864.000000,222948.000000,82975.000000,3.110400)}

{create adhoc31}
{access adhoc31}
{connect adhoc31(1), adhoc29(0)}
{nseg = 1}
{strdef color color = "White"}
{pt3dclear()}
{pt3dadd(174324.000000,223308.000000,82550.000000,11.145123)}
{pt3dadd(174276.000000,223476.000000,82775.000000,7.930082)}
{pt3dadd(174048.000000,223704.000000,83000.000000,8.139453)}
{pt3dadd(173916.000000,224028.000000,83200.000000,8.139453)}
{pt3dadd(173928.000000,224076.000000,83400.000000,9.350714)}
{pt3dadd(174264.000000,224040.000000,83650.000000,11.145123)}

{create adhoc32}
{access adhoc32}
{connect adhoc32(1), adhoc31(0)}
{nseg = 1}
{strdef color color = "White"}
{pt3dclear()}
{pt3dadd(174264.000000,224040.000000,83650.000000,11.145123)}
{pt3dadd(174864.000000,224004.000000,83900.000000,6.939903)}
{pt3dadd(174864.000000,224112.000000,84075.000000,5.374770)}

{create adhoc33}
{access adhoc33}
{connect adhoc33(1), adhoc31(0)}
{nseg = 1}
{strdef color color = "White"}
{pt3dclear()}
{pt3dadd(174264.000000,224040.000000,83650.000000,11.145123)}
{pt3dadd(173760.000000,224316.000000,83525.000000,7.781480)}
{pt3dadd(173700.000000,224520.000000,83500.000000,5.268888)}
{pt3dadd(173664.000000,224688.000000,83725.000000,4.114817)}
{pt3dadd(173568.000000,224820.000000,83875.000000,2.274954)}
{pt3dadd(173484.000000,224952.000000,83950.000000,2.274954)}
{pt3dadd(173328.000000,225408.000000,84125.000000,2.274954)}
{pt3dadd(173172.000000,225684.000000,84350.000000,3.522888)}
{pt3dadd(173148.000000,225876.000000,84575.000000,2.747934)}
{pt3dadd(173220.000000,226284.000000,84725.000000,2.747934)}
{pt3dadd(173268.000000,226632.000000,84925.000000,2.747934)}
{pt3dadd(173316.000000,226752.000000,85000.000000,3.995868)}
{pt3dadd(173232.000000,226896.000000,85000.000000,2.747934)}
{pt3dadd(173208.000000,227040.000000,85050.000000,2.747934)}
{pt3dadd(173196.000000,227184.000000,85125.000000,2.747934)}
{pt3dadd(173124.000000,227328.000000,85125.000000,4.231153)}
{pt3dadd(173064.000000,227448.000000,85150.000000,2.983220)}
{pt3dadd(172944.000000,227568.000000,85225.000000,2.983220)}
{pt3dadd(172980.000000,227700.000000,85275.000000,2.983220)}
{pt3dadd(172920.000000,227844.000000,85325.000000,3.921567)}
{pt3dadd(172908.000000,227976.000000,85400.000000,2.884843)}
{pt3dadd(172860.000000,228120.000000,85350.000000,3.301479)}
{pt3dadd(172944.000000,228708.000000,85175.000000,4.502465)}
{pt3dadd(172836.000000,229032.000000,85000.000000,3.583180)}

{create adhoc34}
{access adhoc34}
{connect adhoc34(1), adhoc28(0)}
{nseg = 1}
{strdef color color = "White"}
{pt3dclear()}
{pt3dadd(176148.000000,221508.000000,79875.000000,27.732632)}
{pt3dadd(175800.000000,221796.000000,79600.000000,18.988421)}
{pt3dadd(175584.000000,222024.000000,79350.000000,11.993053)}
{pt3dadd(175260.000000,222252.000000,79075.000000,11.068632)}
{pt3dadd(175056.000000,222312.000000,78975.000000,5.822105)}
{pt3dadd(174888.000000,222456.000000,78850.000000,5.822105)}
{pt3dadd(174732.000000,222600.000000,78875.000000,5.822105)}
{pt3dadd(174552.000000,222732.000000,78775.000000,9.373860)}
{pt3dadd(174372.000000,222864.000000,78475.000000,5.051754)}
{pt3dadd(174192.000000,222888.000000,78475.000000,5.051754)}
{pt3dadd(174036.000000,222960.000000,78475.000000,5.051754)}
{pt3dadd(173868.000000,223032.000000,78375.000000,9.373860)}
{pt3dadd(173724.000000,223104.000000,78275.000000,7.379626)}
{pt3dadd(173604.000000,223440.000000,78775.000000,11.299376)}
{pt3dadd(173472.000000,223620.000000,78950.000000,9.287602)}

{create adhoc35}
{access adhoc35}
{connect adhoc35(1), adhoc34(0)}
{nseg = 1}
{strdef color color = "White"}
{pt3dclear()}
{pt3dadd(173472.000000,223620.000000,78950.000000,9.287602)}
{pt3dadd(173352.000000,225108.000000,79725.000000,6.567900)}
{pt3dadd(173016.000000,226560.000000,80025.000000,4.540740)}
{pt3dadd(172884.000000,227052.000000,80200.000000,5.358049)}
{pt3dadd(172752.000000,227376.000000,80300.000000,3.874829)}
{pt3dadd(172644.000000,227820.000000,80450.000000,3.874829)}
{pt3dadd(172488.000000,228168.000000,80525.000000,3.874829)}
{pt3dadd(172332.000000,228276.000000,80775.000000,6.142666)}
{pt3dadd(172152.000000,228684.000000,80825.000000,3.767836)}
{pt3dadd(172020.000000,228912.000000,80975.000000,3.767836)}
{pt3dadd(171888.000000,229236.000000,81025.000000,3.767836)}
{pt3dadd(171744.000000,229248.000000,81100.000000,6.677632)}
{pt3dadd(171612.000000,229260.000000,81175.000000,4.409795)}
{pt3dadd(171480.000000,229416.000000,81200.000000,4.409795)}
{pt3dadd(171336.000000,229476.000000,81300.000000,4.409795)}
{pt3dadd(171180.000000,229560.000000,81425.000000,7.319591)}
{pt3dadd(171060.000000,229884.000000,81825.000000,4.409795)}
{pt3dadd(170928.000000,230208.000000,82075.000000,4.409795)}
{pt3dadd(170772.000000,230376.000000,82175.000000,4.409795)}
{pt3dadd(170880.000000,230712.000000,82375.000000,6.784625)}
{pt3dadd(170592.000000,231180.000000,82600.000000,6.142666)}
{pt3dadd(170604.000000,231300.000000,82575.000000,9.237776)}
{pt3dadd(170616.000000,231492.000000,82525.000000,12.839182)}

{create adhoc36}
{access adhoc36}
{connect adhoc36(1), adhoc34(0)}
{nseg = 1}
{strdef color color = "White"}
{pt3dclear()}
{pt3dadd(173472.000000,223620.000000,78950.000000,9.287602)}
{pt3dadd(173316.000000,223236.000000,78075.000000,11.299376)}
{pt3dadd(173136.000000,223200.000000,77225.000000,7.379626)}
{pt3dadd(172956.000000,223116.000000,77100.000000,9.373860)}
{pt3dadd(172824.000000,223128.000000,76850.000000,5.051754)}
{pt3dadd(172692.000000,223092.000000,76650.000000,5.051754)}
{pt3dadd(172560.000000,223224.000000,76525.000000,5.051754)}
{pt3dadd(172416.000000,223356.000000,76325.000000,9.373860)}
{pt3dadd(172332.000000,223452.000000,76025.000000,5.822105)}
{pt3dadd(172224.000000,223644.000000,75800.000000,5.822105)}
{pt3dadd(172080.000000,223872.000000,75525.000000,5.822105)}
{pt3dadd(172056.000000,224040.000000,75325.000000,11.068632)}
{pt3dadd(171936.000000,224376.000000,75050.000000,6.746526)}
{pt3dadd(171744.000000,224472.000000,74850.000000,6.746526)}
{pt3dadd(171636.000000,224448.000000,74675.000000,6.746526)}
{pt3dadd(171492.000000,224676.000000,74475.000000,11.993053)}
{pt3dadd(171408.000000,224904.000000,74225.000000,6.746526)}
{pt3dadd(171432.000000,225048.000000,74000.000000,6.746526)}
{pt3dadd(171048.000000,225792.000000,73725.000000,6.746526)}
{pt3dadd(170052.000000,226872.000000,73525.000000,11.993053)}
{pt3dadd(169896.000000,227088.000000,73425.000000,6.746526)}
{pt3dadd(169728.000000,227256.000000,73400.000000,6.746526)}
{pt3dadd(169608.000000,227424.000000,73375.000000,6.746526)}
{pt3dadd(169488.000000,227592.000000,73350.000000,10.298281)}
{pt3dadd(169356.000000,227712.000000,73375.000000,5.051754)}
{pt3dadd(169212.000000,227832.000000,73375.000000,5.051754)}
{pt3dadd(169092.000000,227940.000000,73300.000000,5.051754)}
{pt3dadd(168960.000000,228120.000000,73300.000000,9.188976)}
{pt3dadd(168840.000000,228300.000000,73300.000000,5.637221)}
{pt3dadd(168708.000000,228552.000000,73350.000000,5.637221)}
{pt3dadd(168564.000000,228852.000000,73475.000000,5.637221)}
{pt3dadd(168468.000000,228984.000000,73575.000000,7.566246)}
{pt3dadd(168480.000000,229128.000000,73675.000000,3.429025)}
{pt3dadd(168492.000000,229284.000000,73725.000000,5.696861)}
{pt3dadd(168480.000000,229452.000000,73750.000000,6.882877)}
{pt3dadd(168468.000000,229596.000000,73775.000000,7.256421)}
{pt3dadd(168516.000000,229704.000000,74000.000000,7.430082)}

{create adhoc37}
{access adhoc37}
{connect adhoc37(1), adhoc36(0)}
{nseg = 1}
{strdef color color = "White"}
{pt3dclear()}
{pt3dadd(168516.000000,229704.000000,74000.000000,7.430082)}
{pt3dadd(168816.000000,229800.000000,74525.000000,5.556584)}
{pt3dadd(169032.000000,229956.000000,74825.000000,5.491471)}
{pt3dadd(169092.000000,230100.000000,74950.000000,4.901249)}
{pt3dadd(169080.000000,229980.000000,75225.000000,5.088859)}
{pt3dadd(169104.000000,229992.000000,75475.000000,4.478975)}

{create adhoc38}
{access adhoc38}
{connect adhoc38(1), adhoc36(0)}
{nseg = 1}
{strdef color color = "White"}
{pt3dclear()}
{pt3dadd(168516.000000,229704.000000,74000.000000,7.430082)}
{pt3dadd(168204.000000,229812.000000,73775.000000,7.434743)}
{pt3dadd(168120.000000,229944.000000,73675.000000,5.060846)}
{pt3dadd(167808.000000,230076.000000,73550.000000,6.142666)}
{pt3dadd(167868.000000,230196.000000,73500.000000,6.142666)}
{pt3dadd(167772.000000,230316.000000,73425.000000,8.071690)}
{pt3dadd(167676.000000,230460.000000,73500.000000,12.452817)}
{pt3dadd(167652.000000,230616.000000,73450.000000,11.145123)}

{create adhoc39}
{access adhoc39}
{connect adhoc39(1), adhoc5(0)}
{nseg = 1}
{strdef color color = "White"}
{pt3dclear()}
{pt3dadd(172272.000000,216204.000000,68775.000000,17.748884)}
{pt3dadd(172836.000000,215676.000000,68050.000000,12.835885)}
{pt3dadd(172644.000000,215244.000000,67750.000000,8.301531)}
{pt3dadd(172464.000000,215244.000000,67475.000000,8.603509)}
{pt3dadd(172308.000000,214944.000000,67225.000000,5.051754)}
{pt3dadd(172104.000000,214788.000000,67025.000000,5.051754)}
{pt3dadd(172152.000000,214680.000000,66825.000000,5.051754)}
{pt3dadd(172176.000000,214524.000000,66600.000000,10.298281)}
{pt3dadd(172020.000000,214344.000000,66375.000000,6.746526)}
{pt3dadd(172044.000000,214272.000000,66150.000000,6.746526)}
{pt3dadd(171840.000000,214548.000000,65875.000000,6.746526)}
{pt3dadd(171720.000000,214548.000000,65600.000000,11.068632)}
{pt3dadd(171756.000000,214392.000000,65325.000000,10.144211)}
{pt3dadd(171720.000000,214464.000000,65125.000000,13.695965)}
{pt3dadd(171708.000000,214380.000000,64875.000000,21.826609)}
{pt3dadd(171564.000000,213912.000000,64750.000000,19.258772)}

{create adhoc40}
{access adhoc40}
{connect adhoc40(1), adhoc39(0)}
{nseg = 1}
{strdef color color = "White"}
{pt3dclear()}
{pt3dadd(171564.000000,213912.000000,64750.000000,19.258772)}
{pt3dadd(171108.000000,213180.000000,64725.000000,11.149388)}
{pt3dadd(170856.000000,213120.000000,64550.000000,5.973958)}
{pt3dadd(170004.000000,213060.000000,64350.000000,3.732480)}

{create adhoc41}
{access adhoc41}
{connect adhoc41(1), adhoc39(0)}
{nseg = 1}
{strdef color color = "White"}
{pt3dclear()}
{pt3dadd(171564.000000,213912.000000,64750.000000,19.258772)}
{pt3dadd(171588.000000,214308.000000,64550.000000,13.339181)}
{pt3dadd(171600.000000,214080.000000,64300.000000,8.603509)}
{pt3dadd(171564.000000,214044.000000,64075.000000,8.603509)}
{pt3dadd(171420.000000,213828.000000,63875.000000,5.051754)}
{pt3dadd(171372.000000,213840.000000,63700.000000,8.603509)}
{pt3dadd(171420.000000,213708.000000,63475.000000,12.155263)}
{pt3dadd(171420.000000,213636.000000,63225.000000,13.339181)}
{pt3dadd(171336.000000,213492.000000,63000.000000,19.258772)}

{create adhoc42}
{access adhoc42}
{connect adhoc42(1), adhoc41(0)}
{nseg = 1}
{strdef color color = "White"}
{pt3dclear()}
{pt3dadd(171336.000000,213492.000000,63000.000000,19.258772)}
{pt3dadd(170964.000000,211968.000000,63125.000000,9.891623)}
{pt3dadd(170832.000000,211800.000000,63150.000000,6.534974)}
{pt3dadd(170832.000000,211620.000000,63200.000000,3.921567)}
{pt3dadd(170940.000000,211428.000000,63325.000000,3.213301)}
{pt3dadd(171024.000000,211236.000000,63200.000000,3.809096)}
{pt3dadd(171144.000000,211056.000000,63225.000000,5.348493)}
{pt3dadd(171180.000000,210888.000000,63175.000000,4.478975)}

{create adhoc43}
{access adhoc43}
{connect adhoc43(1), adhoc41(0)}
{nseg = 1}
{strdef color color = "White"}
{pt3dclear()}
{pt3dadd(171336.000000,213492.000000,63000.000000,19.258772)}
{pt3dadd(171300.000000,213324.000000,62750.000000,12.269250)}
{pt3dadd(171300.000000,213192.000000,62475.000000,7.961550)}
{pt3dadd(171360.000000,213024.000000,62250.000000,6.784625)}
{pt3dadd(171384.000000,212940.000000,62025.000000,3.874829)}
{pt3dadd(171372.000000,212760.000000,61800.000000,3.874829)}
{pt3dadd(171372.000000,212676.000000,61600.000000,3.874829)}
{pt3dadd(171156.000000,212376.000000,61350.000000,5.803854)}
{pt3dadd(170916.000000,212292.000000,61100.000000,3.429025)}
{pt3dadd(170640.000000,212208.000000,61100.000000,3.429025)}
{pt3dadd(170604.000000,212100.000000,61000.000000,3.429025)}
{pt3dadd(170604.000000,211956.000000,60925.000000,6.210428)}
{pt3dadd(170100.000000,211788.000000,60750.000000,4.281404)}
{pt3dadd(169908.000000,211644.000000,60900.000000,4.281404)}
{pt3dadd(169704.000000,211524.000000,60700.000000,4.281404)}
{pt3dadd(169560.000000,211416.000000,60750.000000,6.656233)}
{pt3dadd(169392.000000,211248.000000,60625.000000,3.874829)}
{pt3dadd(169212.000000,211656.000000,60600.000000,3.874829)}
{pt3dadd(169032.000000,211812.000000,60750.000000,3.874829)}
{pt3dadd(168864.000000,212040.000000,60750.000000,6.249659)}
{pt3dadd(168756.000000,212160.000000,60700.000000,3.874829)}
{pt3dadd(168636.000000,212220.000000,60800.000000,3.874829)}
{pt3dadd(168504.000000,212376.000000,60975.000000,3.874829)}
{pt3dadd(168372.000000,212316.000000,61025.000000,6.249659)}
{pt3dadd(168264.000000,212424.000000,60950.000000,3.874829)}
{pt3dadd(168120.000000,212568.000000,60975.000000,3.874829)}
{pt3dadd(167976.000000,212736.000000,61050.000000,3.874829)}
{pt3dadd(167832.000000,212904.000000,61150.000000,5.803854)}
{pt3dadd(167700.000000,212892.000000,61125.000000,3.429025)}
{pt3dadd(167556.000000,212880.000000,61100.000000,3.429025)}
{pt3dadd(167436.000000,212940.000000,61200.000000,3.429025)}
{pt3dadd(167316.000000,213000.000000,61300.000000,4.676958)}
{pt3dadd(167184.000000,213060.000000,61400.000000,2.747934)}
{pt3dadd(167028.000000,213060.000000,61550.000000,2.747934)}
{pt3dadd(166944.000000,213204.000000,61450.000000,2.747934)}
{pt3dadd(166884.000000,213336.000000,61425.000000,4.305454)}
{pt3dadd(166728.000000,213084.000000,61500.000000,3.057520)}
{pt3dadd(166560.000000,212988.000000,61350.000000,3.057520)}
{pt3dadd(166356.000000,212928.000000,61325.000000,3.057520)}
{pt3dadd(166080.000000,212976.000000,61325.000000,4.047465)}
{pt3dadd(165900.000000,212916.000000,61325.000000,2.489945)}
{pt3dadd(165684.000000,212952.000000,61400.000000,2.489945)}
{pt3dadd(165528.000000,212940.000000,61425.000000,2.489945)}
{pt3dadd(165384.000000,213060.000000,61425.000000,3.221901)}
{pt3dadd(165216.000000,213168.000000,61400.000000,2.231956)}
{pt3dadd(165072.000000,213204.000000,61375.000000,2.231956)}
{pt3dadd(164916.000000,213120.000000,61375.000000,2.231956)}
{pt3dadd(164640.000000,213108.000000,61375.000000,3.170303)}
{pt3dadd(164124.000000,213204.000000,61375.000000,2.438347)}
{pt3dadd(163728.000000,213156.000000,61375.000000,2.438347)}
{pt3dadd(163392.000000,213024.000000,61375.000000,2.438347)}
{pt3dadd(162816.000000,212904.000000,61375.000000,4.367372)}
{pt3dadd(162660.000000,212964.000000,61400.000000,3.429025)}
{pt3dadd(162528.000000,212988.000000,61375.000000,3.429025)}
{pt3dadd(162420.000000,212964.000000,61375.000000,3.429025)}
{pt3dadd(162300.000000,212940.000000,61375.000000,4.912244)}
{pt3dadd(162168.000000,212916.000000,61375.000000,2.983220)}
{pt3dadd(162024.000000,212928.000000,61350.000000,2.983220)}
{pt3dadd(161868.000000,213000.000000,61300.000000,2.983220)}
{pt3dadd(161736.000000,213036.000000,61300.000000,3.973164)}
{pt3dadd(161580.000000,212988.000000,61325.000000,2.489945)}
{pt3dadd(161472.000000,212940.000000,61350.000000,2.489945)}
{pt3dadd(161340.000000,212892.000000,61375.000000,2.489945)}
{pt3dadd(161220.000000,212844.000000,61400.000000,4.864774)}
{pt3dadd(161088.000000,212796.000000,61425.000000,3.874829)}
{pt3dadd(160920.000000,212748.000000,61450.000000,3.874829)}
{pt3dadd(160764.000000,212700.000000,61475.000000,5.358049)}
{pt3dadd(160620.000000,212652.000000,61500.000000,5.953844)}
{pt3dadd(160968.000000,212424.000000,61425.000000,4.965024)}
{pt3dadd(160944.000000,212232.000000,61325.000000,4.478975)}

{create adhoc44}
{access adhoc44}
{connect adhoc44(1), adhoc4(0)}
{nseg = 1}
{strdef color color = "White"}
{pt3dclear()}
{pt3dadd(170268.000000,219780.000000,69150.000000,33.279160)}
{pt3dadd(169128.000000,219900.000000,69725.000000,18.012644)}
{pt3dadd(168780.000000,220056.000000,69850.000000,11.407586)}
{pt3dadd(168660.000000,220188.000000,70000.000000,8.603509)}
{pt3dadd(168456.000000,220320.000000,70025.000000,5.051754)}
{pt3dadd(168312.000000,220452.000000,70175.000000,5.051754)}
{pt3dadd(168156.000000,220428.000000,70325.000000,5.051754)}
{pt3dadd(168000.000000,220512.000000,70325.000000,7.961550)}
{pt3dadd(167904.000000,220500.000000,70350.000000,4.409795)}
{pt3dadd(167808.000000,220524.000000,70350.000000,4.409795)}
{pt3dadd(167700.000000,220656.000000,70325.000000,4.409795)}
{pt3dadd(167568.000000,220704.000000,70350.000000,6.677632)}
{pt3dadd(167448.000000,220728.000000,70400.000000,3.767836)}
{pt3dadd(167328.000000,220752.000000,70350.000000,3.767836)}
{pt3dadd(167232.000000,220800.000000,70300.000000,3.767836)}
{pt3dadd(167148.000000,220788.000000,70375.000000,6.035673)}
{pt3dadd(167052.000000,220920.000000,70350.000000,3.767836)}
{pt3dadd(166956.000000,220920.000000,70375.000000,3.767836)}
{pt3dadd(166836.000000,220872.000000,70400.000000,3.767836)}
{pt3dadd(166740.000000,220824.000000,70425.000000,5.607700)}
{pt3dadd(166620.000000,220812.000000,70375.000000,3.339864)}
{pt3dadd(166524.000000,220884.000000,70500.000000,3.339864)}
{pt3dadd(166416.000000,220848.000000,70525.000000,3.339864)}
{pt3dadd(166308.000000,220848.000000,70500.000000,5.268888)}
{pt3dadd(166188.000000,220848.000000,70475.000000,3.429025)}
{pt3dadd(166092.000000,220860.000000,70525.000000,3.429025)}
{pt3dadd(165984.000000,220896.000000,70525.000000,3.429025)}
{pt3dadd(165876.000000,220896.000000,70650.000000,5.358049)}
{pt3dadd(165768.000000,220776.000000,70625.000000,3.429025)}
{pt3dadd(165672.000000,220824.000000,70625.000000,3.429025)}
{pt3dadd(165552.000000,220872.000000,70625.000000,3.429025)}
{pt3dadd(165408.000000,220908.000000,70625.000000,5.803854)}
{pt3dadd(165312.000000,220812.000000,70750.000000,3.874829)}
{pt3dadd(165180.000000,220860.000000,70675.000000,3.874829)}
{pt3dadd(165036.000000,220860.000000,70675.000000,3.874829)}
{pt3dadd(164916.000000,220884.000000,70650.000000,6.249659)}
{pt3dadd(164820.000000,220908.000000,70625.000000,3.874829)}
{pt3dadd(164712.000000,220896.000000,70700.000000,3.874829)}
{pt3dadd(164592.000000,220896.000000,70775.000000,3.874829)}
{pt3dadd(164448.000000,220968.000000,70800.000000,5.629098)}
{pt3dadd(164340.000000,221028.000000,70875.000000,3.254269)}
{pt3dadd(164220.000000,221088.000000,70950.000000,3.254269)}
{pt3dadd(164100.000000,221076.000000,71000.000000,3.254269)}
{pt3dadd(163992.000000,221052.000000,71025.000000,5.183294)}
{pt3dadd(163860.000000,221172.000000,71075.000000,3.429025)}
{pt3dadd(163728.000000,221160.000000,70925.000000,3.429025)}
{pt3dadd(163596.000000,221124.000000,70925.000000,3.429025)}
{pt3dadd(163452.000000,221196.000000,70875.000000,5.803854)}
{pt3dadd(163320.000000,221148.000000,70750.000000,3.874829)}
{pt3dadd(163044.000000,220752.000000,70750.000000,3.874829)}
{pt3dadd(162552.000000,220704.000000,70750.000000,3.874829)}
{pt3dadd(161988.000000,220536.000000,70750.000000,6.142666)}
{pt3dadd(161328.000000,220356.000000,70750.000000,3.767836)}
{pt3dadd(161208.000000,220212.000000,70625.000000,3.767836)}
{pt3dadd(161076.000000,220080.000000,70675.000000,3.767836)}
{pt3dadd(160956.000000,220284.000000,70700.000000,6.677632)}
{pt3dadd(160824.000000,220188.000000,70675.000000,4.409795)}
{pt3dadd(160704.000000,220092.000000,70650.000000,4.409795)}
{pt3dadd(160572.000000,219996.000000,70600.000000,4.409795)}
{pt3dadd(160452.000000,219912.000000,70575.000000,6.784625)}
{pt3dadd(160356.000000,219828.000000,70550.000000,3.874829)}
{pt3dadd(160224.000000,219744.000000,70525.000000,3.874829)}
{pt3dadd(160092.000000,219648.000000,70500.000000,3.874829)}
{pt3dadd(159948.000000,219516.000000,70500.000000,5.803854)}
{pt3dadd(159828.000000,219516.000000,70325.000000,3.429025)}
{pt3dadd(159696.000000,219324.000000,70425.000000,3.429025)}
{pt3dadd(159588.000000,219276.000000,70275.000000,3.429025)}
{pt3dadd(159300.000000,219132.000000,70275.000000,5.803854)}
{pt3dadd(158772.000000,219072.000000,70275.000000,3.874829)}
{pt3dadd(158412.000000,218892.000000,70275.000000,3.874829)}
{pt3dadd(158172.000000,218796.000000,70275.000000,3.874829)}
{pt3dadd(158016.000000,218736.000000,70125.000000,5.714693)}
{pt3dadd(157860.000000,218664.000000,69950.000000,3.339864)}
{pt3dadd(157704.000000,218508.000000,69750.000000,3.339864)}
{pt3dadd(157548.000000,218316.000000,69700.000000,3.339864)}
{pt3dadd(157380.000000,218124.000000,69650.000000,6.891618)}
{pt3dadd(157248.000000,218076.000000,69450.000000,5.051754)}
{pt3dadd(157128.000000,217944.000000,69250.000000,5.051754)}
{pt3dadd(156996.000000,217800.000000,69350.000000,5.051754)}
{pt3dadd(156864.000000,217824.000000,69325.000000,9.373860)}
{pt3dadd(156696.000000,217776.000000,69150.000000,5.822105)}
{pt3dadd(156576.000000,217776.000000,69150.000000,5.822105)}
{pt3dadd(156456.000000,217848.000000,69125.000000,5.822105)}
{pt3dadd(156276.000000,217872.000000,69000.000000,8.196935)}
{pt3dadd(156156.000000,217896.000000,68875.000000,3.874829)}
{pt3dadd(155976.000000,217884.000000,68650.000000,3.874829)}
{pt3dadd(155412.000000,218028.000000,68500.000000,3.874829)}
{pt3dadd(155256.000000,218148.000000,68550.000000,5.714693)}
{pt3dadd(155100.000000,218208.000000,68450.000000,3.339864)}
{pt3dadd(154956.000000,218280.000000,68400.000000,3.339864)}
{pt3dadd(154812.000000,218280.000000,68275.000000,3.339864)}
{pt3dadd(154680.000000,218388.000000,68300.000000,4.897384)}
{pt3dadd(154560.000000,218556.000000,68275.000000,3.057520)}
{pt3dadd(154452.000000,218724.000000,68325.000000,3.057520)}
{pt3dadd(154344.000000,218808.000000,68350.000000,3.057520)}
{pt3dadd(154248.000000,218844.000000,68325.000000,4.615041)}
{pt3dadd(154140.000000,218916.000000,68325.000000,3.057520)}
{pt3dadd(154020.000000,218892.000000,68400.000000,3.057520)}
{pt3dadd(153900.000000,219012.000000,68375.000000,3.057520)}
{pt3dadd(153768.000000,219120.000000,68325.000000,4.986545)}
{pt3dadd(153648.000000,219132.000000,68300.000000,3.429025)}
{pt3dadd(153528.000000,219144.000000,68275.000000,3.429025)}
{pt3dadd(153408.000000,219168.000000,68425.000000,3.429025)}
{pt3dadd(153276.000000,219204.000000,68375.000000,4.986545)}
{pt3dadd(153144.000000,219252.000000,68325.000000,3.057520)}
{pt3dadd(153036.000000,219372.000000,68300.000000,3.057520)}
{pt3dadd(152844.000000,219660.000000,68300.000000,3.057520)}
{pt3dadd(152604.000000,219936.000000,68300.000000,4.986545)}
{pt3dadd(152376.000000,220212.000000,68300.000000,3.429025)}
{pt3dadd(152292.000000,220368.000000,68475.000000,3.429025)}
{pt3dadd(152292.000000,220656.000000,68700.000000,3.429025)}
{pt3dadd(152316.000000,220776.000000,68750.000000,4.986545)}
{pt3dadd(152292.000000,220884.000000,68725.000000,3.057520)}
{pt3dadd(152160.000000,221016.000000,68925.000000,3.057520)}
{pt3dadd(152088.000000,221136.000000,68925.000000,3.057520)}
{pt3dadd(152088.000000,221508.000000,69150.000000,4.897384)}
{pt3dadd(151992.000000,221808.000000,69275.000000,3.339864)}
{pt3dadd(151812.000000,222204.000000,69450.000000,3.339864)}
{pt3dadd(151680.000000,222312.000000,69625.000000,3.339864)}
{pt3dadd(151500.000000,222540.000000,69800.000000,4.587797)}
{pt3dadd(151392.000000,222504.000000,69700.000000,2.747934)}
{pt3dadd(151332.000000,222780.000000,69850.000000,2.747934)}
{pt3dadd(151308.000000,222996.000000,69825.000000,2.747934)}
{pt3dadd(151188.000000,223020.000000,69875.000000,3.995868)}
{pt3dadd(151056.000000,223416.000000,69825.000000,3.522888)}
{pt3dadd(150924.000000,223932.000000,69900.000000,4.871480)}
{pt3dadd(150816.000000,224400.000000,70025.000000,5.374770)}

{create adhoc45}
{access adhoc45}
{connect adhoc45(1), adhoc3(0)}
{nseg = 1}
{strdef color color = "White"}
{pt3dclear()}
{pt3dadd(164196.000000,225216.000000,66525.000000,33.279160)}
{pt3dadd(164016.000000,224808.000000,66475.000000,24.904717)}
{pt3dadd(163836.000000,224688.000000,66425.000000,15.542830)}
{pt3dadd(163692.000000,224796.000000,66325.000000,15.542830)}
{pt3dadd(163524.000000,224460.000000,66425.000000,7.855832)}
{pt3dadd(163368.000000,224556.000000,66450.000000,7.855832)}
{pt3dadd(163224.000000,224592.000000,66500.000000,7.855832)}
{pt3dadd(163092.000000,224616.000000,66400.000000,15.223351)}
{pt3dadd(162936.000000,224544.000000,66450.000000,8.867519)}
{pt3dadd(162780.000000,224688.000000,66375.000000,8.867519)}
{pt3dadd(162624.000000,224748.000000,66400.000000,8.867519)}
{pt3dadd(162480.000000,224844.000000,66400.000000,15.223351)}
{pt3dadd(162324.000000,224904.000000,66400.000000,7.855832)}
{pt3dadd(162168.000000,224820.000000,66275.000000,7.855832)}
{pt3dadd(162012.000000,224736.000000,66225.000000,7.855832)}
{pt3dadd(161880.000000,224652.000000,66175.000000,13.945430)}
{pt3dadd(161760.000000,224568.000000,66125.000000,7.589598)}
{pt3dadd(161592.000000,224712.000000,66150.000000,7.589598)}
{pt3dadd(161448.000000,224856.000000,66150.000000,7.589598)}
{pt3dadd(161340.000000,224784.000000,66100.000000,13.945430)}
{pt3dadd(161148.000000,224784.000000,66025.000000,7.855832)}
{pt3dadd(160968.000000,224928.000000,65875.000000,7.855832)}
{pt3dadd(160800.000000,225072.000000,65875.000000,7.855832)}
{pt3dadd(160668.000000,225072.000000,65825.000000,14.211664)}
{pt3dadd(160536.000000,225096.000000,65775.000000,7.855832)}
{pt3dadd(160392.000000,225120.000000,65725.000000,7.855832)}
{pt3dadd(160248.000000,225144.000000,65675.000000,7.855832)}
{pt3dadd(160104.000000,225144.000000,65425.000000,14.211664)}
{pt3dadd(159948.000000,225144.000000,65550.000000,7.855832)}
{pt3dadd(159792.000000,225096.000000,65450.000000,7.855832)}
{pt3dadd(159660.000000,225048.000000,65350.000000,7.855832)}
{pt3dadd(159528.000000,225012.000000,65425.000000,15.542830)}
{pt3dadd(159384.000000,225036.000000,65375.000000,9.186998)}
{pt3dadd(159228.000000,225024.000000,65325.000000,9.186998)}
{pt3dadd(159084.000000,224988.000000,65300.000000,9.186998)}
{pt3dadd(158940.000000,224952.000000,65250.000000,15.670727)}
{pt3dadd(158820.000000,224952.000000,65025.000000,7.983729)}
{pt3dadd(158664.000000,224952.000000,64800.000000,7.983729)}
{pt3dadd(158520.000000,224976.000000,64875.000000,7.983729)}
{pt3dadd(158400.000000,224964.000000,64825.000000,14.073327)}
{pt3dadd(158280.000000,224748.000000,64750.000000,7.589598)}
{pt3dadd(158148.000000,224604.000000,64650.000000,7.589598)}
{pt3dadd(158004.000000,224664.000000,64700.000000,7.589598)}
{pt3dadd(157896.000000,224664.000000,64700.000000,13.945430)}
{pt3dadd(157788.000000,224592.000000,64600.000000,7.855832)}
{pt3dadd(157644.000000,224664.000000,64500.000000,7.855832)}
{pt3dadd(157500.000000,224688.000000,64350.000000,7.855832)}
{pt3dadd(157356.000000,224712.000000,64400.000000,13.102358)}
{pt3dadd(157236.000000,224496.000000,64425.000000,6.746526)}
{pt3dadd(157128.000000,224496.000000,64400.000000,6.746526)}
{pt3dadd(156960.000000,224448.000000,64250.000000,6.746526)}
{pt3dadd(156840.000000,224304.000000,64300.000000,13.102358)}
{pt3dadd(156660.000000,224508.000000,64275.000000,7.855832)}
{pt3dadd(156492.000000,224160.000000,64175.000000,7.855832)}
{pt3dadd(156264.000000,224040.000000,64025.000000,7.855832)}
{pt3dadd(156168.000000,223812.000000,64100.000000,14.211664)}
{pt3dadd(156024.000000,223776.000000,63925.000000,7.855832)}
{pt3dadd(155916.000000,223812.000000,63850.000000,7.855832)}
{pt3dadd(155832.000000,223656.000000,63850.000000,7.855832)}
{pt3dadd(155724.000000,223788.000000,63825.000000,14.211664)}
{pt3dadd(155580.000000,223716.000000,63825.000000,7.855832)}
{pt3dadd(155472.000000,223500.000000,63825.000000,7.855832)}
{pt3dadd(155328.000000,223416.000000,63675.000000,7.855832)}
{pt3dadd(155184.000000,223368.000000,63675.000000,13.945430)}
{pt3dadd(155040.000000,223392.000000,63700.000000,13.945430)}
{pt3dadd(154908.000000,223272.000000,63625.000000,20.301262)}
{pt3dadd(154752.000000,223272.000000,63550.000000,32.835437)}
{pt3dadd(154608.000000,223200.000000,63525.000000,33.279160)}

{create adhoc46}
{access adhoc46}
{connect adhoc46(1), adhoc45(0)}
{nseg = 1}
{strdef color color = "White"}
{pt3dclear()}
{pt3dadd(154608.000000,223200.000000,63525.000000,33.279160)}
{pt3dadd(154500.000000,224760.000000,64600.000000,16.942712)}
{pt3dadd(154368.000000,224856.000000,64375.000000,10.765627)}
{pt3dadd(154212.000000,225072.000000,64600.000000,6.784625)}
{pt3dadd(154068.000000,225288.000000,64675.000000,3.874829)}
{pt3dadd(153936.000000,225432.000000,64700.000000,3.874829)}
{pt3dadd(153804.000000,225636.000000,64700.000000,3.874829)}
{pt3dadd(153684.000000,225912.000000,64825.000000,8.012051)}
{pt3dadd(153564.000000,226140.000000,64975.000000,5.637222)}
{pt3dadd(153456.000000,226116.000000,64775.000000,9.188976)}
{pt3dadd(153324.000000,226296.000000,64975.000000,11.118001)}
{pt3dadd(153228.000000,226260.000000,65000.000000,10.634632)}
{pt3dadd(153168.000000,226536.000000,65050.000000,11.145123)}

{create adhoc47}
{access adhoc47}
{connect adhoc47(1), adhoc46(0)}
{nseg = 1}
{strdef color color = "White"}
{pt3dclear()}
{pt3dadd(153168.000000,226536.000000,65050.000000,11.145123)}
{pt3dadd(153156.000000,227376.000000,65025.000000,7.310908)}
{pt3dadd(153048.000000,227652.000000,65075.000000,4.986545)}
{pt3dadd(152952.000000,227736.000000,65175.000000,4.540740)}
{pt3dadd(153024.000000,227928.000000,65175.000000,2.983220)}
{pt3dadd(152940.000000,228264.000000,65175.000000,3.429716)}
{pt3dadd(152844.000000,228708.000000,65175.000000,3.876212)}
{pt3dadd(152688.000000,229092.000000,65175.000000,2.988320)}
{pt3dadd(152376.000000,229596.000000,65175.000000,3.732480)}

{create adhoc48}
{access adhoc48}
{connect adhoc48(1), adhoc46(0)}
{nseg = 1}
{strdef color color = "White"}
{pt3dclear()}
{pt3dadd(153168.000000,226536.000000,65050.000000,11.145123)}
{pt3dadd(153036.000000,226296.000000,64925.000000,9.350714)}
{pt3dadd(152880.000000,226224.000000,65025.000000,6.210428)}
{pt3dadd(152712.000000,226272.000000,65050.000000,7.191199)}
{pt3dadd(152544.000000,226152.000000,65075.000000,4.409795)}
{pt3dadd(152436.000000,226056.000000,65100.000000,4.409795)}
{pt3dadd(152268.000000,226128.000000,65100.000000,4.409795)}
{pt3dadd(152136.000000,226164.000000,65075.000000,6.338820)}
{pt3dadd(152004.000000,226152.000000,64950.000000,3.429025)}
{pt3dadd(151860.000000,226128.000000,64825.000000,3.429025)}
{pt3dadd(151728.000000,226056.000000,64775.000000,3.429025)}
{pt3dadd(151536.000000,226008.000000,64875.000000,5.268888)}
{pt3dadd(151428.000000,225960.000000,64925.000000,3.339864)}
{pt3dadd(151284.000000,226116.000000,64850.000000,3.339864)}
{pt3dadd(151152.000000,226212.000000,64900.000000,3.339864)}
{pt3dadd(151056.000000,226308.000000,64950.000000,5.011962)}
{pt3dadd(150912.000000,226392.000000,65025.000000,3.172098)}
{pt3dadd(150780.000000,226380.000000,64975.000000,3.172098)}
{pt3dadd(150660.000000,226356.000000,64925.000000,3.172098)}
{pt3dadd(150516.000000,226284.000000,64825.000000,4.655318)}
{pt3dadd(150384.000000,226356.000000,64700.000000,2.983220)}
{pt3dadd(150276.000000,226428.000000,64625.000000,2.983220)}
{pt3dadd(150168.000000,226332.000000,64525.000000,2.983220)}
{pt3dadd(150084.000000,226044.000000,63925.000000,5.300399)}
{pt3dadd(149940.000000,226008.000000,63525.000000,3.817179)}
{pt3dadd(149904.000000,226032.000000,63250.000000,3.817179)}
{pt3dadd(149772.000000,226080.000000,63075.000000,3.817179)}
{pt3dadd(149556.000000,226248.000000,62900.000000,5.374700)}
{pt3dadd(149376.000000,226440.000000,62675.000000,3.057520)}
{pt3dadd(149400.000000,226452.000000,62475.000000,3.057520)}
{pt3dadd(149436.000000,226368.000000,62275.000000,3.057520)}
{pt3dadd(149436.000000,226380.000000,62075.000000,4.986545)}
{pt3dadd(149436.000000,226332.000000,61700.000000,3.429025)}
{pt3dadd(149436.000000,226332.000000,61325.000000,3.429025)}
{pt3dadd(149520.000000,226332.000000,61025.000000,3.429025)}
{pt3dadd(149604.000000,226332.000000,60600.000000,5.803854)}
{pt3dadd(149700.000000,226332.000000,60175.000000,3.874829)}
{pt3dadd(149868.000000,226332.000000,59650.000000,3.874829)}
{pt3dadd(149964.000000,226560.000000,59425.000000,3.874829)}
{pt3dadd(149952.000000,226656.000000,59175.000000,5.803854)}
{pt3dadd(150120.000000,226572.000000,59000.000000,3.429025)}
{pt3dadd(150300.000000,226524.000000,58750.000000,3.429025)}
{pt3dadd(150480.000000,226368.000000,58525.000000,3.429025)}
{pt3dadd(150612.000000,226380.000000,58400.000000,5.358049)}
{pt3dadd(150756.000000,226296.000000,58350.000000,3.429025)}
{pt3dadd(150888.000000,226080.000000,58025.000000,3.429025)}
{pt3dadd(151104.000000,226032.000000,58000.000000,5.696861)}
{pt3dadd(151272.000000,225924.000000,57950.000000,6.944795)}
{pt3dadd(151416.000000,225612.000000,57825.000000,7.359617)}
{pt3dadd(151560.000000,225516.000000,57800.000000,7.739669)}

{create adhoc49}
{access adhoc49}
{connect adhoc49(1), adhoc45(0)}
{nseg = 1}
{strdef color color = "White"}
{pt3dclear()}
{pt3dadd(154608.000000,223200.000000,63525.000000,33.279160)}
{pt3dadd(154440.000000,222768.000000,63075.000000,24.904717)}
{pt3dadd(154260.000000,222468.000000,62975.000000,15.542830)}
{pt3dadd(153972.000000,221856.000000,62675.000000,16.554517)}
{pt3dadd(153816.000000,221412.000000,62400.000000,8.867519)}
{pt3dadd(153624.000000,221208.000000,62325.000000,8.867519)}
{pt3dadd(153528.000000,221040.000000,62150.000000,8.867519)}
{pt3dadd(153624.000000,220848.000000,61950.000000,16.554517)}
{pt3dadd(153504.000000,220692.000000,62025.000000,9.186998)}
{pt3dadd(153348.000000,220524.000000,61925.000000,9.186998)}
{pt3dadd(153228.000000,220356.000000,61775.000000,9.186998)}
{pt3dadd(153204.000000,220200.000000,61700.000000,14.433524)}
{pt3dadd(153180.000000,220056.000000,61625.000000,6.746526)}
{pt3dadd(153192.000000,219912.000000,61450.000000,6.746526)}
{pt3dadd(153168.000000,219744.000000,61350.000000,6.746526)}
{pt3dadd(153144.000000,219588.000000,61250.000000,14.114045)}
{pt3dadd(153120.000000,219432.000000,61150.000000,8.867519)}
{pt3dadd(153096.000000,219300.000000,61050.000000,8.867519)}
{pt3dadd(152928.000000,219156.000000,61100.000000,8.867519)}
{pt3dadd(152916.000000,219024.000000,61025.000000,15.223351)}
{pt3dadd(152904.000000,218904.000000,60950.000000,11.481601)}
{pt3dadd(152748.000000,218748.000000,60600.000000,15.033356)}
{pt3dadd(152568.000000,218628.000000,60250.000000,24.055593)}
{pt3dadd(152604.000000,218484.000000,60075.000000,19.258772)}

{create adhoc50}
{access adhoc50}
{connect adhoc50(1), adhoc49(0)}
{nseg = 1}
{strdef color color = "White"}
{pt3dclear()}
{pt3dadd(152604.000000,218484.000000,60075.000000,19.258772)}
{pt3dadd(152220.000000,218424.000000,59175.000000,11.377640)}
{pt3dadd(152124.000000,218364.000000,58950.000000,7.426584)}
{pt3dadd(151968.000000,218316.000000,58725.000000,6.656233)}
{pt3dadd(151956.000000,218100.000000,58475.000000,4.281404)}
{pt3dadd(151944.000000,217836.000000,58250.000000,4.281404)}
{pt3dadd(151920.000000,217740.000000,58025.000000,4.281404)}
{pt3dadd(151956.000000,217632.000000,57825.000000,7.833158)}
{pt3dadd(151944.000000,217632.000000,57575.000000,5.051754)}
{pt3dadd(151956.000000,217392.000000,57375.000000,5.051754)}
{pt3dadd(151776.000000,217260.000000,57175.000000,5.051754)}
{pt3dadd(151728.000000,216804.000000,56950.000000,7.961550)}
{pt3dadd(151740.000000,216504.000000,56775.000000,4.409795)}
{pt3dadd(151752.000000,216312.000000,56625.000000,4.409795)}
{pt3dadd(151848.000000,216312.000000,56475.000000,4.409795)}
{pt3dadd(151848.000000,215676.000000,56300.000000,7.319591)}
{pt3dadd(151860.000000,215340.000000,56075.000000,4.409795)}
{pt3dadd(151836.000000,214776.000000,55875.000000,4.409795)}
{pt3dadd(151980.000000,214632.000000,55675.000000,4.409795)}
{pt3dadd(152088.000000,214488.000000,55550.000000,7.319591)}
{pt3dadd(152100.000000,214356.000000,55625.000000,4.409795)}
{pt3dadd(151944.000000,214212.000000,55500.000000,4.409795)}
{pt3dadd(152112.000000,214080.000000,55475.000000,4.409795)}
{pt3dadd(152148.000000,213948.000000,55275.000000,6.784625)}
{pt3dadd(152268.000000,213816.000000,55100.000000,3.874829)}
{pt3dadd(152256.000000,213672.000000,55000.000000,3.874829)}
{pt3dadd(152412.000000,213516.000000,54825.000000,3.874829)}
{pt3dadd(152472.000000,213300.000000,54625.000000,7.124606)}
{pt3dadd(152484.000000,213228.000000,54425.000000,4.749777)}
{pt3dadd(152580.000000,212952.000000,54250.000000,4.749777)}
{pt3dadd(152568.000000,213096.000000,54025.000000,4.749777)}
{pt3dadd(152736.000000,212760.000000,53800.000000,6.678801)}
{pt3dadd(152796.000000,212568.000000,53625.000000,3.429025)}
{pt3dadd(153000.000000,212292.000000,53425.000000,3.429025)}
{pt3dadd(153036.000000,212004.000000,53225.000000,3.429025)}
{pt3dadd(152988.000000,211896.000000,53025.000000,6.338820)}
{pt3dadd(153096.000000,211572.000000,52800.000000,4.409795)}
{pt3dadd(152988.000000,211548.000000,52575.000000,4.409795)}
{pt3dadd(153048.000000,211368.000000,52350.000000,4.409795)}
{pt3dadd(153324.000000,211092.000000,52175.000000,6.784625)}
{pt3dadd(153540.000000,210324.000000,51950.000000,3.874829)}
{pt3dadd(153756.000000,209976.000000,51725.000000,3.874829)}
{pt3dadd(153876.000000,209412.000000,51600.000000,3.874829)}
{pt3dadd(154044.000000,209088.000000,51600.000000,5.714693)}
{pt3dadd(154296.000000,208692.000000,51600.000000,3.339864)}
{pt3dadd(154512.000000,208236.000000,51600.000000,3.339864)}
{pt3dadd(154680.000000,207780.000000,51600.000000,3.339864)}
{pt3dadd(154896.000000,207648.000000,51600.000000,5.714693)}
{pt3dadd(155100.000000,207456.000000,51500.000000,3.874829)}
{pt3dadd(155076.000000,207288.000000,51500.000000,3.874829)}
{pt3dadd(155064.000000,207084.000000,51500.000000,3.874829)}
{pt3dadd(155172.000000,206904.000000,51450.000000,4.434793)}
{pt3dadd(155484.000000,206748.000000,51575.000000,2.506459)}
{pt3dadd(155832.000000,206472.000000,51475.000000,2.952955)}
{pt3dadd(155928.000000,206292.000000,51550.000000,3.921592)}
{pt3dadd(156144.000000,206160.000000,51350.000000,3.732480)}

{create adhoc51}
{access adhoc51}
{connect adhoc51(1), adhoc49(0)}
{nseg = 1}
{strdef color color = "White"}
{pt3dclear()}
{pt3dadd(152604.000000,218484.000000,60075.000000,19.258772)}
{pt3dadd(152916.000000,218220.000000,60625.000000,18.012644)}
{pt3dadd(152772.000000,218088.000000,60675.000000,11.407586)}
{pt3dadd(152832.000000,217860.000000,60525.000000,14.916650)}
{pt3dadd(152940.000000,217644.000000,60500.000000,8.560818)}
{pt3dadd(152976.000000,217476.000000,60450.000000,8.560818)}
{pt3dadd(152988.000000,217296.000000,60325.000000,8.560818)}
{pt3dadd(153000.000000,217128.000000,60225.000000,14.916650)}
{pt3dadd(152964.000000,216924.000000,60200.000000,7.855832)}
{pt3dadd(153000.000000,216732.000000,60150.000000,7.855832)}
{pt3dadd(153072.000000,216576.000000,60175.000000,7.855832)}
{pt3dadd(153120.000000,216396.000000,60050.000000,14.916650)}
{pt3dadd(153168.000000,216228.000000,59950.000000,8.560818)}
{pt3dadd(153144.000000,216048.000000,59925.000000,8.560818)}
{pt3dadd(153120.000000,215844.000000,59900.000000,8.560818)}
{pt3dadd(153192.000000,215664.000000,59825.000000,14.916650)}
{pt3dadd(153264.000000,215508.000000,59750.000000,7.855832)}
{pt3dadd(153324.000000,215316.000000,59675.000000,7.855832)}
{pt3dadd(153312.000000,215160.000000,59625.000000,7.855832)}
{pt3dadd(153312.000000,214980.000000,59575.000000,14.211664)}
{pt3dadd(153384.000000,214836.000000,59575.000000,7.855832)}
{pt3dadd(153576.000000,214692.000000,59500.000000,7.855832)}
{pt3dadd(153588.000000,214536.000000,59375.000000,7.855832)}
{pt3dadd(153564.000000,214356.000000,59275.000000,13.945430)}
{pt3dadd(153528.000000,214176.000000,59325.000000,7.589598)}
{pt3dadd(153444.000000,214008.000000,59300.000000,7.589598)}
{pt3dadd(153360.000000,213852.000000,59275.000000,7.589598)}
{pt3dadd(153444.000000,213708.000000,59250.000000,13.945430)}
{pt3dadd(153408.000000,213576.000000,59175.000000,7.855832)}
{pt3dadd(153456.000000,213420.000000,59225.000000,7.855832)}
{pt3dadd(153492.000000,213264.000000,59200.000000,7.855832)}
{pt3dadd(153552.000000,213108.000000,59050.000000,14.211664)}
{pt3dadd(153552.000000,212964.000000,58925.000000,7.855832)}
{pt3dadd(153552.000000,212784.000000,58950.000000,7.855832)}
{pt3dadd(153636.000000,212628.000000,58850.000000,7.855832)}
{pt3dadd(153708.000000,212496.000000,58825.000000,14.211664)}
{pt3dadd(153720.000000,212340.000000,58825.000000,7.855832)}
{pt3dadd(153708.000000,212208.000000,58750.000000,7.855832)}
{pt3dadd(153672.000000,212076.000000,58750.000000,7.855832)}
{pt3dadd(153636.000000,211932.000000,58750.000000,13.945430)}
{pt3dadd(153600.000000,211800.000000,58750.000000,7.589598)}
{pt3dadd(153564.000000,211692.000000,58750.000000,7.589598)}
{pt3dadd(153624.000000,211572.000000,58775.000000,7.589598)}
{pt3dadd(153684.000000,211404.000000,58800.000000,14.355982)}
{pt3dadd(153744.000000,211260.000000,58825.000000,8.266384)}
{pt3dadd(153684.000000,211092.000000,58775.000000,8.266384)}
{pt3dadd(153624.000000,210948.000000,58725.000000,8.266384)}
{pt3dadd(153648.000000,210816.000000,58675.000000,14.355982)}
{pt3dadd(153672.000000,210684.000000,58625.000000,7.589598)}
{pt3dadd(153684.000000,210516.000000,58725.000000,7.589598)}
{pt3dadd(153648.000000,210360.000000,58650.000000,7.589598)}
{pt3dadd(153732.000000,210204.000000,58725.000000,14.957117)}
{pt3dadd(153708.000000,210036.000000,58700.000000,8.867519)}
{pt3dadd(153828.000000,209892.000000,58600.000000,8.867519)}
{pt3dadd(153816.000000,209724.000000,58575.000000,8.867519)}
{pt3dadd(153900.000000,209568.000000,58600.000000,16.554517)}
{pt3dadd(153912.000000,209436.000000,58625.000000,9.186998)}
{pt3dadd(153948.000000,209268.000000,58600.000000,9.186998)}
{pt3dadd(153984.000000,209124.000000,58575.000000,9.186998)}
{pt3dadd(154020.000000,208956.000000,58450.000000,16.873996)}
{pt3dadd(154032.000000,208800.000000,58450.000000,9.186998)}
{pt3dadd(154164.000000,208656.000000,58525.000000,9.186998)}
{pt3dadd(154236.000000,208524.000000,58400.000000,9.186998)}
{pt3dadd(154272.000000,208368.000000,58375.000000,15.542830)}
{pt3dadd(154308.000000,208212.000000,58350.000000,7.855832)}
{pt3dadd(154344.000000,208032.000000,58325.000000,7.855832)}
{pt3dadd(154380.000000,207876.000000,58300.000000,7.855832)}
{pt3dadd(154416.000000,207684.000000,58275.000000,14.211664)}
{pt3dadd(154452.000000,207516.000000,58150.000000,7.855832)}
{pt3dadd(154488.000000,207360.000000,58025.000000,7.855832)}
{pt3dadd(154524.000000,207228.000000,57925.000000,7.855832)}
{pt3dadd(154560.000000,207036.000000,57825.000000,14.211664)}
{pt3dadd(154608.000000,206868.000000,57750.000000,7.855832)}
{pt3dadd(154668.000000,206688.000000,57700.000000,7.855832)}
{pt3dadd(154728.000000,206544.000000,57750.000000,7.855832)}
{pt3dadd(154812.000000,206376.000000,57675.000000,14.211664)}
{pt3dadd(154836.000000,206232.000000,57625.000000,7.855832)}
{pt3dadd(154860.000000,206088.000000,57600.000000,7.855832)}
{pt3dadd(154884.000000,205968.000000,57575.000000,7.855832)}
{pt3dadd(155016.000000,205800.000000,57725.000000,14.211664)}
{pt3dadd(155040.000000,205692.000000,57700.000000,7.855832)}
{pt3dadd(155064.000000,205560.000000,57675.000000,7.855832)}
{pt3dadd(155100.000000,205440.000000,57725.000000,7.855832)}
{pt3dadd(155208.000000,205320.000000,57775.000000,14.211664)}
{pt3dadd(155400.000000,205212.000000,57750.000000,7.855832)}
{pt3dadd(155400.000000,205092.000000,57600.000000,7.855832)}
{pt3dadd(155520.000000,204984.000000,57700.000000,7.855832)}
{pt3dadd(155472.000000,204840.000000,57600.000000,14.211664)}
{pt3dadd(155424.000000,204672.000000,57500.000000,7.855832)}
{pt3dadd(155508.000000,204516.000000,57550.000000,7.855832)}
{pt3dadd(155448.000000,204348.000000,57725.000000,7.855832)}
{pt3dadd(155352.000000,204192.000000,57750.000000,15.542830)}
{pt3dadd(155304.000000,204060.000000,57725.000000,9.186998)}
{pt3dadd(155448.000000,203904.000000,57675.000000,16.554516)}
{pt3dadd(155592.000000,203760.000000,57625.000000,20.876621)}
{pt3dadd(155700.000000,203616.000000,57600.000000,20.982706)}
{pt3dadd(155604.000000,203448.000000,57725.000000,23.110527)}

{create adhoc52}
{access adhoc52}
{connect adhoc52(1), adhoc51(0)}
{nseg = 1}
{strdef color color = "White"}
{pt3dclear()}
{pt3dadd(155604.000000,203448.000000,57725.000000,23.110527)}
{pt3dadd(156012.000000,203268.000000,57250.000000,17.447720)}
{pt3dadd(156156.000000,203052.000000,57075.000000,11.068632)}
{pt3dadd(156144.000000,202848.000000,56900.000000,11.993053)}
{pt3dadd(156300.000000,202656.000000,56525.000000,6.746526)}
{pt3dadd(156360.000000,202464.000000,56475.000000,6.746526)}
{pt3dadd(156288.000000,202284.000000,56375.000000,6.746526)}
{pt3dadd(156252.000000,202128.000000,56500.000000,11.558205)}
{pt3dadd(156372.000000,201948.000000,56450.000000,6.311679)}
{pt3dadd(156444.000000,201792.000000,56325.000000,6.311679)}
{pt3dadd(156444.000000,201612.000000,56275.000000,6.311679)}
{pt3dadd(156480.000000,201444.000000,56175.000000,11.336344)}
{pt3dadd(156612.000000,201264.000000,55975.000000,6.524665)}
{pt3dadd(156672.000000,201096.000000,56025.000000,6.524665)}
{pt3dadd(156672.000000,200928.000000,55775.000000,6.524665)}
{pt3dadd(156768.000000,200724.000000,55800.000000,11.549331)}
{pt3dadd(156852.000000,200544.000000,55625.000000,6.524665)}
{pt3dadd(156852.000000,200376.000000,55475.000000,6.524665)}
{pt3dadd(156972.000000,200208.000000,55225.000000,6.524665)}
{pt3dadd(156900.000000,200028.000000,55225.000000,10.846771)}
{pt3dadd(156948.000000,199848.000000,55125.000000,5.822105)}
{pt3dadd(156912.000000,199692.000000,54950.000000,5.822105)}
{pt3dadd(156864.000000,199500.000000,54900.000000,5.822105)}
{pt3dadd(156828.000000,199320.000000,54775.000000,8.731901)}
{pt3dadd(156828.000000,199188.000000,54600.000000,4.409795)}
{pt3dadd(156684.000000,199008.000000,54250.000000,4.409795)}
{pt3dadd(156444.000000,198708.000000,54025.000000,4.409795)}
{pt3dadd(156468.000000,198564.000000,53775.000000,7.807480)}
{pt3dadd(156252.000000,198504.000000,53525.000000,4.897684)}
{pt3dadd(156036.000000,198444.000000,53325.000000,4.897684)}
{pt3dadd(156024.000000,198312.000000,53150.000000,4.897684)}
{pt3dadd(156012.000000,198180.000000,52975.000000,8.449439)}
{pt3dadd(155916.000000,198036.000000,52700.000000,5.051754)}
{pt3dadd(155820.000000,197892.000000,52475.000000,5.051754)}
{pt3dadd(155676.000000,197784.000000,52275.000000,5.051754)}
{pt3dadd(155604.000000,197760.000000,52100.000000,8.449439)}
{pt3dadd(155532.000000,197760.000000,51900.000000,4.897684)}
{pt3dadd(155484.000000,197712.000000,51725.000000,4.897684)}
{pt3dadd(155436.000000,197628.000000,51500.000000,4.897684)}
{pt3dadd(155448.000000,197400.000000,51325.000000,8.449439)}
{pt3dadd(155568.000000,197328.000000,51075.000000,5.051754)}
{pt3dadd(155700.000000,197220.000000,50900.000000,5.051754)}
{pt3dadd(155772.000000,196968.000000,50725.000000,8.603509)}
{pt3dadd(155856.000000,196824.000000,50525.000000,12.155263)}
{pt3dadd(155880.000000,196704.000000,50225.000000,13.339181)}
{pt3dadd(155808.000000,196524.000000,50225.000000,19.258772)}

{create adhoc53}
{access adhoc53}
{connect adhoc53(1), adhoc52(0)}
{nseg = 1}
{strdef color color = "White"}
{pt3dclear()}
{pt3dadd(155808.000000,196524.000000,50225.000000,19.258772)}
{pt3dadd(156036.000000,196404.000000,50500.000000,13.339181)}
{pt3dadd(156204.000000,196212.000000,50525.000000,8.603509)}
{pt3dadd(156336.000000,196044.000000,50575.000000,7.426584)}
{pt3dadd(156432.000000,195864.000000,50525.000000,3.874829)}
{pt3dadd(156492.000000,195696.000000,50475.000000,3.874829)}
{pt3dadd(156336.000000,195552.000000,50525.000000,3.874829)}
{pt3dadd(156216.000000,195252.000000,50525.000000,6.656233)}
{pt3dadd(156180.000000,194808.000000,50525.000000,4.281404)}
{pt3dadd(155988.000000,194340.000000,50525.000000,4.281404)}
{pt3dadd(155892.000000,193776.000000,50525.000000,4.281404)}
{pt3dadd(155952.000000,193248.000000,50525.000000,7.833158)}
{pt3dadd(155976.000000,193092.000000,50625.000000,5.051754)}
{pt3dadd(155976.000000,192936.000000,50625.000000,5.051754)}
{pt3dadd(155976.000000,192780.000000,50625.000000,5.051754)}
{pt3dadd(156036.000000,192612.000000,50700.000000,9.188976)}
{pt3dadd(156012.000000,192468.000000,50625.000000,5.637221)}
{pt3dadd(156012.000000,192348.000000,50525.000000,5.637221)}
{pt3dadd(156036.000000,192216.000000,50400.000000,5.637221)}
{pt3dadd(156048.000000,192096.000000,50475.000000,8.547017)}
{pt3dadd(155856.000000,191988.000000,50425.000000,4.409795)}
{pt3dadd(155856.000000,191892.000000,50450.000000,4.409795)}
{pt3dadd(155856.000000,191772.000000,50475.000000,4.409795)}
{pt3dadd(155856.000000,191688.000000,50500.000000,6.677632)}
{pt3dadd(155856.000000,191580.000000,50525.000000,3.767836)}
{pt3dadd(155844.000000,191436.000000,50500.000000,3.767836)}
{pt3dadd(155904.000000,191304.000000,50450.000000,3.767836)}
{pt3dadd(155784.000000,191148.000000,50500.000000,6.142666)}
{pt3dadd(155724.000000,191004.000000,50400.000000,3.874829)}
{pt3dadd(155652.000000,190872.000000,50425.000000,3.874829)}
{pt3dadd(155580.000000,190752.000000,50375.000000,3.874829)}
{pt3dadd(155664.000000,190644.000000,50350.000000,6.532977)}
{pt3dadd(155772.000000,190560.000000,50425.000000,4.158148)}
{pt3dadd(155460.000000,190392.000000,50325.000000,4.158148)}
{pt3dadd(155448.000000,190248.000000,50200.000000,4.158148)}
{pt3dadd(155508.000000,190116.000000,50175.000000,7.067943)}
{pt3dadd(155532.000000,189972.000000,50200.000000,4.409795)}
{pt3dadd(155556.000000,189840.000000,50100.000000,5.399740)}
{pt3dadd(155280.000000,189984.000000,49850.000000,5.925305)}
{pt3dadd(155340.000000,189924.000000,49625.000000,4.025849)}
{pt3dadd(155364.000000,189888.000000,49375.000000,4.127823)}

{create adhoc54}
{access adhoc54}
{connect adhoc54(1), adhoc52(0)}
{nseg = 1}
{strdef color color = "White"}
{pt3dclear()}
{pt3dadd(155808.000000,196524.000000,50225.000000,19.258772)}
{pt3dadd(155544.000000,196416.000000,49850.000000,11.377640)}
{pt3dadd(155472.000000,196248.000000,49575.000000,7.426584)}
{pt3dadd(155304.000000,196140.000000,49325.000000,5.803854)}
{pt3dadd(155280.000000,196020.000000,49250.000000,3.429025)}
{pt3dadd(155340.000000,195876.000000,49200.000000,3.429025)}
{pt3dadd(155280.000000,195744.000000,48850.000000,3.429025)}
{pt3dadd(155340.000000,195624.000000,48725.000000,5.358049)}
{pt3dadd(155292.000000,195504.000000,48625.000000,3.429025)}
{pt3dadd(155352.000000,195360.000000,48450.000000,3.429025)}
{pt3dadd(155508.000000,195108.000000,48250.000000,3.429025)}
{pt3dadd(155568.000000,195096.000000,48025.000000,5.803854)}
{pt3dadd(155556.000000,195024.000000,47775.000000,3.874829)}
{pt3dadd(155484.000000,194916.000000,47525.000000,3.874829)}
{pt3dadd(155376.000000,194952.000000,47325.000000,3.874829)}
{pt3dadd(155436.000000,194892.000000,47150.000000,5.803854)}
{pt3dadd(155496.000000,194844.000000,46950.000000,3.429025)}
{pt3dadd(155700.000000,194832.000000,46750.000000,3.429025)}
{pt3dadd(155688.000000,194664.000000,46575.000000,3.429025)}
{pt3dadd(155784.000000,194496.000000,46375.000000,5.358049)}
{pt3dadd(155904.000000,194520.000000,46175.000000,3.429025)}
{pt3dadd(155964.000000,194328.000000,45975.000000,3.429025)}
{pt3dadd(156060.000000,194244.000000,45775.000000,3.429025)}
{pt3dadd(156096.000000,194052.000000,45600.000000,6.980779)}
{pt3dadd(156192.000000,193944.000000,45375.000000,5.051754)}
{pt3dadd(156252.000000,193836.000000,45175.000000,5.051754)}
{pt3dadd(156396.000000,193776.000000,44925.000000,5.051754)}
{pt3dadd(156468.000000,193608.000000,44725.000000,7.833158)}
{pt3dadd(156576.000000,193428.000000,44525.000000,4.281404)}
{pt3dadd(156672.000000,193272.000000,44325.000000,4.281404)}
{pt3dadd(156768.000000,192984.000000,44100.000000,4.281404)}
{pt3dadd(156840.000000,192576.000000,43900.000000,6.210428)}
{pt3dadd(156984.000000,192336.000000,43700.000000,3.429025)}
{pt3dadd(157116.000000,191892.000000,43675.000000,3.429025)}
{pt3dadd(157236.000000,191520.000000,43550.000000,3.429025)}
{pt3dadd(157368.000000,191292.000000,43475.000000,4.418969)}
{pt3dadd(157512.000000,191196.000000,43500.000000,2.489945)}
{pt3dadd(157668.000000,191004.000000,43525.000000,2.489945)}
{pt3dadd(157728.000000,190860.000000,43500.000000,2.489945)}
{pt3dadd(157776.000000,190728.000000,43400.000000,3.737879)}
{pt3dadd(157632.000000,190608.000000,43375.000000,2.747934)}
{pt3dadd(157788.000000,190476.000000,43375.000000,2.747934)}
{pt3dadd(157764.000000,190320.000000,43300.000000,2.747934)}
{pt3dadd(157824.000000,190164.000000,43275.000000,3.995868)}
{pt3dadd(157884.000000,190020.000000,43200.000000,2.747934)}
{pt3dadd(157932.000000,189888.000000,43150.000000,2.747934)}
{pt3dadd(157896.000000,189744.000000,43150.000000,2.747934)}
{pt3dadd(157860.000000,189612.000000,43150.000000,4.676958)}
{pt3dadd(157872.000000,189468.000000,43175.000000,3.429025)}
{pt3dadd(157896.000000,189348.000000,43200.000000,3.429025)}
{pt3dadd(158052.000000,189204.000000,43100.000000,3.429025)}
{pt3dadd(157872.000000,189036.000000,42900.000000,4.986545)}
{pt3dadd(157956.000000,188832.000000,42800.000000,3.057520)}
{pt3dadd(157956.000000,188712.000000,42750.000000,3.057520)}
{pt3dadd(157800.000000,188520.000000,43100.000000,3.057520)}
{pt3dadd(157920.000000,187896.000000,43225.000000,4.986545)}
{pt3dadd(157920.000000,187224.000000,43450.000000,3.429025)}
{pt3dadd(158028.000000,186912.000000,43625.000000,3.429025)}
{pt3dadd(158268.000000,186468.000000,43800.000000,3.429025)}
{pt3dadd(158412.000000,185412.000000,43975.000000,4.986545)}
{pt3dadd(158460.000000,184920.000000,44150.000000,3.057520)}
{pt3dadd(158292.000000,184380.000000,44375.000000,4.540740)}
{pt3dadd(158220.000000,183924.000000,44525.000000,5.315694)}
{pt3dadd(158268.000000,183612.000000,44775.000000,5.263623)}
{pt3dadd(158232.000000,183708.000000,44975.000000,5.374770)}

{create adhoc55}
{access adhoc55}
{connect adhoc55(1), adhoc51(0)}
{nseg = 1}
{strdef color color = "White"}
{pt3dclear()}
{pt3dadd(155604.000000,203448.000000,57725.000000,23.110527)}
{pt3dadd(155112.000000,203340.000000,58800.000000,11.299376)}
{pt3dadd(154908.000000,203172.000000,59025.000000,7.379626)}
{pt3dadd(154728.000000,202992.000000,59150.000000,5.967316)}
{pt3dadd(154872.000000,202368.000000,59400.000000,4.409795)}
{pt3dadd(154956.000000,201912.000000,59650.000000,4.409795)}
{pt3dadd(155028.000000,201456.000000,59900.000000,4.409795)}
{pt3dadd(155052.000000,201300.000000,59825.000000,6.677632)}
{pt3dadd(155040.000000,201120.000000,59900.000000,3.767836)}
{pt3dadd(155148.000000,200964.000000,60050.000000,3.767836)}
{pt3dadd(155112.000000,200808.000000,60100.000000,3.767836)}
{pt3dadd(155280.000000,200652.000000,60075.000000,6.677632)}
{pt3dadd(155460.000000,200508.000000,60150.000000,4.409795)}
{pt3dadd(155568.000000,200340.000000,60200.000000,4.409795)}
{pt3dadd(155700.000000,200184.000000,60300.000000,4.409795)}
{pt3dadd(155772.000000,200028.000000,60350.000000,7.191199)}
{pt3dadd(155856.000000,199836.000000,60325.000000,4.281404)}
{pt3dadd(156036.000000,199680.000000,60425.000000,4.281404)}
{pt3dadd(156108.000000,199524.000000,60475.000000,4.281404)}
{pt3dadd(156288.000000,199356.000000,60475.000000,7.833158)}
{pt3dadd(156504.000000,199140.000000,60475.000000,5.051754)}
{pt3dadd(156636.000000,198948.000000,60475.000000,5.051754)}
{pt3dadd(156840.000000,198588.000000,60475.000000,5.051754)}
{pt3dadd(157032.000000,198228.000000,60475.000000,6.534974)}
{pt3dadd(157164.000000,197892.000000,60475.000000,2.983220)}
{pt3dadd(157308.000000,197544.000000,60475.000000,2.983220)}
{pt3dadd(157452.000000,197160.000000,60475.000000,2.983220)}
{pt3dadd(157620.000000,196728.000000,60475.000000,5.358049)}
{pt3dadd(157728.000000,196320.000000,60475.000000,3.874829)}
{pt3dadd(157848.000000,195888.000000,60475.000000,3.874829)}
{pt3dadd(157812.000000,195696.000000,60175.000000,3.874829)}
{pt3dadd(157848.000000,195468.000000,60075.000000,6.784625)}
{pt3dadd(157872.000000,195312.000000,59925.000000,4.409795)}
{pt3dadd(157872.000000,195156.000000,59875.000000,4.409795)}
{pt3dadd(157920.000000,195000.000000,59750.000000,4.409795)}
{pt3dadd(157884.000000,194856.000000,59700.000000,6.677632)}
{pt3dadd(157896.000000,194712.000000,59450.000000,3.767836)}
{pt3dadd(157980.000000,194520.000000,59300.000000,3.767836)}
{pt3dadd(158064.000000,194376.000000,59200.000000,3.767836)}
{pt3dadd(158148.000000,194208.000000,59100.000000,5.696861)}
{pt3dadd(158172.000000,194064.000000,59025.000000,4.418969)}
{pt3dadd(158292.000000,193884.000000,58925.000000,6.364949)}
{pt3dadd(158412.000000,193716.000000,58825.000000,6.449724)}

{create adhoc56}
{access adhoc56}
{connect adhoc56(1), adhoc55(0)}
{nseg = 1}
{strdef color color = "White"}
{pt3dclear()}
{pt3dadd(158412.000000,193716.000000,58825.000000,6.449724)}
{pt3dadd(157908.000000,193608.000000,59300.000000,5.745775)}
{pt3dadd(157908.000000,193464.000000,59300.000000,4.047465)}
{pt3dadd(157848.000000,193308.000000,59525.000000,4.243537)}
{pt3dadd(157704.000000,193116.000000,59425.000000,2.686016)}
{pt3dadd(157716.000000,193272.000000,59750.000000,3.675961)}
{pt3dadd(157596.000000,193296.000000,60025.000000,3.894361)}
{pt3dadd(157548.000000,193692.000000,60400.000000,3.513908)}
{pt3dadd(157560.000000,193716.000000,60650.000000,2.592000)}

{create adhoc57}
{access adhoc57}
{connect adhoc57(1), adhoc55(0)}
{nseg = 1}
{strdef color color = "White"}
{pt3dclear()}
{pt3dadd(158412.000000,193716.000000,58825.000000,6.449724)}
{pt3dadd(158520.000000,193536.000000,58800.000000,5.745775)}
{pt3dadd(158592.000000,193344.000000,58600.000000,4.047465)}
{pt3dadd(158676.000000,193152.000000,58400.000000,5.967316)}
{pt3dadd(158700.000000,193032.000000,58300.000000,4.409795)}
{pt3dadd(158748.000000,192852.000000,58225.000000,4.409795)}
{pt3dadd(158784.000000,192672.000000,58100.000000,4.409795)}
{pt3dadd(158832.000000,192504.000000,58100.000000,6.784625)}
{pt3dadd(159072.000000,192324.000000,58025.000000,3.874829)}
{pt3dadd(159192.000000,192144.000000,57975.000000,3.874829)}
{pt3dadd(159348.000000,191964.000000,57875.000000,3.874829)}
{pt3dadd(159336.000000,191796.000000,57950.000000,5.803854)}
{pt3dadd(159540.000000,191616.000000,57975.000000,3.429025)}
{pt3dadd(159672.000000,191448.000000,58075.000000,3.429025)}
{pt3dadd(159648.000000,191292.000000,57900.000000,3.429025)}
{pt3dadd(159864.000000,190956.000000,57675.000000,5.358049)}
{pt3dadd(159924.000000,190368.000000,57350.000000,3.429025)}
{pt3dadd(159960.000000,189912.000000,57075.000000,3.429025)}
{pt3dadd(160044.000000,189036.000000,56850.000000,3.429025)}
{pt3dadd(159888.000000,188796.000000,56625.000000,5.358049)}
{pt3dadd(159864.000000,188712.000000,56450.000000,3.429025)}
{pt3dadd(159828.000000,188520.000000,56275.000000,3.816995)}
{pt3dadd(159732.000000,188328.000000,56150.000000,4.806940)}
{pt3dadd(159600.000000,188016.000000,55925.000000,3.796526)}
{pt3dadd(159660.000000,187896.000000,55550.000000,6.449724)}
