# Supplementary material for: Full reconstruction of large lobula plate tangential cells in Drosophila from a 3D EM dataset
Source: PLoS One. 2018 Nov 28;13(11):e0207828. doi: 10.1371/journal.pone.0207828 (PMC6261601; doi:10.1371/journal.pone.0207828)
Supplement: S1 Dataset — (ZIP) [file pone.0207828.s001.zip › Diameter hoc/VS_VSL_preliminary/VS6_4skels_ck.001_completed.hoc0001.hoc]

/* created with convertKnossosNmlToHoc.m */

{create adhoc1}
{access adhoc1}
{nseg = 1}
{strdef color color = "White"}
{pt3dclear()}
{pt3dadd(180120.000000,211008.000000,84850.000000,10.271345)}
{pt3dadd(180288.000000,211104.000000,85050.000000,7.638823)}
{pt3dadd(180600.000000,211392.000000,85575.000000,6.173238)}
{pt3dadd(181236.000000,211284.000000,86000.000000,20.680807)}
{pt3dadd(182304.000000,211140.000000,86300.000000,30.252971)}
{pt3dadd(184188.000000,210888.000000,87075.000000,82.809190)}

{create adhoc2}
{access adhoc2}
{connect adhoc2(1), adhoc1(0)}
{nseg = 1}
{strdef color color = "White"}
{pt3dclear()}
{pt3dadd(184188.000000,210888.000000,87075.000000,82.809190)}
{pt3dadd(183864.000000,211704.000000,86800.000000,54.602003)}
{pt3dadd(183576.000000,212388.000000,86475.000000,48.960567)}
{pt3dadd(183372.000000,213120.000000,86100.000000,48.298094)}
{pt3dadd(183168.000000,213816.000000,85700.000000,53.497884)}
{pt3dadd(183084.000000,214416.000000,85450.000000,79.496826)}

{create adhoc3}
{access adhoc3}
{connect adhoc3(1), adhoc1(0)}
{nseg = 1}
{strdef color color = "White"}
{pt3dclear()}
{pt3dadd(184188.000000,210888.000000,87075.000000,82.809190)}
{pt3dadd(184692.000000,209904.000000,87225.000000,59.901790)}
{pt3dadd(184812.000000,209616.000000,87950.000000,63.544138)}
{pt3dadd(184812.000000,208440.000000,89300.000000,46.505107)}
{pt3dadd(185472.000000,207048.000000,89275.000000,69.007660)}

{create adhoc4}
{access adhoc4}
{connect adhoc4(1), adhoc3(0)}
{nseg = 1}
{strdef color color = "White"}
{pt3dclear()}
{pt3dadd(185472.000000,207048.000000,89275.000000,69.007660)}
{pt3dadd(185748.000000,206220.000000,89650.000000,42.671349)}
{pt3dadd(186408.000000,205380.000000,89800.000000,26.202809)}
{pt3dadd(187068.000000,204816.000000,90000.000000,23.902554)}
{pt3dadd(187632.000000,204000.000000,89875.000000,12.701277)}
{pt3dadd(188004.000000,203424.000000,90300.000000,12.701277)}
{pt3dadd(188376.000000,202920.000000,90725.000000,12.701277)}
{pt3dadd(188748.000000,202248.000000,91150.000000,28.300643)}
{pt3dadd(189120.000000,201768.000000,91575.000000,17.099366)}
{pt3dadd(189492.000000,201264.000000,92000.000000,17.099366)}
{pt3dadd(189864.000000,200760.000000,92425.000000,17.099366)}
{pt3dadd(190812.000000,200292.000000,93050.000000,30.600898)}
{pt3dadd(191724.000000,199716.000000,93625.000000,31.263370)}
{pt3dadd(191988.000000,199224.000000,93400.000000,51.105617)}
{pt3dadd(192144.000000,199092.000000,94400.000000,82.809190)}

{create adhoc5}
{access adhoc5}
{connect adhoc5(1), adhoc4(0)}
{nseg = 1}
{strdef color color = "White"}
{pt3dclear()}
{pt3dadd(192144.000000,199092.000000,94400.000000,82.809190)}
{pt3dadd(192348.000000,198792.000000,95475.000000,67.851473)}
{pt3dadd(192480.000000,198672.000000,96475.000000,41.310884)}
{pt3dadd(192672.000000,198324.000000,97200.000000,53.367902)}
{pt3dadd(192816.000000,198300.000000,98250.000000,29.818856)}
{pt3dadd(193080.000000,198276.000000,99600.000000,29.818856)}
{pt3dadd(193344.000000,198252.000000,100800.000000,29.818856)}
{pt3dadd(193320.000000,198036.000000,101825.000000,46.080694)}
{pt3dadd(192900.000000,197988.000000,103100.000000,17.761838)}
{pt3dadd(192540.000000,197916.000000,103975.000000,17.761838)}
{pt3dadd(192444.000000,197112.000000,104800.000000,17.761838)}
{pt3dadd(192420.000000,196260.000000,105950.000000,37.336043)}
{pt3dadd(192384.000000,196068.000000,106875.000000,21.074205)}
{pt3dadd(192072.000000,195396.000000,108025.000000,21.074205)}
{pt3dadd(192036.000000,195072.000000,109475.000000,21.074205)}
{pt3dadd(191952.000000,194700.000000,110525.000000,34.575737)}
{pt3dadd(191136.000000,193692.000000,111475.000000,15.001532)}
{pt3dadd(190140.000000,193176.000000,112050.000000,15.001532)}
{pt3dadd(189396.000000,192240.000000,113600.000000,15.001532)}
{pt3dadd(188544.000000,190524.000000,114675.000000,24.285930)}
{pt3dadd(187668.000000,188856.000000,116300.000000,10.784398)}
{pt3dadd(186900.000000,188304.000000,117275.000000,10.784398)}
{pt3dadd(186024.000000,187404.000000,118225.000000,10.784398)}
{pt3dadd(184932.000000,186396.000000,120175.000000,18.471396)}
{pt3dadd(184356.000000,185388.000000,121300.000000,9.186998)}
{pt3dadd(182664.000000,184548.000000,122350.000000,9.186998)}
{pt3dadd(180840.000000,183816.000000,124225.000000,9.186998)}
{pt3dadd(178956.000000,182748.000000,125375.000000,18.471396)}
{pt3dadd(178236.000000,181740.000000,126200.000000,10.784398)}
{pt3dadd(177516.000000,180948.000000,126900.000000,10.784398)}
{pt3dadd(176268.000000,180180.000000,127550.000000,10.784398)}
{pt3dadd(175392.000000,179064.000000,127600.000000,16.030924)}
{pt3dadd(174660.000000,179160.000000,127850.000000,6.746526)}
{pt3dadd(174096.000000,177828.000000,127875.000000,6.746526)}
{pt3dadd(173292.000000,177360.000000,127975.000000,6.746526)}
{pt3dadd(172548.000000,177348.000000,128875.000000,12.836125)}
{pt3dadd(172332.000000,176712.000000,128500.000000,7.589598)}
{pt3dadd(171372.000000,176460.000000,128850.000000,7.589598)}
{pt3dadd(169812.000000,174576.000000,130250.000000,7.589598)}
{pt3dadd(168624.000000,172692.000000,130975.000000,15.276596)}
{pt3dadd(167544.000000,171060.000000,132025.000000,9.186998)}
{pt3dadd(165852.000000,169584.000000,133050.000000,9.186998)}
{pt3dadd(164988.000000,168408.000000,133550.000000,9.186998)}
{pt3dadd(163656.000000,167232.000000,134050.000000,16.873996)}
{pt3dadd(162828.000000,166908.000000,134475.000000,9.186998)}
{pt3dadd(161028.000000,166068.000000,135400.000000,9.186998)}
{pt3dadd(158880.000000,165384.000000,136750.000000,9.186998)}
{pt3dadd(157980.000000,165000.000000,137600.000000,18.088020)}
{pt3dadd(158352.000000,164400.000000,138600.000000,10.401022)}
{pt3dadd(156336.000000,162552.000000,140350.000000,10.401022)}
{pt3dadd(155292.000000,161232.000000,141350.000000,10.401022)}
{pt3dadd(154704.000000,160704.000000,143050.000000,23.902554)}
{pt3dadd(154020.000000,159264.000000,144025.000000,15.001532)}
{pt3dadd(153180.000000,158604.000000,145175.000000,15.001532)}
{pt3dadd(152400.000000,157644.000000,146250.000000,15.001532)}
{pt3dadd(151392.000000,156612.000000,148425.000000,15.001532)}
{pt3dadd(151476.000000,156552.000000,150425.000000,1.500000)}
{pt3dadd(150984.000000,154884.000000,151750.000000,1.500000)}
{pt3dadd(151164.000000,153732.000000,153525.000000,1.500000)}
{pt3dadd(150648.000000,153072.000000,154650.000000,29.818856)}
{pt3dadd(150624.000000,152544.000000,155950.000000,29.818856)}
{pt3dadd(150684.000000,151860.000000,157150.000000,29.818856)}
{pt3dadd(150420.000000,151176.000000,158750.000000,29.818856)}
{pt3dadd(150504.000000,150024.000000,159850.000000,46.080694)}
{pt3dadd(151068.000000,149124.000000,160775.000000,17.761838)}
{pt3dadd(152580.000000,148272.000000,161600.000000,17.761838)}
{pt3dadd(154068.000000,147024.000000,162450.000000,17.761838)}
{pt3dadd(155388.000000,146076.000000,163250.000000,25.448836)}
{pt3dadd(156816.000000,144912.000000,163525.000000,9.186998)}
{pt3dadd(157428.000000,143976.000000,163975.000000,9.186998)}
{pt3dadd(158796.000000,142752.000000,164850.000000,9.186998)}
{pt3dadd(159852.000000,141360.000000,165650.000000,25.448836)}
{pt3dadd(160860.000000,140244.000000,166275.000000,17.661838)}
{pt3dadd(161424.000000,138864.000000,167025.000000,17.661838)}
{pt3dadd(162252.000000,138444.000000,167825.000000,17.661838)}
{pt3dadd(162588.000000,137364.000000,168275.000000,43.736976)}
{pt3dadd(162432.000000,136716.000000,169025.000000,27.475138)}
{pt3dadd(162384.000000,135888.000000,169625.000000,27.575138)}
{pt3dadd(162480.000000,135540.000000,170625.000000,27.575138)}
{pt3dadd(162588.000000,135216.000000,171725.000000,51.124184)}
{pt3dadd(162696.000000,134568.000000,173600.000000,25.049046)}
{pt3dadd(161904.000000,133920.000000,174900.000000,25.049046)}
{pt3dadd(161316.000000,133848.000000,176000.000000,25.049046)}
{pt3dadd(161184.000000,133908.000000,177325.000000,48.598092)}
{pt3dadd(161088.000000,133968.000000,178525.000000,47.644131)}
{pt3dadd(160992.000000,133980.000000,179800.000000,247.344131)}
{pt3dadd(160668.000000,133548.000000,181100.000000,411.240219)}
{pt3dadd(160272.000000,132852.000000,182550.000000,1000.000000)}

{create adhoc6}
{access adhoc6}
{connect adhoc6(1), adhoc4(0)}
{nseg = 1}
{strdef color color = "White"}
{pt3dclear()}
{pt3dadd(192144.000000,199092.000000,94400.000000,82.809190)}
{pt3dadd(193476.000000,197256.000000,93550.000000,48.454250)}
{pt3dadd(193428.000000,196836.000000,93275.000000,29.672550)}
{pt3dadd(193380.000000,196164.000000,93000.000000,21.097710)}
{pt3dadd(193500.000000,195684.000000,92725.000000,9.186998)}
{pt3dadd(193620.000000,194928.000000,92475.000000,9.186998)}
{pt3dadd(193980.000000,194196.000000,92425.000000,9.186998)}
{pt3dadd(194148.000000,193740.000000,91975.000000,18.471396)}
{pt3dadd(194364.000000,193164.000000,91400.000000,10.784398)}
{pt3dadd(194544.000000,192732.000000,90825.000000,10.784398)}
{pt3dadd(194736.000000,192240.000000,90250.000000,10.784398)}
{pt3dadd(195084.000000,191736.000000,89625.000000,21.525624)}
{pt3dadd(195492.000000,191136.000000,89200.000000,12.241226)}
{pt3dadd(195768.000000,190716.000000,88625.000000,12.241226)}
{pt3dadd(196296.000000,189612.000000,87975.000000,12.241226)}
{pt3dadd(196236.000000,189120.000000,87350.000000,23.442503)}
{pt3dadd(196452.000000,188544.000000,86900.000000,12.701277)}
{pt3dadd(196824.000000,188052.000000,86750.000000,12.701277)}
{pt3dadd(196860.000000,187524.000000,86725.000000,21.602299)}
{pt3dadd(196596.000000,187092.000000,86675.000000,32.803576)}
{pt3dadd(196368.000000,186660.000000,86550.000000,35.003831)}
{pt3dadd(196488.000000,186276.000000,86550.000000,57.506386)}

{create adhoc7}
{access adhoc7}
{connect adhoc7(1), adhoc6(0)}
{nseg = 1}
{strdef color color = "White"}
{pt3dclear()}
{pt3dadd(196488.000000,186276.000000,86550.000000,57.506386)}
{pt3dadd(196512.000000,185760.000000,86300.000000,38.070838)}
{pt3dadd(196548.000000,185100.000000,85950.000000,34.643780)}
{pt3dadd(196548.000000,184272.000000,85650.000000,32.343524)}
{pt3dadd(196452.000000,183564.000000,85375.000000,35.003831)}
{pt3dadd(196356.000000,183000.000000,85100.000000,46.005108)}

{create adhoc8}
{access adhoc8}
{connect adhoc8(1), adhoc7(0)}
{nseg = 1}
{strdef color color = "White"}
{pt3dclear()}
{pt3dadd(196356.000000,183000.000000,85100.000000,46.005108)}
{pt3dadd(195216.000000,183132.000000,83275.000000,17.984944)}
{pt3dadd(194904.000000,182916.000000,82950.000000,11.390966)}
{pt3dadd(194628.000000,182604.000000,82725.000000,4.418969)}
{pt3dadd(194268.000000,182208.000000,82400.000000,4.367372)}
{pt3dadd(193896.000000,181908.000000,82025.000000,6.278953)}
{pt3dadd(193608.000000,181992.000000,81700.000000,6.191735)}

{create adhoc9}
{access adhoc9}
{connect adhoc9(1), adhoc8(0)}
{nseg = 1}
{strdef color color = "White"}
{pt3dclear()}
{pt3dadd(193608.000000,181992.000000,81700.000000,6.191735)}
{pt3dadd(193404.000000,182016.000000,81500.000000,6.435391)}
{pt3dadd(192852.000000,182004.000000,81350.000000,6.951369)}
{pt3dadd(192720.000000,181776.000000,80825.000000,7.739669)}

{create adhoc10}
{access adhoc10}
{connect adhoc10(1), adhoc9(0)}
{nseg = 1}
{strdef color color = "White"}
{pt3dclear()}
{pt3dadd(192720.000000,181776.000000,80825.000000,7.739669)}
{pt3dadd(192744.000000,181464.000000,80450.000000,6.794931)}
{pt3dadd(192816.000000,181056.000000,80250.000000,6.520687)}
{pt3dadd(192816.000000,180696.000000,79875.000000,4.572881)}
{pt3dadd(193452.000000,180384.000000,79775.000000,4.478975)}

{create adhoc11}
{access adhoc11}
{connect adhoc11(1), adhoc9(0)}
{nseg = 1}
{strdef color color = "White"}
{pt3dclear()}
{pt3dadd(192720.000000,181776.000000,80825.000000,7.739669)}
{pt3dadd(191964.000000,182424.000000,81025.000000,5.864471)}
{pt3dadd(191904.000000,182508.000000,81200.000000,4.478975)}

{create adhoc12}
{access adhoc12}
{connect adhoc12(1), adhoc8(0)}
{nseg = 1}
{strdef color color = "White"}
{pt3dclear()}
{pt3dadd(193608.000000,181992.000000,81700.000000,6.191735)}
{pt3dadd(193320.000000,182304.000000,82100.000000,14.225470)}
{pt3dadd(193308.000000,182304.000000,82475.000000,14.741448)}
{pt3dadd(193044.000000,182352.000000,82525.000000,7.739669)}

{create adhoc13}
{access adhoc13}
{connect adhoc13(1), adhoc7(0)}
{nseg = 1}
{strdef color color = "White"}
{pt3dclear()}
{pt3dadd(196356.000000,183000.000000,85100.000000,46.005108)}
{pt3dadd(196836.000000,182664.000000,85325.000000,31.809033)}
{pt3dadd(196800.000000,182292.000000,85400.000000,19.685420)}
{pt3dadd(196788.000000,181572.000000,85200.000000,20.068796)}
{pt3dadd(196860.000000,181188.000000,85100.000000,10.784398)}
{pt3dadd(197184.000000,180780.000000,85050.000000,10.784398)}
{pt3dadd(197256.000000,180408.000000,85100.000000,10.784398)}
{pt3dadd(196872.000000,179940.000000,85125.000000,20.068796)}
{pt3dadd(196920.000000,179292.000000,84850.000000,10.784398)}
{pt3dadd(196992.000000,178644.000000,84525.000000,10.784398)}
{pt3dadd(197040.000000,177972.000000,84225.000000,10.784398)}
{pt3dadd(196776.000000,177480.000000,84300.000000,21.083975)}
{pt3dadd(196800.000000,177000.000000,83975.000000,23.000855)}
{pt3dadd(197292.000000,176544.000000,83575.000000,35.950325)}
{pt3dadd(197232.000000,176064.000000,83500.000000,58.917208)}
{pt3dadd(197652.000000,175632.000000,83300.000000,66.247350)}

{create adhoc14}
{access adhoc14}
{connect adhoc14(1), adhoc13(0)}
{nseg = 1}
{strdef color color = "White"}
{pt3dclear()}
{pt3dadd(197652.000000,175632.000000,83300.000000,66.247350)}
{pt3dadd(197772.000000,175272.000000,83575.000000,41.751245)}
{pt3dadd(197748.000000,174756.000000,83125.000000,29.202502)}
{pt3dadd(198936.000000,170244.000000,83575.000000,24.786013)}
{pt3dadd(199116.000000,169344.000000,84000.000000,21.641226)}
{pt3dadd(199056.000000,168828.000000,83450.000000,44.164906)}

{create adhoc15}
{access adhoc15}
{connect adhoc15(1), adhoc14(0)}
{nseg = 1}
{strdef color color = "White"}
{pt3dclear()}
{pt3dadd(199056.000000,168828.000000,83450.000000,44.164906)}
{pt3dadd(199020.000000,168108.000000,83725.000000,40.812496)}
{pt3dadd(199116.000000,167712.000000,83950.000000,40.812496)}
{pt3dadd(199080.000000,167232.000000,84150.000000,44.164906)}

{create adhoc16}
{access adhoc16}
{connect adhoc16(1), adhoc15(0)}
{nseg = 1}
{strdef color color = "White"}
{pt3dclear()}
{pt3dadd(199080.000000,167232.000000,84150.000000,44.164906)}
{pt3dadd(197940.000000,167364.000000,85950.000000,16.258435)}
{pt3dadd(197760.000000,167400.000000,86175.000000,11.130015)}
{pt3dadd(197832.000000,167556.000000,86775.000000,3.844968)}
{pt3dadd(197676.000000,167844.000000,87325.000000,4.871480)}
{pt3dadd(197556.000000,168096.000000,87700.000000,7.739669)}

{create adhoc17}
{access adhoc17}
{connect adhoc17(1), adhoc15(0)}
{nseg = 1}
{strdef color color = "White"}
{pt3dclear()}
{pt3dadd(199080.000000,167232.000000,84150.000000,44.164906)}
{pt3dadd(199212.000000,166704.000000,84125.000000,28.533299)}
{pt3dadd(199308.000000,166044.000000,84000.000000,17.719979)}
{pt3dadd(199308.000000,165768.000000,84125.000000,15.276596)}
{pt3dadd(199500.000000,165300.000000,84375.000000,13.945430)}
{pt3dadd(199692.000000,164904.000000,84425.000000,22.242384)}
{pt3dadd(199932.000000,164496.000000,84600.000000,33.279160)}

{create adhoc18}
{access adhoc18}
{connect adhoc18(1), adhoc17(0)}
{nseg = 1}
{strdef color color = "White"}
{pt3dclear()}
{pt3dadd(199932.000000,164496.000000,84600.000000,33.279160)}
{pt3dadd(199836.000000,163992.000000,84750.000000,22.242384)}
{pt3dadd(199824.000000,163608.000000,84725.000000,21.312949)}
{pt3dadd(200028.000000,163080.000000,84950.000000,24.241515)}
{pt3dadd(199920.000000,162504.000000,84900.000000,29.253194)}
{pt3dadd(199968.000000,162072.000000,85000.000000,47.921990)}

{create adhoc19}
{access adhoc19}
{connect adhoc19(1), adhoc18(0)}
{nseg = 1}
{strdef color color = "White"}
{pt3dclear()}
{pt3dadd(199968.000000,162072.000000,85000.000000,47.921990)}
{pt3dadd(199956.000000,161676.000000,85050.000000,31.809033)}
{pt3dadd(200256.000000,161328.000000,85225.000000,19.685420)}
{pt3dadd(200448.000000,160884.000000,85150.000000,21.142248)}
{pt3dadd(200628.000000,160560.000000,85325.000000,21.525624)}
{pt3dadd(200604.000000,160284.000000,85425.000000,34.876040)}
{pt3dadd(200388.000000,159984.000000,85600.000000,47.921990)}

{create adhoc20}
{access adhoc20}
{connect adhoc20(1), adhoc19(0)}
{nseg = 1}
{strdef color color = "White"}
{pt3dclear()}
{pt3dadd(200388.000000,159984.000000,85600.000000,47.921990)}
{pt3dadd(198972.000000,160236.000000,86525.000000,19.258578)}
{pt3dadd(198300.000000,160080.000000,86300.000000,5.374770)}

{create adhoc21}
{access adhoc21}
{connect adhoc21(1), adhoc19(0)}
{nseg = 1}
{strdef color color = "White"}
{pt3dclear()}
{pt3dadd(200388.000000,159984.000000,85600.000000,47.921990)}
{pt3dadd(200652.000000,159600.000000,85375.000000,32.447993)}
{pt3dadd(200532.000000,159072.000000,85600.000000,35.325650)}
{pt3dadd(200568.000000,158448.000000,85800.000000,26.928090)}
{pt3dadd(200832.000000,157872.000000,85925.000000,33.279160)}

{create adhoc22}
{access adhoc22}
{connect adhoc22(1), adhoc21(0)}
{nseg = 1}
{strdef color color = "White"}
{pt3dclear()}
{pt3dadd(200832.000000,157872.000000,85925.000000,33.279160)}
{pt3dadd(199932.000000,157548.000000,85200.000000,16.942712)}
{pt3dadd(199728.000000,157224.000000,85325.000000,10.765627)}
{pt3dadd(199620.000000,156696.000000,85400.000000,8.731901)}
{pt3dadd(199572.000000,156144.000000,85250.000000,10.144211)}
{pt3dadd(199284.000000,155616.000000,84875.000000,15.907018)}
{pt3dadd(199092.000000,155076.000000,84425.000000,23.110527)}

{create adhoc23}
{access adhoc23}
{connect adhoc23(1), adhoc22(0)}
{nseg = 1}
{strdef color color = "White"}
{pt3dclear()}
{pt3dadd(199092.000000,155076.000000,84425.000000,23.110527)}
{pt3dadd(198264.000000,155388.000000,83425.000000,11.299376)}
{pt3dadd(197724.000000,155436.000000,82800.000000,7.379626)}
{pt3dadd(196776.000000,155424.000000,81875.000000,3.832474)}
{pt3dadd(196644.000000,155544.000000,81425.000000,2.274954)}
{pt3dadd(196812.000000,155712.000000,81225.000000,2.274954)}
{pt3dadd(197172.000000,155916.000000,80850.000000,2.274954)}
{pt3dadd(197184.000000,156168.000000,80600.000000,2.870749)}
{pt3dadd(197532.000000,156720.000000,80175.000000,2.691590)}
{pt3dadd(197928.000000,157152.000000,80075.000000,3.485983)}
{pt3dadd(198432.000000,157596.000000,79875.000000,4.478975)}

{create adhoc24}
{access adhoc24}
{connect adhoc24(1), adhoc22(0)}
{nseg = 1}
{strdef color color = "White"}
{pt3dclear()}
{pt3dadd(199092.000000,155076.000000,84425.000000,23.110527)}
{pt3dadd(199044.000000,154560.000000,84225.000000,14.623100)}
{pt3dadd(199008.000000,154176.000000,84200.000000,9.373860)}
{pt3dadd(199080.000000,153804.000000,83900.000000,8.603509)}
{pt3dadd(199152.000000,153468.000000,83700.000000,5.051754)}
{pt3dadd(199116.000000,153108.000000,83450.000000,5.051754)}
{pt3dadd(199056.000000,152772.000000,83200.000000,5.051754)}
{pt3dadd(198996.000000,152460.000000,82950.000000,10.076420)}
{pt3dadd(198936.000000,152088.000000,82875.000000,6.524665)}
{pt3dadd(198936.000000,151680.000000,82675.000000,6.524665)}
{pt3dadd(198936.000000,151344.000000,82100.000000,6.524665)}
{pt3dadd(198852.000000,150996.000000,81475.000000,9.434461)}
{pt3dadd(198672.000000,151092.000000,81000.000000,4.409795)}
{pt3dadd(198084.000000,150516.000000,80400.000000,4.409795)}
{pt3dadd(197268.000000,150012.000000,79725.000000,4.409795)}
{pt3dadd(196836.000000,149940.000000,78975.000000,9.656322)}
{pt3dadd(196188.000000,149820.000000,78100.000000,6.746526)}
{pt3dadd(195780.000000,150144.000000,77400.000000,6.746526)}
{pt3dadd(195492.000000,150372.000000,76325.000000,6.746526)}
{pt3dadd(195108.000000,150876.000000,75500.000000,11.068632)}
{pt3dadd(194772.000000,151092.000000,74400.000000,7.070039)}
{pt3dadd(194412.000000,150756.000000,73300.000000,10.783399)}
{pt3dadd(194484.000000,150252.000000,72475.000000,7.739669)}

{create adhoc25}
{access adhoc25}
{connect adhoc25(1), adhoc24(0)}
{nseg = 1}
{strdef color color = "White"}
{pt3dclear()}
{pt3dadd(194484.000000,150252.000000,72475.000000,7.739669)}
{pt3dadd(194700.000000,150792.000000,72175.000000,6.951369)}
{pt3dadd(195060.000000,151512.000000,72125.000000,5.374770)}

{create adhoc26}
{access adhoc26}
{connect adhoc26(1), adhoc24(0)}
{nseg = 1}
{strdef color color = "White"}
{pt3dclear()}
{pt3dadd(194484.000000,150252.000000,72475.000000,7.739669)}
{pt3dadd(194796.000000,148824.000000,72150.000000,5.229798)}
{pt3dadd(194712.000000,148656.000000,72175.000000,7.253649)}
{pt3dadd(195024.000000,148296.000000,71925.000000,7.359617)}
{pt3dadd(195120.000000,148032.000000,71875.000000,7.739669)}

{create adhoc27}
{access adhoc27}
{connect adhoc27(1), adhoc26(0)}
{nseg = 1}
{strdef color color = "White"}
{pt3dclear()}
{pt3dadd(195120.000000,148032.000000,71875.000000,7.739669)}
{pt3dadd(194928.000000,147744.000000,71650.000000,5.317041)}
{pt3dadd(194472.000000,147444.000000,71450.000000,3.732480)}

{create adhoc28}
{access adhoc28}
{connect adhoc28(1), adhoc26(0)}
{nseg = 1}
{strdef color color = "White"}
{pt3dclear()}
{pt3dadd(195120.000000,148032.000000,71875.000000,7.739669)}
{pt3dadd(195312.000000,147756.000000,71950.000000,6.521388)}
{pt3dadd(195540.000000,147816.000000,72225.000000,5.374770)}

{create adhoc29}
{access adhoc29}
{connect adhoc29(1), adhoc21(0)}
{nseg = 1}
{strdef color color = "White"}
{pt3dclear()}
{pt3dadd(200832.000000,157872.000000,85925.000000,33.279160)}
{pt3dadd(201072.000000,157392.000000,86225.000000,18.988422)}
{pt3dadd(201240.000000,157128.000000,86425.000000,11.993053)}
{pt3dadd(201612.000000,156612.000000,86825.000000,14.921619)}
{pt3dadd(201648.000000,156192.000000,87200.000000,10.784398)}
{pt3dadd(201480.000000,155796.000000,87525.000000,10.784398)}
{pt3dadd(201528.000000,155244.000000,87825.000000,10.784398)}
{pt3dadd(201624.000000,154680.000000,88150.000000,18.151917)}
{pt3dadd(201708.000000,154200.000000,88275.000000,8.867519)}
{pt3dadd(201984.000000,153720.000000,88425.000000,8.867519)}
{pt3dadd(202032.000000,152952.000000,88575.000000,8.867519)}
{pt3dadd(202188.000000,152424.000000,88725.000000,15.223351)}
{pt3dadd(202320.000000,151896.000000,88675.000000,13.102358)}
{pt3dadd(202272.000000,151464.000000,88675.000000,18.348885)}
{pt3dadd(202152.000000,151020.000000,88875.000000,29.581475)}
{pt3dadd(202032.000000,150564.000000,88825.000000,27.732632)}

{create adhoc30}
{access adhoc30}
{connect adhoc30(1), adhoc29(0)}
{nseg = 1}
{strdef color color = "White"}
{pt3dclear()}
{pt3dadd(202032.000000,150564.000000,88825.000000,27.732632)}
{pt3dadd(202008.000000,150132.000000,88875.000000,18.618653)}
{pt3dadd(201984.000000,149808.000000,88900.000000,11.771192)}
{pt3dadd(202080.000000,149424.000000,88950.000000,12.880497)}
{pt3dadd(202044.000000,149100.000000,88950.000000,7.855832)}
{pt3dadd(202008.000000,148728.000000,88950.000000,15.542830)}
{pt3dadd(202116.000000,148068.000000,89275.000000,23.229828)}
{pt3dadd(202176.000000,147708.000000,89300.000000,27.123327)}
{pt3dadd(202176.000000,147312.000000,89475.000000,39.934990)}

{create adhoc31}
{access adhoc31}
{connect adhoc31(1), adhoc30(0)}
{nseg = 1}
{strdef color color = "White"}
{pt3dclear()}
{pt3dadd(202176.000000,147312.000000,89475.000000,39.934990)}
{pt3dadd(202212.000000,147000.000000,89675.000000,27.123327)}
{pt3dadd(202260.000000,146520.000000,89950.000000,16.873996)}
{pt3dadd(202212.000000,146076.000000,90175.000000,15.542830)}
{pt3dadd(201972.000000,145488.000000,90275.000000,7.855832)}
{pt3dadd(201732.000000,144996.000000,90375.000000,7.855832)}
{pt3dadd(201480.000000,143976.000000,90275.000000,7.855832)}
{pt3dadd(201420.000000,143424.000000,90325.000000,13.102358)}
{pt3dadd(201276.000000,142968.000000,90225.000000,6.746526)}
{pt3dadd(201168.000000,142296.000000,90325.000000,6.746526)}
{pt3dadd(201120.000000,141708.000000,90225.000000,6.746526)}
{pt3dadd(201012.000000,141036.000000,90250.000000,13.102358)}
{pt3dadd(201192.000000,140544.000000,90150.000000,7.855832)}
{pt3dadd(201156.000000,139980.000000,90075.000000,7.855832)}
{pt3dadd(201252.000000,139440.000000,90250.000000,14.211664)}
{pt3dadd(201252.000000,138948.000000,90200.000000,20.567496)}
{pt3dadd(201168.000000,138192.000000,90175.000000,22.686107)}
{pt3dadd(200928.000000,137592.000000,90450.000000,33.279160)}

{create adhoc32}
{access adhoc32}
{connect adhoc32(1), adhoc31(0)}
{nseg = 1}
{strdef color color = "White"}
{pt3dclear()}
{pt3dadd(200928.000000,137592.000000,90450.000000,33.279160)}
{pt3dadd(200580.000000,137148.000000,91400.000000,16.942712)}
{pt3dadd(200496.000000,136776.000000,91625.000000,10.765627)}
{pt3dadd(200364.000000,136368.000000,91700.000000,7.067943)}
{pt3dadd(200268.000000,135828.000000,92025.000000,4.158147)}
{pt3dadd(199908.000000,135300.000000,92225.000000,4.158147)}
{pt3dadd(199728.000000,134868.000000,92475.000000,4.158147)}
{pt3dadd(199524.000000,134412.000000,92425.000000,6.939551)}
{pt3dadd(199236.000000,133944.000000,92500.000000,4.281404)}
{pt3dadd(199152.000000,133416.000000,92700.000000,4.281404)}
{pt3dadd(199044.000000,132948.000000,92650.000000,4.281404)}
{pt3dadd(198708.000000,132528.000000,92550.000000,7.191199)}
{pt3dadd(198600.000000,132072.000000,92625.000000,4.409795)}
{pt3dadd(198492.000000,131616.000000,92775.000000,4.409795)}
{pt3dadd(198444.000000,131124.000000,92875.000000,4.409795)}
{pt3dadd(198480.000000,130668.000000,93150.000000,7.319591)}
{pt3dadd(198444.000000,130152.000000,93350.000000,4.409795)}
{pt3dadd(198384.000000,129768.000000,93625.000000,4.409795)}
{pt3dadd(198204.000000,129204.000000,93725.000000,4.409795)}
{pt3dadd(198060.000000,128760.000000,93850.000000,7.319591)}
{pt3dadd(197796.000000,128220.000000,94100.000000,4.409795)}
{pt3dadd(197664.000000,127680.000000,94025.000000,4.409795)}
{pt3dadd(197808.000000,126984.000000,94150.000000,4.409795)}
{pt3dadd(197676.000000,126636.000000,94200.000000,7.961550)}
{pt3dadd(197616.000000,126204.000000,94225.000000,9.373860)}
{pt3dadd(197508.000000,125664.000000,94300.000000,15.729692)}
{pt3dadd(197304.000000,125328.000000,94250.000000,25.216153)}
{pt3dadd(197100.000000,124956.000000,94325.000000,33.279160)}

{create adhoc33}
{access adhoc33}
{connect adhoc33(1), adhoc32(0)}
{nseg = 1}
{strdef color color = "White"}
{pt3dclear()}
{pt3dadd(197100.000000,124956.000000,94325.000000,33.279160)}
{pt3dadd(196884.000000,124692.000000,95025.000000,16.942712)}
{pt3dadd(196608.000000,124668.000000,95350.000000,13.571082)}
{pt3dadd(196284.000000,124572.000000,95575.000000,6.175757)}
{pt3dadd(195912.000000,124296.000000,95650.000000,7.739669)}

{create adhoc34}
{access adhoc34}
{connect adhoc34(1), adhoc32(0)}
{nseg = 1}
{strdef color color = "White"}
{pt3dclear()}
{pt3dadd(197100.000000,124956.000000,94325.000000,33.279160)}
{pt3dadd(197124.000000,124536.000000,93525.000000,15.308094)}
{pt3dadd(197064.000000,124200.000000,93475.000000,9.784857)}
{pt3dadd(196800.000000,123672.000000,93325.000000,4.986545)}
{pt3dadd(196620.000000,123144.000000,93225.000000,3.057520)}
{pt3dadd(196428.000000,122520.000000,92975.000000,3.057520)}
{pt3dadd(196248.000000,122052.000000,92875.000000,3.057520)}
{pt3dadd(196056.000000,121728.000000,92675.000000,5.432350)}
{pt3dadd(195852.000000,121188.000000,92425.000000,3.874829)}
{pt3dadd(195612.000000,120744.000000,92300.000000,6.249659)}
{pt3dadd(195204.000000,120312.000000,92100.000000,7.732878)}
{pt3dadd(195024.000000,119916.000000,92000.000000,7.930082)}
{pt3dadd(194712.000000,119688.000000,91700.000000,8.916098)}

{create adhoc35}
{access adhoc35}
{connect adhoc35(1), adhoc34(0)}
{nseg = 1}
{strdef color color = "White"}
{pt3dclear()}
{pt3dadd(194712.000000,119688.000000,91700.000000,8.916098)}
{pt3dadd(194436.000000,119904.000000,91225.000000,5.621941)}
{pt3dadd(194244.000000,119748.000000,91000.000000,5.343913)}
{pt3dadd(194136.000000,119748.000000,90675.000000,3.784582)}
{pt3dadd(193800.000000,119760.000000,90350.000000,4.478975)}

{create adhoc36}
{access adhoc36}
{connect adhoc36(1), adhoc34(0)}
{nseg = 1}
{strdef color color = "White"}
{pt3dclear()}
{pt3dadd(194712.000000,119688.000000,91700.000000,8.916098)}
{pt3dadd(194436.000000,119220.000000,91325.000000,6.007783)}
{pt3dadd(194184.000000,118872.000000,91050.000000,3.732480)}

{create adhoc37}
{access adhoc37}
{connect adhoc37(1), adhoc31(0)}
{nseg = 1}
{strdef color color = "White"}
{pt3dclear()}
{pt3dadd(200928.000000,137592.000000,90450.000000,33.279160)}
{pt3dadd(200772.000000,137004.000000,90075.000000,19.258772)}

{create adhoc38}
{access adhoc38}
{connect adhoc38(1), adhoc30(0)}
{nseg = 1}
{strdef color color = "White"}
{pt3dclear()}
{pt3dadd(202176.000000,147312.000000,89475.000000,39.934990)}
{pt3dadd(201756.000000,147192.000000,88000.000000,15.961571)}
{pt3dadd(201636.000000,146952.000000,87675.000000,10.176943)}
{pt3dadd(201516.000000,146724.000000,87350.000000,3.085740)}
{pt3dadd(201300.000000,146484.000000,87250.000000,4.470624)}
{pt3dadd(200928.000000,145800.000000,87250.000000,6.451041)}
{pt3dadd(200472.000000,145464.000000,87300.000000,13.374147)}

{create adhoc39}
{access adhoc39}
{connect adhoc39(1), adhoc38(0)}
{nseg = 1}
{strdef color color = "White"}
{pt3dclear()}
{pt3dadd(200472.000000,145464.000000,87300.000000,13.374147)}
{pt3dadd(200244.000000,145092.000000,87275.000000,8.673090)}
{pt3dadd(200220.000000,145104.000000,87050.000000,6.399649)}
{pt3dadd(200028.000000,144744.000000,86825.000000,5.953844)}
{pt3dadd(199740.000000,144456.000000,86700.000000,5.708033)}
{pt3dadd(199560.000000,144108.000000,86475.000000,11.145123)}

{create adhoc40}
{access adhoc40}
{connect adhoc40(1), adhoc38(0)}
{nseg = 1}
{strdef color color = "White"}
{pt3dclear()}
{pt3dadd(200472.000000,145464.000000,87300.000000,13.374147)}
{pt3dadd(200208.000000,145464.000000,87575.000000,7.107957)}
{pt3dadd(199956.000000,145536.000000,87850.000000,7.670228)}
{pt3dadd(199644.000000,145356.000000,88275.000000,6.175757)}
{pt3dadd(199440.000000,145320.000000,88875.000000,7.739669)}

{create adhoc41}
{access adhoc41}
{connect adhoc41(1), adhoc29(0)}
{nseg = 1}
{strdef color color = "White"}
{pt3dclear()}
{pt3dadd(202032.000000,150564.000000,88825.000000,27.732632)}
{pt3dadd(201324.000000,150072.000000,87975.000000,11.894119)}
{pt3dadd(201132.000000,149820.000000,87800.000000,7.736471)}
{pt3dadd(200976.000000,149508.000000,87625.000000,3.479890)}
{pt3dadd(200796.000000,149076.000000,87175.000000,2.489945)}
{pt3dadd(200712.000000,148812.000000,86800.000000,2.489945)}
{pt3dadd(200340.000000,147948.000000,85650.000000,3.479890)}
{pt3dadd(200304.000000,147648.000000,85300.000000,4.469834)}
{pt3dadd(200376.000000,147408.000000,84950.000000,4.799816)}
{pt3dadd(200352.000000,147312.000000,84725.000000,6.449724)}

{create adhoc42}
{access adhoc42}
{connect adhoc42(1), adhoc18(0)}
{nseg = 1}
{strdef color color = "White"}
{pt3dclear()}
{pt3dadd(199968.000000,162072.000000,85000.000000,47.921990)}
{pt3dadd(198420.000000,161736.000000,84250.000000,9.287602)}

{create adhoc43}
{access adhoc43}
{connect adhoc43(1), adhoc42(0)}
{nseg = 1}
{strdef color color = "White"}
{pt3dclear()}
{pt3dadd(198420.000000,161736.000000,84250.000000,9.287602)}
{pt3dadd(198240.000000,161808.000000,83875.000000,8.053916)}
{pt3dadd(197748.000000,161340.000000,83550.000000,5.432350)}
{pt3dadd(197508.000000,161352.000000,83350.000000,7.272514)}
{pt3dadd(197388.000000,161232.000000,83050.000000,4.897684)}
{pt3dadd(197364.000000,161268.000000,82625.000000,4.897684)}
{pt3dadd(197400.000000,161232.000000,82125.000000,5.344180)}
{pt3dadd(197808.000000,161376.000000,81850.000000,6.076136)}
{pt3dadd(198156.000000,161652.000000,81700.000000,3.464087)}
{pt3dadd(198648.000000,161808.000000,81300.000000,5.159780)}

{create adhoc44}
{access adhoc44}
{connect adhoc44(1), adhoc42(0)}
{nseg = 1}
{strdef color color = "White"}
{pt3dclear()}
{pt3dadd(198420.000000,161736.000000,84250.000000,9.287602)}
{pt3dadd(197568.000000,161868.000000,85075.000000,6.175757)}
{pt3dadd(197652.000000,162072.000000,85350.000000,5.080408)}
{pt3dadd(197388.000000,162408.000000,85725.000000,4.512833)}
{pt3dadd(197436.000000,162768.000000,85950.000000,4.441498)}
{pt3dadd(197460.000000,163056.000000,86050.000000,6.449724)}

{create adhoc45}
{access adhoc45}
{connect adhoc45(1), adhoc17(0)}
{nseg = 1}
{strdef color color = "White"}
{pt3dclear()}
{pt3dadd(199932.000000,164496.000000,84600.000000,33.279160)}
{pt3dadd(199260.000000,164556.000000,85925.000000,13.742961)}
{pt3dadd(199176.000000,164652.000000,86175.000000,8.845777)}
{pt3dadd(199212.000000,164784.000000,86375.000000,3.737879)}
{pt3dadd(199236.000000,164916.000000,86550.000000,3.995868)}
{pt3dadd(199080.000000,164964.000000,86750.000000,5.659779)}
{pt3dadd(199080.000000,165096.000000,87075.000000,7.739669)}

{create adhoc46}
{access adhoc46}
{connect adhoc46(1), adhoc14(0)}
{nseg = 1}
{strdef color color = "White"}
{pt3dclear()}
{pt3dadd(199056.000000,168828.000000,83450.000000,44.164906)}
{pt3dadd(198420.000000,168264.000000,82075.000000,17.801525)}
{pt3dadd(198216.000000,167976.000000,81675.000000,11.280915)}
{pt3dadd(198012.000000,167904.000000,81400.000000,3.343729)}
{pt3dadd(197808.000000,167844.000000,80950.000000,2.095795)}
{pt3dadd(197388.000000,167844.000000,80575.000000,2.095795)}
{pt3dadd(197076.000000,167724.000000,80050.000000,2.095795)}
{pt3dadd(197052.000000,167820.000000,79575.000000,3.085740)}
{pt3dadd(196884.000000,167952.000000,79075.000000,4.329808)}
{pt3dadd(196344.000000,168108.000000,78600.000000,6.704638)}
{pt3dadd(196008.000000,168156.000000,78325.000000,10.174396)}
{pt3dadd(195924.000000,168096.000000,78100.000000,13.374147)}

{create adhoc47}
{access adhoc47}
{connect adhoc47(1), adhoc46(0)}
{nseg = 1}
{strdef color color = "White"}
{pt3dclear()}
{pt3dadd(195924.000000,168096.000000,78100.000000,13.374147)}
{pt3dadd(195636.000000,168072.000000,78175.000000,11.145123)}

{create adhoc48}
{access adhoc48}
{connect adhoc48(1), adhoc46(0)}
{nseg = 1}
{strdef color color = "White"}
{pt3dclear()}
{pt3dadd(195924.000000,168096.000000,78100.000000,13.374147)}
{pt3dadd(195948.000000,167700.000000,77825.000000,8.053916)}
{pt3dadd(195804.000000,167568.000000,77675.000000,7.276079)}
{pt3dadd(195684.000000,166860.000000,77350.000000,4.572881)}
{pt3dadd(195588.000000,166428.000000,77125.000000,4.478975)}

{create adhoc49}
{access adhoc49}
{connect adhoc49(1), adhoc13(0)}
{nseg = 1}
{strdef color color = "White"}
{pt3dclear()}
{pt3dadd(197652.000000,175632.000000,83300.000000,66.247350)}
{pt3dadd(197544.000000,175512.000000,81425.000000,35.894113)}
{pt3dadd(197592.000000,175464.000000,80800.000000,22.136468)}
{pt3dadd(197628.000000,175416.000000,80150.000000,18.088020)}
{pt3dadd(197304.000000,175308.000000,79475.000000,18.088020)}
{pt3dadd(197064.000000,175356.000000,78800.000000,29.146700)}
{pt3dadd(196644.000000,175452.000000,78125.000000,39.934990)}

{create adhoc50}
{access adhoc50}
{connect adhoc50(1), adhoc49(0)}
{nseg = 1}
{strdef color color = "White"}
{pt3dclear()}
{pt3dadd(196644.000000,175452.000000,78125.000000,39.934990)}
{pt3dadd(196260.000000,175416.000000,77750.000000,27.123327)}
{pt3dadd(195936.000000,175440.000000,77350.000000,16.873996)}
{pt3dadd(195648.000000,175572.000000,77025.000000,14.433524)}
{pt3dadd(195036.000000,175572.000000,76625.000000,6.746526)}
{pt3dadd(194436.000000,175632.000000,76250.000000,6.746526)}
{pt3dadd(194004.000000,175524.000000,75775.000000,11.993053)}
{pt3dadd(193512.000000,175620.000000,75250.000000,16.315158)}
{pt3dadd(192936.000000,175764.000000,74775.000000,17.447720)}
{pt3dadd(192660.000000,175884.000000,74300.000000,23.110527)}

{create adhoc51}
{access adhoc51}
{connect adhoc51(1), adhoc50(0)}
{nseg = 1}
{strdef color color = "White"}
{pt3dclear()}
{pt3dadd(192660.000000,175884.000000,74300.000000,23.110527)}
{pt3dadd(192492.000000,175920.000000,74025.000000,15.907018)}
{pt3dadd(192384.000000,176184.000000,73750.000000,10.144211)}
{pt3dadd(192144.000000,176352.000000,73325.000000,11.068632)}
{pt3dadd(191928.000000,176364.000000,72950.000000,6.746526)}
{pt3dadd(191928.000000,176580.000000,72450.000000,6.746526)}
{pt3dadd(192264.000000,176856.000000,71925.000000,6.746526)}
{pt3dadd(192084.000000,177060.000000,71375.000000,11.068632)}
{pt3dadd(191712.000000,177324.000000,70875.000000,11.068632)}
{pt3dadd(190860.000000,177552.000000,70200.000000,17.424464)}
{pt3dadd(189924.000000,177588.000000,69850.000000,28.040773)}
{pt3dadd(189300.000000,177684.000000,69400.000000,33.279160)}

{create adhoc52}
{access adhoc52}
{connect adhoc52(1), adhoc51(0)}
{nseg = 1}
{strdef color color = "White"}
{pt3dclear()}
{pt3dadd(189300.000000,177684.000000,69400.000000,33.279160)}
{pt3dadd(188964.000000,177720.000000,68850.000000,33.279160)}
{pt3dadd(188652.000000,177768.000000,68775.000000,33.279160)}

{create adhoc53}
{access adhoc53}
{connect adhoc53(1), adhoc52(0)}
{nseg = 1}
{strdef color color = "White"}
{pt3dclear()}
{pt3dadd(188652.000000,177768.000000,68775.000000,33.279160)}
{pt3dadd(188472.000000,177588.000000,68400.000000,25.686923)}
{pt3dadd(188448.000000,177528.000000,68100.000000,17.689737)}
{pt3dadd(188268.000000,177372.000000,67700.000000,9.287602)}

{create adhoc54}
{access adhoc54}
{connect adhoc54(1), adhoc53(0)}
{nseg = 1}
{strdef color color = "White"}
{pt3dclear()}
{pt3dadd(188268.000000,177372.000000,67700.000000,9.287602)}
{pt3dadd(188148.000000,176916.000000,67350.000000,8.053916)}
{pt3dadd(188040.000000,176664.000000,67050.000000,6.680284)}
{pt3dadd(188052.000000,176268.000000,66625.000000,6.962627)}
{pt3dadd(188100.000000,175656.000000,66375.000000,6.646329)}
{pt3dadd(188124.000000,175332.000000,66200.000000,10.699317)}

{create adhoc55}
{access adhoc55}
{connect adhoc55(1), adhoc54(0)}
{nseg = 1}
{strdef color color = "White"}
{pt3dclear()}
{pt3dadd(188124.000000,175332.000000,66200.000000,10.699317)}
{pt3dadd(187824.000000,174636.000000,65075.000000,8.524488)}
{pt3dadd(187596.000000,174636.000000,64675.000000,5.714693)}
{pt3dadd(187332.000000,174576.000000,64250.000000,6.249659)}
{pt3dadd(187500.000000,174132.000000,63875.000000,3.874829)}
{pt3dadd(187512.000000,173232.000000,63525.000000,3.874829)}
{pt3dadd(187752.000000,173052.000000,63325.000000,4.470624)}
{pt3dadd(187800.000000,172956.000000,63050.000000,5.066419)}
{pt3dadd(187248.000000,172020.000000,63150.000000,3.485983)}
{pt3dadd(186936.000000,171672.000000,63050.000000,4.478975)}

{create adhoc56}
{access adhoc56}
{connect adhoc56(1), adhoc54(0)}
{nseg = 1}
{strdef color color = "White"}
{pt3dclear()}
{pt3dadd(188124.000000,175332.000000,66200.000000,10.699317)}
{pt3dadd(187752.000000,174264.000000,65775.000000,11.145123)}

{create adhoc57}
{access adhoc57}
{connect adhoc57(1), adhoc53(0)}
{nseg = 1}
{strdef color color = "White"}
{pt3dclear()}
{pt3dadd(188268.000000,177372.000000,67700.000000,9.287602)}
{pt3dadd(187716.000000,178008.000000,67575.000000,6.691735)}
{pt3dadd(187512.000000,178092.000000,67375.000000,4.615041)}
{pt3dadd(187020.000000,178068.000000,66975.000000,6.455204)}
{pt3dadd(186696.000000,178248.000000,66700.000000,7.807479)}
{pt3dadd(186636.000000,178416.000000,66300.000000,12.012466)}
{pt3dadd(186600.000000,178320.000000,66075.000000,16.048977)}

{create adhoc58}
{access adhoc58}
{connect adhoc58(1), adhoc52(0)}
{nseg = 1}
{strdef color color = "White"}
{pt3dclear()}
{pt3dadd(188652.000000,177768.000000,68775.000000,33.279160)}
{pt3dadd(187860.000000,180144.000000,69725.000000,13.742961)}
{pt3dadd(188136.000000,180576.000000,70175.000000,11.617869)}
{pt3dadd(188352.000000,180744.000000,70625.000000,6.120153)}
{pt3dadd(188376.000000,180924.000000,71075.000000,9.287602)}

{create adhoc59}
{access adhoc59}
{connect adhoc59(1), adhoc51(0)}
{nseg = 1}
{strdef color color = "White"}
{pt3dclear()}
{pt3dadd(189300.000000,177684.000000,69400.000000,33.279160)}
{pt3dadd(187776.000000,180228.000000,69000.000000,17.780127)}
{pt3dadd(187584.000000,180408.000000,68800.000000,11.145123)}
{pt3dadd(187464.000000,180552.000000,68475.000000,13.374147)}

{create adhoc60}
{access adhoc60}
{connect adhoc60(1), adhoc50(0)}
{nseg = 1}
{strdef color color = "White"}
{pt3dclear()}
{pt3dadd(192660.000000,175884.000000,74300.000000,23.110527)}
{pt3dadd(192768.000000,175116.000000,74250.000000,11.299376)}
{pt3dadd(192732.000000,174828.000000,74025.000000,7.379626)}
{pt3dadd(192732.000000,174348.000000,73800.000000,4.615041)}
{pt3dadd(192732.000000,174024.000000,73550.000000,4.047465)}
{pt3dadd(192612.000000,173988.000000,73350.000000,5.745775)}
{pt3dadd(192456.000000,174144.000000,73325.000000,6.449724)}

{create adhoc61}
{access adhoc61}
{connect adhoc61(1), adhoc49(0)}
{nseg = 1}
{strdef color color = "White"}
{pt3dclear()}
{pt3dadd(196644.000000,175452.000000,78125.000000,39.934990)}
{pt3dadd(195444.000000,174420.000000,78075.000000,16.907531)}
{pt3dadd(195108.000000,174480.000000,78125.000000,10.744518)}
{pt3dadd(194772.000000,174396.000000,78175.000000,3.832474)}
{pt3dadd(194124.000000,174384.000000,78025.000000,3.264899)}
{pt3dadd(193788.000000,174192.000000,77725.000000,4.441498)}
{pt3dadd(193620.000000,174108.000000,77450.000000,6.449724)}

{create adhoc62}
{access adhoc62}
{connect adhoc62(1), adhoc6(0)}
{nseg = 1}
{strdef color color = "White"}
{pt3dclear()}
{pt3dadd(196488.000000,186276.000000,86550.000000,57.506386)}
{pt3dadd(194676.000000,187020.000000,87975.000000,11.145123)}

{create adhoc63}
{access adhoc63}
{connect adhoc63(1), adhoc62(0)}
{nseg = 1}
{strdef color color = "White"}
{pt3dclear()}
{pt3dadd(194676.000000,187020.000000,87975.000000,11.145123)}
{pt3dadd(194016.000000,187284.000000,88050.000000,6.006631)}
{pt3dadd(193464.000000,187692.000000,88350.000000,4.203979)}
{pt3dadd(193260.000000,187980.000000,88400.000000,3.686845)}
{pt3dadd(192840.000000,188256.000000,88250.000000,3.901836)}
{pt3dadd(192528.000000,188508.000000,88200.000000,5.503059)}
{pt3dadd(192516.000000,188652.000000,88075.000000,6.449724)}

{create adhoc64}
{access adhoc64}
{connect adhoc64(1), adhoc62(0)}
{nseg = 1}
{strdef color color = "White"}
{pt3dclear()}
{pt3dadd(194676.000000,187020.000000,87975.000000,11.145123)}
{pt3dadd(194676.000000,186480.000000,88950.000000,7.930082)}
{pt3dadd(194904.000000,186192.000000,89050.000000,5.358049)}
{pt3dadd(195144.000000,185700.000000,89225.000000,4.986545)}
{pt3dadd(195540.000000,184452.000000,89650.000000,3.057520)}
{pt3dadd(195384.000000,184056.000000,89725.000000,3.057520)}
{pt3dadd(195216.000000,184056.000000,90100.000000,3.057520)}
{pt3dadd(195120.000000,184008.000000,90475.000000,4.305454)}
{pt3dadd(195264.000000,184164.000000,90975.000000,2.747934)}
{pt3dadd(195432.000000,183960.000000,91350.000000,4.305454)}
{pt3dadd(195576.000000,183648.000000,91650.000000,5.295399)}
{pt3dadd(195528.000000,183372.000000,91825.000000,5.745775)}
{pt3dadd(195624.000000,183252.000000,91875.000000,6.449724)}

{create adhoc65}
{access adhoc65}
{connect adhoc65(1), adhoc4(0)}
{nseg = 1}
{strdef color color = "White"}
{pt3dclear()}
{pt3dadd(192144.000000,199092.000000,94400.000000,82.809190)}
{pt3dadd(193476.000000,198876.000000,94325.000000,470.204830)}
{pt3dadd(193584.000000,198876.000000,94525.000000,357.355930)}
{pt3dadd(193716.000000,198828.000000,94775.000000,376.576746)}
{pt3dadd(193776.000000,198888.000000,94975.000000,204.636610)}
{pt3dadd(193836.000000,198888.000000,95400.000000,204.636610)}
{pt3dadd(194004.000000,198696.000000,95800.000000,219.203746)}
{pt3dadd(194016.000000,198708.000000,96050.000000,227.705548)}
{pt3dadd(194124.000000,198672.000000,96325.000000,244.790174)}
{pt3dadd(194160.000000,198708.000000,96525.000000,251.988710)}
{pt3dadd(194100.000000,198684.000000,96725.000000,256.903810)}
{pt3dadd(194172.000000,198720.000000,96975.000000,267.754500)}
{pt3dadd(194160.000000,198696.000000,97175.000000,270.152110)}
{pt3dadd(194268.000000,198708.000000,97375.000000,281.545340)}
{pt3dadd(194340.000000,198624.000000,97600.000000,289.878540)}
{pt3dadd(194304.000000,198564.000000,97825.000000,298.211740)}
{pt3dadd(194196.000000,198468.000000,98075.000000,292.521904)}
{pt3dadd(194400.000000,198444.000000,98325.000000,309.645650)}
{pt3dadd(194472.000000,198336.000000,98625.000000,300.895784)}
{pt3dadd(194496.000000,198288.000000,98900.000000,295.205948)}
{pt3dadd(194256.000000,198144.000000,99025.000000,295.205948)}
{pt3dadd(194592.000000,198168.000000,99250.000000,300.895784)}
{pt3dadd(194508.000000,198024.000000,99550.000000,300.895784)}
{pt3dadd(194784.000000,197952.000000,99850.000000,319.774710)}
{pt3dadd(194868.000000,197808.000000,100000.000000,331.737602)}
{pt3dadd(195024.000000,197772.000000,100125.000000,341.384332)}
{pt3dadd(195048.000000,197640.000000,100400.000000,344.444362)}
{pt3dadd(194988.000000,197484.000000,100525.000000,332.481470)}
{pt3dadd(194916.000000,197340.000000,100675.000000,325.565436)}
{pt3dadd(194892.000000,197316.000000,100825.000000,328.939110)}
{pt3dadd(194892.000000,197268.000000,100975.000000,319.292380)}
{pt3dadd(194880.000000,197148.000000,101125.000000,313.318046)}
{pt3dadd(194856.000000,197040.000000,101325.000000,316.093578)}
{pt3dadd(194856.000000,197028.000000,101475.000000,309.820522)}
{pt3dadd(194808.000000,196812.000000,101650.000000,297.259488)}
{pt3dadd(194772.000000,196728.000000,101800.000000,294.345184)}
{pt3dadd(194616.000000,196500.000000,101975.000000,303.532544)}
{pt3dadd(194472.000000,196404.000000,102125.000000,306.446848)}
{pt3dadd(194400.000000,196272.000000,102250.000000,284.696746)}
{pt3dadd(194316.000000,196224.000000,102400.000000,284.696746)}
{pt3dadd(194304.000000,196164.000000,102550.000000,284.696746)}
{pt3dadd(194112.000000,196008.000000,102725.000000,258.646108)}
{pt3dadd(194124.000000,195816.000000,103050.000000,255.731804)}
{pt3dadd(194280.000000,195756.000000,103200.000000,283.754962)}
{pt3dadd(194388.000000,195780.000000,103475.000000,289.729296)}
{pt3dadd(194556.000000,195900.000000,103625.000000,289.729296)}
{pt3dadd(194532.000000,195840.000000,103775.000000,301.173678)}
{pt3dadd(194496.000000,195816.000000,103925.000000,304.087982)}
{pt3dadd(194556.000000,195840.000000,104075.000000,292.125090)}
{pt3dadd(194472.000000,195840.000000,104250.000000,292.937346)}
{pt3dadd(194532.000000,195852.000000,104425.000000,305.498380)}
{pt3dadd(194508.000000,195876.000000,104575.000000,317.703866)}
{pt3dadd(194508.000000,195900.000000,104700.000000,323.976922)}
{pt3dadd(194340.000000,195780.000000,105025.000000,332.726788)}
{pt3dadd(194268.000000,195636.000000,105300.000000,325.940198)}
{pt3dadd(194328.000000,195576.000000,105450.000000,292.664774)}
{pt3dadd(194136.000000,195516.000000,105600.000000,288.792488)}
{pt3dadd(193884.000000,195384.000000,105775.000000,288.792488)}
{pt3dadd(194208.000000,195252.000000,106100.000000,314.952968)}
{pt3dadd(194004.000000,195048.000000,106350.000000,356.355928)}
{pt3dadd(194016.000000,194868.000000,106600.000000,413.726176)}
{pt3dadd(194004.000000,194796.000000,106900.000000,467.928336)}
{pt3dadd(193860.000000,194592.000000,107050.000000,515.857440)}
{pt3dadd(193752.000000,194364.000000,107300.000000,546.609216)}
{pt3dadd(193812.000000,194328.000000,107575.000000,537.341070)}
{pt3dadd(193836.000000,194448.000000,107825.000000,528.514264)}
{pt3dadd(193908.000000,194400.000000,108075.000000,517.785224)}
{pt3dadd(193944.000000,194316.000000,108375.000000,497.324618)}
{pt3dadd(193932.000000,194340.000000,108675.000000,466.572842)}
{pt3dadd(193884.000000,194352.000000,108900.000000,454.260904)}
{pt3dadd(193884.000000,194376.000000,109200.000000,442.535246)}
{pt3dadd(193860.000000,194424.000000,109475.000000,412.251216)}
{pt3dadd(193776.000000,194316.000000,109750.000000,399.323682)}
{pt3dadd(193800.000000,194244.000000,110025.000000,367.188868)}
{pt3dadd(193848.000000,194304.000000,110300.000000,379.500806)}
{pt3dadd(193932.000000,194364.000000,110575.000000,415.018516)}
{pt3dadd(193764.000000,194304.000000,110875.000000,426.744174)}
{pt3dadd(193704.000000,194364.000000,111175.000000,444.418810)}
{pt3dadd(193392.000000,194412.000000,111450.000000,468.147134)}
{pt3dadd(193260.000000,194496.000000,111725.000000,504.957552)}
{pt3dadd(193116.000000,194640.000000,111975.000000,477.064772)}
{pt3dadd(192468.000000,194844.000000,112250.000000,469.058596)}
{pt3dadd(192060.000000,195036.000000,112400.000000,440.216670)}
{pt3dadd(191520.000000,195312.000000,112500.000000,425.675706)}
{pt3dadd(190980.000000,195756.000000,112575.000000,384.559526)}
{pt3dadd(190824.000000,196260.000000,112575.000000,363.745506)}
{pt3dadd(190440.000000,196620.000000,112575.000000,367.650954)}
{pt3dadd(190080.000000,197196.000000,112675.000000,342.472488)}
{pt3dadd(189996.000000,197568.000000,112975.000000,349.388522)}
{pt3dadd(189924.000000,198096.000000,113050.000000,327.533804)}
{pt3dadd(189804.000000,198588.000000,113050.000000,319.200604)}
{pt3dadd(189540.000000,198984.000000,113150.000000,311.575674)}
{pt3dadd(189240.000000,199248.000000,113150.000000,321.417574)}
{pt3dadd(188976.000000,199584.000000,113150.000000,311.288514)}
{pt3dadd(188868.000000,199884.000000,113150.000000,308.228484)}
{pt3dadd(189024.000000,200136.000000,113150.000000,305.710994)}
{pt3dadd(189084.000000,200244.000000,113350.000000,313.335924)}
{pt3dadd(189012.000000,200352.000000,113450.000000,335.934332)}
{pt3dadd(189060.000000,200460.000000,113575.000000,381.581102)}
{pt3dadd(189288.000000,200628.000000,113575.000000,384.641132)}
{pt3dadd(189348.000000,200580.000000,113800.000000,420.406570)}
{pt3dadd(189384.000000,200664.000000,114075.000000,412.781640)}
{pt3dadd(189420.000000,200628.000000,114225.000000,416.687088)}
{pt3dadd(189456.000000,200544.000000,114400.000000,381.169378)}
{pt3dadd(189504.000000,200496.000000,114575.000000,411.850902)}
{pt3dadd(189348.000000,200520.000000,114725.000000,389.996184)}
{pt3dadd(189468.000000,200340.000000,114900.000000,383.080150)}
{pt3dadd(189576.000000,200232.000000,115050.000000,379.174702)}
{pt3dadd(189732.000000,200184.000000,115225.000000,305.085132)}
{pt3dadd(189696.000000,199872.000000,115400.000000,305.085132)}
{pt3dadd(189780.000000,199464.000000,115750.000000,340.513758)}
{pt3dadd(189828.000000,199308.000000,115900.000000,394.212988)}
{pt3dadd(190032.000000,199020.000000,116075.000000,415.793072)}
{pt3dadd(190200.000000,198756.000000,116175.000000,501.608300)}
{pt3dadd(190380.000000,198480.000000,116175.000000,501.608300)}
{pt3dadd(190512.000000,198204.000000,116275.000000,501.608300)}
{pt3dadd(190572.000000,197904.000000,116300.000000,447.909070)}
{pt3dadd(190728.000000,197604.000000,116300.000000,422.609504)}
{pt3dadd(190932.000000,197136.000000,116300.000000,407.341486)}
{pt3dadd(190980.000000,196896.000000,116350.000000,360.351632)}
{pt3dadd(191040.000000,196416.000000,116350.000000,324.923006)}
{pt3dadd(191292.000000,195828.000000,116350.000000,321.709980)}
{pt3dadd(191376.000000,195408.000000,116200.000000,311.580920)}
{pt3dadd(191580.000000,194952.000000,116050.000000,318.842762)}
{pt3dadd(191736.000000,194724.000000,115950.000000,332.091062)}
{pt3dadd(191964.000000,194460.000000,115825.000000,338.677762)}
{pt3dadd(191988.000000,194244.000000,115700.000000,327.284532)}
{pt3dadd(192072.000000,194028.000000,115575.000000,324.224502)}
{pt3dadd(192216.000000,193788.000000,115500.000000,310.375960)}
{pt3dadd(192288.000000,193596.000000,115375.000000,335.290708)}
{pt3dadd(192420.000000,193452.000000,115250.000000,338.833068)}
{pt3dadd(192588.000000,193176.000000,115075.000000,347.166268)}
{pt3dadd(192708.000000,192924.000000,114975.000000,367.980288)}
{pt3dadd(192852.000000,192696.000000,114875.000000,374.566988)}
{pt3dadd(192948.000000,192504.000000,114750.000000,366.560812)}
{pt3dadd(193080.000000,192204.000000,114625.000000,366.560812)}
{pt3dadd(193224.000000,191988.000000,114625.000000,369.620842)}
{pt3dadd(193464.000000,191844.000000,114375.000000,335.558522)}
{pt3dadd(193692.000000,191556.000000,114150.000000,332.184848)}
{pt3dadd(193800.000000,191256.000000,114150.000000,306.943076)}
{pt3dadd(193776.000000,191148.000000,113925.000000,300.027042)}
{pt3dadd(193992.000000,190944.000000,113800.000000,291.277176)}
{pt3dadd(194100.000000,190620.000000,113700.000000,338.267030)}
{pt3dadd(194112.000000,190356.000000,113575.000000,348.902546)}
{pt3dadd(194316.000000,189948.000000,113450.000000,386.456256)}
{pt3dadd(194496.000000,189576.000000,113125.000000,383.243230)}
{pt3dadd(194748.000000,189264.000000,113125.000000,361.811306)}
{pt3dadd(194940.000000,188856.000000,113125.000000,296.307752)}
{pt3dadd(195132.000000,188436.000000,113125.000000,263.867444)}
{pt3dadd(195324.000000,188016.000000,113125.000000,221.398634)}
{pt3dadd(195516.000000,187596.000000,113125.000000,247.559114)}
{pt3dadd(195708.000000,187176.000000,113125.000000,644.331134)}
{pt3dadd(195876.000000,186708.000000,113125.000000,650.675308)}
{pt3dadd(196908.000000,181884.000000,113125.000000,637.462488)}
{pt3dadd(196788.000000,182736.000000,111475.000000,647.796484)}
{pt3dadd(197004.000000,180780.000000,111475.000000,607.725284)}
{pt3dadd(197412.000000,181020.000000,111475.000000,241.135054)}
{pt3dadd(198216.000000,180876.000000,111475.000000,260.863044)}
{pt3dadd(198708.000000,181452.000000,111475.000000,281.274400)}
{pt3dadd(198576.000000,182592.000000,111475.000000,262.438602)}
{pt3dadd(197928.000000,183300.000000,111475.000000,244.544736)}
{pt3dadd(197148.000000,184176.000000,111475.000000,228.236406)}
{pt3dadd(196476.000000,185244.000000,111475.000000,218.394506)}
{pt3dadd(195972.000000,184860.000000,111475.000000,229.787736)}
{pt3dadd(195684.000000,183912.000000,111475.000000,257.810894)}
{pt3dadd(195540.000000,182892.000000,111475.000000,299.744540)}
{pt3dadd(195384.000000,181752.000000,111475.000000,287.575014)}
{pt3dadd(195960.000000,180876.000000,111475.000000,357.308910)}
{pt3dadd(196668.000000,182904.000000,111475.000000,325.504324)}
{pt3dadd(196932.000000,182748.000000,111900.000000,313.541432)}
{pt3dadd(197484.000000,180324.000000,111900.000000,338.840998)}
{pt3dadd(198792.000000,180324.000000,111900.000000,402.747480)}
{pt3dadd(199332.000000,181104.000000,111900.000000,354.818376)}
{pt3dadd(199152.000000,181380.000000,111900.000000,377.873096)}
{pt3dadd(198744.000000,182508.000000,111900.000000,417.304486)}
{pt3dadd(198696.000000,183156.000000,111900.000000,385.088886)}
{pt3dadd(197796.000000,183912.000000,111900.000000,363.508802)}
{pt3dadd(197304.000000,184788.000000,111900.000000,337.458164)}
{pt3dadd(196776.000000,185520.000000,111900.000000,332.297310)}
{pt3dadd(195720.000000,186624.000000,111900.000000,342.028876)}
{pt3dadd(195552.000000,185352.000000,111900.000000,356.569840)}
{pt3dadd(196740.000000,183264.000000,111900.000000,388.368068)}
{pt3dadd(195396.000000,184692.000000,111900.000000,428.959670)}
{pt3dadd(195396.000000,183768.000000,111900.000000,494.012520)}
{pt3dadd(195228.000000,182880.000000,111900.000000,529.611552)}
{pt3dadd(195204.000000,181836.000000,111900.000000,521.986622)}
{pt3dadd(195876.000000,181200.000000,111900.000000,619.325902)}
{pt3dadd(196896.000000,180708.000000,111900.000000,580.805442)}
{pt3dadd(197052.000000,182316.000000,112325.000000,536.250012)}
{pt3dadd(197568.000000,179076.000000,112325.000000,536.250012)}
{pt3dadd(198912.000000,179292.000000,112325.000000,571.767722)}
{pt3dadd(199248.000000,180624.000000,112325.000000,446.535662)}
{pt3dadd(199668.000000,181428.000000,112325.000000,502.730758)}
{pt3dadd(199284.000000,182376.000000,112325.000000,522.304538)}
{pt3dadd(198372.000000,183012.000000,112325.000000,509.263314)}
{pt3dadd(197820.000000,183996.000000,112325.000000,520.528800)}
{pt3dadd(197244.000000,184668.000000,112325.000000,505.987836)}
{pt3dadd(196764.000000,185460.000000,112325.000000,480.688270)}
{pt3dadd(195720.000000,187392.000000,112325.000000,464.656850)}
{pt3dadd(195264.000000,186864.000000,112325.000000,404.898978)}
{pt3dadd(195324.000000,185988.000000,112325.000000,481.103886)}
{pt3dadd(195096.000000,185028.000000,112325.000000,495.644850)}
{pt3dadd(197016.000000,182748.000000,112325.000000,520.944416)}
{pt3dadd(194964.000000,184392.000000,112325.000000,556.462126)}
{pt3dadd(194808.000000,183348.000000,112325.000000,616.219998)}
{pt3dadd(194796.000000,182808.000000,112325.000000,540.015090)}
{pt3dadd(195012.000000,182004.000000,112325.000000,492.079310)}
{pt3dadd(195480.000000,181308.000000,112325.000000,644.299674)}
{pt3dadd(197064.000000,179400.000000,112325.000000,601.865930)}
{pt3dadd(197184.000000,181944.000000,112575.000000,552.743574)}
{pt3dadd(198132.000000,178884.000000,112575.000000,578.857068)}
{pt3dadd(199296.000000,179136.000000,112575.000000,665.951114)}
{pt3dadd(199344.000000,180360.000000,112575.000000,504.462604)}
{pt3dadd(199944.000000,181056.000000,112575.000000,504.462604)}
{pt3dadd(199536.000000,182088.000000,112575.000000,526.042688)}
{pt3dadd(198552.000000,183132.000000,112575.000000,483.430028)}
{pt3dadd(197580.000000,184140.000000,112575.000000,461.946398)}
{pt3dadd(197160.000000,185124.000000,112575.000000,442.372618)}
{pt3dadd(196572.000000,186168.000000,112575.000000,439.159592)}
{pt3dadd(195324.000000,188136.000000,112575.000000,400.670936)}
{pt3dadd(195084.000000,187668.000000,112575.000000,351.507980)}
{pt3dadd(195084.000000,187068.000000,112575.000000,326.208414)}
{pt3dadd(195048.000000,186396.000000,112575.000000,322.834740)}
{pt3dadd(195024.000000,185724.000000,112575.000000,498.488030)}
{pt3dadd(194820.000000,185052.000000,112575.000000,511.677120)}
{pt3dadd(196824.000000,182628.000000,112575.000000,514.452652)}
{pt3dadd(194724.000000,184572.000000,112575.000000,549.970362)}
{pt3dadd(194448.000000,183888.000000,112575.000000,597.899466)}
{pt3dadd(194748.000000,183408.000000,112575.000000,520.368766)}
{pt3dadd(194676.000000,182400.000000,112575.000000,540.921230)}
{pt3dadd(195060.000000,181764.000000,112575.000000,616.228034)}
{pt3dadd(195468.000000,180756.000000,112575.000000,584.429806)}
{pt3dadd(196524.000000,180024.000000,112575.000000,760.643886)}
{pt3dadd(197124.000000,179064.000000,112575.000000,662.521296)}
{pt3dadd(196980.000000,182064.000000,112850.000000,701.172242)}
{pt3dadd(197952.000000,178548.000000,112850.000000,722.229836)}
{pt3dadd(199044.000000,179064.000000,112850.000000,765.293550)}
{pt3dadd(199380.000000,180048.000000,112850.000000,534.877310)}
{pt3dadd(200040.000000,181044.000000,112850.000000,523.484080)}
{pt3dadd(199896.000000,182340.000000,112850.000000,457.364636)}
{pt3dadd(199056.000000,182880.000000,112850.000000,407.387662)}
{pt3dadd(198252.000000,183984.000000,112850.000000,413.446304)}
{pt3dadd(197424.000000,184680.000000,112850.000000,395.739864)}
{pt3dadd(196788.000000,185580.000000,112850.000000,388.541328)}
{pt3dadd(195516.000000,187200.000000,112850.000000,371.417578)}
{pt3dadd(194676.000000,189012.000000,112850.000000,317.093768)}
{pt3dadd(194844.000000,188076.000000,112850.000000,337.148628)}
{pt3dadd(195348.000000,186912.000000,112850.000000,585.271308)}
{pt3dadd(195756.000000,185976.000000,112850.000000,630.023554)}
{pt3dadd(196944.000000,182436.000000,112850.000000,679.362904)}
{pt3dadd(195468.000000,185760.000000,112850.000000,733.686714)}
{pt3dadd(195024.000000,184860.000000,112850.000000,672.515674)}
{pt3dadd(194856.000000,184308.000000,112850.000000,490.806234)}
{pt3dadd(194652.000000,183984.000000,112850.000000,515.787884)}
{pt3dadd(194460.000000,183192.000000,112850.000000,570.749322)}
{pt3dadd(194400.000000,182532.000000,112850.000000,620.726296)}
{pt3dadd(194556.000000,181944.000000,112850.000000,534.911068)}
{pt3dadd(194784.000000,181380.000000,112850.000000,579.654362)}
{pt3dadd(195300.000000,180876.000000,112850.000000,585.424488)}
{pt3dadd(195924.000000,180168.000000,112850.000000,841.107954)}
{pt3dadd(197604.000000,178584.000000,112850.000000,760.846950)}
{pt3dadd(197100.000000,181932.000000,113075.000000,875.949590)}
{pt3dadd(197772.000000,178140.000000,113075.000000,918.676690)}
{pt3dadd(199224.000000,178848.000000,113075.000000,944.790184)}
{pt3dadd(199632.000000,180336.000000,113075.000000,649.858784)}
{pt3dadd(199944.000000,181488.000000,113075.000000,575.769214)}
{pt3dadd(199284.000000,182400.000000,113075.000000,607.652834)}
{pt3dadd(198348.000000,183564.000000,113075.000000,564.925734)}
{pt3dadd(197460.000000,184752.000000,113075.000000,478.839954)}
{pt3dadd(196092.000000,186504.000000,113075.000000,441.546366)}
{pt3dadd(195480.000000,186060.000000,113075.000000,551.153646)}
{pt3dadd(195180.000000,185436.000000,113075.000000,582.894754)}
{pt3dadd(194520.000000,183960.000000,113075.000000,616.222920)}
{pt3dadd(194580.000000,183144.000000,113075.000000,725.524700)}
{pt3dadd(194328.000000,182340.000000,113075.000000,742.357682)}
{pt3dadd(194700.000000,181596.000000,113075.000000,710.559454)}
{pt3dadd(194940.000000,180924.000000,113075.000000,719.510826)}
{pt3dadd(195468.000000,180156.000000,113075.000000,646.934726)}
{pt3dadd(195996.000000,179304.000000,113075.000000,867.226746)}
{pt3dadd(197364.000000,178428.000000,113075.000000,846.674282)}
{pt3dadd(197184.000000,181872.000000,113300.000000,915.851490)}
{pt3dadd(197964.000000,177972.000000,113300.000000,882.523324)}
{pt3dadd(199320.000000,178872.000000,113300.000000,984.729564)}
{pt3dadd(199836.000000,179820.000000,113300.000000,672.044336)}
{pt3dadd(200040.000000,180840.000000,113300.000000,731.247746)}
{pt3dadd(199392.000000,182712.000000,113300.000000,699.364126)}
{pt3dadd(198564.000000,183456.000000,113300.000000,715.215812)}
{pt3dadd(197976.000000,184308.000000,113300.000000,613.009572)}
{pt3dadd(197280.000000,185064.000000,113300.000000,605.747730)}
{pt3dadd(195960.000000,186576.000000,113300.000000,605.747730)}
{pt3dadd(195708.000000,186384.000000,113300.000000,600.252370)}
{pt3dadd(195552.000000,185460.000000,113300.000000,801.935150)}
{pt3dadd(195240.000000,184476.000000,113300.000000,904.141390)}
{pt3dadd(197160.000000,182112.000000,113300.000000,973.566812)}
{pt3dadd(195240.000000,183720.000000,113300.000000,961.146598)}
{pt3dadd(194520.000000,183492.000000,113300.000000,984.832298)}
{pt3dadd(194124.000000,182784.000000,113300.000000,767.297832)}
{pt3dadd(194316.000000,181788.000000,113300.000000,620.536162)}
{pt3dadd(194784.000000,181140.000000,113300.000000,579.952666)}
{pt3dadd(195204.000000,180132.000000,113300.000000,574.182540)}
{pt3dadd(195804.000000,179232.000000,113300.000000,871.440300)}
{pt3dadd(197712.000000,178200.000000,113300.000000,807.210716)}
{pt3dadd(197148.000000,182052.000000,113575.000000,851.766146)}
{pt3dadd(197640.000000,177588.000000,113575.000000,851.766146)}
{pt3dadd(198732.000000,177960.000000,113575.000000,810.753076)}
{pt3dadd(199836.000000,178380.000000,113575.000000,479.591472)}
{pt3dadd(200712.000000,179448.000000,113575.000000,536.456742)}
{pt3dadd(200436.000000,180168.000000,113575.000000,515.996136)}
{pt3dadd(200376.000000,181152.000000,113575.000000,477.507480)}
{pt3dadd(200172.000000,182076.000000,113575.000000,498.059944)}
{pt3dadd(199464.000000,182748.000000,113575.000000,480.385308)}
{pt3dadd(198828.000000,183600.000000,113575.000000,448.501688)}
{pt3dadd(197988.000000,184512.000000,113575.000000,389.342308)}
{pt3dadd(197232.000000,185364.000000,113575.000000,352.360938)}
{pt3dadd(195660.000000,186372.000000,113575.000000,367.326184)}
{pt3dadd(195348.000000,185376.000000,113575.000000,716.162424)}
{pt3dadd(195384.000000,184764.000000,113575.000000,716.162424)}
{pt3dadd(197100.000000,182112.000000,113575.000000,747.853306)}
{pt3dadd(195264.000000,184344.000000,113575.000000,839.036836)}
{pt3dadd(194412.000000,183420.000000,113575.000000,876.415816)}
{pt3dadd(194076.000000,182616.000000,113575.000000,592.851336)}
{pt3dadd(194280.000000,182136.000000,113575.000000,592.851336)}
{pt3dadd(194400.000000,181332.000000,113575.000000,620.319834)}
{pt3dadd(194820.000000,180612.000000,113575.000000,575.764404)}
{pt3dadd(195348.000000,179640.000000,113575.000000,819.272424)}
{pt3dadd(197160.000000,177648.000000,113575.000000,762.407154)}
{pt3dadd(197052.000000,181920.000000,113875.000000,794.290774)}
{pt3dadd(197832.000000,177624.000000,113875.000000,846.635000)}
{pt3dadd(199656.000000,178728.000000,113875.000000,909.380770)}
{pt3dadd(200160.000000,179256.000000,113875.000000,658.859122)}
{pt3dadd(200532.000000,180588.000000,113875.000000,646.547184)}
{pt3dadd(200268.000000,181728.000000,113875.000000,589.681914)}
{pt3dadd(199908.000000,182628.000000,113875.000000,532.816644)}
{pt3dadd(198816.000000,183696.000000,113875.000000,489.644654)}
{pt3dadd(197940.000000,184632.000000,113875.000000,388.822400)}
{pt3dadd(196896.000000,185628.000000,113875.000000,444.306328)}
{pt3dadd(195732.000000,186036.000000,113875.000000,481.116746)}
{pt3dadd(196092.000000,184980.000000,113875.000000,781.490036)}
{pt3dadd(195588.000000,184536.000000,113875.000000,845.719620)}
{pt3dadd(197196.000000,182460.000000,113875.000000,933.500650)}
{pt3dadd(195108.000000,183996.000000,113875.000000,915.310310)}
{pt3dadd(194580.000000,183324.000000,113875.000000,928.351534)}
{pt3dadd(194232.000000,182640.000000,113875.000000,684.843514)}
{pt3dadd(194184.000000,181332.000000,113875.000000,663.785920)}
{pt3dadd(194664.000000,180192.000000,113875.000000,707.056772)}
{pt3dadd(195168.000000,179160.000000,113875.000000,701.561412)}
{pt3dadd(195984.000000,178452.000000,113875.000000,992.139520)}
{pt3dadd(197760.000000,177840.000000,113875.000000,944.542396)}
{pt3dadd(197136.000000,182304.000000,114175.000000,926.352056)}
{pt3dadd(197928.000000,177612.000000,114175.000000,984.339136)}
{pt3dadd(198972.000000,178008.000000,114175.000000,1029.082430)}
{pt3dadd(199476.000000,179292.000000,114175.000000,665.705226)}
{pt3dadd(200244.000000,179940.000000,114175.000000,660.958124)}
{pt3dadd(200676.000000,181392.000000,114175.000000,616.402694)}
{pt3dadd(200508.000000,182136.000000,114175.000000,458.760564)}
{pt3dadd(199776.000000,182976.000000,114175.000000,390.225218)}
{pt3dadd(198852.000000,184044.000000,114175.000000,381.037858)}
{pt3dadd(197988.000000,185004.000000,114175.000000,338.963104)}
{pt3dadd(196680.000000,185676.000000,114175.000000,332.376404)}
{pt3dadd(195984.000000,185640.000000,114175.000000,671.863234)}
{pt3dadd(195456.000000,184536.000000,114175.000000,706.920772)}
{pt3dadd(197112.000000,182748.000000,114175.000000,709.835076)}
{pt3dadd(195348.000000,183780.000000,114175.000000,738.982296)}
{pt3dadd(194292.000000,183528.000000,114175.000000,742.195322)}
{pt3dadd(193908.000000,182652.000000,114175.000000,426.803316)}
{pt3dadd(193536.000000,181464.000000,114175.000000,421.033190)}
{pt3dadd(193920.000000,180792.000000,114175.000000,522.215810)}
{pt3dadd(194184.000000,180024.000000,114175.000000,657.810190)}
{pt3dadd(195120.000000,179256.000000,114175.000000,717.568062)}
{pt3dadd(196164.000000,178752.000000,114175.000000,1097.638928)}
{pt3dadd(198012.000000,177756.000000,114175.000000,1115.829268)}
{pt3dadd(197076.000000,181944.000000,114600.000000,1035.460668)}
{pt3dadd(197856.000000,177540.000000,114600.000000,1046.341128)}
{pt3dadd(199128.000000,177768.000000,114600.000000,1107.088460)}
{pt3dadd(199488.000000,178860.000000,114600.000000,802.577820)}
{pt3dadd(200460.000000,179868.000000,114600.000000,866.362514)}
{pt3dadd(200472.000000,180360.000000,114600.000000,924.620646)}
{pt3dadd(200136.000000,181200.000000,114600.000000,800.804906)}
{pt3dadd(200328.000000,181980.000000,114600.000000,703.247156)}
{pt3dadd(200124.000000,182748.000000,114600.000000,600.218432)}
{pt3dadd(199740.000000,183420.000000,114600.000000,488.955986)}
{pt3dadd(199260.000000,184116.000000,114600.000000,423.072924)}
{pt3dadd(198348.000000,185052.000000,114600.000000,389.246534)}
{pt3dadd(197292.000000,185316.000000,114600.000000,340.248442)}
{pt3dadd(196356.000000,185352.000000,114600.000000,320.727086)}
{pt3dadd(195588.000000,184812.000000,114600.000000,687.005118)}
{pt3dadd(195060.000000,184380.000000,114600.000000,676.876058)}
{pt3dadd(197052.000000,182280.000000,114600.000000,630.247958)}
{pt3dadd(194760.000000,183780.000000,114600.000000,624.607714)}
{pt3dadd(193788.000000,183408.000000,114600.000000,654.764586)}
{pt3dadd(193596.000000,182892.000000,114600.000000,312.278606)}
{pt3dadd(193368.000000,182148.000000,114600.000000,363.420736)}
{pt3dadd(193608.000000,181752.000000,114600.000000,486.487886)}
{pt3dadd(193692.000000,181056.000000,114600.000000,621.207492)}
{pt3dadd(194088.000000,180444.000000,114600.000000,760.707320)}
{pt3dadd(194568.000000,179784.000000,114600.000000,858.046600)}
{pt3dadd(195312.000000,179100.000000,114600.000000,1217.656860)}
{pt3dadd(197076.000000,178236.000000,114600.000000,1160.791590)}
{pt3dadd(197052.000000,182088.000000,114850.000000,1076.404558)}
{pt3dadd(197556.000000,177312.000000,114850.000000,1037.823046)}
{pt3dadd(199368.000000,177732.000000,114850.000000,992.959586)}
{pt3dadd(199728.000000,178692.000000,114850.000000,672.597260)}
{pt3dadd(200208.000000,179184.000000,114850.000000,770.155010)}
{pt3dadd(200568.000000,179844.000000,114850.000000,863.067150)}
{pt3dadd(200064.000000,180636.000000,114850.000000,788.713382)}
{pt3dadd(200052.000000,181812.000000,114850.000000,726.019418)}
{pt3dadd(199692.000000,183336.000000,114850.000000,671.057980)}
{pt3dadd(198948.000000,184440.000000,114850.000000,578.021274)}
{pt3dadd(197880.000000,184944.000000,114850.000000,809.327946)}
{pt3dadd(196524.000000,185184.000000,114850.000000,779.043916)}
{pt3dadd(196752.000000,182496.000000,114850.000000,819.627412)}
{pt3dadd(195828.000000,184728.000000,114850.000000,801.952776)}
{pt3dadd(195324.000000,183804.000000,114850.000000,840.603722)}
{pt3dadd(194604.000000,183432.000000,114850.000000,563.862662)}
{pt3dadd(193668.000000,181920.000000,114850.000000,644.123666)}
{pt3dadd(193812.000000,181248.000000,114850.000000,666.234134)}
{pt3dadd(194052.000000,180432.000000,114850.000000,731.505894)}
{pt3dadd(194400.000000,179724.000000,114850.000000,768.415174)}
{pt3dadd(194724.000000,179076.000000,114850.000000,768.415174)}
{pt3dadd(195240.000000,178584.000000,114850.000000,734.937366)}
{pt3dadd(196140.000000,178056.000000,114850.000000,1024.947526)}
{pt3dadd(197424.000000,177528.000000,114850.000000,982.334866)}
{pt3dadd(197304.000000,182160.000000,115100.000000,982.334866)}
{pt3dadd(197616.000000,177528.000000,115100.000000,1019.244146)}
{pt3dadd(198792.000000,177972.000000,115100.000000,1077.098748)}
{pt3dadd(199656.000000,178680.000000,115100.000000,779.356062)}
{pt3dadd(200328.000000,179748.000000,115100.000000,790.085102)}
{pt3dadd(200172.000000,180360.000000,115100.000000,766.869102)}
{pt3dadd(200424.000000,181368.000000,115100.000000,696.055978)}
{pt3dadd(200040.000000,182076.000000,115100.000000,616.717746)}
{pt3dadd(200076.000000,183132.000000,115100.000000,510.019352)}
{pt3dadd(199692.000000,183648.000000,115100.000000,489.558746)}
{pt3dadd(199392.000000,184524.000000,115100.000000,428.387714)}
{pt3dadd(198768.000000,184908.000000,115100.000000,406.807630)}
{pt3dadd(198036.000000,185004.000000,115100.000000,389.132994)}
{pt3dadd(197232.000000,185136.000000,115100.000000,384.674854)}
{pt3dadd(196344.000000,185160.000000,115100.000000,350.933300)}
{pt3dadd(195660.000000,184920.000000,115100.000000,317.685352)}
{pt3dadd(195672.000000,184740.000000,115100.000000,313.965870)}
{pt3dadd(195264.000000,184248.000000,115100.000000,684.344630)}
{pt3dadd(194856.000000,183828.000000,115100.000000,745.524190)}
{pt3dadd(197304.000000,182388.000000,115100.000000,734.673500)}
{pt3dadd(194724.000000,183552.000000,115100.000000,791.713500)}
{pt3dadd(194112.000000,183144.000000,115100.000000,838.496696)}
{pt3dadd(193788.000000,182268.000000,115100.000000,490.777036)}
{pt3dadd(193728.000000,181212.000000,115100.000000,556.605696)}
{pt3dadd(193680.000000,180384.000000,115100.000000,694.234646)}
{pt3dadd(194364.000000,179856.000000,115100.000000,731.613626)}
{pt3dadd(194988.000000,179184.000000,115100.000000,757.727120)}
{pt3dadd(195468.000000,178200.000000,115100.000000,800.339780)}
{pt3dadd(196788.000000,177840.000000,115100.000000,1060.688260)}
{pt3dadd(197400.000000,177720.000000,115100.000000,947.099090)}
{pt3dadd(196872.000000,182064.000000,115400.000000,933.405810)}
{pt3dadd(197664.000000,177180.000000,115400.000000,1050.624510)}
{pt3dadd(198720.000000,177756.000000,115400.000000,1120.947130)}
{pt3dadd(199032.000000,178800.000000,115400.000000,837.382650)}
{pt3dadd(199404.000000,178812.000000,115400.000000,884.165846)}
{pt3dadd(200160.000000,179808.000000,115400.000000,865.975506)}
{pt3dadd(200280.000000,180600.000000,115400.000000,748.756806)}
{pt3dadd(200160.000000,181260.000000,115400.000000,626.089960)}
{pt3dadd(199896.000000,181896.000000,115400.000000,612.396680)}
{pt3dadd(200076.000000,182856.000000,115400.000000,638.510174)}
{pt3dadd(199692.000000,183396.000000,115400.000000,633.014814)}
{pt3dadd(199260.000000,184008.000000,115400.000000,549.989064)}
{pt3dadd(198924.000000,184872.000000,115400.000000,529.436600)}
{pt3dadd(197856.000000,185040.000000,115400.000000,415.768742)}
{pt3dadd(196824.000000,185148.000000,115400.000000,659.276762)}
{pt3dadd(195540.000000,184944.000000,115400.000000,682.962462)}
{pt3dadd(197076.000000,182544.000000,115400.000000,723.375552)}
{pt3dadd(195552.000000,183744.000000,115400.000000,739.406972)}
{pt3dadd(194940.000000,183408.000000,115400.000000,834.884490)}
{pt3dadd(194316.000000,182736.000000,115400.000000,571.321618)}
{pt3dadd(193596.000000,181680.000000,115400.000000,558.901404)}
{pt3dadd(193752.000000,180936.000000,115400.000000,651.605478)}
{pt3dadd(193872.000000,180180.000000,115400.000000,758.562162)}
{pt3dadd(194556.000000,179592.000000,115400.000000,790.445782)}
{pt3dadd(195204.000000,178884.000000,115400.000000,1073.548414)}
{pt3dadd(197172.000000,177576.000000,115400.000000,1038.490876)}
{pt3dadd(197052.000000,182328.000000,115800.000000,1003.496302)}
{pt3dadd(197616.000000,177204.000000,115800.000000,933.350036)}
{pt3dadd(198432.000000,177852.000000,115800.000000,942.669136)}
{pt3dadd(199392.000000,177960.000000,115800.000000,659.566504)}
{pt3dadd(199644.000000,178656.000000,115800.000000,647.840846)}
{pt3dadd(200016.000000,179172.000000,115800.000000,600.860386)}
{pt3dadd(200508.000000,179892.000000,115800.000000,568.571012)}
{pt3dadd(200196.000000,180444.000000,115800.000000,502.386642)}
{pt3dadd(200184.000000,181104.000000,115800.000000,474.844370)}
{pt3dadd(200196.000000,181884.000000,115800.000000,510.362080)}
{pt3dadd(199896.000000,182568.000000,115800.000000,504.866720)}
{pt3dadd(199704.000000,183156.000000,115800.000000,509.613822)}
{pt3dadd(199524.000000,183672.000000,115800.000000,552.785812)}
{pt3dadd(199440.000000,184308.000000,115800.000000,508.607320)}
{pt3dadd(198960.000000,184668.000000,115800.000000,456.986216)}
{pt3dadd(198228.000000,185124.000000,115800.000000,408.279416)}
{pt3dadd(197376.000000,185148.000000,115800.000000,435.821688)}
{pt3dadd(196704.000000,185136.000000,115800.000000,674.413748)}
{pt3dadd(195840.000000,184524.000000,115800.000000,746.134512)}
{pt3dadd(196800.000000,182724.000000,115800.000000,835.134596)}
{pt3dadd(195336.000000,183648.000000,115800.000000,907.527096)}
{pt3dadd(194856.000000,182832.000000,115800.000000,959.323056)}
{pt3dadd(194112.000000,182088.000000,115800.000000,749.521116)}
{pt3dadd(194016.000000,181296.000000,115800.000000,776.940282)}
{pt3dadd(193896.000000,180768.000000,115800.000000,784.304596)}
{pt3dadd(194112.000000,179928.000000,115800.000000,838.690356)}
{pt3dadd(194352.000000,179436.000000,115800.000000,799.935620)}
{pt3dadd(195180.000000,178848.000000,115800.000000,764.783928)}
{pt3dadd(195720.000000,178056.000000,115800.000000,1040.984094)}
{pt3dadd(197424.000000,177492.000000,115800.000000,947.534000)}
{pt3dadd(196980.000000,181860.000000,116150.000000,845.670488)}
{pt3dadd(197532.000000,177144.000000,116150.000000,875.900116)}
{pt3dadd(199044.000000,177636.000000,116150.000000,946.046382)}
{pt3dadd(199488.000000,178644.000000,116150.000000,648.788622)}
{pt3dadd(199332.000000,178800.000000,116150.000000,702.990782)}
{pt3dadd(200028.000000,179964.000000,116150.000000,779.258654)}
{pt3dadd(199860.000000,180900.000000,116150.000000,724.159034)}
{pt3dadd(199500.000000,181500.000000,116150.000000,626.470496)}
{pt3dadd(199644.000000,182184.000000,116150.000000,587.819550)}
{pt3dadd(199488.000000,183120.000000,116150.000000,627.067484)}
{pt3dadd(199224.000000,183852.000000,116150.000000,525.884864)}
{pt3dadd(198588.000000,184548.000000,116150.000000,537.713632)}
{pt3dadd(197928.000000,185076.000000,116150.000000,502.285006)}
{pt3dadd(196764.000000,184776.000000,116150.000000,838.193712)}
{pt3dadd(195864.000000,184956.000000,116150.000000,751.016674)}
{pt3dadd(196908.000000,182196.000000,116150.000000,748.102370)}
{pt3dadd(195624.000000,184692.000000,116150.000000,679.157138)}
{pt3dadd(195072.000000,184140.000000,116150.000000,730.299268)}
{pt3dadd(194580.000000,183504.000000,116150.000000,439.721160)}
{pt3dadd(194160.000000,182280.000000,116150.000000,542.749884)}
{pt3dadd(193812.000000,181416.000000,116150.000000,672.442448)}
{pt3dadd(194028.000000,180720.000000,116150.000000,713.845408)}
{pt3dadd(194304.000000,180048.000000,116150.000000,768.945028)}
{pt3dadd(194448.000000,179148.000000,116150.000000,762.265376)}
{pt3dadd(195288.000000,178740.000000,116150.000000,963.948156)}
{pt3dadd(196848.000000,177660.000000,116150.000000,866.390406)}
{pt3dadd(196764.000000,181932.000000,116450.000000,900.294250)}
{pt3dadd(197424.000000,177360.000000,116450.000000,927.169664)}
{pt3dadd(198600.000000,177972.000000,116450.000000,964.078944)}
{pt3dadd(199188.000000,179280.000000,116450.000000,789.271578)}
{pt3dadd(199500.000000,179472.000000,116450.000000,839.123220)}
{pt3dadd(199632.000000,180360.000000,116450.000000,902.907914)}
{pt3dadd(199668.000000,180612.000000,116450.000000,884.557608)}
{pt3dadd(199428.000000,181308.000000,116450.000000,854.327980)}
{pt3dadd(199032.000000,182028.000000,116450.000000,811.600880)}
{pt3dadd(199212.000000,182844.000000,116450.000000,811.600880)}
{pt3dadd(198924.000000,183636.000000,116450.000000,678.483716)}
{pt3dadd(198684.000000,184380.000000,116450.000000,614.858988)}
{pt3dadd(198048.000000,185052.000000,116450.000000,548.975926)}
{pt3dadd(196956.000000,184728.000000,116450.000000,700.522912)}
{pt3dadd(195912.000000,184620.000000,116450.000000,687.481688)}
{pt3dadd(196404.000000,182496.000000,116450.000000,713.642168)}
{pt3dadd(195600.000000,183864.000000,116450.000000,719.412294)}
{pt3dadd(194832.000000,183216.000000,116450.000000,799.673298)}
{pt3dadd(194268.000000,182136.000000,116450.000000,620.707146)}
{pt3dadd(193932.000000,181116.000000,116450.000000,633.748370)}
{pt3dadd(193932.000000,180456.000000,116450.000000,670.558788)}
{pt3dadd(194160.000000,179688.000000,116450.000000,711.769122)}
{pt3dadd(194616.000000,179124.000000,116450.000000,690.711528)}
{pt3dadd(195444.000000,178488.000000,116450.000000,901.062940)}
{pt3dadd(197244.000000,177672.000000,116450.000000,835.179878)}
{pt3dadd(196656.000000,182052.000000,116725.000000,794.063698)}
{pt3dadd(197736.000000,177444.000000,116725.000000,860.169938)}
{pt3dadd(198924.000000,177804.000000,116725.000000,881.227532)}
{pt3dadd(198864.000000,179640.000000,116725.000000,698.295286)}
{pt3dadd(199440.000000,179796.000000,116725.000000,751.137124)}
{pt3dadd(199548.000000,180828.000000,116725.000000,774.929176)}
{pt3dadd(199416.000000,181812.000000,116725.000000,646.128972)}
{pt3dadd(199236.000000,182520.000000,116725.000000,606.881038)}
{pt3dadd(198984.000000,183192.000000,116725.000000,622.732724)}
{pt3dadd(198672.000000,184020.000000,116725.000000,533.073102)}
{pt3dadd(198132.000000,184488.000000,116725.000000,484.366302)}
{pt3dadd(198240.000000,185220.000000,116725.000000,462.786218)}
{pt3dadd(197076.000000,185040.000000,116725.000000,405.669754)}
{pt3dadd(196380.000000,184524.000000,116725.000000,541.365054)}
{pt3dadd(195684.000000,184212.000000,116725.000000,624.966034)}
{pt3dadd(196332.000000,182052.000000,116725.000000,704.038186)}
{pt3dadd(195144.000000,183204.000000,116725.000000,823.306808)}
{pt3dadd(194676.000000,182532.000000,116725.000000,905.293264)}
{pt3dadd(194496.000000,181488.000000,116725.000000,769.597964)}
{pt3dadd(194100.000000,180660.000000,116725.000000,788.697830)}
{pt3dadd(194352.000000,180216.000000,116725.000000,775.656606)}
{pt3dadd(194388.000000,179604.000000,116725.000000,748.781192)}
{pt3dadd(195048.000000,178776.000000,116725.000000,723.911200)}
{pt3dadd(196296.000000,178368.000000,116725.000000,845.025660)}
{pt3dadd(197508.000000,177792.000000,116725.000000,765.953508)}
{pt3dadd(196644.000000,181584.000000,117000.000000,772.315080)}
{pt3dadd(197556.000000,177408.000000,117000.000000,819.421700)}
{pt3dadd(198720.000000,178392.000000,117000.000000,819.421700)}
{pt3dadd(198960.000000,179508.000000,117000.000000,668.077612)}
{pt3dadd(199584.000000,180072.000000,117000.000000,716.784412)}
{pt3dadd(199452.000000,180792.000000,117000.000000,682.880568)}
{pt3dadd(199428.000000,181452.000000,117000.000000,569.945288)}
{pt3dadd(199344.000000,182136.000000,117000.000000,559.216248)}
{pt3dadd(198996.000000,182652.000000,117000.000000,589.445876)}
{pt3dadd(198648.000000,183204.000000,117000.000000,540.739076)}
{pt3dadd(198204.000000,183840.000000,117000.000000,545.723540)}
{pt3dadd(197892.000000,185160.000000,117000.000000,511.897150)}
{pt3dadd(196872.000000,184428.000000,117000.000000,684.953750)}
{pt3dadd(195888.000000,183948.000000,117000.000000,592.560542)}
{pt3dadd(196200.000000,181692.000000,117000.000000,609.469114)}
{pt3dadd(195204.000000,183588.000000,117000.000000,675.297774)}
{pt3dadd(194424.000000,182676.000000,117000.000000,751.736824)}
{pt3dadd(194640.000000,181908.000000,117000.000000,653.033992)}
{pt3dadd(194316.000000,180948.000000,117000.000000,772.302614)}
{pt3dadd(194652.000000,180384.000000,117000.000000,834.466194)}
{pt3dadd(194928.000000,179712.000000,117000.000000,773.871214)}
{pt3dadd(195204.000000,178716.000000,117000.000000,918.201674)}
{pt3dadd(197268.000000,177648.000000,117000.000000,797.460482)}
{pt3dadd(197028.000000,181260.000000,117275.000000,715.485448)}
{pt3dadd(197436.000000,177552.000000,117275.000000,745.715076)}
{pt3dadd(198672.000000,178392.000000,117275.000000,763.039204)}
{pt3dadd(198912.000000,179160.000000,117275.000000,557.537712)}
{pt3dadd(199488.000000,180156.000000,117275.000000,585.366764)}
{pt3dadd(199392.000000,181620.000000,117275.000000,574.637724)}
{pt3dadd(198852.000000,182352.000000,117275.000000,611.382024)}
{pt3dadd(198528.000000,183132.000000,117275.000000,545.351096)}
{pt3dadd(198108.000000,184008.000000,117275.000000,545.351096)}
{pt3dadd(197460.000000,185124.000000,117275.000000,541.250368)}
{pt3dadd(196620.000000,183948.000000,117275.000000,758.084208)}
{pt3dadd(195948.000000,183696.000000,117275.000000,641.258638)}
{pt3dadd(197088.000000,181764.000000,117275.000000,662.072658)}
{pt3dadd(195732.000000,183408.000000,117275.000000,716.230062)}
{pt3dadd(194964.000000,183276.000000,117275.000000,796.598662)}
{pt3dadd(194856.000000,182292.000000,117275.000000,615.363854)}
{pt3dadd(194868.000000,181368.000000,117275.000000,703.970232)}
{pt3dadd(194448.000000,180888.000000,117275.000000,769.241992)}
{pt3dadd(194712.000000,180120.000000,117275.000000,776.255620)}
{pt3dadd(194688.000000,179424.000000,117275.000000,761.158780)}
{pt3dadd(195204.000000,178944.000000,117275.000000,885.391108)}
{pt3dadd(197040.000000,177960.000000,117275.000000,788.378240)}
{pt3dadd(197124.000000,181248.000000,117600.000000,711.939190)}
{pt3dadd(197592.000000,178116.000000,117600.000000,646.667430)}
{pt3dadd(198516.000000,178092.000000,117600.000000,639.653802)}
{pt3dadd(199392.000000,179436.000000,117600.000000,465.569832)}
{pt3dadd(199308.000000,180228.000000,117600.000000,523.827964)}
{pt3dadd(199200.000000,181284.000000,117600.000000,552.669890)}
{pt3dadd(198588.000000,181860.000000,117600.000000,610.928022)}
{pt3dadd(198516.000000,182640.000000,117600.000000,565.597424)}
{pt3dadd(197976.000000,184056.000000,117600.000000,549.566004)}
{pt3dadd(197568.000000,185016.000000,117600.000000,445.076026)}
{pt3dadd(197124.000000,184452.000000,117600.000000,609.891850)}
{pt3dadd(196272.000000,183828.000000,117600.000000,544.008788)}
{pt3dadd(197220.000000,181680.000000,117600.000000,535.181982)}
{pt3dadd(196188.000000,183216.000000,117600.000000,576.195052)}
{pt3dadd(195492.000000,182964.000000,117600.000000,618.521450)}
{pt3dadd(194664.000000,182040.000000,117600.000000,469.419130)}
{pt3dadd(194436.000000,181140.000000,117600.000000,549.680134)}
{pt3dadd(194688.000000,180492.000000,117600.000000,642.592274)}
{pt3dadd(195276.000000,179916.000000,117600.000000,674.475894)}
{pt3dadd(195996.000000,179160.000000,117600.000000,824.856182)}
{pt3dadd(197592.000000,178164.000000,117600.000000,819.360822)}
{pt3dadd(197340.000000,181356.000000,117925.000000,764.399384)}
{pt3dadd(197628.000000,178860.000000,117925.000000,695.279296)}
{pt3dadd(198552.000000,178824.000000,117925.000000,652.666636)}
{pt3dadd(198900.000000,179808.000000,117925.000000,534.084576)}
{pt3dadd(199128.000000,180696.000000,117925.000000,510.292524)}
{pt3dadd(198732.000000,181512.000000,117925.000000,526.006028)}
{pt3dadd(198744.000000,182652.000000,117925.000000,486.945958)}
{pt3dadd(198312.000000,183612.000000,117925.000000,430.224538)}
{pt3dadd(198372.000000,184512.000000,117925.000000,398.426310)}
{pt3dadd(198084.000000,185280.000000,117925.000000,386.700652)}
{pt3dadd(197580.000000,184944.000000,117925.000000,335.558522)}
{pt3dadd(197232.000000,184500.000000,117925.000000,482.320192)}
{pt3dadd(196584.000000,183684.000000,117925.000000,549.770652)}
{pt3dadd(197196.000000,181644.000000,117925.000000,546.051170)}
{pt3dadd(196332.000000,182988.000000,117925.000000,535.922110)}
{pt3dadd(195660.000000,182988.000000,117925.000000,542.508810)}
{pt3dadd(195060.000000,182016.000000,117925.000000,415.320920)}
{pt3dadd(194844.000000,181068.000000,117925.000000,421.091046)}
{pt3dadd(195108.000000,180552.000000,117925.000000,456.608756)}
{pt3dadd(195720.000000,179916.000000,117925.000000,554.731346)}
{pt3dadd(196944.000000,178932.000000,117925.000000,539.394780)}
{pt3dadd(197532.000000,181920.000000,118225.000000,527.082842)}
{pt3dadd(197988.000000,179208.000000,118225.000000,505.599212)}
{pt3dadd(199128.000000,180096.000000,118225.000000,505.599212)}
{pt3dadd(198684.000000,181116.000000,118225.000000,407.476622)}
{pt3dadd(198720.000000,182196.000000,118225.000000,438.081206)}
{pt3dadd(198756.000000,183000.000000,118225.000000,424.232664)}
{pt3dadd(198516.000000,183804.000000,118225.000000,392.017064)}
{pt3dadd(198588.000000,184764.000000,118225.000000,356.499354)}
{pt3dadd(198156.000000,185268.000000,118225.000000,356.499354)}
{pt3dadd(197748.000000,184692.000000,118225.000000,301.294530)}
{pt3dadd(197316.000000,184596.000000,118225.000000,311.423590)}
{pt3dadd(196716.000000,183996.000000,118225.000000,377.543034)}
{pt3dadd(196236.000000,183228.000000,118225.000000,491.132204)}
{pt3dadd(197856.000000,182820.000000,118225.000000,470.365734)}
{pt3dadd(196764.000000,182280.000000,118225.000000,478.905708)}
{pt3dadd(195204.000000,181656.000000,118225.000000,478.905708)}
{pt3dadd(195156.000000,181080.000000,118225.000000,406.513208)}
{pt3dadd(195864.000000,180600.000000,118225.000000,328.441748)}
{pt3dadd(197196.000000,179292.000000,118225.000000,366.962208)}
{pt3dadd(197640.000000,181776.000000,118525.000000,409.526330)}
{pt3dadd(197628.000000,179460.000000,118525.000000,445.044040)}
{pt3dadd(198564.000000,179952.000000,118525.000000,465.858060)}
{pt3dadd(198288.000000,181068.000000,118525.000000,420.211290)}
{pt3dadd(198372.000000,181620.000000,118525.000000,388.546580)}
{pt3dadd(198420.000000,182580.000000,118525.000000,340.610800)}
{pt3dadd(198600.000000,183444.000000,118525.000000,272.126418)}
{pt3dadd(198360.000000,184488.000000,118525.000000,260.959128)}
{pt3dadd(197832.000000,184044.000000,118525.000000,271.088188)}
{pt3dadd(197268.000000,183564.000000,118525.000000,325.411998)}
{pt3dadd(196884.000000,183192.000000,118525.000000,424.926258)}
{pt3dadd(196308.000000,182304.000000,118525.000000,498.906000)}
{pt3dadd(196320.000000,181680.000000,118525.000000,616.037530)}
{pt3dadd(196344.000000,181044.000000,118525.000000,668.879368)}
{pt3dadd(196860.000000,180480.000000,118525.000000,659.147802)}
{pt3dadd(197100.000000,179748.000000,118525.000000,620.496856)}
{pt3dadd(197400.000000,181344.000000,118750.000000,533.130862)}
{pt3dadd(197652.000000,179916.000000,118750.000000,409.412632)}
{pt3dadd(198312.000000,179148.000000,118750.000000,360.290276)}
{pt3dadd(198576.000000,180408.000000,118750.000000,315.698032)}
{pt3dadd(197856.000000,181824.000000,118750.000000,285.016508)}
{pt3dadd(197892.000000,183132.000000,118750.000000,327.827072)}
{pt3dadd(197316.000000,183384.000000,118750.000000,316.433842)}
{pt3dadd(197016.000000,182940.000000,118750.000000,291.192070)}
{pt3dadd(196320.000000,182412.000000,118750.000000,284.336320)}
{pt3dadd(195984.000000,181668.000000,118750.000000,324.749410)}
{pt3dadd(196116.000000,181224.000000,118750.000000,353.591336)}
{pt3dadd(196272.000000,180276.000000,118750.000000,364.984566)}
{pt3dadd(197004.000000,179700.000000,118750.000000,362.467076)}
{pt3dadd(197340.000000,181416.000000,118975.000000,351.428960)}
{pt3dadd(197256.000000,179496.000000,118975.000000,276.193840)}
{pt3dadd(198168.000000,180012.000000,118975.000000,210.583424)}
{pt3dadd(197844.000000,181848.000000,118975.000000,164.395587)}
{pt3dadd(197712.000000,182772.000000,118975.000000,144.956201)}
{pt3dadd(197496.000000,183492.000000,118975.000000,170.786453)}
{pt3dadd(197076.000000,183012.000000,118975.000000,189.300153)}
{pt3dadd(196656.000000,182388.000000,118975.000000,265.128713)}
{pt3dadd(196200.000000,181248.000000,118975.000000,333.171268)}
{pt3dadd(196536.000000,180624.000000,118975.000000,369.734400)}
{pt3dadd(196752.000000,179664.000000,118975.000000,366.958868)}
{pt3dadd(196572.000000,180912.000000,119225.000000,366.958868)}
{pt3dadd(196596.000000,179412.000000,119225.000000,318.252068)}
{pt3dadd(196968.000000,179832.000000,119225.000000,257.566904)}
{pt3dadd(197040.000000,181188.000000,119225.000000,218.130014)}
{pt3dadd(196872.000000,182424.000000,119225.000000,188.049434)}
{pt3dadd(196416.000000,182460.000000,119225.000000,192.964534)}
{pt3dadd(195792.000000,182280.000000,119225.000000,202.611264)}
{pt3dadd(195864.000000,181284.000000,119225.000000,200.247019)}
{pt3dadd(196236.000000,179832.000000,119225.000000,204.666297)}
{pt3dadd(196452.000000,180840.000000,119475.000000,218.686611)}
{pt3dadd(196728.000000,180312.000000,119475.000000,190.038441)}
{pt3dadd(196704.000000,181152.000000,119475.000000,142.257050)}
{pt3dadd(196296.000000,181884.000000,119475.000000,150.101635)}
{pt3dadd(195900.000000,181560.000000,119475.000000,157.096089)}
{pt3dadd(195960.000000,180432.000000,119475.000000,147.084191)}
{pt3dadd(196128.000000,179844.000000,119475.000000,166.332103)}
{pt3dadd(196332.000000,180660.000000,119475.000000,147.192400)}

{create adhoc66}
{access adhoc66}
{connect adhoc66(1), adhoc3(0)}
{nseg = 1}
{strdef color color = "White"}
{pt3dclear()}
{pt3dadd(185472.000000,207048.000000,89275.000000,69.007660)}
{pt3dadd(185028.000000,206652.000000,85450.000000,27.732632)}

{create adhoc67}
{access adhoc67}
{connect adhoc67(1), adhoc66(0)}
{nseg = 1}
{strdef color color = "White"}
{pt3dclear()}
{pt3dadd(185028.000000,206652.000000,85450.000000,27.732632)}
{pt3dadd(185196.000000,206220.000000,85075.000000,14.202260)}
{pt3dadd(184740.000000,205692.000000,84625.000000,9.121356)}
{pt3dadd(184632.000000,205440.000000,84425.000000,6.249659)}
{pt3dadd(184464.000000,204816.000000,83900.000000,3.874829)}
{pt3dadd(184188.000000,204312.000000,83475.000000,3.874829)}
{pt3dadd(183948.000000,203772.000000,83000.000000,8.196935)}
{pt3dadd(184512.000000,203100.000000,82425.000000,11.748689)}
{pt3dadd(184800.000000,202152.000000,81800.000000,14.623100)}
{pt3dadd(184788.000000,201480.000000,81200.000000,19.258772)}

{create adhoc68}
{access adhoc68}
{connect adhoc68(1), adhoc67(0)}
{nseg = 1}
{strdef color color = "White"}
{pt3dclear()}
{pt3dadd(184788.000000,201480.000000,81200.000000,19.258772)}
{pt3dadd(184896.000000,199860.000000,80425.000000,9.499480)}
{pt3dadd(185304.000000,198960.000000,80150.000000,6.299688)}
{pt3dadd(185556.000000,198456.000000,79900.000000,7.070039)}
{pt3dadd(185328.000000,197916.000000,79325.000000,5.822105)}
{pt3dadd(185184.000000,197364.000000,78575.000000,5.822105)}
{pt3dadd(184932.000000,197136.000000,78000.000000,5.822105)}
{pt3dadd(185064.000000,196848.000000,77575.000000,13.189623)}
{pt3dadd(185016.000000,196716.000000,76950.000000,8.867518)}
{pt3dadd(184860.000000,196476.000000,76225.000000,8.867518)}
{pt3dadd(184872.000000,196644.000000,75550.000000,8.867518)}
{pt3dadd(184920.000000,197040.000000,74925.000000,13.892183)}
{pt3dadd(185064.000000,196848.000000,74050.000000,9.434461)}
{pt3dadd(185184.000000,196068.000000,73175.000000,12.344256)}
{pt3dadd(185208.000000,194868.000000,72450.000000,19.573760)}
{pt3dadd(185004.000000,194544.000000,72525.000000,16.048977)}

{create adhoc69}
{access adhoc69}
{connect adhoc69(1), adhoc68(0)}
{nseg = 1}
{strdef color color = "White"}
{pt3dclear()}
{pt3dadd(185004.000000,194544.000000,72525.000000,16.048977)}
{pt3dadd(185088.000000,194112.000000,72375.000000,10.307708)}
{pt3dadd(184656.000000,193776.000000,73050.000000,6.784625)}
{pt3dadd(184476.000000,193320.000000,73575.000000,4.321325)}
{pt3dadd(184260.000000,193176.000000,73575.000000,2.936441)}
{pt3dadd(184116.000000,193092.000000,73500.000000,3.894068)}
{pt3dadd(184488.000000,192768.000000,73625.000000,6.449724)}

{create adhoc70}
{access adhoc70}
{connect adhoc70(1), adhoc68(0)}
{nseg = 1}
{strdef color color = "White"}
{pt3dclear()}
{pt3dadd(185004.000000,194544.000000,72525.000000,16.048977)}
{pt3dadd(184956.000000,194112.000000,72150.000000,8.945526)}
{pt3dadd(184572.000000,193776.000000,71650.000000,11.893900)}
{pt3dadd(184344.000000,193404.000000,71100.000000,11.377640)}
{pt3dadd(184140.000000,193116.000000,70575.000000,19.258772)}

{create adhoc71}
{access adhoc71}
{connect adhoc71(1), adhoc70(0)}
{nseg = 1}
{strdef color color = "White"}
{pt3dclear()}
{pt3dadd(184140.000000,193116.000000,70575.000000,19.258772)}
{pt3dadd(184188.000000,192396.000000,69900.000000,13.339181)}
{pt3dadd(184080.000000,192036.000000,69625.000000,8.603509)}
{pt3dadd(184056.000000,191832.000000,69350.000000,6.041699)}
{pt3dadd(183660.000000,192156.000000,69300.000000,3.085740)}
{pt3dadd(183564.000000,192144.000000,69250.000000,3.681535)}
{pt3dadd(183384.000000,192264.000000,69075.000000,5.135891)}
{pt3dadd(183264.000000,192276.000000,69000.000000,4.478975)}

{create adhoc72}
{access adhoc72}
{connect adhoc72(1), adhoc70(0)}
{nseg = 1}
{strdef color color = "White"}
{pt3dclear()}
{pt3dadd(184140.000000,193116.000000,70575.000000,19.258772)}
{pt3dadd(182844.000000,193236.000000,70625.000000,6.449724)}

{create adhoc73}
{access adhoc73}
{connect adhoc73(1), adhoc67(0)}
{nseg = 1}
{strdef color color = "White"}
{pt3dclear()}
{pt3dadd(184788.000000,201480.000000,81200.000000,19.258772)}
{pt3dadd(183600.000000,201624.000000,81425.000000,9.069499)}
{pt3dadd(183444.000000,201624.000000,81400.000000,6.041699)}
{pt3dadd(183144.000000,201708.000000,81375.000000,3.085740)}
{pt3dadd(182424.000000,202440.000000,81525.000000,2.095795)}
{pt3dadd(182388.000000,202764.000000,81450.000000,2.095795)}
{pt3dadd(182292.000000,203088.000000,81475.000000,3.343729)}
{pt3dadd(182052.000000,203388.000000,81675.000000,4.118683)}
{pt3dadd(181908.000000,203544.000000,81875.000000,4.871480)}
{pt3dadd(181716.000000,203688.000000,82000.000000,5.374770)}

{create adhoc74}
{access adhoc74}
{connect adhoc74(1), adhoc66(0)}
{nseg = 1}
{strdef color color = "White"}
{pt3dclear()}
{pt3dadd(185028.000000,206652.000000,85450.000000,27.732632)}
{pt3dadd(182724.000000,207912.000000,81700.000000,25.079247)}
{pt3dadd(182520.000000,208080.000000,81050.000000,15.647548)}
{pt3dadd(182424.000000,208140.000000,80325.000000,21.602299)}
{pt3dadd(182028.000000,208416.000000,79550.000000,21.985675)}
{pt3dadd(181548.000000,208632.000000,78750.000000,35.642792)}
{pt3dadd(181284.000000,208764.000000,77975.000000,47.921990)}

{create adhoc75}
{access adhoc75}
{connect adhoc75(1), adhoc74(0)}
{nseg = 1}
{strdef color color = "White"}
{pt3dclear()}
{pt3dadd(181284.000000,208764.000000,77975.000000,47.921990)}
{pt3dadd(180276.000000,206976.000000,77300.000000,19.569864)}
{pt3dadd(180588.000000,206028.000000,77150.000000,12.341918)}
{pt3dadd(180828.000000,205392.000000,77325.000000,3.504016)}
{pt3dadd(180864.000000,205188.000000,77325.000000,1.946496)}
{pt3dadd(181020.000000,205104.000000,77550.000000,1.946496)}
{pt3dadd(181200.000000,204684.000000,78050.000000,1.946496)}
{pt3dadd(181284.000000,204396.000000,78325.000000,2.678452)}
{pt3dadd(181392.000000,204216.000000,78525.000000,3.006910)}
{pt3dadd(181644.000000,203844.000000,78750.000000,4.011517)}
{pt3dadd(181656.000000,203520.000000,78875.000000,5.374770)}

{create adhoc76}
{access adhoc76}
{connect adhoc76(1), adhoc74(0)}
{nseg = 1}
{strdef color color = "White"}
{pt3dclear()}
{pt3dadd(181284.000000,208764.000000,77975.000000,47.921990)}
{pt3dadd(180588.000000,208956.000000,77225.000000,40.378713)}
{pt3dadd(179892.000000,209460.000000,76775.000000,33.279160)}

{create adhoc77}
{access adhoc77}
{connect adhoc77(1), adhoc76(0)}
{nseg = 1}
{strdef color color = "White"}
{pt3dclear()}
{pt3dadd(179892.000000,209460.000000,76775.000000,33.279160)}
{pt3dadd(179172.000000,209904.000000,75975.000000,24.372251)}
{pt3dadd(178440.000000,210348.000000,74875.000000,21.579183)}
{pt3dadd(177696.000000,210288.000000,74125.000000,22.910349)}
{pt3dadd(177468.000000,209844.000000,73425.000000,24.904717)}
{pt3dadd(176976.000000,209736.000000,72600.000000,39.934990)}

{create adhoc78}
{access adhoc78}
{connect adhoc78(1), adhoc77(0)}
{nseg = 1}
{strdef color color = "White"}
{pt3dclear()}
{pt3dadd(176976.000000,209736.000000,72600.000000,39.934990)}
{pt3dadd(176376.000000,209628.000000,71850.000000,19.161322)}
{pt3dadd(175428.000000,209244.000000,71225.000000,12.096793)}
{pt3dadd(174996.000000,208956.000000,70875.000000,8.731901)}
{pt3dadd(173796.000000,208752.000000,70500.000000,5.822105)}
{pt3dadd(173520.000000,208764.000000,70725.000000,5.822105)}
{pt3dadd(172452.000000,208668.000000,71250.000000,5.822105)}
{pt3dadd(172080.000000,208212.000000,71525.000000,8.731901)}
{pt3dadd(171696.000000,207984.000000,71375.000000,4.409795)}
{pt3dadd(171372.000000,207828.000000,71350.000000,4.409795)}
{pt3dadd(171072.000000,207732.000000,71400.000000,4.409795)}
{pt3dadd(170700.000000,207636.000000,71150.000000,7.319591)}
{pt3dadd(170436.000000,207552.000000,71000.000000,4.409795)}
{pt3dadd(170208.000000,207600.000000,70975.000000,4.409795)}
{pt3dadd(169872.000000,207744.000000,70825.000000,4.409795)}
{pt3dadd(169572.000000,207552.000000,70625.000000,6.784625)}
{pt3dadd(169224.000000,207540.000000,70475.000000,3.874829)}
{pt3dadd(168912.000000,207612.000000,70275.000000,3.874829)}
{pt3dadd(168588.000000,207456.000000,70000.000000,3.874829)}
{pt3dadd(168252.000000,207408.000000,69750.000000,8.196935)}
{pt3dadd(167904.000000,207396.000000,69500.000000,5.822105)}
{pt3dadd(167532.000000,207384.000000,69375.000000,5.822105)}
{pt3dadd(167172.000000,207192.000000,69250.000000,5.822105)}
{pt3dadd(166680.000000,207192.000000,69175.000000,9.373860)}
{pt3dadd(166416.000000,207048.000000,68850.000000,5.051754)}
{pt3dadd(166116.000000,206808.000000,68725.000000,5.051754)}
{pt3dadd(165684.000000,206832.000000,68600.000000,5.051754)}
{pt3dadd(165372.000000,206628.000000,68400.000000,8.603509)}
{pt3dadd(165000.000000,206352.000000,68150.000000,5.051754)}
{pt3dadd(164700.000000,206064.000000,67925.000000,5.051754)}
{pt3dadd(164400.000000,205776.000000,67700.000000,5.051754)}
{pt3dadd(164124.000000,205512.000000,67675.000000,9.373860)}
{pt3dadd(163848.000000,205380.000000,67625.000000,5.822105)}
{pt3dadd(163572.000000,205368.000000,67700.000000,5.822105)}
{pt3dadd(163320.000000,205140.000000,67650.000000,5.822105)}
{pt3dadd(161988.000000,204876.000000,67350.000000,9.373860)}
{pt3dadd(161496.000000,203976.000000,66750.000000,8.603509)}
{pt3dadd(160812.000000,202908.000000,66125.000000,12.925614)}
{pt3dadd(160392.000000,202872.000000,65675.000000,20.542690)}
{pt3dadd(160704.000000,202080.000000,65075.000000,23.110527)}

{create adhoc79}
{access adhoc79}
{connect adhoc79(1), adhoc78(0)}
{nseg = 1}
{strdef color color = "White"}
{pt3dclear()}
{pt3dadd(160704.000000,202080.000000,65075.000000,23.110527)}
{pt3dadd(159984.000000,202356.000000,64300.000000,14.623100)}
{pt3dadd(159708.000000,201876.000000,63475.000000,9.373860)}
{pt3dadd(159396.000000,201540.000000,63050.000000,7.426584)}
{pt3dadd(159036.000000,201408.000000,62750.000000,3.874829)}
{pt3dadd(158832.000000,201096.000000,62200.000000,3.874829)}
{pt3dadd(158520.000000,201000.000000,61675.000000,3.874829)}
{pt3dadd(158112.000000,200736.000000,61100.000000,5.432350)}
{pt3dadd(157536.000000,200760.000000,60325.000000,3.057520)}
{pt3dadd(157512.000000,200580.000000,60075.000000,3.057520)}
{pt3dadd(157404.000000,200496.000000,59850.000000,3.057520)}
{pt3dadd(157080.000000,200256.000000,59450.000000,4.305454)}
{pt3dadd(156924.000000,200076.000000,59150.000000,2.747934)}
{pt3dadd(156732.000000,200076.000000,59150.000000,2.747934)}
{pt3dadd(156588.000000,199884.000000,58850.000000,2.747934)}
{pt3dadd(156156.000000,199848.000000,58650.000000,4.587797)}
{pt3dadd(155832.000000,199644.000000,58400.000000,3.339864)}
{pt3dadd(155640.000000,199524.000000,58175.000000,3.339864)}
{pt3dadd(155304.000000,199464.000000,57750.000000,3.339864)}
{pt3dadd(154992.000000,199212.000000,57300.000000,6.891618)}
{pt3dadd(154872.000000,199092.000000,56925.000000,5.051754)}
{pt3dadd(154968.000000,198768.000000,56600.000000,5.051754)}
{pt3dadd(155004.000000,198540.000000,56275.000000,5.051754)}
{pt3dadd(154716.000000,198684.000000,55775.000000,6.980779)}
{pt3dadd(154728.000000,198588.000000,54950.000000,6.338820)}
{pt3dadd(154608.000000,198396.000000,54725.000000,9.564700)}
{pt3dadd(154512.000000,197928.000000,54175.000000,16.048977)}

{create adhoc80}
{access adhoc80}
{connect adhoc80(1), adhoc78(0)}
{nseg = 1}
{strdef color color = "White"}
{pt3dclear()}
{pt3dadd(160704.000000,202080.000000,65075.000000,23.110527)}
{pt3dadd(160896.000000,200328.000000,64675.000000,13.553168)}
{pt3dadd(161028.000000,199968.000000,64525.000000,8.731901)}
{pt3dadd(161124.000000,199632.000000,64575.000000,7.961550)}
{pt3dadd(161208.000000,199296.000000,64475.000000,5.051754)}
{pt3dadd(161304.000000,198912.000000,64300.000000,5.051754)}
{pt3dadd(161292.000000,198540.000000,64000.000000,5.051754)}
{pt3dadd(161424.000000,198132.000000,63900.000000,8.449439)}
{pt3dadd(161544.000000,197796.000000,63775.000000,4.897684)}
{pt3dadd(161484.000000,197400.000000,63575.000000,4.897684)}
{pt3dadd(161616.000000,197088.000000,63375.000000,4.897684)}
{pt3dadd(161640.000000,196512.000000,62925.000000,7.807480)}
{pt3dadd(161556.000000,195540.000000,62400.000000,4.409795)}
{pt3dadd(161772.000000,194700.000000,61975.000000,4.409795)}
{pt3dadd(161880.000000,193560.000000,61150.000000,4.409795)}
{pt3dadd(161496.000000,192588.000000,60725.000000,6.338820)}
{pt3dadd(161184.000000,191208.000000,60350.000000,3.429025)}
{pt3dadd(161076.000000,190884.000000,60150.000000,3.429025)}
{pt3dadd(160752.000000,190584.000000,59775.000000,3.429025)}
{pt3dadd(160548.000000,189852.000000,59500.000000,4.986545)}
{pt3dadd(160320.000000,189156.000000,59200.000000,3.057520)}
{pt3dadd(160032.000000,188724.000000,59075.000000,3.057520)}
{pt3dadd(159768.000000,188004.000000,58700.000000,3.057520)}
{pt3dadd(160116.000000,187212.000000,58525.000000,4.615041)}
{pt3dadd(160308.000000,186888.000000,57975.000000,3.057520)}
{pt3dadd(160392.000000,186192.000000,57450.000000,3.057520)}
{pt3dadd(160668.000000,186060.000000,57100.000000,7.379626)}
{pt3dadd(160404.000000,185364.000000,55950.000000,11.516847)}
{pt3dadd(160644.000000,185148.000000,55475.000000,15.598878)}
{pt3dadd(160728.000000,184584.000000,54700.000000,22.186108)}

{create adhoc81}
{access adhoc81}
{connect adhoc81(1), adhoc77(0)}
{nseg = 1}
{strdef color color = "White"}
{pt3dclear()}
{pt3dadd(176976.000000,209736.000000,72600.000000,39.934990)}
{pt3dadd(176820.000000,210288.000000,71600.000000,20.231254)}
{pt3dadd(176940.000000,210420.000000,71225.000000,12.738752)}
{pt3dadd(176568.000000,210828.000000,70725.000000,6.980779)}
{pt3dadd(175836.000000,211188.000000,70300.000000,3.429025)}
{pt3dadd(175272.000000,211752.000000,69900.000000,3.429025)}
{pt3dadd(174576.000000,211920.000000,69500.000000,3.429025)}
{pt3dadd(173628.000000,211980.000000,68950.000000,5.358049)}
{pt3dadd(173340.000000,211428.000000,68400.000000,6.338820)}
{pt3dadd(173232.000000,210768.000000,68025.000000,7.896340)}
{pt3dadd(173436.000000,210348.000000,67600.000000,12.160567)}
{pt3dadd(173628.000000,210024.000000,67300.000000,9.287602)}

{create adhoc82}
{access adhoc82}
{connect adhoc82(1), adhoc76(0)}
{nseg = 1}
{strdef color color = "White"}
{pt3dclear()}
{pt3dadd(179892.000000,209460.000000,76775.000000,33.279160)}
{pt3dadd(178416.000000,210360.000000,77150.000000,13.742961)}
{pt3dadd(178080.000000,210996.000000,77525.000000,8.845777)}
{pt3dadd(177852.000000,210996.000000,77500.000000,4.418969)}
{pt3dadd(177576.000000,211092.000000,77675.000000,3.429025)}
{pt3dadd(177696.000000,211488.000000,77800.000000,3.429025)}
{pt3dadd(177684.000000,211788.000000,77925.000000,3.429025)}
{pt3dadd(177504.000000,211908.000000,78200.000000,4.203979)}
{pt3dadd(177288.000000,212220.000000,78050.000000,2.274954)}
{pt3dadd(177048.000000,212520.000000,78125.000000,2.834917)}
{pt3dadd(176400.000000,212808.000000,78200.000000,3.609871)}
{pt3dadd(176136.000000,212616.000000,78200.000000,3.724862)}
{pt3dadd(176052.000000,212616.000000,78225.000000,5.374770)}

{create adhoc83}
{access adhoc83}
{connect adhoc83(1), adhoc66(0)}
{nseg = 1}
{strdef color color = "White"}
{pt3dclear()}
{pt3dadd(185028.000000,206652.000000,85450.000000,27.732632)}
{pt3dadd(182676.000000,207324.000000,85075.000000,11.894119)}
{pt3dadd(182340.000000,207300.000000,85150.000000,8.928061)}
{pt3dadd(182100.000000,207312.000000,85050.000000,3.485983)}
{pt3dadd(181740.000000,207444.000000,84850.000000,4.478975)}
