# Supplementary material for: Full reconstruction of large lobula plate tangential cells in Drosophila from a 3D EM dataset
Source: PLoS One. 2018 Nov 28;13(11):e0207828. doi: 10.1371/journal.pone.0207828 (PMC6261601; doi:10.1371/journal.pone.0207828)
Supplement: S1 Dataset — (ZIP) [file pone.0207828.s001.zip › Diameter hoc/VS_VSL_preliminary/VS6_4skels_ck.001_completed.hoc0002.hoc]

/* created with convertKnossosNmlToHoc.m */

{create adhoc1}
{access adhoc1}
{nseg = 1}
{strdef color color = "White"}
{pt3dclear()}
{pt3dadd(160188.000000,132480.000000,182775.000000,1000.000000)}
{pt3dadd(160392.000000,132996.000000,182000.000000,373.581743)}
{pt3dadd(160692.000000,133824.000000,180425.000000,224.749046)}
{pt3dadd(160932.000000,134004.000000,178775.000000,59.091672)}
{pt3dadd(161208.000000,134004.000000,177575.000000,35.542626)}
{pt3dadd(161316.000000,133884.000000,176225.000000,35.542626)}
{pt3dadd(161472.000000,134088.000000,174575.000000,35.542626)}
{pt3dadd(162540.000000,134472.000000,173025.000000,58.137711)}
{pt3dadd(162516.000000,135144.000000,171175.000000,24.095085)}
{pt3dadd(162468.000000,135708.000000,170350.000000,24.095085)}
{pt3dadd(162516.000000,136536.000000,169425.000000,24.095085)}
{pt3dadd(162516.000000,137172.000000,168900.000000,42.874321)}
{pt3dadd(162252.000000,137664.000000,168350.000000,20.179236)}
{pt3dadd(162288.000000,137904.000000,168225.000000,20.179236)}
{pt3dadd(162252.000000,138444.000000,167825.000000,20.179236)}
{pt3dadd(161796.000000,138660.000000,167400.000000,36.441074)}
{pt3dadd(161376.000000,139176.000000,166850.000000,17.661838)}
{pt3dadd(160884.000000,139896.000000,166325.000000,17.761838)}
{pt3dadd(160656.000000,140340.000000,165975.000000,17.761838)}
{pt3dadd(160164.000000,140796.000000,165550.000000,31.263370)}
{pt3dadd(159756.000000,141300.000000,165250.000000,15.001532)}
{pt3dadd(159456.000000,141864.000000,164950.000000,15.001532)}
{pt3dadd(159144.000000,142356.000000,164675.000000,15.001532)}
{pt3dadd(158760.000000,142824.000000,164475.000000,22.688530)}
{pt3dadd(158388.000000,143256.000000,164150.000000,9.186998)}
{pt3dadd(157656.000000,144012.000000,163800.000000,9.186998)}
{pt3dadd(156720.000000,144672.000000,163475.000000,9.186998)}
{pt3dadd(156096.000000,145272.000000,163250.000000,19.486575)}
{pt3dadd(155580.000000,145932.000000,163100.000000,11.799577)}
{pt3dadd(154584.000000,146724.000000,162600.000000,11.799577)}
{pt3dadd(153576.000000,147456.000000,161975.000000,11.799577)}
{pt3dadd(152640.000000,148176.000000,161375.000000,27.398941)}
{pt3dadd(151608.000000,148740.000000,161050.000000,17.099364)}
{pt3dadd(151380.000000,148932.000000,160875.000000,17.099364)}
{pt3dadd(150996.000000,149520.000000,160450.000000,17.099364)}
{pt3dadd(150708.000000,149952.000000,159950.000000,39.694449)}
{pt3dadd(150348.000000,150432.000000,159375.000000,24.095085)}
{pt3dadd(150228.000000,150636.000000,158950.000000,24.095085)}
{pt3dadd(150636.000000,151116.000000,158600.000000,24.095085)}
{pt3dadd(150780.000000,151296.000000,158225.000000,51.269187)}
{pt3dadd(150840.000000,151572.000000,157750.000000,28.674102)}
{pt3dadd(150612.000000,151776.000000,157350.000000,28.674102)}
{pt3dadd(150984.000000,152064.000000,157000.000000,28.674102)}
{pt3dadd(150252.000000,152016.000000,156675.000000,52.223148)}
{pt3dadd(150528.000000,152424.000000,156350.000000,25.049046)}
{pt3dadd(150588.000000,152640.000000,155950.000000,25.049046)}
{pt3dadd(150588.000000,152604.000000,155550.000000,25.049046)}
{pt3dadd(150768.000000,152700.000000,155175.000000,48.598092)}
{pt3dadd(150828.000000,153072.000000,154775.000000,48.598092)}
{pt3dadd(151212.000000,153288.000000,154225.000000,79.996820)}
{pt3dadd(151164.000000,153612.000000,153775.000000,119.245230)}

{create adhoc2}
{access adhoc2}
{connect adhoc2(1), adhoc1(0)}
{nseg = 1}
{strdef color color = "White"}
{pt3dclear()}
{pt3dadd(151164.000000,153612.000000,153775.000000,119.245230)}
{pt3dadd(151224.000000,153744.000000,153325.000000,79.996820)}
{pt3dadd(151104.000000,153960.000000,152825.000000,48.598092)}
{pt3dadd(151032.000000,154176.000000,152325.000000,44.623251)}
{pt3dadd(150924.000000,154836.000000,151800.000000,21.074205)}
{pt3dadd(151032.000000,155280.000000,151450.000000,21.074205)}
{pt3dadd(151104.000000,155652.000000,151100.000000,21.074205)}
{pt3dadd(151308.000000,155952.000000,150600.000000,40.648410)}
{pt3dadd(151632.000000,156084.000000,150000.000000,21.074205)}
{pt3dadd(151560.000000,155964.000000,149325.000000,21.074205)}
{pt3dadd(151452.000000,156144.000000,148925.000000,21.074205)}
{pt3dadd(151596.000000,156096.000000,148475.000000,39.853445)}
{pt3dadd(151692.000000,156312.000000,148075.000000,20.279240)}
{pt3dadd(151932.000000,156552.000000,147650.000000,20.279240)}
{pt3dadd(152208.000000,156732.000000,147225.000000,20.279240)}
{pt3dadd(152244.000000,156768.000000,146775.000000,31.480517)}
{pt3dadd(152388.000000,157092.000000,146350.000000,12.701277)}
{pt3dadd(152760.000000,157668.000000,145875.000000,12.701277)}
{pt3dadd(153000.000000,158040.000000,145425.000000,12.701277)}
{pt3dadd(153180.000000,158376.000000,144950.000000,20.388275)}
{pt3dadd(153648.000000,158580.000000,144450.000000,9.186998)}
{pt3dadd(153984.000000,159096.000000,143925.000000,9.186998)}
{pt3dadd(154188.000000,159528.000000,143500.000000,9.186998)}
{pt3dadd(154764.000000,159972.000000,143025.000000,20.388275)}
{pt3dadd(154872.000000,160356.000000,142575.000000,12.701277)}
{pt3dadd(155196.000000,160536.000000,142175.000000,12.701277)}
{pt3dadd(155376.000000,161196.000000,141775.000000,12.701277)}
{pt3dadd(155484.000000,161340.000000,141225.000000,20.388275)}
{pt3dadd(155880.000000,161748.000000,140775.000000,9.186998)}
{pt3dadd(156516.000000,162048.000000,140375.000000,9.186998)}
{pt3dadd(157056.000000,162408.000000,139925.000000,9.186998)}
{pt3dadd(157272.000000,162540.000000,139825.000000,16.554517)}
{pt3dadd(157788.000000,163044.000000,139400.000000,8.867519)}
{pt3dadd(158148.000000,163656.000000,138925.000000,8.867519)}
{pt3dadd(158604.000000,164280.000000,138425.000000,8.867519)}
{pt3dadd(157872.000000,164976.000000,137900.000000,16.554517)}
{pt3dadd(157980.000000,164952.000000,137450.000000,9.186998)}
{pt3dadd(158280.000000,164880.000000,137025.000000,9.186998)}
{pt3dadd(159048.000000,165060.000000,136600.000000,9.186998)}
{pt3dadd(159816.000000,165120.000000,136200.000000,18.088020)}
{pt3dadd(160512.000000,165396.000000,135700.000000,10.401022)}
{pt3dadd(161124.000000,165600.000000,135300.000000,10.401022)}
{pt3dadd(161952.000000,165924.000000,134900.000000,10.401022)}
{pt3dadd(162564.000000,166260.000000,134450.000000,19.685420)}
{pt3dadd(163248.000000,166776.000000,134050.000000,10.784398)}
{pt3dadd(164004.000000,167268.000000,133650.000000,10.784398)}
{pt3dadd(164184.000000,167448.000000,133750.000000,10.784398)}
{pt3dadd(164412.000000,167736.000000,133750.000000,18.471396)}
{pt3dadd(164652.000000,168024.000000,133550.000000,9.186998)}
{pt3dadd(164868.000000,168060.000000,133400.000000,9.186998)}
{pt3dadd(165060.000000,168300.000000,133275.000000,9.186998)}
{pt3dadd(165288.000000,168480.000000,133225.000000,15.542830)}
{pt3dadd(165504.000000,168720.000000,133125.000000,7.855832)}
{pt3dadd(165720.000000,169056.000000,132975.000000,7.855832)}
{pt3dadd(165912.000000,169224.000000,132925.000000,7.855832)}
{pt3dadd(166092.000000,169476.000000,132875.000000,16.756854)}
{pt3dadd(166260.000000,169800.000000,132625.000000,10.401022)}
{pt3dadd(166476.000000,169968.000000,132475.000000,10.401022)}
{pt3dadd(166704.000000,170136.000000,132425.000000,10.401022)}
{pt3dadd(166920.000000,170532.000000,132300.000000,19.685420)}
{pt3dadd(167148.000000,170868.000000,132200.000000,10.784398)}
{pt3dadd(167316.000000,171084.000000,132075.000000,10.784398)}
{pt3dadd(167532.000000,171300.000000,131775.000000,10.784398)}
{pt3dadd(167760.000000,171552.000000,131650.000000,21.985675)}
{pt3dadd(168000.000000,171924.000000,131450.000000,12.701277)}
{pt3dadd(168192.000000,172164.000000,131325.000000,12.701277)}
{pt3dadd(168456.000000,172452.000000,131225.000000,12.701277)}
{pt3dadd(168684.000000,172788.000000,131100.000000,21.985675)}
{pt3dadd(168888.000000,172992.000000,130800.000000,10.784398)}
{pt3dadd(169068.000000,173196.000000,130600.000000,10.784398)}
{pt3dadd(169320.000000,173664.000000,130375.000000,10.784398)}
{pt3dadd(169524.000000,173868.000000,130125.000000,20.068796)}
{pt3dadd(169716.000000,174072.000000,130075.000000,10.784398)}
{pt3dadd(169932.000000,174324.000000,129950.000000,10.784398)}
{pt3dadd(170184.000000,174504.000000,129750.000000,10.784398)}
{pt3dadd(170388.000000,174756.000000,129625.000000,18.471396)}
{pt3dadd(170592.000000,175032.000000,129425.000000,9.186998)}
{pt3dadd(170844.000000,175308.000000,129250.000000,9.186998)}
{pt3dadd(171132.000000,175524.000000,129125.000000,9.186998)}
{pt3dadd(171336.000000,175692.000000,129025.000000,18.471396)}
{pt3dadd(171528.000000,175992.000000,128950.000000,10.784398)}
{pt3dadd(171732.000000,176208.000000,128925.000000,10.784398)}
{pt3dadd(171912.000000,176304.000000,128850.000000,10.784398)}
{pt3dadd(172092.000000,176520.000000,128800.000000,20.068796)}
{pt3dadd(172236.000000,176592.000000,128750.000000,10.784398)}
{pt3dadd(172464.000000,176688.000000,128600.000000,10.784398)}
{pt3dadd(172632.000000,176796.000000,128500.000000,10.784398)}
{pt3dadd(172812.000000,176940.000000,128350.000000,19.685420)}
{pt3dadd(173040.000000,177120.000000,128300.000000,10.401022)}
{pt3dadd(173268.000000,177336.000000,128150.000000,10.401022)}
{pt3dadd(173472.000000,177156.000000,128050.000000,10.401022)}
{pt3dadd(173652.000000,177336.000000,128000.000000,16.756854)}
{pt3dadd(173820.000000,177576.000000,127950.000000,7.855832)}
{pt3dadd(174000.000000,177816.000000,127900.000000,7.855832)}
{pt3dadd(174180.000000,177876.000000,127850.000000,7.855832)}
{pt3dadd(174360.000000,178008.000000,127825.000000,12.177937)}
{pt3dadd(174540.000000,178260.000000,127775.000000,5.822105)}
{pt3dadd(174720.000000,178512.000000,127725.000000,5.822105)}
{pt3dadd(174888.000000,178536.000000,127700.000000,5.822105)}
{pt3dadd(175092.000000,178740.000000,127600.000000,9.219789)}
{pt3dadd(175296.000000,178872.000000,127475.000000,4.897684)}
{pt3dadd(175512.000000,178944.000000,127475.000000,4.897684)}
{pt3dadd(175728.000000,179076.000000,127475.000000,4.897684)}
{pt3dadd(175980.000000,179208.000000,127475.000000,10.144210)}
{pt3dadd(176172.000000,179496.000000,127450.000000,6.746526)}
{pt3dadd(176400.000000,179796.000000,127400.000000,6.746526)}
{pt3dadd(176592.000000,179976.000000,127325.000000,6.746526)}
{pt3dadd(176844.000000,180216.000000,127200.000000,14.433524)}
{pt3dadd(177096.000000,180420.000000,127075.000000,9.186998)}
{pt3dadd(177276.000000,180624.000000,126950.000000,9.186998)}
{pt3dadd(177432.000000,180828.000000,126825.000000,9.186998)}
{pt3dadd(177684.000000,181164.000000,126575.000000,20.388275)}
{pt3dadd(177876.000000,181296.000000,126475.000000,12.701277)}
{pt3dadd(178080.000000,181512.000000,126275.000000,12.701277)}
{pt3dadd(178308.000000,181548.000000,126250.000000,12.701277)}
{pt3dadd(178536.000000,181728.000000,126000.000000,23.902554)}
{pt3dadd(178764.000000,181872.000000,125800.000000,12.701277)}
{pt3dadd(178968.000000,182016.000000,125600.000000,12.701277)}
{pt3dadd(179136.000000,182196.000000,125425.000000,12.701277)}
{pt3dadd(179364.000000,182364.000000,125175.000000,23.442503)}
{pt3dadd(179556.000000,182532.000000,125075.000000,12.241226)}
{pt3dadd(179724.000000,182664.000000,125025.000000,12.241226)}
{pt3dadd(179892.000000,182808.000000,124850.000000,12.241226)}
{pt3dadd(180120.000000,182988.000000,124625.000000,21.525624)}
{pt3dadd(180300.000000,183048.000000,124550.000000,10.784398)}
{pt3dadd(180516.000000,183252.000000,124350.000000,10.784398)}
{pt3dadd(180672.000000,183348.000000,124200.000000,10.784398)}
{pt3dadd(180876.000000,183528.000000,124075.000000,18.151917)}
{pt3dadd(180876.000000,183456.000000,123700.000000,8.867519)}
{pt3dadd(181428.000000,183780.000000,123350.000000,8.867519)}
{pt3dadd(181608.000000,183936.000000,123525.000000,8.867519)}
{pt3dadd(181788.000000,184008.000000,123400.000000,18.151917)}
{pt3dadd(182004.000000,183972.000000,123275.000000,10.784398)}
{pt3dadd(182184.000000,184080.000000,123025.000000,10.784398)}
{pt3dadd(182472.000000,184320.000000,122825.000000,10.784398)}
{pt3dadd(182724.000000,184500.000000,122475.000000,18.151917)}
{pt3dadd(182940.000000,184632.000000,122400.000000,8.867519)}
{pt3dadd(183120.000000,184668.000000,122275.000000,8.867519)}
{pt3dadd(183324.000000,184920.000000,122075.000000,8.867519)}
{pt3dadd(183504.000000,184944.000000,121925.000000,18.151917)}
{pt3dadd(183696.000000,185052.000000,121800.000000,19.685420)}
{pt3dadd(183876.000000,185220.000000,121600.000000,28.969818)}
{pt3dadd(183984.000000,185496.000000,121200.000000,47.283029)}
{pt3dadd(184284.000000,185784.000000,120850.000000,47.921990)}

{create adhoc3}
{access adhoc3}
{connect adhoc3(1), adhoc2(0)}
{nseg = 1}
{strdef color color = "White"}
{pt3dclear()}
{pt3dadd(184284.000000,185784.000000,120850.000000,47.921990)}
{pt3dadd(184620.000000,185988.000000,120425.000000,32.447993)}
{pt3dadd(184944.000000,186144.000000,119975.000000,20.068796)}
{pt3dadd(185448.000000,186504.000000,119575.000000,24.285930)}
{pt3dadd(185652.000000,186732.000000,119250.000000,15.001532)}
{pt3dadd(185796.000000,186864.000000,118925.000000,15.001532)}
{pt3dadd(186084.000000,187104.000000,118525.000000,15.001532)}
{pt3dadd(186444.000000,187428.000000,118075.000000,26.202809)}
{pt3dadd(186840.000000,187608.000000,117625.000000,12.701277)}
{pt3dadd(187128.000000,187776.000000,117225.000000,12.701277)}
{pt3dadd(187188.000000,187968.000000,116950.000000,12.701277)}
{pt3dadd(187548.000000,188412.000000,116575.000000,23.442503)}
{pt3dadd(187752.000000,188664.000000,116225.000000,12.241226)}
{pt3dadd(188184.000000,189168.000000,115825.000000,12.241226)}
{pt3dadd(188400.000000,189648.000000,115400.000000,12.241226)}
{pt3dadd(188640.000000,189948.000000,115025.000000,23.442503)}
{pt3dadd(188736.000000,190524.000000,114550.000000,12.701277)}
{pt3dadd(188880.000000,190932.000000,114150.000000,12.701277)}
{pt3dadd(189156.000000,191232.000000,113775.000000,12.701277)}
{pt3dadd(189444.000000,191712.000000,113450.000000,23.442503)}
{pt3dadd(189720.000000,192228.000000,112975.000000,12.241225)}
{pt3dadd(189924.000000,192444.000000,112600.000000,12.241225)}
{pt3dadd(190272.000000,192924.000000,112200.000000,12.241225)}
{pt3dadd(190752.000000,193464.000000,111775.000000,27.840591)}
{pt3dadd(191028.000000,193644.000000,111375.000000,17.099365)}
{pt3dadd(191316.000000,193896.000000,111000.000000,17.099365)}
{pt3dadd(191388.000000,193956.000000,110650.000000,17.099365)}
{pt3dadd(191592.000000,194424.000000,110175.000000,40.648411)}
{pt3dadd(191772.000000,194664.000000,109725.000000,25.049046)}
{pt3dadd(191940.000000,194868.000000,109250.000000,25.049046)}
{pt3dadd(191964.000000,195012.000000,108875.000000,25.049046)}
{pt3dadd(191988.000000,195180.000000,108425.000000,44.623251)}
{pt3dadd(192084.000000,195432.000000,108050.000000,21.074205)}
{pt3dadd(192120.000000,195684.000000,107625.000000,21.074205)}
{pt3dadd(192252.000000,195864.000000,107200.000000,21.074205)}
{pt3dadd(192288.000000,195936.000000,106775.000000,39.090273)}
{pt3dadd(192420.000000,195960.000000,106375.000000,19.516068)}
{pt3dadd(192480.000000,196092.000000,106000.000000,19.516068)}
{pt3dadd(192324.000000,196368.000000,105600.000000,19.516068)}
{pt3dadd(192408.000000,196800.000000,105200.000000,35.777906)}
{pt3dadd(192480.000000,196944.000000,104725.000000,17.761838)}
{pt3dadd(192480.000000,197304.000000,104250.000000,17.761838)}
{pt3dadd(192624.000000,197640.000000,103775.000000,17.761838)}
{pt3dadd(192912.000000,197592.000000,103325.000000,44.935940)}
{pt3dadd(192912.000000,197664.000000,102825.000000,28.674102)}
{pt3dadd(193212.000000,197796.000000,102375.000000,28.674102)}
{pt3dadd(193308.000000,197856.000000,101975.000000,28.674102)}
{pt3dadd(193332.000000,197880.000000,101625.000000,56.992958)}
{pt3dadd(193284.000000,197940.000000,101325.000000,29.818856)}
{pt3dadd(193200.000000,197928.000000,100975.000000,29.818856)}
{pt3dadd(193128.000000,197916.000000,100550.000000,29.818856)}
{pt3dadd(193116.000000,197952.000000,100125.000000,52.413941)}
{pt3dadd(193044.000000,197916.000000,99725.000000,24.095085)}
{pt3dadd(192924.000000,197796.000000,99350.000000,24.095085)}
{pt3dadd(192696.000000,197892.000000,98975.000000,24.095085)}
{pt3dadd(192864.000000,198024.000000,98550.000000,47.644131)}
{pt3dadd(192816.000000,198012.000000,98100.000000,25.049046)}
{pt3dadd(192876.000000,198144.000000,97625.000000,25.049046)}
{pt3dadd(192732.000000,198288.000000,97150.000000,25.049046)}
{pt3dadd(192468.000000,198504.000000,96675.000000,47.644131)}
{pt3dadd(192348.000000,198624.000000,96200.000000,43.669290)}
{pt3dadd(192240.000000,198648.000000,95725.000000,71.782150)}
{pt3dadd(192120.000000,198684.000000,95325.000000,99.371025)}

{create adhoc4}
{access adhoc4}
{connect adhoc4(1), adhoc3(0)}
{nseg = 1}
{strdef color color = "White"}
{pt3dclear()}
{pt3dadd(192120.000000,198684.000000,95325.000000,99.371025)}
{pt3dadd(192108.000000,198828.000000,94825.000000,66.747350)}
{pt3dadd(192120.000000,198756.000000,94350.000000,40.648410)}
{pt3dadd(192300.000000,198672.000000,93900.000000,31.815430)}
{pt3dadd(192816.000000,197940.000000,93525.000000,12.241225)}
{pt3dadd(192792.000000,197724.000000,93550.000000,12.241225)}
{pt3dadd(193128.000000,197448.000000,93350.000000,12.241225)}
{pt3dadd(193188.000000,197232.000000,93375.000000,22.982451)}
{pt3dadd(193296.000000,196692.000000,93200.000000,12.241225)}
{pt3dadd(193320.000000,196248.000000,93025.000000,12.241225)}
{pt3dadd(193488.000000,196008.000000,92925.000000,12.241225)}
{pt3dadd(193488.000000,195792.000000,92725.000000,22.982451)}
{pt3dadd(193488.000000,195576.000000,92525.000000,12.241226)}
{pt3dadd(193620.000000,195360.000000,92825.000000,12.241226)}
{pt3dadd(193608.000000,195156.000000,92825.000000,12.241226)}
{pt3dadd(193680.000000,194964.000000,92725.000000,21.525624)}
{pt3dadd(193704.000000,194736.000000,92625.000000,10.784398)}
{pt3dadd(193836.000000,194496.000000,92400.000000,10.784398)}
{pt3dadd(193836.000000,194280.000000,92250.000000,10.784398)}
{pt3dadd(193944.000000,194052.000000,92400.000000,21.985675)}
{pt3dadd(194112.000000,193824.000000,91875.000000,12.701277)}
{pt3dadd(194136.000000,193608.000000,91900.000000,12.701277)}
{pt3dadd(194304.000000,193404.000000,91800.000000,12.701277)}
{pt3dadd(194340.000000,193200.000000,91075.000000,21.985675)}
{pt3dadd(194472.000000,192984.000000,90775.000000,10.784398)}
{pt3dadd(194316.000000,192732.000000,90725.000000,10.784398)}
{pt3dadd(194616.000000,192480.000000,90375.000000,10.784398)}
{pt3dadd(194868.000000,192144.000000,90100.000000,20.068796)}
{pt3dadd(194964.000000,192000.000000,89800.000000,10.784398)}
{pt3dadd(195036.000000,191736.000000,89425.000000,10.784398)}
{pt3dadd(195060.000000,191364.000000,89025.000000,10.784398)}
{pt3dadd(195084.000000,191172.000000,88675.000000,23.733868)}
{pt3dadd(195372.000000,190608.000000,88400.000000,14.449470)}
{pt3dadd(195684.000000,190188.000000,88100.000000,14.449470)}
{pt3dadd(195564.000000,189996.000000,87500.000000,14.449470)}
{pt3dadd(195876.000000,189744.000000,87250.000000,25.650747)}
{pt3dadd(196128.000000,189552.000000,87275.000000,12.701277)}
{pt3dadd(196236.000000,189372.000000,87100.000000,12.701277)}
{pt3dadd(196296.000000,189156.000000,87050.000000,12.701277)}
{pt3dadd(196356.000000,188928.000000,87000.000000,23.902554)}
{pt3dadd(196464.000000,188724.000000,86900.000000,12.701277)}
{pt3dadd(196572.000000,188544.000000,86875.000000,12.701277)}
{pt3dadd(196716.000000,188388.000000,86850.000000,12.701277)}
{pt3dadd(196812.000000,188196.000000,86825.000000,23.902554)}
{pt3dadd(196596.000000,188028.000000,86650.000000,12.701277)}
{pt3dadd(196620.000000,187836.000000,86700.000000,12.701277)}
{pt3dadd(196644.000000,187668.000000,86700.000000,12.701277)}
{pt3dadd(196668.000000,187488.000000,86700.000000,23.902554)}
{pt3dadd(196632.000000,187332.000000,86575.000000,23.902554)}
{pt3dadd(196728.000000,187128.000000,86450.000000,35.813267)}
{pt3dadd(196680.000000,186912.000000,86475.000000,58.688778)}
{pt3dadd(196632.000000,186840.000000,86500.000000,61.053562)}

{create adhoc5}
{access adhoc5}
{connect adhoc5(1), adhoc4(0)}
{nseg = 1}
{strdef color color = "White"}
{pt3dclear()}
{pt3dadd(196632.000000,186840.000000,86500.000000,61.053562)}
{pt3dadd(196524.000000,186564.000000,86425.000000,41.202375)}
{pt3dadd(196308.000000,186324.000000,86375.000000,25.321425)}
{pt3dadd(196332.000000,186156.000000,86325.000000,22.695110)}
{pt3dadd(196548.000000,185916.000000,86250.000000,10.784398)}
{pt3dadd(196548.000000,185700.000000,86025.000000,10.784398)}
{pt3dadd(196512.000000,185496.000000,85925.000000,10.784398)}
{pt3dadd(196476.000000,185292.000000,85875.000000,19.685420)}
{pt3dadd(196500.000000,185100.000000,85775.000000,10.401022)}
{pt3dadd(196452.000000,184920.000000,85700.000000,10.401022)}
{pt3dadd(196404.000000,184728.000000,85700.000000,10.401022)}
{pt3dadd(196404.000000,184536.000000,85650.000000,21.142248)}
{pt3dadd(196404.000000,184368.000000,85600.000000,12.241226)}
{pt3dadd(196404.000000,184212.000000,85550.000000,12.241226)}
{pt3dadd(196404.000000,184008.000000,85500.000000,12.241226)}
{pt3dadd(196404.000000,183804.000000,85450.000000,23.442503)}
{pt3dadd(196428.000000,183612.000000,85175.000000,23.442503)}
{pt3dadd(196416.000000,183444.000000,85050.000000,34.643780)}
{pt3dadd(196404.000000,183252.000000,84925.000000,56.739633)}
{pt3dadd(196464.000000,183180.000000,85025.000000,57.506386)}

{create adhoc6}
{access adhoc6}
{connect adhoc6(1), adhoc5(0)}
{nseg = 1}
{strdef color color = "White"}
{pt3dclear()}
{pt3dadd(196464.000000,183180.000000,85025.000000,57.506386)}
{pt3dadd(196668.000000,183000.000000,85150.000000,38.070839)}
{pt3dadd(196800.000000,182808.000000,85225.000000,23.442503)}
{pt3dadd(196680.000000,182604.000000,85225.000000,21.525624)}
{pt3dadd(196752.000000,182388.000000,85250.000000,10.784398)}
{pt3dadd(196752.000000,182184.000000,85200.000000,10.784398)}
{pt3dadd(196752.000000,181992.000000,85150.000000,10.784398)}
{pt3dadd(196752.000000,181800.000000,85100.000000,20.068796)}
{pt3dadd(196752.000000,181608.000000,85050.000000,10.784398)}
{pt3dadd(196812.000000,181416.000000,85000.000000,10.784398)}
{pt3dadd(196848.000000,181236.000000,85025.000000,10.784398)}
{pt3dadd(196884.000000,181056.000000,85050.000000,20.068796)}
{pt3dadd(196920.000000,180852.000000,85075.000000,10.784398)}
{pt3dadd(197028.000000,180648.000000,85025.000000,10.784398)}
{pt3dadd(197016.000000,180408.000000,84975.000000,10.784398)}
{pt3dadd(196908.000000,180192.000000,85025.000000,21.083975)}
{pt3dadd(196872.000000,179988.000000,85050.000000,11.799577)}
{pt3dadd(196908.000000,179808.000000,84950.000000,11.799577)}
{pt3dadd(196908.000000,179604.000000,84900.000000,11.799577)}
{pt3dadd(197076.000000,179400.000000,84625.000000,21.083975)}
{pt3dadd(197076.000000,179208.000000,84625.000000,10.784398)}
{pt3dadd(196968.000000,179028.000000,84525.000000,10.784398)}
{pt3dadd(196920.000000,178812.000000,84425.000000,10.784398)}
{pt3dadd(197028.000000,178644.000000,84475.000000,20.068796)}
{pt3dadd(197136.000000,178476.000000,84525.000000,10.784398)}
{pt3dadd(197100.000000,178308.000000,84475.000000,10.784398)}
{pt3dadd(197136.000000,178092.000000,84275.000000,10.784398)}
{pt3dadd(197172.000000,177864.000000,84250.000000,20.068796)}
{pt3dadd(197088.000000,177672.000000,84175.000000,10.784398)}
{pt3dadd(197004.000000,177444.000000,84100.000000,10.784398)}
{pt3dadd(197040.000000,177264.000000,84000.000000,10.784398)}
{pt3dadd(197076.000000,177060.000000,83900.000000,21.525624)}
{pt3dadd(197100.000000,176856.000000,83775.000000,12.241226)}
{pt3dadd(197124.000000,176652.000000,83700.000000,12.241226)}
{pt3dadd(197160.000000,176460.000000,83650.000000,12.241226)}
{pt3dadd(197196.000000,176268.000000,83600.000000,25.742758)}
{pt3dadd(197328.000000,176088.000000,83550.000000,31.263370)}
{pt3dadd(197400.000000,175908.000000,83400.000000,51.105617)}
{pt3dadd(197472.000000,175680.000000,83250.000000,82.809190)}

{create adhoc7}
{access adhoc7}
{connect adhoc7(1), adhoc6(0)}
{nseg = 1}
{strdef color color = "White"}
{pt3dclear()}
{pt3dadd(197472.000000,175680.000000,83250.000000,82.809190)}
{pt3dadd(197472.000000,175308.000000,80900.000000,47.271859)}
{pt3dadd(197520.000000,175344.000000,80425.000000,28.963115)}
{pt3dadd(197448.000000,175356.000000,80025.000000,23.902554)}
{pt3dadd(197340.000000,175296.000000,79625.000000,12.701277)}
{pt3dadd(197220.000000,175236.000000,79250.000000,23.000854)}
{pt3dadd(196932.000000,175332.000000,78925.000000,31.901875)}
{pt3dadd(196824.000000,175344.000000,78575.000000,33.500997)}
{pt3dadd(196608.000000,175296.000000,78225.000000,46.005108)}

{create adhoc8}
{access adhoc8}
{connect adhoc8(1), adhoc7(0)}
{nseg = 1}
{strdef color color = "White"}
{pt3dclear()}
{pt3dadd(196608.000000,175296.000000,78225.000000,46.005108)}
{pt3dadd(196320.000000,175320.000000,77725.000000,29.146699)}
{pt3dadd(196080.000000,175404.000000,77425.000000,18.088020)}
{pt3dadd(195828.000000,175452.000000,77100.000000,15.276596)}
{pt3dadd(195372.000000,175524.000000,76800.000000,7.589598)}
{pt3dadd(195204.000000,175560.000000,76675.000000,7.589598)}
{pt3dadd(195048.000000,175596.000000,76550.000000,7.589598)}
{pt3dadd(194880.000000,175548.000000,76275.000000,12.836125)}
{pt3dadd(194688.000000,175572.000000,76225.000000,6.746526)}
{pt3dadd(194496.000000,175548.000000,76175.000000,6.746526)}
{pt3dadd(194280.000000,175560.000000,76100.000000,6.746526)}
{pt3dadd(193980.000000,175536.000000,75700.000000,13.102358)}
{pt3dadd(193704.000000,175488.000000,75425.000000,7.855832)}
{pt3dadd(193476.000000,175560.000000,75350.000000,7.855832)}
{pt3dadd(193296.000000,175644.000000,75100.000000,13.102358)}
{pt3dadd(193080.000000,175656.000000,74800.000000,16.654113)}
{pt3dadd(192912.000000,175644.000000,74625.000000,16.163801)}
{pt3dadd(192744.000000,175740.000000,74300.000000,19.258772)}

{create adhoc9}
{access adhoc9}
{connect adhoc9(1), adhoc8(0)}
{nseg = 1}
{strdef color color = "White"}
{pt3dclear()}
{pt3dadd(192744.000000,175740.000000,74300.000000,19.258772)}
{pt3dadd(192552.000000,175932.000000,73975.000000,15.794033)}
{pt3dadd(192276.000000,176148.000000,73700.000000,10.076420)}
{pt3dadd(192084.000000,176244.000000,73400.000000,11.771192)}
{pt3dadd(191832.000000,176316.000000,73075.000000,6.746526)}
{pt3dadd(192000.000000,176460.000000,72700.000000,6.746526)}
{pt3dadd(192084.000000,176604.000000,72375.000000,6.746526)}
{pt3dadd(192168.000000,176772.000000,72075.000000,11.993053)}
{pt3dadd(192192.000000,177000.000000,71675.000000,6.746526)}
{pt3dadd(191940.000000,177132.000000,71325.000000,6.746526)}
{pt3dadd(191676.000000,177288.000000,70950.000000,6.746526)}
{pt3dadd(191244.000000,177372.000000,70575.000000,11.993053)}
{pt3dadd(190896.000000,177432.000000,70300.000000,6.746526)}
{pt3dadd(190560.000000,177432.000000,70050.000000,6.746526)}
{pt3dadd(190344.000000,177552.000000,69900.000000,6.746526)}
{pt3dadd(190140.000000,177564.000000,69725.000000,11.771192)}
{pt3dadd(189960.000000,177516.000000,69650.000000,6.524665)}
{pt3dadd(189756.000000,177552.000000,69500.000000,6.524665)}
{pt3dadd(189552.000000,177552.000000,69525.000000,6.524665)}
{pt3dadd(189372.000000,177684.000000,69325.000000,12.880497)}
{pt3dadd(189168.000000,177684.000000,69100.000000,7.855832)}
{pt3dadd(188976.000000,177684.000000,68900.000000,7.855832)}
{pt3dadd(188784.000000,177648.000000,68850.000000,7.855832)}
{pt3dadd(188616.000000,177660.000000,68800.000000,10.230661)}
{pt3dadd(188424.000000,177588.000000,68375.000000,6.784625)}
{pt3dadd(188328.000000,177600.000000,67850.000000,10.307708)}
{pt3dadd(188160.000000,177288.000000,67600.000000,16.048977)}

{create adhoc10}
{access adhoc10}
{connect adhoc10(1), adhoc9(0)}
{nseg = 1}
{strdef color color = "White"}
{pt3dclear()}
{pt3dadd(188160.000000,177288.000000,67600.000000,16.048977)}
{pt3dadd(188136.000000,176856.000000,67275.000000,12.012466)}
{pt3dadd(188028.000000,176376.000000,66925.000000,7.807479)}
{pt3dadd(188040.000000,176028.000000,66550.000000,7.807479)}
{pt3dadd(188052.000000,175572.000000,66300.000000,4.409795)}
{pt3dadd(188088.000000,175356.000000,66050.000000,4.409795)}
{pt3dadd(188016.000000,174876.000000,65750.000000,4.409795)}
{pt3dadd(188052.000000,174528.000000,65525.000000,6.784625)}
{pt3dadd(188076.000000,174612.000000,65275.000000,3.874829)}
{pt3dadd(187944.000000,174636.000000,64975.000000,3.874829)}
{pt3dadd(187728.000000,174636.000000,64700.000000,3.874829)}
{pt3dadd(187452.000000,174588.000000,64375.000000,6.249659)}
{pt3dadd(187356.000000,174348.000000,64050.000000,3.874829)}
{pt3dadd(187488.000000,173700.000000,63775.000000,3.874829)}
{pt3dadd(187608.000000,173184.000000,63525.000000,3.874829)}
{pt3dadd(187680.000000,172968.000000,63250.000000,4.470624)}
{pt3dadd(187716.000000,172404.000000,63200.000000,2.870749)}
{pt3dadd(187476.000000,172032.000000,63175.000000,3.784582)}
{pt3dadd(187248.000000,171864.000000,63175.000000,5.374770)}

{create adhoc11}
{access adhoc11}
{connect adhoc11(1), adhoc9(0)}
{nseg = 1}
{strdef color color = "White"}
{pt3dclear()}
{pt3dadd(188160.000000,177288.000000,67600.000000,16.048977)}
{pt3dadd(187776.000000,177984.000000,67500.000000,8.429549)}
{pt3dadd(187368.000000,178104.000000,67300.000000,5.657729)}
{pt3dadd(187224.000000,178056.000000,67275.000000,4.676958)}
{pt3dadd(187104.000000,178092.000000,67150.000000,3.429025)}
{pt3dadd(186996.000000,178056.000000,67100.000000,3.429025)}
{pt3dadd(186864.000000,178116.000000,66950.000000,3.429025)}
{pt3dadd(186720.000000,178248.000000,66775.000000,7.566246)}
{pt3dadd(186636.000000,178344.000000,66575.000000,5.637222)}
{pt3dadd(186612.000000,178368.000000,66350.000000,6.627166)}
{pt3dadd(186564.000000,178296.000000,66075.000000,8.184687)}
{pt3dadd(186696.000000,178212.000000,65850.000000,5.745775)}
{pt3dadd(186756.000000,178044.000000,65675.000000,9.287602)}

{create adhoc12}
{access adhoc12}
{connect adhoc12(1), adhoc8(0)}
{nseg = 1}
{strdef color color = "White"}
{pt3dclear()}
{pt3dadd(192744.000000,175740.000000,74300.000000,19.258772)}
{pt3dadd(192720.000000,175272.000000,74350.000000,9.069499)}
{pt3dadd(192756.000000,175092.000000,74200.000000,6.816653)}
{pt3dadd(192696.000000,174852.000000,74025.000000,4.039853)}
{pt3dadd(192732.000000,174480.000000,73850.000000,4.083180)}
{pt3dadd(192684.000000,174036.000000,73650.000000,5.374770)}

{create adhoc13}
{access adhoc13}
{connect adhoc13(1), adhoc12(0)}
{nseg = 1}
{strdef color color = "White"}
{pt3dclear()}
{pt3dadd(192684.000000,174036.000000,73650.000000,5.374770)}
{pt3dadd(192588.000000,174072.000000,73475.000000,6.006631)}
{pt3dadd(192528.000000,174084.000000,73275.000000,6.105509)}
{pt3dadd(192516.000000,174036.000000,73075.000000,4.669217)}
{pt3dadd(192480.000000,173940.000000,72850.000000,5.374770)}

{create adhoc14}
{access adhoc14}
{connect adhoc14(1), adhoc12(0)}
{nseg = 1}
{strdef color color = "White"}
{pt3dclear()}
{pt3dadd(192684.000000,174036.000000,73650.000000,5.374770)}
{pt3dadd(192816.000000,173712.000000,73625.000000,4.083180)}
{pt3dadd(192888.000000,173388.000000,73450.000000,4.039853)}
{pt3dadd(192948.000000,173292.000000,73300.000000,4.039853)}
{pt3dadd(193056.000000,173160.000000,73125.000000,4.441498)}
{pt3dadd(193236.000000,172884.000000,72975.000000,5.374770)}

{create adhoc15}
{access adhoc15}
{connect adhoc15(1), adhoc7(0)}
{nseg = 1}
{strdef color color = "White"}
{pt3dclear()}
{pt3dadd(196608.000000,175296.000000,78225.000000,46.005108)}
{pt3dadd(195300.000000,174540.000000,78100.000000,18.414926)}
{pt3dadd(194808.000000,174396.000000,78100.000000,11.648955)}
{pt3dadd(194268.000000,174384.000000,78100.000000,3.343729)}
{pt3dadd(194124.000000,174336.000000,78050.000000,3.085740)}
{pt3dadd(193968.000000,174324.000000,77925.000000,3.860694)}
{pt3dadd(193824.000000,174216.000000,77725.000000,5.434490)}
{pt3dadd(193656.000000,174084.000000,77525.000000,5.374770)}

{create adhoc16}
{access adhoc16}
{connect adhoc16(1), adhoc6(0)}
{nseg = 1}
{strdef color color = "White"}
{pt3dclear()}
{pt3dadd(197472.000000,175680.000000,83250.000000,82.809190)}
{pt3dadd(197496.000000,175368.000000,83200.000000,50.185513)}
{pt3dadd(197532.000000,175176.000000,83350.000000,30.711308)}
{pt3dadd(197676.000000,174960.000000,83225.000000,23.733868)}
{pt3dadd(197736.000000,174804.000000,83300.000000,10.784398)}
{pt3dadd(197736.000000,174636.000000,83400.000000,10.784398)}
{pt3dadd(197940.000000,174456.000000,83425.000000,10.784398)}
{pt3dadd(197964.000000,174276.000000,83450.000000,18.471396)}
{pt3dadd(197952.000000,174108.000000,83500.000000,9.186998)}
{pt3dadd(197940.000000,173940.000000,83550.000000,9.186998)}
{pt3dadd(198012.000000,173772.000000,83575.000000,9.186998)}
{pt3dadd(198084.000000,173592.000000,83600.000000,14.211663)}
{pt3dadd(198084.000000,173400.000000,83475.000000,6.524665)}
{pt3dadd(198180.000000,173196.000000,83475.000000,6.524665)}
{pt3dadd(198168.000000,173016.000000,83525.000000,6.524665)}
{pt3dadd(198192.000000,172824.000000,83500.000000,12.880497)}
{pt3dadd(198252.000000,172620.000000,83400.000000,7.855832)}
{pt3dadd(198312.000000,172440.000000,83375.000000,7.855832)}
{pt3dadd(198312.000000,172236.000000,83325.000000,7.855832)}
{pt3dadd(198312.000000,172044.000000,83275.000000,14.211664)}
{pt3dadd(198312.000000,171864.000000,83225.000000,7.855832)}
{pt3dadd(198336.000000,171648.000000,83250.000000,7.855832)}
{pt3dadd(198432.000000,171480.000000,83150.000000,7.855832)}
{pt3dadd(198492.000000,171312.000000,83125.000000,14.211664)}
{pt3dadd(198408.000000,171132.000000,83075.000000,7.855832)}
{pt3dadd(198576.000000,170856.000000,83050.000000,7.855832)}
{pt3dadd(198672.000000,170652.000000,83025.000000,7.855832)}
{pt3dadd(198768.000000,170472.000000,83000.000000,17.140230)}
{pt3dadd(198840.000000,170292.000000,83000.000000,10.784398)}
{pt3dadd(198912.000000,170160.000000,83000.000000,10.784398)}
{pt3dadd(198912.000000,170016.000000,83000.000000,10.784398)}
{pt3dadd(198912.000000,169884.000000,83000.000000,19.685420)}
{pt3dadd(198912.000000,169740.000000,83000.000000,10.401022)}
{pt3dadd(198840.000000,169596.000000,83175.000000,10.401022)}
{pt3dadd(198840.000000,169428.000000,83150.000000,10.401022)}
{pt3dadd(198900.000000,169248.000000,83175.000000,19.302044)}
{pt3dadd(198972.000000,169080.000000,83200.000000,10.401022)}
{pt3dadd(198996.000000,168864.000000,83250.000000,19.302044)}
{pt3dadd(198996.000000,168648.000000,83300.000000,28.586442)}
{pt3dadd(198960.000000,168444.000000,83400.000000,31.809033)}
{pt3dadd(198960.000000,168312.000000,83500.000000,47.921990)}

{create adhoc17}
{access adhoc17}
{connect adhoc17(1), adhoc16(0)}
{nseg = 1}
{strdef color color = "White"}
{pt3dclear()}
{pt3dadd(198960.000000,168312.000000,83500.000000,47.921990)}
{pt3dadd(198336.000000,168312.000000,82300.000000,20.932046)}
{pt3dadd(198336.000000,168180.000000,82000.000000,13.159227)}
{pt3dadd(198252.000000,168012.000000,81850.000000,6.249659)}
{pt3dadd(197988.000000,167880.000000,81450.000000,3.874829)}
{pt3dadd(197736.000000,167772.000000,80975.000000,3.874829)}
{pt3dadd(197604.000000,167760.000000,80775.000000,5.122763)}
{pt3dadd(197388.000000,167844.000000,80575.000000,9.444869)}
{pt3dadd(197244.000000,167928.000000,80375.000000,10.783399)}
{pt3dadd(197088.000000,167904.000000,79850.000000,23.110527)}

{create adhoc18}
{access adhoc18}
{connect adhoc18(1), adhoc16(0)}
{nseg = 1}
{strdef color color = "White"}
{pt3dclear()}
{pt3dadd(198960.000000,168312.000000,83500.000000,47.921990)}
{pt3dadd(199140.000000,168108.000000,83600.000000,31.809033)}
{pt3dadd(199140.000000,167916.000000,83700.000000,19.685420)}
{pt3dadd(199092.000000,167724.000000,83825.000000,19.302044)}
{pt3dadd(199044.000000,167544.000000,83925.000000,19.685420)}
{pt3dadd(199068.000000,167388.000000,84000.000000,31.809033)}
{pt3dadd(198984.000000,167208.000000,84100.000000,47.921990)}

{create adhoc19}
{access adhoc19}
{connect adhoc19(1), adhoc18(0)}
{nseg = 1}
{strdef color color = "White"}
{pt3dclear()}
{pt3dadd(198984.000000,167208.000000,84100.000000,47.921990)}
{pt3dadd(198432.000000,167208.000000,85400.000000,19.915495)}
{pt3dadd(198300.000000,167208.000000,85625.000000,6.521388)}
{pt3dadd(198156.000000,167328.000000,85875.000000,7.739669)}

{create adhoc20}
{access adhoc20}
{connect adhoc20(1), adhoc19(0)}
{nseg = 1}
{strdef color color = "White"}
{pt3dclear()}
{pt3dadd(198156.000000,167328.000000,85875.000000,7.739669)}
{pt3dadd(197916.000000,167316.000000,86025.000000,5.229798)}
{pt3dadd(197820.000000,167412.000000,86250.000000,3.737879)}
{pt3dadd(197748.000000,167532.000000,86500.000000,4.047465)}
{pt3dadd(197784.000000,167580.000000,86800.000000,3.057520)}
{pt3dadd(197820.000000,167712.000000,87100.000000,4.305454)}
{pt3dadd(197676.000000,167844.000000,87325.000000,5.295399)}
{pt3dadd(197628.000000,168072.000000,87550.000000,5.229798)}
{pt3dadd(197544.000000,168180.000000,87775.000000,6.449724)}

{create adhoc21}
{access adhoc21}
{connect adhoc21(1), adhoc19(0)}
{nseg = 1}
{strdef color color = "White"}
{pt3dclear()}
{pt3dadd(198156.000000,167328.000000,85875.000000,7.739669)}
{pt3dadd(198576.000000,167352.000000,85875.000000,5.864471)}
{pt3dadd(198720.000000,167316.000000,85975.000000,4.478975)}

{create adhoc22}
{access adhoc22}
{connect adhoc22(1), adhoc18(0)}
{nseg = 1}
{strdef color color = "White"}
{pt3dclear()}
{pt3dadd(198984.000000,167208.000000,84100.000000,47.921990)}
{pt3dadd(199128.000000,167028.000000,84025.000000,29.785660)}
{pt3dadd(199128.000000,166788.000000,84025.000000,18.471396)}
{pt3dadd(199128.000000,166584.000000,84025.000000,16.554516)}
{pt3dadd(199164.000000,166392.000000,84050.000000,8.867518)}
{pt3dadd(199200.000000,166188.000000,84075.000000,8.867518)}
{pt3dadd(199236.000000,166008.000000,84025.000000,8.867518)}
{pt3dadd(199296.000000,165780.000000,84000.000000,15.223350)}
{pt3dadd(199392.000000,165612.000000,84025.000000,7.855832)}
{pt3dadd(199536.000000,165432.000000,84125.000000,7.855832)}
{pt3dadd(199644.000000,165228.000000,84275.000000,7.855832)}
{pt3dadd(199740.000000,165024.000000,84425.000000,14.211664)}
{pt3dadd(199776.000000,164844.000000,84475.000000,7.855832)}
{pt3dadd(199800.000000,164688.000000,84500.000000,7.855832)}
{pt3dadd(199836.000000,164508.000000,84600.000000,7.855832)}
{pt3dadd(199836.000000,164316.000000,84700.000000,15.542830)}
{pt3dadd(199800.000000,164112.000000,84650.000000,9.186998)}
{pt3dadd(199860.000000,163908.000000,84625.000000,9.186998)}
{pt3dadd(199848.000000,163692.000000,84650.000000,9.186998)}
{pt3dadd(199836.000000,163524.000000,84675.000000,16.873996)}
{pt3dadd(199824.000000,163380.000000,84700.000000,9.186998)}
{pt3dadd(199860.000000,163176.000000,84800.000000,9.186998)}
{pt3dadd(199968.000000,162972.000000,84775.000000,9.186998)}
{pt3dadd(199932.000000,162756.000000,84850.000000,18.471396)}
{pt3dadd(199920.000000,162564.000000,84900.000000,10.784398)}
{pt3dadd(199836.000000,162348.000000,84625.000000,18.471396)}
{pt3dadd(199800.000000,162156.000000,84525.000000,26.158394)}
{pt3dadd(199800.000000,161952.000000,84550.000000,27.123327)}
{pt3dadd(199800.000000,161796.000000,84575.000000,39.934990)}

{create adhoc23}
{access adhoc23}
{connect adhoc23(1), adhoc22(0)}
{nseg = 1}
{strdef color color = "White"}
{pt3dclear()}
{pt3dadd(199800.000000,161796.000000,84575.000000,39.934990)}
{pt3dadd(198504.000000,161796.000000,84250.000000,16.907531)}
{pt3dadd(198312.000000,161832.000000,84000.000000,10.744518)}
{pt3dadd(198180.000000,161748.000000,83825.000000,3.995867)}
{pt3dadd(198072.000000,161604.000000,83800.000000,3.428292)}
{pt3dadd(197976.000000,161460.000000,83725.000000,4.203246)}
{pt3dadd(197868.000000,161376.000000,83625.000000,6.005410)}
{pt3dadd(197760.000000,161340.000000,83525.000000,5.374770)}

{create adhoc24}
{access adhoc24}
{connect adhoc24(1), adhoc22(0)}
{nseg = 1}
{strdef color color = "White"}
{pt3dclear()}
{pt3dadd(199800.000000,161796.000000,84575.000000,39.934990)}
{pt3dadd(200052.000000,161580.000000,84675.000000,29.146700)}
{pt3dadd(200196.000000,161388.000000,84800.000000,18.088020)}
{pt3dadd(200256.000000,161208.000000,84975.000000,19.685420)}
{pt3dadd(200328.000000,161040.000000,85125.000000,10.784398)}
{pt3dadd(200364.000000,160860.000000,85075.000000,10.784398)}
{pt3dadd(200424.000000,160620.000000,85075.000000,20.068796)}
{pt3dadd(200484.000000,160416.000000,85075.000000,29.353194)}
{pt3dadd(200448.000000,160224.000000,85175.000000,32.447993)}
{pt3dadd(200412.000000,160116.000000,85275.000000,47.921990)}

{create adhoc25}
{access adhoc25}
{connect adhoc25(1), adhoc24(0)}
{nseg = 1}
{strdef color color = "White"}
{pt3dclear()}
{pt3dadd(200412.000000,160116.000000,85275.000000,47.921990)}
{pt3dadd(199596.000000,160116.000000,86275.000000,18.623905)}
{pt3dadd(199428.000000,160116.000000,86400.000000,11.774343)}
{pt3dadd(199092.000000,160200.000000,86525.000000,3.264899)}
{pt3dadd(198672.000000,160164.000000,86425.000000,3.049908)}
{pt3dadd(198444.000000,160176.000000,86350.000000,3.824862)}
{pt3dadd(198312.000000,160212.000000,86325.000000,5.374770)}
{pt3dadd(198192.000000,160332.000000,86200.000000,5.374770)}

{create adhoc26}
{access adhoc26}
{connect adhoc26(1), adhoc24(0)}
{nseg = 1}
{strdef color color = "White"}
{pt3dclear()}
{pt3dadd(200412.000000,160116.000000,85275.000000,47.921990)}
{pt3dadd(200448.000000,159936.000000,85350.000000,32.447993)}
{pt3dadd(200472.000000,159756.000000,85350.000000,20.068796)}
{pt3dadd(200532.000000,159576.000000,85375.000000,20.068796)}
{pt3dadd(200484.000000,159384.000000,85350.000000,10.784398)}
{pt3dadd(200520.000000,159192.000000,85300.000000,10.784398)}
{pt3dadd(200544.000000,159000.000000,85325.000000,10.784398)}
{pt3dadd(200568.000000,158796.000000,85375.000000,20.068796)}
{pt3dadd(200580.000000,158592.000000,85500.000000,10.784398)}
{pt3dadd(200592.000000,158412.000000,85625.000000,10.784398)}
{pt3dadd(200640.000000,158220.000000,85600.000000,18.151917)}
{pt3dadd(200724.000000,158016.000000,85650.000000,25.838915)}
{pt3dadd(200808.000000,157824.000000,85700.000000,26.590861)}
{pt3dadd(200880.000000,157680.000000,85750.000000,39.934990)}

{create adhoc27}
{access adhoc27}
{connect adhoc27(1), adhoc26(0)}
{nseg = 1}
{strdef color color = "White"}
{pt3dclear()}
{pt3dadd(200880.000000,157680.000000,85750.000000,39.934990)}
{pt3dadd(199992.000000,157680.000000,85300.000000,20.231254)}
{pt3dadd(199656.000000,156984.000000,85400.000000,12.738752)}
{pt3dadd(199572.000000,156780.000000,85275.000000,8.603509)}
{pt3dadd(199476.000000,156420.000000,85125.000000,5.051754)}
{pt3dadd(199452.000000,156084.000000,85075.000000,9.373860)}
{pt3dadd(199332.000000,155772.000000,84850.000000,13.695965)}
{pt3dadd(199248.000000,155496.000000,84675.000000,15.907018)}
{pt3dadd(199188.000000,155292.000000,84475.000000,23.110527)}

{create adhoc28}
{access adhoc28}
{connect adhoc28(1), adhoc27(0)}
{nseg = 1}
{strdef color color = "White"}
{pt3dclear()}
{pt3dadd(199188.000000,155292.000000,84475.000000,23.110527)}
{pt3dadd(199056.000000,154980.000000,84350.000000,15.907018)}
{pt3dadd(199032.000000,154608.000000,84300.000000,10.144211)}
{pt3dadd(199092.000000,154248.000000,84150.000000,9.373860)}
{pt3dadd(199032.000000,153960.000000,83975.000000,5.051754)}
{pt3dadd(199032.000000,153636.000000,83775.000000,5.051754)}
{pt3dadd(199068.000000,153348.000000,83575.000000,5.051754)}
{pt3dadd(199020.000000,153096.000000,83525.000000,9.373860)}
{pt3dadd(199056.000000,152880.000000,83275.000000,5.822105)}
{pt3dadd(199044.000000,152676.000000,83225.000000,5.822105)}
{pt3dadd(199008.000000,152472.000000,83075.000000,5.822105)}
{pt3dadd(198972.000000,152292.000000,82925.000000,9.959327)}
{pt3dadd(198900.000000,152136.000000,82900.000000,5.637221)}
{pt3dadd(198900.000000,151944.000000,82850.000000,5.637221)}
{pt3dadd(198948.000000,151764.000000,82625.000000,5.637221)}
{pt3dadd(198972.000000,151596.000000,82375.000000,11.993053)}
{pt3dadd(198984.000000,151392.000000,82075.000000,7.855832)}
{pt3dadd(198996.000000,151224.000000,81825.000000,7.855832)}
{pt3dadd(198852.000000,151044.000000,81700.000000,7.855832)}
{pt3dadd(198744.000000,150912.000000,81425.000000,11.407586)}
{pt3dadd(198708.000000,150888.000000,81150.000000,5.051754)}
{pt3dadd(198444.000000,150744.000000,80925.000000,5.051754)}
{pt3dadd(198264.000000,150600.000000,80750.000000,5.051754)}
{pt3dadd(198120.000000,150480.000000,80500.000000,8.603509)}
{pt3dadd(197952.000000,150408.000000,80250.000000,5.051754)}
{pt3dadd(197784.000000,150324.000000,80125.000000,5.051754)}
{pt3dadd(197616.000000,150240.000000,79975.000000,5.051754)}
{pt3dadd(197448.000000,150156.000000,79825.000000,9.373860)}
{pt3dadd(197328.000000,150048.000000,79725.000000,10.144211)}
{pt3dadd(197196.000000,150000.000000,79550.000000,15.390737)}
{pt3dadd(197040.000000,149952.000000,79450.000000,24.651229)}
{pt3dadd(196884.000000,149928.000000,79150.000000,27.732632)}

{create adhoc29}
{access adhoc29}
{connect adhoc29(1), adhoc28(0)}
{nseg = 1}
{strdef color color = "White"}
{pt3dclear()}
{pt3dadd(196884.000000,149928.000000,79150.000000,27.732632)}
{pt3dadd(196704.000000,149892.000000,78900.000000,18.988421)}
{pt3dadd(196548.000000,149868.000000,78675.000000,11.993053)}
{pt3dadd(196368.000000,149940.000000,78325.000000,13.102358)}
{pt3dadd(196188.000000,150000.000000,77925.000000,7.855832)}
{pt3dadd(195912.000000,150216.000000,77250.000000,7.855832)}
{pt3dadd(195756.000000,150324.000000,77000.000000,7.855832)}
{pt3dadd(195696.000000,150348.000000,76750.000000,12.177937)}
{pt3dadd(195576.000000,150384.000000,76475.000000,5.822105)}
{pt3dadd(195348.000000,150492.000000,76225.000000,5.822105)}
{pt3dadd(195240.000000,150552.000000,75950.000000,5.822105)}
{pt3dadd(195048.000000,150672.000000,75675.000000,10.144211)}
{pt3dadd(195072.000000,150888.000000,75350.000000,10.846771)}
{pt3dadd(195072.000000,151116.000000,75075.000000,15.168876)}
{pt3dadd(194988.000000,151068.000000,74800.000000,24.281460)}
{pt3dadd(194892.000000,151056.000000,74625.000000,23.110527)}

{create adhoc30}
{access adhoc30}
{connect adhoc30(1), adhoc29(0)}
{nseg = 1}
{strdef color color = "White"}
{pt3dclear()}
{pt3dadd(194892.000000,151056.000000,74625.000000,23.110527)}
{pt3dadd(194712.000000,151104.000000,74375.000000,15.303064)}
{pt3dadd(194628.000000,151008.000000,74125.000000,9.781838)}
{pt3dadd(194580.000000,150888.000000,73850.000000,9.781838)}
{pt3dadd(194532.000000,150816.000000,73550.000000,5.822105)}
{pt3dadd(194400.000000,150708.000000,73250.000000,8.196935)}
{pt3dadd(194460.000000,150480.000000,72900.000000,10.036798)}
{pt3dadd(194496.000000,150240.000000,72575.000000,8.524488)}
{pt3dadd(194556.000000,150096.000000,72375.000000,10.699318)}

{create adhoc31}
{access adhoc31}
{connect adhoc31(1), adhoc30(0)}
{nseg = 1}
{strdef color color = "White"}
{pt3dclear()}
{pt3dadd(194556.000000,150096.000000,72375.000000,10.699318)}
{pt3dadd(194712.000000,150732.000000,72125.000000,8.346167)}
{pt3dadd(194856.000000,151044.000000,72125.000000,7.193440)}
{pt3dadd(194928.000000,151332.000000,72125.000000,4.142900)}
{pt3dadd(195048.000000,151524.000000,72125.000000,4.478975)}

{create adhoc32}
{access adhoc32}
{connect adhoc32(1), adhoc30(0)}
{nseg = 1}
{strdef color color = "White"}
{pt3dclear()}
{pt3dadd(194556.000000,150096.000000,72375.000000,10.699318)}
{pt3dadd(194580.000000,149952.000000,72275.000000,8.524488)}
{pt3dadd(194616.000000,149796.000000,72400.000000,5.714693)}
{pt3dadd(194580.000000,149640.000000,72450.000000,5.803854)}
{pt3dadd(194640.000000,149400.000000,72275.000000,3.429025)}
{pt3dadd(194748.000000,149028.000000,72300.000000,3.429025)}
{pt3dadd(194772.000000,148884.000000,72275.000000,3.429025)}
{pt3dadd(194736.000000,148740.000000,72175.000000,5.358049)}
{pt3dadd(194868.000000,148596.000000,72025.000000,3.429025)}
{pt3dadd(195036.000000,148440.000000,72050.000000,3.429025)}
{pt3dadd(195024.000000,148284.000000,71950.000000,3.429025)}
{pt3dadd(195180.000000,148140.000000,71925.000000,5.803854)}
{pt3dadd(195216.000000,147912.000000,72100.000000,4.470624)}
{pt3dadd(195072.000000,147756.000000,71775.000000,6.451041)}
{pt3dadd(194928.000000,147636.000000,71500.000000,4.478975)}

{create adhoc33}
{access adhoc33}
{connect adhoc33(1), adhoc29(0)}
{nseg = 1}
{strdef color color = "White"}
{pt3dclear()}
{pt3dadd(194892.000000,151056.000000,74625.000000,23.110527)}
{pt3dadd(195420.000000,151080.000000,74625.000000,9.287602)}

{create adhoc34}
{access adhoc34}
{connect adhoc34(1), adhoc28(0)}
{nseg = 1}
{strdef color color = "White"}
{pt3dclear()}
{pt3dadd(196884.000000,149928.000000,79150.000000,27.732632)}
{pt3dadd(196848.000000,149604.000000,79725.000000,11.981362)}
{pt3dadd(196788.000000,149460.000000,79750.000000,4.478975)}

{create adhoc35}
{access adhoc35}
{connect adhoc35(1), adhoc27(0)}
{nseg = 1}
{strdef color color = "White"}
{pt3dclear()}
{pt3dadd(199188.000000,155292.000000,84475.000000,23.110527)}
{pt3dadd(198384.000000,155292.000000,83625.000000,12.661558)}
{pt3dadd(198180.000000,155292.000000,83400.000000,8.196935)}
{pt3dadd(197976.000000,155412.000000,83175.000000,5.432350)}
{pt3dadd(197652.000000,155460.000000,82950.000000,3.057520)}
{pt3dadd(197268.000000,155364.000000,82525.000000,3.057520)}
{pt3dadd(197028.000000,155232.000000,82200.000000,3.057520)}
{pt3dadd(196776.000000,155256.000000,81875.000000,4.986545)}
{pt3dadd(196704.000000,155556.000000,81400.000000,3.429025)}
{pt3dadd(197004.000000,155784.000000,81175.000000,3.429025)}
{pt3dadd(197088.000000,155820.000000,80900.000000,3.429025)}
{pt3dadd(197184.000000,156072.000000,80700.000000,4.024820)}
{pt3dadd(197220.000000,156312.000000,80500.000000,2.827751)}
{pt3dadd(197496.000000,156624.000000,80275.000000,3.712918)}
{pt3dadd(197640.000000,156840.000000,80175.000000,5.159780)}

{create adhoc36}
{access adhoc36}
{connect adhoc36(1), adhoc26(0)}
{nseg = 1}
{strdef color color = "White"}
{pt3dclear()}
{pt3dadd(200880.000000,157680.000000,85750.000000,39.934990)}
{pt3dadd(200904.000000,157488.000000,85825.000000,27.123327)}
{pt3dadd(200988.000000,157296.000000,85900.000000,16.873996)}
{pt3dadd(201084.000000,157104.000000,86025.000000,14.433524)}
{pt3dadd(201168.000000,156912.000000,86250.000000,6.746526)}
{pt3dadd(201324.000000,156732.000000,86550.000000,6.746526)}
{pt3dadd(201408.000000,156552.000000,86625.000000,6.746526)}
{pt3dadd(201540.000000,156396.000000,86925.000000,16.030924)}
{pt3dadd(201564.000000,156168.000000,87150.000000,10.784398)}
{pt3dadd(201528.000000,155940.000000,87325.000000,10.784398)}
{pt3dadd(201456.000000,155724.000000,87375.000000,10.784398)}
{pt3dadd(201528.000000,155436.000000,87425.000000,20.068796)}
{pt3dadd(201456.000000,155232.000000,87700.000000,10.784398)}
{pt3dadd(201456.000000,155028.000000,87700.000000,10.784398)}
{pt3dadd(201468.000000,154800.000000,87750.000000,10.784398)}
{pt3dadd(201528.000000,154644.000000,87825.000000,18.151917)}
{pt3dadd(201624.000000,154452.000000,87950.000000,8.867519)}
{pt3dadd(201720.000000,154248.000000,88100.000000,8.867519)}
{pt3dadd(201816.000000,154044.000000,88250.000000,17.768541)}
{pt3dadd(201828.000000,153828.000000,88250.000000,26.669563)}
{pt3dadd(201876.000000,153636.000000,88325.000000,31.170073)}
{pt3dadd(201924.000000,153432.000000,88400.000000,46.005110)}

{create adhoc37}
{access adhoc37}
{connect adhoc37(1), adhoc36(0)}
{nseg = 1}
{strdef color color = "White"}
{pt3dclear()}
{pt3dadd(201924.000000,153432.000000,88400.000000,46.005110)}
{pt3dadd(201072.000000,153372.000000,88525.000000,18.619618)}
{pt3dadd(200928.000000,153324.000000,88525.000000,5.374770)}

{create adhoc38}
{access adhoc38}
{connect adhoc38(1), adhoc36(0)}
{nseg = 1}
{strdef color color = "White"}
{pt3dclear()}
{pt3dadd(201924.000000,153432.000000,88400.000000,46.005110)}
{pt3dadd(201936.000000,153204.000000,88525.000000,29.146700)}
{pt3dadd(201936.000000,153036.000000,88500.000000,18.088020)}
{pt3dadd(202080.000000,152868.000000,88575.000000,16.873996)}
{pt3dadd(202092.000000,152688.000000,88550.000000,9.186998)}
{pt3dadd(202164.000000,152472.000000,88650.000000,9.186998)}
{pt3dadd(202224.000000,152280.000000,88650.000000,9.186998)}
{pt3dadd(202284.000000,152076.000000,88650.000000,15.542830)}
{pt3dadd(202248.000000,151884.000000,88650.000000,7.855832)}
{pt3dadd(202224.000000,151716.000000,88650.000000,7.855832)}
{pt3dadd(202200.000000,151536.000000,88650.000000,7.855832)}
{pt3dadd(202176.000000,151380.000000,88700.000000,13.945430)}
{pt3dadd(202164.000000,151188.000000,88800.000000,7.589598)}
{pt3dadd(202128.000000,150984.000000,88775.000000,7.589598)}
{pt3dadd(202092.000000,150792.000000,88750.000000,13.945430)}
{pt3dadd(202056.000000,150648.000000,88725.000000,18.970096)}
{pt3dadd(202032.000000,150444.000000,88725.000000,20.467496)}
{pt3dadd(202020.000000,150240.000000,88825.000000,26.623327)}

{create adhoc39}
{access adhoc39}
{connect adhoc39(1), adhoc38(0)}
{nseg = 1}
{strdef color color = "White"}
{pt3dclear()}
{pt3dadd(202020.000000,150240.000000,88825.000000,26.623327)}
{pt3dadd(201708.000000,150240.000000,89625.000000,12.268510)}
{pt3dadd(201540.000000,150240.000000,89850.000000,5.185658)}
{pt3dadd(201480.000000,150240.000000,89950.000000,5.374770)}

{create adhoc40}
{access adhoc40}
{connect adhoc40(1), adhoc38(0)}
{nseg = 1}
{strdef color color = "White"}
{pt3dclear()}
{pt3dadd(202020.000000,150240.000000,88825.000000,26.623327)}
{pt3dadd(202032.000000,150048.000000,88875.000000,18.248885)}
{pt3dadd(202080.000000,149856.000000,88825.000000,11.549331)}
{pt3dadd(202056.000000,149652.000000,88800.000000,12.880497)}
{pt3dadd(202044.000000,149448.000000,88825.000000,7.855832)}
{pt3dadd(202032.000000,149256.000000,88850.000000,7.855832)}
{pt3dadd(202020.000000,149076.000000,88875.000000,7.855832)}
{pt3dadd(202008.000000,148920.000000,88900.000000,13.945430)}
{pt3dadd(201996.000000,148740.000000,88925.000000,7.589598)}
{pt3dadd(202020.000000,148548.000000,88900.000000,7.589598)}
{pt3dadd(202068.000000,148356.000000,88950.000000,7.589598)}
{pt3dadd(202104.000000,148152.000000,89075.000000,14.957117)}
{pt3dadd(202116.000000,147948.000000,89125.000000,8.867519)}
{pt3dadd(202152.000000,147708.000000,89200.000000,16.235037)}
{pt3dadd(202188.000000,147516.000000,89425.000000,23.922035)}
{pt3dadd(202212.000000,147348.000000,89500.000000,26.590861)}
{pt3dadd(202236.000000,147240.000000,89550.000000,39.934990)}

{create adhoc41}
{access adhoc41}
{connect adhoc41(1), adhoc40(0)}
{nseg = 1}
{strdef color color = "White"}
{pt3dclear()}
{pt3dadd(202236.000000,147240.000000,89550.000000,39.934990)}
{pt3dadd(201732.000000,147240.000000,88075.000000,17.526704)}
{pt3dadd(201648.000000,147048.000000,87875.000000,11.116023)}
{pt3dadd(201600.000000,146928.000000,87875.000000,3.988988)}
{pt3dadd(201600.000000,146964.000000,87725.000000,2.059963)}
{pt3dadd(201576.000000,146832.000000,87525.000000,2.059963)}
{pt3dadd(201516.000000,146712.000000,87425.000000,2.059963)}
{pt3dadd(201372.000000,146592.000000,87375.000000,3.899827)}
{pt3dadd(201204.000000,146436.000000,87325.000000,3.339864)}
{pt3dadd(200868.000000,146124.000000,87350.000000,5.714693)}
{pt3dadd(200616.000000,145740.000000,87275.000000,8.089522)}
{pt3dadd(200340.000000,145392.000000,87375.000000,9.416098)}
{pt3dadd(200136.000000,145020.000000,87225.000000,13.374147)}

{create adhoc42}
{access adhoc42}
{connect adhoc42(1), adhoc40(0)}
{nseg = 1}
{strdef color color = "White"}
{pt3dclear()}
{pt3dadd(202236.000000,147240.000000,89550.000000,39.934990)}
{pt3dadd(202200.000000,147084.000000,89600.000000,26.590861)}
{pt3dadd(202236.000000,146880.000000,89725.000000,16.554517)}
{pt3dadd(202224.000000,146664.000000,89850.000000,16.554517)}
{pt3dadd(202200.000000,146412.000000,90000.000000,9.186998)}
{pt3dadd(202176.000000,146196.000000,90025.000000,9.186998)}
{pt3dadd(202116.000000,145992.000000,90150.000000,9.186998)}
{pt3dadd(202020.000000,145776.000000,90225.000000,15.542830)}
{pt3dadd(201972.000000,145584.000000,90175.000000,7.855832)}
{pt3dadd(201888.000000,145368.000000,90250.000000,7.855832)}
{pt3dadd(201804.000000,145164.000000,90350.000000,7.855832)}
{pt3dadd(201720.000000,144960.000000,90300.000000,14.211664)}
{pt3dadd(201660.000000,144780.000000,90250.000000,7.855832)}
{pt3dadd(201612.000000,144600.000000,90175.000000,7.855832)}
{pt3dadd(201564.000000,144396.000000,90150.000000,7.855832)}
{pt3dadd(201612.000000,144156.000000,90250.000000,15.542830)}
{pt3dadd(201564.000000,143928.000000,90300.000000,9.186998)}
{pt3dadd(201396.000000,143688.000000,90325.000000,9.186998)}
{pt3dadd(201324.000000,143496.000000,90300.000000,9.186998)}
{pt3dadd(201348.000000,143292.000000,90250.000000,15.542830)}
{pt3dadd(201324.000000,143076.000000,90225.000000,7.855832)}
{pt3dadd(201228.000000,142824.000000,90250.000000,7.855832)}
{pt3dadd(201180.000000,142644.000000,90250.000000,7.855832)}
{pt3dadd(201144.000000,142428.000000,90175.000000,13.102358)}
{pt3dadd(201084.000000,142224.000000,90125.000000,6.746526)}
{pt3dadd(201108.000000,141996.000000,90150.000000,6.746526)}
{pt3dadd(201132.000000,141804.000000,90175.000000,6.746526)}
{pt3dadd(201012.000000,141588.000000,90200.000000,11.993053)}
{pt3dadd(201000.000000,141372.000000,90225.000000,6.746526)}
{pt3dadd(201048.000000,141156.000000,90175.000000,6.746526)}
{pt3dadd(201084.000000,140952.000000,90150.000000,6.746526)}
{pt3dadd(201120.000000,140748.000000,90150.000000,13.102358)}
{pt3dadd(201120.000000,140556.000000,90125.000000,7.855832)}
{pt3dadd(201120.000000,140388.000000,90100.000000,7.855832)}
{pt3dadd(201120.000000,140220.000000,90125.000000,7.855832)}
{pt3dadd(201144.000000,140052.000000,90150.000000,13.945430)}
{pt3dadd(201204.000000,139836.000000,90100.000000,7.589598)}
{pt3dadd(201264.000000,139632.000000,90075.000000,7.589598)}
{pt3dadd(201288.000000,139452.000000,90075.000000,7.589598)}
{pt3dadd(201132.000000,139260.000000,90125.000000,14.957117)}
{pt3dadd(201168.000000,138996.000000,90150.000000,8.867519)}
{pt3dadd(201180.000000,138792.000000,90150.000000,8.867519)}
{pt3dadd(201216.000000,138588.000000,90100.000000,8.867519)}
{pt3dadd(201168.000000,138432.000000,90100.000000,15.223351)}
{pt3dadd(201060.000000,138252.000000,90125.000000,7.855832)}
{pt3dadd(200976.000000,138072.000000,90150.000000,7.855832)}
{pt3dadd(200964.000000,137928.000000,90225.000000,7.855832)}
{pt3dadd(200940.000000,137772.000000,90250.000000,14.211664)}
{pt3dadd(200892.000000,137592.000000,90325.000000,13.102358)}
{pt3dadd(200796.000000,137388.000000,90375.000000,20.837264)}
{pt3dadd(200856.000000,137268.000000,90225.000000,27.732632)}

{create adhoc43}
{access adhoc43}
{connect adhoc43(1), adhoc42(0)}
{nseg = 1}
{strdef color color = "White"}
{pt3dclear()}
{pt3dadd(200856.000000,137268.000000,90225.000000,27.732632)}
{pt3dadd(200556.000000,137268.000000,91275.000000,17.447720)}
{pt3dadd(200556.000000,137076.000000,91475.000000,11.068632)}
{pt3dadd(200496.000000,136908.000000,91475.000000,8.196935)}
{pt3dadd(200472.000000,136704.000000,91600.000000,3.874829)}
{pt3dadd(200424.000000,136524.000000,91625.000000,3.874829)}
{pt3dadd(200316.000000,136308.000000,91700.000000,3.874829)}
{pt3dadd(200232.000000,136128.000000,91800.000000,6.784625)}
{pt3dadd(200220.000000,135960.000000,91975.000000,4.409795)}
{pt3dadd(200184.000000,135816.000000,92025.000000,4.409795)}
{pt3dadd(200076.000000,135576.000000,92125.000000,4.409795)}
{pt3dadd(199920.000000,135408.000000,92300.000000,7.961550)}
{pt3dadd(199764.000000,135228.000000,92425.000000,5.051754)}
{pt3dadd(199680.000000,135000.000000,92425.000000,5.051754)}
{pt3dadd(199632.000000,134832.000000,92450.000000,5.051754)}
{pt3dadd(199584.000000,134628.000000,92475.000000,8.603509)}
{pt3dadd(199524.000000,134400.000000,92475.000000,5.051754)}
{pt3dadd(199380.000000,134148.000000,92425.000000,5.051754)}
{pt3dadd(199212.000000,133956.000000,92500.000000,5.051754)}
{pt3dadd(199248.000000,133680.000000,92525.000000,7.961550)}
{pt3dadd(199176.000000,133488.000000,92575.000000,4.409795)}
{pt3dadd(199104.000000,133296.000000,92625.000000,4.409795)}
{pt3dadd(199008.000000,133104.000000,92650.000000,4.409795)}
{pt3dadd(199008.000000,132912.000000,92600.000000,7.319591)}
{pt3dadd(198912.000000,132720.000000,92650.000000,6.784625)}
{pt3dadd(198720.000000,132504.000000,92600.000000,10.307708)}
{pt3dadd(198660.000000,132324.000000,92600.000000,13.374147)}

{create adhoc44}
{access adhoc44}
{connect adhoc44(1), adhoc43(0)}
{nseg = 1}
{strdef color color = "White"}
{pt3dclear()}
{pt3dadd(198660.000000,132324.000000,92600.000000,13.374147)}
{pt3dadd(198624.000000,132192.000000,92600.000000,11.377640)}
{pt3dadd(198564.000000,131988.000000,92625.000000,7.426584)}
{pt3dadd(198420.000000,131808.000000,92725.000000,7.961550)}
{pt3dadd(198492.000000,131616.000000,92775.000000,4.409795)}
{pt3dadd(198456.000000,131436.000000,92850.000000,4.409795)}
{pt3dadd(198480.000000,131244.000000,92875.000000,4.409795)}
{pt3dadd(198492.000000,131052.000000,92950.000000,7.319591)}
{pt3dadd(198480.000000,130836.000000,93075.000000,4.409795)}
{pt3dadd(198456.000000,130620.000000,93125.000000,4.409795)}
{pt3dadd(198384.000000,130428.000000,93225.000000,4.409795)}
{pt3dadd(198372.000000,130236.000000,93325.000000,7.319591)}
{pt3dadd(198384.000000,129996.000000,93450.000000,4.409795)}
{pt3dadd(198384.000000,129756.000000,93575.000000,4.409795)}
{pt3dadd(198240.000000,129588.000000,93625.000000,4.409795)}
{pt3dadd(198192.000000,129336.000000,93700.000000,7.319591)}
{pt3dadd(198084.000000,129024.000000,93775.000000,4.409795)}
{pt3dadd(197976.000000,128784.000000,93850.000000,4.409795)}
{pt3dadd(197928.000000,128592.000000,93875.000000,7.807480)}
{pt3dadd(197844.000000,128388.000000,93875.000000,11.359234)}
{pt3dadd(197796.000000,128220.000000,94100.000000,13.082398)}
{pt3dadd(197784.000000,128112.000000,94075.000000,19.258772)}

{create adhoc45}
{access adhoc45}
{connect adhoc45(1), adhoc44(0)}
{nseg = 1}
{strdef color color = "White"}
{pt3dclear()}
{pt3dadd(197784.000000,128112.000000,94075.000000,19.258772)}
{pt3dadd(197772.000000,127896.000000,94100.000000,12.269250)}
{pt3dadd(197628.000000,127668.000000,94050.000000,7.961550)}
{pt3dadd(197688.000000,127464.000000,94050.000000,6.338820)}
{pt3dadd(197724.000000,127260.000000,94075.000000,3.429025)}
{pt3dadd(197700.000000,127068.000000,94075.000000,3.429025)}
{pt3dadd(197652.000000,126864.000000,94100.000000,3.429025)}
{pt3dadd(197640.000000,126612.000000,94175.000000,6.338820)}
{pt3dadd(197640.000000,126420.000000,94225.000000,4.409795)}
{pt3dadd(197640.000000,126228.000000,94250.000000,4.409795)}
{pt3dadd(197628.000000,126012.000000,94250.000000,4.409795)}
{pt3dadd(197508.000000,125832.000000,94250.000000,8.731901)}
{pt3dadd(197424.000000,125664.000000,94275.000000,5.822105)}
{pt3dadd(197292.000000,125496.000000,94200.000000,5.822105)}
{pt3dadd(197280.000000,125316.000000,94250.000000,13.509103)}
{pt3dadd(197196.000000,125112.000000,94275.000000,16.418899)}
{pt3dadd(197112.000000,124860.000000,94300.000000,19.161322)}
{pt3dadd(197064.000000,124692.000000,94350.000000,16.048977)}

{create adhoc46}
{access adhoc46}
{connect adhoc46(1), adhoc45(0)}
{nseg = 1}
{strdef color color = "White"}
{pt3dclear()}
{pt3dadd(197064.000000,124692.000000,94350.000000,16.048977)}
{pt3dadd(196896.000000,124572.000000,94975.000000,10.307708)}
{pt3dadd(196800.000000,124608.000000,95275.000000,8.342145)}
{pt3dadd(196368.000000,124584.000000,95500.000000,6.207304)}
{pt3dadd(196056.000000,124452.000000,95675.000000,5.387457)}
{pt3dadd(195924.000000,124500.000000,95925.000000,5.374770)}

{create adhoc47}
{access adhoc47}
{connect adhoc47(1), adhoc45(0)}
{nseg = 1}
{strdef color color = "White"}
{pt3dclear()}
{pt3dadd(197064.000000,124692.000000,94350.000000,16.048977)}
{pt3dadd(197172.000000,124644.000000,93800.000000,8.945526)}
{pt3dadd(197124.000000,124536.000000,93550.000000,5.967316)}
{pt3dadd(197088.000000,124392.000000,93550.000000,4.305454)}
{pt3dadd(197028.000000,124236.000000,93500.000000,2.747934)}
{pt3dadd(196980.000000,124056.000000,93450.000000,2.747934)}
{pt3dadd(196920.000000,123876.000000,93450.000000,2.747934)}
{pt3dadd(196896.000000,123732.000000,93375.000000,3.737879)}
{pt3dadd(196836.000000,123588.000000,93275.000000,2.489945)}
{pt3dadd(196800.000000,123432.000000,93300.000000,2.489945)}
{pt3dadd(196668.000000,123276.000000,93250.000000,2.489945)}
{pt3dadd(196656.000000,123132.000000,93250.000000,3.737879)}
{pt3dadd(196608.000000,122976.000000,93150.000000,2.747934)}
{pt3dadd(196536.000000,122820.000000,93150.000000,2.747934)}
{pt3dadd(196488.000000,122664.000000,93075.000000,2.747934)}
{pt3dadd(196428.000000,122508.000000,93025.000000,5.122763)}
{pt3dadd(196356.000000,122352.000000,92950.000000,3.874829)}
{pt3dadd(196332.000000,122208.000000,92900.000000,3.874829)}
{pt3dadd(196188.000000,122040.000000,92800.000000,3.874829)}
{pt3dadd(196140.000000,121860.000000,92775.000000,6.784625)}
{pt3dadd(196092.000000,121692.000000,92700.000000,4.409795)}
{pt3dadd(196056.000000,121476.000000,92600.000000,4.409795)}
{pt3dadd(195780.000000,121272.000000,92500.000000,4.409795)}
{pt3dadd(195708.000000,121056.000000,92400.000000,5.348142)}
{pt3dadd(195588.000000,120852.000000,92400.000000,2.438347)}
{pt3dadd(195456.000000,120660.000000,92375.000000,2.438347)}
{pt3dadd(195276.000000,120468.000000,92175.000000,2.438347)}
{pt3dadd(195168.000000,120240.000000,92100.000000,4.367372)}
{pt3dadd(194988.000000,120036.000000,91900.000000,4.986545)}
{pt3dadd(194832.000000,119892.000000,91700.000000,6.544065)}
{pt3dadd(194712.000000,119772.000000,91675.000000,9.906776)}
{pt3dadd(194748.000000,119640.000000,91700.000000,9.287602)}

{create adhoc48}
{access adhoc48}
{connect adhoc48(1), adhoc47(0)}
{nseg = 1}
{strdef color color = "White"}
{pt3dclear()}
{pt3dadd(194748.000000,119640.000000,91700.000000,9.287602)}
{pt3dadd(194556.000000,119520.000000,91450.000000,6.607384)}
{pt3dadd(194412.000000,119172.000000,91325.000000,5.374770)}

{create adhoc49}
{access adhoc49}
{connect adhoc49(1), adhoc47(0)}
{nseg = 1}
{strdef color color = "White"}
{pt3dclear()}
{pt3dadd(194748.000000,119640.000000,91700.000000,9.287602)}
{pt3dadd(194580.000000,119892.000000,91450.000000,7.739669)}

{create adhoc50}
{access adhoc50}
{connect adhoc50(1), adhoc44(0)}
{nseg = 1}
{strdef color color = "White"}
{pt3dclear()}
{pt3dadd(197784.000000,128112.000000,94075.000000,19.258772)}
{pt3dadd(197748.000000,128244.000000,94475.000000,6.449724)}

{create adhoc51}
{access adhoc51}
{connect adhoc51(1), adhoc43(0)}
{nseg = 1}
{strdef color color = "White"}
{pt3dclear()}
{pt3dadd(198660.000000,132324.000000,92600.000000,13.374147)}
{pt3dadd(198516.000000,132432.000000,92225.000000,15.257425)}
{pt3dadd(198528.000000,132360.000000,92050.000000,13.895244)}
{pt3dadd(198552.000000,132336.000000,91925.000000,9.287602)}

{create adhoc52}
{access adhoc52}
{connect adhoc52(1), adhoc42(0)}
{nseg = 1}
{strdef color color = "White"}
{pt3dclear()}
{pt3dadd(200856.000000,137268.000000,90225.000000,27.732632)}
{pt3dadd(200736.000000,137124.000000,90025.000000,17.139580)}
{pt3dadd(200688.000000,136908.000000,89975.000000,10.883748)}
{pt3dadd(200640.000000,136800.000000,89925.000000,9.959327)}
{pt3dadd(200628.000000,136596.000000,89900.000000,5.822105)}
{pt3dadd(200616.000000,136416.000000,89875.000000,5.822105)}
{pt3dadd(200568.000000,136236.000000,89850.000000,5.822105)}
{pt3dadd(200604.000000,136032.000000,89775.000000,9.959327)}
{pt3dadd(200592.000000,135816.000000,89725.000000,5.637221)}
{pt3dadd(200556.000000,135612.000000,89625.000000,5.637221)}
{pt3dadd(200520.000000,135444.000000,89550.000000,5.637221)}
{pt3dadd(200508.000000,135264.000000,89575.000000,9.774442)}
{pt3dadd(200496.000000,135108.000000,89600.000000,5.637221)}
{pt3dadd(200508.000000,134904.000000,89575.000000,5.637221)}
{pt3dadd(200496.000000,134688.000000,89525.000000,5.637221)}
{pt3dadd(200448.000000,134472.000000,89425.000000,10.883748)}
{pt3dadd(200400.000000,134304.000000,89325.000000,6.746526)}
{pt3dadd(200376.000000,134100.000000,89275.000000,6.746526)}
{pt3dadd(200328.000000,133908.000000,89150.000000,6.746526)}
{pt3dadd(200268.000000,133752.000000,89025.000000,13.102358)}
{pt3dadd(200208.000000,133572.000000,88900.000000,7.855832)}
{pt3dadd(200208.000000,133284.000000,88750.000000,7.855832)}
{pt3dadd(200100.000000,132996.000000,88600.000000,7.855832)}
{pt3dadd(200076.000000,132792.000000,88450.000000,13.102358)}
{pt3dadd(200076.000000,132624.000000,88350.000000,6.746526)}
{pt3dadd(200028.000000,132444.000000,88150.000000,6.746526)}
{pt3dadd(199968.000000,132228.000000,88025.000000,6.746526)}
{pt3dadd(199884.000000,132000.000000,87875.000000,11.993053)}
{pt3dadd(199896.000000,131808.000000,87800.000000,6.746526)}
{pt3dadd(199884.000000,131604.000000,87825.000000,6.746526)}
{pt3dadd(199824.000000,131400.000000,87725.000000,6.746526)}
{pt3dadd(199800.000000,131220.000000,87625.000000,11.993053)}
{pt3dadd(199788.000000,130932.000000,87550.000000,6.746526)}
{pt3dadd(199692.000000,130656.000000,87375.000000,6.746526)}
{pt3dadd(199704.000000,130488.000000,87350.000000,6.746526)}
{pt3dadd(199596.000000,130308.000000,87300.000000,10.298281)}
{pt3dadd(199464.000000,130104.000000,87125.000000,5.051754)}
{pt3dadd(199368.000000,129924.000000,87000.000000,5.051754)}
{pt3dadd(199332.000000,129720.000000,86950.000000,5.051754)}
{pt3dadd(199308.000000,129540.000000,86875.000000,10.298281)}
{pt3dadd(199308.000000,129360.000000,86800.000000,6.746526)}
{pt3dadd(199296.000000,129204.000000,86750.000000,6.746526)}
{pt3dadd(199248.000000,129024.000000,86650.000000,6.746526)}
{pt3dadd(199176.000000,128856.000000,86600.000000,11.068632)}
{pt3dadd(199056.000000,128688.000000,86500.000000,5.822105)}
{pt3dadd(198996.000000,128484.000000,86400.000000,5.822105)}
{pt3dadd(198948.000000,128328.000000,86300.000000,5.822105)}
{pt3dadd(198876.000000,128100.000000,86275.000000,10.144211)}
{pt3dadd(198708.000000,127884.000000,86225.000000,5.822105)}
{pt3dadd(198564.000000,127668.000000,86200.000000,5.822105)}
{pt3dadd(198516.000000,127404.000000,86175.000000,5.822105)}
{pt3dadd(198504.000000,127176.000000,86125.000000,9.373860)}
{pt3dadd(198480.000000,127044.000000,86125.000000,5.051754)}
{pt3dadd(198432.000000,126924.000000,86150.000000,5.051754)}
{pt3dadd(198588.000000,126720.000000,86150.000000,5.051754)}
{pt3dadd(198696.000000,126516.000000,86125.000000,7.426584)}
{pt3dadd(198660.000000,126336.000000,86050.000000,3.874829)}
{pt3dadd(198588.000000,126168.000000,86025.000000,3.874829)}
{pt3dadd(198540.000000,125988.000000,86000.000000,3.874829)}
{pt3dadd(198528.000000,125808.000000,85950.000000,6.784625)}
{pt3dadd(198528.000000,125664.000000,85950.000000,4.409795)}
{pt3dadd(198528.000000,125520.000000,85925.000000,4.409795)}
{pt3dadd(198528.000000,125364.000000,85875.000000,4.409795)}
{pt3dadd(198456.000000,125184.000000,85800.000000,8.731901)}
{pt3dadd(198444.000000,124980.000000,85800.000000,5.822105)}
{pt3dadd(198420.000000,124764.000000,85625.000000,5.822105)}
{pt3dadd(198264.000000,124584.000000,85525.000000,5.822105)}
{pt3dadd(198216.000000,124380.000000,85475.000000,10.144211)}
{pt3dadd(198144.000000,124140.000000,85425.000000,5.822105)}
{pt3dadd(198156.000000,123948.000000,85325.000000,5.822105)}
{pt3dadd(198036.000000,123756.000000,85275.000000,5.822105)}
{pt3dadd(197952.000000,123516.000000,85275.000000,10.144211)}
{pt3dadd(197892.000000,123312.000000,85175.000000,5.822105)}
{pt3dadd(197748.000000,123096.000000,85100.000000,5.822105)}
{pt3dadd(197628.000000,122892.000000,84975.000000,5.822105)}
{pt3dadd(197496.000000,122688.000000,84775.000000,9.959327)}
{pt3dadd(197364.000000,122388.000000,84675.000000,9.188976)}
{pt3dadd(197292.000000,122196.000000,84650.000000,12.740730)}
{pt3dadd(197184.000000,121992.000000,84650.000000,20.234551)}
{pt3dadd(196956.000000,121812.000000,84575.000000,19.258772)}

{create adhoc53}
{access adhoc53}
{connect adhoc53(1), adhoc52(0)}
{nseg = 1}
{strdef color color = "White"}
{pt3dclear()}
{pt3dadd(196956.000000,121812.000000,84575.000000,19.258772)}
{pt3dadd(195828.000000,121812.000000,84450.000000,9.499480)}
{pt3dadd(195588.000000,121812.000000,84300.000000,6.299688)}
{pt3dadd(195336.000000,121548.000000,84125.000000,5.529337)}
{pt3dadd(195108.000000,121356.000000,83825.000000,4.281404)}
{pt3dadd(194916.000000,121308.000000,83625.000000,4.281404)}
{pt3dadd(194856.000000,121272.000000,83450.000000,4.281404)}
{pt3dadd(194712.000000,121200.000000,83275.000000,6.210428)}
{pt3dadd(194592.000000,121188.000000,83100.000000,3.429025)}
{pt3dadd(194460.000000,121068.000000,82900.000000,3.429025)}
{pt3dadd(194328.000000,121068.000000,82650.000000,4.986545)}
{pt3dadd(194280.000000,121068.000000,82500.000000,6.234479)}
{pt3dadd(194184.000000,121176.000000,82325.000000,6.175757)}
{pt3dadd(194160.000000,121320.000000,82100.000000,7.739669)}

{create adhoc54}
{access adhoc54}
{connect adhoc54(1), adhoc52(0)}
{nseg = 1}
{strdef color color = "White"}
{pt3dclear()}
{pt3dadd(196956.000000,121812.000000,84575.000000,19.258772)}
{pt3dadd(196944.000000,121620.000000,84450.000000,19.258772)}

{create adhoc55}
{access adhoc55}
{connect adhoc55(1), adhoc54(0)}
{nseg = 1}
{strdef color color = "White"}
{pt3dclear()}
{pt3dadd(196944.000000,121620.000000,84450.000000,19.258772)}
{pt3dadd(196308.000000,121620.000000,84925.000000,3.732480)}

{create adhoc56}
{access adhoc56}
{connect adhoc56(1), adhoc54(0)}
{nseg = 1}
{strdef color color = "White"}
{pt3dclear()}
{pt3dadd(196944.000000,121620.000000,84450.000000,19.258772)}
{pt3dadd(196932.000000,121428.000000,84350.000000,13.339181)}
{pt3dadd(196920.000000,121224.000000,84250.000000,8.603509)}
{pt3dadd(196908.000000,121044.000000,84150.000000,8.603509)}
{pt3dadd(196896.000000,120888.000000,84050.000000,5.051754)}
{pt3dadd(196824.000000,120660.000000,83975.000000,5.051754)}
{pt3dadd(196848.000000,120408.000000,83850.000000,5.051754)}
{pt3dadd(196812.000000,120192.000000,83800.000000,8.603509)}
{pt3dadd(196692.000000,119940.000000,83700.000000,5.051754)}
{pt3dadd(196596.000000,119700.000000,83600.000000,5.051754)}
{pt3dadd(196476.000000,119496.000000,83525.000000,5.051754)}
{pt3dadd(196512.000000,119304.000000,83450.000000,8.603509)}
{pt3dadd(196404.000000,119124.000000,83425.000000,5.051754)}
{pt3dadd(196212.000000,118908.000000,83275.000000,5.051754)}
{pt3dadd(196128.000000,118668.000000,83275.000000,5.051754)}
{pt3dadd(196020.000000,118464.000000,83175.000000,8.603509)}
{pt3dadd(195900.000000,118272.000000,83125.000000,5.051754)}
{pt3dadd(195792.000000,118068.000000,83100.000000,5.051754)}
{pt3dadd(195744.000000,117876.000000,83125.000000,5.051754)}
{pt3dadd(195612.000000,117672.000000,83100.000000,8.603509)}
{pt3dadd(195516.000000,117480.000000,83100.000000,5.051754)}
{pt3dadd(195396.000000,117276.000000,83125.000000,5.051754)}
{pt3dadd(195312.000000,117084.000000,83100.000000,5.051754)}
{pt3dadd(195192.000000,116916.000000,83050.000000,7.961550)}
{pt3dadd(195048.000000,116700.000000,82975.000000,4.409795)}
{pt3dadd(195000.000000,116496.000000,82975.000000,4.409795)}
{pt3dadd(194832.000000,116280.000000,82825.000000,4.409795)}
{pt3dadd(194784.000000,116040.000000,82800.000000,8.731901)}
{pt3dadd(194748.000000,115824.000000,82725.000000,5.822105)}
{pt3dadd(194664.000000,115596.000000,82625.000000,5.822105)}
{pt3dadd(194556.000000,115368.000000,82550.000000,5.822105)}
{pt3dadd(194496.000000,115176.000000,82425.000000,9.959327)}
{pt3dadd(194388.000000,114960.000000,82275.000000,5.637221)}
{pt3dadd(194232.000000,114744.000000,81900.000000,5.637221)}
{pt3dadd(194184.000000,114516.000000,81750.000000,5.637221)}
{pt3dadd(194040.000000,114312.000000,81450.000000,10.883748)}
{pt3dadd(194016.000000,114120.000000,81250.000000,6.746526)}
{pt3dadd(193896.000000,113940.000000,81075.000000,6.746526)}
{pt3dadd(193836.000000,113760.000000,80950.000000,6.746526)}
{pt3dadd(193704.000000,113580.000000,80775.000000,11.068632)}
{pt3dadd(193656.000000,113364.000000,80675.000000,5.822105)}
{pt3dadd(193476.000000,113124.000000,80400.000000,5.822105)}
{pt3dadd(193356.000000,112920.000000,80250.000000,5.822105)}
{pt3dadd(193224.000000,112752.000000,80050.000000,8.731901)}
{pt3dadd(193116.000000,112572.000000,79950.000000,7.319591)}
{pt3dadd(192864.000000,112404.000000,79675.000000,10.871345)}
{pt3dadd(192672.000000,112284.000000,79550.000000,17.118909)}
{pt3dadd(192468.000000,112080.000000,79425.000000,19.258772)}

{create adhoc57}
{access adhoc57}
{connect adhoc57(1), adhoc56(0)}
{nseg = 1}
{strdef color color = "White"}
{pt3dclear()}
{pt3dadd(192468.000000,112080.000000,79425.000000,19.258772)}
{pt3dadd(191676.000000,112080.000000,79750.000000,9.069499)}
{pt3dadd(191664.000000,112380.000000,79650.000000,6.041699)}
{pt3dadd(191580.000000,112512.000000,79675.000000,3.085740)}
{pt3dadd(191556.000000,112620.000000,79650.000000,2.095795)}
{pt3dadd(191532.000000,112740.000000,79600.000000,2.095795)}
{pt3dadd(191520.000000,112860.000000,79525.000000,2.095795)}
{pt3dadd(191508.000000,112980.000000,79475.000000,4.363631)}
{pt3dadd(191532.000000,113124.000000,79400.000000,3.767836)}
{pt3dadd(191568.000000,113256.000000,79275.000000,3.767836)}
{pt3dadd(191556.000000,113376.000000,79225.000000,3.767836)}
{pt3dadd(191568.000000,113496.000000,79175.000000,5.015770)}
{pt3dadd(191556.000000,113628.000000,79050.000000,3.343729)}
{pt3dadd(191448.000000,113700.000000,78850.000000,4.572881)}
{pt3dadd(191316.000000,113880.000000,78700.000000,4.478975)}

{create adhoc58}
{access adhoc58}
{connect adhoc58(1), adhoc56(0)}
{nseg = 1}
{strdef color color = "White"}
{pt3dclear()}
{pt3dadd(192468.000000,112080.000000,79425.000000,19.258772)}
{pt3dadd(192348.000000,111888.000000,79300.000000,14.314960)}
{pt3dadd(192324.000000,111684.000000,79250.000000,9.188976)}
{pt3dadd(192132.000000,111492.000000,79100.000000,8.547017)}
{pt3dadd(191988.000000,111312.000000,78975.000000,8.731901)}
{pt3dadd(191772.000000,111168.000000,78750.000000,13.553168)}
{pt3dadd(191604.000000,110940.000000,78625.000000,23.110527)}

{create adhoc59}
{access adhoc59}
{connect adhoc59(1), adhoc58(0)}
{nseg = 1}
{strdef color color = "White"}
{pt3dclear()}
{pt3dadd(191604.000000,110940.000000,78625.000000,23.110527)}
{pt3dadd(191604.000000,110892.000000,78125.000000,11.918550)}
{pt3dadd(191472.000000,110808.000000,77850.000000,7.751130)}
{pt3dadd(191388.000000,110820.000000,77425.000000,7.751130)}
{pt3dadd(191196.000000,110748.000000,77075.000000,5.822105)}
{pt3dadd(191016.000000,110700.000000,76775.000000,5.822105)}
{pt3dadd(191148.000000,110592.000000,76475.000000,5.822105)}
{pt3dadd(191100.000000,110508.000000,76225.000000,7.070039)}
{pt3dadd(191088.000000,110460.000000,75925.000000,2.747934)}
{pt3dadd(190980.000000,110412.000000,75850.000000,2.747934)}
{pt3dadd(190848.000000,110364.000000,75650.000000,2.747934)}
{pt3dadd(190644.000000,110268.000000,75475.000000,6.145618)}
{pt3dadd(190404.000000,110028.000000,75325.000000,4.897684)}
{pt3dadd(190080.000000,110064.000000,75000.000000,4.897684)}
{pt3dadd(189720.000000,109860.000000,74775.000000,4.897684)}
{pt3dadd(189288.000000,109728.000000,74600.000000,6.455205)}
{pt3dadd(188928.000000,109584.000000,74475.000000,3.057520)}
{pt3dadd(188784.000000,109608.000000,74500.000000,3.057520)}
{pt3dadd(188628.000000,109488.000000,74475.000000,3.057520)}
{pt3dadd(188496.000000,109356.000000,74400.000000,4.047465)}
{pt3dadd(188352.000000,109404.000000,74400.000000,2.489945)}
{pt3dadd(188208.000000,109164.000000,74400.000000,3.479890)}
{pt3dadd(188076.000000,108948.000000,74375.000000,4.469834)}
{pt3dadd(187944.000000,108888.000000,74225.000000,4.799816)}
{pt3dadd(187824.000000,108708.000000,74250.000000,6.449724)}

{create adhoc60}
{access adhoc60}
{connect adhoc60(1), adhoc58(0)}
{nseg = 1}
{strdef color color = "White"}
{pt3dclear()}
{pt3dadd(191604.000000,110940.000000,78625.000000,23.110527)}
{pt3dadd(191316.000000,110892.000000,78775.000000,13.553168)}
{pt3dadd(191016.000000,110652.000000,78750.000000,8.731901)}
{pt3dadd(191028.000000,110448.000000,78725.000000,6.338820)}
{pt3dadd(190860.000000,110292.000000,78850.000000,3.429025)}
{pt3dadd(190644.000000,110148.000000,79125.000000,3.429025)}
{pt3dadd(190512.000000,110052.000000,79300.000000,3.429025)}
{pt3dadd(190392.000000,109932.000000,79400.000000,5.803854)}
{pt3dadd(190188.000000,109776.000000,79550.000000,3.874829)}
{pt3dadd(190068.000000,109728.000000,79675.000000,5.803854)}
{pt3dadd(189972.000000,109584.000000,79775.000000,7.051788)}
{pt3dadd(189768.000000,109452.000000,79925.000000,6.794931)}
{pt3dadd(189648.000000,109320.000000,79975.000000,7.739669)}

{create adhoc61}
{access adhoc61}
{connect adhoc61(1), adhoc60(0)}
{nseg = 1}
{strdef color color = "White"}
{pt3dclear()}
{pt3dadd(189648.000000,109320.000000,79975.000000,7.739669)}
{pt3dadd(189180.000000,109368.000000,79925.000000,7.739669)}

{create adhoc62}
{access adhoc62}
{connect adhoc62(1), adhoc60(0)}
{nseg = 1}
{strdef color color = "White"}
{pt3dclear()}
{pt3dadd(189648.000000,109320.000000,79975.000000,7.739669)}
{pt3dadd(189888.000000,109572.000000,80350.000000,6.794931)}
{pt3dadd(189948.000000,109716.000000,80600.000000,8.299722)}
{pt3dadd(190068.000000,109692.000000,80850.000000,7.537939)}
{pt3dadd(190164.000000,109716.000000,81075.000000,7.739669)}

{create adhoc63}
{access adhoc63}
{connect adhoc63(1), adhoc5(0)}
{nseg = 1}
{strdef color color = "White"}
{pt3dclear()}
{pt3dadd(196464.000000,183180.000000,85025.000000,57.506386)}
{pt3dadd(195492.000000,183180.000000,83600.000000,23.383836)}
{pt3dadd(195072.000000,183180.000000,83250.000000,14.630302)}
{pt3dadd(194928.000000,182928.000000,83000.000000,4.418969)}
{pt3dadd(194784.000000,182724.000000,82800.000000,4.047465)}
{pt3dadd(194472.000000,182460.000000,82600.000000,5.887329)}
{pt3dadd(194244.000000,182160.000000,82400.000000,8.812214)}
{pt3dadd(193932.000000,181980.000000,82150.000000,10.699317)}

{create adhoc64}
{access adhoc64}
{connect adhoc64(1), adhoc63(0)}
{nseg = 1}
{strdef color color = "White"}
{pt3dclear()}
{pt3dadd(193932.000000,181980.000000,82150.000000,10.699317)}
{pt3dadd(193692.000000,182004.000000,81850.000000,5.858029)}
{pt3dadd(193524.000000,182028.000000,81625.000000,4.114817)}
{pt3dadd(193164.000000,182004.000000,81450.000000,3.832474)}
{pt3dadd(192792.000000,181992.000000,81275.000000,3.057520)}
{pt3dadd(192600.000000,181884.000000,80975.000000,3.057520)}
{pt3dadd(192648.000000,181620.000000,80675.000000,3.057520)}
{pt3dadd(192672.000000,181332.000000,80425.000000,4.047465)}
{pt3dadd(192756.000000,181128.000000,80150.000000,3.085740)}
{pt3dadd(192768.000000,180864.000000,79875.000000,4.142900)}
{pt3dadd(192732.000000,180816.000000,79725.000000,4.478975)}

{create adhoc65}
{access adhoc65}
{connect adhoc65(1), adhoc63(0)}
{nseg = 1}
{strdef color color = "White"}
{pt3dclear()}
{pt3dadd(193932.000000,181980.000000,82150.000000,10.699317)}
{pt3dadd(193500.000000,181308.000000,82100.000000,5.858029)}
{pt3dadd(193692.000000,180996.000000,82100.000000,5.306407)}
{pt3dadd(193824.000000,180876.000000,82125.000000,3.485983)}
{pt3dadd(193824.000000,180744.000000,82100.000000,4.478975)}

{create adhoc66}
{access adhoc66}
{connect adhoc66(1), adhoc4(0)}
{nseg = 1}
{strdef color color = "White"}
{pt3dclear()}
{pt3dadd(196632.000000,186840.000000,86500.000000,61.053562)}
{pt3dadd(194868.000000,186840.000000,87600.000000,26.200846)}
{pt3dadd(194364.000000,186840.000000,88025.000000,16.320508)}
{pt3dadd(194016.000000,187260.000000,88225.000000,6.338820)}
{pt3dadd(193860.000000,187368.000000,88200.000000,3.429025)}
{pt3dadd(193704.000000,187476.000000,88200.000000,3.429025)}
{pt3dadd(193584.000000,187620.000000,88350.000000,3.429025)}
{pt3dadd(193464.000000,187776.000000,88425.000000,5.803854)}
{pt3dadd(193308.000000,187860.000000,88450.000000,5.714693)}
{pt3dadd(193188.000000,187872.000000,88425.000000,8.524488)}
{pt3dadd(193032.000000,187956.000000,88300.000000,10.699317)}

{create adhoc67}
{access adhoc67}
{connect adhoc67(1), adhoc66(0)}
{nseg = 1}
{strdef color color = "White"}
{pt3dclear()}
{pt3dadd(193032.000000,187956.000000,88300.000000,10.699317)}
{pt3dadd(192864.000000,188100.000000,88200.000000,7.162306)}
{pt3dadd(192696.000000,188172.000000,88175.000000,4.897384)}
{pt3dadd(192552.000000,188292.000000,88225.000000,3.832474)}
{pt3dadd(192420.000000,188424.000000,88150.000000,2.274954)}
{pt3dadd(192312.000000,188508.000000,88050.000000,2.274954)}
{pt3dadd(192372.000000,188724.000000,88200.000000,2.721450)}
{pt3dadd(192336.000000,188832.000000,88200.000000,3.317245)}
{pt3dadd(192228.000000,189048.000000,88125.000000,3.237152)}
{pt3dadd(192120.000000,189036.000000,88125.000000,4.478975)}

{create adhoc68}
{access adhoc68}
{connect adhoc68(1), adhoc66(0)}
{nseg = 1}
{strdef color color = "White"}
{pt3dclear()}
{pt3dadd(193032.000000,187956.000000,88300.000000,10.699317)}
{pt3dadd(193584.000000,188148.000000,88300.000000,7.780259)}
{pt3dadd(193680.000000,188160.000000,88200.000000,5.706811)}
{pt3dadd(193764.000000,188196.000000,88175.000000,4.478975)}

{create adhoc69}
{access adhoc69}
{connect adhoc69(1), adhoc3(0)}
{nseg = 1}
{strdef color color = "White"}
{pt3dclear()}
{pt3dadd(192120.000000,198684.000000,95325.000000,99.371025)}
{pt3dadd(190764.000000,200520.000000,95325.000000,49.597672)}
{pt3dadd(190488.000000,200844.000000,95325.000000,30.358603)}
{pt3dadd(190152.000000,201132.000000,95325.000000,14.336152)}
{pt3dadd(189732.000000,201504.000000,94775.000000,6.609275)}
{pt3dadd(189300.000000,202224.000000,94325.000000,8.984104)}
{pt3dadd(189096.000000,203316.000000,94125.000000,13.973507)}
{pt3dadd(188652.000000,203796.000000,93800.000000,13.374147)}

{create adhoc70}
{access adhoc70}
{connect adhoc70(1), adhoc2(0)}
{nseg = 1}
{strdef color color = "White"}
{pt3dclear()}
{pt3dadd(184284.000000,185784.000000,120850.000000,47.921990)}
{pt3dadd(184896.000000,184140.000000,120850.000000,29.785660)}
{pt3dadd(184512.000000,183552.000000,120850.000000,19.842145)}
{pt3dadd(183816.000000,182796.000000,121350.000000,3.784582)}
{pt3dadd(183276.000000,182316.000000,121925.000000,4.478975)}

{create adhoc71}
{access adhoc71}
{connect adhoc71(1), adhoc1(0)}
{nseg = 1}
{strdef color color = "White"}
{pt3dclear()}
{pt3dadd(151164.000000,153612.000000,153775.000000,119.245230)}
{pt3dadd(152664.000000,156756.000000,153775.000000,42.828300)}
{pt3dadd(152784.000000,157140.000000,153400.000000,26.296980)}
{pt3dadd(152916.000000,157608.000000,153200.000000,3.995868)}
{pt3dadd(152688.000000,157560.000000,153000.000000,2.747934)}
{pt3dadd(152952.000000,157836.000000,152750.000000,2.747934)}
{pt3dadd(153072.000000,158112.000000,152425.000000,2.747934)}
{pt3dadd(153000.000000,158616.000000,152175.000000,4.305454)}
{pt3dadd(153180.000000,159000.000000,151950.000000,3.057520)}
{pt3dadd(153408.000000,159360.000000,151725.000000,3.057520)}
{pt3dadd(153720.000000,159768.000000,151475.000000,3.057520)}
{pt3dadd(153900.000000,160104.000000,151225.000000,3.617484)}
{pt3dadd(154068.000000,160668.000000,150725.000000,2.834917)}
{pt3dadd(153972.000000,161100.000000,150350.000000,3.724862)}
{pt3dadd(154296.000000,161796.000000,149700.000000,5.374770)}
