# Supplementary material for: Full reconstruction of large lobula plate tangential cells in Drosophila from a 3D EM dataset
Source: PLoS One. 2018 Nov 28;13(11):e0207828. doi: 10.1371/journal.pone.0207828 (PMC6261601; doi:10.1371/journal.pone.0207828)
Supplement: S1 Dataset — (ZIP) [file pone.0207828.s001.zip › Diameter hoc/VS_VSL_preliminary/VS6_4skels_ck.001_completed.hoc0003.hoc]

/* created with convertKnossosNmlToHoc.m */

{create adhoc1}
{access adhoc1}
{nseg = 1}
{strdef color color = "White"}
{pt3dclear()}
{pt3dadd(192372.000000,188808.000000,88175.000000,7.739669)}
{pt3dadd(192468.000000,188616.000000,88175.000000,6.794931)}
{pt3dadd(192612.000000,188412.000000,88250.000000,4.676958)}
{pt3dadd(192864.000000,188184.000000,88275.000000,4.676958)}
{pt3dadd(193332.000000,187908.000000,88575.000000,2.747934)}
{pt3dadd(193620.000000,187608.000000,88300.000000,2.747934)}
{pt3dadd(193944.000000,187368.000000,88225.000000,5.657729)}
{pt3dadd(194256.000000,187164.000000,88150.000000,16.398955)}
{pt3dadd(194568.000000,186972.000000,87875.000000,24.251702)}
{pt3dadd(196608.000000,186624.000000,86425.000000,55.206130)}

{create adhoc2}
{access adhoc2}
{connect adhoc2(1), adhoc1(0)}
{nseg = 1}
{strdef color color = "White"}
{pt3dclear()}
{pt3dadd(196608.000000,186624.000000,86425.000000,55.206130)}
{pt3dadd(196536.000000,186156.000000,86300.000000,37.304087)}
{pt3dadd(196596.000000,185772.000000,86025.000000,22.982452)}
{pt3dadd(196680.000000,185364.000000,85975.000000,21.142248)}
{pt3dadd(196584.000000,185076.000000,85700.000000,10.401022)}
{pt3dadd(196512.000000,184764.000000,85625.000000,10.401022)}
{pt3dadd(196488.000000,184488.000000,85625.000000,10.401022)}
{pt3dadd(196584.000000,184116.000000,85475.000000,21.142250)}
{pt3dadd(196632.000000,183756.000000,85250.000000,12.241228)}
{pt3dadd(196596.000000,183468.000000,85100.000000,12.241228)}
{pt3dadd(196596.000000,183108.000000,85275.000000,12.241228)}
{pt3dadd(196716.000000,182712.000000,85225.000000,19.928226)}
{pt3dadd(196800.000000,182436.000000,85275.000000,9.186998)}
{pt3dadd(196860.000000,182004.000000,85200.000000,9.186998)}
{pt3dadd(196908.000000,181608.000000,85125.000000,9.186998)}
{pt3dadd(196992.000000,181008.000000,85150.000000,18.471396)}
{pt3dadd(197052.000000,180540.000000,85025.000000,20.068796)}
{pt3dadd(197016.000000,180108.000000,84975.000000,29.353194)}
{pt3dadd(196944.000000,179772.000000,84900.000000,47.921990)}
{pt3dadd(196956.000000,179640.000000,84900.000000,47.921990)}

{create adhoc3}
{access adhoc3}
{connect adhoc3(1), adhoc2(0)}
{nseg = 1}
{strdef color color = "White"}
{pt3dclear()}
{pt3dadd(196956.000000,179640.000000,84900.000000,47.921990)}
{pt3dadd(195888.000000,179496.000000,86100.000000,19.569864)}
{pt3dadd(195648.000000,179196.000000,86125.000000,12.341918)}
{pt3dadd(195552.000000,179004.000000,86250.000000,4.986545)}
{pt3dadd(195444.000000,178776.000000,86450.000000,3.429025)}
{pt3dadd(195408.000000,178476.000000,86850.000000,3.429025)}
{pt3dadd(195576.000000,178224.000000,87425.000000,3.429025)}
{pt3dadd(195624.000000,177984.000000,87550.000000,5.803854)}
{pt3dadd(195600.000000,177756.000000,87775.000000,3.874829)}
{pt3dadd(195564.000000,177552.000000,87925.000000,3.874829)}
{pt3dadd(195528.000000,177348.000000,88150.000000,3.874829)}
{pt3dadd(195312.000000,177264.000000,89125.000000,8.196935)}
{pt3dadd(195432.000000,177504.000000,89550.000000,5.822105)}
{pt3dadd(195444.000000,177432.000000,89950.000000,5.822105)}
{pt3dadd(195420.000000,177228.000000,90350.000000,5.822105)}
{pt3dadd(195444.000000,176880.000000,90750.000000,7.008122)}
{pt3dadd(195516.000000,176808.000000,91200.000000,3.460970)}
{pt3dadd(195852.000000,176736.000000,91550.000000,4.768284)}
{pt3dadd(196152.000000,176004.000000,91925.000000,5.374770)}

{create adhoc4}
{access adhoc4}
{connect adhoc4(1), adhoc2(0)}
{nseg = 1}
{strdef color color = "White"}
{pt3dclear()}
{pt3dadd(196956.000000,179640.000000,84900.000000,47.921990)}
{pt3dadd(197076.000000,179304.000000,84700.000000,32.447993)}
{pt3dadd(197100.000000,178956.000000,84600.000000,20.068796)}
{pt3dadd(197184.000000,178440.000000,84425.000000,20.068796)}
{pt3dadd(197184.000000,177888.000000,84225.000000,10.784398)}
{pt3dadd(197184.000000,177480.000000,84075.000000,10.784398)}
{pt3dadd(197196.000000,177060.000000,83875.000000,10.784398)}
{pt3dadd(197220.000000,176172.000000,83625.000000,21.525624)}
{pt3dadd(197484.000000,175644.000000,83200.000000,12.241226)}
{pt3dadd(197544.000000,174948.000000,83275.000000,12.241226)}
{pt3dadd(197844.000000,174612.000000,83550.000000,12.241226)}
{pt3dadd(197904.000000,174348.000000,83400.000000,19.928224)}
{pt3dadd(197940.000000,174072.000000,83475.000000,9.186998)}
{pt3dadd(197940.000000,173868.000000,83525.000000,9.186998)}
{pt3dadd(198036.000000,173496.000000,83450.000000,9.186998)}
{pt3dadd(198204.000000,173196.000000,83500.000000,15.542830)}
{pt3dadd(198288.000000,172896.000000,83550.000000,14.211664)}
{pt3dadd(198252.000000,172632.000000,83400.000000,21.898662)}
{pt3dadd(198468.000000,171216.000000,83400.000000,35.497770)}
{pt3dadd(198960.000000,168516.000000,83400.000000,39.934990)}

{create adhoc5}
{access adhoc5}
{connect adhoc5(1), adhoc4(0)}
{nseg = 1}
{strdef color color = "White"}
{pt3dclear()}
{pt3dadd(198960.000000,168516.000000,83400.000000,39.934990)}
{pt3dadd(198384.000000,168276.000000,82150.000000,16.907531)}
{pt3dadd(198252.000000,168048.000000,81875.000000,10.744518)}
{pt3dadd(197880.000000,167904.000000,81150.000000,6.846863)}
{pt3dadd(197184.000000,167748.000000,79975.000000,5.289343)}
{pt3dadd(196908.000000,167760.000000,79625.000000,5.289343)}
{pt3dadd(197040.000000,167868.000000,79250.000000,5.289343)}
{pt3dadd(196608.000000,167928.000000,78900.000000,9.426564)}
{pt3dadd(196332.000000,168132.000000,78500.000000,7.194742)}
{pt3dadd(195864.000000,168156.000000,78175.000000,10.991237)}
{pt3dadd(195768.000000,168084.000000,77725.000000,9.287602)}

{create adhoc6}
{access adhoc6}
{connect adhoc6(1), adhoc4(0)}
{nseg = 1}
{strdef color color = "White"}
{pt3dclear()}
{pt3dadd(198960.000000,168516.000000,83400.000000,39.934990)}
{pt3dadd(198996.000000,166224.000000,83400.000000,26.590860)}
{pt3dadd(199044.000000,165768.000000,83400.000000,31.085440)}
{pt3dadd(199356.000000,165564.000000,84225.000000,25.718207)}
{pt3dadd(200028.000000,162000.000000,84225.000000,47.921990)}

{create adhoc7}
{access adhoc7}
{connect adhoc7(1), adhoc6(0)}
{nseg = 1}
{strdef color color = "White"}
{pt3dclear()}
{pt3dadd(200028.000000,162000.000000,84225.000000,47.921990)}
{pt3dadd(198504.000000,161760.000000,84350.000000,22.153640)}
{pt3dadd(197988.000000,161448.000000,83725.000000,13.892184)}
{pt3dadd(197556.000000,161256.000000,83425.000000,5.855720)}
{pt3dadd(197340.000000,161148.000000,82825.000000,3.522888)}
{pt3dadd(197352.000000,160980.000000,82250.000000,4.871480)}
{pt3dadd(197544.000000,160716.000000,82125.000000,5.374770)}

{create adhoc8}
{access adhoc8}
{connect adhoc8(1), adhoc6(0)}
{nseg = 1}
{strdef color color = "White"}
{pt3dclear()}
{pt3dadd(200028.000000,162000.000000,84225.000000,47.921990)}
{pt3dadd(200340.000000,160356.000000,84225.000000,32.447993)}
{pt3dadd(200412.000000,159960.000000,85275.000000,37.040192)}
{pt3dadd(200496.000000,159600.000000,85325.000000,29.785660)}
{pt3dadd(200520.000000,157980.000000,85325.000000,39.934990)}

{create adhoc9}
{access adhoc9}
{connect adhoc9(1), adhoc8(0)}
{nseg = 1}
{strdef color color = "White"}
{pt3dclear()}
{pt3dadd(200520.000000,157980.000000,85325.000000,39.934990)}
{pt3dadd(201084.000000,157596.000000,85975.000000,23.055874)}
{pt3dadd(201132.000000,157344.000000,86300.000000,14.433524)}
{pt3dadd(201264.000000,157020.000000,86550.000000,13.102358)}
{pt3dadd(201360.000000,156708.000000,86650.000000,7.855832)}
{pt3dadd(201456.000000,156444.000000,86925.000000,7.855832)}
{pt3dadd(201540.000000,156180.000000,87200.000000,7.855832)}
{pt3dadd(201504.000000,155928.000000,87325.000000,17.140230)}
{pt3dadd(201528.000000,155700.000000,87325.000000,10.784398)}
{pt3dadd(201540.000000,155448.000000,87325.000000,10.784398)}
{pt3dadd(201540.000000,155160.000000,87550.000000,10.784398)}
{pt3dadd(201480.000000,154812.000000,87825.000000,18.471396)}
{pt3dadd(201792.000000,154500.000000,87950.000000,9.186998)}
{pt3dadd(201660.000000,154200.000000,88050.000000,9.186998)}
{pt3dadd(201756.000000,153936.000000,88250.000000,9.186998)}
{pt3dadd(201924.000000,153636.000000,88375.000000,16.873996)}
{pt3dadd(202008.000000,153408.000000,88450.000000,9.186998)}
{pt3dadd(201972.000000,153228.000000,88525.000000,9.186998)}
{pt3dadd(201972.000000,153000.000000,88575.000000,9.186998)}
{pt3dadd(202020.000000,152808.000000,88575.000000,16.554516)}
{pt3dadd(202068.000000,152604.000000,88575.000000,8.867518)}
{pt3dadd(202116.000000,152388.000000,88625.000000,8.867518)}
{pt3dadd(202164.000000,152172.000000,88625.000000,8.867518)}
{pt3dadd(202188.000000,152016.000000,88625.000000,15.223350)}
{pt3dadd(202212.000000,151812.000000,88550.000000,7.855832)}
{pt3dadd(202236.000000,151680.000000,88650.000000,7.855832)}
{pt3dadd(202236.000000,151500.000000,88700.000000,7.855832)}
{pt3dadd(202200.000000,151284.000000,88675.000000,12.177937)}
{pt3dadd(202128.000000,149928.000000,88675.000000,5.822105)}
{pt3dadd(201756.000000,148128.000000,88675.000000,13.509103)}
{pt3dadd(202116.000000,147900.000000,89250.000000,21.196101)}
{pt3dadd(202200.000000,147684.000000,89375.000000,27.123327)}
{pt3dadd(202272.000000,147204.000000,89375.000000,39.934990)}

{create adhoc10}
{access adhoc10}
{connect adhoc10(1), adhoc9(0)}
{nseg = 1}
{strdef color color = "White"}
{pt3dclear()}
{pt3dadd(202272.000000,147204.000000,89375.000000,39.934990)}
{pt3dadd(201720.000000,147204.000000,88000.000000,15.961571)}
{pt3dadd(201588.000000,146940.000000,87650.000000,10.176943)}
{pt3dadd(201564.000000,146688.000000,87425.000000,4.655068)}
{pt3dadd(201336.000000,146580.000000,87325.000000,3.665123)}
{pt3dadd(201120.000000,146292.000000,87175.000000,3.665123)}
{pt3dadd(200940.000000,146124.000000,87350.000000,3.665123)}
{pt3dadd(200724.000000,145872.000000,87400.000000,6.039953)}
{pt3dadd(200532.000000,145428.000000,87350.000000,5.122763)}
{pt3dadd(200244.000000,145152.000000,87325.000000,6.680284)}
{pt3dadd(200004.000000,145080.000000,87275.000000,10.133806)}
{pt3dadd(199764.000000,144720.000000,87050.000000,9.287602)}

{create adhoc11}
{access adhoc11}
{connect adhoc11(1), adhoc9(0)}
{nseg = 1}
{strdef color color = "White"}
{pt3dclear()}
{pt3dadd(202272.000000,147204.000000,89375.000000,39.934990)}
{pt3dadd(202236.000000,146148.000000,89375.000000,27.123327)}
{pt3dadd(202008.000000,145620.000000,90200.000000,16.873996)}
{pt3dadd(201372.000000,143100.000000,90200.000000,15.542830)}
{pt3dadd(201096.000000,140040.000000,90200.000000,13.102358)}
{pt3dadd(200880.000000,137724.000000,90200.000000,20.837264)}
{pt3dadd(201012.000000,137496.000000,90200.000000,27.732632)}

{create adhoc12}
{access adhoc12}
{connect adhoc12(1), adhoc11(0)}
{nseg = 1}
{strdef color color = "White"}
{pt3dclear()}
{pt3dadd(201012.000000,137496.000000,90200.000000,27.732632)}
{pt3dadd(200616.000000,137184.000000,91325.000000,14.202260)}
{pt3dadd(200448.000000,136860.000000,91550.000000,9.121356)}
{pt3dadd(200340.000000,136644.000000,91675.000000,6.249659)}
{pt3dadd(200280.000000,136356.000000,91675.000000,3.874829)}
{pt3dadd(200244.000000,136104.000000,91800.000000,3.874829)}
{pt3dadd(200148.000000,135912.000000,92075.000000,3.874829)}
{pt3dadd(200016.000000,135588.000000,92150.000000,7.426584)}
{pt3dadd(199872.000000,135360.000000,92350.000000,5.051754)}
{pt3dadd(199764.000000,135144.000000,92350.000000,5.051754)}
{pt3dadd(199692.000000,134856.000000,92500.000000,5.051754)}
{pt3dadd(199560.000000,134544.000000,92450.000000,8.603509)}
{pt3dadd(199416.000000,134268.000000,92475.000000,5.051754)}
{pt3dadd(199272.000000,134004.000000,92525.000000,5.051754)}
{pt3dadd(199164.000000,133668.000000,92550.000000,5.051754)}
{pt3dadd(199092.000000,133404.000000,92600.000000,7.961550)}
{pt3dadd(198996.000000,133176.000000,92650.000000,4.409795)}
{pt3dadd(198900.000000,132960.000000,92650.000000,4.409795)}
{pt3dadd(198828.000000,132732.000000,92600.000000,4.409795)}
{pt3dadd(198768.000000,132504.000000,92600.000000,7.319591)}
{pt3dadd(198696.000000,132288.000000,92650.000000,4.409795)}
{pt3dadd(198528.000000,132048.000000,92700.000000,4.409795)}
{pt3dadd(198492.000000,131844.000000,92725.000000,4.409795)}
{pt3dadd(198468.000000,131592.000000,92800.000000,7.319591)}
{pt3dadd(198480.000000,131364.000000,92950.000000,4.409795)}
{pt3dadd(198492.000000,131124.000000,93000.000000,4.409795)}
{pt3dadd(198504.000000,130872.000000,93050.000000,4.409795)}
{pt3dadd(198528.000000,130668.000000,93250.000000,7.319591)}
{pt3dadd(198504.000000,130476.000000,93375.000000,4.409795)}
{pt3dadd(198444.000000,130260.000000,93375.000000,4.409795)}
{pt3dadd(198336.000000,130056.000000,93425.000000,4.409795)}
{pt3dadd(198348.000000,129840.000000,93575.000000,7.319591)}
{pt3dadd(198288.000000,129576.000000,93700.000000,4.409795)}
{pt3dadd(198300.000000,129360.000000,93725.000000,4.409795)}
{pt3dadd(198324.000000,129120.000000,93775.000000,4.409795)}
{pt3dadd(198288.000000,128868.000000,93775.000000,7.319591)}
{pt3dadd(198120.000000,128700.000000,93800.000000,4.409795)}
{pt3dadd(197940.000000,128664.000000,93800.000000,4.409795)}
{pt3dadd(197844.000000,128412.000000,93925.000000,4.409795)}
{pt3dadd(197736.000000,127272.000000,93925.000000,7.319591)}
{pt3dadd(197712.000000,127128.000000,94100.000000,4.409795)}
{pt3dadd(197544.000000,125832.000000,94100.000000,4.409795)}
{pt3dadd(197460.000000,125640.000000,94250.000000,4.409795)}
{pt3dadd(197280.000000,125424.000000,94225.000000,12.096793)}
{pt3dadd(197208.000000,125196.000000,94125.000000,13.324219)}
{pt3dadd(197100.000000,124932.000000,94400.000000,21.207032)}
{pt3dadd(197124.000000,124692.000000,94375.000000,22.186106)}

{create adhoc13}
{access adhoc13}
{connect adhoc13(1), adhoc12(0)}
{nseg = 1}
{strdef color color = "White"}
{pt3dclear()}
{pt3dadd(197124.000000,124692.000000,94375.000000,22.186106)}
{pt3dadd(197184.000000,124608.000000,93600.000000,13.031042)}
{pt3dadd(197040.000000,124380.000000,93500.000000,8.418625)}
{pt3dadd(196980.000000,124140.000000,93475.000000,5.271349)}
{pt3dadd(196920.000000,123900.000000,93350.000000,2.489945)}
{pt3dadd(196824.000000,123696.000000,93350.000000,2.489945)}
{pt3dadd(196752.000000,123480.000000,93275.000000,2.489945)}
{pt3dadd(196644.000000,123204.000000,93275.000000,3.479890)}
{pt3dadd(196572.000000,122964.000000,93125.000000,2.489945)}
{pt3dadd(196500.000000,122736.000000,93125.000000,2.489945)}
{pt3dadd(196356.000000,122496.000000,93050.000000,2.489945)}
{pt3dadd(196380.000000,122280.000000,92925.000000,4.864774)}
{pt3dadd(196248.000000,122040.000000,92825.000000,3.874829)}
{pt3dadd(196032.000000,121764.000000,92675.000000,3.874829)}
{pt3dadd(196032.000000,121548.000000,92700.000000,3.874829)}
{pt3dadd(195936.000000,121320.000000,92550.000000,6.784625)}
{pt3dadd(195804.000000,121140.000000,92500.000000,4.409795)}
{pt3dadd(195216.000000,120600.000000,92475.000000,4.409795)}
{pt3dadd(195192.000000,120348.000000,92100.000000,4.409795)}
{pt3dadd(195120.000000,120168.000000,92025.000000,7.319591)}
{pt3dadd(194952.000000,119928.000000,91650.000000,6.338820)}
{pt3dadd(194640.000000,119736.000000,91650.000000,7.113774)}
{pt3dadd(194568.000000,119580.000000,91525.000000,10.856290)}
{pt3dadd(194544.000000,119400.000000,91450.000000,5.374770)}

{create adhoc14}
{access adhoc14}
{connect adhoc14(1), adhoc12(0)}
{nseg = 1}
{strdef color color = "White"}
{pt3dclear()}
{pt3dadd(197124.000000,124692.000000,94375.000000,22.186106)}
{pt3dadd(196776.000000,124548.000000,95125.000000,13.245028)}
{pt3dadd(196512.000000,124272.000000,95300.000000,8.547017)}
{pt3dadd(196416.000000,124044.000000,95275.000000,5.893015)}
{pt3dadd(196236.000000,124560.000000,95600.000000,4.540740)}
{pt3dadd(195936.000000,124428.000000,95875.000000,6.567900)}
{pt3dadd(195912.000000,124476.000000,96025.000000,9.287602)}

{create adhoc15}
{access adhoc15}
{connect adhoc15(1), adhoc11(0)}
{nseg = 1}
{strdef color color = "White"}
{pt3dclear()}
{pt3dadd(201012.000000,137496.000000,90200.000000,27.732632)}
{pt3dadd(200760.000000,137076.000000,90050.000000,17.447720)}
{pt3dadd(200688.000000,136848.000000,90000.000000,11.068632)}
{pt3dadd(200604.000000,135432.000000,90000.000000,11.068632)}
{pt3dadd(200472.000000,135024.000000,89700.000000,6.746526)}
{pt3dadd(200472.000000,134688.000000,89550.000000,6.746526)}
{pt3dadd(200472.000000,134388.000000,89400.000000,6.746526)}
{pt3dadd(200400.000000,134112.000000,89250.000000,13.102358)}
{pt3dadd(200268.000000,133788.000000,89025.000000,7.855832)}
{pt3dadd(199800.000000,132996.000000,89050.000000,7.855832)}
{pt3dadd(199224.000000,131148.000000,89050.000000,7.855832)}
{pt3dadd(199164.000000,130896.000000,88650.000000,13.102358)}
{pt3dadd(199128.000000,130716.000000,88625.000000,6.746526)}
{pt3dadd(198768.000000,129384.000000,88625.000000,6.746526)}
{pt3dadd(198672.000000,129024.000000,88000.000000,6.746526)}
{pt3dadd(198648.000000,128664.000000,87800.000000,10.298281)}
{pt3dadd(198624.000000,128340.000000,87825.000000,5.051754)}
{pt3dadd(198624.000000,128064.000000,87800.000000,5.051754)}
{pt3dadd(198672.000000,127824.000000,87725.000000,5.051754)}
{pt3dadd(198732.000000,127524.000000,87850.000000,10.298281)}
{pt3dadd(198672.000000,127188.000000,87900.000000,6.746526)}
{pt3dadd(198420.000000,125340.000000,87900.000000,6.746526)}
{pt3dadd(198312.000000,124992.000000,87400.000000,6.746526)}
{pt3dadd(198072.000000,124656.000000,87250.000000,11.068632)}
{pt3dadd(197100.000000,122676.000000,87250.000000,5.822105)}
{pt3dadd(196800.000000,122376.000000,86825.000000,5.822105)}
{pt3dadd(196668.000000,122004.000000,86725.000000,5.822105)}
{pt3dadd(196524.000000,121764.000000,86625.000000,11.068632)}
{pt3dadd(196308.000000,121500.000000,86400.000000,6.746526)}
{pt3dadd(195780.000000,120012.000000,86400.000000,6.746526)}
{pt3dadd(195504.000000,119724.000000,85925.000000,6.746526)}
{pt3dadd(195504.000000,119424.000000,85975.000000,9.014363)}
{pt3dadd(195444.000000,119100.000000,85950.000000,3.767836)}
{pt3dadd(195336.000000,118776.000000,85800.000000,3.767836)}
{pt3dadd(195276.000000,118464.000000,85675.000000,3.767836)}
{pt3dadd(195108.000000,118104.000000,85625.000000,6.142666)}
{pt3dadd(194940.000000,117804.000000,85575.000000,3.874829)}
{pt3dadd(194796.000000,117468.000000,85425.000000,3.874829)}
{pt3dadd(194580.000000,117072.000000,85275.000000,3.874829)}
{pt3dadd(194400.000000,116772.000000,85100.000000,6.784625)}
{pt3dadd(194328.000000,116460.000000,85025.000000,5.967316)}
{pt3dadd(193932.000000,116088.000000,84600.000000,8.945526)}
{pt3dadd(194064.000000,115980.000000,84675.000000,9.287602)}

{create adhoc16}
{access adhoc16}
{connect adhoc16(1), adhoc15(0)}
{nseg = 1}
{strdef color color = "White"}
{pt3dclear()}
{pt3dadd(194064.000000,115980.000000,84675.000000,9.287602)}
{pt3dadd(194604.000000,115896.000000,84875.000000,9.703824)}
{pt3dadd(194700.000000,115680.000000,84975.000000,8.399547)}
{pt3dadd(194628.000000,115428.000000,85025.000000,5.374770)}

{create adhoc17}
{access adhoc17}
{connect adhoc17(1), adhoc15(0)}
{nseg = 1}
{strdef color color = "White"}
{pt3dclear()}
{pt3dadd(194064.000000,115980.000000,84675.000000,9.287602)}
{pt3dadd(193632.000000,115776.000000,84475.000000,8.945526)}
{pt3dadd(192720.000000,115392.000000,84400.000000,5.967316)}
{pt3dadd(192540.000000,114924.000000,84525.000000,5.967316)}
{pt3dadd(192264.000000,114624.000000,84475.000000,3.057520)}
{pt3dadd(192228.000000,114312.000000,84350.000000,3.057520)}
{pt3dadd(192096.000000,114084.000000,84400.000000,3.057520)}
{pt3dadd(191748.000000,113520.000000,84400.000000,3.057520)}
{pt3dadd(191712.000000,113232.000000,84600.000000,2.747934)}
{pt3dadd(191616.000000,113040.000000,85000.000000,3.579890)}
{pt3dadd(191616.000000,112968.000000,85000.000000,7.739669)}

{create adhoc18}
{access adhoc18}
{connect adhoc18(1), adhoc8(0)}
{nseg = 1}
{strdef color color = "White"}
{pt3dclear()}
{pt3dadd(200520.000000,157980.000000,85325.000000,39.934990)}
{pt3dadd(199896.000000,157572.000000,85200.000000,19.161322)}
{pt3dadd(199788.000000,157332.000000,85300.000000,12.096793)}
{pt3dadd(199680.000000,157128.000000,85325.000000,7.319591)}
{pt3dadd(199584.000000,156888.000000,85350.000000,4.409795)}
{pt3dadd(199560.000000,156600.000000,85350.000000,4.409795)}
{pt3dadd(199524.000000,156312.000000,85250.000000,4.409795)}
{pt3dadd(199488.000000,156072.000000,85125.000000,8.731901)}
{pt3dadd(199428.000000,155820.000000,84900.000000,5.822105)}
{pt3dadd(199296.000000,155496.000000,84700.000000,5.822105)}
{pt3dadd(199152.000000,155208.000000,84425.000000,5.822105)}
{pt3dadd(198936.000000,154848.000000,84250.000000,9.373860)}
{pt3dadd(198996.000000,154596.000000,84250.000000,5.051754)}
{pt3dadd(199092.000000,154296.000000,84175.000000,5.051754)}
{pt3dadd(199092.000000,152628.000000,83225.000000,5.051754)}
{pt3dadd(199092.000000,151296.000000,82000.000000,10.298281)}
{pt3dadd(198768.000000,150948.000000,81600.000000,6.746526)}
{pt3dadd(198456.000000,150684.000000,80900.000000,6.746526)}
{pt3dadd(198060.000000,150456.000000,80350.000000,6.746526)}
{pt3dadd(197520.000000,150204.000000,79825.000000,13.102358)}
{pt3dadd(196608.000000,150204.000000,78500.000000,7.855832)}
{pt3dadd(195768.000000,150204.000000,76800.000000,7.855832)}
{pt3dadd(195480.000000,150480.000000,76350.000000,7.855832)}
{pt3dadd(195240.000000,150636.000000,75925.000000,13.102358)}
{pt3dadd(195060.000000,151008.000000,75450.000000,6.746526)}
{pt3dadd(195072.000000,151068.000000,75050.000000,6.746526)}
{pt3dadd(194976.000000,151128.000000,74650.000000,6.746526)}
{pt3dadd(194580.000000,151104.000000,74200.000000,11.353738)}
{pt3dadd(194520.000000,150888.000000,73750.000000,10.429317)}
{pt3dadd(194424.000000,150720.000000,73325.000000,14.751422)}
{pt3dadd(194448.000000,150396.000000,72750.000000,23.585704)}
{pt3dadd(194604.000000,150228.000000,72275.000000,23.110527)}

{create adhoc19}
{access adhoc19}
{connect adhoc19(1), adhoc1(0)}
{nseg = 1}
{strdef color color = "White"}
{pt3dclear()}
{pt3dadd(196608.000000,186624.000000,86425.000000,55.206130)}
{pt3dadd(196788.000000,187128.000000,86525.000000,38.070839)}
{pt3dadd(196788.000000,187524.000000,86750.000000,23.442503)}
{pt3dadd(196860.000000,187896.000000,87950.000000,23.902554)}
{pt3dadd(196200.000000,189564.000000,88250.000000,12.701277)}
{pt3dadd(195372.000000,190740.000000,88250.000000,12.701277)}
{pt3dadd(195348.000000,191064.000000,88500.000000,12.701277)}
{pt3dadd(195072.000000,191328.000000,88825.000000,20.388275)}
{pt3dadd(194988.000000,191592.000000,89200.000000,9.186998)}
{pt3dadd(194940.000000,191856.000000,89600.000000,9.186998)}
{pt3dadd(194784.000000,192120.000000,90125.000000,9.186998)}
{pt3dadd(194688.000000,192396.000000,90475.000000,20.388275)}
{pt3dadd(194712.000000,192684.000000,90800.000000,12.701277)}
{pt3dadd(194520.000000,193032.000000,91225.000000,12.701277)}
{pt3dadd(194436.000000,193380.000000,91650.000000,12.701277)}
{pt3dadd(194232.000000,193620.000000,91800.000000,23.902554)}
{pt3dadd(194088.000000,193848.000000,91875.000000,12.701277)}
{pt3dadd(194004.000000,194088.000000,92175.000000,20.388275)}
{pt3dadd(193632.000000,195600.000000,92375.000000,36.650113)}
{pt3dadd(193212.000000,196716.000000,92925.000000,41.414727)}
{pt3dadd(192312.000000,198792.000000,93500.000000,82.809190)}

{create adhoc20}
{access adhoc20}
{connect adhoc20(1), adhoc19(0)}
{nseg = 1}
{strdef color color = "White"}
{pt3dclear()}
{pt3dadd(192312.000000,198792.000000,93500.000000,82.809190)}
{pt3dadd(190992.000000,199584.000000,93500.000000,51.105617)}
{pt3dadd(189876.000000,201048.000000,93500.000000,31.263370)}
{pt3dadd(189300.000000,202176.000000,93500.000000,31.263370)}
{pt3dadd(188856.000000,202512.000000,91800.000000,17.761838)}
{pt3dadd(188460.000000,202956.000000,91575.000000,17.761838)}
{pt3dadd(187956.000000,203448.000000,91400.000000,17.761838)}
{pt3dadd(187608.000000,203904.000000,91150.000000,28.503064)}
{pt3dadd(187584.000000,204276.000000,91000.000000,12.241226)}
{pt3dadd(187140.000000,204852.000000,90825.000000,12.241226)}
{pt3dadd(186768.000000,205272.000000,90425.000000,12.241226)}
{pt3dadd(186444.000000,205596.000000,90450.000000,21.142248)}
{pt3dadd(186156.000000,205908.000000,90100.000000,10.401022)}
{pt3dadd(186012.000000,206232.000000,90125.000000,23.902554)}
{pt3dadd(185796.000000,206484.000000,90050.000000,37.404086)}
{pt3dadd(185664.000000,206844.000000,89375.000000,46.505107)}
{pt3dadd(185352.000000,207276.000000,88900.000000,69.007660)}

{create adhoc21}
{access adhoc21}
{connect adhoc21(1), adhoc20(0)}
{nseg = 1}
{strdef color color = "White"}
{pt3dclear()}
{pt3dadd(185352.000000,207276.000000,88900.000000,69.007660)}
{pt3dadd(185184.000000,207252.000000,86025.000000,45.558427)}
{pt3dadd(184248.000000,207252.000000,85100.000000,31.800085)}
{pt3dadd(183936.000000,206928.000000,84100.000000,27.732632)}

{create adhoc22}
{access adhoc22}
{connect adhoc22(1), adhoc21(0)}
{nseg = 1}
{strdef color color = "White"}
{pt3dclear()}
{pt3dadd(183936.000000,206928.000000,84100.000000,27.732632)}
{pt3dadd(184728.000000,205548.000000,84575.000000,12.324100)}
{pt3dadd(184344.000000,205152.000000,84175.000000,7.994460)}
{pt3dadd(184080.000000,204408.000000,83725.000000,5.657729)}
{pt3dadd(184008.000000,204156.000000,83300.000000,4.409795)}
{pt3dadd(184212.000000,203640.000000,82850.000000,4.409795)}
{pt3dadd(184548.000000,203016.000000,82425.000000,4.409795)}
{pt3dadd(184704.000000,202656.000000,82025.000000,7.807479)}
{pt3dadd(184800.000000,201924.000000,81575.000000,6.455204)}
{pt3dadd(184608.000000,201336.000000,81125.000000,9.758674)}
{pt3dadd(184848.000000,200388.000000,80700.000000,9.287602)}

{create adhoc23}
{access adhoc23}
{connect adhoc23(1), adhoc22(0)}
{nseg = 1}
{strdef color color = "White"}
{pt3dclear()}
{pt3dadd(184848.000000,200388.000000,80700.000000,9.287602)}
{pt3dadd(184092.000000,201540.000000,80525.000000,6.175757)}
{pt3dadd(183816.000000,201936.000000,80425.000000,4.305454)}
{pt3dadd(183552.000000,202368.000000,80350.000000,4.305454)}
{pt3dadd(183324.000000,202632.000000,80225.000000,3.057520)}
{pt3dadd(183072.000000,203028.000000,80225.000000,3.057520)}
{pt3dadd(182832.000000,203160.000000,80250.000000,3.057520)}
{pt3dadd(182484.000000,203208.000000,80250.000000,3.653315)}
{pt3dadd(182328.000000,203364.000000,80200.000000,2.870749)}
{pt3dadd(182076.000000,203364.000000,80175.000000,3.784582)}
{pt3dadd(181860.000000,203364.000000,80150.000000,5.374770)}

{create adhoc24}
{access adhoc24}
{connect adhoc24(1), adhoc22(0)}
{nseg = 1}
{strdef color color = "White"}
{pt3dclear()}
{pt3dadd(184848.000000,200388.000000,80700.000000,9.287602)}
{pt3dadd(184944.000000,199980.000000,80475.000000,6.691735)}
{pt3dadd(185304.000000,198792.000000,80075.000000,4.615041)}
{pt3dadd(185496.000000,198420.000000,79650.000000,6.609275)}
{pt3dadd(185340.000000,197688.000000,79225.000000,5.051754)}
{pt3dadd(185244.000000,197436.000000,78850.000000,5.051754)}
{pt3dadd(185244.000000,197304.000000,78425.000000,5.051754)}
{pt3dadd(185100.000000,197052.000000,78100.000000,8.603509)}
{pt3dadd(185064.000000,196920.000000,77750.000000,5.051754)}
{pt3dadd(185064.000000,196896.000000,77425.000000,5.051754)}
{pt3dadd(185076.000000,196872.000000,77100.000000,5.051754)}
{pt3dadd(184860.000000,196764.000000,76675.000000,14.336152)}
{pt3dadd(184788.000000,196728.000000,76350.000000,10.784398)}
{pt3dadd(184692.000000,196668.000000,76000.000000,10.784398)}
{pt3dadd(184716.000000,196680.000000,75625.000000,10.784398)}
{pt3dadd(184812.000000,196776.000000,75250.000000,20.068796)}
{pt3dadd(184968.000000,196860.000000,74850.000000,10.784398)}
{pt3dadd(184944.000000,196908.000000,74400.000000,10.784398)}
{pt3dadd(185004.000000,196692.000000,73950.000000,10.784398)}
{pt3dadd(185088.000000,196176.000000,73450.000000,14.336152)}
{pt3dadd(185064.000000,195672.000000,73025.000000,5.051754)}
{pt3dadd(185124.000000,194892.000000,72625.000000,5.051754)}
{pt3dadd(185052.000000,194304.000000,72250.000000,5.051754)}
{pt3dadd(184812.000000,194064.000000,71900.000000,6.980779)}
{pt3dadd(184608.000000,193740.000000,71575.000000,3.429025)}
{pt3dadd(184368.000000,193560.000000,71225.000000,3.429025)}
{pt3dadd(184080.000000,193272.000000,70800.000000,3.429025)}
{pt3dadd(184080.000000,192912.000000,70400.000000,6.338820)}
{pt3dadd(184212.000000,192600.000000,70025.000000,5.399740)}
{pt3dadd(184188.000000,192024.000000,69650.000000,7.999567)}
{pt3dadd(183936.000000,191928.000000,69250.000000,6.449724)}

{create adhoc25}
{access adhoc25}
{connect adhoc25(1), adhoc21(0)}
{nseg = 1}
{strdef color color = "White"}
{pt3dclear()}
{pt3dadd(183936.000000,206928.000000,84100.000000,27.732632)}
{pt3dadd(182988.000000,206928.000000,81700.000000,16.163801)}
{pt3dadd(182760.000000,207768.000000,81300.000000,10.298281)}
{pt3dadd(182520.000000,207960.000000,80775.000000,15.792980)}
{pt3dadd(182304.000000,208080.000000,80350.000000,12.241226)}
{pt3dadd(182172.000000,208248.000000,79900.000000,12.241226)}
{pt3dadd(181944.000000,208476.000000,79450.000000,12.241226)}
{pt3dadd(181668.000000,208560.000000,78950.000000,21.525624)}
{pt3dadd(181344.000000,208728.000000,78525.000000,17.140230)}
{pt3dadd(181104.000000,208872.000000,77975.000000,22.386756)}
{pt3dadd(180744.000000,208980.000000,77550.000000,36.311261)}
{pt3dadd(180492.000000,208908.000000,77350.000000,27.732632)}

{create adhoc26}
{access adhoc26}
{connect adhoc26(1), adhoc25(0)}
{nseg = 1}
{strdef color color = "White"}
{pt3dclear()}
{pt3dadd(180492.000000,208908.000000,77350.000000,27.732632)}
{pt3dadd(180228.000000,207312.000000,77425.000000,12.840078)}
{pt3dadd(180240.000000,206844.000000,77225.000000,8.304047)}
{pt3dadd(180504.000000,206028.000000,77225.000000,4.047465)}
{pt3dadd(180684.000000,205848.000000,77200.000000,4.418969)}
{pt3dadd(180816.000000,205608.000000,77175.000000,6.364949)}
{pt3dadd(180864.000000,205260.000000,77225.000000,11.145123)}

{create adhoc27}
{access adhoc27}
{connect adhoc27(1), adhoc25(0)}
{nseg = 1}
{strdef color color = "White"}
{pt3dclear()}
{pt3dadd(180492.000000,208908.000000,77350.000000,27.732632)}
{pt3dadd(179712.000000,209412.000000,76800.000000,20.393541)}
{pt3dadd(179232.000000,209748.000000,76275.000000,12.836125)}
{pt3dadd(178836.000000,209832.000000,75825.000000,13.945430)}
{pt3dadd(178656.000000,209880.000000,75325.000000,7.855832)}
{pt3dadd(178248.000000,210180.000000,74800.000000,7.855832)}
{pt3dadd(177888.000000,210336.000000,74325.000000,7.855832)}
{pt3dadd(177600.000000,210012.000000,73850.000000,14.211664)}
{pt3dadd(177324.000000,209772.000000,73475.000000,7.855832)}
{pt3dadd(177156.000000,209712.000000,73000.000000,13.945430)}
{pt3dadd(176952.000000,209640.000000,72650.000000,16.855226)}
{pt3dadd(176484.000000,209568.000000,72175.000000,16.498990)}
{pt3dadd(176496.000000,209700.000000,71925.000000,16.048977)}

{create adhoc28}
{access adhoc28}
{connect adhoc28(1), adhoc27(0)}
{nseg = 1}
{strdef color color = "White"}
{pt3dclear()}
{pt3dadd(176496.000000,209700.000000,71925.000000,16.048977)}
{pt3dadd(176760.000000,210060.000000,71725.000000,13.553168)}
{pt3dadd(176916.000000,210228.000000,71350.000000,8.731901)}
{pt3dadd(176760.000000,210564.000000,70975.000000,7.751130)}
{pt3dadd(176448.000000,210864.000000,70575.000000,3.429025)}
{pt3dadd(175896.000000,211188.000000,70175.000000,3.429025)}
{pt3dadd(175008.000000,211788.000000,69800.000000,3.429025)}
{pt3dadd(174384.000000,211848.000000,69375.000000,5.803854)}
{pt3dadd(173688.000000,212076.000000,68950.000000,3.874829)}
{pt3dadd(173220.000000,211524.000000,68525.000000,3.874829)}
{pt3dadd(173208.000000,210972.000000,68150.000000,6.784625)}
{pt3dadd(173316.000000,210528.000000,67725.000000,8.032559)}
{pt3dadd(173580.000000,209880.000000,67325.000000,8.429549)}
{pt3dadd(173568.000000,209856.000000,67125.000000,7.739669)}

{create adhoc29}
{access adhoc29}
{connect adhoc29(1), adhoc27(0)}
{nseg = 1}
{strdef color color = "White"}
{pt3dclear()}
{pt3dadd(176496.000000,209700.000000,71925.000000,16.048977)}
{pt3dadd(175752.000000,209352.000000,71475.000000,12.269250)}
{pt3dadd(175236.000000,209028.000000,71050.000000,12.265404)}
{pt3dadd(173832.000000,208812.000000,70700.000000,8.673090)}
{pt3dadd(173544.000000,208632.000000,70375.000000,11.145123)}

{create adhoc30}
{access adhoc30}
{connect adhoc30(1), adhoc20(0)}
{nseg = 1}
{strdef color color = "White"}
{pt3dclear()}
{pt3dadd(185352.000000,207276.000000,88900.000000,69.007660)}
{pt3dadd(185400.000000,207468.000000,89125.000000,50.001495)}
{pt3dadd(185340.000000,207780.000000,89225.000000,30.600897)}
{pt3dadd(185388.000000,208104.000000,88575.000000,39.694453)}
{pt3dadd(185436.000000,208440.000000,87925.000000,24.095088)}
{pt3dadd(185148.000000,208740.000000,88600.000000,24.095088)}
{pt3dadd(184908.000000,209160.000000,88100.000000,24.095088)}
{pt3dadd(184692.000000,209496.000000,87800.000000,43.240950)}
{pt3dadd(184512.000000,209832.000000,87700.000000,20.645862)}
{pt3dadd(184524.000000,210240.000000,87550.000000,20.645862)}
{pt3dadd(184536.000000,210588.000000,87400.000000,20.645862)}
{pt3dadd(184332.000000,210816.000000,87475.000000,36.245227)}
{pt3dadd(184344.000000,211152.000000,87375.000000,17.099365)}
{pt3dadd(184164.000000,211512.000000,87250.000000,17.099365)}
{pt3dadd(183960.000000,211884.000000,86975.000000,17.099365)}
{pt3dadd(183756.000000,212220.000000,86700.000000,33.361203)}
{pt3dadd(183552.000000,212532.000000,86425.000000,17.761838)}
{pt3dadd(183552.000000,212784.000000,86350.000000,17.761838)}
{pt3dadd(183516.000000,213156.000000,86100.000000,17.761838)}
{pt3dadd(183480.000000,213516.000000,85850.000000,28.963115)}
{pt3dadd(183468.000000,213516.000000,85750.000000,12.701277)}
{pt3dadd(183444.000000,213840.000000,85800.000000,12.701277)}
{pt3dadd(183420.000000,214140.000000,85850.000000,12.701277)}
{pt3dadd(183324.000000,214560.000000,85625.000000,26.202809)}
{pt3dadd(183108.000000,215004.000000,85325.000000,15.001532)}
{pt3dadd(182892.000000,215532.000000,85025.000000,15.001532)}
{pt3dadd(182676.000000,215964.000000,84725.000000,15.001532)}
{pt3dadd(182508.000000,216300.000000,84775.000000,28.503064)}
{pt3dadd(182340.000000,216660.000000,84825.000000,28.503064)}
{pt3dadd(182172.000000,217104.000000,84875.000000,39.704341)}
{pt3dadd(182232.000000,217488.000000,84900.000000,65.173902)}
{pt3dadd(182028.000000,217932.000000,84525.000000,57.506386)}

{create adhoc31}
{access adhoc31}
{connect adhoc31(1), adhoc30(0)}
{nseg = 1}
{strdef color color = "White"}
{pt3dclear()}
{pt3dadd(182028.000000,217932.000000,84525.000000,57.506386)}
{pt3dadd(179868.000000,218280.000000,85850.000000,22.764663)}
{pt3dadd(179916.000000,217944.000000,86325.000000,14.258798)}
{pt3dadd(179916.000000,217704.000000,86375.000000,4.615041)}
{pt3dadd(179892.000000,217476.000000,86300.000000,3.057520)}
{pt3dadd(179916.000000,217140.000000,86200.000000,3.057520)}
{pt3dadd(179976.000000,216792.000000,86100.000000,4.615041)}
{pt3dadd(180072.000000,216588.000000,86100.000000,5.604986)}
{pt3dadd(180156.000000,216312.000000,85950.000000,5.745775)}
{pt3dadd(180156.000000,216000.000000,85875.000000,6.449724)}

{create adhoc32}
{access adhoc32}
{connect adhoc32(1), adhoc30(0)}
{nseg = 1}
{strdef color color = "White"}
{pt3dclear()}
{pt3dadd(182028.000000,217932.000000,84525.000000,57.506386)}
{pt3dadd(181620.000000,218220.000000,84225.000000,57.506386)}
{pt3dadd(181380.000000,218556.000000,84250.000000,57.506386)}
{pt3dadd(181356.000000,218700.000000,84250.000000,57.506386)}

{create adhoc33}
{access adhoc33}
{connect adhoc33(1), adhoc32(0)}
{nseg = 1}
{strdef color color = "White"}
{pt3dclear()}
{pt3dadd(181356.000000,218700.000000,84250.000000,57.506386)}
{pt3dadd(179604.000000,218772.000000,85575.000000,23.383836)}
{pt3dadd(179196.000000,218988.000000,85875.000000,14.630302)}
{pt3dadd(178956.000000,219204.000000,86275.000000,5.803854)}
{pt3dadd(178788.000000,219432.000000,86725.000000,3.874829)}
{pt3dadd(178740.000000,219456.000000,87050.000000,3.874829)}
{pt3dadd(178164.000000,219816.000000,87275.000000,3.874829)}
{pt3dadd(178056.000000,220044.000000,87700.000000,6.784625)}
{pt3dadd(177948.000000,220068.000000,88075.000000,4.409795)}
{pt3dadd(177816.000000,220188.000000,88450.000000,4.409795)}
{pt3dadd(177780.000000,220152.000000,88700.000000,4.409795)}
{pt3dadd(177900.000000,220200.000000,89100.000000,6.784625)}
{pt3dadd(178368.000000,220356.000000,89500.000000,5.803854)}
{pt3dadd(178896.000000,220788.000000,89925.000000,8.673090)}
{pt3dadd(179256.000000,221172.000000,90225.000000,11.145123)}

{create adhoc34}
{access adhoc34}
{connect adhoc34(1), adhoc32(0)}
{nseg = 1}
{strdef color color = "White"}
{pt3dclear()}
{pt3dadd(181356.000000,218700.000000,84250.000000,57.506386)}
{pt3dadd(181260.000000,219048.000000,83950.000000,41.751245)}
{pt3dadd(181128.000000,219300.000000,83650.000000,25.650747)}
{pt3dadd(180840.000000,219624.000000,83350.000000,27.951002)}
{pt3dadd(180660.000000,220056.000000,83275.000000,15.001532)}
{pt3dadd(180480.000000,220344.000000,83200.000000,15.001532)}
{pt3dadd(180168.000000,220848.000000,82925.000000,15.001532)}
{pt3dadd(179856.000000,221052.000000,82850.000000,28.503064)}
{pt3dadd(179460.000000,221412.000000,82575.000000,15.001532)}
{pt3dadd(179148.000000,221748.000000,82325.000000,26.202809)}
{pt3dadd(178800.000000,222108.000000,81900.000000,37.404086)}
{pt3dadd(178368.000000,222276.000000,81925.000000,38.837591)}
{pt3dadd(178140.000000,222480.000000,81975.000000,57.506386)}

{create adhoc35}
{access adhoc35}
{connect adhoc35(1), adhoc34(0)}
{nseg = 1}
{strdef color color = "White"}
{pt3dclear()}
{pt3dadd(178140.000000,222480.000000,81975.000000,57.506386)}
{pt3dadd(178020.000000,221196.000000,83225.000000,24.126844)}
{pt3dadd(177408.000000,221472.000000,83825.000000,15.076107)}
{pt3dadd(177144.000000,221784.000000,84025.000000,6.784625)}
{pt3dadd(176892.000000,221976.000000,84350.000000,4.409795)}
{pt3dadd(176628.000000,222336.000000,84875.000000,4.409795)}
{pt3dadd(176196.000000,222732.000000,85125.000000,4.409795)}
{pt3dadd(176016.000000,222828.000000,85050.000000,7.961550)}
{pt3dadd(175716.000000,223128.000000,85150.000000,5.051754)}
{pt3dadd(175404.000000,223332.000000,85250.000000,5.051754)}
{pt3dadd(175080.000000,223680.000000,85175.000000,5.051754)}
{pt3dadd(174792.000000,223812.000000,85175.000000,5.826708)}
{pt3dadd(174480.000000,223932.000000,85175.000000,2.274954)}
{pt3dadd(174240.000000,224292.000000,85100.000000,2.274954)}
{pt3dadd(174048.000000,224568.000000,85075.000000,2.274954)}
{pt3dadd(173892.000000,224820.000000,85100.000000,3.832474)}
{pt3dadd(173208.000000,225504.000000,85025.000000,3.057520)}
{pt3dadd(172932.000000,225900.000000,85075.000000,4.615041)}
{pt3dadd(172788.000000,226164.000000,84900.000000,6.989870)}
{pt3dadd(172584.000000,226320.000000,84875.000000,8.053916)}
{pt3dadd(172464.000000,226332.000000,84900.000000,13.374147)}

{create adhoc36}
{access adhoc36}
{connect adhoc36(1), adhoc34(0)}
{nseg = 1}
{strdef color color = "White"}
{pt3dclear()}
{pt3dadd(178140.000000,222480.000000,81975.000000,57.506386)}
{pt3dadd(177744.000000,222864.000000,81650.000000,38.070840)}
{pt3dadd(177396.000000,223212.000000,81175.000000,23.442504)}
{pt3dadd(177024.000000,223308.000000,81100.000000,25.190699)}
{pt3dadd(176568.000000,223500.000000,80600.000000,14.449472)}
{pt3dadd(176148.000000,223932.000000,80375.000000,14.449472)}
{pt3dadd(175752.000000,224136.000000,80150.000000,14.449472)}
{pt3dadd(175356.000000,224592.000000,79925.000000,27.951004)}
{pt3dadd(174960.000000,224832.000000,79550.000000,15.001532)}
{pt3dadd(174540.000000,225216.000000,79300.000000,15.001532)}
{pt3dadd(174048.000000,225552.000000,79000.000000,15.001532)}
{pt3dadd(173676.000000,225648.000000,78700.000000,26.202809)}
{pt3dadd(173292.000000,225768.000000,78325.000000,12.701277)}
{pt3dadd(172968.000000,225864.000000,78325.000000,12.701277)}
{pt3dadd(172584.000000,225864.000000,78175.000000,12.701277)}
{pt3dadd(172176.000000,226020.000000,78100.000000,23.442503)}
{pt3dadd(171900.000000,226104.000000,77950.000000,21.525624)}
{pt3dadd(171600.000000,226128.000000,77825.000000,30.810022)}
{pt3dadd(171360.000000,226224.000000,77675.000000,50.350037)}
{pt3dadd(171036.000000,226344.000000,77525.000000,47.921990)}

{create adhoc37}
{access adhoc37}
{connect adhoc37(1), adhoc36(0)}
{nseg = 1}
{strdef color color = "White"}
{pt3dclear()}
{pt3dadd(171036.000000,226344.000000,77525.000000,47.921990)}
{pt3dadd(170616.000000,226236.000000,77100.000000,35.642792)}
{pt3dadd(170364.000000,226104.000000,76575.000000,21.985675)}
{pt3dadd(170064.000000,226200.000000,76625.000000,21.985675)}
{pt3dadd(169716.000000,226368.000000,76525.000000,10.784398)}
{pt3dadd(169428.000000,226272.000000,76300.000000,10.784398)}
{pt3dadd(169152.000000,226368.000000,76075.000000,10.784398)}
{pt3dadd(168636.000000,226332.000000,75700.000000,21.525624)}
{pt3dadd(168192.000000,226188.000000,75400.000000,21.525624)}
{pt3dadd(167892.000000,226236.000000,75150.000000,32.726901)}
{pt3dadd(167604.000000,226200.000000,74900.000000,53.544835)}
{pt3dadd(167400.000000,225984.000000,74475.000000,57.506386)}

{create adhoc38}
{access adhoc38}
{connect adhoc38(1), adhoc37(0)}
{nseg = 1}
{strdef color color = "White"}
{pt3dclear()}
{pt3dadd(167400.000000,225984.000000,74475.000000,57.506386)}
{pt3dadd(167028.000000,225984.000000,73900.000000,42.671349)}
{pt3dadd(166608.000000,225960.000000,73900.000000,26.202809)}
{pt3dadd(166308.000000,225936.000000,73975.000000,24.285930)}
{pt3dadd(166008.000000,225912.000000,73925.000000,10.784398)}
{pt3dadd(165720.000000,225924.000000,73925.000000,10.784398)}
{pt3dadd(165420.000000,225972.000000,73900.000000,10.784398)}
{pt3dadd(165168.000000,225948.000000,73825.000000,20.068796)}
{pt3dadd(164856.000000,225804.000000,73625.000000,10.784398)}
{pt3dadd(164580.000000,225852.000000,73475.000000,10.784398)}
{pt3dadd(164304.000000,225864.000000,73325.000000,10.784398)}
{pt3dadd(163920.000000,225864.000000,73250.000000,20.068796)}
{pt3dadd(163596.000000,225804.000000,73250.000000,10.784398)}
{pt3dadd(163212.000000,225816.000000,73250.000000,10.784398)}
{pt3dadd(162852.000000,225504.000000,72950.000000,10.784398)}
{pt3dadd(162468.000000,225396.000000,72800.000000,20.068796)}
{pt3dadd(162048.000000,225516.000000,72800.000000,10.784398)}
{pt3dadd(161808.000000,225612.000000,72800.000000,10.784398)}
{pt3dadd(161508.000000,225516.000000,72800.000000,10.784398)}
{pt3dadd(161112.000000,225648.000000,72575.000000,20.068796)}
{pt3dadd(160800.000000,225648.000000,72350.000000,17.140230)}
{pt3dadd(160524.000000,225516.000000,72375.000000,23.229828)}
{pt3dadd(160116.000000,225456.000000,72350.000000,37.716381)}
{pt3dadd(159696.000000,225288.000000,72075.000000,31.947992)}

{create adhoc39}
{access adhoc39}
{connect adhoc39(1), adhoc38(0)}
{nseg = 1}
{strdef color color = "White"}
{pt3dclear()}
{pt3dadd(159696.000000,225288.000000,72075.000000,31.947992)}
{pt3dadd(159444.000000,224748.000000,72250.000000,22.242384)}
{pt3dadd(159096.000000,224544.000000,72200.000000,13.945430)}
{pt3dadd(158772.000000,224196.000000,72000.000000,14.211664)}
{pt3dadd(158508.000000,224028.000000,71900.000000,7.855832)}
{pt3dadd(158232.000000,224112.000000,71725.000000,7.855832)}
{pt3dadd(157956.000000,224124.000000,71550.000000,7.855832)}
{pt3dadd(157668.000000,223656.000000,71450.000000,14.211664)}
{pt3dadd(157344.000000,223488.000000,71150.000000,7.855832)}
{pt3dadd(157020.000000,223272.000000,71000.000000,7.855832)}
{pt3dadd(156900.000000,222840.000000,70950.000000,7.855832)}
{pt3dadd(156732.000000,222468.000000,70725.000000,13.102358)}
{pt3dadd(156516.000000,222096.000000,70225.000000,6.746526)}
{pt3dadd(156348.000000,221712.000000,69600.000000,6.746526)}
{pt3dadd(155988.000000,221400.000000,68975.000000,6.746526)}
{pt3dadd(155748.000000,221124.000000,68650.000000,13.102358)}
{pt3dadd(155712.000000,220776.000000,68375.000000,7.855832)}
{pt3dadd(155652.000000,220488.000000,68075.000000,7.855832)}
{pt3dadd(155460.000000,220188.000000,67750.000000,7.855832)}
{pt3dadd(155220.000000,219900.000000,67425.000000,15.542830)}
{pt3dadd(155112.000000,219636.000000,67375.000000,9.186998)}
{pt3dadd(154968.000000,219336.000000,67025.000000,9.186998)}
{pt3dadd(154824.000000,219084.000000,66650.000000,9.186998)}
{pt3dadd(154692.000000,218796.000000,66350.000000,15.542830)}
{pt3dadd(154080.000000,218472.000000,65725.000000,7.855832)}
{pt3dadd(153756.000000,217848.000000,65200.000000,7.855832)}
{pt3dadd(153504.000000,217344.000000,64650.000000,7.855832)}
{pt3dadd(153180.000000,217068.000000,64000.000000,13.102358)}
{pt3dadd(152748.000000,216564.000000,63475.000000,6.746526)}
{pt3dadd(152604.000000,216024.000000,63000.000000,6.746526)}
{pt3dadd(152172.000000,215700.000000,62475.000000,6.746526)}
{pt3dadd(151884.000000,214896.000000,61975.000000,14.433524)}
{pt3dadd(151692.000000,214284.000000,61325.000000,9.186998)}
{pt3dadd(151716.000000,213852.000000,60850.000000,9.186998)}
{pt3dadd(151728.000000,213192.000000,60350.000000,9.186998)}
{pt3dadd(151500.000000,212916.000000,59975.000000,16.873996)}
{pt3dadd(151380.000000,212400.000000,59475.000000,9.186998)}
{pt3dadd(151284.000000,211692.000000,59050.000000,9.186998)}
{pt3dadd(151284.000000,211188.000000,58500.000000,9.186998)}
{pt3dadd(151260.000000,210492.000000,57875.000000,18.088020)}
{pt3dadd(151128.000000,209724.000000,57250.000000,10.401022)}
{pt3dadd(151188.000000,209112.000000,56750.000000,10.401022)}
{pt3dadd(151452.000000,208764.000000,56225.000000,10.401022)}
{pt3dadd(151668.000000,208332.000000,55725.000000,19.685420)}
{pt3dadd(151932.000000,208092.000000,55225.000000,10.784398)}
{pt3dadd(152124.000000,207504.000000,54750.000000,20.068796)}
{pt3dadd(152388.000000,207216.000000,54350.000000,29.353194)}
{pt3dadd(152556.000000,206856.000000,53900.000000,32.447993)}
{pt3dadd(152580.000000,206412.000000,53450.000000,47.921990)}

{create adhoc40}
{access adhoc40}
{connect adhoc40(1), adhoc39(0)}
{nseg = 1}
{strdef color color = "White"}
{pt3dclear()}
{pt3dadd(152580.000000,206412.000000,53450.000000,47.921990)}
{pt3dadd(152844.000000,206268.000000,53000.000000,29.785660)}
{pt3dadd(152904.000000,206160.000000,52475.000000,18.471396)}
{pt3dadd(152916.000000,205716.000000,52000.000000,18.471396)}
{pt3dadd(153000.000000,205440.000000,51450.000000,10.784398)}
{pt3dadd(153300.000000,205152.000000,51025.000000,19.685420)}
{pt3dadd(153600.000000,204912.000000,50450.000000,26.041252)}
{pt3dadd(153828.000000,204828.000000,49975.000000,26.928089)}
{pt3dadd(153948.000000,204180.000000,49450.000000,33.279160)}

{create adhoc41}
{access adhoc41}
{connect adhoc41(1), adhoc40(0)}
{nseg = 1}
{strdef color color = "White"}
{pt3dclear()}
{pt3dadd(153948.000000,204180.000000,49450.000000,33.279160)}
{pt3dadd(154548.000000,203196.000000,49075.000000,22.242384)}
{pt3dadd(154848.000000,202620.000000,48575.000000,13.945430)}
{pt3dadd(155112.000000,202344.000000,48250.000000,15.276596)}
{pt3dadd(155280.000000,202140.000000,47775.000000,9.186998)}
{pt3dadd(155544.000000,201828.000000,47275.000000,9.186998)}
{pt3dadd(155736.000000,201348.000000,46750.000000,9.186998)}
{pt3dadd(156000.000000,200880.000000,46250.000000,14.433524)}
{pt3dadd(156300.000000,200364.000000,45750.000000,6.746526)}
{pt3dadd(156648.000000,199848.000000,45175.000000,6.746526)}
{pt3dadd(156936.000000,199368.000000,44650.000000,11.068632)}
{pt3dadd(157284.000000,199008.000000,44125.000000,14.620386)}
{pt3dadd(157500.000000,198504.000000,43600.000000,14.623100)}
{pt3dadd(157968.000000,198024.000000,43050.000000,19.258772)}

{create adhoc42}
{access adhoc42}
{connect adhoc42(1), adhoc41(0)}
{nseg = 1}
{strdef color color = "White"}
{pt3dclear()}
{pt3dadd(157968.000000,198024.000000,43050.000000,19.258772)}
{pt3dadd(158196.000000,197736.000000,42750.000000,14.623100)}
{pt3dadd(158436.000000,197304.000000,42175.000000,9.373860)}
{pt3dadd(158772.000000,196248.000000,41650.000000,9.373860)}
{pt3dadd(159180.000000,195660.000000,41275.000000,5.051754)}
{pt3dadd(159420.000000,195252.000000,40875.000000,5.051754)}
{pt3dadd(159588.000000,194568.000000,40475.000000,5.051754)}
{pt3dadd(159852.000000,194136.000000,40050.000000,6.980779)}
{pt3dadd(160140.000000,193740.000000,39675.000000,5.358049)}
{pt3dadd(160728.000000,192624.000000,39125.000000,7.930082)}
{pt3dadd(160860.000000,191784.000000,38975.000000,11.145123)}

{create adhoc43}
{access adhoc43}
{connect adhoc43(1), adhoc42(0)}
{nseg = 1}
{strdef color color = "White"}
{pt3dclear()}
{pt3dadd(160860.000000,191784.000000,38975.000000,11.145123)}
{pt3dadd(160500.000000,190644.000000,39275.000000,8.673090)}
{pt3dadd(159888.000000,189336.000000,39275.000000,5.803854)}
{pt3dadd(159768.000000,189156.000000,39500.000000,6.784625)}
{pt3dadd(159408.000000,188892.000000,39650.000000,4.409795)}
{pt3dadd(159312.000000,188652.000000,39875.000000,4.409795)}
{pt3dadd(159096.000000,188388.000000,39800.000000,4.409795)}
{pt3dadd(158952.000000,188160.000000,39800.000000,5.399740)}
{pt3dadd(159072.000000,187968.000000,39850.000000,3.085740)}
{pt3dadd(159084.000000,187752.000000,39800.000000,4.212316)}
{pt3dadd(159144.000000,187524.000000,39750.000000,6.020526)}
{pt3dadd(159204.000000,187296.000000,39725.000000,7.132879)}

{create adhoc44}
{access adhoc44}
{connect adhoc44(1), adhoc42(0)}
{nseg = 1}
{strdef color color = "White"}
{pt3dclear()}
{pt3dadd(160860.000000,191784.000000,38975.000000,11.145123)}
{pt3dadd(161460.000000,192012.000000,38575.000000,9.564700)}
{pt3dadd(162036.000000,191556.000000,38200.000000,6.338820)}
{pt3dadd(162348.000000,190620.000000,37700.000000,7.961550)}
{pt3dadd(162912.000000,190812.000000,36875.000000,8.603509)}
{pt3dadd(163548.000000,190716.000000,36225.000000,13.339181)}
{pt3dadd(163668.000000,190584.000000,35975.000000,19.258772)}

{create adhoc45}
{access adhoc45}
{connect adhoc45(1), adhoc41(0)}
{nseg = 1}
{strdef color color = "White"}
{pt3dclear()}
{pt3dadd(157968.000000,198024.000000,43050.000000,19.258772)}
{pt3dadd(158052.000000,196908.000000,43375.000000,10.634632)}
{pt3dadd(158004.000000,196584.000000,43725.000000,6.980779)}
{pt3dadd(158280.000000,196176.000000,44275.000000,4.203979)}
{pt3dadd(158280.000000,195708.000000,44650.000000,3.049908)}
{pt3dadd(157296.000000,195420.000000,44650.000000,4.607428)}
{pt3dadd(156612.000000,195072.000000,44375.000000,6.679047)}
{pt3dadd(156732.000000,194880.000000,44225.000000,9.287602)}

{create adhoc46}
{access adhoc46}
{connect adhoc46(1), adhoc40(0)}
{nseg = 1}
{strdef color color = "White"}
{pt3dclear()}
{pt3dadd(153948.000000,204180.000000,49450.000000,33.279160)}
{pt3dadd(153912.000000,205368.000000,49225.000000,24.904717)}
{pt3dadd(153936.000000,205644.000000,48650.000000,15.542830)}
{pt3dadd(153948.000000,205908.000000,48125.000000,13.509103)}
{pt3dadd(154104.000000,205992.000000,47625.000000,5.822105)}
{pt3dadd(154128.000000,206040.000000,47225.000000,5.822105)}
{pt3dadd(154296.000000,205932.000000,46775.000000,5.822105)}
{pt3dadd(154308.000000,206244.000000,46325.000000,9.373860)}
{pt3dadd(154692.000000,206328.000000,45800.000000,5.051754)}
{pt3dadd(155256.000000,206076.000000,45325.000000,5.051754)}
{pt3dadd(155592.000000,205908.000000,44900.000000,5.051754)}
{pt3dadd(156060.000000,205800.000000,44575.000000,8.603509)}
{pt3dadd(156084.000000,205620.000000,44200.000000,5.051754)}
{pt3dadd(156312.000000,205452.000000,43900.000000,5.051754)}
{pt3dadd(156444.000000,205176.000000,43550.000000,5.051754)}
{pt3dadd(156744.000000,205080.000000,43250.000000,7.961550)}
{pt3dadd(157008.000000,204576.000000,42925.000000,4.409795)}
{pt3dadd(157236.000000,204036.000000,42575.000000,4.409795)}
{pt3dadd(157368.000000,203724.000000,42275.000000,4.409795)}
{pt3dadd(157788.000000,203436.000000,41850.000000,6.784625)}
{pt3dadd(158388.000000,203112.000000,41475.000000,3.874829)}
{pt3dadd(158652.000000,202344.000000,40925.000000,3.874829)}
{pt3dadd(159372.000000,201432.000000,40400.000000,3.874829)}
{pt3dadd(159540.000000,200580.000000,40250.000000,5.432350)}
{pt3dadd(160044.000000,199740.000000,40025.000000,3.057520)}
{pt3dadd(160548.000000,199200.000000,39525.000000,3.057520)}
{pt3dadd(160884.000000,198504.000000,39350.000000,3.057520)}
{pt3dadd(161112.000000,198000.000000,38950.000000,7.379626)}
{pt3dadd(161316.000000,197268.000000,38550.000000,5.822105)}
{pt3dadd(161532.000000,196956.000000,38175.000000,5.822105)}
{pt3dadd(161880.000000,196380.000000,37875.000000,5.822105)}
{pt3dadd(161976.000000,196164.000000,37775.000000,8.731901)}
{pt3dadd(161988.000000,195924.000000,37550.000000,4.409795)}
{pt3dadd(162216.000000,195720.000000,37475.000000,4.409795)}
{pt3dadd(162264.000000,195552.000000,37350.000000,4.409795)}
{pt3dadd(162240.000000,195360.000000,37250.000000,6.677632)}
{pt3dadd(162144.000000,195156.000000,37175.000000,4.953853)}
{pt3dadd(162276.000000,194964.000000,37150.000000,6.511373)}
{pt3dadd(162324.000000,194640.000000,36775.000000,9.852289)}
{pt3dadd(162336.000000,194448.000000,36775.000000,9.287602)}

{create adhoc47}
{access adhoc47}
{connect adhoc47(1), adhoc39(0)}
{nseg = 1}
{strdef color color = "White"}
{pt3dclear()}
{pt3dadd(152580.000000,206412.000000,53450.000000,47.921990)}
{pt3dadd(152820.000000,205536.000000,53575.000000,20.189038)}
{pt3dadd(153420.000000,204612.000000,53575.000000,12.713423)}
{pt3dadd(153612.000000,204336.000000,53600.000000,4.676958)}
{pt3dadd(153852.000000,204060.000000,53450.000000,3.737879)}
{pt3dadd(153816.000000,203748.000000,53375.000000,4.676226)}
{pt3dadd(153876.000000,203460.000000,53375.000000,6.793709)}
{pt3dadd(154380.000000,203592.000000,53100.000000,6.191735)}

{create adhoc48}
{access adhoc48}
{connect adhoc48(1), adhoc38(0)}
{nseg = 1}
{strdef color color = "White"}
{pt3dclear()}
{pt3dadd(159696.000000,225288.000000,72075.000000,31.947992)}
{pt3dadd(159708.000000,226644.000000,71525.000000,17.568921)}
{pt3dadd(159396.000000,226728.000000,71425.000000,11.141353)}
{pt3dadd(159108.000000,226776.000000,71275.000000,10.298281)}
{pt3dadd(158808.000000,226800.000000,71200.000000,6.746526)}
{pt3dadd(158508.000000,226764.000000,71100.000000,6.746526)}
{pt3dadd(158280.000000,226776.000000,71175.000000,6.746526)}
{pt3dadd(157968.000000,226968.000000,71225.000000,11.993053)}
{pt3dadd(157704.000000,227100.000000,71175.000000,6.746526)}
{pt3dadd(157428.000000,227196.000000,71175.000000,6.746526)}
{pt3dadd(157152.000000,227280.000000,71125.000000,6.746526)}
{pt3dadd(156840.000000,227292.000000,71025.000000,13.102358)}
{pt3dadd(156540.000000,227304.000000,70875.000000,7.855832)}
{pt3dadd(156324.000000,227436.000000,70775.000000,7.855832)}
{pt3dadd(156012.000000,227532.000000,70775.000000,7.855832)}
{pt3dadd(155808.000000,227664.000000,70775.000000,14.211664)}
{pt3dadd(155568.000000,227712.000000,70750.000000,7.855832)}
{pt3dadd(155280.000000,227712.000000,70700.000000,7.855832)}
{pt3dadd(155136.000000,227736.000000,70625.000000,7.855832)}
{pt3dadd(154824.000000,227904.000000,70400.000000,15.542830)}
{pt3dadd(154620.000000,227952.000000,70275.000000,16.873996)}
{pt3dadd(154440.000000,228108.000000,70300.000000,27.123327)}
{pt3dadd(154176.000000,228048.000000,70175.000000,39.934990)}

{create adhoc49}
{access adhoc49}
{connect adhoc49(1), adhoc48(0)}
{nseg = 1}
{strdef color color = "White"}
{pt3dclear()}
{pt3dadd(154176.000000,228048.000000,70175.000000,39.934990)}
{pt3dadd(153888.000000,228276.000000,70000.000000,27.123327)}
{pt3dadd(153672.000000,228336.000000,69800.000000,16.873996)}
{pt3dadd(153468.000000,228312.000000,69750.000000,16.873996)}
{pt3dadd(153216.000000,228468.000000,69625.000000,9.186998)}
{pt3dadd(152976.000000,228552.000000,69300.000000,9.186998)}
{pt3dadd(152688.000000,228684.000000,68850.000000,9.186998)}
{pt3dadd(152532.000000,228840.000000,68750.000000,18.471396)}
{pt3dadd(152304.000000,228936.000000,68475.000000,18.471396)}
{pt3dadd(152088.000000,229140.000000,68225.000000,27.755794)}
{pt3dadd(151860.000000,229296.000000,67800.000000,45.259657)}
{pt3dadd(151740.000000,229500.000000,67575.000000,47.921990)}

{create adhoc50}
{access adhoc50}
{connect adhoc50(1), adhoc49(0)}
{nseg = 1}
{strdef color color = "White"}
{pt3dclear()}
{pt3dadd(151740.000000,229500.000000,67575.000000,47.921990)}
{pt3dadd(151392.000000,229440.000000,67275.000000,29.253192)}
{pt3dadd(151104.000000,229284.000000,66425.000000,18.151915)}
{pt3dadd(150924.000000,229476.000000,65850.000000,20.068794)}
{pt3dadd(150672.000000,229740.000000,64150.000000,12.701277)}
{pt3dadd(150564.000000,229836.000000,63600.000000,12.701277)}
{pt3dadd(150600.000000,229800.000000,63225.000000,12.701277)}
{pt3dadd(150600.000000,229488.000000,62750.000000,20.388275)}
{pt3dadd(150528.000000,229356.000000,62325.000000,9.186998)}
{pt3dadd(150492.000000,229248.000000,61925.000000,9.186998)}
{pt3dadd(150396.000000,229176.000000,61550.000000,9.186998)}
{pt3dadd(150420.000000,229188.000000,61150.000000,19.928224)}
{pt3dadd(150420.000000,229164.000000,60725.000000,12.241226)}
{pt3dadd(150504.000000,228840.000000,60325.000000,12.241226)}
{pt3dadd(150540.000000,228768.000000,59900.000000,12.241226)}
{pt3dadd(150624.000000,228492.000000,59475.000000,23.442503)}
{pt3dadd(150696.000000,228360.000000,59075.000000,12.701277)}
{pt3dadd(150816.000000,228252.000000,58775.000000,12.701277)}
{pt3dadd(150876.000000,228048.000000,58275.000000,12.701277)}
{pt3dadd(151044.000000,228048.000000,57725.000000,19.057109)}
{pt3dadd(151272.000000,227724.000000,57225.000000,7.855832)}
{pt3dadd(151380.000000,227616.000000,56750.000000,7.855832)}
{pt3dadd(151584.000000,227424.000000,56200.000000,7.855832)}
{pt3dadd(151896.000000,227256.000000,55650.000000,13.102358)}
{pt3dadd(152196.000000,227148.000000,55175.000000,6.746526)}
{pt3dadd(152592.000000,226980.000000,54650.000000,6.746526)}
{pt3dadd(152940.000000,226548.000000,54125.000000,6.746526)}
{pt3dadd(153240.000000,226224.000000,53600.000000,13.102358)}
{pt3dadd(153492.000000,225672.000000,53150.000000,7.855832)}
{pt3dadd(153768.000000,225300.000000,52675.000000,7.855832)}
{pt3dadd(154032.000000,224832.000000,52175.000000,7.855832)}
{pt3dadd(154188.000000,224688.000000,51900.000000,13.945430)}
{pt3dadd(154428.000000,224544.000000,51525.000000,7.589598)}
{pt3dadd(154668.000000,224268.000000,51125.000000,7.589598)}
{pt3dadd(154776.000000,223992.000000,50750.000000,7.589598)}
{pt3dadd(154992.000000,223740.000000,50325.000000,12.836125)}
{pt3dadd(155232.000000,223488.000000,49975.000000,6.746526)}
{pt3dadd(155388.000000,223320.000000,49550.000000,6.746526)}
{pt3dadd(155616.000000,223116.000000,49175.000000,6.746526)}
{pt3dadd(155772.000000,222744.000000,48800.000000,11.993053)}
{pt3dadd(155928.000000,222528.000000,48375.000000,6.746526)}
{pt3dadd(156240.000000,222324.000000,47925.000000,6.746526)}
{pt3dadd(156516.000000,222048.000000,47550.000000,6.746526)}
{pt3dadd(156696.000000,221616.000000,47125.000000,11.993053)}
{pt3dadd(156996.000000,221100.000000,46750.000000,6.746526)}
{pt3dadd(157284.000000,220824.000000,46325.000000,6.746526)}
{pt3dadd(157584.000000,220356.000000,45925.000000,6.746526)}
{pt3dadd(157980.000000,219696.000000,45550.000000,11.068632)}
{pt3dadd(158292.000000,219156.000000,45150.000000,5.822105)}
{pt3dadd(158532.000000,218748.000000,44775.000000,5.822105)}
{pt3dadd(158628.000000,218376.000000,44450.000000,5.822105)}
{pt3dadd(158976.000000,217788.000000,44075.000000,11.068632)}
{pt3dadd(159324.000000,217284.000000,43675.000000,6.746526)}
{pt3dadd(159768.000000,216852.000000,43275.000000,6.746526)}
{pt3dadd(159996.000000,216504.000000,42900.000000,6.746526)}
{pt3dadd(160344.000000,216108.000000,42525.000000,11.068632)}
{pt3dadd(160536.000000,215640.000000,42125.000000,5.822105)}
{pt3dadd(160728.000000,215208.000000,41775.000000,5.822105)}
{pt3dadd(161148.000000,214500.000000,41350.000000,5.822105)}
{pt3dadd(161532.000000,214068.000000,40925.000000,10.144211)}
{pt3dadd(161844.000000,213264.000000,40550.000000,5.822105)}
{pt3dadd(162180.000000,212460.000000,40125.000000,5.822105)}
{pt3dadd(162636.000000,211536.000000,39675.000000,5.822105)}
{pt3dadd(162816.000000,211356.000000,39675.000000,10.144211)}
{pt3dadd(162816.000000,211140.000000,39600.000000,11.068632)}
{pt3dadd(162984.000000,210876.000000,39475.000000,13.978427)}
{pt3dadd(163188.000000,210612.000000,39350.000000,22.297379)}
{pt3dadd(163188.000000,210288.000000,39325.000000,16.048977)}

{create adhoc51}
{access adhoc51}
{connect adhoc51(1), adhoc50(0)}
{nseg = 1}
{strdef color color = "White"}
{pt3dclear()}
{pt3dadd(163188.000000,210288.000000,39325.000000,16.048977)}
{pt3dadd(162984.000000,210036.000000,39675.000000,11.765954)}
{pt3dadd(163104.000000,209832.000000,39725.000000,7.659572)}
{pt3dadd(163080.000000,209604.000000,39675.000000,7.659572)}
{pt3dadd(163080.000000,209388.000000,39625.000000,4.409795)}
{pt3dadd(163164.000000,209148.000000,39625.000000,4.409795)}
{pt3dadd(163356.000000,208932.000000,39450.000000,4.409795)}
{pt3dadd(163488.000000,208728.000000,39425.000000,6.338820)}
{pt3dadd(163500.000000,208512.000000,39400.000000,3.429025)}
{pt3dadd(163476.000000,208344.000000,39275.000000,3.429025)}
{pt3dadd(163536.000000,208164.000000,39200.000000,3.429025)}
{pt3dadd(163596.000000,207972.000000,39175.000000,4.986545)}
{pt3dadd(163572.000000,207744.000000,39200.000000,3.057520)}
{pt3dadd(163620.000000,207552.000000,39125.000000,3.057520)}
{pt3dadd(163644.000000,207360.000000,39150.000000,3.057520)}
{pt3dadd(163608.000000,207156.000000,39100.000000,5.715668)}
{pt3dadd(163704.000000,206964.000000,39075.000000,4.158148)}
{pt3dadd(163716.000000,206724.000000,39050.000000,4.158148)}
{pt3dadd(163656.000000,206544.000000,38975.000000,4.158148)}
{pt3dadd(163776.000000,206256.000000,38825.000000,5.715668)}
{pt3dadd(163824.000000,206016.000000,38750.000000,3.057520)}
{pt3dadd(163920.000000,205776.000000,38550.000000,3.057520)}
{pt3dadd(163896.000000,205560.000000,38550.000000,3.057520)}
{pt3dadd(163980.000000,205368.000000,38525.000000,4.615041)}
{pt3dadd(164004.000000,205176.000000,38450.000000,3.057520)}
{pt3dadd(164016.000000,204996.000000,38375.000000,3.057520)}
{pt3dadd(164064.000000,204852.000000,38375.000000,3.057520)}
{pt3dadd(163992.000000,204684.000000,38375.000000,5.967316)}
{pt3dadd(163956.000000,204468.000000,38275.000000,4.409795)}
{pt3dadd(164088.000000,204276.000000,38200.000000,4.409795)}
{pt3dadd(164148.000000,204072.000000,38150.000000,4.409795)}
{pt3dadd(164148.000000,203868.000000,38075.000000,6.784625)}
{pt3dadd(164160.000000,203580.000000,38050.000000,3.874829)}
{pt3dadd(164016.000000,203352.000000,38050.000000,3.874829)}
{pt3dadd(164028.000000,203100.000000,37825.000000,3.874829)}
{pt3dadd(164520.000000,202668.000000,37550.000000,5.803854)}
{pt3dadd(164820.000000,202032.000000,37475.000000,3.429025)}
{pt3dadd(165108.000000,201756.000000,37175.000000,3.429025)}
{pt3dadd(165276.000000,201420.000000,37025.000000,3.429025)}
{pt3dadd(165852.000000,201552.000000,36700.000000,6.338820)}
{pt3dadd(166212.000000,201120.000000,36250.000000,4.409795)}
{pt3dadd(166596.000000,200712.000000,35875.000000,4.409795)}
{pt3dadd(166716.000000,200520.000000,35575.000000,4.409795)}
{pt3dadd(166872.000000,200304.000000,35400.000000,7.319591)}
{pt3dadd(167136.000000,200088.000000,35325.000000,4.409795)}
{pt3dadd(167436.000000,199896.000000,35050.000000,4.409795)}
{pt3dadd(167712.000000,199668.000000,35000.000000,4.409795)}
{pt3dadd(167832.000000,199488.000000,34825.000000,7.319591)}
{pt3dadd(167808.000000,199284.000000,34600.000000,4.409795)}
{pt3dadd(167940.000000,199080.000000,34600.000000,4.409795)}
{pt3dadd(168180.000000,198648.000000,34600.000000,4.409795)}
{pt3dadd(168384.000000,198444.000000,34375.000000,7.961550)}
{pt3dadd(168588.000000,198228.000000,34225.000000,5.051754)}
{pt3dadd(168636.000000,198000.000000,34075.000000,5.051754)}
{pt3dadd(168996.000000,197376.000000,34075.000000,5.051754)}
{pt3dadd(169296.000000,196752.000000,33625.000000,6.609275)}
{pt3dadd(169716.000000,196512.000000,33400.000000,3.057520)}
{pt3dadd(170052.000000,195816.000000,33100.000000,3.057520)}
{pt3dadd(170376.000000,195624.000000,33025.000000,3.057520)}
{pt3dadd(171312.000000,195396.000000,32350.000000,4.986545)}
{pt3dadd(171576.000000,195060.000000,32150.000000,3.429025)}
{pt3dadd(171852.000000,194712.000000,31825.000000,3.429025)}
{pt3dadd(172008.000000,194448.000000,31625.000000,3.429025)}
{pt3dadd(172200.000000,194184.000000,31450.000000,4.676958)}
{pt3dadd(172368.000000,193944.000000,31350.000000,2.747934)}
{pt3dadd(172368.000000,193692.000000,31325.000000,2.747934)}
{pt3dadd(173052.000000,193296.000000,31000.000000,2.747934)}
{pt3dadd(173616.000000,192684.000000,30625.000000,3.995868)}
{pt3dadd(173940.000000,192444.000000,30500.000000,2.747934)}
{pt3dadd(174096.000000,192204.000000,30325.000000,2.747934)}
{pt3dadd(174588.000000,191868.000000,29900.000000,2.747934)}
{pt3dadd(175008.000000,191568.000000,29750.000000,4.676958)}
{pt3dadd(175104.000000,191184.000000,29625.000000,4.986545)}
{pt3dadd(174996.000000,190944.000000,29625.000000,6.915570)}
{pt3dadd(175044.000000,190680.000000,29700.000000,10.525949)}
{pt3dadd(175068.000000,190512.000000,29575.000000,11.145123)}

{create adhoc52}
{access adhoc52}
{connect adhoc52(1), adhoc50(0)}
{nseg = 1}
{strdef color color = "White"}
{pt3dclear()}
{pt3dadd(163188.000000,210288.000000,39325.000000,16.048977)}
{pt3dadd(164100.000000,210240.000000,38225.000000,9.564700)}
{pt3dadd(164292.000000,209976.000000,38025.000000,6.338820)}
{pt3dadd(164496.000000,209796.000000,37975.000000,5.358049)}
{pt3dadd(164628.000000,209568.000000,37850.000000,3.429025)}
{pt3dadd(164724.000000,209376.000000,37750.000000,3.429025)}
{pt3dadd(164916.000000,209196.000000,37650.000000,3.429025)}
{pt3dadd(164928.000000,209028.000000,37550.000000,4.986545)}
{pt3dadd(165024.000000,208836.000000,37475.000000,3.057520)}
{pt3dadd(165084.000000,208668.000000,37425.000000,3.057520)}
{pt3dadd(165144.000000,208440.000000,37425.000000,3.057520)}
{pt3dadd(165204.000000,208236.000000,37300.000000,4.986545)}
{pt3dadd(165180.000000,208056.000000,37250.000000,3.429025)}
{pt3dadd(165180.000000,207864.000000,37275.000000,3.429025)}
{pt3dadd(165276.000000,207672.000000,37050.000000,3.429025)}
{pt3dadd(165276.000000,207492.000000,36975.000000,5.803854)}
{pt3dadd(165240.000000,207300.000000,36875.000000,3.874829)}
{pt3dadd(165264.000000,207096.000000,36850.000000,3.874829)}
{pt3dadd(165204.000000,206904.000000,36725.000000,3.874829)}
{pt3dadd(165360.000000,206652.000000,36500.000000,7.426584)}
{pt3dadd(165360.000000,206376.000000,36375.000000,5.051754)}
{pt3dadd(165324.000000,206112.000000,36325.000000,5.051754)}
{pt3dadd(165420.000000,205848.000000,36375.000000,5.051754)}
{pt3dadd(165660.000000,205620.000000,36350.000000,7.426584)}
{pt3dadd(165624.000000,205380.000000,36300.000000,3.874829)}
{pt3dadd(165708.000000,205164.000000,36225.000000,8.196935)}
{pt3dadd(165768.000000,204996.000000,36150.000000,10.464771)}
{pt3dadd(165852.000000,204780.000000,35950.000000,12.483236)}
{pt3dadd(165900.000000,204528.000000,35900.000000,12.839182)}

{create adhoc53}
{access adhoc53}
{connect adhoc53(1), adhoc52(0)}
{nseg = 1}
{strdef color color = "White"}
{pt3dclear()}
{pt3dadd(165900.000000,204528.000000,35900.000000,12.839182)}
{pt3dadd(165864.000000,204300.000000,35825.000000,9.458778)}
{pt3dadd(165732.000000,204036.000000,35675.000000,6.449724)}

{create adhoc54}
{access adhoc54}
{connect adhoc54(1), adhoc52(0)}
{nseg = 1}
{strdef color color = "White"}
{pt3dclear()}
{pt3dadd(165900.000000,204528.000000,35900.000000,12.839182)}
{pt3dadd(166644.000000,204276.000000,35900.000000,7.359617)}
{pt3dadd(167076.000000,204060.000000,36000.000000,5.015770)}
{pt3dadd(167568.000000,203748.000000,35775.000000,4.587798)}
{pt3dadd(167904.000000,203652.000000,35550.000000,4.897384)}
{pt3dadd(167988.000000,203364.000000,35200.000000,6.145318)}
{pt3dadd(168000.000000,203196.000000,34875.000000,9.242197)}
{pt3dadd(168000.000000,203196.000000,34600.000000,7.739669)}

{create adhoc55}
{access adhoc55}
{connect adhoc55(1), adhoc49(0)}
{nseg = 1}
{strdef color color = "White"}
{pt3dclear()}
{pt3dadd(151740.000000,229500.000000,67575.000000,47.921990)}
{pt3dadd(151692.000000,230928.000000,67025.000000,22.893587)}
{pt3dadd(151884.000000,231276.000000,66300.000000,14.336152)}
{pt3dadd(151884.000000,233040.000000,63850.000000,7.426584)}
{pt3dadd(151956.000000,232872.000000,63500.000000,3.874829)}
{pt3dadd(152016.000000,232968.000000,63275.000000,3.874829)}
{pt3dadd(151956.000000,233052.000000,62925.000000,3.874829)}
{pt3dadd(152220.000000,233436.000000,62400.000000,7.426584)}
{pt3dadd(152220.000000,233628.000000,61875.000000,5.051754)}
{pt3dadd(152460.000000,233652.000000,61350.000000,9.373860)}
{pt3dadd(152520.000000,233736.000000,60875.000000,13.695965)}
{pt3dadd(152652.000000,233676.000000,60425.000000,15.907018)}
{pt3dadd(152772.000000,233676.000000,59975.000000,23.110527)}

{create adhoc56}
{access adhoc56}
{connect adhoc56(1), adhoc48(0)}
{nseg = 1}
{strdef color color = "White"}
{pt3dclear()}
{pt3dadd(154176.000000,228048.000000,70175.000000,39.934990)}
{pt3dadd(154212.000000,228468.000000,71475.000000,18.269712)}
{pt3dadd(154032.000000,228768.000000,71900.000000,11.561827)}
{pt3dadd(153720.000000,228672.000000,72400.000000,5.803854)}
{pt3dadd(153648.000000,228720.000000,72825.000000,3.429025)}
{pt3dadd(153552.000000,228780.000000,73225.000000,3.429025)}
{pt3dadd(153348.000000,228708.000000,73625.000000,4.676958)}
{pt3dadd(152976.000000,228768.000000,74000.000000,5.924892)}
{pt3dadd(152712.000000,229212.000000,74050.000000,5.659779)}
{pt3dadd(152472.000000,229380.000000,74325.000000,7.739669)}

{create adhoc57}
{access adhoc57}
{connect adhoc57(1), adhoc37(0)}
{nseg = 1}
{strdef color color = "White"}
{pt3dclear()}
{pt3dadd(167400.000000,225984.000000,74475.000000,57.506386)}
{pt3dadd(167208.000000,225552.000000,72475.000000,27.372304)}
{pt3dadd(167208.000000,225240.000000,71975.000000,17.023383)}
{pt3dadd(167460.000000,224496.000000,71625.000000,9.373860)}
{pt3dadd(167700.000000,223920.000000,71250.000000,5.051754)}
{pt3dadd(167904.000000,223488.000000,70975.000000,5.051754)}
{pt3dadd(167868.000000,223248.000000,70475.000000,5.051754)}
{pt3dadd(167808.000000,223308.000000,70100.000000,6.980779)}
{pt3dadd(168108.000000,223380.000000,69750.000000,3.429025)}
{pt3dadd(168312.000000,223248.000000,69500.000000,4.676958)}
{pt3dadd(168708.000000,223296.000000,69275.000000,7.586754)}
{pt3dadd(168936.000000,223344.000000,69075.000000,8.429549)}
{pt3dadd(168900.000000,223248.000000,68950.000000,16.048977)}

{create adhoc58}
{access adhoc58}
{connect adhoc58(1), adhoc36(0)}
{nseg = 1}
{strdef color color = "White"}
{pt3dclear()}
{pt3dadd(171036.000000,226344.000000,77525.000000,47.921990)}
{pt3dadd(170772.000000,228288.000000,79075.000000,20.932046)}
{pt3dadd(170592.000000,228480.000000,79250.000000,19.671278)}
{pt3dadd(170400.000000,228576.000000,79375.000000,12.353418)}
{pt3dadd(170208.000000,228780.000000,79550.000000,13.374147)}

{create adhoc59}
{access adhoc59}
{connect adhoc59(1), adhoc58(0)}
{nseg = 1}
{strdef color color = "White"}
{pt3dclear()}
{pt3dadd(170208.000000,228780.000000,79550.000000,13.374147)}
{pt3dadd(170196.000000,229716.000000,80400.000000,10.752980)}
{pt3dadd(170364.000000,230028.000000,80700.000000,7.739669)}

{create adhoc60}
{access adhoc60}
{connect adhoc60(1), adhoc58(0)}
{nseg = 1}
{strdef color color = "White"}
{pt3dclear()}
{pt3dadd(170208.000000,228780.000000,79550.000000,13.374147)}
{pt3dadd(169896.000000,229380.000000,79650.000000,8.524488)}
{pt3dadd(169692.000000,229644.000000,79400.000000,5.714693)}
{pt3dadd(169464.000000,229908.000000,79350.000000,5.179727)}
{pt3dadd(169296.000000,230172.000000,79000.000000,3.339863)}
{pt3dadd(169296.000000,230532.000000,78800.000000,5.268888)}
{pt3dadd(169392.000000,230712.000000,78825.000000,7.197913)}
{pt3dadd(169560.000000,230916.000000,78900.000000,7.930082)}
{pt3dadd(169584.000000,231084.000000,78900.000000,11.145123)}

{create adhoc61}
{access adhoc61}
{connect adhoc61(1), adhoc19(0)}
{nseg = 1}
{strdef color color = "White"}
{pt3dclear()}
{pt3dadd(192312.000000,198792.000000,93500.000000,82.809190)}
{pt3dadd(192264.000000,198708.000000,93850.000000,61.226738)}
{pt3dadd(192180.000000,198888.000000,94400.000000,37.336043)}
{pt3dadd(192420.000000,198732.000000,95225.000000,44.623251)}
{pt3dadd(192528.000000,198492.000000,96325.000000,25.049046)}
{pt3dadd(192588.000000,198480.000000,96975.000000,25.049046)}
{pt3dadd(192840.000000,198240.000000,97575.000000,25.049046)}
{pt3dadd(192816.000000,198048.000000,98200.000000,53.367902)}
{pt3dadd(192792.000000,197928.000000,98850.000000,29.818856)}
{pt3dadd(193152.000000,197844.000000,99650.000000,29.818856)}
{pt3dadd(193284.000000,197904.000000,100450.000000,29.818856)}
{pt3dadd(193284.000000,197820.000000,101175.000000,51.498138)}
{pt3dadd(193272.000000,197892.000000,102000.000000,23.179282)}
{pt3dadd(192924.000000,197772.000000,102650.000000,23.179282)}
{pt3dadd(192732.000000,197640.000000,103450.000000,23.179282)}
{pt3dadd(192636.000000,197280.000000,104350.000000,51.498138)}
{pt3dadd(192708.000000,196968.000000,105025.000000,29.818856)}
{pt3dadd(192636.000000,196680.000000,105500.000000,29.818856)}
{pt3dadd(192444.000000,196188.000000,106125.000000,29.818856)}
{pt3dadd(192312.000000,195876.000000,106850.000000,58.137712)}
{pt3dadd(192276.000000,195744.000000,107350.000000,29.818856)}
{pt3dadd(192120.000000,195468.000000,108025.000000,29.718856)}
{pt3dadd(192216.000000,195384.000000,108450.000000,29.718856)}
{pt3dadd(192012.000000,195660.000000,108825.000000,48.498094)}
{pt3dadd(191952.000000,195084.000000,109150.000000,20.179238)}
{pt3dadd(192012.000000,194808.000000,109525.000000,20.179238)}
{pt3dadd(191868.000000,194664.000000,109950.000000,20.279238)}
{pt3dadd(191772.000000,194424.000000,110400.000000,33.780770)}
{pt3dadd(191424.000000,193944.000000,110900.000000,15.001532)}
{pt3dadd(191256.000000,193692.000000,111250.000000,15.001532)}
{pt3dadd(190860.000000,193548.000000,111650.000000,15.001532)}
{pt3dadd(190620.000000,192996.000000,112175.000000,26.202809)}
{pt3dadd(190116.000000,192348.000000,112825.000000,12.701277)}
{pt3dadd(189804.000000,192000.000000,113200.000000,12.701277)}
{pt3dadd(189456.000000,191640.000000,113625.000000,12.701277)}
{pt3dadd(189192.000000,191028.000000,114100.000000,21.985675)}
{pt3dadd(188796.000000,190656.000000,114625.000000,10.784398)}
{pt3dadd(188544.000000,190164.000000,115150.000000,10.784398)}
{pt3dadd(188400.000000,189480.000000,115650.000000,10.784398)}
{pt3dadd(188124.000000,188964.000000,116100.000000,21.985675)}
{pt3dadd(187728.000000,188376.000000,116675.000000,12.701277)}
{pt3dadd(187332.000000,188004.000000,117150.000000,12.701277)}
{pt3dadd(186936.000000,187572.000000,117750.000000,12.701277)}
{pt3dadd(186540.000000,187128.000000,118225.000000,21.985675)}
{pt3dadd(186132.000000,186912.000000,118800.000000,10.784398)}
{pt3dadd(185760.000000,186768.000000,119350.000000,10.784398)}
{pt3dadd(185652.000000,186432.000000,119750.000000,10.784398)}
{pt3dadd(185412.000000,185952.000000,120100.000000,19.685420)}
{pt3dadd(184812.000000,185712.000000,120500.000000,10.401022)}
{pt3dadd(184596.000000,185532.000000,121000.000000,10.401022)}
{pt3dadd(184236.000000,185148.000000,121525.000000,10.401022)}
{pt3dadd(183540.000000,184896.000000,121975.000000,18.088020)}
{pt3dadd(182856.000000,184440.000000,122450.000000,9.186998)}
{pt3dadd(182232.000000,184008.000000,122975.000000,9.186998)}
{pt3dadd(181644.000000,183828.000000,123425.000000,9.186998)}
{pt3dadd(180984.000000,183516.000000,123975.000000,18.471396)}
{pt3dadd(180324.000000,183252.000000,124425.000000,10.784398)}
{pt3dadd(179820.000000,182940.000000,124825.000000,10.784398)}
{pt3dadd(179316.000000,182628.000000,125200.000000,10.784398)}
{pt3dadd(178956.000000,182088.000000,125750.000000,20.068796)}
{pt3dadd(178308.000000,181572.000000,126250.000000,10.784398)}
{pt3dadd(177660.000000,181056.000000,126625.000000,10.784398)}
{pt3dadd(177468.000000,180768.000000,127050.000000,10.784398)}
{pt3dadd(175728.000000,179124.000000,127425.000000,13.694193)}
{pt3dadd(175488.000000,178956.000000,127425.000000,4.409795)}
{pt3dadd(175200.000000,178812.000000,127475.000000,4.409795)}
{pt3dadd(174840.000000,178380.000000,127525.000000,4.409795)}
{pt3dadd(174468.000000,178164.000000,127675.000000,12.096793)}
{pt3dadd(174156.000000,177996.000000,127825.000000,9.186998)}
{pt3dadd(173892.000000,177672.000000,127875.000000,9.186998)}
{pt3dadd(173652.000000,177420.000000,127925.000000,9.186998)}
{pt3dadd(173352.000000,177180.000000,128025.000000,19.928224)}
{pt3dadd(173076.000000,177204.000000,128225.000000,12.241226)}
{pt3dadd(172788.000000,176964.000000,128175.000000,12.241226)}
{pt3dadd(172512.000000,176832.000000,128375.000000,12.241226)}
{pt3dadd(172188.000000,176556.000000,128650.000000,21.525624)}
{pt3dadd(171864.000000,176016.000000,128725.000000,10.784398)}
{pt3dadd(171576.000000,175812.000000,128900.000000,10.784398)}
{pt3dadd(171360.000000,175632.000000,129025.000000,10.784398)}
{pt3dadd(171036.000000,175392.000000,129100.000000,17.140230)}
{pt3dadd(170772.000000,175152.000000,129200.000000,7.855832)}
{pt3dadd(170472.000000,174912.000000,129325.000000,7.855832)}
{pt3dadd(170184.000000,174516.000000,129525.000000,7.855832)}
{pt3dadd(169932.000000,174444.000000,129725.000000,15.542830)}
{pt3dadd(169632.000000,174000.000000,130025.000000,9.186998)}
{pt3dadd(169344.000000,173712.000000,130250.000000,9.186998)}
{pt3dadd(169092.000000,173388.000000,130575.000000,9.186998)}
{pt3dadd(168828.000000,172980.000000,130875.000000,20.388275)}
{pt3dadd(168564.000000,172728.000000,131100.000000,12.701277)}
{pt3dadd(168312.000000,172380.000000,131225.000000,12.701277)}
{pt3dadd(168048.000000,172020.000000,131375.000000,12.701277)}
{pt3dadd(167784.000000,171708.000000,131600.000000,21.985675)}
{pt3dadd(167544.000000,171168.000000,131850.000000,10.784398)}
{pt3dadd(167268.000000,170964.000000,131975.000000,10.784398)}
{pt3dadd(166896.000000,170640.000000,132325.000000,10.784398)}
{pt3dadd(166536.000000,169944.000000,132425.000000,20.068796)}
{pt3dadd(166092.000000,169548.000000,132600.000000,10.784398)}
{pt3dadd(165732.000000,169032.000000,132725.000000,10.784398)}
{pt3dadd(165408.000000,168792.000000,133000.000000,10.784398)}
{pt3dadd(165096.000000,168432.000000,133125.000000,18.471396)}
{pt3dadd(164748.000000,168228.000000,133225.000000,9.186998)}
{pt3dadd(164400.000000,167784.000000,133425.000000,9.186998)}
{pt3dadd(163320.000000,167124.000000,133775.000000,9.186998)}
{pt3dadd(162372.000000,166488.000000,134275.000000,18.088020)}
{pt3dadd(161352.000000,165924.000000,134950.000000,10.401022)}
{pt3dadd(161100.000000,165648.000000,135300.000000,10.401022)}
{pt3dadd(160776.000000,165372.000000,135475.000000,10.401022)}
{pt3dadd(160404.000000,165384.000000,135675.000000,16.756854)}
{pt3dadd(160116.000000,165396.000000,135875.000000,7.855832)}
{pt3dadd(159828.000000,165408.000000,136075.000000,7.855832)}
{pt3dadd(159588.000000,165420.000000,136200.000000,7.855832)}
{pt3dadd(159216.000000,165444.000000,136275.000000,14.211664)}
{pt3dadd(158976.000000,165096.000000,136800.000000,7.855832)}
{pt3dadd(158088.000000,164748.000000,137450.000000,7.855832)}
{pt3dadd(158172.000000,164604.000000,138225.000000,7.855832)}
{pt3dadd(158352.000000,163824.000000,138675.000000,13.945430)}
{pt3dadd(157908.000000,163176.000000,139175.000000,7.589598)}
{pt3dadd(157476.000000,162672.000000,139700.000000,7.589598)}
{pt3dadd(156564.000000,162240.000000,140350.000000,7.589598)}
{pt3dadd(155916.000000,162072.000000,140925.000000,18.790876)}
{pt3dadd(155340.000000,161388.000000,141575.000000,12.701277)}
{pt3dadd(155016.000000,160608.000000,142175.000000,12.701277)}
{pt3dadd(154836.000000,160176.000000,142725.000000,12.701277)}
{pt3dadd(154560.000000,159900.000000,143375.000000,20.388275)}
{pt3dadd(154080.000000,159324.000000,144000.000000,9.186998)}
{pt3dadd(153648.000000,158328.000000,144625.000000,9.186998)}
{pt3dadd(153288.000000,157932.000000,145250.000000,9.186998)}
{pt3dadd(152856.000000,157584.000000,145925.000000,18.471396)}
{pt3dadd(152508.000000,156852.000000,146450.000000,10.784398)}
{pt3dadd(152256.000000,156576.000000,146900.000000,10.784398)}
{pt3dadd(152160.000000,156660.000000,147350.000000,10.784398)}
{pt3dadd(151920.000000,156744.000000,147975.000000,30.358603)}
{pt3dadd(151680.000000,156144.000000,148550.000000,21.074205)}
{pt3dadd(151584.000000,156108.000000,149050.000000,21.074205)}
{pt3dadd(151596.000000,156012.000000,149575.000000,21.074205)}
{pt3dadd(151788.000000,155772.000000,150025.000000,40.648410)}
{pt3dadd(151428.000000,155892.000000,150675.000000,21.074205)}
{pt3dadd(151260.000000,155652.000000,151350.000000,21.074205)}
{pt3dadd(151164.000000,154872.000000,151975.000000,21.074205)}
{pt3dadd(151212.000000,154368.000000,152625.000000,44.623251)}
{pt3dadd(151224.000000,154008.000000,153375.000000,25.049046)}
{pt3dadd(151092.000000,153384.000000,154025.000000,25.049046)}
{pt3dadd(151044.000000,152940.000000,154675.000000,25.049046)}
{pt3dadd(150960.000000,152868.000000,155325.000000,53.367902)}
{pt3dadd(150744.000000,152796.000000,156125.000000,29.818856)}
{pt3dadd(150600.000000,152352.000000,156725.000000,29.818856)}
{pt3dadd(150624.000000,151920.000000,157400.000000,29.818856)}
{pt3dadd(150684.000000,151560.000000,157975.000000,49.393061)}
{pt3dadd(150624.000000,151164.000000,158750.000000,21.074205)}
{pt3dadd(150564.000000,150612.000000,159425.000000,21.074205)}
{pt3dadd(150780.000000,150144.000000,160075.000000,21.074205)}
{pt3dadd(151200.000000,149556.000000,160650.000000,37.336043)}
{pt3dadd(151992.000000,148812.000000,161300.000000,17.761838)}
{pt3dadd(152856.000000,148248.000000,161800.000000,17.761838)}
{pt3dadd(153672.000000,147552.000000,162500.000000,17.761838)}
{pt3dadd(155112.000000,145908.000000,163025.000000,24.117670)}
{pt3dadd(155808.000000,145464.000000,163225.000000,7.855832)}
{pt3dadd(156576.000000,145128.000000,163350.000000,7.855832)}
{pt3dadd(157152.000000,144804.000000,163375.000000,7.855832)}
{pt3dadd(157344.000000,144396.000000,163500.000000,19.057109)}
{pt3dadd(157536.000000,144072.000000,163775.000000,12.701277)}
{pt3dadd(158064.000000,143712.000000,164000.000000,12.701277)}
{pt3dadd(158604.000000,143400.000000,164125.000000,12.701277)}
{pt3dadd(158772.000000,143076.000000,164400.000000,26.202809)}
{pt3dadd(159156.000000,142692.000000,164475.000000,15.001532)}
{pt3dadd(159420.000000,142392.000000,164625.000000,15.001532)}
{pt3dadd(159780.000000,142080.000000,164950.000000,15.001532)}
{pt3dadd(159972.000000,141732.000000,165075.000000,31.263370)}
{pt3dadd(160128.000000,141336.000000,165200.000000,17.761838)}
{pt3dadd(160356.000000,140880.000000,165550.000000,17.761838)}
{pt3dadd(160968.000000,140436.000000,166100.000000,17.761838)}
{pt3dadd(161052.000000,139980.000000,166325.000000,34.023676)}
{pt3dadd(161172.000000,139668.000000,166725.000000,17.761838)}
{pt3dadd(161604.000000,139308.000000,166975.000000,17.761838)}
{pt3dadd(161904.000000,138864.000000,167250.000000,17.761838)}
{pt3dadd(162240.000000,138420.000000,167650.000000,37.336043)}
{pt3dadd(162300.000000,138072.000000,168200.000000,21.074205)}
{pt3dadd(162348.000000,137640.000000,168725.000000,21.074205)}
{pt3dadd(162708.000000,137340.000000,169275.000000,21.074205)}
{pt3dadd(162804.000000,137028.000000,169375.000000,48.248307)}
{pt3dadd(162744.000000,136656.000000,169575.000000,28.674102)}
{pt3dadd(162708.000000,135768.000000,170325.000000,28.674102)}
{pt3dadd(162672.000000,135420.000000,171000.000000,28.674102)}
{pt3dadd(162636.000000,135072.000000,171625.000000,62.716728)}
{pt3dadd(162600.000000,134724.000000,172225.000000,35.542626)}
{pt3dadd(162564.000000,134484.000000,172700.000000,35.542626)}
{pt3dadd(162912.000000,134388.000000,173325.000000,35.542626)}
{pt3dadd(162840.000000,134388.000000,174000.000000,69.585252)}
{pt3dadd(161724.000000,134148.000000,174575.000000,35.542626)}
{pt3dadd(161616.000000,134004.000000,175175.000000,35.542626)}
{pt3dadd(161640.000000,134004.000000,175775.000000,35.542626)}
{pt3dadd(161616.000000,133908.000000,176375.000000,59.091672)}
{pt3dadd(161544.000000,133872.000000,177175.000000,25.049046)}
{pt3dadd(161256.000000,134004.000000,178050.000000,25.049046)}
{pt3dadd(161112.000000,134028.000000,178800.000000,25.049046)}
{pt3dadd(161052.000000,134028.000000,179250.000000,48.598092)}
{pt3dadd(160908.000000,133824.000000,179850.000000,25.049046)}
{pt3dadd(160848.000000,133428.000000,180525.000000,25.049046)}
{pt3dadd(160620.000000,133104.000000,181425.000000,48.598092)}
{pt3dadd(160560.000000,132960.000000,182025.000000,248.298092)}
{pt3dadd(160560.000000,132708.000000,182500.000000,373.581743)}
{pt3dadd(160416.000000,132540.000000,182800.000000,1000.000000)}
