# Supplementary material for: Full reconstruction of large lobula plate tangential cells in Drosophila from a 3D EM dataset
Source: PLoS One. 2018 Nov 28;13(11):e0207828. doi: 10.1371/journal.pone.0207828 (PMC6261601; doi:10.1371/journal.pone.0207828)
Supplement: S1 Dataset — (ZIP) [file pone.0207828.s001.zip › Diameter hoc/VS_VSL_preliminary/VSlike1_3skels_ck.001_completed.hoc0002.hoc]

/* created with convertKnossosNmlToHoc.m */

{create adhoc1}
{access adhoc1}
{nseg = 1}
{strdef color color = "White"}
{pt3dclear()}
{pt3dadd(192924.000000,137100.000000,42600.000000,8.916098)}
{pt3dadd(192984.000000,137352.000000,42650.000000,9.891623)}
{pt3dadd(192972.000000,137544.000000,42825.000000,6.534974)}
{pt3dadd(193008.000000,137652.000000,43050.000000,7.426584)}
{pt3dadd(193044.000000,137760.000000,43250.000000,3.874829)}
{pt3dadd(193068.000000,137928.000000,43400.000000,3.874829)}
{pt3dadd(193068.000000,138084.000000,43625.000000,3.874829)}
{pt3dadd(193116.000000,138216.000000,43875.000000,5.122763)}
{pt3dadd(192900.000000,138360.000000,44100.000000,2.747934)}
{pt3dadd(192564.000000,138492.000000,44275.000000,2.747934)}
{pt3dadd(192432.000000,138672.000000,44350.000000,2.747934)}
{pt3dadd(192336.000000,138876.000000,44500.000000,5.529337)}
{pt3dadd(192180.000000,139032.000000,44575.000000,4.281404)}
{pt3dadd(192024.000000,139236.000000,44650.000000,4.281404)}
{pt3dadd(191856.000000,139440.000000,44750.000000,4.281404)}
{pt3dadd(191820.000000,139584.000000,44750.000000,5.838924)}
{pt3dadd(191760.000000,139740.000000,44825.000000,3.057520)}
{pt3dadd(191796.000000,139896.000000,44850.000000,3.057520)}
{pt3dadd(191832.000000,140052.000000,44850.000000,3.057520)}
{pt3dadd(191844.000000,140232.000000,44800.000000,4.986545)}
{pt3dadd(191832.000000,140388.000000,44900.000000,3.429025)}
{pt3dadd(191784.000000,140568.000000,44900.000000,3.429025)}
{pt3dadd(191808.000000,140736.000000,44900.000000,3.429025)}
{pt3dadd(191844.000000,140856.000000,44925.000000,5.358049)}
{pt3dadd(191880.000000,140988.000000,44950.000000,3.429025)}
{pt3dadd(191940.000000,141144.000000,45025.000000,3.429025)}
{pt3dadd(191880.000000,141300.000000,45050.000000,3.429025)}
{pt3dadd(192012.000000,141480.000000,45100.000000,5.358049)}
{pt3dadd(191988.000000,141636.000000,45125.000000,3.429025)}
{pt3dadd(191964.000000,141780.000000,45150.000000,3.429025)}
{pt3dadd(192060.000000,141960.000000,45150.000000,3.429025)}
{pt3dadd(192156.000000,142164.000000,45150.000000,5.803854)}
{pt3dadd(192132.000000,142344.000000,45125.000000,3.874829)}
{pt3dadd(192108.000000,142500.000000,45100.000000,3.874829)}
{pt3dadd(192084.000000,142680.000000,45075.000000,3.874829)}
{pt3dadd(192060.000000,142860.000000,45000.000000,6.249659)}
{pt3dadd(192096.000000,143052.000000,45075.000000,3.874829)}
{pt3dadd(191976.000000,143256.000000,45125.000000,3.874829)}
{pt3dadd(192120.000000,143484.000000,45150.000000,3.874829)}
{pt3dadd(192180.000000,143676.000000,45100.000000,4.649783)}
{pt3dadd(192384.000000,143820.000000,45050.000000,2.274954)}
{pt3dadd(192564.000000,144036.000000,44750.000000,2.274954)}
{pt3dadd(192648.000000,144240.000000,44750.000000,2.274954)}
{pt3dadd(192684.000000,144420.000000,44775.000000,3.522888)}
{pt3dadd(192720.000000,144600.000000,44775.000000,2.747934)}
{pt3dadd(192792.000000,144780.000000,44650.000000,2.747934)}
{pt3dadd(192756.000000,144972.000000,44650.000000,2.747934)}
{pt3dadd(192720.000000,145176.000000,44650.000000,4.676958)}
{pt3dadd(192684.000000,145368.000000,44650.000000,3.429025)}
{pt3dadd(192600.000000,145584.000000,44600.000000,3.429025)}
{pt3dadd(192600.000000,145788.000000,44600.000000,3.429025)}
{pt3dadd(192600.000000,145956.000000,44600.000000,5.358049)}
{pt3dadd(192600.000000,146124.000000,44600.000000,3.429025)}
{pt3dadd(192600.000000,146328.000000,44600.000000,3.429025)}
{pt3dadd(192612.000000,146496.000000,44525.000000,3.429025)}
{pt3dadd(192624.000000,146676.000000,44450.000000,6.338820)}
{pt3dadd(192636.000000,146844.000000,44375.000000,4.409795)}
{pt3dadd(192648.000000,147012.000000,44300.000000,6.338820)}
{pt3dadd(192660.000000,147228.000000,44225.000000,9.248615)}
{pt3dadd(192684.000000,147492.000000,44075.000000,9.564700)}
{pt3dadd(192504.000000,147756.000000,43625.000000,16.048977)}

{create adhoc2}
{access adhoc2}
{connect adhoc2(1), adhoc1(0)}
{nseg = 1}
{strdef color color = "White"}
{pt3dclear()}
{pt3dadd(192504.000000,147756.000000,43625.000000,16.048977)}
{pt3dadd(192192.000000,147660.000000,42925.000000,9.564700)}
{pt3dadd(191976.000000,147384.000000,42675.000000,6.338820)}
{pt3dadd(191688.000000,147252.000000,42375.000000,4.203979)}
{pt3dadd(191448.000000,147144.000000,42175.000000,2.274954)}
{pt3dadd(191280.000000,147012.000000,42125.000000,2.274954)}
{pt3dadd(191112.000000,146964.000000,42050.000000,2.274954)}
{pt3dadd(190968.000000,146736.000000,42050.000000,3.049908)}
{pt3dadd(190812.000000,146592.000000,42025.000000,2.274954)}
{pt3dadd(190668.000000,146400.000000,41975.000000,2.274954)}
{pt3dadd(190716.000000,146160.000000,42075.000000,2.274954)}
{pt3dadd(190716.000000,145968.000000,42050.000000,3.264899)}
{pt3dadd(190452.000000,145776.000000,42150.000000,2.489945)}
{pt3dadd(190032.000000,145584.000000,42075.000000,2.489945)}
{pt3dadd(189804.000000,145452.000000,42100.000000,2.489945)}
{pt3dadd(189576.000000,145344.000000,42100.000000,3.737879)}
{pt3dadd(189444.000000,145224.000000,42075.000000,2.747934)}
{pt3dadd(189252.000000,145116.000000,42050.000000,2.747934)}
{pt3dadd(189012.000000,144960.000000,42025.000000,2.747934)}
{pt3dadd(188808.000000,144780.000000,42050.000000,3.933950)}
{pt3dadd(188772.000000,144660.000000,42150.000000,3.675961)}
{pt3dadd(188688.000000,144528.000000,42175.000000,5.126602)}
{pt3dadd(188520.000000,144348.000000,42200.000000,6.449724)}

{create adhoc3}
{access adhoc3}
{connect adhoc3(1), adhoc1(0)}
{nseg = 1}
{strdef color color = "White"}
{pt3dclear()}
{pt3dadd(192504.000000,147756.000000,43625.000000,16.048977)}
{pt3dadd(192456.000000,147924.000000,43625.000000,12.269250)}
{pt3dadd(192432.000000,148128.000000,43625.000000,7.961550)}
{pt3dadd(192468.000000,148344.000000,43675.000000,7.961550)}
{pt3dadd(192540.000000,148512.000000,43750.000000,4.409795)}
{pt3dadd(192612.000000,148716.000000,43825.000000,4.409795)}
{pt3dadd(192564.000000,148908.000000,43850.000000,4.409795)}
{pt3dadd(192552.000000,149100.000000,43875.000000,6.784625)}
{pt3dadd(192492.000000,149328.000000,43875.000000,3.874829)}
{pt3dadd(192420.000000,149520.000000,43900.000000,3.874829)}
{pt3dadd(192396.000000,149736.000000,43900.000000,3.874829)}
{pt3dadd(192324.000000,149928.000000,43725.000000,6.249659)}
{pt3dadd(192432.000000,150120.000000,43625.000000,3.874829)}
{pt3dadd(192540.000000,150336.000000,43525.000000,3.874829)}
{pt3dadd(192384.000000,150552.000000,43425.000000,3.874829)}
{pt3dadd(192540.000000,150768.000000,43275.000000,5.803854)}
{pt3dadd(192564.000000,150984.000000,43250.000000,3.429025)}
{pt3dadd(192504.000000,151176.000000,43275.000000,3.429025)}
{pt3dadd(192444.000000,151392.000000,43300.000000,3.429025)}
{pt3dadd(192384.000000,151596.000000,43325.000000,6.338820)}
{pt3dadd(192396.000000,151812.000000,43250.000000,4.409795)}
{pt3dadd(192336.000000,152004.000000,43150.000000,4.409795)}
{pt3dadd(192288.000000,152208.000000,43125.000000,4.409795)}
{pt3dadd(192204.000000,152412.000000,43050.000000,8.731901)}
{pt3dadd(192288.000000,152652.000000,43075.000000,5.822105)}
{pt3dadd(192276.000000,152844.000000,42950.000000,5.822105)}
{pt3dadd(192312.000000,153024.000000,42825.000000,5.822105)}
{pt3dadd(192240.000000,153204.000000,42850.000000,10.144211)}
{pt3dadd(192252.000000,153396.000000,42750.000000,5.822105)}
{pt3dadd(192264.000000,153600.000000,42650.000000,5.822105)}
{pt3dadd(192288.000000,153780.000000,42675.000000,5.822105)}
{pt3dadd(192324.000000,153948.000000,42600.000000,9.373860)}
{pt3dadd(192360.000000,154104.000000,42625.000000,5.051754)}
{pt3dadd(192396.000000,154308.000000,42650.000000,5.051754)}
{pt3dadd(192408.000000,154500.000000,42600.000000,5.051754)}
{pt3dadd(192336.000000,154668.000000,42500.000000,7.961550)}
{pt3dadd(192360.000000,154848.000000,42500.000000,4.409795)}
{pt3dadd(192384.000000,155064.000000,42500.000000,4.409795)}
{pt3dadd(192480.000000,155208.000000,42500.000000,4.409795)}
{pt3dadd(192444.000000,155388.000000,42475.000000,5.967316)}
{pt3dadd(192408.000000,155592.000000,42450.000000,3.057520)}
{pt3dadd(192360.000000,155832.000000,42350.000000,3.057520)}
{pt3dadd(192216.000000,156024.000000,42275.000000,3.057520)}
{pt3dadd(192072.000000,156204.000000,42200.000000,5.967316)}
{pt3dadd(192072.000000,156396.000000,41950.000000,4.409795)}
{pt3dadd(192060.000000,156612.000000,41875.000000,4.409795)}
{pt3dadd(191892.000000,156840.000000,41825.000000,4.409795)}
{pt3dadd(191844.000000,157020.000000,41650.000000,7.961550)}
{pt3dadd(191748.000000,157248.000000,41575.000000,5.051754)}
{pt3dadd(191652.000000,157476.000000,41575.000000,5.051754)}
{pt3dadd(191568.000000,157680.000000,41575.000000,5.051754)}
{pt3dadd(191580.000000,157836.000000,41575.000000,8.603509)}
{pt3dadd(191592.000000,158040.000000,41575.000000,5.051754)}
{pt3dadd(191604.000000,158268.000000,41575.000000,5.051754)}
{pt3dadd(191556.000000,158460.000000,41600.000000,5.051754)}
{pt3dadd(191508.000000,158712.000000,41625.000000,9.373860)}
{pt3dadd(191532.000000,158892.000000,41700.000000,5.822105)}
{pt3dadd(191592.000000,159108.000000,41775.000000,5.822105)}
{pt3dadd(191592.000000,159264.000000,41700.000000,5.822105)}
{pt3dadd(191592.000000,159480.000000,41625.000000,10.144211)}
{pt3dadd(191508.000000,159696.000000,41750.000000,5.822105)}
{pt3dadd(191676.000000,159888.000000,41725.000000,5.822105)}
{pt3dadd(191844.000000,160092.000000,41700.000000,5.822105)}
{pt3dadd(191832.000000,160284.000000,41650.000000,10.144211)}
{pt3dadd(191832.000000,160488.000000,41650.000000,5.822105)}
{pt3dadd(191832.000000,160692.000000,41650.000000,5.822105)}
{pt3dadd(191844.000000,160860.000000,41575.000000,5.822105)}
{pt3dadd(191856.000000,161064.000000,41500.000000,10.144211)}
{pt3dadd(191712.000000,161232.000000,41575.000000,5.822105)}
{pt3dadd(191568.000000,161412.000000,41650.000000,5.822105)}
{pt3dadd(191412.000000,161604.000000,41650.000000,5.822105)}
{pt3dadd(191256.000000,161796.000000,41600.000000,9.373860)}
{pt3dadd(191100.000000,161940.000000,41550.000000,5.051754)}
{pt3dadd(190992.000000,162108.000000,41500.000000,5.051754)}
{pt3dadd(191016.000000,162276.000000,41500.000000,5.051754)}
{pt3dadd(190860.000000,162480.000000,41575.000000,8.603509)}
{pt3dadd(190536.000000,162660.000000,41575.000000,5.051754)}
{pt3dadd(190488.000000,162852.000000,41525.000000,5.051754)}
{pt3dadd(190488.000000,163044.000000,41650.000000,5.051754)}
{pt3dadd(190344.000000,163272.000000,41575.000000,8.603509)}
{pt3dadd(190224.000000,163452.000000,41575.000000,5.051754)}
{pt3dadd(190140.000000,163644.000000,41425.000000,5.051754)}
{pt3dadd(190056.000000,163836.000000,41425.000000,5.051754)}
{pt3dadd(190056.000000,164028.000000,41550.000000,7.833159)}
{pt3dadd(189972.000000,164220.000000,41425.000000,4.281404)}
{pt3dadd(189696.000000,164424.000000,41525.000000,4.281404)}
{pt3dadd(189552.000000,164640.000000,41525.000000,4.281404)}
{pt3dadd(189060.000000,164868.000000,41600.000000,8.603510)}
{pt3dadd(188628.000000,165132.000000,41550.000000,5.822105)}
{pt3dadd(187944.000000,165312.000000,41900.000000,5.822105)}
{pt3dadd(187716.000000,165468.000000,41850.000000,5.822105)}
{pt3dadd(187596.000000,165696.000000,41950.000000,8.731901)}
{pt3dadd(187560.000000,165936.000000,42025.000000,4.409795)}
{pt3dadd(187632.000000,166176.000000,42025.000000,4.409795)}
{pt3dadd(187704.000000,166380.000000,42025.000000,4.409795)}
{pt3dadd(187776.000000,166620.000000,42025.000000,7.319591)}
{pt3dadd(187728.000000,166848.000000,42050.000000,4.409795)}
{pt3dadd(187728.000000,167088.000000,42125.000000,4.409795)}
{pt3dadd(187884.000000,167328.000000,42125.000000,4.409795)}
{pt3dadd(187944.000000,167592.000000,42100.000000,6.338820)}
{pt3dadd(187968.000000,167844.000000,42000.000000,3.429025)}
{pt3dadd(187980.000000,168096.000000,42000.000000,3.429025)}
{pt3dadd(187992.000000,168276.000000,42000.000000,3.429025)}
{pt3dadd(188016.000000,168480.000000,42050.000000,6.980779)}
{pt3dadd(188112.000000,168684.000000,41950.000000,5.051754)}
{pt3dadd(188208.000000,168936.000000,41850.000000,5.051754)}
{pt3dadd(188280.000000,169128.000000,42025.000000,5.051754)}
{pt3dadd(188196.000000,169332.000000,42025.000000,10.298281)}
{pt3dadd(188112.000000,169536.000000,42025.000000,6.746526)}
{pt3dadd(188220.000000,169764.000000,42025.000000,6.746526)}
{pt3dadd(188292.000000,169968.000000,41925.000000,6.746526)}
{pt3dadd(188112.000000,170136.000000,41875.000000,10.883747)}
{pt3dadd(187932.000000,170304.000000,42175.000000,5.637221)}
{pt3dadd(187908.000000,170508.000000,42100.000000,5.637221)}
{pt3dadd(187764.000000,170736.000000,42100.000000,5.637221)}
{pt3dadd(187764.000000,170928.000000,42050.000000,9.959326)}
{pt3dadd(187776.000000,171168.000000,42100.000000,5.822105)}
{pt3dadd(187632.000000,171348.000000,42025.000000,5.822105)}
{pt3dadd(187488.000000,171552.000000,41925.000000,5.822105)}
{pt3dadd(187344.000000,171756.000000,41900.000000,11.068632)}
{pt3dadd(187320.000000,171960.000000,41900.000000,6.746526)}
{pt3dadd(187416.000000,172224.000000,41850.000000,6.746526)}
{pt3dadd(187416.000000,172524.000000,41750.000000,6.746526)}
{pt3dadd(187356.000000,172692.000000,41900.000000,11.993053)}
{pt3dadd(187368.000000,172896.000000,42050.000000,6.746526)}
{pt3dadd(187380.000000,173064.000000,42025.000000,6.746526)}
{pt3dadd(187380.000000,173244.000000,42075.000000,6.746526)}
{pt3dadd(187452.000000,173460.000000,42125.000000,11.993053)}
{pt3dadd(187392.000000,173628.000000,42100.000000,6.746526)}
{pt3dadd(187332.000000,173796.000000,42075.000000,6.746526)}
{pt3dadd(187272.000000,173940.000000,42050.000000,6.746526)}
{pt3dadd(187212.000000,174120.000000,42025.000000,11.993053)}
{pt3dadd(187152.000000,174276.000000,42000.000000,6.746526)}
{pt3dadd(187092.000000,174420.000000,41975.000000,6.746526)}
{pt3dadd(187032.000000,174624.000000,41950.000000,6.746526)}
{pt3dadd(186972.000000,174816.000000,41925.000000,10.298281)}
{pt3dadd(186864.000000,174996.000000,41975.000000,5.051754)}
{pt3dadd(186924.000000,175200.000000,41950.000000,5.051754)}
{pt3dadd(186756.000000,175404.000000,42100.000000,5.051754)}
{pt3dadd(186552.000000,175620.000000,42100.000000,8.603509)}
{pt3dadd(186444.000000,175824.000000,42150.000000,5.051754)}
{pt3dadd(186384.000000,176064.000000,42050.000000,5.051754)}
{pt3dadd(186384.000000,176244.000000,42025.000000,5.051754)}
{pt3dadd(186384.000000,176436.000000,42000.000000,10.298281)}
{pt3dadd(186384.000000,176664.000000,41975.000000,6.746526)}
{pt3dadd(186384.000000,176928.000000,42075.000000,6.746526)}
{pt3dadd(186192.000000,177408.000000,42375.000000,6.746526)}
{pt3dadd(185976.000000,177756.000000,42425.000000,11.993053)}
{pt3dadd(185736.000000,178116.000000,42475.000000,6.746526)}
{pt3dadd(185496.000000,178476.000000,42525.000000,6.746526)}
{pt3dadd(185244.000000,178644.000000,42450.000000,6.746526)}
{pt3dadd(184788.000000,178812.000000,42400.000000,11.068632)}
{pt3dadd(184644.000000,179028.000000,42375.000000,5.822105)}
{pt3dadd(184596.000000,179244.000000,42400.000000,5.822105)}
{pt3dadd(184548.000000,179448.000000,42425.000000,5.822105)}
{pt3dadd(184500.000000,179652.000000,42450.000000,10.144211)}
{pt3dadd(184452.000000,179808.000000,42475.000000,5.822105)}
{pt3dadd(184404.000000,179988.000000,42575.000000,5.822105)}
{pt3dadd(184356.000000,180156.000000,42500.000000,5.822105)}
{pt3dadd(184356.000000,180312.000000,42625.000000,10.144211)}
{pt3dadd(184356.000000,180516.000000,42875.000000,5.822105)}
{pt3dadd(184332.000000,180696.000000,42925.000000,5.822105)}
{pt3dadd(184308.000000,180864.000000,42975.000000,5.822105)}
{pt3dadd(184320.000000,181080.000000,43125.000000,11.068632)}
{pt3dadd(184236.000000,181284.000000,43375.000000,6.746526)}
{pt3dadd(184152.000000,181488.000000,43375.000000,6.746526)}
{pt3dadd(184188.000000,181668.000000,43500.000000,6.746526)}
{pt3dadd(184224.000000,181848.000000,43625.000000,11.068632)}
{pt3dadd(184260.000000,182028.000000,43750.000000,5.822105)}
{pt3dadd(184296.000000,182268.000000,43875.000000,5.822105)}
{pt3dadd(184212.000000,182496.000000,43950.000000,5.822105)}
{pt3dadd(184212.000000,182712.000000,44025.000000,10.144211)}
{pt3dadd(184188.000000,182892.000000,44075.000000,5.822105)}
{pt3dadd(184164.000000,183072.000000,44125.000000,5.822105)}
{pt3dadd(183996.000000,183264.000000,44275.000000,5.822105)}
{pt3dadd(183936.000000,183432.000000,44500.000000,13.509103)}
{pt3dadd(183876.000000,183672.000000,44725.000000,9.186998)}
{pt3dadd(183708.000000,183900.000000,44650.000000,9.186998)}
{pt3dadd(183576.000000,184080.000000,44875.000000,9.186998)}
{pt3dadd(183432.000000,184308.000000,45225.000000,16.873996)}
{pt3dadd(183492.000000,184500.000000,45375.000000,9.186998)}
{pt3dadd(183588.000000,184692.000000,45600.000000,9.186998)}
{pt3dadd(183684.000000,184932.000000,45825.000000,9.186998)}
{pt3dadd(183624.000000,185136.000000,45950.000000,15.542830)}
{pt3dadd(183564.000000,185352.000000,46050.000000,7.855832)}
{pt3dadd(183300.000000,185556.000000,46275.000000,7.855832)}
{pt3dadd(183036.000000,185808.000000,46250.000000,7.855832)}
{pt3dadd(183012.000000,186024.000000,46275.000000,12.177937)}
{pt3dadd(183024.000000,186336.000000,46450.000000,5.822105)}
{pt3dadd(183168.000000,186552.000000,46600.000000,5.822105)}
{pt3dadd(183144.000000,186768.000000,46625.000000,5.822105)}
{pt3dadd(183120.000000,186972.000000,46650.000000,11.068632)}
{pt3dadd(183096.000000,187212.000000,46675.000000,6.746526)}
{pt3dadd(183072.000000,187416.000000,46700.000000,6.746526)}
{pt3dadd(183048.000000,187656.000000,46725.000000,6.746526)}
{pt3dadd(183084.000000,187872.000000,46725.000000,13.102358)}
{pt3dadd(183228.000000,188160.000000,46850.000000,7.855832)}
{pt3dadd(183264.000000,188364.000000,46825.000000,7.855832)}
{pt3dadd(183132.000000,188556.000000,47100.000000,7.855832)}
{pt3dadd(183096.000000,188748.000000,47125.000000,15.542830)}
{pt3dadd(183012.000000,189012.000000,47375.000000,9.186998)}
{pt3dadd(182964.000000,189264.000000,47625.000000,9.186998)}
{pt3dadd(183024.000000,189504.000000,47825.000000,9.186998)}
{pt3dadd(183036.000000,189672.000000,47875.000000,15.542830)}
{pt3dadd(182748.000000,189912.000000,47950.000000,7.855832)}
{pt3dadd(182688.000000,190140.000000,48000.000000,7.855832)}
{pt3dadd(182628.000000,190356.000000,48125.000000,7.855832)}
{pt3dadd(182292.000000,190572.000000,48350.000000,14.211664)}
{pt3dadd(181956.000000,190800.000000,48575.000000,7.855832)}
{pt3dadd(181668.000000,190992.000000,48800.000000,7.855832)}
{pt3dadd(181680.000000,191196.000000,48850.000000,7.855832)}
{pt3dadd(181656.000000,191412.000000,49050.000000,13.102358)}
{pt3dadd(181512.000000,191604.000000,49375.000000,6.746526)}
{pt3dadd(181260.000000,191832.000000,49525.000000,6.746526)}
{pt3dadd(181212.000000,192072.000000,49850.000000,6.746526)}
{pt3dadd(181176.000000,192348.000000,50175.000000,13.102358)}
{pt3dadd(181008.000000,192564.000000,50675.000000,7.855832)}
{pt3dadd(181128.000000,192768.000000,50725.000000,7.855832)}
{pt3dadd(180996.000000,192984.000000,51100.000000,7.855832)}
{pt3dadd(180732.000000,193188.000000,51400.000000,15.542830)}
{pt3dadd(180468.000000,193404.000000,51450.000000,9.186998)}
{pt3dadd(180420.000000,193596.000000,51775.000000,9.186998)}
{pt3dadd(180312.000000,193764.000000,51650.000000,9.186998)}
{pt3dadd(180384.000000,193980.000000,52125.000000,15.542830)}
{pt3dadd(180528.000000,194388.000000,52500.000000,7.855832)}
{pt3dadd(180624.000000,194544.000000,52875.000000,7.855832)}
{pt3dadd(180888.000000,194796.000000,53375.000000,7.855832)}
{pt3dadd(180840.000000,195036.000000,53675.000000,15.542830)}
{pt3dadd(181128.000000,195252.000000,53625.000000,9.186998)}
{pt3dadd(181248.000000,195468.000000,53925.000000,9.186998)}
{pt3dadd(181284.000000,195672.000000,54125.000000,9.186998)}
{pt3dadd(181692.000000,195888.000000,54225.000000,12.096793)}
{pt3dadd(182028.000000,196104.000000,54375.000000,4.409795)}
{pt3dadd(181980.000000,196308.000000,54525.000000,4.409795)}
{pt3dadd(181932.000000,196488.000000,54675.000000,4.409795)}
{pt3dadd(181848.000000,196668.000000,54625.000000,7.319591)}
{pt3dadd(181584.000000,196848.000000,54650.000000,10.765627)}
{pt3dadd(181560.000000,197352.000000,55075.000000,16.942712)}
{pt3dadd(181104.000000,197664.000000,55450.000000,33.279160)}

{create adhoc4}
{access adhoc4}
{connect adhoc4(1), adhoc3(0)}
{nseg = 1}
{strdef color color = "White"}
{pt3dclear()}
{pt3dadd(181104.000000,197664.000000,55450.000000,33.279160)}
{pt3dadd(178068.000000,197976.000000,55100.000000,15.308094)}
{pt3dadd(177792.000000,197976.000000,55000.000000,9.784857)}
{pt3dadd(177588.000000,198144.000000,55075.000000,5.803854)}
{pt3dadd(177372.000000,198072.000000,55050.000000,3.874829)}
{pt3dadd(177168.000000,198096.000000,55000.000000,3.874829)}
{pt3dadd(176976.000000,198204.000000,55000.000000,3.874829)}
{pt3dadd(176784.000000,198156.000000,54800.000000,6.249659)}
{pt3dadd(176604.000000,198228.000000,54700.000000,3.874829)}
{pt3dadd(176424.000000,198300.000000,54600.000000,3.874829)}
{pt3dadd(176244.000000,198300.000000,54500.000000,6.784625)}
{pt3dadd(176064.000000,198480.000000,54425.000000,9.566028)}
{pt3dadd(175908.000000,198516.000000,54400.000000,7.637695)}
{pt3dadd(175752.000000,198528.000000,54425.000000,11.729492)}
{pt3dadd(175680.000000,198792.000000,54350.000000,3.732480)}

{create adhoc5}
{access adhoc5}
{connect adhoc5(1), adhoc4(0)}
{nseg = 1}
{strdef color color = "White"}
{pt3dclear()}
{pt3dadd(175680.000000,198792.000000,54350.000000,3.732480)}
{pt3dadd(175452.000000,199068.000000,54650.000000,4.324050)}
{pt3dadd(175272.000000,199344.000000,54775.000000,3.194430)}
{pt3dadd(175068.000000,199560.000000,54875.000000,3.737879)}
{pt3dadd(174888.000000,199668.000000,54850.000000,2.489945)}
{pt3dadd(174720.000000,199824.000000,55000.000000,2.489945)}
{pt3dadd(174588.000000,199908.000000,55000.000000,2.489945)}
{pt3dadd(174456.000000,199992.000000,55000.000000,4.047465)}
{pt3dadd(174312.000000,200076.000000,55000.000000,3.057520)}
{pt3dadd(174120.000000,200208.000000,55025.000000,3.057520)}
{pt3dadd(173856.000000,200340.000000,55050.000000,3.057520)}
{pt3dadd(173688.000000,200472.000000,55075.000000,4.986545)}
{pt3dadd(173532.000000,200496.000000,55200.000000,3.429025)}
{pt3dadd(173388.000000,200520.000000,55325.000000,3.429025)}
{pt3dadd(173232.000000,200568.000000,55350.000000,3.429025)}
{pt3dadd(173064.000000,200688.000000,55300.000000,4.418969)}
{pt3dadd(172872.000000,200712.000000,55350.000000,2.489945)}
{pt3dadd(172740.000000,200748.000000,55525.000000,2.489945)}
{pt3dadd(172584.000000,200736.000000,55625.000000,2.489945)}
{pt3dadd(172428.000000,200796.000000,55700.000000,3.479890)}
{pt3dadd(172284.000000,200856.000000,55800.000000,2.489945)}
{pt3dadd(172128.000000,200832.000000,55875.000000,2.489945)}
{pt3dadd(171984.000000,200808.000000,55950.000000,2.489945)}
{pt3dadd(171816.000000,200772.000000,56075.000000,3.737879)}
{pt3dadd(171588.000000,200844.000000,56250.000000,2.747934)}
{pt3dadd(171396.000000,200916.000000,56250.000000,2.747934)}
{pt3dadd(171216.000000,201132.000000,56400.000000,2.747934)}
{pt3dadd(171060.000000,201108.000000,56525.000000,4.676958)}
{pt3dadd(170928.000000,201192.000000,56525.000000,4.986545)}
{pt3dadd(170784.000000,201168.000000,56550.000000,7.310908)}
{pt3dadd(170664.000000,201288.000000,56525.000000,9.287602)}

{create adhoc6}
{access adhoc6}
{connect adhoc6(1), adhoc4(0)}
{nseg = 1}
{strdef color color = "White"}
{pt3dclear()}
{pt3dadd(175680.000000,198792.000000,54350.000000,3.732480)}
{pt3dadd(175572.000000,198408.000000,53975.000000,5.459201)}
{pt3dadd(175296.000000,198312.000000,53800.000000,3.875521)}
{pt3dadd(175128.000000,198336.000000,53600.000000,4.986545)}
{pt3dadd(174924.000000,198384.000000,53550.000000,3.057520)}
{pt3dadd(174720.000000,198492.000000,53450.000000,3.057520)}
{pt3dadd(174564.000000,198600.000000,53375.000000,3.057520)}
{pt3dadd(174372.000000,198624.000000,53325.000000,3.832474)}
{pt3dadd(174204.000000,198648.000000,53325.000000,2.274954)}
{pt3dadd(174024.000000,198744.000000,53375.000000,2.274954)}
{pt3dadd(173856.000000,198684.000000,53325.000000,2.274954)}
{pt3dadd(173676.000000,198684.000000,53350.000000,2.870749)}
{pt3dadd(173520.000000,198720.000000,53350.000000,2.095795)}
{pt3dadd(173352.000000,198756.000000,53350.000000,2.095795)}
{pt3dadd(173220.000000,198792.000000,53350.000000,2.095795)}
{pt3dadd(173076.000000,198816.000000,53450.000000,2.870749)}
{pt3dadd(172932.000000,198804.000000,53450.000000,2.274954)}
{pt3dadd(172800.000000,198792.000000,53450.000000,2.274954)}
{pt3dadd(172644.000000,198900.000000,53450.000000,2.274954)}
{pt3dadd(172464.000000,198912.000000,53425.000000,3.049908)}
{pt3dadd(172296.000000,198876.000000,53450.000000,2.274954)}
{pt3dadd(172152.000000,198840.000000,53475.000000,2.274954)}
{pt3dadd(171948.000000,198864.000000,53575.000000,2.274954)}
{pt3dadd(171792.000000,198888.000000,53600.000000,3.460970)}
{pt3dadd(171660.000000,198768.000000,53625.000000,2.686016)}
{pt3dadd(171516.000000,198756.000000,53700.000000,2.686016)}
{pt3dadd(171372.000000,198804.000000,53675.000000,2.686016)}
{pt3dadd(171180.000000,198804.000000,53600.000000,3.675961)}
{pt3dadd(171048.000000,198852.000000,53575.000000,2.489945)}
{pt3dadd(170892.000000,198756.000000,53600.000000,2.489945)}
{pt3dadd(170736.000000,198804.000000,53550.000000,2.489945)}
{pt3dadd(170592.000000,198732.000000,53500.000000,3.737879)}
{pt3dadd(170448.000000,198696.000000,53450.000000,2.747934)}
{pt3dadd(170304.000000,198684.000000,53375.000000,2.747934)}
{pt3dadd(170160.000000,198696.000000,53325.000000,2.747934)}
{pt3dadd(170016.000000,198708.000000,53275.000000,3.933950)}
{pt3dadd(169680.000000,198732.000000,53200.000000,2.686016)}
{pt3dadd(169512.000000,198816.000000,53150.000000,2.686016)}
{pt3dadd(169308.000000,199056.000000,53225.000000,2.686016)}
{pt3dadd(169116.000000,199104.000000,53250.000000,3.281811)}
{pt3dadd(168924.000000,199260.000000,53200.000000,2.095795)}
{pt3dadd(168708.000000,199332.000000,53150.000000,2.095795)}
{pt3dadd(168504.000000,199488.000000,53250.000000,2.095795)}
{pt3dadd(168324.000000,199548.000000,53225.000000,3.343729)}
{pt3dadd(168180.000000,199608.000000,53200.000000,2.747934)}
{pt3dadd(168048.000000,199668.000000,53175.000000,3.343729)}
{pt3dadd(167880.000000,199728.000000,53150.000000,4.591663)}
{pt3dadd(167688.000000,199908.000000,53150.000000,4.572881)}
{pt3dadd(167496.000000,200088.000000,53150.000000,7.739669)}

{create adhoc7}
{access adhoc7}
{connect adhoc7(1), adhoc3(0)}
{nseg = 1}
{strdef color color = "White"}
{pt3dclear()}
{pt3dadd(181104.000000,197664.000000,55450.000000,33.279160)}
{pt3dadd(181332.000000,197736.000000,55825.000000,26.928090)}
{pt3dadd(181596.000000,197640.000000,56200.000000,16.756854)}
{pt3dadd(181716.000000,197688.000000,56600.000000,19.685420)}
{pt3dadd(181740.000000,197580.000000,56900.000000,10.784398)}
{pt3dadd(182184.000000,197592.000000,57250.000000,10.784398)}
{pt3dadd(182352.000000,197604.000000,57600.000000,10.784398)}
{pt3dadd(182532.000000,197556.000000,57975.000000,17.140230)}
{pt3dadd(182892.000000,197508.000000,58375.000000,7.855832)}
{pt3dadd(183024.000000,197556.000000,58650.000000,7.855832)}
{pt3dadd(183156.000000,197604.000000,59025.000000,7.855832)}
{pt3dadd(183288.000000,197652.000000,59375.000000,15.542830)}
{pt3dadd(183852.000000,197544.000000,59750.000000,9.186998)}
{pt3dadd(184032.000000,197568.000000,60100.000000,9.186998)}
{pt3dadd(184092.000000,197508.000000,60500.000000,9.186998)}
{pt3dadd(184536.000000,197424.000000,60825.000000,13.509103)}
{pt3dadd(184596.000000,197472.000000,61175.000000,5.822105)}
{pt3dadd(184656.000000,197484.000000,61500.000000,5.822105)}
{pt3dadd(184836.000000,197580.000000,61825.000000,5.822105)}
{pt3dadd(185088.000000,197748.000000,62200.000000,12.177937)}
{pt3dadd(185244.000000,197988.000000,62550.000000,7.855832)}
{pt3dadd(185064.000000,198264.000000,62925.000000,11.993054)}
{pt3dadd(185412.000000,198396.000000,63275.000000,15.544808)}
{pt3dadd(185508.000000,198120.000000,63625.000000,14.314960)}
{pt3dadd(185448.000000,196788.000000,64050.000000,19.258772)}

{create adhoc8}
{access adhoc8}
{connect adhoc8(1), adhoc7(0)}
{nseg = 1}
{strdef color color = "White"}
{pt3dclear()}
{pt3dadd(185448.000000,196788.000000,64050.000000,19.258772)}
{pt3dadd(183720.000000,195672.000000,63425.000000,18.012644)}
{pt3dadd(184104.000000,195156.000000,62925.000000,11.407586)}
{pt3dadd(184056.000000,194604.000000,62400.000000,15.542830)}
{pt3dadd(184008.000000,194328.000000,61925.000000,9.186998)}
{pt3dadd(184020.000000,194076.000000,61700.000000,9.186998)}
{pt3dadd(184056.000000,193788.000000,61500.000000,9.186998)}
{pt3dadd(184188.000000,193536.000000,61250.000000,16.873996)}
{pt3dadd(184680.000000,193272.000000,61000.000000,9.186998)}
{pt3dadd(184632.000000,193056.000000,60725.000000,9.186998)}
{pt3dadd(184944.000000,192864.000000,60700.000000,9.186998)}
{pt3dadd(185100.000000,192660.000000,60675.000000,16.873996)}
{pt3dadd(185184.000000,192492.000000,60425.000000,9.186998)}
{pt3dadd(185232.000000,192324.000000,60375.000000,9.186998)}
{pt3dadd(185292.000000,192132.000000,60325.000000,9.186998)}
{pt3dadd(185304.000000,191916.000000,59975.000000,16.873996)}
{pt3dadd(185364.000000,191700.000000,59850.000000,9.186998)}
{pt3dadd(185580.000000,191544.000000,59925.000000,9.186998)}
{pt3dadd(185664.000000,191292.000000,59875.000000,9.186998)}
{pt3dadd(185772.000000,191004.000000,59625.000000,14.433524)}
{pt3dadd(185868.000000,190752.000000,59375.000000,6.746526)}
{pt3dadd(186012.000000,190488.000000,59250.000000,6.746526)}
{pt3dadd(185916.000000,190296.000000,59300.000000,6.746526)}
{pt3dadd(185868.000000,190116.000000,59325.000000,11.993053)}
{pt3dadd(185820.000000,189912.000000,59300.000000,6.746526)}
{pt3dadd(185772.000000,189708.000000,59150.000000,6.746526)}
{pt3dadd(185832.000000,189504.000000,58950.000000,6.746526)}
{pt3dadd(185964.000000,189252.000000,58950.000000,14.433524)}
{pt3dadd(185940.000000,189048.000000,58800.000000,9.186998)}
{pt3dadd(185916.000000,188844.000000,58650.000000,9.186998)}
{pt3dadd(186024.000000,188616.000000,58675.000000,9.186998)}
{pt3dadd(186132.000000,188376.000000,58700.000000,16.873996)}
{pt3dadd(186192.000000,188196.000000,58750.000000,9.186998)}
{pt3dadd(186252.000000,187956.000000,58800.000000,9.186998)}
{pt3dadd(186336.000000,187728.000000,58800.000000,9.186998)}
{pt3dadd(186264.000000,187488.000000,58725.000000,15.542830)}
{pt3dadd(186216.000000,187272.000000,58725.000000,7.855832)}
{pt3dadd(186276.000000,187056.000000,58825.000000,7.855832)}
{pt3dadd(186492.000000,186852.000000,58750.000000,7.855832)}
{pt3dadd(186708.000000,186648.000000,58675.000000,15.542830)}
{pt3dadd(186924.000000,186468.000000,58475.000000,9.186998)}
{pt3dadd(186984.000000,186300.000000,58350.000000,9.186998)}
{pt3dadd(187044.000000,186120.000000,58350.000000,9.186998)}
{pt3dadd(187104.000000,185916.000000,58350.000000,16.873996)}
{pt3dadd(187164.000000,185724.000000,58350.000000,9.186998)}
{pt3dadd(187224.000000,185496.000000,58375.000000,9.186998)}
{pt3dadd(187284.000000,185268.000000,58400.000000,9.186998)}
{pt3dadd(187464.000000,185016.000000,58425.000000,20.388275)}
{pt3dadd(187620.000000,184788.000000,58350.000000,12.701277)}
{pt3dadd(187776.000000,184572.000000,58275.000000,12.701277)}
{pt3dadd(187884.000000,184320.000000,58150.000000,12.701277)}
{pt3dadd(187992.000000,184092.000000,58025.000000,23.000854)}
{pt3dadd(188028.000000,183912.000000,58025.000000,11.799577)}
{pt3dadd(188112.000000,183720.000000,58025.000000,11.799577)}
{pt3dadd(188196.000000,183504.000000,58025.000000,11.799577)}
{pt3dadd(188280.000000,183324.000000,58025.000000,21.083975)}
{pt3dadd(188364.000000,183144.000000,58025.000000,10.784398)}
{pt3dadd(188448.000000,182988.000000,58025.000000,10.784398)}
{pt3dadd(188532.000000,182796.000000,58025.000000,10.784398)}
{pt3dadd(188616.000000,182604.000000,58025.000000,19.685420)}
{pt3dadd(189156.000000,182352.000000,58025.000000,10.401022)}
{pt3dadd(189240.000000,182100.000000,57925.000000,10.401022)}
{pt3dadd(189348.000000,181872.000000,58075.000000,10.401022)}
{pt3dadd(189360.000000,181680.000000,58000.000000,18.088020)}
{pt3dadd(189372.000000,181476.000000,57925.000000,9.186998)}
{pt3dadd(189480.000000,181236.000000,57975.000000,9.186998)}
{pt3dadd(189588.000000,181032.000000,58025.000000,9.186998)}
{pt3dadd(189696.000000,180816.000000,57800.000000,13.509103)}
{pt3dadd(189804.000000,180588.000000,57850.000000,5.822105)}
{pt3dadd(189912.000000,180384.000000,57900.000000,5.822105)}
{pt3dadd(190104.000000,180492.000000,57700.000000,5.822105)}
{pt3dadd(190320.000000,180168.000000,57575.000000,11.068632)}
{pt3dadd(190548.000000,179640.000000,57600.000000,6.746526)}
{pt3dadd(190752.000000,179292.000000,57700.000000,6.746526)}
{pt3dadd(190944.000000,179328.000000,57725.000000,6.746526)}
{pt3dadd(191148.000000,179136.000000,57725.000000,11.993053)}
{pt3dadd(191340.000000,178836.000000,57700.000000,6.746526)}
{pt3dadd(191556.000000,178380.000000,57500.000000,6.746526)}
{pt3dadd(191748.000000,178188.000000,57400.000000,6.746526)}
{pt3dadd(191940.000000,178068.000000,57050.000000,14.433524)}
{pt3dadd(192180.000000,177900.000000,57100.000000,9.186998)}
{pt3dadd(192420.000000,177684.000000,57025.000000,9.186998)}
{pt3dadd(192552.000000,177432.000000,57075.000000,9.186998)}
{pt3dadd(192432.000000,177204.000000,57150.000000,18.088020)}
{pt3dadd(192612.000000,176988.000000,56850.000000,10.401022)}
{pt3dadd(192744.000000,176748.000000,56825.000000,10.401022)}
{pt3dadd(192696.000000,176508.000000,56825.000000,10.401022)}
{pt3dadd(192780.000000,176292.000000,56675.000000,19.685420)}
{pt3dadd(192864.000000,176100.000000,56525.000000,10.784398)}
{pt3dadd(192900.000000,175908.000000,56150.000000,10.784398)}
{pt3dadd(192852.000000,175692.000000,56275.000000,10.784398)}
{pt3dadd(192828.000000,175464.000000,56125.000000,18.471396)}
{pt3dadd(192804.000000,175272.000000,55975.000000,9.186998)}
{pt3dadd(192816.000000,175056.000000,55975.000000,9.186998)}
{pt3dadd(192828.000000,174840.000000,55800.000000,9.186998)}
{pt3dadd(192840.000000,174624.000000,55775.000000,18.471396)}
{pt3dadd(192852.000000,174432.000000,55650.000000,10.784398)}
{pt3dadd(192888.000000,174204.000000,55625.000000,10.784398)}
{pt3dadd(192924.000000,173988.000000,55600.000000,10.784398)}
{pt3dadd(192828.000000,173748.000000,55550.000000,16.873996)}
{pt3dadd(192636.000000,173556.000000,55300.000000,7.589598)}
{pt3dadd(192516.000000,173268.000000,55200.000000,7.589598)}
{pt3dadd(192396.000000,173052.000000,55100.000000,7.589598)}
{pt3dadd(192432.000000,172812.000000,55075.000000,16.873996)}
{pt3dadd(192468.000000,172644.000000,55050.000000,10.784398)}
{pt3dadd(192480.000000,172440.000000,55350.000000,10.784398)}
{pt3dadd(192696.000000,172176.000000,55475.000000,10.784398)}
{pt3dadd(192756.000000,171912.000000,55850.000000,15.809063)}
{pt3dadd(192864.000000,171672.000000,56075.000000,6.524665)}
{pt3dadd(192972.000000,171444.000000,56300.000000,6.524665)}
{pt3dadd(193080.000000,171252.000000,56425.000000,6.524665)}
{pt3dadd(193164.000000,171084.000000,56425.000000,9.434460)}
{pt3dadd(193248.000000,170892.000000,56500.000000,4.409795)}
{pt3dadd(193128.000000,170688.000000,56550.000000,4.409795)}
{pt3dadd(193140.000000,170496.000000,56575.000000,4.409795)}
{pt3dadd(193152.000000,170280.000000,56700.000000,7.961550)}
{pt3dadd(193332.000000,170064.000000,56775.000000,5.051754)}
{pt3dadd(193440.000000,169872.000000,56750.000000,5.051754)}
{pt3dadd(193932.000000,169608.000000,57000.000000,5.051754)}
{pt3dadd(194040.000000,169308.000000,56925.000000,9.373860)}
{pt3dadd(193920.000000,168960.000000,57275.000000,5.822105)}
{pt3dadd(193848.000000,168708.000000,57250.000000,5.822105)}
{pt3dadd(193776.000000,168384.000000,57225.000000,5.822105)}
{pt3dadd(193704.000000,168096.000000,57200.000000,8.731901)}
{pt3dadd(193740.000000,167784.000000,57425.000000,4.409795)}
{pt3dadd(193776.000000,167496.000000,57650.000000,4.409795)}
{pt3dadd(193752.000000,167220.000000,57350.000000,4.409795)}
{pt3dadd(193860.000000,166896.000000,57800.000000,9.656322)}
{pt3dadd(193788.000000,166608.000000,57725.000000,6.746526)}
{pt3dadd(193560.000000,166332.000000,57700.000000,6.746526)}
{pt3dadd(193644.000000,166080.000000,57475.000000,6.746526)}
{pt3dadd(193512.000000,165840.000000,57500.000000,13.102358)}
{pt3dadd(193800.000000,165552.000000,57225.000000,7.855832)}
{pt3dadd(193812.000000,165312.000000,57125.000000,7.855832)}
{pt3dadd(193944.000000,165036.000000,57025.000000,7.855832)}
{pt3dadd(194364.000000,164784.000000,57050.000000,11.407586)}
{pt3dadd(194808.000000,164556.000000,57200.000000,5.051754)}
{pt3dadd(195096.000000,164328.000000,57250.000000,5.051754)}
{pt3dadd(195000.000000,164064.000000,57150.000000,5.051754)}
{pt3dadd(195240.000000,163800.000000,57050.000000,9.373860)}
{pt3dadd(195252.000000,163512.000000,57100.000000,5.822105)}
{pt3dadd(195408.000000,163224.000000,57125.000000,5.822105)}
{pt3dadd(195384.000000,162888.000000,57250.000000,5.822105)}
{pt3dadd(195600.000000,162624.000000,57150.000000,11.068632)}
{pt3dadd(195612.000000,162360.000000,57050.000000,6.746526)}
{pt3dadd(195624.000000,162108.000000,56950.000000,6.746526)}
{pt3dadd(195576.000000,161844.000000,57075.000000,6.746526)}
{pt3dadd(195588.000000,161592.000000,56775.000000,13.102358)}
{pt3dadd(195588.000000,161340.000000,56725.000000,7.855832)}
{pt3dadd(195600.000000,161112.000000,56675.000000,7.855832)}
{pt3dadd(195432.000000,160884.000000,56725.000000,7.855832)}
{pt3dadd(195264.000000,160668.000000,56775.000000,17.140230)}
{pt3dadd(195144.000000,160416.000000,56525.000000,10.784398)}
{pt3dadd(195228.000000,160200.000000,56550.000000,10.784398)}
{pt3dadd(195132.000000,160008.000000,56325.000000,10.784398)}
{pt3dadd(195036.000000,159816.000000,56400.000000,16.030924)}
{pt3dadd(194844.000000,159564.000000,56425.000000,6.746526)}
{pt3dadd(194796.000000,159360.000000,56375.000000,6.746526)}
{pt3dadd(194748.000000,159132.000000,56325.000000,6.746526)}
{pt3dadd(194700.000000,158916.000000,56275.000000,11.068632)}
{pt3dadd(194712.000000,158712.000000,56500.000000,5.822105)}
{pt3dadd(194688.000000,158484.000000,56575.000000,5.822105)}
{pt3dadd(194664.000000,158256.000000,56400.000000,5.822105)}
{pt3dadd(194568.000000,157980.000000,56525.000000,11.068632)}
{pt3dadd(194520.000000,157788.000000,56400.000000,6.746526)}
{pt3dadd(194760.000000,157608.000000,56400.000000,6.746526)}
{pt3dadd(194616.000000,157428.000000,56625.000000,6.746526)}
{pt3dadd(194592.000000,157248.000000,56575.000000,10.883748)}
{pt3dadd(194496.000000,157080.000000,56475.000000,5.637221)}
{pt3dadd(194556.000000,156924.000000,56375.000000,5.637221)}
{pt3dadd(194364.000000,156768.000000,56375.000000,5.637221)}
{pt3dadd(194448.000000,156576.000000,56400.000000,10.883748)}
{pt3dadd(194556.000000,156384.000000,56475.000000,6.746526)}
{pt3dadd(194460.000000,156192.000000,56350.000000,6.746526)}
{pt3dadd(194436.000000,156000.000000,56325.000000,6.746526)}
{pt3dadd(194496.000000,155832.000000,56400.000000,13.102358)}
{pt3dadd(194508.000000,155652.000000,56425.000000,7.855832)}
{pt3dadd(194520.000000,155448.000000,56425.000000,7.855832)}
{pt3dadd(194532.000000,155268.000000,56425.000000,7.855832)}
{pt3dadd(194484.000000,155088.000000,56375.000000,13.102358)}
{pt3dadd(194436.000000,154920.000000,56325.000000,6.746526)}
{pt3dadd(194388.000000,154716.000000,56275.000000,6.746526)}
{pt3dadd(194316.000000,154536.000000,56425.000000,6.746526)}
{pt3dadd(194244.000000,154344.000000,56425.000000,11.068632)}
{pt3dadd(194172.000000,154164.000000,56425.000000,5.822105)}
{pt3dadd(194412.000000,153924.000000,56600.000000,5.822105)}
{pt3dadd(194472.000000,153744.000000,56700.000000,5.822105)}
{pt3dadd(194532.000000,153564.000000,56825.000000,10.144211)}
{pt3dadd(194592.000000,153384.000000,56950.000000,5.822105)}
{pt3dadd(194652.000000,153168.000000,57075.000000,5.822105)}
{pt3dadd(194712.000000,152976.000000,57200.000000,5.822105)}
{pt3dadd(194748.000000,152760.000000,57150.000000,11.068632)}
{pt3dadd(194784.000000,152532.000000,57100.000000,6.746526)}
{pt3dadd(194796.000000,152340.000000,57225.000000,6.746526)}
{pt3dadd(194808.000000,152136.000000,57350.000000,6.746526)}
{pt3dadd(194820.000000,151932.000000,57425.000000,11.993053)}
{pt3dadd(194832.000000,151740.000000,57500.000000,6.746526)}
{pt3dadd(194784.000000,151524.000000,57400.000000,6.746526)}
{pt3dadd(194736.000000,151332.000000,57300.000000,6.746526)}
{pt3dadd(194688.000000,151164.000000,57225.000000,11.993053)}
{pt3dadd(194748.000000,150972.000000,57575.000000,6.746526)}
{pt3dadd(194808.000000,150780.000000,57525.000000,6.746526)}
{pt3dadd(194868.000000,150600.000000,57475.000000,14.114045)}
{pt3dadd(194928.000000,150408.000000,57425.000000,15.671565)}
{pt3dadd(194988.000000,150216.000000,57375.000000,16.375065)}
{pt3dadd(195048.000000,150036.000000,57400.000000,9.287602)}

{create adhoc9}
{access adhoc9}
{connect adhoc9(1), adhoc8(0)}
{nseg = 1}
{strdef color color = "White"}
{pt3dclear()}
{pt3dadd(195048.000000,150036.000000,57400.000000,9.287602)}
{pt3dadd(194724.000000,149772.000000,57200.000000,12.840078)}
{pt3dadd(194832.000000,149484.000000,57125.000000,8.304047)}
{pt3dadd(194976.000000,149208.000000,56825.000000,11.993053)}
{pt3dadd(195060.000000,148920.000000,56800.000000,6.746526)}
{pt3dadd(195168.000000,148632.000000,56675.000000,6.746526)}
{pt3dadd(195180.000000,148380.000000,56625.000000,6.746526)}
{pt3dadd(195144.000000,148140.000000,56525.000000,9.121356)}
{pt3dadd(195108.000000,147936.000000,56425.000000,3.874829)}
{pt3dadd(194916.000000,147744.000000,56425.000000,3.874829)}
{pt3dadd(194916.000000,147540.000000,56375.000000,3.874829)}
{pt3dadd(194844.000000,147372.000000,56350.000000,8.196935)}
{pt3dadd(194796.000000,147180.000000,56375.000000,5.822105)}
{pt3dadd(194748.000000,147000.000000,56300.000000,5.822105)}
{pt3dadd(194700.000000,146832.000000,56225.000000,5.822105)}
{pt3dadd(194652.000000,146652.000000,56250.000000,10.144211)}
{pt3dadd(194604.000000,146472.000000,56275.000000,5.822105)}
{pt3dadd(194556.000000,146292.000000,56300.000000,5.822105)}
{pt3dadd(194556.000000,146124.000000,56200.000000,5.822105)}
{pt3dadd(194556.000000,145980.000000,56100.000000,11.068632)}
{pt3dadd(194556.000000,145812.000000,56000.000000,6.746526)}
{pt3dadd(194556.000000,145632.000000,55900.000000,6.746526)}
{pt3dadd(194544.000000,145440.000000,55950.000000,6.746526)}
{pt3dadd(194616.000000,145260.000000,56175.000000,13.102358)}
{pt3dadd(194640.000000,145092.000000,56125.000000,7.855832)}
{pt3dadd(194640.000000,144924.000000,56250.000000,7.855832)}
{pt3dadd(194592.000000,144756.000000,56150.000000,7.855832)}
{pt3dadd(194544.000000,144564.000000,56225.000000,14.211664)}
{pt3dadd(194460.000000,144384.000000,56200.000000,7.855832)}
{pt3dadd(194376.000000,144204.000000,56175.000000,7.855832)}
{pt3dadd(194400.000000,144012.000000,56250.000000,7.855832)}
{pt3dadd(194400.000000,143784.000000,56225.000000,13.102358)}
{pt3dadd(194400.000000,143580.000000,56200.000000,6.746526)}
{pt3dadd(194400.000000,143436.000000,56200.000000,6.746526)}
{pt3dadd(194400.000000,143232.000000,56325.000000,6.746526)}
{pt3dadd(194400.000000,143064.000000,56450.000000,10.298281)}
{pt3dadd(194388.000000,142896.000000,56525.000000,5.051754)}
{pt3dadd(194376.000000,142740.000000,56600.000000,5.051754)}
{pt3dadd(194400.000000,142524.000000,56625.000000,5.051754)}
{pt3dadd(194328.000000,142284.000000,56575.000000,8.603509)}
{pt3dadd(194280.000000,142104.000000,56600.000000,5.051754)}
{pt3dadd(194388.000000,141876.000000,56550.000000,5.051754)}
{pt3dadd(194460.000000,141672.000000,56575.000000,5.051754)}
{pt3dadd(194532.000000,141516.000000,56600.000000,9.373860)}
{pt3dadd(194460.000000,141288.000000,56675.000000,5.822105)}
{pt3dadd(194388.000000,141060.000000,56750.000000,5.822105)}
{pt3dadd(194316.000000,140832.000000,56825.000000,5.822105)}
{pt3dadd(194244.000000,140628.000000,56900.000000,8.731901)}
{pt3dadd(194172.000000,140400.000000,56975.000000,4.409795)}
{pt3dadd(194100.000000,140208.000000,57050.000000,4.409795)}
{pt3dadd(194088.000000,140004.000000,57025.000000,4.409795)}
{pt3dadd(194172.000000,139812.000000,57125.000000,7.319591)}
{pt3dadd(194112.000000,139620.000000,57175.000000,4.409795)}
{pt3dadd(194136.000000,139392.000000,57150.000000,4.409795)}
{pt3dadd(194160.000000,139212.000000,57250.000000,4.409795)}
{pt3dadd(194088.000000,139044.000000,57375.000000,9.656322)}
{pt3dadd(194196.000000,138864.000000,57725.000000,6.746526)}
{pt3dadd(194256.000000,138636.000000,57750.000000,6.746526)}
{pt3dadd(194280.000000,138420.000000,57800.000000,6.746526)}
{pt3dadd(194304.000000,138216.000000,57850.000000,13.102358)}
{pt3dadd(194268.000000,138012.000000,57850.000000,7.855832)}
{pt3dadd(194256.000000,137820.000000,57900.000000,7.855832)}
{pt3dadd(194244.000000,137652.000000,57950.000000,7.855832)}
{pt3dadd(194280.000000,137460.000000,57925.000000,13.102358)}
{pt3dadd(194424.000000,137280.000000,58025.000000,6.746526)}
{pt3dadd(194424.000000,137100.000000,58000.000000,6.746526)}
{pt3dadd(194292.000000,136908.000000,58000.000000,6.746526)}
{pt3dadd(194388.000000,136692.000000,58100.000000,13.102358)}
{pt3dadd(194400.000000,136536.000000,58175.000000,7.855832)}
{pt3dadd(194364.000000,136356.000000,58175.000000,7.855832)}
{pt3dadd(194376.000000,136104.000000,58225.000000,7.855832)}
{pt3dadd(194424.000000,135924.000000,58300.000000,15.542830)}
{pt3dadd(194472.000000,135756.000000,58375.000000,9.186998)}
{pt3dadd(194520.000000,135588.000000,58450.000000,9.186998)}
{pt3dadd(194460.000000,135396.000000,58600.000000,9.186998)}
{pt3dadd(194364.000000,135240.000000,58625.000000,15.542830)}
{pt3dadd(194376.000000,135072.000000,58675.000000,7.855832)}
{pt3dadd(194352.000000,134904.000000,58725.000000,7.855832)}
{pt3dadd(194304.000000,134724.000000,59125.000000,7.855832)}
{pt3dadd(194328.000000,134556.000000,59400.000000,13.102358)}
{pt3dadd(194340.000000,134352.000000,59450.000000,6.746526)}
{pt3dadd(194256.000000,134196.000000,59650.000000,6.746526)}
{pt3dadd(194316.000000,134016.000000,59625.000000,6.746526)}
{pt3dadd(194340.000000,133848.000000,59600.000000,11.993053)}
{pt3dadd(194292.000000,133668.000000,59650.000000,6.746526)}
{pt3dadd(194304.000000,133524.000000,59750.000000,6.746526)}
{pt3dadd(194316.000000,133380.000000,59800.000000,6.746526)}
{pt3dadd(194280.000000,133224.000000,59825.000000,11.993053)}
{pt3dadd(194244.000000,133068.000000,59875.000000,6.746526)}
{pt3dadd(194208.000000,132888.000000,60000.000000,6.746526)}
{pt3dadd(194232.000000,132732.000000,60075.000000,6.746526)}
{pt3dadd(194100.000000,132504.000000,60175.000000,11.993053)}
{pt3dadd(194064.000000,132300.000000,60150.000000,6.746526)}
{pt3dadd(194028.000000,132156.000000,60150.000000,6.746526)}
{pt3dadd(193992.000000,132024.000000,60150.000000,6.746526)}
{pt3dadd(193884.000000,131880.000000,60200.000000,11.068632)}
{pt3dadd(193776.000000,131700.000000,60250.000000,5.822105)}
{pt3dadd(193668.000000,131520.000000,60300.000000,5.822105)}
{pt3dadd(193584.000000,131340.000000,60400.000000,5.822105)}
{pt3dadd(193608.000000,131196.000000,60525.000000,10.144211)}
{pt3dadd(193608.000000,131052.000000,60575.000000,5.822105)}
{pt3dadd(193608.000000,130848.000000,60625.000000,5.822105)}
{pt3dadd(193560.000000,130620.000000,60675.000000,5.822105)}
{pt3dadd(193512.000000,130440.000000,60725.000000,12.177937)}
{pt3dadd(193584.000000,130284.000000,60725.000000,7.855832)}
{pt3dadd(193476.000000,130092.000000,60900.000000,7.855832)}
{pt3dadd(193380.000000,129936.000000,60900.000000,7.855832)}
{pt3dadd(193380.000000,129708.000000,60900.000000,14.211664)}
{pt3dadd(193344.000000,129528.000000,60975.000000,7.855832)}
{pt3dadd(193272.000000,129324.000000,60975.000000,7.855832)}
{pt3dadd(193200.000000,129144.000000,60975.000000,7.855832)}
{pt3dadd(193224.000000,128976.000000,60950.000000,12.177937)}
{pt3dadd(193284.000000,128784.000000,61000.000000,5.822105)}
{pt3dadd(193308.000000,128604.000000,60975.000000,5.822105)}
{pt3dadd(193332.000000,128424.000000,60950.000000,5.822105)}
{pt3dadd(193356.000000,128268.000000,60925.000000,9.373860)}
{pt3dadd(193380.000000,128100.000000,60900.000000,5.051754)}
{pt3dadd(193404.000000,127908.000000,60750.000000,5.051754)}
{pt3dadd(193416.000000,127704.000000,60775.000000,5.051754)}
{pt3dadd(193428.000000,127464.000000,60800.000000,8.603509)}
{pt3dadd(193440.000000,127284.000000,60825.000000,5.051754)}
{pt3dadd(193404.000000,127116.000000,60775.000000,5.051754)}
{pt3dadd(193380.000000,126888.000000,60825.000000,5.051754)}
{pt3dadd(193356.000000,126684.000000,60875.000000,9.373860)}
{pt3dadd(193248.000000,126492.000000,60900.000000,5.822105)}
{pt3dadd(193212.000000,126324.000000,60875.000000,5.822105)}
{pt3dadd(193200.000000,126132.000000,61100.000000,5.822105)}
{pt3dadd(193188.000000,125928.000000,61325.000000,10.144211)}
{pt3dadd(193092.000000,125712.000000,61300.000000,5.822105)}
{pt3dadd(193164.000000,125484.000000,61300.000000,5.822105)}
{pt3dadd(193056.000000,125292.000000,61475.000000,5.822105)}
{pt3dadd(193164.000000,125100.000000,61550.000000,11.068632)}
{pt3dadd(193260.000000,124896.000000,61700.000000,6.746526)}
{pt3dadd(193356.000000,124716.000000,61850.000000,6.746526)}
{pt3dadd(193356.000000,124536.000000,61900.000000,6.746526)}
{pt3dadd(193356.000000,124344.000000,61950.000000,11.993053)}
{pt3dadd(193356.000000,124152.000000,62000.000000,6.746526)}
{pt3dadd(193356.000000,123912.000000,62050.000000,6.746526)}
{pt3dadd(193236.000000,123732.000000,62200.000000,6.746526)}
{pt3dadd(193116.000000,123540.000000,62350.000000,11.771192)}
{pt3dadd(193104.000000,123336.000000,62525.000000,6.524665)}
{pt3dadd(193068.000000,123000.000000,62900.000000,6.524665)}
{pt3dadd(193164.000000,122352.000000,63125.000000,6.524665)}
{pt3dadd(193188.000000,122160.000000,63450.000000,14.211663)}
{pt3dadd(193152.000000,121980.000000,63725.000000,9.186998)}
{pt3dadd(193068.000000,121752.000000,63925.000000,9.186998)}
{pt3dadd(193080.000000,121560.000000,64150.000000,9.186998)}
{pt3dadd(193176.000000,121620.000000,64500.000000,13.509103)}
{pt3dadd(193068.000000,121440.000000,64850.000000,5.822105)}
{pt3dadd(193008.000000,121176.000000,65100.000000,5.822105)}
{pt3dadd(193104.000000,121092.000000,65375.000000,5.822105)}
{pt3dadd(193128.000000,120888.000000,65625.000000,8.731901)}
{pt3dadd(193116.000000,120780.000000,65875.000000,4.409795)}
{pt3dadd(193404.000000,120312.000000,66125.000000,4.409795)}
{pt3dadd(193404.000000,120108.000000,66375.000000,4.409795)}
{pt3dadd(193464.000000,120084.000000,66650.000000,8.731901)}
{pt3dadd(193464.000000,119952.000000,66900.000000,5.822105)}
{pt3dadd(193380.000000,119772.000000,67200.000000,5.822105)}
{pt3dadd(193404.000000,119652.000000,67500.000000,5.822105)}
{pt3dadd(193356.000000,119580.000000,67800.000000,11.068632)}
{pt3dadd(193248.000000,119532.000000,68050.000000,6.746526)}
{pt3dadd(193140.000000,119352.000000,68325.000000,6.746526)}
{pt3dadd(192996.000000,119364.000000,68550.000000,6.746526)}
{pt3dadd(192852.000000,119184.000000,68775.000000,13.102358)}
{pt3dadd(192744.000000,119088.000000,69100.000000,7.855832)}
{pt3dadd(192612.000000,119100.000000,69375.000000,7.855832)}
{pt3dadd(192480.000000,119112.000000,69650.000000,7.855832)}
{pt3dadd(192324.000000,118836.000000,69925.000000,13.102358)}
{pt3dadd(192348.000000,118704.000000,70175.000000,6.746526)}
{pt3dadd(192240.000000,118416.000000,70475.000000,6.746526)}
{pt3dadd(192288.000000,118080.000000,70725.000000,6.746526)}
{pt3dadd(192252.000000,117720.000000,70975.000000,11.068632)}
{pt3dadd(192276.000000,117336.000000,71200.000000,5.822105)}
{pt3dadd(192156.000000,116964.000000,71425.000000,5.822105)}
{pt3dadd(192120.000000,116796.000000,71675.000000,5.822105)}
{pt3dadd(191964.000000,116544.000000,71875.000000,8.196935)}
{pt3dadd(191976.000000,116304.000000,72075.000000,3.874829)}
{pt3dadd(191760.000000,116100.000000,71925.000000,3.874829)}
{pt3dadd(191796.000000,115908.000000,72125.000000,3.874829)}
{pt3dadd(191724.000000,115752.000000,72100.000000,5.803854)}
{pt3dadd(191736.000000,115560.000000,72150.000000,3.429025)}
{pt3dadd(191748.000000,115392.000000,72125.000000,3.429025)}
{pt3dadd(191832.000000,115212.000000,72250.000000,3.429025)}
{pt3dadd(191760.000000,115044.000000,72300.000000,6.980779)}
{pt3dadd(191784.000000,114876.000000,72275.000000,5.051754)}
{pt3dadd(191796.000000,114672.000000,72375.000000,5.051754)}
{pt3dadd(191688.000000,114492.000000,72550.000000,5.051754)}
{pt3dadd(191712.000000,114324.000000,72650.000000,8.603509)}
{pt3dadd(191736.000000,114192.000000,72725.000000,5.051754)}
{pt3dadd(191688.000000,114036.000000,72800.000000,5.051754)}
{pt3dadd(191652.000000,113880.000000,72825.000000,5.051754)}
{pt3dadd(191616.000000,113712.000000,72850.000000,7.961550)}
{pt3dadd(191484.000000,113544.000000,72750.000000,4.409795)}
{pt3dadd(191352.000000,113400.000000,72650.000000,4.409795)}
{pt3dadd(191388.000000,113220.000000,72675.000000,4.409795)}
{pt3dadd(191196.000000,113076.000000,72650.000000,7.319591)}
{pt3dadd(191028.000000,112932.000000,72650.000000,4.409795)}
{pt3dadd(190920.000000,112764.000000,72550.000000,4.409795)}
{pt3dadd(190872.000000,112608.000000,72575.000000,4.409795)}
{pt3dadd(190800.000000,112440.000000,72525.000000,6.784625)}
{pt3dadd(190560.000000,112272.000000,72500.000000,3.874829)}
{pt3dadd(190560.000000,112128.000000,72450.000000,3.874829)}
{pt3dadd(190380.000000,111972.000000,72475.000000,3.874829)}
{pt3dadd(190176.000000,111816.000000,72500.000000,6.784625)}
{pt3dadd(190068.000000,111684.000000,72425.000000,4.409795)}
{pt3dadd(190008.000000,111552.000000,72475.000000,4.409795)}
{pt3dadd(189912.000000,111420.000000,72525.000000,4.409795)}
{pt3dadd(189816.000000,111204.000000,72500.000000,7.319591)}
{pt3dadd(189660.000000,111036.000000,72425.000000,4.409795)}
{pt3dadd(189540.000000,110880.000000,72400.000000,4.409795)}
{pt3dadd(189576.000000,110700.000000,72350.000000,4.409795)}
{pt3dadd(189480.000000,110556.000000,72350.000000,6.784625)}
{pt3dadd(189384.000000,110364.000000,72350.000000,3.874829)}
{pt3dadd(189336.000000,110172.000000,72250.000000,3.874829)}
{pt3dadd(189216.000000,109992.000000,72300.000000,3.874829)}
{pt3dadd(189228.000000,109800.000000,72225.000000,6.784625)}
{pt3dadd(189120.000000,109620.000000,72150.000000,4.409795)}
{pt3dadd(189000.000000,109452.000000,72150.000000,4.409795)}
{pt3dadd(188868.000000,109284.000000,72075.000000,4.409795)}
{pt3dadd(188736.000000,109092.000000,72075.000000,6.784625)}
{pt3dadd(188592.000000,108888.000000,72075.000000,3.874829)}
{pt3dadd(188556.000000,108696.000000,72100.000000,3.874829)}
{pt3dadd(188484.000000,108540.000000,72200.000000,3.874829)}
{pt3dadd(188376.000000,108360.000000,72175.000000,6.249659)}
{pt3dadd(188220.000000,108204.000000,72075.000000,3.874829)}
{pt3dadd(188148.000000,108060.000000,72075.000000,3.874829)}
{pt3dadd(188088.000000,107880.000000,72125.000000,3.874829)}
{pt3dadd(188040.000000,107700.000000,72175.000000,6.249659)}
{pt3dadd(187836.000000,107520.000000,72075.000000,3.874829)}
{pt3dadd(187656.000000,107304.000000,72100.000000,3.874829)}
{pt3dadd(187620.000000,107124.000000,71975.000000,3.874829)}
{pt3dadd(187608.000000,106944.000000,71925.000000,5.803854)}
{pt3dadd(187572.000000,106752.000000,71875.000000,3.429025)}
{pt3dadd(187392.000000,106512.000000,71850.000000,3.429025)}
{pt3dadd(187416.000000,106320.000000,71850.000000,3.429025)}
{pt3dadd(187320.000000,106140.000000,71800.000000,5.358049)}
{pt3dadd(187212.000000,105936.000000,71775.000000,3.429025)}
{pt3dadd(187116.000000,105744.000000,71825.000000,3.429025)}
{pt3dadd(187128.000000,105576.000000,71750.000000,3.429025)}
{pt3dadd(186948.000000,105408.000000,71850.000000,4.986545)}
{pt3dadd(186864.000000,105228.000000,71725.000000,3.057520)}
{pt3dadd(186732.000000,105024.000000,71750.000000,3.057520)}
{pt3dadd(186576.000000,104844.000000,71750.000000,3.057520)}
{pt3dadd(186468.000000,104640.000000,71800.000000,4.615041)}
{pt3dadd(186396.000000,104472.000000,71800.000000,3.057520)}
{pt3dadd(186408.000000,104304.000000,71775.000000,3.057520)}
{pt3dadd(186336.000000,104148.000000,71750.000000,3.057520)}
{pt3dadd(186252.000000,103956.000000,71875.000000,4.305454)}
{pt3dadd(186180.000000,103788.000000,71850.000000,2.747934)}
{pt3dadd(186072.000000,103608.000000,71825.000000,2.747934)}
{pt3dadd(185904.000000,103452.000000,71950.000000,2.747934)}
{pt3dadd(185832.000000,103272.000000,72000.000000,4.676958)}
{pt3dadd(185796.000000,103104.000000,72075.000000,3.429025)}
{pt3dadd(185640.000000,102912.000000,72050.000000,3.429025)}
{pt3dadd(185556.000000,102768.000000,72050.000000,3.429025)}
{pt3dadd(185508.000000,102612.000000,72075.000000,4.986545)}
{pt3dadd(185460.000000,102468.000000,72100.000000,3.057520)}
{pt3dadd(185292.000000,102324.000000,72075.000000,3.057520)}
{pt3dadd(185124.000000,102192.000000,72050.000000,3.057520)}
{pt3dadd(185004.000000,102072.000000,72100.000000,5.432350)}
{pt3dadd(184800.000000,101940.000000,72175.000000,3.874829)}
{pt3dadd(184620.000000,101796.000000,72100.000000,3.874829)}
{pt3dadd(184524.000000,101628.000000,72075.000000,3.874829)}
{pt3dadd(184344.000000,101472.000000,72025.000000,5.432350)}
{pt3dadd(184236.000000,101328.000000,72100.000000,3.057520)}
{pt3dadd(184116.000000,101148.000000,72075.000000,3.057520)}
{pt3dadd(183996.000000,100968.000000,72050.000000,3.057520)}
{pt3dadd(183888.000000,100812.000000,72050.000000,4.615041)}
{pt3dadd(183804.000000,100644.000000,72100.000000,3.057520)}
{pt3dadd(183756.000000,100476.000000,72000.000000,3.057520)}
{pt3dadd(183648.000000,100344.000000,72125.000000,3.057520)}
{pt3dadd(183540.000000,100200.000000,72100.000000,5.432350)}
{pt3dadd(183432.000000,100056.000000,72075.000000,3.874829)}
{pt3dadd(183384.000000,99876.000000,72100.000000,3.874829)}
{pt3dadd(183336.000000,99756.000000,72125.000000,3.874829)}
{pt3dadd(183000.000000,99564.000000,72250.000000,5.122763)}
{pt3dadd(182844.000000,99396.000000,72300.000000,2.747934)}
{pt3dadd(182568.000000,99252.000000,72450.000000,2.747934)}
{pt3dadd(182328.000000,99096.000000,72575.000000,2.747934)}
{pt3dadd(182196.000000,98928.000000,72650.000000,5.657729)}
{pt3dadd(182004.000000,98748.000000,72625.000000,4.409795)}
{pt3dadd(181764.000000,98568.000000,72775.000000,5.967316)}
{pt3dadd(181416.000000,98232.000000,72975.000000,7.215250)}
{pt3dadd(181440.000000,98100.000000,73375.000000,6.175757)}
{pt3dadd(181428.000000,97932.000000,73525.000000,7.739669)}

{create adhoc10}
{access adhoc10}
{connect adhoc10(1), adhoc8(0)}
{nseg = 1}
{strdef color color = "White"}
{pt3dclear()}
{pt3dadd(195048.000000,150036.000000,57400.000000,9.287602)}
{pt3dadd(195312.000000,149772.000000,58625.000000,12.840078)}
{pt3dadd(195168.000000,149496.000000,58875.000000,8.304047)}
{pt3dadd(195156.000000,148704.000000,59125.000000,9.656322)}
{pt3dadd(195084.000000,147480.000000,59300.000000,4.409795)}
{pt3dadd(195192.000000,146952.000000,59525.000000,4.409795)}
{pt3dadd(195240.000000,146640.000000,59425.000000,4.409795)}
{pt3dadd(195204.000000,146352.000000,59500.000000,7.961550)}
{pt3dadd(195252.000000,146124.000000,59450.000000,5.051754)}
{pt3dadd(195072.000000,145860.000000,59550.000000,5.051754)}
{pt3dadd(195156.000000,145596.000000,59600.000000,5.051754)}
{pt3dadd(195240.000000,145380.000000,59650.000000,6.609275)}
{pt3dadd(195024.000000,145188.000000,59675.000000,3.057520)}
{pt3dadd(194880.000000,144900.000000,59800.000000,3.057520)}
{pt3dadd(194604.000000,144696.000000,59775.000000,5.967316)}
{pt3dadd(194460.000000,144528.000000,59900.000000,8.235152)}
{pt3dadd(194568.000000,144312.000000,59800.000000,10.129386)}
{pt3dadd(194760.000000,144120.000000,59775.000000,12.839182)}

{create adhoc11}
{access adhoc11}
{connect adhoc11(1), adhoc10(0)}
{nseg = 1}
{strdef color color = "White"}
{pt3dclear()}
{pt3dadd(194760.000000,144120.000000,59775.000000,12.839182)}
{pt3dadd(194868.000000,143964.000000,59750.000000,10.129386)}
{pt3dadd(194820.000000,143748.000000,59700.000000,6.677632)}
{pt3dadd(194772.000000,143568.000000,59650.000000,6.784625)}
{pt3dadd(194724.000000,143376.000000,59600.000000,3.874829)}
{pt3dadd(194676.000000,143184.000000,59425.000000,3.874829)}
{pt3dadd(194784.000000,143016.000000,59475.000000,3.874829)}
{pt3dadd(194712.000000,142824.000000,59300.000000,7.426584)}
{pt3dadd(194664.000000,142620.000000,59200.000000,5.051754)}
{pt3dadd(194652.000000,142440.000000,59175.000000,5.051754)}
{pt3dadd(194484.000000,142272.000000,59100.000000,5.051754)}
{pt3dadd(194760.000000,142044.000000,59050.000000,7.961550)}
{pt3dadd(194568.000000,141768.000000,58975.000000,4.409795)}
{pt3dadd(194472.000000,141516.000000,59050.000000,4.409795)}
{pt3dadd(194508.000000,141300.000000,58975.000000,4.409795)}
{pt3dadd(194412.000000,141060.000000,58925.000000,5.595812)}
{pt3dadd(194400.000000,140820.000000,59050.000000,2.686016)}
{pt3dadd(194304.000000,140640.000000,59075.000000,2.686016)}
{pt3dadd(194364.000000,140448.000000,59050.000000,2.686016)}
{pt3dadd(194340.000000,140256.000000,59000.000000,5.595812)}
{pt3dadd(194220.000000,140100.000000,58975.000000,4.409795)}
{pt3dadd(194100.000000,139932.000000,58950.000000,4.409795)}
{pt3dadd(193980.000000,139776.000000,58925.000000,4.409795)}
{pt3dadd(193908.000000,139620.000000,59075.000000,5.967316)}
{pt3dadd(193716.000000,139440.000000,59125.000000,3.057520)}
{pt3dadd(193524.000000,139272.000000,59175.000000,3.057520)}
{pt3dadd(193608.000000,139128.000000,59150.000000,3.057520)}
{pt3dadd(193392.000000,138984.000000,59150.000000,4.615041)}
{pt3dadd(193260.000000,138828.000000,59225.000000,3.057520)}
{pt3dadd(193188.000000,138636.000000,59250.000000,3.057520)}
{pt3dadd(193092.000000,138468.000000,59150.000000,3.057520)}
{pt3dadd(193080.000000,138312.000000,59150.000000,4.615041)}
{pt3dadd(192984.000000,138132.000000,59125.000000,3.057520)}
{pt3dadd(192876.000000,137964.000000,59100.000000,3.057520)}
{pt3dadd(192588.000000,137772.000000,59100.000000,3.057520)}
{pt3dadd(192528.000000,137592.000000,59150.000000,4.615041)}
{pt3dadd(192468.000000,137412.000000,59200.000000,3.057520)}
{pt3dadd(192408.000000,137232.000000,59250.000000,3.057520)}
{pt3dadd(192348.000000,137088.000000,59275.000000,3.057520)}
{pt3dadd(192288.000000,136932.000000,59250.000000,4.615041)}
{pt3dadd(192108.000000,136812.000000,59450.000000,3.057520)}
{pt3dadd(191928.000000,136692.000000,59675.000000,3.057520)}
{pt3dadd(191532.000000,136020.000000,59950.000000,3.057520)}
{pt3dadd(191352.000000,135852.000000,60075.000000,6.609275)}
{pt3dadd(191340.000000,135684.000000,60300.000000,5.051754)}
{pt3dadd(191328.000000,135528.000000,60525.000000,5.051754)}
{pt3dadd(191340.000000,135300.000000,60425.000000,5.051754)}
{pt3dadd(191376.000000,135132.000000,60800.000000,7.426584)}
{pt3dadd(191388.000000,134940.000000,60950.000000,3.874829)}
{pt3dadd(191388.000000,134724.000000,61200.000000,3.874829)}
{pt3dadd(191484.000000,134520.000000,61375.000000,3.874829)}
{pt3dadd(191424.000000,134268.000000,61275.000000,4.864774)}
{pt3dadd(191424.000000,134124.000000,61300.000000,2.489945)}
{pt3dadd(191424.000000,133956.000000,61325.000000,2.489945)}
{pt3dadd(191424.000000,133800.000000,61300.000000,2.489945)}
{pt3dadd(191448.000000,133632.000000,61325.000000,3.737879)}
{pt3dadd(191472.000000,133488.000000,61300.000000,2.747934)}
{pt3dadd(191448.000000,133344.000000,61325.000000,2.747934)}
{pt3dadd(191496.000000,133188.000000,61400.000000,2.747934)}
{pt3dadd(191568.000000,133032.000000,61350.000000,4.305454)}
{pt3dadd(191676.000000,132864.000000,61525.000000,3.057520)}
{pt3dadd(191652.000000,132720.000000,61550.000000,3.057520)}
{pt3dadd(191676.000000,132588.000000,61625.000000,3.057520)}
{pt3dadd(191652.000000,132444.000000,61700.000000,4.047465)}
{pt3dadd(191688.000000,132300.000000,61800.000000,2.489945)}
{pt3dadd(191736.000000,132132.000000,61850.000000,2.489945)}
{pt3dadd(191844.000000,132000.000000,61925.000000,2.489945)}
{pt3dadd(191868.000000,131880.000000,61875.000000,4.047465)}
{pt3dadd(192120.000000,131724.000000,61925.000000,3.057520)}
{pt3dadd(192288.000000,131556.000000,61975.000000,3.057520)}
{pt3dadd(192372.000000,131400.000000,61925.000000,3.057520)}
{pt3dadd(192456.000000,131232.000000,62000.000000,5.432350)}
{pt3dadd(192504.000000,131064.000000,61950.000000,3.874829)}
{pt3dadd(192528.000000,130920.000000,61975.000000,3.874829)}
{pt3dadd(192552.000000,130740.000000,62000.000000,3.874829)}
{pt3dadd(192576.000000,130572.000000,62025.000000,6.249659)}
{pt3dadd(192576.000000,130404.000000,62175.000000,3.874829)}
{pt3dadd(192576.000000,130200.000000,62250.000000,3.874829)}
{pt3dadd(192612.000000,130020.000000,62275.000000,3.874829)}
{pt3dadd(192612.000000,129828.000000,62375.000000,6.249659)}
{pt3dadd(192612.000000,129660.000000,62500.000000,3.874829)}
{pt3dadd(192540.000000,129480.000000,62625.000000,3.874829)}
{pt3dadd(192444.000000,129348.000000,62800.000000,3.874829)}
{pt3dadd(192444.000000,129192.000000,62975.000000,6.249659)}
{pt3dadd(192492.000000,129084.000000,63025.000000,3.874829)}
{pt3dadd(192576.000000,129060.000000,63300.000000,3.874829)}
{pt3dadd(192588.000000,128952.000000,63525.000000,3.874829)}
{pt3dadd(192588.000000,128748.000000,63725.000000,6.142666)}
{pt3dadd(192564.000000,128376.000000,64000.000000,3.767836)}
{pt3dadd(192516.000000,128232.000000,64175.000000,3.767836)}
{pt3dadd(192456.000000,127980.000000,64375.000000,3.767836)}
{pt3dadd(192252.000000,127752.000000,64550.000000,6.142666)}
{pt3dadd(192192.000000,127476.000000,64775.000000,3.874829)}
{pt3dadd(192180.000000,127248.000000,65000.000000,4.864774)}
{pt3dadd(192168.000000,127068.000000,65250.000000,7.239604)}
{pt3dadd(192180.000000,126828.000000,65500.000000,7.107957)}
{pt3dadd(192084.000000,126720.000000,65750.000000,13.374147)}

{create adhoc12}
{access adhoc12}
{connect adhoc12(1), adhoc10(0)}
{nseg = 1}
{strdef color color = "White"}
{pt3dclear()}
{pt3dadd(194760.000000,144120.000000,59775.000000,12.839182)}
{pt3dadd(193596.000000,144240.000000,59625.000000,8.494768)}
{pt3dadd(193320.000000,143964.000000,59550.000000,5.696861)}
{pt3dadd(193080.000000,143724.000000,59425.000000,5.358049)}
{pt3dadd(192720.000000,143532.000000,59400.000000,3.429025)}
{pt3dadd(192360.000000,143340.000000,59375.000000,4.676958)}
{pt3dadd(191976.000000,143136.000000,59400.000000,5.272753)}
{pt3dadd(191592.000000,142956.000000,59425.000000,4.572881)}
{pt3dadd(191316.000000,142812.000000,59475.000000,4.478975)}

{create adhoc13}
{access adhoc13}
{connect adhoc13(1), adhoc7(0)}
{nseg = 1}
{strdef color color = "White"}
{pt3dclear()}
{pt3dadd(185448.000000,196788.000000,64050.000000,19.258772)}
{pt3dadd(185616.000000,199032.000000,64475.000000,20.231254)}
{pt3dadd(185736.000000,199488.000000,64925.000000,12.738752)}
{pt3dadd(185652.000000,199788.000000,64950.000000,18.471396)}
{pt3dadd(185760.000000,200112.000000,65175.000000,10.784398)}
{pt3dadd(185760.000000,200148.000000,65400.000000,10.784398)}
{pt3dadd(185748.000000,200184.000000,65625.000000,10.784398)}
{pt3dadd(185760.000000,200460.000000,65875.000000,20.068796)}
{pt3dadd(185952.000000,200256.000000,66125.000000,10.784398)}
{pt3dadd(185928.000000,200424.000000,66350.000000,10.784398)}
{pt3dadd(185964.000000,200520.000000,66575.000000,10.784398)}
{pt3dadd(186060.000000,200856.000000,66800.000000,17.140230)}
{pt3dadd(186144.000000,201012.000000,67000.000000,7.855832)}
{pt3dadd(186240.000000,201084.000000,67250.000000,7.855832)}
{pt3dadd(186252.000000,201288.000000,67525.000000,7.855832)}
{pt3dadd(186276.000000,201384.000000,67725.000000,15.542830)}
{pt3dadd(186264.000000,201780.000000,67975.000000,9.186998)}
{pt3dadd(186312.000000,201828.000000,68250.000000,9.186998)}
{pt3dadd(186372.000000,201852.000000,68500.000000,9.186998)}
{pt3dadd(186552.000000,201948.000000,68750.000000,14.433524)}
{pt3dadd(186732.000000,202044.000000,68975.000000,6.746526)}
{pt3dadd(186624.000000,202224.000000,69200.000000,6.746526)}
{pt3dadd(186828.000000,202332.000000,69400.000000,6.746526)}
{pt3dadd(186876.000000,202428.000000,69575.000000,13.102358)}
{pt3dadd(186792.000000,202584.000000,69800.000000,7.855832)}
{pt3dadd(186732.000000,202800.000000,70025.000000,7.855832)}
{pt3dadd(186924.000000,202920.000000,70275.000000,7.855832)}
{pt3dadd(187248.000000,202992.000000,70500.000000,13.102358)}
{pt3dadd(187320.000000,203088.000000,70725.000000,6.746526)}
{pt3dadd(187380.000000,203112.000000,70950.000000,6.746526)}
{pt3dadd(187488.000000,203196.000000,71150.000000,6.746526)}
{pt3dadd(187536.000000,203280.000000,71375.000000,14.433524)}
{pt3dadd(187584.000000,203364.000000,71575.000000,9.186998)}
{pt3dadd(187584.000000,203412.000000,71750.000000,9.186998)}
{pt3dadd(187548.000000,203484.000000,71975.000000,9.186998)}
{pt3dadd(187512.000000,203556.000000,72175.000000,20.388275)}
{pt3dadd(187620.000000,203652.000000,72425.000000,12.701277)}
{pt3dadd(187716.000000,203748.000000,72650.000000,12.701277)}
{pt3dadd(187776.000000,203748.000000,72850.000000,12.701277)}
{pt3dadd(187860.000000,203688.000000,73075.000000,26.202809)}
{pt3dadd(187944.000000,203628.000000,73250.000000,15.001532)}
{pt3dadd(188112.000000,203568.000000,73500.000000,15.001532)}
{pt3dadd(188184.000000,203580.000000,73750.000000,15.001532)}
{pt3dadd(188256.000000,203592.000000,73975.000000,28.503064)}
{pt3dadd(188328.000000,203604.000000,74200.000000,15.001532)}
{pt3dadd(188328.000000,203544.000000,74425.000000,15.001532)}
{pt3dadd(188520.000000,203556.000000,74650.000000,15.001532)}
{pt3dadd(188616.000000,203616.000000,74850.000000,28.503064)}
{pt3dadd(188604.000000,203688.000000,75075.000000,15.001532)}
{pt3dadd(188604.000000,203628.000000,75300.000000,15.001532)}
{pt3dadd(188724.000000,203640.000000,75550.000000,15.001532)}
{pt3dadd(188760.000000,203640.000000,75750.000000,31.263370)}
{pt3dadd(189000.000000,203604.000000,75975.000000,17.761838)}
{pt3dadd(189072.000000,203460.000000,76250.000000,17.761838)}
{pt3dadd(189048.000000,203508.000000,76475.000000,17.761838)}
{pt3dadd(189024.000000,203556.000000,76700.000000,28.503063)}
{pt3dadd(189276.000000,203628.000000,76950.000000,12.241225)}
{pt3dadd(189564.000000,203700.000000,77200.000000,12.241225)}
{pt3dadd(189600.000000,203688.000000,77400.000000,12.241225)}
{pt3dadd(189660.000000,203676.000000,77650.000000,28.503063)}
{pt3dadd(189720.000000,203676.000000,77875.000000,17.761838)}
{pt3dadd(189780.000000,203700.000000,78050.000000,17.761838)}
{pt3dadd(189840.000000,203724.000000,78225.000000,17.761838)}
{pt3dadd(189780.000000,203724.000000,78475.000000,37.717944)}
{pt3dadd(189720.000000,203724.000000,78725.000000,21.456106)}
{pt3dadd(189780.000000,203664.000000,78975.000000,21.456106)}
{pt3dadd(189852.000000,203640.000000,79175.000000,21.456106)}
{pt3dadd(189948.000000,203628.000000,79450.000000,37.717944)}
{pt3dadd(190020.000000,203640.000000,79625.000000,17.761838)}
{pt3dadd(190284.000000,203580.000000,79825.000000,17.761838)}
{pt3dadd(190356.000000,203472.000000,80100.000000,17.761838)}
{pt3dadd(190380.000000,203520.000000,80350.000000,31.263370)}
{pt3dadd(190752.000000,203460.000000,80600.000000,15.001532)}
{pt3dadd(190968.000000,203508.000000,80925.000000,15.001532)}
{pt3dadd(191208.000000,203436.000000,81175.000000,15.001532)}
{pt3dadd(191376.000000,203256.000000,81475.000000,31.263370)}
{pt3dadd(191544.000000,203292.000000,81775.000000,17.761838)}
{pt3dadd(191556.000000,203292.000000,81975.000000,17.761838)}
{pt3dadd(191796.000000,203316.000000,82300.000000,17.761838)}
{pt3dadd(191952.000000,203220.000000,82600.000000,31.263370)}
{pt3dadd(192036.000000,203076.000000,82825.000000,15.001532)}
{pt3dadd(192096.000000,203112.000000,83050.000000,15.001532)}
{pt3dadd(192156.000000,203148.000000,83300.000000,15.001532)}
{pt3dadd(192252.000000,203220.000000,83550.000000,28.503064)}
{pt3dadd(192444.000000,203196.000000,83800.000000,15.001532)}
{pt3dadd(192516.000000,203100.000000,84000.000000,15.001532)}
{pt3dadd(192576.000000,202956.000000,84225.000000,15.001532)}
{pt3dadd(192720.000000,203016.000000,84475.000000,26.202809)}
{pt3dadd(192732.000000,202956.000000,84725.000000,12.701277)}
{pt3dadd(193080.000000,203064.000000,85000.000000,12.701277)}
{pt3dadd(193272.000000,202920.000000,85300.000000,12.701277)}
{pt3dadd(193320.000000,202968.000000,85550.000000,22.576870)}
{pt3dadd(193368.000000,203016.000000,85900.000000,11.375593)}
{pt3dadd(193440.000000,202944.000000,86150.000000,11.375593)}
{pt3dadd(193572.000000,202884.000000,86375.000000,11.375593)}
{pt3dadd(193704.000000,202824.000000,86675.000000,22.576870)}
{pt3dadd(193836.000000,202764.000000,86925.000000,12.701277)}
{pt3dadd(193956.000000,202620.000000,87225.000000,12.701277)}
{pt3dadd(193944.000000,202596.000000,87475.000000,12.701277)}
{pt3dadd(193932.000000,202572.000000,87725.000000,26.202809)}
{pt3dadd(193968.000000,202572.000000,87975.000000,15.001532)}
{pt3dadd(194184.000000,202392.000000,88300.000000,15.001532)}
{pt3dadd(194304.000000,202380.000000,88550.000000,15.001532)}
{pt3dadd(194424.000000,202368.000000,88775.000000,28.503064)}
{pt3dadd(194472.000000,202344.000000,89025.000000,15.001532)}
{pt3dadd(194688.000000,202308.000000,89300.000000,15.001532)}
{pt3dadd(194892.000000,202320.000000,89750.000000,15.001532)}
{pt3dadd(194808.000000,202200.000000,90000.000000,28.503064)}
{pt3dadd(195108.000000,202236.000000,90375.000000,15.001532)}
{pt3dadd(195120.000000,202104.000000,90725.000000,15.001532)}
{pt3dadd(195216.000000,202080.000000,91025.000000,15.001532)}
{pt3dadd(195468.000000,202104.000000,91325.000000,28.503064)}
{pt3dadd(195492.000000,201984.000000,91675.000000,15.001532)}
{pt3dadd(195516.000000,201864.000000,91975.000000,15.001532)}
{pt3dadd(195504.000000,201828.000000,92250.000000,15.001532)}
{pt3dadd(195432.000000,201828.000000,92550.000000,28.503064)}
{pt3dadd(195504.000000,201660.000000,92850.000000,15.001532)}
{pt3dadd(195480.000000,201564.000000,93150.000000,15.001532)}
{pt3dadd(195552.000000,201468.000000,93400.000000,15.001532)}
{pt3dadd(195720.000000,201540.000000,93700.000000,26.202809)}
{pt3dadd(195696.000000,201468.000000,94075.000000,12.701277)}
{pt3dadd(195816.000000,201348.000000,94350.000000,12.701277)}
{pt3dadd(195780.000000,201360.000000,94625.000000,12.701277)}
{pt3dadd(195744.000000,201372.000000,94975.000000,23.902554)}
{pt3dadd(195636.000000,201324.000000,95325.000000,12.701277)}
{pt3dadd(195600.000000,201192.000000,95650.000000,12.701277)}
{pt3dadd(195564.000000,201060.000000,95900.000000,12.701277)}
{pt3dadd(195432.000000,201036.000000,96200.000000,21.985675)}
{pt3dadd(195348.000000,201000.000000,96525.000000,10.784398)}
{pt3dadd(195336.000000,200928.000000,96875.000000,10.784398)}
{pt3dadd(195192.000000,200832.000000,97275.000000,10.784398)}
{pt3dadd(195048.000000,200736.000000,97650.000000,18.471396)}
{pt3dadd(194868.000000,200724.000000,97975.000000,9.186998)}
{pt3dadd(194856.000000,200652.000000,98250.000000,9.186998)}
{pt3dadd(194904.000000,200472.000000,98600.000000,9.186998)}
{pt3dadd(194604.000000,200412.000000,98900.000000,20.388275)}
{pt3dadd(194304.000000,200352.000000,99575.000000,12.701277)}
{pt3dadd(194304.000000,200316.000000,99825.000000,12.701277)}
{pt3dadd(194304.000000,200280.000000,100125.000000,12.701277)}
{pt3dadd(194304.000000,200244.000000,100600.000000,28.963115)}
{pt3dadd(194040.000000,200364.000000,101050.000000,17.761838)}
{pt3dadd(194160.000000,200364.000000,101350.000000,17.761838)}
{pt3dadd(194100.000000,200376.000000,101700.000000,17.761838)}
{pt3dadd(194040.000000,200472.000000,102075.000000,34.023676)}
{pt3dadd(193932.000000,200484.000000,102325.000000,17.761838)}
{pt3dadd(193776.000000,200424.000000,102575.000000,17.761838)}
{pt3dadd(193800.000000,200388.000000,102950.000000,17.761838)}
{pt3dadd(193824.000000,200352.000000,103225.000000,31.263370)}
{pt3dadd(193848.000000,200316.000000,103500.000000,15.001532)}
{pt3dadd(193872.000000,200256.000000,103800.000000,15.001532)}
{pt3dadd(193812.000000,200100.000000,104025.000000,15.001532)}
{pt3dadd(193692.000000,200148.000000,104375.000000,22.688530)}
{pt3dadd(193464.000000,200124.000000,104600.000000,9.186998)}
{pt3dadd(193200.000000,199836.000000,104825.000000,9.186998)}
{pt3dadd(192984.000000,199836.000000,105150.000000,9.186998)}
{pt3dadd(192840.000000,199572.000000,105375.000000,14.433524)}
{pt3dadd(192780.000000,199392.000000,105550.000000,6.746526)}
{pt3dadd(192576.000000,199020.000000,105800.000000,6.746526)}
{pt3dadd(192456.000000,198804.000000,106050.000000,6.746526)}
{pt3dadd(192180.000000,198636.000000,106325.000000,17.947804)}
{pt3dadd(192120.000000,198492.000000,106600.000000,12.701277)}
{pt3dadd(192420.000000,198192.000000,106800.000000,12.701277)}
{pt3dadd(192504.000000,198252.000000,107200.000000,12.701277)}
{pt3dadd(192492.000000,198144.000000,107475.000000,23.902554)}
{pt3dadd(192432.000000,198156.000000,107775.000000,12.701277)}
{pt3dadd(192480.000000,198252.000000,108025.000000,12.701277)}
{pt3dadd(192396.000000,198252.000000,108300.000000,12.701277)}
{pt3dadd(192492.000000,198252.000000,108550.000000,23.902554)}
{pt3dadd(192588.000000,198252.000000,108775.000000,12.701277)}
{pt3dadd(192588.000000,198192.000000,109050.000000,12.701277)}
{pt3dadd(192588.000000,198132.000000,109300.000000,12.701277)}
{pt3dadd(192588.000000,198072.000000,109550.000000,23.902554)}
{pt3dadd(192660.000000,197952.000000,109800.000000,12.701277)}
{pt3dadd(192588.000000,197856.000000,110025.000000,12.701277)}
{pt3dadd(192528.000000,197760.000000,110300.000000,12.701277)}
{pt3dadd(192804.000000,197712.000000,110550.000000,23.902554)}
{pt3dadd(192804.000000,197616.000000,110800.000000,12.701277)}
{pt3dadd(192804.000000,197652.000000,111050.000000,12.701277)}
{pt3dadd(192816.000000,197484.000000,111250.000000,12.701277)}
{pt3dadd(192828.000000,197448.000000,111475.000000,17.023383)}
{pt3dadd(192744.000000,197160.000000,111750.000000,5.822105)}
{pt3dadd(192564.000000,196956.000000,112050.000000,5.822105)}
{pt3dadd(192384.000000,196908.000000,112300.000000,5.822105)}
{pt3dadd(192084.000000,196596.000000,112550.000000,11.068632)}
{pt3dadd(191916.000000,196200.000000,112875.000000,6.746526)}
{pt3dadd(191784.000000,196056.000000,112975.000000,6.746526)}
{pt3dadd(191628.000000,195912.000000,113075.000000,6.746526)}
{pt3dadd(191472.000000,195660.000000,113175.000000,11.993053)}
{pt3dadd(191316.000000,195408.000000,113275.000000,6.746526)}
{pt3dadd(191136.000000,195156.000000,113375.000000,6.746526)}
{pt3dadd(190968.000000,194964.000000,113475.000000,6.746526)}
{pt3dadd(190812.000000,194664.000000,113650.000000,15.279506)}
{pt3dadd(190668.000000,194568.000000,113750.000000,10.032980)}
{pt3dadd(190512.000000,194412.000000,113825.000000,10.032980)}
{pt3dadd(190284.000000,194172.000000,113900.000000,10.032980)}
{pt3dadd(189996.000000,193896.000000,114300.000000,17.719978)}
{pt3dadd(189660.000000,193644.000000,114675.000000,9.186998)}
{pt3dadd(189324.000000,193380.000000,115025.000000,9.186998)}
{pt3dadd(188784.000000,193296.000000,115525.000000,9.186998)}
{pt3dadd(188268.000000,193080.000000,116025.000000,14.433524)}
{pt3dadd(187896.000000,192768.000000,116475.000000,6.746526)}
{pt3dadd(187452.000000,192660.000000,116875.000000,6.746526)}
{pt3dadd(187188.000000,192444.000000,117325.000000,6.746526)}
{pt3dadd(186444.000000,192132.000000,117675.000000,10.298281)}
{pt3dadd(185976.000000,191868.000000,118150.000000,5.051754)}
{pt3dadd(185352.000000,191448.000000,118500.000000,5.051754)}
{pt3dadd(184728.000000,191064.000000,118900.000000,5.051754)}
{pt3dadd(184440.000000,190824.000000,119325.000000,9.373860)}
{pt3dadd(184152.000000,190440.000000,119725.000000,5.822105)}
{pt3dadd(183612.000000,189972.000000,120150.000000,5.822105)}
{pt3dadd(183192.000000,189696.000000,120625.000000,5.822105)}
{pt3dadd(182592.000000,189384.000000,121025.000000,8.089942)}
{pt3dadd(182256.000000,188760.000000,121325.000000,3.767836)}
{pt3dadd(181764.000000,188520.000000,121575.000000,3.767836)}
{pt3dadd(180960.000000,187920.000000,122000.000000,3.767836)}
{pt3dadd(180444.000000,187476.000000,122350.000000,6.677632)}
{pt3dadd(179952.000000,186852.000000,122725.000000,4.409795)}
{pt3dadd(179544.000000,186336.000000,123000.000000,4.409795)}
{pt3dadd(179124.000000,185820.000000,123325.000000,4.409795)}
{pt3dadd(178500.000000,185304.000000,123600.000000,6.784625)}
{pt3dadd(178140.000000,184920.000000,123825.000000,3.874829)}
{pt3dadd(177576.000000,184260.000000,124150.000000,3.874829)}
{pt3dadd(176244.000000,183432.000000,124650.000000,3.874829)}
{pt3dadd(176028.000000,183252.000000,124875.000000,6.784625)}
{pt3dadd(175872.000000,183168.000000,125075.000000,4.409795)}
{pt3dadd(175668.000000,183084.000000,125275.000000,4.409795)}
{pt3dadd(175440.000000,182976.000000,125350.000000,4.409795)}
{pt3dadd(175248.000000,182712.000000,125275.000000,7.319591)}
{pt3dadd(175032.000000,182556.000000,125275.000000,4.409795)}
{pt3dadd(174780.000000,182412.000000,125375.000000,4.409795)}
{pt3dadd(174588.000000,182304.000000,125600.000000,4.409795)}
{pt3dadd(174360.000000,182172.000000,125775.000000,8.731901)}
{pt3dadd(174120.000000,181884.000000,125775.000000,5.822105)}
{pt3dadd(173892.000000,181800.000000,125825.000000,5.822105)}
{pt3dadd(173640.000000,181716.000000,125875.000000,5.822105)}
{pt3dadd(173436.000000,181500.000000,125800.000000,9.373860)}
{pt3dadd(173232.000000,181392.000000,125825.000000,5.051754)}
{pt3dadd(173028.000000,181104.000000,125875.000000,5.051754)}
{pt3dadd(172824.000000,180924.000000,125925.000000,5.051754)}
{pt3dadd(172620.000000,180768.000000,126050.000000,8.603509)}
{pt3dadd(172392.000000,180504.000000,125950.000000,5.051754)}
{pt3dadd(172152.000000,180600.000000,126100.000000,5.051754)}
{pt3dadd(171924.000000,180312.000000,126200.000000,5.051754)}
{pt3dadd(171660.000000,180024.000000,126300.000000,7.961550)}
{pt3dadd(171420.000000,179844.000000,126350.000000,4.409795)}
{pt3dadd(171180.000000,179784.000000,126575.000000,4.409795)}
{pt3dadd(170916.000000,179568.000000,126575.000000,4.409795)}
{pt3dadd(170664.000000,179412.000000,126575.000000,7.319591)}
{pt3dadd(170040.000000,179052.000000,126750.000000,4.409795)}
{pt3dadd(169440.000000,178632.000000,127000.000000,4.409795)}
{pt3dadd(169008.000000,178500.000000,127300.000000,4.409795)}
{pt3dadd(168444.000000,178344.000000,127625.000000,7.961550)}
{pt3dadd(167724.000000,178164.000000,127975.000000,5.051754)}
{pt3dadd(167160.000000,177936.000000,128425.000000,5.051754)}
{pt3dadd(166332.000000,177696.000000,128750.000000,5.051754)}
{pt3dadd(165948.000000,177456.000000,129100.000000,7.961550)}
{pt3dadd(165588.000000,177012.000000,129575.000000,4.409795)}
{pt3dadd(165480.000000,176772.000000,129875.000000,4.409795)}
{pt3dadd(165264.000000,176760.000000,130075.000000,4.409795)}
{pt3dadd(165048.000000,176580.000000,130300.000000,7.319591)}
{pt3dadd(164832.000000,176424.000000,130275.000000,4.409795)}
{pt3dadd(164652.000000,176292.000000,130225.000000,4.409795)}
{pt3dadd(164448.000000,175848.000000,130350.000000,4.409795)}
{pt3dadd(164232.000000,175764.000000,130400.000000,7.961550)}
{pt3dadd(163716.000000,175452.000000,130825.000000,5.051754)}
{pt3dadd(163176.000000,174912.000000,131200.000000,5.051754)}
{pt3dadd(162612.000000,174396.000000,131575.000000,5.051754)}
{pt3dadd(162168.000000,173928.000000,131950.000000,7.961550)}
{pt3dadd(161832.000000,173328.000000,132350.000000,4.409795)}
{pt3dadd(161388.000000,172728.000000,132825.000000,4.409795)}
{pt3dadd(161148.000000,172284.000000,133175.000000,4.409795)}
{pt3dadd(160788.000000,171612.000000,133500.000000,7.961550)}
{pt3dadd(160632.000000,171552.000000,133800.000000,5.051754)}
{pt3dadd(160392.000000,171216.000000,134100.000000,5.051754)}
{pt3dadd(160152.000000,170700.000000,134375.000000,5.051754)}
{pt3dadd(159792.000000,169980.000000,134700.000000,7.961550)}
{pt3dadd(159324.000000,169548.000000,135050.000000,4.409795)}
{pt3dadd(158808.000000,169056.000000,135375.000000,4.409795)}
{pt3dadd(158292.000000,168492.000000,135850.000000,4.409795)}
{pt3dadd(158052.000000,168072.000000,136300.000000,8.731901)}
{pt3dadd(157488.000000,167784.000000,136675.000000,5.822105)}
{pt3dadd(157068.000000,167244.000000,137100.000000,5.822105)}
{pt3dadd(157092.000000,166824.000000,137525.000000,5.822105)}
{pt3dadd(157008.000000,166332.000000,137950.000000,10.846771)}
{pt3dadd(157740.000000,166200.000000,138350.000000,6.524665)}
{pt3dadd(157584.000000,166020.000000,138775.000000,6.524665)}
{pt3dadd(157356.000000,165840.000000,139225.000000,6.524665)}
{pt3dadd(157272.000000,165576.000000,139675.000000,11.771192)}
{pt3dadd(156984.000000,165288.000000,140100.000000,6.746526)}
{pt3dadd(156696.000000,165384.000000,140575.000000,6.746526)}
{pt3dadd(156516.000000,165204.000000,141025.000000,6.746526)}
{pt3dadd(156180.000000,164916.000000,141575.000000,11.068632)}
{pt3dadd(156168.000000,164580.000000,142050.000000,5.822105)}
{pt3dadd(155904.000000,164220.000000,142400.000000,5.822105)}
{pt3dadd(155640.000000,164040.000000,142750.000000,5.822105)}
{pt3dadd(155340.000000,163320.000000,143175.000000,11.068632)}
{pt3dadd(155028.000000,162828.000000,143550.000000,6.746526)}
{pt3dadd(154824.000000,161820.000000,144025.000000,6.746526)}
{pt3dadd(154608.000000,161124.000000,144425.000000,6.746526)}
{pt3dadd(154452.000000,160656.000000,144875.000000,11.993053)}
{pt3dadd(154164.000000,160188.000000,145225.000000,6.746526)}
{pt3dadd(153804.000000,159696.000000,145700.000000,6.746526)}
{pt3dadd(154092.000000,158616.000000,146100.000000,6.746526)}
{pt3dadd(153852.000000,157968.000000,146400.000000,14.433524)}
{pt3dadd(153816.000000,157680.000000,146700.000000,9.186998)}
{pt3dadd(153960.000000,157416.000000,147125.000000,9.186998)}
{pt3dadd(153804.000000,156900.000000,147575.000000,9.186998)}
{pt3dadd(153588.000000,156432.000000,148000.000000,18.471396)}
{pt3dadd(153144.000000,155220.000000,148475.000000,10.784398)}
{pt3dadd(152868.000000,154656.000000,148900.000000,10.784398)}
{pt3dadd(153012.000000,154164.000000,149325.000000,10.784398)}
{pt3dadd(152904.000000,153516.000000,149800.000000,17.140230)}
{pt3dadd(152184.000000,153396.000000,150225.000000,7.855832)}
{pt3dadd(151560.000000,152832.000000,150625.000000,7.855832)}
{pt3dadd(150804.000000,152592.000000,151150.000000,7.855832)}
{pt3dadd(150384.000000,151944.000000,151700.000000,19.057109)}
{pt3dadd(150276.000000,151476.000000,152325.000000,12.701277)}
{pt3dadd(149988.000000,151344.000000,153025.000000,12.701277)}
{pt3dadd(149988.000000,151092.000000,153325.000000,12.701277)}
{pt3dadd(149988.000000,150816.000000,153625.000000,25.650747)}
{pt3dadd(149988.000000,150552.000000,153925.000000,14.449470)}
{pt3dadd(149976.000000,150276.000000,154225.000000,14.449470)}
{pt3dadd(150072.000000,149988.000000,154150.000000,14.449470)}
{pt3dadd(150060.000000,149736.000000,154325.000000,27.398940)}
{pt3dadd(150048.000000,149472.000000,154500.000000,14.449470)}
{pt3dadd(150036.000000,149196.000000,154675.000000,14.449470)}
{pt3dadd(150084.000000,148932.000000,154675.000000,14.449470)}
{pt3dadd(150156.000000,148656.000000,154950.000000,25.650747)}
{pt3dadd(150108.000000,148392.000000,154850.000000,12.701277)}
{pt3dadd(150096.000000,148140.000000,155150.000000,12.701277)}
{pt3dadd(150084.000000,147876.000000,154975.000000,12.701277)}
{pt3dadd(149976.000000,147648.000000,155275.000000,21.985675)}
{pt3dadd(149844.000000,147396.000000,155200.000000,10.784398)}
{pt3dadd(149832.000000,147168.000000,155375.000000,10.784398)}
{pt3dadd(149952.000000,146928.000000,155625.000000,10.784398)}
{pt3dadd(149712.000000,146664.000000,155750.000000,20.068796)}
{pt3dadd(149556.000000,146400.000000,155775.000000,10.784398)}
{pt3dadd(149496.000000,145980.000000,156125.000000,10.784398)}
{pt3dadd(149640.000000,145080.000000,156475.000000,10.784398)}
{pt3dadd(149940.000000,144708.000000,156825.000000,21.985675)}
{pt3dadd(150216.000000,144624.000000,157200.000000,12.701277)}
{pt3dadd(150156.000000,144492.000000,157575.000000,12.701277)}
{pt3dadd(150408.000000,144156.000000,157925.000000,12.701277)}
{pt3dadd(150756.000000,143916.000000,158200.000000,23.902554)}
{pt3dadd(150516.000000,143904.000000,158500.000000,12.701277)}
{pt3dadd(150300.000000,143928.000000,158725.000000,12.701277)}
{pt3dadd(150264.000000,143124.000000,159025.000000,12.701277)}
{pt3dadd(150240.000000,142992.000000,159325.000000,21.985675)}
{pt3dadd(150204.000000,142728.000000,159650.000000,10.784398)}
{pt3dadd(150300.000000,142032.000000,160025.000000,10.784398)}
{pt3dadd(150552.000000,141516.000000,160350.000000,10.784398)}
{pt3dadd(151164.000000,141048.000000,160650.000000,21.985675)}
{pt3dadd(151440.000000,140400.000000,161025.000000,12.701277)}
{pt3dadd(151704.000000,139752.000000,161400.000000,12.701277)}
{pt3dadd(152076.000000,139308.000000,161750.000000,12.701277)}
{pt3dadd(152328.000000,138900.000000,162100.000000,26.202809)}
{pt3dadd(152700.000000,138624.000000,162475.000000,15.001532)}
{pt3dadd(153024.000000,138372.000000,162825.000000,15.001532)}
{pt3dadd(153336.000000,138108.000000,163325.000000,15.001532)}
{pt3dadd(153456.000000,137460.000000,163825.000000,31.263370)}
{pt3dadd(153912.000000,137100.000000,164375.000000,17.761838)}
{pt3dadd(154344.000000,136632.000000,164875.000000,17.761838)}
{pt3dadd(154692.000000,136116.000000,165350.000000,17.761838)}
{pt3dadd(154992.000000,135732.000000,165850.000000,28.963115)}
{pt3dadd(154968.000000,135780.000000,166275.000000,12.701277)}
{pt3dadd(155268.000000,134976.000000,166850.000000,12.701277)}
{pt3dadd(155496.000000,135072.000000,167350.000000,12.701277)}
{pt3dadd(155640.000000,135264.000000,167675.000000,28.963115)}
{pt3dadd(155628.000000,135228.000000,167950.000000,17.661838)}
{pt3dadd(155676.000000,135300.000000,168300.000000,17.661838)}
{pt3dadd(155724.000000,135372.000000,168625.000000,17.661838)}
{pt3dadd(155424.000000,135276.000000,168925.000000,36.441076)}
{pt3dadd(155232.000000,135036.000000,169275.000000,20.179238)}
{pt3dadd(155160.000000,135012.000000,169675.000000,20.279238)}
{pt3dadd(154968.000000,134964.000000,169950.000000,20.279238)}
{pt3dadd(154872.000000,134892.000000,170325.000000,39.853443)}
{pt3dadd(154776.000000,134820.000000,170650.000000,21.074205)}
{pt3dadd(154680.000000,134748.000000,171075.000000,21.074205)}
{pt3dadd(154452.000000,134784.000000,171575.000000,40.648410)}
{pt3dadd(154284.000000,134472.000000,172000.000000,56.910248)}
{pt3dadd(154164.000000,134400.000000,172400.000000,61.226738)}
{pt3dadd(154200.000000,133920.000000,172600.000000,82.809190)}

{create adhoc14}
{access adhoc14}
{connect adhoc14(1), adhoc13(0)}
{nseg = 1}
{strdef color color = "White"}
{pt3dclear()}
{pt3dadd(154200.000000,133920.000000,172600.000000,82.809190)}
{pt3dadd(153648.000000,133896.000000,173000.000000,51.105617)}
{pt3dadd(153072.000000,133884.000000,173375.000000,31.263370)}
{pt3dadd(152712.000000,133992.000000,173500.000000,28.503064)}
{pt3dadd(152400.000000,133968.000000,173475.000000,26.202809)}
{pt3dadd(152076.000000,133896.000000,174425.000000,42.671349)}
{pt3dadd(151812.000000,133716.000000,174700.000000,57.506386)}

{create adhoc15}
{access adhoc15}
{connect adhoc15(1), adhoc14(0)}
{nseg = 1}
{strdef color color = "White"}
{pt3dclear()}
{pt3dadd(151812.000000,133716.000000,174700.000000,57.506386)}
{pt3dadd(151500.000000,133416.000000,175400.000000,79.496840)}

{create adhoc16}
{access adhoc16}
{connect adhoc16(1), adhoc15(0)}
{nseg = 1}
{strdef color color = "White"}
{pt3dclear()}
{pt3dadd(151500.000000,133416.000000,175400.000000,79.496840)}
{pt3dadd(150996.000000,133248.000000,175900.000000,60.122622)}
{pt3dadd(151032.000000,133080.000000,176250.000000,36.673573)}
{pt3dadd(150756.000000,133260.000000,176750.000000,37.336043)}
{pt3dadd(150480.000000,133572.000000,177125.000000,17.761838)}
{pt3dadd(150096.000000,133752.000000,177550.000000,17.761838)}
{pt3dadd(149664.000000,133932.000000,178025.000000,31.528577)}
{pt3dadd(149340.000000,134040.000000,178275.000000,45.030109)}
{pt3dadd(149148.000000,134196.000000,178325.000000,46.947118)}
{pt3dadd(148860.000000,134412.000000,178850.000000,69.007660)}

{create adhoc17}
{access adhoc17}
{connect adhoc17(1), adhoc16(0)}
{nseg = 1}
{strdef color color = "White"}
{pt3dclear()}
{pt3dadd(148860.000000,134412.000000,178850.000000,69.007660)}
{pt3dadd(148572.000000,134340.000000,179025.000000,46.505107)}
{pt3dadd(148296.000000,134352.000000,178950.000000,28.503064)}
{pt3dadd(148020.000000,134304.000000,179225.000000,28.503064)}
{pt3dadd(147744.000000,134232.000000,179525.000000,15.001532)}
{pt3dadd(147492.000000,134340.000000,179675.000000,15.001532)}
{pt3dadd(147264.000000,134448.000000,179825.000000,15.001532)}
{pt3dadd(147000.000000,134556.000000,179975.000000,29.964922)}
{pt3dadd(146928.000000,134664.000000,180300.000000,16.463390)}
{pt3dadd(146628.000000,134520.000000,180650.000000,16.463390)}
{pt3dadd(146400.000000,134592.000000,181100.000000,16.463390)}
{pt3dadd(146112.000000,134700.000000,181325.000000,27.664667)}
{pt3dadd(145848.000000,134676.000000,181450.000000,12.701277)}
{pt3dadd(145620.000000,134652.000000,181575.000000,12.701277)}
{pt3dadd(145344.000000,134736.000000,181925.000000,12.701277)}
{pt3dadd(145092.000000,134952.000000,181925.000000,19.057109)}
{pt3dadd(144804.000000,134760.000000,182025.000000,7.855832)}
{pt3dadd(144552.000000,134916.000000,181975.000000,7.855832)}
{pt3dadd(144288.000000,135228.000000,181800.000000,7.855832)}
{pt3dadd(144096.000000,135132.000000,181675.000000,13.102358)}
{pt3dadd(143928.000000,135012.000000,181725.000000,6.746526)}
{pt3dadd(143736.000000,135096.000000,181775.000000,6.746526)}
{pt3dadd(143496.000000,135108.000000,181750.000000,6.746526)}
{pt3dadd(143268.000000,135012.000000,181700.000000,11.993053)}
{pt3dadd(143088.000000,134916.000000,181650.000000,6.746526)}
{pt3dadd(142896.000000,134820.000000,181600.000000,6.746526)}
{pt3dadd(142716.000000,134856.000000,181700.000000,12.836125)}
{pt3dadd(142464.000000,134808.000000,181775.000000,19.191957)}
{pt3dadd(142212.000000,134736.000000,181850.000000,22.242384)}
{pt3dadd(141948.000000,134544.000000,181825.000000,33.279160)}

{create adhoc18}
{access adhoc18}
{connect adhoc18(1), adhoc17(0)}
{nseg = 1}
{strdef color color = "White"}
{pt3dclear()}
{pt3dadd(141948.000000,134544.000000,181825.000000,33.279160)}
{pt3dadd(141696.000000,136140.000000,181850.000000,20.837264)}
{pt3dadd(141468.000000,136524.000000,182050.000000,13.102358)}
{pt3dadd(141204.000000,136428.000000,181975.000000,14.433524)}
{pt3dadd(140988.000000,136608.000000,181900.000000,9.186998)}
{pt3dadd(140748.000000,136620.000000,182000.000000,9.186998)}
{pt3dadd(140484.000000,136704.000000,182000.000000,9.186998)}
{pt3dadd(140232.000000,136836.000000,181600.000000,22.688530)}
{pt3dadd(140448.000000,137136.000000,181550.000000,15.001532)}
{pt3dadd(138672.000000,137808.000000,179375.000000,15.001532)}
{pt3dadd(138276.000000,138180.000000,179050.000000,15.001532)}
{pt3dadd(138336.000000,138408.000000,179375.000000,26.202809)}
{pt3dadd(137940.000000,138444.000000,178550.000000,12.701277)}
{pt3dadd(137868.000000,138276.000000,177950.000000,12.701277)}
{pt3dadd(137724.000000,137844.000000,177450.000000,12.701277)}
{pt3dadd(137220.000000,137388.000000,176950.000000,20.388275)}
{pt3dadd(136512.000000,136884.000000,176550.000000,9.186998)}
{pt3dadd(136188.000000,136176.000000,176100.000000,9.186998)}
{pt3dadd(135540.000000,136152.000000,175650.000000,9.186998)}
{pt3dadd(135516.000000,136008.000000,175325.000000,11.561827)}
{pt3dadd(135372.000000,135660.000000,174725.000000,3.874829)}
{pt3dadd(136752.000000,135432.000000,174275.000000,3.874829)}
{pt3dadd(136632.000000,135324.000000,174000.000000,3.874829)}
{pt3dadd(136260.000000,134916.000000,174650.000000,9.964428)}
{pt3dadd(136188.000000,134484.000000,174900.000000,7.589598)}
{pt3dadd(136164.000000,134160.000000,174850.000000,7.589598)}
{pt3dadd(136092.000000,133836.000000,175300.000000,7.589598)}
{pt3dadd(136224.000000,133536.000000,175400.000000,9.964428)}
{pt3dadd(136284.000000,133200.000000,175650.000000,6.249659)}
{pt3dadd(136236.000000,133044.000000,175800.000000,7.024613)}
{pt3dadd(136368.000000,132852.000000,175975.000000,10.707688)}
{pt3dadd(136380.000000,132564.000000,175875.000000,5.374770)}

{create adhoc19}
{access adhoc19}
{connect adhoc19(1), adhoc17(0)}
{nseg = 1}
{strdef color color = "White"}
{pt3dclear()}
{pt3dadd(141948.000000,134544.000000,181825.000000,33.279160)}
{pt3dadd(141612.000000,134064.000000,181750.000000,21.816411)}
{pt3dadd(141372.000000,134076.000000,181800.000000,13.689847)}
{pt3dadd(141120.000000,133908.000000,181825.000000,10.731699)}
{pt3dadd(140856.000000,133656.000000,181400.000000,7.272514)}
{pt3dadd(140544.000000,133632.000000,181300.000000,11.120856)}
{pt3dadd(140352.000000,133464.000000,181300.000000,13.374147)}

{create adhoc20}
{access adhoc20}
{connect adhoc20(1), adhoc16(0)}
{nseg = 1}
{strdef color color = "White"}
{pt3dclear()}
{pt3dadd(148860.000000,134412.000000,178850.000000,69.007660)}
{pt3dadd(149076.000000,136560.000000,180725.000000,34.595607)}
{pt3dadd(149316.000000,136980.000000,180975.000000,21.357364)}
{pt3dadd(149604.000000,137244.000000,181125.000000,13.102358)}
{pt3dadd(149796.000000,137664.000000,181200.000000,6.746526)}
{pt3dadd(150048.000000,138084.000000,181300.000000,6.746526)}
{pt3dadd(150300.000000,138060.000000,181525.000000,6.746526)}
{pt3dadd(150516.000000,138396.000000,181525.000000,15.647548)}
{pt3dadd(150792.000000,138348.000000,181675.000000,10.401022)}
{pt3dadd(151068.000000,138432.000000,181875.000000,10.401022)}
{pt3dadd(151296.000000,138288.000000,182350.000000,19.685420)}
{pt3dadd(151572.000000,138360.000000,182275.000000,219.385420)}
{pt3dadd(151764.000000,138420.000000,182300.000000,349.807330)}
{pt3dadd(152004.000000,138276.000000,182425.000000,1000.000000)}

{create adhoc21}
{access adhoc21}
{connect adhoc21(1), adhoc15(0)}
{nseg = 1}
{strdef color color = "White"}
{pt3dclear()}
{pt3dadd(151500.000000,133416.000000,175400.000000,79.496840)}
{pt3dadd(151356.000000,135468.000000,173925.000000,31.456996)}
{pt3dadd(151152.000000,135828.000000,173950.000000,19.474197)}
{pt3dadd(150912.000000,136188.000000,174025.000000,7.426584)}
{pt3dadd(150660.000000,136656.000000,173925.000000,7.426584)}
{pt3dadd(150396.000000,136464.000000,174025.000000,9.355608)}
{pt3dadd(150132.000000,136524.000000,174225.000000,14.592681)}
{pt3dadd(149844.000000,136536.000000,174400.000000,11.145123)}

{create adhoc22}
{access adhoc22}
{connect adhoc22(1), adhoc14(0)}
{nseg = 1}
{strdef color color = "White"}
{pt3dclear()}
{pt3dadd(151812.000000,133716.000000,174700.000000,57.506386)}
{pt3dadd(151656.000000,133644.000000,172800.000000,28.913006)}
{pt3dadd(151452.000000,133596.000000,172675.000000,20.322633)}
{pt3dadd(151224.000000,133728.000000,172425.000000,9.717151)}
{pt3dadd(151068.000000,133560.000000,172525.000000,6.451041)}
{pt3dadd(150840.000000,133896.000000,172300.000000,4.478975)}

{create adhoc23}
{access adhoc23}
{connect adhoc23(1), adhoc13(0)}
{nseg = 1}
{strdef color color = "White"}
{pt3dclear()}
{pt3dadd(154200.000000,133920.000000,172600.000000,82.809190)}
{pt3dadd(156924.000000,133260.000000,172825.000000,35.776153)}
{pt3dadd(157212.000000,133368.000000,173025.000000,11.145123)}
