# Supplementary material for: Full reconstruction of large lobula plate tangential cells in Drosophila from a 3D EM dataset
Source: PLoS One. 2018 Nov 28;13(11):e0207828. doi: 10.1371/journal.pone.0207828 (PMC6261601; doi:10.1371/journal.pone.0207828)
Supplement: S1 Dataset — (ZIP) [file pone.0207828.s001.zip › Diameter hoc/VS_VSL_preliminary/VSlike1_3skels_ck.001_completed.hoc0003.hoc]

/* created with convertKnossosNmlToHoc.m */

{create adhoc1}
{access adhoc1}
{nseg = 1}
{strdef color color = "White"}
{pt3dclear()}
{pt3dadd(150888.000000,131280.000000,174575.000000,7.739669)}
{pt3dadd(150816.000000,131496.000000,174825.000000,18.041461)}
{pt3dadd(151764.000000,133428.000000,174550.000000,39.934990)}

{create adhoc2}
{access adhoc2}
{connect adhoc2(1), adhoc1(0)}
{nseg = 1}
{strdef color color = "White"}
{pt3dclear()}
{pt3dadd(151764.000000,133428.000000,174550.000000,39.934990)}
{pt3dadd(153048.000000,133716.000000,173900.000000,47.921990)}

{create adhoc3}
{access adhoc3}
{connect adhoc3(1), adhoc2(0)}
{nseg = 1}
{strdef color color = "White"}
{pt3dclear()}
{pt3dadd(153048.000000,133716.000000,173900.000000,47.921990)}
{pt3dadd(150756.000000,136500.000000,173850.000000,22.893587)}
{pt3dadd(150600.000000,136752.000000,174000.000000,14.336152)}
{pt3dadd(150684.000000,137100.000000,173925.000000,6.299688)}
{pt3dadd(150552.000000,137340.000000,173975.000000,2.747934)}
{pt3dadd(150444.000000,137592.000000,173975.000000,2.747934)}
{pt3dadd(150504.000000,137856.000000,173975.000000,2.747934)}
{pt3dadd(150516.000000,138108.000000,173925.000000,5.122763)}
{pt3dadd(150636.000000,138372.000000,173925.000000,3.874829)}
{pt3dadd(150504.000000,138732.000000,173850.000000,3.874829)}
{pt3dadd(150744.000000,139020.000000,173925.000000,3.874829)}
{pt3dadd(150984.000000,139248.000000,173825.000000,5.122763)}
{pt3dadd(151152.000000,139476.000000,173750.000000,2.747934)}
{pt3dadd(152532.000000,140640.000000,173325.000000,2.747934)}
{pt3dadd(153912.000000,141336.000000,173350.000000,2.747934)}
{pt3dadd(154212.000000,141636.000000,173500.000000,5.657729)}
{pt3dadd(154668.000000,141912.000000,173525.000000,4.409795)}
{pt3dadd(154536.000000,142092.000000,173575.000000,4.409795)}
{pt3dadd(155112.000000,142332.000000,173550.000000,4.409795)}
{pt3dadd(155508.000000,142620.000000,173275.000000,5.184749)}
{pt3dadd(155736.000000,142548.000000,173525.000000,2.274954)}
{pt3dadd(155940.000000,142548.000000,173500.000000,2.274954)}
{pt3dadd(157476.000000,143760.000000,172550.000000,2.274954)}
{pt3dadd(157704.000000,144564.000000,171975.000000,4.649783)}
{pt3dadd(157968.000000,144948.000000,171425.000000,4.864774)}
{pt3dadd(157932.000000,145152.000000,170875.000000,7.107957)}
{pt3dadd(158136.000000,145392.000000,170475.000000,6.449724)}

{create adhoc4}
{access adhoc4}
{connect adhoc4(1), adhoc2(0)}
{nseg = 1}
{strdef color color = "White"}
{pt3dclear()}
{pt3dadd(153048.000000,133716.000000,173900.000000,47.921990)}
{pt3dadd(151392.000000,133632.000000,172500.000000,25.781705)}
{pt3dadd(151332.000000,133500.000000,172175.000000,11.300700)}
{pt3dadd(151296.000000,133512.000000,171975.000000,4.478975)}

{create adhoc5}
{access adhoc5}
{connect adhoc5(1), adhoc2(0)}
{nseg = 1}
{strdef color color = "White"}
{pt3dclear()}
{pt3dadd(153048.000000,133716.000000,173900.000000,47.921990)}
{pt3dadd(153396.000000,133692.000000,173575.000000,51.116789)}
{pt3dadd(153684.000000,133860.000000,172775.000000,57.506386)}

{create adhoc6}
{access adhoc6}
{connect adhoc6(1), adhoc5(0)}
{nseg = 1}
{strdef color color = "White"}
{pt3dclear()}
{pt3dadd(153684.000000,133860.000000,172775.000000,57.506386)}
{pt3dadd(156684.000000,133320.000000,172625.000000,23.383836)}
{pt3dadd(156948.000000,133296.000000,172825.000000,15.620247)}
{pt3dadd(157128.000000,133356.000000,172900.000000,5.193923)}
{pt3dadd(157284.000000,133332.000000,173025.000000,4.441498)}
{pt3dadd(157392.000000,133296.000000,173050.000000,5.374770)}

{create adhoc7}
{access adhoc7}
{connect adhoc7(1), adhoc5(0)}
{nseg = 1}
{strdef color color = "White"}
{pt3dclear()}
{pt3dadd(153684.000000,133860.000000,172775.000000,57.506386)}
{pt3dadd(153924.000000,133896.000000,172425.000000,38.837591)}
{pt3dadd(154248.000000,134256.000000,172125.000000,23.902554)}
{pt3dadd(154452.000000,134424.000000,171475.000000,26.202809)}
{pt3dadd(154884.000000,134592.000000,170550.000000,15.001532)}
{pt3dadd(155244.000000,134904.000000,169550.000000,15.001532)}
{pt3dadd(155592.000000,135084.000000,168800.000000,15.001532)}
{pt3dadd(155832.000000,135072.000000,168225.000000,24.285930)}
{pt3dadd(155448.000000,135072.000000,167450.000000,10.784398)}
{pt3dadd(155208.000000,134796.000000,166750.000000,10.784398)}
{pt3dadd(155148.000000,135432.000000,166025.000000,10.784398)}
{pt3dadd(155088.000000,135696.000000,165600.000000,21.985675)}
{pt3dadd(154728.000000,136080.000000,165000.000000,12.701277)}
{pt3dadd(154392.000000,136464.000000,164450.000000,12.701277)}
{pt3dadd(153900.000000,136860.000000,163975.000000,12.701277)}
{pt3dadd(153672.000000,137304.000000,163450.000000,26.202809)}
{pt3dadd(153312.000000,137736.000000,162900.000000,15.001532)}
{pt3dadd(153012.000000,138168.000000,162575.000000,15.001532)}
{pt3dadd(152892.000000,138636.000000,162450.000000,15.001532)}
{pt3dadd(152652.000000,139140.000000,162200.000000,24.285930)}
{pt3dadd(152460.000000,139560.000000,162025.000000,10.784398)}
{pt3dadd(152292.000000,139944.000000,161750.000000,10.784398)}
{pt3dadd(151896.000000,140292.000000,161400.000000,10.784398)}
{pt3dadd(151356.000000,140796.000000,160675.000000,20.068796)}
{pt3dadd(150468.000000,142248.000000,159950.000000,10.784398)}
{pt3dadd(150156.000000,143160.000000,159150.000000,10.784398)}
{pt3dadd(150624.000000,143856.000000,158500.000000,10.784398)}
{pt3dadd(150360.000000,144324.000000,157425.000000,20.068796)}
{pt3dadd(149520.000000,144936.000000,156350.000000,10.784398)}
{pt3dadd(149664.000000,145284.000000,156150.000000,10.784398)}
{pt3dadd(149532.000000,145608.000000,155850.000000,10.784398)}
{pt3dadd(149532.000000,145956.000000,155875.000000,20.068796)}
{pt3dadd(149604.000000,146292.000000,155700.000000,10.784398)}
{pt3dadd(149772.000000,146616.000000,155600.000000,10.784398)}
{pt3dadd(149868.000000,146916.000000,155550.000000,10.784398)}
{pt3dadd(149940.000000,147252.000000,155300.000000,21.083975)}
{pt3dadd(150108.000000,147696.000000,155125.000000,11.799577)}
{pt3dadd(150216.000000,148116.000000,155025.000000,11.799577)}
{pt3dadd(150204.000000,148608.000000,155025.000000,11.799577)}
{pt3dadd(150084.000000,148944.000000,154725.000000,20.700598)}
{pt3dadd(150072.000000,149268.000000,154600.000000,10.401022)}
{pt3dadd(149976.000000,149568.000000,154400.000000,10.401022)}
{pt3dadd(149916.000000,149928.000000,154275.000000,10.401022)}
{pt3dadd(149988.000000,150324.000000,154075.000000,19.685420)}
{pt3dadd(150084.000000,150648.000000,153775.000000,10.784398)}
{pt3dadd(150072.000000,150972.000000,153200.000000,10.784398)}
{pt3dadd(150180.000000,151272.000000,152850.000000,10.784398)}
{pt3dadd(150204.000000,151512.000000,152650.000000,16.030924)}
{pt3dadd(150288.000000,151788.000000,151975.000000,6.746526)}
{pt3dadd(150468.000000,152292.000000,151550.000000,6.746526)}
{pt3dadd(150816.000000,152268.000000,151225.000000,6.746526)}
{pt3dadd(151224.000000,152364.000000,151025.000000,11.993053)}
{pt3dadd(151548.000000,152796.000000,150725.000000,6.746526)}
{pt3dadd(151812.000000,153048.000000,150550.000000,6.746526)}
{pt3dadd(152136.000000,153084.000000,150375.000000,6.746526)}
{pt3dadd(152532.000000,153408.000000,150125.000000,14.433524)}
{pt3dadd(152892.000000,153852.000000,149800.000000,9.186998)}
{pt3dadd(152952.000000,154260.000000,149525.000000,9.186998)}
{pt3dadd(152940.000000,154764.000000,149225.000000,9.186998)}
{pt3dadd(153048.000000,155172.000000,148875.000000,16.873996)}
{pt3dadd(153120.000000,155544.000000,148675.000000,9.186998)}
{pt3dadd(153180.000000,155808.000000,148550.000000,9.186998)}
{pt3dadd(153324.000000,156108.000000,148200.000000,9.186998)}
{pt3dadd(153360.000000,156360.000000,148100.000000,16.873996)}
{pt3dadd(153528.000000,156684.000000,147950.000000,9.186998)}
{pt3dadd(153744.000000,157008.000000,147550.000000,9.186998)}
{pt3dadd(153876.000000,157368.000000,147275.000000,9.186998)}
{pt3dadd(153828.000000,157740.000000,146875.000000,15.542830)}
{pt3dadd(153924.000000,157956.000000,146525.000000,7.855832)}
{pt3dadd(154020.000000,158232.000000,146250.000000,7.855832)}
{pt3dadd(154008.000000,158460.000000,145975.000000,7.855832)}
{pt3dadd(153996.000000,158736.000000,145800.000000,15.542830)}
{pt3dadd(154140.000000,159084.000000,145700.000000,9.186998)}
{pt3dadd(154212.000000,159432.000000,145525.000000,9.186998)}
{pt3dadd(154152.000000,159720.000000,145325.000000,9.186998)}
{pt3dadd(154260.000000,159996.000000,145275.000000,15.542830)}
{pt3dadd(154320.000000,160980.000000,144775.000000,7.855832)}
{pt3dadd(154380.000000,161208.000000,144550.000000,7.855832)}
{pt3dadd(154992.000000,162420.000000,143900.000000,7.855832)}
{pt3dadd(155388.000000,163164.000000,143375.000000,13.102358)}
{pt3dadd(155712.000000,163812.000000,142825.000000,6.746526)}
{pt3dadd(156120.000000,164472.000000,142200.000000,6.638526)}
{pt3dadd(156144.000000,164784.000000,141725.000000,6.638526)}
{pt3dadd(156456.000000,165024.000000,141200.000000,14.325524)}
{pt3dadd(156480.000000,164832.000000,140725.000000,9.078998)}
{pt3dadd(156684.000000,165000.000000,140300.000000,9.078998)}
{pt3dadd(157080.000000,165432.000000,139725.000000,9.186998)}
{pt3dadd(157404.000000,165588.000000,139200.000000,14.211664)}
{pt3dadd(157644.000000,165756.000000,138725.000000,6.524666)}
{pt3dadd(157296.000000,166308.000000,138125.000000,6.524666)}
{pt3dadd(157032.000000,166848.000000,137500.000000,6.524666)}
{pt3dadd(157392.000000,167508.000000,136850.000000,10.846771)}
{pt3dadd(158004.000000,167940.000000,136225.000000,5.822105)}
{pt3dadd(158232.000000,168228.000000,135850.000000,5.822105)}
{pt3dadd(158916.000000,169176.000000,135200.000000,5.822105)}
{pt3dadd(159744.000000,169884.000000,134875.000000,10.144211)}
{pt3dadd(160152.000000,170568.000000,134325.000000,5.822105)}
{pt3dadd(160512.000000,171336.000000,133825.000000,5.822105)}
{pt3dadd(161076.000000,172248.000000,133300.000000,5.822105)}
{pt3dadd(161436.000000,172620.000000,132775.000000,10.144211)}
{pt3dadd(162120.000000,173328.000000,132275.000000,5.822105)}
{pt3dadd(162528.000000,174168.000000,131750.000000,5.822105)}
{pt3dadd(163176.000000,174840.000000,131200.000000,5.822105)}
{pt3dadd(164088.000000,175560.000000,130675.000000,10.144211)}
{pt3dadd(164664.000000,176076.000000,130225.000000,5.822105)}
{pt3dadd(165744.000000,176892.000000,129600.000000,5.822105)}
{pt3dadd(166212.000000,177264.000000,129000.000000,5.822105)}
{pt3dadd(166428.000000,177672.000000,128875.000000,10.144211)}
{pt3dadd(166692.000000,177588.000000,128775.000000,5.822105)}
{pt3dadd(166908.000000,177528.000000,128575.000000,5.822105)}
{pt3dadd(167208.000000,177660.000000,128450.000000,5.822105)}
{pt3dadd(167556.000000,177792.000000,128075.000000,11.068632)}
{pt3dadd(167868.000000,178008.000000,127900.000000,6.746526)}
{pt3dadd(168240.000000,178152.000000,127525.000000,6.746526)}
{pt3dadd(168456.000000,178104.000000,127500.000000,6.746526)}
{pt3dadd(168780.000000,178248.000000,127375.000000,9.656322)}
{pt3dadd(169188.000000,178392.000000,127225.000000,4.409795)}
{pt3dadd(169524.000000,178608.000000,127075.000000,4.409795)}
{pt3dadd(169836.000000,178752.000000,126925.000000,4.409795)}
{pt3dadd(170172.000000,178932.000000,126800.000000,7.961550)}
{pt3dadd(170556.000000,179244.000000,126675.000000,5.051754)}
{pt3dadd(170880.000000,179640.000000,126575.000000,5.051754)}
{pt3dadd(171228.000000,179640.000000,126325.000000,5.051754)}
{pt3dadd(171540.000000,179856.000000,126275.000000,7.961550)}
{pt3dadd(171780.000000,180000.000000,126050.000000,4.409795)}
{pt3dadd(172092.000000,180204.000000,125950.000000,4.409795)}
{pt3dadd(172416.000000,180552.000000,125900.000000,4.409795)}
{pt3dadd(172716.000000,180864.000000,125900.000000,7.961550)}
{pt3dadd(173052.000000,181224.000000,125850.000000,5.051754)}
{pt3dadd(173328.000000,181428.000000,125950.000000,5.051754)}
{pt3dadd(173664.000000,181596.000000,125850.000000,5.051754)}
{pt3dadd(173904.000000,181800.000000,125850.000000,8.603509)}
{pt3dadd(174144.000000,181932.000000,125725.000000,5.051754)}
{pt3dadd(174516.000000,182340.000000,125600.000000,5.051754)}
{pt3dadd(174852.000000,182448.000000,125550.000000,5.051754)}
{pt3dadd(175104.000000,182616.000000,125350.000000,6.980779)}
{pt3dadd(175452.000000,182832.000000,125225.000000,3.429025)}
{pt3dadd(175824.000000,182748.000000,125050.000000,3.429025)}
{pt3dadd(176184.000000,183096.000000,124725.000000,3.429025)}
{pt3dadd(176580.000000,183420.000000,124525.000000,5.358049)}
{pt3dadd(176904.000000,183516.000000,124450.000000,3.429025)}
{pt3dadd(177240.000000,183756.000000,124150.000000,3.429025)}
{pt3dadd(177576.000000,184200.000000,123975.000000,3.429025)}
{pt3dadd(177780.000000,184368.000000,123950.000000,5.803854)}
{pt3dadd(177996.000000,184740.000000,123775.000000,3.874829)}
{pt3dadd(178284.000000,185028.000000,123675.000000,3.874829)}
{pt3dadd(178524.000000,185436.000000,123625.000000,3.874829)}
{pt3dadd(178872.000000,185652.000000,123500.000000,6.784625)}
{pt3dadd(179184.000000,185796.000000,123225.000000,4.409795)}
{pt3dadd(179520.000000,186120.000000,123100.000000,4.409795)}
{pt3dadd(179772.000000,186336.000000,122875.000000,4.409795)}
{pt3dadd(180096.000000,186876.000000,122600.000000,6.784625)}
{pt3dadd(180336.000000,187128.000000,122400.000000,3.874829)}
{pt3dadd(180612.000000,187524.000000,122200.000000,3.874829)}
{pt3dadd(180900.000000,187740.000000,122000.000000,3.874829)}
{pt3dadd(181152.000000,187908.000000,121850.000000,5.803854)}
{pt3dadd(181428.000000,188196.000000,121650.000000,3.429025)}
{pt3dadd(181656.000000,188364.000000,121575.000000,3.429025)}
{pt3dadd(182028.000000,188676.000000,121425.000000,3.429025)}
{pt3dadd(182376.000000,189000.000000,121175.000000,6.980779)}
{pt3dadd(182676.000000,189060.000000,121050.000000,5.051754)}
{pt3dadd(182916.000000,189336.000000,120800.000000,5.051754)}
{pt3dadd(183252.000000,189504.000000,120525.000000,5.051754)}
{pt3dadd(183588.000000,189900.000000,120200.000000,8.449439)}
{pt3dadd(183828.000000,190140.000000,120000.000000,4.897684)}
{pt3dadd(184056.000000,190356.000000,119725.000000,4.897684)}
{pt3dadd(184392.000000,190608.000000,119400.000000,4.897684)}
{pt3dadd(184680.000000,190824.000000,119025.000000,8.295369)}
{pt3dadd(185004.000000,191004.000000,118750.000000,4.897684)}
{pt3dadd(185292.000000,191172.000000,118600.000000,4.897684)}
{pt3dadd(185580.000000,191340.000000,118400.000000,4.897684)}
{pt3dadd(185916.000000,191508.000000,118175.000000,9.219790)}
{pt3dadd(186216.000000,191748.000000,117900.000000,5.822105)}
{pt3dadd(186504.000000,191820.000000,117700.000000,5.822105)}
{pt3dadd(186792.000000,192096.000000,117400.000000,5.822105)}
{pt3dadd(187104.000000,192264.000000,117175.000000,12.177937)}
{pt3dadd(187392.000000,192372.000000,117050.000000,7.855832)}
{pt3dadd(187680.000000,192624.000000,116825.000000,7.855832)}
{pt3dadd(187944.000000,192720.000000,116475.000000,7.855832)}
{pt3dadd(188208.000000,193032.000000,116075.000000,14.211664)}
{pt3dadd(188508.000000,193068.000000,115800.000000,7.855832)}
{pt3dadd(188844.000000,193272.000000,115500.000000,7.855832)}
{pt3dadd(189096.000000,193776.000000,114900.000000,7.855832)}
{pt3dadd(189600.000000,193968.000000,114425.000000,13.102358)}
{pt3dadd(190104.000000,194304.000000,114075.000000,6.746526)}
{pt3dadd(190620.000000,194652.000000,113525.000000,6.746526)}
{pt3dadd(190692.000000,194892.000000,113450.000000,6.746526)}
{pt3dadd(191280.000000,195228.000000,113375.000000,11.993053)}
{pt3dadd(191496.000000,195624.000000,113125.000000,6.746526)}
{pt3dadd(192192.000000,196512.000000,112650.000000,6.746526)}
{pt3dadd(192540.000000,197016.000000,112225.000000,6.746526)}
{pt3dadd(192816.000000,197388.000000,111650.000000,13.102358)}
{pt3dadd(192612.000000,197388.000000,111100.000000,7.855832)}
{pt3dadd(192720.000000,197604.000000,110650.000000,7.855832)}
{pt3dadd(192588.000000,197808.000000,110050.000000,7.855832)}
{pt3dadd(192648.000000,197988.000000,109650.000000,12.880497)}
{pt3dadd(192648.000000,198060.000000,109350.000000,6.524665)}
{pt3dadd(192552.000000,198060.000000,108800.000000,6.524665)}
{pt3dadd(192540.000000,198048.000000,108325.000000,6.524665)}
{pt3dadd(192540.000000,198000.000000,107850.000000,11.771192)}
{pt3dadd(192636.000000,198132.000000,107275.000000,6.746526)}
{pt3dadd(192288.000000,198300.000000,106775.000000,6.646526)}
{pt3dadd(192288.000000,198552.000000,106300.000000,6.646526)}
{pt3dadd(192492.000000,199692.000000,105825.000000,13.002358)}
{pt3dadd(192792.000000,199548.000000,105500.000000,7.755832)}
{pt3dadd(193068.000000,199824.000000,104925.000000,7.755832)}
{pt3dadd(193932.000000,200088.000000,104075.000000,7.855832)}
{pt3dadd(193944.000000,200160.000000,103425.000000,15.542830)}
{pt3dadd(193884.000000,200220.000000,102950.000000,9.186998)}
{pt3dadd(194160.000000,200316.000000,102200.000000,9.186998)}
{pt3dadd(194220.000000,200328.000000,101675.000000,9.186998)}
{pt3dadd(194184.000000,200268.000000,101075.000000,15.542830)}
{pt3dadd(194340.000000,200268.000000,100325.000000,7.855832)}
{pt3dadd(194316.000000,200268.000000,99850.000000,7.855832)}
{pt3dadd(194556.000000,200364.000000,99150.000000,7.855832)}
{pt3dadd(194820.000000,200412.000000,98600.000000,15.542830)}
{pt3dadd(195120.000000,200508.000000,97925.000000,9.186998)}
{pt3dadd(195252.000000,200700.000000,97250.000000,9.186998)}
{pt3dadd(195564.000000,200940.000000,96525.000000,9.186998)}
{pt3dadd(195576.000000,201060.000000,96050.000000,16.873996)}
{pt3dadd(195768.000000,201144.000000,95450.000000,9.186998)}
{pt3dadd(195816.000000,201264.000000,94750.000000,9.186998)}
{pt3dadd(195636.000000,201492.000000,94100.000000,9.186998)}
{pt3dadd(195504.000000,201552.000000,93400.000000,16.873996)}
{pt3dadd(195444.000000,201612.000000,92925.000000,9.186998)}
{pt3dadd(195408.000000,201816.000000,92450.000000,9.186998)}
{pt3dadd(195456.000000,201864.000000,92000.000000,9.186998)}
{pt3dadd(195348.000000,201960.000000,91500.000000,16.873996)}
{pt3dadd(195252.000000,202044.000000,91000.000000,9.186998)}
{pt3dadd(195156.000000,202128.000000,90500.000000,9.186998)}
{pt3dadd(194940.000000,202320.000000,89975.000000,9.186998)}
{pt3dadd(194568.000000,202380.000000,89400.000000,16.873996)}
{pt3dadd(194244.000000,202392.000000,88775.000000,9.186998)}
{pt3dadd(194076.000000,202548.000000,88150.000000,9.186998)}
{pt3dadd(193944.000000,202560.000000,87475.000000,9.186998)}
{pt3dadd(193812.000000,202656.000000,86925.000000,16.873996)}
{pt3dadd(193560.000000,202812.000000,86375.000000,9.186998)}
{pt3dadd(193272.000000,202896.000000,85775.000000,9.186998)}
{pt3dadd(193032.000000,202944.000000,85250.000000,9.186998)}
{pt3dadd(192828.000000,202908.000000,84725.000000,18.471396)}
{pt3dadd(192768.000000,202944.000000,84275.000000,10.784398)}
{pt3dadd(192300.000000,203208.000000,83775.000000,10.784398)}
{pt3dadd(192120.000000,203220.000000,83025.000000,10.784398)}
{pt3dadd(191652.000000,203232.000000,82300.000000,20.068796)}
{pt3dadd(191244.000000,203328.000000,81525.000000,10.784398)}
{pt3dadd(190884.000000,203460.000000,80875.000000,10.784398)}
{pt3dadd(190308.000000,203400.000000,80150.000000,10.784398)}
{pt3dadd(189948.000000,203712.000000,79425.000000,13.484398)}
{pt3dadd(189744.000000,203772.000000,78825.000000,151.186260)}
{pt3dadd(189720.000000,203772.000000,78125.000000,250.977100)}
{pt3dadd(189660.000000,203736.000000,77400.000000,736.431300)}

{create adhoc8}
{access adhoc8}
{connect adhoc8(1), adhoc7(0)}
{nseg = 1}
{strdef color color = "White"}
{pt3dclear()}
{pt3dadd(189660.000000,203736.000000,77400.000000,736.431300)}
{pt3dadd(189312.000000,203568.000000,76750.000000,246.477100)}
{pt3dadd(189024.000000,203628.000000,76025.000000,157.770658)}
{pt3dadd(188748.000000,203628.000000,75325.000000,10.784398)}
{pt3dadd(188580.000000,203568.000000,74625.000000,10.784398)}
{pt3dadd(188328.000000,203544.000000,74150.000000,18.471396)}
{pt3dadd(188076.000000,203520.000000,73625.000000,9.186998)}
{pt3dadd(187944.000000,203532.000000,73200.000000,9.186998)}
{pt3dadd(187872.000000,203436.000000,72525.000000,9.186998)}
{pt3dadd(187560.000000,203436.000000,71775.000000,14.433524)}
{pt3dadd(187620.000000,203124.000000,71275.000000,11.993053)}
{pt3dadd(187368.000000,202908.000000,70525.000000,18.348885)}
{pt3dadd(187044.000000,202728.000000,69975.000000,29.581475)}
{pt3dadd(186756.000000,202416.000000,69375.000000,33.279160)}

{create adhoc9}
{access adhoc9}
{connect adhoc9(1), adhoc8(0)}
{nseg = 1}
{strdef color color = "White"}
{pt3dclear()}
{pt3dadd(186756.000000,202416.000000,69375.000000,33.279160)}
{pt3dadd(186348.000000,202056.000000,68775.000000,24.904717)}
{pt3dadd(186144.000000,201876.000000,68300.000000,15.542830)}
{pt3dadd(186192.000000,201252.000000,67675.000000,18.471396)}
{pt3dadd(186240.000000,201072.000000,67300.000000,10.784398)}
{pt3dadd(186072.000000,200664.000000,66825.000000,21.525623)}
{pt3dadd(186012.000000,200352.000000,66450.000000,32.266849)}
{pt3dadd(185664.000000,200076.000000,65775.000000,37.304085)}
{pt3dadd(185688.000000,199944.000000,65075.000000,55.206127)}

{create adhoc10}
{access adhoc10}
{connect adhoc10(1), adhoc9(0)}
{nseg = 1}
{strdef color color = "White"}
{pt3dclear()}
{pt3dadd(185688.000000,199944.000000,65075.000000,55.206127)}
{pt3dadd(185568.000000,197544.000000,65275.000000,46.505106)}
{pt3dadd(185136.000000,197400.000000,65275.000000,28.503063)}
{pt3dadd(183984.000000,197568.000000,65275.000000,21.313592)}
{pt3dadd(183624.000000,197448.000000,64775.000000,5.051754)}
{pt3dadd(183408.000000,196836.000000,64325.000000,5.051754)}
{pt3dadd(183432.000000,196092.000000,63750.000000,5.051754)}
{pt3dadd(183768.000000,194832.000000,62625.000000,11.407586)}
{pt3dadd(184104.000000,194184.000000,62125.000000,7.855832)}
{pt3dadd(184284.000000,193740.000000,61500.000000,7.855832)}
{pt3dadd(184644.000000,193224.000000,61025.000000,7.855832)}
{pt3dadd(184932.000000,192984.000000,60725.000000,14.211664)}
{pt3dadd(185136.000000,192696.000000,60725.000000,7.855832)}
{pt3dadd(185196.000000,192420.000000,60300.000000,7.855832)}
{pt3dadd(185244.000000,192156.000000,60250.000000,7.855832)}
{pt3dadd(185376.000000,191916.000000,60075.000000,14.211664)}
{pt3dadd(185460.000000,191616.000000,59950.000000,7.855832)}
{pt3dadd(185580.000000,191316.000000,59675.000000,7.855832)}
{pt3dadd(185712.000000,191004.000000,59600.000000,7.855832)}
{pt3dadd(185844.000000,190728.000000,59400.000000,11.407586)}
{pt3dadd(185892.000000,190500.000000,59400.000000,5.051754)}
{pt3dadd(185796.000000,190176.000000,59175.000000,5.051754)}
{pt3dadd(185796.000000,189984.000000,59100.000000,5.051754)}
{pt3dadd(185880.000000,189660.000000,58975.000000,11.407586)}
{pt3dadd(185844.000000,189336.000000,58875.000000,7.855832)}
{pt3dadd(185928.000000,189144.000000,58750.000000,7.855832)}
{pt3dadd(186012.000000,188808.000000,58750.000000,7.855832)}
{pt3dadd(186036.000000,188556.000000,58650.000000,14.211664)}
{pt3dadd(186228.000000,188244.000000,58625.000000,14.211664)}
{pt3dadd(186168.000000,187860.000000,58625.000000,22.686107)}
{pt3dadd(186132.000000,187524.000000,58750.000000,33.279160)}

{create adhoc11}
{access adhoc11}
{connect adhoc11(1), adhoc10(0)}
{nseg = 1}
{strdef color color = "White"}
{pt3dclear()}
{pt3dadd(186132.000000,187524.000000,58750.000000,33.279160)}
{pt3dadd(186096.000000,187248.000000,58725.000000,22.686107)}
{pt3dadd(186300.000000,186960.000000,58650.000000,14.211664)}
{pt3dadd(186612.000000,186624.000000,58425.000000,17.140230)}
{pt3dadd(187044.000000,186348.000000,58400.000000,10.784398)}
{pt3dadd(187140.000000,186000.000000,58325.000000,10.784398)}
{pt3dadd(187344.000000,185628.000000,58300.000000,10.784398)}
{pt3dadd(187392.000000,185280.000000,58325.000000,20.068796)}
{pt3dadd(187596.000000,184968.000000,58325.000000,10.784398)}
{pt3dadd(187596.000000,184632.000000,58300.000000,10.784398)}
{pt3dadd(187728.000000,184260.000000,58300.000000,10.784398)}
{pt3dadd(187932.000000,184008.000000,58100.000000,20.068796)}
{pt3dadd(188232.000000,183756.000000,58025.000000,20.068796)}
{pt3dadd(188328.000000,183480.000000,57900.000000,28.969818)}
{pt3dadd(188484.000000,183204.000000,57850.000000,47.283029)}
{pt3dadd(188544.000000,182928.000000,57850.000000,46.005108)}

{create adhoc12}
{access adhoc12}
{connect adhoc12(1), adhoc11(0)}
{nseg = 1}
{strdef color color = "White"}
{pt3dclear()}
{pt3dadd(188544.000000,182928.000000,57850.000000,46.005108)}
{pt3dadd(188664.000000,182664.000000,57800.000000,31.809033)}
{pt3dadd(188856.000000,182388.000000,57775.000000,19.685420)}
{pt3dadd(189096.000000,182028.000000,58050.000000,17.140230)}
{pt3dadd(189192.000000,181752.000000,58050.000000,15.542830)}
{pt3dadd(189432.000000,181440.000000,58100.000000,24.904717)}
{pt3dadd(189672.000000,181140.000000,58050.000000,39.934990)}

{create adhoc13}
{access adhoc13}
{connect adhoc13(1), adhoc12(0)}
{nseg = 1}
{strdef color color = "White"}
{pt3dclear()}
{pt3dadd(189672.000000,181140.000000,58050.000000,39.934990)}
{pt3dadd(189720.000000,180876.000000,57950.000000,23.055874)}
{pt3dadd(189780.000000,180552.000000,58000.000000,14.433524)}
{pt3dadd(190080.000000,180264.000000,57775.000000,11.993053)}
{pt3dadd(190104.000000,180012.000000,57725.000000,6.746526)}
{pt3dadd(190440.000000,179676.000000,57825.000000,6.746526)}
{pt3dadd(190800.000000,179412.000000,57675.000000,6.746526)}
{pt3dadd(191064.000000,179112.000000,57700.000000,11.993053)}
{pt3dadd(191184.000000,178788.000000,57825.000000,6.746526)}
{pt3dadd(191532.000000,178500.000000,57900.000000,6.746526)}
{pt3dadd(191724.000000,178224.000000,57725.000000,6.746526)}
{pt3dadd(192216.000000,177888.000000,57275.000000,14.433524)}
{pt3dadd(192444.000000,177528.000000,57150.000000,9.186998)}
{pt3dadd(192468.000000,177192.000000,56875.000000,9.186998)}
{pt3dadd(192636.000000,176940.000000,56875.000000,9.186998)}
{pt3dadd(192720.000000,176676.000000,56750.000000,16.873996)}
{pt3dadd(192852.000000,176328.000000,56550.000000,9.186998)}
{pt3dadd(192876.000000,176028.000000,56250.000000,9.186998)}
{pt3dadd(192852.000000,175716.000000,56100.000000,9.186998)}
{pt3dadd(192912.000000,175404.000000,55975.000000,16.554517)}
{pt3dadd(192840.000000,175044.000000,55750.000000,8.867519)}
{pt3dadd(192732.000000,174600.000000,55525.000000,8.867519)}
{pt3dadd(192708.000000,174276.000000,55425.000000,8.867519)}
{pt3dadd(192648.000000,173928.000000,55300.000000,14.114045)}
{pt3dadd(192552.000000,173556.000000,55325.000000,13.102358)}
{pt3dadd(192312.000000,173208.000000,55125.000000,20.837264)}
{pt3dadd(192180.000000,172800.000000,54825.000000,33.279160)}

{create adhoc14}
{access adhoc14}
{connect adhoc14(1), adhoc13(0)}
{nseg = 1}
{strdef color color = "White"}
{pt3dclear()}
{pt3dadd(192180.000000,172800.000000,54825.000000,33.279160)}
{pt3dadd(192264.000000,172620.000000,54900.000000,22.686107)}
{pt3dadd(192576.000000,172320.000000,55250.000000,26.825709)}
{pt3dadd(192696.000000,172092.000000,55800.000000,22.523408)}
{pt3dadd(192696.000000,171876.000000,56150.000000,27.732632)}

{create adhoc15}
{access adhoc15}
{connect adhoc15(1), adhoc14(0)}
{nseg = 1}
{strdef color color = "White"}
{pt3dclear()}
{pt3dadd(192696.000000,171876.000000,56150.000000,27.732632)}
{pt3dadd(191520.000000,172164.000000,53675.000000,14.202260)}
{pt3dadd(191256.000000,171876.000000,53375.000000,9.121356)}
{pt3dadd(190764.000000,170484.000000,53025.000000,6.249659)}
{pt3dadd(190548.000000,170268.000000,53000.000000,3.874829)}
{pt3dadd(190380.000000,170052.000000,52850.000000,3.874829)}
{pt3dadd(190356.000000,169764.000000,52900.000000,3.874829)}
{pt3dadd(190080.000000,169512.000000,52775.000000,9.121356)}
{pt3dadd(189984.000000,169296.000000,52800.000000,6.746526)}
{pt3dadd(189672.000000,167820.000000,52800.000000,6.746526)}
{pt3dadd(189684.000000,167652.000000,52475.000000,6.746526)}
{pt3dadd(189660.000000,167400.000000,52225.000000,11.993053)}
{pt3dadd(189756.000000,167160.000000,52275.000000,6.746526)}
{pt3dadd(189732.000000,166920.000000,52050.000000,6.746526)}
{pt3dadd(189780.000000,166668.000000,51925.000000,6.746526)}
{pt3dadd(189828.000000,166368.000000,51850.000000,12.836125)}
{pt3dadd(189948.000000,166128.000000,51825.000000,7.589598)}
{pt3dadd(189960.000000,165840.000000,51750.000000,7.589598)}
{pt3dadd(189828.000000,165588.000000,51775.000000,7.589598)}
{pt3dadd(189624.000000,165252.000000,51900.000000,11.911704)}
{pt3dadd(189552.000000,164988.000000,51700.000000,5.822105)}
{pt3dadd(189156.000000,163032.000000,51625.000000,5.822105)}
{pt3dadd(189168.000000,162852.000000,51175.000000,5.822105)}
{pt3dadd(189060.000000,162624.000000,51100.000000,10.144211)}
{pt3dadd(189120.000000,162360.000000,51100.000000,5.822105)}
{pt3dadd(189276.000000,162180.000000,50975.000000,5.822105)}
{pt3dadd(189240.000000,161928.000000,50900.000000,5.822105)}
{pt3dadd(189372.000000,160236.000000,50975.000000,8.731901)}
{pt3dadd(189156.000000,160020.000000,50725.000000,4.409795)}
{pt3dadd(189120.000000,159720.000000,50675.000000,4.409795)}
{pt3dadd(189024.000000,159480.000000,50575.000000,4.409795)}
{pt3dadd(189048.000000,159168.000000,50500.000000,8.731901)}
{pt3dadd(189072.000000,158892.000000,50500.000000,5.822105)}
{pt3dadd(189132.000000,158616.000000,50275.000000,5.822105)}
{pt3dadd(189252.000000,158388.000000,50275.000000,5.822105)}
{pt3dadd(189420.000000,158136.000000,50250.000000,11.068632)}
{pt3dadd(189480.000000,157908.000000,50200.000000,6.746526)}
{pt3dadd(189540.000000,157704.000000,50125.000000,6.746526)}
{pt3dadd(189708.000000,157476.000000,50100.000000,6.746526)}
{pt3dadd(189864.000000,157236.000000,50100.000000,11.993053)}
{pt3dadd(190056.000000,156996.000000,50025.000000,6.746526)}
{pt3dadd(190260.000000,156696.000000,50050.000000,6.746526)}
{pt3dadd(190380.000000,156432.000000,49950.000000,6.746526)}
{pt3dadd(190404.000000,156192.000000,49925.000000,11.068632)}
{pt3dadd(190596.000000,155892.000000,49925.000000,5.822105)}
{pt3dadd(190596.000000,155592.000000,49875.000000,5.822105)}
{pt3dadd(190524.000000,155316.000000,49825.000000,5.822105)}
{pt3dadd(190536.000000,155028.000000,49750.000000,9.373860)}
{pt3dadd(190620.000000,154764.000000,49900.000000,5.051754)}
{pt3dadd(190752.000000,154548.000000,49900.000000,5.051754)}
{pt3dadd(190836.000000,154284.000000,49875.000000,5.051754)}
{pt3dadd(190992.000000,154044.000000,49800.000000,9.373860)}
{pt3dadd(191148.000000,153804.000000,49825.000000,5.822105)}
{pt3dadd(191208.000000,153540.000000,49800.000000,5.822105)}
{pt3dadd(191232.000000,153312.000000,49775.000000,5.822105)}
{pt3dadd(191388.000000,153060.000000,49825.000000,10.144211)}
{pt3dadd(191388.000000,152820.000000,49750.000000,5.822105)}
{pt3dadd(191508.000000,152568.000000,49725.000000,5.822105)}
{pt3dadd(191532.000000,152268.000000,49750.000000,10.144211)}
{pt3dadd(191472.000000,151944.000000,49800.000000,13.695965)}
{pt3dadd(191556.000000,151644.000000,49925.000000,14.623100)}
{pt3dadd(191448.000000,151428.000000,49875.000000,19.258772)}

{create adhoc16}
{access adhoc16}
{connect adhoc16(1), adhoc15(0)}
{nseg = 1}
{strdef color color = "White"}
{pt3dclear()}
{pt3dadd(191448.000000,151428.000000,49875.000000,19.258772)}
{pt3dadd(191640.000000,151200.000000,49925.000000,14.623100)}
{pt3dadd(191604.000000,150996.000000,49850.000000,9.373860)}
{pt3dadd(191628.000000,150732.000000,49975.000000,9.373860)}
{pt3dadd(191688.000000,150420.000000,50100.000000,5.051754)}
{pt3dadd(191820.000000,150204.000000,50150.000000,5.051754)}
{pt3dadd(191844.000000,149988.000000,50075.000000,5.051754)}
{pt3dadd(191844.000000,149616.000000,50000.000000,9.373860)}
{pt3dadd(191844.000000,149448.000000,50000.000000,5.822105)}
{pt3dadd(191772.000000,149196.000000,49950.000000,10.144211)}
{pt3dadd(191748.000000,148884.000000,50000.000000,13.054006)}
{pt3dadd(191808.000000,148524.000000,49875.000000,13.553168)}
{pt3dadd(191976.000000,148236.000000,50000.000000,16.048977)}

{create adhoc17}
{access adhoc17}
{connect adhoc17(1), adhoc16(0)}
{nseg = 1}
{strdef color color = "White"}
{pt3dclear()}
{pt3dadd(191976.000000,148236.000000,50000.000000,16.048977)}
{pt3dadd(191808.000000,147816.000000,50025.000000,12.269250)}
{pt3dadd(191784.000000,147480.000000,50000.000000,7.961550)}
{pt3dadd(191988.000000,147132.000000,50200.000000,9.373860)}
{pt3dadd(191952.000000,146904.000000,50150.000000,5.822105)}
{pt3dadd(191748.000000,146592.000000,50100.000000,5.822105)}
{pt3dadd(191772.000000,146328.000000,50000.000000,5.822105)}
{pt3dadd(191784.000000,146100.000000,50025.000000,10.144211)}
{pt3dadd(191808.000000,145764.000000,50100.000000,5.822105)}
{pt3dadd(191868.000000,145416.000000,50100.000000,5.822105)}
{pt3dadd(191868.000000,145152.000000,50150.000000,5.822105)}
{pt3dadd(191964.000000,144804.000000,50050.000000,9.373860)}
{pt3dadd(191856.000000,144432.000000,50175.000000,5.051754)}
{pt3dadd(191952.000000,144132.000000,50250.000000,5.051754)}
{pt3dadd(191892.000000,143856.000000,50250.000000,5.051754)}
{pt3dadd(191916.000000,143544.000000,50375.000000,9.373860)}
{pt3dadd(192000.000000,143244.000000,50550.000000,5.822105)}
{pt3dadd(192012.000000,142944.000000,50600.000000,5.822105)}
{pt3dadd(192060.000000,142572.000000,50550.000000,5.822105)}
{pt3dadd(192180.000000,142248.000000,50675.000000,9.373860)}
{pt3dadd(192156.000000,141960.000000,50675.000000,5.051754)}
{pt3dadd(192288.000000,141684.000000,50650.000000,5.051754)}
{pt3dadd(192228.000000,141384.000000,50625.000000,5.051754)}
{pt3dadd(192564.000000,141120.000000,50675.000000,9.373860)}
{pt3dadd(192588.000000,140856.000000,50625.000000,5.822105)}
{pt3dadd(192792.000000,140592.000000,50750.000000,5.822105)}
{pt3dadd(192948.000000,140376.000000,50800.000000,5.822105)}
{pt3dadd(192912.000000,140148.000000,50800.000000,10.144211)}
{pt3dadd(193140.000000,139956.000000,51025.000000,5.822105)}
{pt3dadd(193140.000000,139692.000000,51150.000000,5.822105)}
{pt3dadd(193188.000000,139464.000000,51250.000000,5.822105)}
{pt3dadd(193344.000000,139140.000000,51425.000000,10.144211)}
{pt3dadd(193344.000000,138876.000000,51450.000000,5.822105)}
{pt3dadd(193368.000000,138648.000000,51575.000000,5.822105)}
{pt3dadd(193560.000000,138444.000000,51625.000000,5.822105)}
{pt3dadd(193500.000000,138192.000000,51775.000000,10.144211)}
{pt3dadd(193380.000000,137976.000000,51700.000000,5.822105)}
{pt3dadd(193428.000000,137736.000000,51825.000000,10.144211)}
{pt3dadd(193320.000000,137472.000000,51825.000000,13.054006)}
{pt3dadd(193344.000000,137196.000000,51950.000000,13.553168)}
{pt3dadd(193344.000000,136956.000000,52075.000000,16.048977)}

{create adhoc18}
{access adhoc18}
{connect adhoc18(1), adhoc17(0)}
{nseg = 1}
{strdef color color = "White"}
{pt3dclear()}
{pt3dadd(193344.000000,136956.000000,52075.000000,16.048977)}
{pt3dadd(193548.000000,136740.000000,52300.000000,10.985332)}
{pt3dadd(193608.000000,136524.000000,52625.000000,7.191199)}
{pt3dadd(193632.000000,136284.000000,52900.000000,6.656233)}
{pt3dadd(193560.000000,136020.000000,53100.000000,3.874829)}
{pt3dadd(193344.000000,135732.000000,53100.000000,3.874829)}
{pt3dadd(193308.000000,135492.000000,53225.000000,3.874829)}
{pt3dadd(193236.000000,135216.000000,53150.000000,7.272514)}
{pt3dadd(193164.000000,134952.000000,53100.000000,4.897684)}
{pt3dadd(193104.000000,134724.000000,53125.000000,4.897684)}
{pt3dadd(192972.000000,134424.000000,53175.000000,4.897684)}
{pt3dadd(193056.000000,134124.000000,53150.000000,8.449439)}
{pt3dadd(193116.000000,133860.000000,53050.000000,5.051754)}
{pt3dadd(193116.000000,133560.000000,53025.000000,5.051754)}
{pt3dadd(193080.000000,133296.000000,53050.000000,5.051754)}
{pt3dadd(193020.000000,132948.000000,53175.000000,9.373860)}
{pt3dadd(192996.000000,132684.000000,53100.000000,5.822105)}
{pt3dadd(192924.000000,132384.000000,53150.000000,5.822105)}
{pt3dadd(192900.000000,132144.000000,53100.000000,5.822105)}
{pt3dadd(192684.000000,131808.000000,53175.000000,9.373860)}
{pt3dadd(192648.000000,131544.000000,53175.000000,5.051754)}
{pt3dadd(192516.000000,131256.000000,53250.000000,5.051754)}
{pt3dadd(192384.000000,130956.000000,53175.000000,5.051754)}
{pt3dadd(192216.000000,130584.000000,53100.000000,8.603509)}
{pt3dadd(192000.000000,130260.000000,53100.000000,5.051754)}
{pt3dadd(191940.000000,129972.000000,53100.000000,5.051754)}
{pt3dadd(191796.000000,129672.000000,53100.000000,5.051754)}
{pt3dadd(191616.000000,129396.000000,53000.000000,9.373860)}
{pt3dadd(191700.000000,129096.000000,52950.000000,5.822105)}
{pt3dadd(191604.000000,128832.000000,52925.000000,5.822105)}
{pt3dadd(191628.000000,127164.000000,52925.000000,5.822105)}
{pt3dadd(191496.000000,126924.000000,52725.000000,9.373860)}
{pt3dadd(191460.000000,126684.000000,52675.000000,5.051754)}
{pt3dadd(191388.000000,126444.000000,52600.000000,5.051754)}
{pt3dadd(191280.000000,126168.000000,52450.000000,5.051754)}
{pt3dadd(191184.000000,125844.000000,52225.000000,8.449439)}
{pt3dadd(191004.000000,125484.000000,51925.000000,8.449439)}
{pt3dadd(190968.000000,125184.000000,51900.000000,12.001193)}
{pt3dadd(190944.000000,124944.000000,51900.000000,19.001989)}
{pt3dadd(190908.000000,124764.000000,51800.000000,19.258772)}

{create adhoc19}
{access adhoc19}
{connect adhoc19(1), adhoc18(0)}
{nseg = 1}
{strdef color color = "White"}
{pt3dclear()}
{pt3dadd(190908.000000,124764.000000,51800.000000,19.258772)}
{pt3dadd(189540.000000,124968.000000,50875.000000,10.634632)}
{pt3dadd(189336.000000,125148.000000,51150.000000,6.980779)}
{pt3dadd(189084.000000,124980.000000,51150.000000,5.803854)}
{pt3dadd(188844.000000,124800.000000,51100.000000,3.874829)}
{pt3dadd(188712.000000,124656.000000,51050.000000,3.874829)}
{pt3dadd(188232.000000,124596.000000,51050.000000,3.874829)}
{pt3dadd(188052.000000,124524.000000,51025.000000,4.864774)}
{pt3dadd(187800.000000,124356.000000,50950.000000,2.489945)}
{pt3dadd(187644.000000,124320.000000,50900.000000,2.489945)}
{pt3dadd(187452.000000,124320.000000,50900.000000,2.489945)}
{pt3dadd(187212.000000,124296.000000,50850.000000,3.737879)}
{pt3dadd(186840.000000,124236.000000,50925.000000,2.747934)}
{pt3dadd(186636.000000,124188.000000,50900.000000,2.747934)}
{pt3dadd(186432.000000,124128.000000,50825.000000,2.747934)}
{pt3dadd(186252.000000,124068.000000,50825.000000,3.933950)}
{pt3dadd(186048.000000,124068.000000,50775.000000,2.686016)}
{pt3dadd(185844.000000,124008.000000,50700.000000,3.132512)}
{pt3dadd(185616.000000,123948.000000,50575.000000,3.579008)}
{pt3dadd(184404.000000,123816.000000,50275.000000,2.988320)}
{pt3dadd(183516.000000,123564.000000,50100.000000,3.732480)}

{create adhoc20}
{access adhoc20}
{connect adhoc20(1), adhoc18(0)}
{nseg = 1}
{strdef color color = "White"}
{pt3dclear()}
{pt3dadd(190908.000000,124764.000000,51800.000000,19.258772)}
{pt3dadd(190860.000000,124512.000000,51775.000000,11.377640)}
{pt3dadd(190860.000000,124308.000000,51775.000000,7.426584)}
{pt3dadd(190836.000000,124116.000000,51800.000000,6.249659)}
{pt3dadd(190860.000000,123780.000000,51725.000000,3.874829)}
{pt3dadd(190824.000000,123528.000000,51650.000000,8.196935)}
{pt3dadd(190752.000000,123312.000000,51500.000000,12.519040)}
{pt3dadd(190836.000000,123084.000000,51400.000000,15.907018)}
{pt3dadd(190776.000000,122832.000000,51350.000000,23.110527)}

{create adhoc21}
{access adhoc21}
{connect adhoc21(1), adhoc20(0)}
{nseg = 1}
{strdef color color = "White"}
{pt3dclear()}
{pt3dadd(190776.000000,122832.000000,51350.000000,23.110527)}
{pt3dadd(191160.000000,122556.000000,50325.000000,13.339182)}
{pt3dadd(191160.000000,122460.000000,50000.000000,8.603509)}
{pt3dadd(191136.000000,122328.000000,49600.000000,6.656233)}
{pt3dadd(191040.000000,122160.000000,49225.000000,3.874829)}
{pt3dadd(190896.000000,122172.000000,48900.000000,3.874829)}
{pt3dadd(190944.000000,122016.000000,48525.000000,3.874829)}
{pt3dadd(190920.000000,122064.000000,48300.000000,6.249659)}
{pt3dadd(190920.000000,122004.000000,48050.000000,3.874829)}
{pt3dadd(190896.000000,121692.000000,47700.000000,3.874829)}
{pt3dadd(190824.000000,121620.000000,47400.000000,3.874829)}
{pt3dadd(190728.000000,121380.000000,47000.000000,6.784625)}
{pt3dadd(190848.000000,121212.000000,46550.000000,6.784625)}
{pt3dadd(190980.000000,120972.000000,45975.000000,10.307708)}
{pt3dadd(191004.000000,120864.000000,45975.000000,13.374147)}

{create adhoc22}
{access adhoc22}
{connect adhoc22(1), adhoc20(0)}
{nseg = 1}
{strdef color color = "White"}
{pt3dclear()}
{pt3dadd(190776.000000,122832.000000,51350.000000,23.110527)}
{pt3dadd(190752.000000,122532.000000,51750.000000,12.661558)}
{pt3dadd(190764.000000,122304.000000,51950.000000,8.196935)}
{pt3dadd(190656.000000,122004.000000,51875.000000,6.656233)}
{pt3dadd(190584.000000,121692.000000,51875.000000,4.281404)}
{pt3dadd(190704.000000,121368.000000,51725.000000,4.281404)}
{pt3dadd(190728.000000,121032.000000,51675.000000,4.281404)}
{pt3dadd(190668.000000,120708.000000,51775.000000,6.656233)}
{pt3dadd(190668.000000,120420.000000,51700.000000,3.874829)}
{pt3dadd(190764.000000,120144.000000,51775.000000,3.874829)}
{pt3dadd(191028.000000,119856.000000,51825.000000,3.874829)}
{pt3dadd(191004.000000,119580.000000,51775.000000,6.249659)}
{pt3dadd(191004.000000,119304.000000,51750.000000,3.874829)}
{pt3dadd(191064.000000,118992.000000,51775.000000,3.874829)}
{pt3dadd(191064.000000,118716.000000,51800.000000,3.874829)}
{pt3dadd(190956.000000,118452.000000,51825.000000,6.249659)}
{pt3dadd(190812.000000,118212.000000,51800.000000,3.874829)}
{pt3dadd(190788.000000,117996.000000,51825.000000,3.874829)}
{pt3dadd(190644.000000,117744.000000,51825.000000,3.874829)}
{pt3dadd(190704.000000,117504.000000,51825.000000,6.249659)}
{pt3dadd(190716.000000,117288.000000,52000.000000,3.874829)}
{pt3dadd(190620.000000,117096.000000,52125.000000,3.874829)}
{pt3dadd(190440.000000,116892.000000,52150.000000,3.874829)}
{pt3dadd(190272.000000,116688.000000,52100.000000,7.272514)}
{pt3dadd(190176.000000,116460.000000,52100.000000,4.897684)}
{pt3dadd(189972.000000,116172.000000,52100.000000,4.897684)}
{pt3dadd(189828.000000,115920.000000,52000.000000,4.897684)}
{pt3dadd(189756.000000,115656.000000,51925.000000,7.679088)}
{pt3dadd(189516.000000,115380.000000,51975.000000,4.281404)}
{pt3dadd(189480.000000,115116.000000,51975.000000,4.281404)}
{pt3dadd(189264.000000,114876.000000,52025.000000,4.281404)}
{pt3dadd(189168.000000,114648.000000,52075.000000,7.191199)}
{pt3dadd(189060.000000,114384.000000,52075.000000,4.409795)}
{pt3dadd(188892.000000,114132.000000,52125.000000,4.409795)}
{pt3dadd(188820.000000,113916.000000,52125.000000,7.961550)}
{pt3dadd(188712.000000,113688.000000,52175.000000,11.513304)}
{pt3dadd(188508.000000,113376.000000,52050.000000,13.339181)}
{pt3dadd(188472.000000,113064.000000,52100.000000,19.258772)}

{create adhoc23}
{access adhoc23}
{connect adhoc23(1), adhoc22(0)}
{nseg = 1}
{strdef color color = "White"}
{pt3dclear()}
{pt3dadd(188472.000000,113064.000000,52100.000000,19.258772)}
{pt3dadd(188304.000000,112920.000000,52625.000000,13.339181)}
{pt3dadd(188136.000000,112752.000000,52675.000000,8.603509)}
{pt3dadd(187896.000000,112560.000000,52800.000000,7.961550)}
{pt3dadd(187704.000000,112308.000000,53050.000000,4.409795)}
{pt3dadd(187440.000000,112020.000000,53100.000000,4.409795)}
{pt3dadd(187176.000000,111804.000000,53200.000000,4.409795)}
{pt3dadd(186912.000000,111396.000000,53300.000000,6.338820)}
{pt3dadd(186684.000000,110880.000000,53425.000000,3.429025)}
{pt3dadd(186576.000000,110604.000000,53550.000000,3.429025)}
{pt3dadd(186444.000000,110376.000000,53525.000000,3.429025)}
{pt3dadd(186408.000000,110124.000000,53600.000000,5.358049)}
{pt3dadd(186420.000000,109908.000000,53575.000000,3.429025)}
{pt3dadd(186384.000000,109680.000000,53575.000000,3.429025)}
{pt3dadd(186396.000000,109428.000000,53600.000000,3.429025)}
{pt3dadd(186372.000000,109176.000000,53575.000000,5.358049)}
{pt3dadd(186348.000000,107688.000000,53700.000000,3.429025)}
{pt3dadd(186420.000000,107460.000000,53700.000000,3.429025)}
{pt3dadd(186468.000000,107268.000000,53700.000000,3.429025)}
{pt3dadd(186552.000000,107100.000000,53725.000000,4.986545)}
{pt3dadd(186552.000000,106896.000000,53775.000000,3.057520)}
{pt3dadd(186636.000000,106716.000000,53825.000000,3.057520)}
{pt3dadd(186564.000000,106500.000000,54100.000000,3.057520)}
{pt3dadd(186588.000000,106284.000000,54250.000000,5.967316)}
{pt3dadd(186612.000000,106020.000000,54300.000000,4.409795)}
{pt3dadd(186576.000000,105780.000000,54325.000000,4.409795)}
{pt3dadd(186480.000000,105564.000000,54450.000000,4.409795)}
{pt3dadd(186408.000000,105348.000000,54450.000000,5.967316)}
{pt3dadd(186204.000000,104832.000000,54350.000000,3.057520)}
{pt3dadd(186072.000000,104640.000000,54300.000000,3.057520)}
{pt3dadd(186000.000000,104424.000000,54225.000000,3.057520)}
{pt3dadd(185832.000000,104172.000000,54050.000000,4.305454)}
{pt3dadd(185808.000000,103932.000000,54025.000000,3.522888)}
{pt3dadd(185748.000000,103644.000000,53950.000000,4.871480)}
{pt3dadd(185676.000000,103488.000000,53900.000000,5.374770)}

{create adhoc24}
{access adhoc24}
{connect adhoc24(1), adhoc22(0)}
{nseg = 1}
{strdef color color = "White"}
{pt3dclear()}
{pt3dadd(188472.000000,113064.000000,52100.000000,19.258772)}
{pt3dadd(188628.000000,112836.000000,51450.000000,10.634632)}
{pt3dadd(188568.000000,112560.000000,51125.000000,6.980779)}
{pt3dadd(188532.000000,112056.000000,50725.000000,4.986545)}
{pt3dadd(188316.000000,111828.000000,50425.000000,3.057520)}
{pt3dadd(188028.000000,111612.000000,49925.000000,3.057520)}
{pt3dadd(187968.000000,111384.000000,49525.000000,3.057520)}
{pt3dadd(187992.000000,111192.000000,49450.000000,4.986545)}
{pt3dadd(188184.000000,111132.000000,49125.000000,3.429025)}
{pt3dadd(188268.000000,110760.000000,48725.000000,5.358049)}
{pt3dadd(188232.000000,110532.000000,48500.000000,6.605983)}
{pt3dadd(188280.000000,110376.000000,48225.000000,6.794931)}
{pt3dadd(188292.000000,110232.000000,48150.000000,7.739669)}

{create adhoc25}
{access adhoc25}
{connect adhoc25(1), adhoc17(0)}
{nseg = 1}
{strdef color color = "White"}
{pt3dclear()}
{pt3dadd(193344.000000,136956.000000,52075.000000,16.048977)}
{pt3dadd(192312.000000,136944.000000,51250.000000,8.945526)}
{pt3dadd(192132.000000,136800.000000,51075.000000,5.967316)}
{pt3dadd(191820.000000,136620.000000,50850.000000,4.047465)}
{pt3dadd(191568.000000,136428.000000,50750.000000,2.489945)}
{pt3dadd(191400.000000,136248.000000,50450.000000,2.489945)}
{pt3dadd(191136.000000,136212.000000,50350.000000,2.489945)}
{pt3dadd(190956.000000,135960.000000,50125.000000,3.264899)}
{pt3dadd(190776.000000,135900.000000,49950.000000,2.274954)}
{pt3dadd(190596.000000,135792.000000,49800.000000,2.274954)}
{pt3dadd(190416.000000,135648.000000,49700.000000,2.274954)}
{pt3dadd(190236.000000,135444.000000,49550.000000,3.832474)}
{pt3dadd(190032.000000,135384.000000,49400.000000,3.057520)}
{pt3dadd(189852.000000,135264.000000,49300.000000,3.057520)}
{pt3dadd(189576.000000,135012.000000,49125.000000,3.057520)}
{pt3dadd(189396.000000,134880.000000,49050.000000,5.325357)}
{pt3dadd(189216.000000,134820.000000,49050.000000,3.767836)}
{pt3dadd(189000.000000,134760.000000,48850.000000,3.767836)}
{pt3dadd(188784.000000,134652.000000,48800.000000,3.767836)}
{pt3dadd(188568.000000,134616.000000,48650.000000,5.325357)}
{pt3dadd(188364.000000,134544.000000,48625.000000,3.057520)}
{pt3dadd(188208.000000,134448.000000,48625.000000,3.057520)}
{pt3dadd(187956.000000,134544.000000,48625.000000,3.057520)}
{pt3dadd(187716.000000,134328.000000,48450.000000,3.832474)}
{pt3dadd(187140.000000,134196.000000,48275.000000,2.274954)}
{pt3dadd(186948.000000,134088.000000,48075.000000,2.274954)}
{pt3dadd(186708.000000,134064.000000,47650.000000,3.049908)}
{pt3dadd(186456.000000,133992.000000,47225.000000,3.371988)}
{pt3dadd(186276.000000,133680.000000,46725.000000,3.328390)}
{pt3dadd(186144.000000,133704.000000,46700.000000,3.110400)}

{create adhoc26}
{access adhoc26}
{connect adhoc26(1), adhoc16(0)}
{nseg = 1}
{strdef color color = "White"}
{pt3dclear()}
{pt3dadd(191976.000000,148236.000000,50000.000000,16.048977)}
{pt3dadd(190344.000000,147240.000000,50000.000000,8.429549)}
{pt3dadd(190116.000000,147180.000000,49925.000000,5.657729)}
{pt3dadd(189888.000000,147276.000000,49900.000000,3.737879)}
{pt3dadd(189660.000000,147288.000000,49750.000000,2.489945)}
{pt3dadd(189384.000000,147288.000000,49650.000000,2.489945)}
{pt3dadd(189132.000000,147348.000000,49350.000000,2.489945)}
{pt3dadd(188880.000000,147348.000000,49125.000000,3.479890)}
{pt3dadd(188688.000000,147252.000000,48675.000000,2.489945)}
{pt3dadd(188472.000000,147156.000000,48400.000000,3.085740)}
{pt3dadd(188244.000000,147120.000000,48275.000000,3.645703)}
{pt3dadd(187944.000000,147084.000000,48200.000000,3.426264)}
{pt3dadd(187392.000000,147084.000000,47775.000000,4.299816)}

{create adhoc27}
{access adhoc27}
{connect adhoc27(1), adhoc26(0)}
{nseg = 1}
{strdef color color = "White"}
{pt3dclear()}
{pt3dadd(187392.000000,147084.000000,47775.000000,4.299816)}
{pt3dadd(186576.000000,147540.000000,47475.000000,3.541432)}
{pt3dadd(186396.000000,147684.000000,47425.000000,2.592000)}

{create adhoc28}
{access adhoc28}
{connect adhoc28(1), adhoc26(0)}
{nseg = 1}
{strdef color color = "White"}
{pt3dclear()}
{pt3dadd(187392.000000,147084.000000,47775.000000,4.299816)}
{pt3dadd(187296.000000,146712.000000,47575.000000,2.970072)}
{pt3dadd(187176.000000,146388.000000,47375.000000,2.382043)}
{pt3dadd(187128.000000,146184.000000,47225.000000,2.554036)}
{pt3dadd(186996.000000,145932.000000,47000.000000,2.678452)}
{pt3dadd(186924.000000,145500.000000,46775.000000,2.896852)}
{pt3dadd(186984.000000,145320.000000,46675.000000,3.828087)}
{pt3dadd(186948.000000,145080.000000,46625.000000,2.592000)}

{create adhoc29}
{access adhoc29}
{connect adhoc29(1), adhoc15(0)}
{nseg = 1}
{strdef color color = "White"}
{pt3dclear()}
{pt3dadd(191448.000000,151428.000000,49875.000000,19.258772)}
{pt3dadd(190716.000000,151332.000000,50400.000000,9.891623)}
{pt3dadd(190320.000000,151296.000000,50700.000000,6.534974)}
{pt3dadd(189816.000000,151296.000000,51050.000000,4.540740)}
{pt3dadd(189636.000000,151224.000000,51200.000000,3.057520)}
{pt3dadd(189444.000000,151272.000000,51350.000000,3.057520)}
{pt3dadd(188952.000000,151548.000000,51600.000000,3.057520)}
{pt3dadd(188688.000000,151680.000000,51950.000000,4.615041)}
{pt3dadd(188448.000000,151680.000000,52325.000000,3.504016)}
{pt3dadd(188316.000000,151680.000000,52500.000000,4.840027)}
{pt3dadd(188100.000000,151680.000000,52700.000000,3.732480)}

{create adhoc30}
{access adhoc30}
{connect adhoc30(1), adhoc14(0)}
{nseg = 1}
{strdef color color = "White"}
{pt3dclear()}
{pt3dadd(192696.000000,171876.000000,56150.000000,27.732632)}
{pt3dadd(192828.000000,171612.000000,56325.000000,17.447720)}
{pt3dadd(192996.000000,171300.000000,56400.000000,11.068632)}
{pt3dadd(193200.000000,171024.000000,56425.000000,10.144211)}
{pt3dadd(193224.000000,170676.000000,56550.000000,5.822105)}
{pt3dadd(193248.000000,170400.000000,56600.000000,5.822105)}
{pt3dadd(193404.000000,170112.000000,56750.000000,5.822105)}
{pt3dadd(193704.000000,169836.000000,56850.000000,11.068632)}
{pt3dadd(193836.000000,169572.000000,57075.000000,6.746526)}
{pt3dadd(193668.000000,169320.000000,57200.000000,6.746526)}
{pt3dadd(193800.000000,169056.000000,57325.000000,6.746526)}
{pt3dadd(193776.000000,168780.000000,57375.000000,10.883748)}
{pt3dadd(193788.000000,168480.000000,57425.000000,5.637221)}
{pt3dadd(193776.000000,168264.000000,57300.000000,5.637221)}
{pt3dadd(193644.000000,168036.000000,57475.000000,5.637221)}
{pt3dadd(193704.000000,167820.000000,57500.000000,10.883748)}
{pt3dadd(193800.000000,167568.000000,57675.000000,6.746526)}
{pt3dadd(193920.000000,167256.000000,57675.000000,6.746526)}
{pt3dadd(194004.000000,166980.000000,57825.000000,13.102358)}
{pt3dadd(193860.000000,166704.000000,57850.000000,19.458190)}
{pt3dadd(193680.000000,166416.000000,57750.000000,22.686107)}
{pt3dadd(193584.000000,166188.000000,57725.000000,33.279160)}

{create adhoc31}
{access adhoc31}
{connect adhoc31(1), adhoc30(0)}
{nseg = 1}
{strdef color color = "White"}
{pt3dclear()}
{pt3dadd(193584.000000,166188.000000,57725.000000,33.279160)}
{pt3dadd(191460.000000,165336.000000,57900.000000,15.308094)}
{pt3dadd(191232.000000,165240.000000,57850.000000,9.784857)}
{pt3dadd(191076.000000,165168.000000,57775.000000,4.676958)}
{pt3dadd(190152.000000,164772.000000,57950.000000,2.747934)}
{pt3dadd(189936.000000,164700.000000,58200.000000,2.747934)}
{pt3dadd(189708.000000,164688.000000,58375.000000,2.747934)}
{pt3dadd(189504.000000,164748.000000,58400.000000,3.522888)}
{pt3dadd(189300.000000,164880.000000,58450.000000,2.274954)}
{pt3dadd(188616.000000,165120.000000,58775.000000,2.274954)}
{pt3dadd(188376.000000,165264.000000,59000.000000,3.264899)}
{pt3dadd(188136.000000,165492.000000,59075.000000,3.483299)}
{pt3dadd(187944.000000,165552.000000,59125.000000,3.513908)}
{pt3dadd(187848.000000,165600.000000,59125.000000,2.592000)}

{create adhoc32}
{access adhoc32}
{connect adhoc32(1), adhoc30(0)}
{nseg = 1}
{strdef color color = "White"}
{pt3dclear()}
{pt3dadd(193584.000000,166188.000000,57725.000000,33.279160)}
{pt3dadd(193512.000000,165924.000000,57575.000000,33.279160)}
{pt3dadd(193596.000000,165672.000000,57450.000000,33.279160)}

{create adhoc33}
{access adhoc33}
{connect adhoc33(1), adhoc32(0)}
{nseg = 1}
{strdef color color = "White"}
{pt3dclear()}
{pt3dadd(193596.000000,165672.000000,57450.000000,33.279160)}
{pt3dadd(191868.000000,166764.000000,57450.000000,19.296562)}
{pt3dadd(189564.000000,166284.000000,57450.000000,15.729692)}
{pt3dadd(189288.000000,166140.000000,57425.000000,12.925614)}
{pt3dadd(189048.000000,166032.000000,57375.000000,13.339181)}
{pt3dadd(188892.000000,166008.000000,57350.000000,19.258772)}

{create adhoc34}
{access adhoc34}
{connect adhoc34(1), adhoc33(0)}
{nseg = 1}
{strdef color color = "White"}
{pt3dclear()}
{pt3dadd(188892.000000,166008.000000,57350.000000,19.258772)}
{pt3dadd(188388.000000,164784.000000,57375.000000,10.634632)}
{pt3dadd(188400.000000,164556.000000,57275.000000,7.397415)}
{pt3dadd(187968.000000,163968.000000,57350.000000,4.064061)}
{pt3dadd(187380.000000,163644.000000,57175.000000,2.558393)}
{pt3dadd(187344.000000,163512.000000,57100.000000,2.592000)}

{create adhoc35}
{access adhoc35}
{connect adhoc35(1), adhoc33(0)}
{nseg = 1}
{strdef color color = "White"}
{pt3dclear()}
{pt3dadd(188892.000000,166008.000000,57350.000000,19.258772)}
{pt3dadd(187632.000000,166368.000000,57425.000000,11.377640)}
{pt3dadd(187404.000000,166308.000000,57450.000000,7.426584)}
{pt3dadd(187176.000000,166440.000000,57450.000000,6.784625)}
{pt3dadd(186960.000000,166452.000000,57725.000000,4.409795)}
{pt3dadd(186744.000000,166620.000000,57875.000000,4.409795)}
{pt3dadd(186264.000000,166716.000000,58150.000000,4.409795)}
{pt3dadd(186156.000000,166992.000000,58650.000000,7.319591)}
{pt3dadd(186084.000000,167388.000000,59050.000000,4.409795)}
{pt3dadd(185976.000000,167664.000000,59200.000000,4.409795)}
{pt3dadd(186108.000000,167868.000000,59475.000000,4.409795)}
{pt3dadd(186036.000000,168072.000000,59875.000000,7.807480)}
{pt3dadd(186156.000000,168264.000000,60250.000000,7.807480)}
{pt3dadd(186516.000000,168420.000000,60650.000000,9.736504)}
{pt3dadd(186528.000000,168312.000000,61025.000000,15.227507)}
{pt3dadd(186552.000000,168624.000000,61400.000000,11.145123)}

{create adhoc36}
{access adhoc36}
{connect adhoc36(1), adhoc35(0)}
{nseg = 1}
{strdef color color = "White"}
{pt3dclear()}
{pt3dadd(186552.000000,168624.000000,61400.000000,11.145123)}
{pt3dadd(187200.000000,168072.000000,61450.000000,11.090636)}
{pt3dadd(187368.000000,168000.000000,61650.000000,9.287602)}

{create adhoc37}
{access adhoc37}
{connect adhoc37(1), adhoc36(0)}
{nseg = 1}
{strdef color color = "White"}
{pt3dclear()}
{pt3dadd(187368.000000,168000.000000,61650.000000,9.287602)}
{pt3dadd(188280.000000,167856.000000,61625.000000,5.387457)}
{pt3dadd(188640.000000,167772.000000,61875.000000,3.832474)}
{pt3dadd(189516.000000,167628.000000,62200.000000,3.522888)}
{pt3dadd(189852.000000,167796.000000,62350.000000,3.522888)}
{pt3dadd(189828.000000,167976.000000,62450.000000,4.871480)}
{pt3dadd(189876.000000,167964.000000,62725.000000,5.374770)}

{create adhoc38}
{access adhoc38}
{connect adhoc38(1), adhoc36(0)}
{nseg = 1}
{strdef color color = "White"}
{pt3dclear()}
{pt3dadd(187368.000000,168000.000000,61650.000000,9.287602)}
{pt3dadd(187536.000000,167856.000000,62075.000000,5.659779)}
{pt3dadd(187728.000000,167664.000000,62300.000000,5.063554)}
{pt3dadd(187848.000000,167484.000000,63075.000000,3.279478)}
{pt3dadd(187896.000000,167400.000000,63125.000000,3.583180)}

{create adhoc39}
{access adhoc39}
{connect adhoc39(1), adhoc35(0)}
{nseg = 1}
{strdef color color = "White"}
{pt3dclear()}
{pt3dadd(186552.000000,168624.000000,61400.000000,11.145123)}
{pt3dadd(186684.000000,169020.000000,61675.000000,8.673090)}
{pt3dadd(186732.000000,169260.000000,62050.000000,7.463124)}
{pt3dadd(186828.000000,169164.000000,62400.000000,4.265451)}
{pt3dadd(187260.000000,168816.000000,62700.000000,4.846628)}

{create adhoc40}
{access adhoc40}
{connect adhoc40(1), adhoc32(0)}
{nseg = 1}
{strdef color color = "White"}
{pt3dclear()}
{pt3dadd(193596.000000,165672.000000,57450.000000,33.279160)}
{pt3dadd(193836.000000,165384.000000,57375.000000,22.686107)}
{pt3dadd(194064.000000,165060.000000,57250.000000,14.211664)}
{pt3dadd(194304.000000,164832.000000,57275.000000,11.407586)}
{pt3dadd(194688.000000,164604.000000,57300.000000,5.051754)}
{pt3dadd(195000.000000,164304.000000,57350.000000,5.051754)}
{pt3dadd(195096.000000,164004.000000,57325.000000,5.051754)}
{pt3dadd(195264.000000,163716.000000,57300.000000,8.603509)}
{pt3dadd(195456.000000,163416.000000,57275.000000,5.051754)}
{pt3dadd(195504.000000,163164.000000,57225.000000,5.051754)}
{pt3dadd(195528.000000,162864.000000,57225.000000,5.051754)}
{pt3dadd(195588.000000,162576.000000,57200.000000,10.298281)}
{pt3dadd(195648.000000,162276.000000,57125.000000,6.746526)}
{pt3dadd(195696.000000,161952.000000,57000.000000,6.746526)}
{pt3dadd(195564.000000,161760.000000,56925.000000,6.746526)}
{pt3dadd(195504.000000,161544.000000,56875.000000,13.102358)}
{pt3dadd(195528.000000,161184.000000,56800.000000,7.855832)}
{pt3dadd(195432.000000,160896.000000,56775.000000,7.855832)}
{pt3dadd(195336.000000,160620.000000,56650.000000,7.855832)}
{pt3dadd(195204.000000,160332.000000,56475.000000,13.102358)}
{pt3dadd(195168.000000,160080.000000,56375.000000,6.746526)}
{pt3dadd(195096.000000,159816.000000,56300.000000,6.746526)}
{pt3dadd(194988.000000,159624.000000,56350.000000,6.746526)}
{pt3dadd(194844.000000,159300.000000,56275.000000,11.068632)}
{pt3dadd(194700.000000,158988.000000,56225.000000,5.822105)}
{pt3dadd(194640.000000,158700.000000,56350.000000,5.822105)}
{pt3dadd(194616.000000,158388.000000,56300.000000,5.822105)}
{pt3dadd(194580.000000,158088.000000,56325.000000,10.144211)}
{pt3dadd(194484.000000,157800.000000,56225.000000,9.959327)}
{pt3dadd(194532.000000,157548.000000,56250.000000,14.281432)}
{pt3dadd(194460.000000,157236.000000,56375.000000,22.802387)}
{pt3dadd(194400.000000,156936.000000,56375.000000,23.110527)}

{create adhoc41}
{access adhoc41}
{connect adhoc41(1), adhoc40(0)}
{nseg = 1}
{strdef color color = "White"}
{pt3dclear()}
{pt3dadd(194400.000000,156936.000000,56375.000000,23.110527)}
{pt3dadd(193932.000000,156816.000000,56875.000000,9.995099)}
{pt3dadd(193524.000000,156420.000000,57075.000000,7.157023)}
{pt3dadd(192816.000000,155364.000000,57125.000000,3.281413)}
{pt3dadd(192624.000000,155196.000000,57075.000000,3.177432)}
{pt3dadd(192528.000000,155088.000000,57075.000000,3.732480)}

{create adhoc42}
{access adhoc42}
{connect adhoc42(1), adhoc40(0)}
{nseg = 1}
{strdef color color = "White"}
{pt3dclear()}
{pt3dadd(194400.000000,156936.000000,56375.000000,23.110527)}
{pt3dadd(194484.000000,156744.000000,56375.000000,15.907018)}
{pt3dadd(194412.000000,156480.000000,56400.000000,10.144211)}
{pt3dadd(194412.000000,156156.000000,56425.000000,10.144211)}
{pt3dadd(194496.000000,155856.000000,56425.000000,5.822105)}
{pt3dadd(194508.000000,155556.000000,56375.000000,5.822105)}
{pt3dadd(194400.000000,155376.000000,56350.000000,5.822105)}
{pt3dadd(194400.000000,155076.000000,56400.000000,10.144211)}
{pt3dadd(194424.000000,154800.000000,56625.000000,5.822105)}
{pt3dadd(194448.000000,154488.000000,56450.000000,5.822105)}
{pt3dadd(194460.000000,154248.000000,56600.000000,5.822105)}
{pt3dadd(194484.000000,154044.000000,56650.000000,9.959327)}
{pt3dadd(194568.000000,153756.000000,56850.000000,5.637221)}
{pt3dadd(194544.000000,153456.000000,56950.000000,5.637221)}
{pt3dadd(194640.000000,153204.000000,57025.000000,5.637221)}
{pt3dadd(194736.000000,152892.000000,57125.000000,9.959327)}
{pt3dadd(194832.000000,152628.000000,57250.000000,5.822105)}
{pt3dadd(194844.000000,152292.000000,57375.000000,5.822105)}
{pt3dadd(194712.000000,152004.000000,57375.000000,5.822105)}
{pt3dadd(194880.000000,151704.000000,57450.000000,11.068632)}
{pt3dadd(194880.000000,151392.000000,57425.000000,6.746526)}
{pt3dadd(194820.000000,151056.000000,57425.000000,13.102358)}
{pt3dadd(194796.000000,150756.000000,57550.000000,20.789356)}
{pt3dadd(194880.000000,150420.000000,57525.000000,24.904717)}
{pt3dadd(194976.000000,150060.000000,57550.000000,39.934990)}

{create adhoc43}
{access adhoc43}
{connect adhoc43(1), adhoc42(0)}
{nseg = 1}
{strdef color color = "White"}
{pt3dclear()}
{pt3dadd(194976.000000,150060.000000,57550.000000,39.934990)}
{pt3dadd(195132.000000,149928.000000,58375.000000,20.231254)}
{pt3dadd(195156.000000,149700.000000,58650.000000,12.738752)}
{pt3dadd(195132.000000,149484.000000,58750.000000,7.961550)}
{pt3dadd(195096.000000,149268.000000,58925.000000,4.409795)}
{pt3dadd(195000.000000,149076.000000,58975.000000,4.409795)}
{pt3dadd(195000.000000,148872.000000,59050.000000,4.409795)}
{pt3dadd(195012.000000,148668.000000,59150.000000,7.961550)}
{pt3dadd(194940.000000,148440.000000,59150.000000,5.051754)}
{pt3dadd(195060.000000,148212.000000,59250.000000,5.051754)}
{pt3dadd(195036.000000,148044.000000,59250.000000,5.051754)}
{pt3dadd(195276.000000,147852.000000,59350.000000,8.449439)}
{pt3dadd(195252.000000,147660.000000,59500.000000,4.897684)}
{pt3dadd(195228.000000,147480.000000,59475.000000,4.897684)}
{pt3dadd(195192.000000,147276.000000,59450.000000,4.897684)}
{pt3dadd(195252.000000,147024.000000,59475.000000,8.687027)}
{pt3dadd(195276.000000,146808.000000,59525.000000,5.289343)}
{pt3dadd(195300.000000,146628.000000,59500.000000,5.289343)}
{pt3dadd(195360.000000,146400.000000,59650.000000,5.289343)}
{pt3dadd(195288.000000,146208.000000,59575.000000,9.611448)}
{pt3dadd(195228.000000,146028.000000,59525.000000,5.822105)}
{pt3dadd(195192.000000,145788.000000,59575.000000,11.068632)}
{pt3dadd(195156.000000,145548.000000,59775.000000,15.390737)}
{pt3dadd(195024.000000,145332.000000,59750.000000,17.447720)}
{pt3dadd(194664.000000,144792.000000,59600.000000,23.110527)}

{create adhoc44}
{access adhoc44}
{connect adhoc44(1), adhoc43(0)}
{nseg = 1}
{strdef color color = "White"}
{pt3dclear()}
{pt3dadd(194664.000000,144792.000000,59600.000000,23.110527)}
{pt3dadd(194748.000000,143172.000000,59600.000000,13.553168)}
{pt3dadd(194760.000000,142944.000000,59450.000000,8.731901)}
{pt3dadd(194688.000000,142776.000000,59350.000000,7.191199)}
{pt3dadd(194628.000000,142560.000000,59100.000000,4.281404)}
{pt3dadd(194640.000000,142344.000000,59150.000000,4.281404)}
{pt3dadd(194604.000000,142080.000000,59100.000000,4.281404)}
{pt3dadd(194532.000000,141828.000000,58975.000000,5.838924)}
{pt3dadd(194616.000000,141564.000000,59025.000000,3.057520)}
{pt3dadd(194580.000000,141360.000000,58950.000000,3.057520)}
{pt3dadd(194436.000000,141108.000000,58925.000000,3.057520)}
{pt3dadd(194340.000000,140892.000000,59050.000000,4.305454)}
{pt3dadd(194340.000000,140664.000000,58975.000000,2.747934)}
{pt3dadd(194316.000000,140448.000000,59100.000000,2.747934)}
{pt3dadd(194148.000000,140124.000000,59025.000000,2.747934)}
{pt3dadd(194052.000000,139908.000000,59100.000000,4.305454)}
{pt3dadd(193872.000000,139716.000000,59100.000000,3.057520)}
{pt3dadd(193668.000000,139476.000000,59100.000000,3.057520)}
{pt3dadd(193596.000000,139224.000000,59100.000000,3.057520)}
{pt3dadd(193380.000000,138984.000000,59100.000000,4.615041)}
{pt3dadd(193236.000000,138744.000000,59125.000000,3.057520)}
{pt3dadd(193164.000000,138564.000000,59175.000000,3.057520)}
{pt3dadd(192996.000000,138324.000000,59100.000000,3.057520)}
{pt3dadd(192888.000000,138120.000000,59050.000000,4.305454)}
{pt3dadd(192828.000000,137976.000000,59075.000000,2.747934)}
{pt3dadd(192504.000000,137664.000000,59100.000000,2.747934)}
{pt3dadd(192372.000000,137412.000000,59175.000000,2.747934)}
{pt3dadd(192372.000000,137124.000000,59225.000000,5.657729)}
{pt3dadd(192168.000000,136920.000000,59275.000000,4.409795)}
{pt3dadd(191952.000000,136608.000000,59425.000000,4.409795)}
{pt3dadd(191844.000000,136368.000000,59625.000000,4.409795)}
{pt3dadd(191604.000000,136152.000000,59750.000000,6.784625)}
{pt3dadd(191508.000000,135888.000000,60000.000000,3.874829)}
{pt3dadd(191232.000000,135660.000000,60475.000000,3.874829)}
{pt3dadd(191292.000000,135360.000000,60700.000000,3.874829)}
{pt3dadd(191388.000000,135156.000000,61175.000000,7.426584)}
{pt3dadd(191388.000000,134868.000000,61200.000000,7.319591)}
{pt3dadd(191352.000000,134676.000000,61275.000000,11.199318)}
{pt3dadd(191316.000000,134460.000000,61275.000000,12.839182)}

{create adhoc45}
{access adhoc45}
{connect adhoc45(1), adhoc44(0)}
{nseg = 1}
{strdef color color = "White"}
{pt3dclear()}
{pt3dadd(191316.000000,134460.000000,61275.000000,12.839182)}
{pt3dadd(191220.000000,134196.000000,61225.000000,8.494768)}
{pt3dadd(191352.000000,133944.000000,61225.000000,5.696861)}
{pt3dadd(191376.000000,133728.000000,61275.000000,4.986545)}
{pt3dadd(191496.000000,133500.000000,61325.000000,3.057520)}
{pt3dadd(191496.000000,133332.000000,61350.000000,3.057520)}
{pt3dadd(191556.000000,133128.000000,61475.000000,3.057520)}
{pt3dadd(191604.000000,132912.000000,61525.000000,5.432350)}
{pt3dadd(191628.000000,132732.000000,61575.000000,3.874829)}
{pt3dadd(191604.000000,132492.000000,61650.000000,3.874829)}
{pt3dadd(191736.000000,132264.000000,61900.000000,3.874829)}
{pt3dadd(192312.000000,130908.000000,61900.000000,5.803854)}
{pt3dadd(192360.000000,130740.000000,62000.000000,3.429025)}
{pt3dadd(192372.000000,130524.000000,62275.000000,3.429025)}
{pt3dadd(192432.000000,130320.000000,62225.000000,3.429025)}
{pt3dadd(192456.000000,130128.000000,62350.000000,5.803854)}
{pt3dadd(192480.000000,129960.000000,62325.000000,3.874829)}
{pt3dadd(192492.000000,129672.000000,62600.000000,3.874829)}
{pt3dadd(192468.000000,129432.000000,62825.000000,3.874829)}
{pt3dadd(192588.000000,129192.000000,63100.000000,5.714693)}
{pt3dadd(192612.000000,128964.000000,63475.000000,3.339864)}
{pt3dadd(192648.000000,128856.000000,63675.000000,3.339864)}
{pt3dadd(192660.000000,128700.000000,63875.000000,3.339864)}
{pt3dadd(192600.000000,128508.000000,64000.000000,5.607700)}
{pt3dadd(192528.000000,128292.000000,64100.000000,3.767836)}
{pt3dadd(192504.000000,128100.000000,64200.000000,3.767836)}
{pt3dadd(192360.000000,127884.000000,64400.000000,3.767836)}
{pt3dadd(192252.000000,127656.000000,64475.000000,5.696861)}
{pt3dadd(192216.000000,127476.000000,64700.000000,3.429025)}
{pt3dadd(192228.000000,127272.000000,64950.000000,4.986545)}
{pt3dadd(192168.000000,127032.000000,65375.000000,6.544065)}
{pt3dadd(192252.000000,126852.000000,65525.000000,6.691735)}
{pt3dadd(192324.000000,126696.000000,65650.000000,9.287602)}

{create adhoc46}
{access adhoc46}
{connect adhoc46(1), adhoc44(0)}
{nseg = 1}
{strdef color color = "White"}
{pt3dclear()}
{pt3dadd(191316.000000,134460.000000,61275.000000,12.839182)}
{pt3dadd(190776.000000,134484.000000,61925.000000,7.875595)}
{pt3dadd(190560.000000,134664.000000,62250.000000,5.325357)}
{pt3dadd(190188.000000,134796.000000,62425.000000,4.305454)}
{pt3dadd(189936.000000,134952.000000,62525.000000,2.747934)}
{pt3dadd(189696.000000,135012.000000,62600.000000,2.747934)}
{pt3dadd(189552.000000,135096.000000,62700.000000,2.747934)}
{pt3dadd(189180.000000,135372.000000,62875.000000,3.995868)}
{pt3dadd(188976.000000,135264.000000,63275.000000,2.747934)}
{pt3dadd(188784.000000,135276.000000,63275.000000,3.522888)}
{pt3dadd(188568.000000,135276.000000,63275.000000,4.118683)}
{pt3dadd(188136.000000,135168.000000,63250.000000,3.784582)}
{pt3dadd(187944.000000,135324.000000,63325.000000,4.478975)}

{create adhoc47}
{access adhoc47}
{connect adhoc47(1), adhoc43(0)}
{nseg = 1}
{strdef color color = "White"}
{pt3dclear()}
{pt3dadd(194664.000000,144792.000000,59600.000000,23.110527)}
{pt3dadd(193512.000000,144168.000000,59800.000000,11.918550)}
{pt3dadd(193344.000000,143964.000000,59725.000000,7.751130)}
{pt3dadd(193128.000000,143760.000000,59450.000000,4.986545)}
{pt3dadd(192912.000000,143664.000000,59425.000000,3.057520)}
{pt3dadd(192672.000000,143460.000000,59400.000000,3.057520)}
{pt3dadd(192372.000000,143244.000000,59375.000000,3.057520)}
{pt3dadd(192108.000000,143004.000000,59325.000000,4.897384)}
{pt3dadd(191880.000000,142932.000000,59325.000000,3.339864)}
{pt3dadd(191580.000000,142944.000000,59450.000000,3.339864)}
{pt3dadd(191388.000000,142992.000000,59525.000000,3.339864)}
{pt3dadd(191196.000000,143052.000000,59575.000000,4.587797)}
{pt3dadd(191004.000000,143112.000000,59625.000000,2.747934)}
{pt3dadd(190560.000000,143616.000000,59725.000000,2.747934)}
{pt3dadd(190428.000000,143808.000000,59775.000000,2.747934)}
{pt3dadd(190332.000000,144024.000000,59800.000000,4.305454)}
{pt3dadd(190296.000000,144192.000000,59800.000000,3.057520)}
{pt3dadd(190536.000000,144540.000000,60000.000000,3.057520)}
{pt3dadd(190560.000000,144936.000000,60250.000000,3.057520)}
{pt3dadd(190620.000000,145104.000000,60250.000000,4.986545)}
{pt3dadd(190632.000000,145332.000000,60350.000000,3.429025)}
{pt3dadd(190692.000000,145476.000000,60475.000000,3.429025)}
{pt3dadd(190704.000000,145728.000000,60575.000000,3.429025)}
{pt3dadd(190752.000000,145908.000000,60700.000000,5.358049)}
{pt3dadd(190800.000000,146136.000000,60975.000000,3.429025)}
{pt3dadd(190812.000000,146364.000000,61175.000000,3.429025)}
{pt3dadd(190860.000000,146592.000000,61350.000000,3.429025)}
{pt3dadd(190956.000000,146748.000000,61550.000000,5.358049)}
{pt3dadd(191004.000000,146928.000000,61650.000000,3.429025)}
{pt3dadd(191124.000000,147156.000000,61850.000000,3.429025)}
{pt3dadd(191208.000000,147360.000000,61975.000000,3.429025)}
{pt3dadd(191232.000000,147588.000000,62175.000000,5.803854)}
{pt3dadd(191436.000000,147792.000000,62375.000000,3.874829)}
{pt3dadd(191520.000000,147972.000000,62700.000000,3.874829)}
{pt3dadd(191604.000000,148248.000000,63100.000000,3.874829)}
{pt3dadd(191472.000000,148416.000000,63725.000000,5.803854)}
{pt3dadd(191580.000000,148500.000000,64075.000000,3.429025)}
{pt3dadd(191640.000000,148524.000000,64425.000000,3.429025)}
{pt3dadd(191832.000000,148644.000000,64750.000000,3.429025)}
{pt3dadd(191844.000000,148848.000000,65075.000000,4.986545)}
{pt3dadd(192012.000000,148932.000000,65325.000000,3.057520)}
{pt3dadd(192216.000000,149100.000000,65700.000000,3.653315)}
{pt3dadd(192456.000000,149460.000000,66125.000000,4.099811)}
{pt3dadd(192696.000000,149760.000000,66050.000000,3.237152)}
{pt3dadd(192864.000000,150000.000000,65975.000000,3.732480)}

{create adhoc48}
{access adhoc48}
{connect adhoc48(1), adhoc42(0)}
{nseg = 1}
{strdef color color = "White"}
{pt3dclear()}
{pt3dadd(194976.000000,150060.000000,57550.000000,39.934990)}
{pt3dadd(195012.000000,149412.000000,56875.000000,20.231254)}
{pt3dadd(194952.000000,149208.000000,56800.000000,12.738752)}
{pt3dadd(194964.000000,149016.000000,56825.000000,9.373860)}
{pt3dadd(195084.000000,148752.000000,56800.000000,5.822105)}
{pt3dadd(195216.000000,148512.000000,56775.000000,5.822105)}
{pt3dadd(195120.000000,148356.000000,56475.000000,5.822105)}
{pt3dadd(195084.000000,148116.000000,56375.000000,8.196935)}
{pt3dadd(195012.000000,147840.000000,56450.000000,3.874829)}
{pt3dadd(194832.000000,147540.000000,56275.000000,3.874829)}
{pt3dadd(194688.000000,147228.000000,56200.000000,8.196935)}
{pt3dadd(194616.000000,146988.000000,56150.000000,12.519040)}
{pt3dadd(194640.000000,146760.000000,56275.000000,15.907018)}
{pt3dadd(194568.000000,146496.000000,56100.000000,23.110527)}

{create adhoc49}
{access adhoc49}
{connect adhoc49(1), adhoc48(0)}
{nseg = 1}
{strdef color color = "White"}
{pt3dclear()}
{pt3dadd(194568.000000,146496.000000,56100.000000,23.110527)}
{pt3dadd(193404.000000,146628.000000,55825.000000,10.353417)}
{pt3dadd(193236.000000,146532.000000,55900.000000,6.812050)}
{pt3dadd(193056.000000,146628.000000,56025.000000,3.479890)}
{pt3dadd(192876.000000,146628.000000,56200.000000,4.418969)}
{pt3dadd(192660.000000,146628.000000,55950.000000,5.014764)}
{pt3dadd(192636.000000,146304.000000,55600.000000,7.357941)}
{pt3dadd(192576.000000,145944.000000,55225.000000,4.478975)}

{create adhoc50}
{access adhoc50}
{connect adhoc50(1), adhoc48(0)}
{nseg = 1}
{strdef color color = "White"}
{pt3dclear()}
{pt3dadd(194568.000000,146496.000000,56100.000000,23.110527)}
{pt3dadd(194580.000000,146256.000000,56125.000000,15.907018)}
{pt3dadd(194712.000000,145980.000000,56175.000000,10.144211)}
{pt3dadd(194724.000000,145716.000000,56075.000000,11.068632)}
{pt3dadd(194700.000000,145404.000000,56100.000000,6.746526)}
{pt3dadd(194724.000000,145164.000000,56150.000000,6.746526)}
{pt3dadd(194616.000000,144888.000000,56250.000000,6.746526)}
{pt3dadd(194676.000000,144576.000000,56300.000000,11.993053)}
{pt3dadd(194532.000000,144324.000000,56275.000000,6.746526)}
{pt3dadd(194400.000000,144012.000000,56275.000000,6.746526)}
{pt3dadd(194424.000000,143712.000000,56300.000000,6.746526)}
{pt3dadd(194388.000000,143496.000000,56450.000000,11.068632)}
{pt3dadd(194328.000000,143172.000000,56350.000000,5.822105)}
{pt3dadd(194388.000000,142920.000000,56550.000000,5.822105)}
{pt3dadd(194412.000000,142716.000000,56575.000000,5.822105)}
{pt3dadd(194424.000000,142416.000000,56600.000000,9.373860)}
{pt3dadd(194328.000000,142080.000000,56700.000000,5.051754)}
{pt3dadd(194424.000000,141696.000000,56750.000000,5.051754)}
{pt3dadd(194352.000000,141288.000000,56725.000000,5.051754)}
{pt3dadd(194292.000000,140964.000000,56875.000000,8.603509)}
{pt3dadd(194268.000000,140628.000000,56975.000000,5.051754)}
{pt3dadd(194268.000000,140400.000000,57100.000000,5.051754)}
{pt3dadd(194316.000000,140100.000000,57050.000000,5.051754)}
{pt3dadd(194220.000000,139812.000000,57100.000000,7.426584)}
{pt3dadd(194040.000000,139500.000000,57150.000000,3.874829)}
{pt3dadd(194196.000000,139236.000000,57375.000000,3.874829)}
{pt3dadd(194100.000000,138948.000000,57625.000000,3.874829)}
{pt3dadd(194196.000000,138660.000000,57675.000000,8.899495)}
{pt3dadd(194136.000000,138336.000000,57725.000000,6.524665)}
{pt3dadd(194220.000000,138024.000000,57750.000000,6.524665)}
{pt3dadd(194304.000000,137712.000000,57975.000000,6.524665)}
{pt3dadd(194352.000000,137424.000000,57900.000000,11.771192)}
{pt3dadd(194328.000000,137100.000000,58000.000000,6.746526)}
{pt3dadd(194424.000000,136788.000000,58000.000000,6.746526)}
{pt3dadd(194400.000000,136524.000000,58050.000000,6.746526)}
{pt3dadd(194424.000000,136248.000000,58400.000000,13.102358)}
{pt3dadd(194400.000000,135936.000000,58325.000000,14.211664)}
{pt3dadd(194460.000000,135684.000000,58550.000000,19.458190)}
{pt3dadd(194352.000000,135432.000000,58575.000000,31.430317)}
{pt3dadd(194352.000000,135156.000000,58750.000000,27.732632)}

{create adhoc51}
{access adhoc51}
{connect adhoc51(1), adhoc50(0)}
{nseg = 1}
{strdef color color = "White"}
{pt3dclear()}
{pt3dadd(194352.000000,135156.000000,58750.000000,27.732632)}
{pt3dadd(193716.000000,134808.000000,57200.000000,13.459252)}
{pt3dadd(193464.000000,134400.000000,56875.000000,8.675551)}
{pt3dadd(193452.000000,134184.000000,56750.000000,4.676958)}
{pt3dadd(193272.000000,133920.000000,56800.000000,2.747934)}
{pt3dadd(192984.000000,133668.000000,56650.000000,2.747934)}
{pt3dadd(192744.000000,132924.000000,56525.000000,2.747934)}
{pt3dadd(192624.000000,132684.000000,56225.000000,4.305454)}
{pt3dadd(192564.000000,132516.000000,56200.000000,4.986545)}
{pt3dadd(192252.000000,132336.000000,56300.000000,6.915570)}
{pt3dadd(192156.000000,132120.000000,56275.000000,10.525949)}
{pt3dadd(192084.000000,131892.000000,56325.000000,11.145123)}

{create adhoc52}
{access adhoc52}
{connect adhoc52(1), adhoc51(0)}
{nseg = 1}
{strdef color color = "White"}
{pt3dclear()}
{pt3dadd(192084.000000,131892.000000,56325.000000,11.145123)}
{pt3dadd(191880.000000,131004.000000,56250.000000,6.364949)}
{pt3dadd(191688.000000,129312.000000,56500.000000,4.418969)}
{pt3dadd(191100.000000,127476.000000,56500.000000,3.737879)}
{pt3dadd(190968.000000,127248.000000,56525.000000,2.747934)}
{pt3dadd(190908.000000,126984.000000,56575.000000,2.747934)}
{pt3dadd(190836.000000,126804.000000,56550.000000,2.747934)}
{pt3dadd(190476.000000,125772.000000,56550.000000,4.676958)}
{pt3dadd(190284.000000,125544.000000,56550.000000,3.429025)}
{pt3dadd(190224.000000,125340.000000,56600.000000,3.429025)}
{pt3dadd(189972.000000,125208.000000,56900.000000,3.429025)}
{pt3dadd(189936.000000,124740.000000,57225.000000,4.986545)}
{pt3dadd(189612.000000,124368.000000,57575.000000,4.305454)}
{pt3dadd(189432.000000,124128.000000,57700.000000,4.751950)}
{pt3dadd(189396.000000,123876.000000,57800.000000,6.919917)}
{pt3dadd(189408.000000,123840.000000,58025.000000,3.732480)}

{create adhoc53}
{access adhoc53}
{connect adhoc53(1), adhoc51(0)}
{nseg = 1}
{strdef color color = "White"}
{pt3dclear()}
{pt3dadd(192084.000000,131892.000000,56325.000000,11.145123)}
{pt3dadd(190980.000000,131484.000000,56250.000000,6.006631)}
{pt3dadd(190212.000000,131172.000000,56250.000000,4.203979)}
{pt3dadd(190020.000000,131076.000000,56100.000000,3.049908)}
{pt3dadd(189792.000000,131052.000000,56075.000000,2.721450)}
{pt3dadd(189552.000000,130848.000000,56000.000000,2.939850)}
{pt3dadd(189336.000000,130908.000000,55950.000000,3.899750)}
{pt3dadd(188496.000000,130692.000000,55625.000000,2.592000)}

{create adhoc54}
{access adhoc54}
{connect adhoc54(1), adhoc50(0)}
{nseg = 1}
{strdef color color = "White"}
{pt3dclear()}
{pt3dadd(194352.000000,135156.000000,58750.000000,27.732632)}
{pt3dadd(194328.000000,134928.000000,58975.000000,17.447720)}
{pt3dadd(194304.000000,134712.000000,59225.000000,11.068632)}
{pt3dadd(194280.000000,134424.000000,59425.000000,10.144211)}
{pt3dadd(194184.000000,134112.000000,59575.000000,5.822105)}
{pt3dadd(194388.000000,133848.000000,59625.000000,5.822105)}
{pt3dadd(194292.000000,133548.000000,59725.000000,5.822105)}
{pt3dadd(194256.000000,133164.000000,59850.000000,11.068632)}
{pt3dadd(194196.000000,132864.000000,59900.000000,6.746526)}
{pt3dadd(194124.000000,132576.000000,59925.000000,6.746526)}
{pt3dadd(194016.000000,132312.000000,60000.000000,6.746526)}
{pt3dadd(193920.000000,132072.000000,60125.000000,11.068632)}
{pt3dadd(193788.000000,131844.000000,60150.000000,5.822105)}
{pt3dadd(193608.000000,131520.000000,60300.000000,5.822105)}
{pt3dadd(193704.000000,131280.000000,60525.000000,5.822105)}
{pt3dadd(193608.000000,131028.000000,60575.000000,10.144211)}
{pt3dadd(193464.000000,130692.000000,60700.000000,5.822105)}
{pt3dadd(193440.000000,130428.000000,60725.000000,5.822105)}
{pt3dadd(193308.000000,130128.000000,60750.000000,5.822105)}
{pt3dadd(193320.000000,129876.000000,61000.000000,9.959327)}
{pt3dadd(193260.000000,129588.000000,60825.000000,5.637221)}
{pt3dadd(193236.000000,129324.000000,60875.000000,5.637221)}
{pt3dadd(193200.000000,129048.000000,60925.000000,5.637221)}
{pt3dadd(193224.000000,128784.000000,60975.000000,9.188976)}
{pt3dadd(193248.000000,128496.000000,60900.000000,5.051754)}
{pt3dadd(193332.000000,128232.000000,60900.000000,5.051754)}
{pt3dadd(193380.000000,127968.000000,60775.000000,5.051754)}
{pt3dadd(193356.000000,127668.000000,60850.000000,8.603509)}
{pt3dadd(193404.000000,127356.000000,60750.000000,5.051754)}
{pt3dadd(193416.000000,127032.000000,60875.000000,5.051754)}
{pt3dadd(193356.000000,126780.000000,60850.000000,5.051754)}
{pt3dadd(193368.000000,126492.000000,61025.000000,9.373860)}
{pt3dadd(193080.000000,126252.000000,61000.000000,5.822105)}
{pt3dadd(193080.000000,125952.000000,61125.000000,5.822105)}
{pt3dadd(193080.000000,125688.000000,61200.000000,5.822105)}
{pt3dadd(193020.000000,125412.000000,61350.000000,9.373860)}
{pt3dadd(193056.000000,125124.000000,61500.000000,5.051754)}
{pt3dadd(193356.000000,124836.000000,61725.000000,5.051754)}
{pt3dadd(193356.000000,124560.000000,61850.000000,5.051754)}
{pt3dadd(193320.000000,124296.000000,62125.000000,9.373860)}
{pt3dadd(193212.000000,123996.000000,62050.000000,5.822105)}
{pt3dadd(193176.000000,123636.000000,62250.000000,5.822105)}
{pt3dadd(193116.000000,123372.000000,62475.000000,5.822105)}
{pt3dadd(193056.000000,123072.000000,62600.000000,10.144211)}
{pt3dadd(193152.000000,122760.000000,62850.000000,5.822105)}
{pt3dadd(193248.000000,122424.000000,63200.000000,11.068632)}
{pt3dadd(193176.000000,122076.000000,63400.000000,17.424464)}
{pt3dadd(193224.000000,121800.000000,63900.000000,20.837264)}
{pt3dadd(193080.000000,121572.000000,63900.000000,33.279160)}

{create adhoc55}
{access adhoc55}
{connect adhoc55(1), adhoc54(0)}
{nseg = 1}
{strdef color color = "White"}
{pt3dclear()}
{pt3dadd(193080.000000,121572.000000,63900.000000,33.279160)}
{pt3dadd(193056.000000,121320.000000,64725.000000,16.942712)}
{pt3dadd(193152.000000,121116.000000,65325.000000,10.765627)}
{pt3dadd(193236.000000,120864.000000,65600.000000,8.731901)}
{pt3dadd(193380.000000,120276.000000,66075.000000,5.822105)}
{pt3dadd(193452.000000,119964.000000,66450.000000,5.822105)}
{pt3dadd(193272.000000,119868.000000,66775.000000,5.822105)}
{pt3dadd(193356.000000,119664.000000,67225.000000,8.731901)}
{pt3dadd(193320.000000,119568.000000,67650.000000,4.409795)}
{pt3dadd(193152.000000,119424.000000,68175.000000,4.409795)}
{pt3dadd(192948.000000,119256.000000,68575.000000,4.409795)}
{pt3dadd(192732.000000,119112.000000,68900.000000,7.961550)}
{pt3dadd(192456.000000,119040.000000,69350.000000,5.051754)}
{pt3dadd(192348.000000,118920.000000,69725.000000,5.051754)}
{pt3dadd(192216.000000,118512.000000,70275.000000,5.051754)}
{pt3dadd(192228.000000,117804.000000,70825.000000,8.603509)}
{pt3dadd(192240.000000,117264.000000,71175.000000,8.603509)}
{pt3dadd(192204.000000,117120.000000,71375.000000,10.978338)}
{pt3dadd(192204.000000,116916.000000,71575.000000,17.297230)}
{pt3dadd(192132.000000,116556.000000,72175.000000,13.374147)}

{create adhoc56}
{access adhoc56}
{connect adhoc56(1), adhoc55(0)}
{nseg = 1}
{strdef color color = "White"}
{pt3dclear()}
{pt3dadd(192132.000000,116556.000000,72175.000000,13.374147)}
{pt3dadd(192660.000000,116832.000000,72550.000000,9.237776)}
{pt3dadd(192684.000000,116832.000000,73000.000000,6.142666)}
{pt3dadd(192804.000000,116892.000000,73425.000000,6.677632)}
{pt3dadd(192768.000000,116940.000000,73825.000000,4.409795)}
{pt3dadd(192900.000000,116964.000000,74200.000000,4.409795)}
{pt3dadd(193128.000000,116964.000000,74500.000000,4.409795)}
{pt3dadd(193224.000000,116976.000000,74925.000000,6.784625)}
{pt3dadd(193308.000000,116880.000000,75250.000000,3.874829)}
{pt3dadd(193284.000000,116844.000000,75700.000000,3.874829)}
{pt3dadd(193404.000000,116928.000000,76150.000000,3.874829)}
{pt3dadd(193416.000000,117000.000000,76475.000000,5.803854)}
{pt3dadd(193536.000000,117084.000000,76875.000000,3.429025)}
{pt3dadd(193704.000000,117156.000000,77200.000000,3.429025)}
{pt3dadd(193632.000000,117120.000000,77550.000000,3.429025)}
{pt3dadd(193692.000000,117168.000000,77850.000000,5.358049)}
{pt3dadd(193620.000000,117108.000000,78225.000000,3.429025)}
{pt3dadd(193584.000000,116988.000000,78600.000000,3.429025)}
{pt3dadd(193584.000000,116880.000000,78900.000000,3.429025)}
{pt3dadd(193704.000000,116748.000000,79250.000000,6.980779)}
{pt3dadd(193944.000000,116616.000000,79625.000000,7.961550)}
{pt3dadd(194076.000000,116508.000000,80050.000000,12.269250)}
{pt3dadd(194100.000000,116424.000000,80375.000000,16.048977)}

{create adhoc57}
{access adhoc57}
{connect adhoc57(1), adhoc56(0)}
{nseg = 1}
{strdef color color = "White"}
{pt3dclear()}
{pt3dadd(194100.000000,116424.000000,80375.000000,16.048977)}
{pt3dadd(194328.000000,117036.000000,80575.000000,10.307708)}
{pt3dadd(194640.000000,117804.000000,80925.000000,6.784625)}
{pt3dadd(194844.000000,118008.000000,81325.000000,6.249659)}
{pt3dadd(194928.000000,118368.000000,81650.000000,3.874829)}
{pt3dadd(195156.000000,118896.000000,82000.000000,3.874829)}
{pt3dadd(195396.000000,119136.000000,82050.000000,3.874829)}
{pt3dadd(195564.000000,119580.000000,82425.000000,4.864774)}
{pt3dadd(195924.000000,120276.000000,82800.000000,2.489945)}
{pt3dadd(196068.000000,120432.000000,82950.000000,2.489945)}
{pt3dadd(196188.000000,120600.000000,83150.000000,2.489945)}
{pt3dadd(196308.000000,120768.000000,83475.000000,3.479890)}
{pt3dadd(196536.000000,121188.000000,83850.000000,2.489945)}
{pt3dadd(196500.000000,121728.000000,84200.000000,2.489945)}
{pt3dadd(196692.000000,122232.000000,84550.000000,2.489945)}
{pt3dadd(196932.000000,123000.000000,84925.000000,3.479890)}
{pt3dadd(197268.000000,123384.000000,85225.000000,2.489945)}
{pt3dadd(197580.000000,123624.000000,85525.000000,2.489945)}
{pt3dadd(197784.000000,123864.000000,85825.000000,2.489945)}
{pt3dadd(198012.000000,124512.000000,86200.000000,3.264899)}
{pt3dadd(198144.000000,124716.000000,86325.000000,2.274954)}
{pt3dadd(198240.000000,124932.000000,86350.000000,2.274954)}
{pt3dadd(198252.000000,125196.000000,86400.000000,3.049908)}
{pt3dadd(198336.000000,125388.000000,86400.000000,3.645703)}
{pt3dadd(198384.000000,125592.000000,86525.000000,3.784582)}
{pt3dadd(198432.000000,125880.000000,86650.000000,4.478975)}

{create adhoc58}
{access adhoc58}
{connect adhoc58(1), adhoc56(0)}
{nseg = 1}
{strdef color color = "White"}
{pt3dclear()}
{pt3dadd(194100.000000,116424.000000,80375.000000,16.048977)}
{pt3dadd(193860.000000,115212.000000,80475.000000,8.945526)}
{pt3dadd(193644.000000,114924.000000,80575.000000,5.967316)}
{pt3dadd(193584.000000,114708.000000,80700.000000,3.832474)}
{pt3dadd(193332.000000,114408.000000,80675.000000,2.274954)}
{pt3dadd(193380.000000,114252.000000,80800.000000,2.274954)}
{pt3dadd(193092.000000,113544.000000,81125.000000,2.274954)}
{pt3dadd(192996.000000,113316.000000,81250.000000,3.049908)}
{pt3dadd(192888.000000,113076.000000,81450.000000,2.274954)}
{pt3dadd(192912.000000,112836.000000,81600.000000,2.274954)}
{pt3dadd(192912.000000,112644.000000,81675.000000,2.274954)}
{pt3dadd(192564.000000,111996.000000,81775.000000,3.264899)}
{pt3dadd(192372.000000,111804.000000,81875.000000,2.489945)}
{pt3dadd(192264.000000,111564.000000,82000.000000,2.489945)}
{pt3dadd(192168.000000,111360.000000,82275.000000,2.489945)}
{pt3dadd(191964.000000,111120.000000,82425.000000,4.418969)}
{pt3dadd(191940.000000,110940.000000,82475.000000,3.429025)}
{pt3dadd(191808.000000,110712.000000,82475.000000,3.429025)}
{pt3dadd(191772.000000,110472.000000,82575.000000,3.429025)}
{pt3dadd(191796.000000,110304.000000,82675.000000,4.418969)}
{pt3dadd(191652.000000,110160.000000,82550.000000,2.489945)}
{pt3dadd(191448.000000,109920.000000,82575.000000,2.489945)}
{pt3dadd(191388.000000,109728.000000,82625.000000,3.479890)}
{pt3dadd(191292.000000,109512.000000,82750.000000,4.075685)}
{pt3dadd(191256.000000,109272.000000,82800.000000,4.142900)}
{pt3dadd(191256.000000,109104.000000,83000.000000,4.478975)}

{create adhoc59}
{access adhoc59}
{connect adhoc59(1), adhoc55(0)}
{nseg = 1}
{strdef color color = "White"}
{pt3dclear()}
{pt3dadd(192132.000000,116556.000000,72175.000000,13.374147)}
{pt3dadd(191784.000000,115104.000000,72150.000000,8.673090)}
{pt3dadd(191724.000000,114876.000000,72225.000000,5.803854)}
{pt3dadd(191664.000000,114588.000000,72525.000000,5.803854)}
{pt3dadd(191676.000000,114264.000000,72625.000000,3.874829)}
{pt3dadd(191652.000000,114000.000000,72675.000000,3.874829)}
{pt3dadd(191520.000000,113784.000000,72725.000000,3.874829)}
{pt3dadd(191448.000000,113544.000000,72625.000000,5.803854)}
{pt3dadd(191244.000000,113268.000000,72625.000000,3.429025)}
{pt3dadd(191040.000000,112932.000000,72625.000000,3.429025)}
{pt3dadd(190896.000000,112632.000000,72525.000000,3.429025)}
{pt3dadd(190644.000000,112404.000000,72450.000000,6.338820)}
{pt3dadd(190500.000000,112212.000000,72500.000000,4.409795)}
{pt3dadd(190392.000000,112020.000000,72450.000000,4.409795)}
{pt3dadd(190140.000000,111816.000000,72400.000000,4.409795)}
{pt3dadd(189900.000000,111564.000000,72400.000000,7.961550)}
{pt3dadd(189864.000000,111324.000000,72325.000000,5.051754)}
{pt3dadd(189612.000000,111012.000000,72400.000000,5.051754)}
{pt3dadd(189516.000000,110760.000000,72325.000000,5.051754)}
{pt3dadd(189456.000000,110508.000000,72300.000000,8.603509)}
{pt3dadd(189348.000000,110256.000000,72300.000000,5.051754)}
{pt3dadd(189216.000000,109992.000000,72175.000000,5.051754)}
{pt3dadd(189144.000000,109704.000000,72200.000000,5.051754)}
{pt3dadd(188964.000000,109416.000000,72175.000000,7.833158)}
{pt3dadd(188796.000000,109140.000000,72100.000000,4.281404)}
{pt3dadd(188628.000000,108852.000000,72150.000000,4.281404)}
{pt3dadd(188484.000000,108552.000000,72150.000000,4.281404)}
{pt3dadd(188304.000000,108288.000000,72150.000000,6.549240)}
{pt3dadd(188124.000000,108036.000000,72125.000000,3.767836)}
{pt3dadd(188016.000000,107832.000000,72225.000000,3.767836)}
{pt3dadd(187872.000000,107580.000000,72075.000000,3.767836)}
{pt3dadd(187692.000000,107376.000000,72050.000000,5.696861)}
{pt3dadd(187668.000000,107124.000000,71875.000000,3.429025)}
{pt3dadd(187608.000000,106884.000000,71800.000000,3.429025)}
{pt3dadd(187572.000000,106644.000000,71925.000000,3.429025)}
{pt3dadd(187404.000000,106440.000000,71850.000000,5.358049)}
{pt3dadd(187380.000000,106164.000000,71850.000000,4.912244)}
{pt3dadd(187200.000000,105804.000000,71875.000000,7.187074)}
{pt3dadd(187128.000000,105720.000000,71875.000000,8.916098)}

{create adhoc60}
{access adhoc60}
{connect adhoc60(1), adhoc59(0)}
{nseg = 1}
{strdef color color = "White"}
{pt3dclear()}
{pt3dadd(187128.000000,105720.000000,71875.000000,8.916098)}
{pt3dadd(186996.000000,105456.000000,71750.000000,7.038472)}
{pt3dadd(186816.000000,105192.000000,71675.000000,4.823083)}
{pt3dadd(186636.000000,104952.000000,71625.000000,4.897384)}
{pt3dadd(186564.000000,104724.000000,71775.000000,3.057520)}
{pt3dadd(186396.000000,104496.000000,71775.000000,3.057520)}
{pt3dadd(186408.000000,104292.000000,71775.000000,3.057520)}
{pt3dadd(186228.000000,104076.000000,71825.000000,4.986545)}
{pt3dadd(186096.000000,103824.000000,71825.000000,3.429025)}
{pt3dadd(185928.000000,103608.000000,71825.000000,3.429025)}
{pt3dadd(185796.000000,103308.000000,71825.000000,3.429025)}
{pt3dadd(185580.000000,103116.000000,71950.000000,5.358049)}
{pt3dadd(185592.000000,102876.000000,72050.000000,3.429025)}
{pt3dadd(185460.000000,102624.000000,72100.000000,3.429025)}
{pt3dadd(185184.000000,102396.000000,72050.000000,3.429025)}
{pt3dadd(185040.000000,102180.000000,72075.000000,4.676958)}
{pt3dadd(184680.000000,101892.000000,72100.000000,2.747934)}
{pt3dadd(184536.000000,101676.000000,72075.000000,2.747934)}
{pt3dadd(184260.000000,101424.000000,72050.000000,2.747934)}
{pt3dadd(184152.000000,101220.000000,72100.000000,4.305454)}
{pt3dadd(184008.000000,101040.000000,72025.000000,3.057520)}
{pt3dadd(183912.000000,100824.000000,72050.000000,3.057520)}
{pt3dadd(183780.000000,100608.000000,72000.000000,3.057520)}
{pt3dadd(183612.000000,100380.000000,72025.000000,4.615041)}
{pt3dadd(183432.000000,100248.000000,72075.000000,3.057520)}
{pt3dadd(183432.000000,100032.000000,72125.000000,3.057520)}
{pt3dadd(183324.000000,99804.000000,72175.000000,3.057520)}
{pt3dadd(183072.000000,99588.000000,72225.000000,4.047465)}
{pt3dadd(182820.000000,99360.000000,72325.000000,2.489945)}
{pt3dadd(182508.000000,99204.000000,72500.000000,2.489945)}
{pt3dadd(182292.000000,99048.000000,72575.000000,2.489945)}
{pt3dadd(181860.000000,98772.000000,72700.000000,3.479890)}
{pt3dadd(181656.000000,98568.000000,72825.000000,4.047465)}
{pt3dadd(181368.000000,98340.000000,72850.000000,5.745775)}
{pt3dadd(181224.000000,98100.000000,72850.000000,9.287602)}

{create adhoc61}
{access adhoc61}
{connect adhoc61(1), adhoc60(0)}
{nseg = 1}
{strdef color color = "White"}
{pt3dclear()}
{pt3dadd(181224.000000,98100.000000,72850.000000,9.287602)}
{pt3dadd(181200.000000,97908.000000,73175.000000,13.581199)}
{pt3dadd(181176.000000,97716.000000,73200.000000,12.635240)}
{pt3dadd(181380.000000,97800.000000,73575.000000,6.449724)}

{create adhoc62}
{access adhoc62}
{connect adhoc62(1), adhoc60(0)}
{nseg = 1}
{strdef color color = "White"}
{pt3dclear()}
{pt3dadd(181224.000000,98100.000000,72850.000000,9.287602)}
{pt3dadd(179568.000000,98064.000000,73000.000000,5.387457)}
{pt3dadd(179316.000000,98124.000000,73000.000000,3.832474)}
{pt3dadd(178728.000000,97956.000000,72975.000000,3.264899)}
{pt3dadd(177732.000000,97884.000000,72675.000000,2.489945)}
{pt3dadd(177264.000000,97896.000000,72375.000000,2.489945)}
{pt3dadd(177048.000000,97896.000000,72200.000000,2.489945)}
{pt3dadd(176580.000000,97956.000000,71650.000000,3.264899)}
{pt3dadd(175968.000000,97716.000000,71025.000000,2.274954)}
{pt3dadd(175560.000000,97608.000000,70625.000000,2.274954)}
{pt3dadd(174504.000000,96960.000000,70250.000000,2.274954)}
{pt3dadd(173364.000000,95976.000000,70250.000000,2.721450)}
{pt3dadd(172920.000000,95280.000000,69675.000000,2.472061)}
{pt3dadd(172572.000000,94908.000000,69275.000000,3.120101)}
{pt3dadd(172260.000000,94440.000000,68900.000000,4.127824)}

{create adhoc63}
{access adhoc63}
{connect adhoc63(1), adhoc59(0)}
{nseg = 1}
{strdef color color = "White"}
{pt3dclear()}
{pt3dadd(187128.000000,105720.000000,71875.000000,8.916098)}
{pt3dadd(187488.000000,105684.000000,72475.000000,5.263623)}
{pt3dadd(187536.000000,105588.000000,72750.000000,3.758174)}
{pt3dadd(187668.000000,105516.000000,73175.000000,3.049908)}
{pt3dadd(187716.000000,105564.000000,73550.000000,2.274954)}
{pt3dadd(187764.000000,105624.000000,73925.000000,2.274954)}
{pt3dadd(187848.000000,105636.000000,74475.000000,3.264899)}
{pt3dadd(188220.000000,105480.000000,74825.000000,4.039853)}
{pt3dadd(188556.000000,105204.000000,75175.000000,4.441498)}
{pt3dadd(188700.000000,105180.000000,75150.000000,5.374770)}

{create adhoc64}
{access adhoc64}
{connect adhoc64(1), adhoc54(0)}
{nseg = 1}
{strdef color color = "White"}
{pt3dclear()}
{pt3dadd(193080.000000,121572.000000,63900.000000,33.279160)}
{pt3dadd(192876.000000,120768.000000,63550.000000,16.051102)}
{pt3dadd(192696.000000,120516.000000,63600.000000,10.230661)}
{pt3dadd(192492.000000,120288.000000,63200.000000,7.426584)}
{pt3dadd(192432.000000,120084.000000,63375.000000,5.051754)}
{pt3dadd(192300.000000,119808.000000,63350.000000,5.051754)}
{pt3dadd(192240.000000,119520.000000,63350.000000,5.051754)}
{pt3dadd(192144.000000,119268.000000,63450.000000,9.373860)}
{pt3dadd(192000.000000,118992.000000,63475.000000,5.822105)}
{pt3dadd(191832.000000,118632.000000,63450.000000,8.731901)}
{pt3dadd(191652.000000,118272.000000,63475.000000,11.106730)}
{pt3dadd(191448.000000,117948.000000,63525.000000,10.307708)}
{pt3dadd(191268.000000,117624.000000,63450.000000,13.374147)}

{create adhoc65}
{access adhoc65}
{connect adhoc65(1), adhoc64(0)}
{nseg = 1}
{strdef color color = "White"}
{pt3dclear()}
{pt3dadd(191268.000000,117624.000000,63450.000000,13.374147)}
{pt3dadd(191580.000000,117588.000000,63800.000000,8.673090)}
{pt3dadd(191592.000000,117420.000000,63925.000000,5.803854)}
{pt3dadd(191388.000000,117108.000000,64050.000000,5.803854)}
{pt3dadd(191292.000000,116880.000000,64125.000000,3.874829)}
{pt3dadd(191112.000000,116676.000000,64325.000000,3.874829)}
{pt3dadd(190968.000000,116412.000000,64525.000000,3.874829)}
{pt3dadd(190752.000000,116160.000000,64650.000000,6.249659)}
{pt3dadd(190644.000000,115884.000000,64875.000000,3.874829)}
{pt3dadd(190536.000000,115620.000000,65000.000000,3.874829)}
{pt3dadd(190584.000000,115368.000000,65125.000000,3.874829)}
{pt3dadd(190452.000000,115080.000000,65400.000000,5.432350)}
{pt3dadd(190428.000000,114888.000000,65525.000000,3.057520)}
{pt3dadd(190188.000000,114672.000000,65450.000000,3.057520)}
{pt3dadd(189864.000000,114492.000000,65600.000000,3.057520)}
{pt3dadd(189504.000000,114240.000000,65775.000000,5.967316)}
{pt3dadd(189144.000000,114000.000000,65825.000000,4.409795)}
{pt3dadd(188856.000000,113724.000000,65950.000000,4.409795)}
{pt3dadd(189156.000000,113256.000000,66250.000000,4.409795)}
{pt3dadd(189012.000000,113088.000000,66250.000000,6.784625)}
{pt3dadd(188472.000000,112812.000000,66525.000000,3.874829)}
{pt3dadd(188124.000000,112548.000000,66575.000000,3.874829)}
{pt3dadd(187956.000000,112380.000000,66700.000000,3.874829)}
{pt3dadd(187680.000000,112164.000000,66800.000000,5.803854)}
{pt3dadd(187644.000000,111948.000000,66750.000000,3.429025)}
{pt3dadd(187476.000000,111720.000000,66850.000000,3.429025)}
{pt3dadd(187008.000000,111504.000000,66825.000000,3.429025)}
{pt3dadd(186804.000000,111348.000000,66875.000000,5.358049)}
{pt3dadd(186708.000000,111180.000000,67075.000000,3.429025)}
{pt3dadd(186540.000000,110952.000000,67125.000000,3.429025)}
{pt3dadd(186336.000000,110772.000000,67125.000000,3.429025)}
{pt3dadd(186132.000000,110592.000000,67150.000000,5.268888)}
{pt3dadd(185952.000000,110412.000000,67125.000000,3.339864)}
{pt3dadd(185244.000000,109464.000000,67175.000000,3.339864)}
{pt3dadd(184992.000000,109308.000000,67025.000000,3.339864)}
{pt3dadd(184788.000000,109116.000000,66925.000000,5.268888)}
{pt3dadd(184752.000000,108900.000000,66850.000000,3.429025)}
{pt3dadd(184608.000000,108732.000000,66875.000000,3.429025)}
{pt3dadd(184560.000000,107844.000000,66650.000000,3.429025)}
{pt3dadd(184416.000000,106932.000000,66650.000000,4.676958)}
{pt3dadd(184368.000000,106692.000000,66700.000000,2.747934)}
{pt3dadd(184344.000000,106476.000000,66675.000000,2.747934)}
{pt3dadd(184272.000000,105840.000000,66875.000000,2.747934)}
{pt3dadd(184284.000000,105612.000000,67000.000000,5.015770)}
{pt3dadd(184344.000000,105408.000000,67000.000000,3.767836)}
{pt3dadd(184272.000000,105180.000000,66975.000000,3.767836)}
{pt3dadd(184236.000000,105000.000000,66975.000000,3.767836)}
{pt3dadd(184260.000000,104796.000000,67025.000000,5.251056)}
{pt3dadd(184344.000000,104568.000000,67125.000000,2.983220)}
{pt3dadd(184248.000000,104340.000000,67150.000000,2.983220)}
{pt3dadd(184152.000000,104124.000000,67125.000000,2.983220)}
{pt3dadd(184176.000000,103884.000000,67200.000000,4.912244)}
{pt3dadd(184152.000000,103656.000000,67225.000000,3.429025)}
{pt3dadd(184116.000000,103416.000000,67225.000000,3.429025)}
{pt3dadd(183972.000000,103176.000000,67350.000000,3.429025)}
{pt3dadd(183864.000000,102216.000000,67325.000000,6.338820)}
{pt3dadd(183948.000000,102036.000000,67525.000000,4.409795)}
{pt3dadd(183948.000000,101832.000000,67625.000000,4.409795)}
{pt3dadd(183924.000000,101628.000000,67675.000000,4.409795)}
{pt3dadd(184008.000000,101376.000000,67500.000000,6.784625)}
{pt3dadd(184020.000000,101172.000000,67550.000000,3.874829)}
{pt3dadd(184068.000000,100908.000000,67675.000000,3.874829)}
{pt3dadd(183972.000000,100668.000000,67825.000000,3.874829)}
{pt3dadd(183984.000000,100548.000000,68225.000000,4.649783)}
{pt3dadd(183876.000000,100368.000000,68275.000000,2.274954)}
{pt3dadd(183624.000000,100128.000000,68475.000000,2.274954)}
{pt3dadd(183588.000000,99876.000000,68700.000000,2.274954)}
{pt3dadd(183492.000000,99660.000000,68725.000000,3.832474)}
{pt3dadd(183492.000000,99432.000000,68850.000000,3.057520)}
{pt3dadd(183360.000000,99192.000000,68975.000000,3.057520)}
{pt3dadd(183192.000000,98904.000000,68900.000000,3.057520)}
{pt3dadd(183024.000000,98676.000000,68800.000000,4.047465)}
{pt3dadd(182808.000000,98460.000000,68750.000000,2.489945)}
{pt3dadd(182484.000000,97992.000000,68550.000000,2.489945)}
{pt3dadd(182316.000000,97824.000000,68500.000000,2.489945)}
{pt3dadd(182184.000000,97596.000000,68500.000000,3.479890)}
{pt3dadd(181536.000000,96516.000000,68375.000000,2.489945)}
{pt3dadd(181476.000000,96336.000000,68425.000000,3.085740)}
{pt3dadd(181260.000000,96108.000000,68525.000000,3.681535)}
{pt3dadd(181152.000000,95856.000000,68525.000000,3.485983)}
{pt3dadd(181152.000000,95796.000000,68550.000000,4.478975)}

{create adhoc66}
{access adhoc66}
{connect adhoc66(1), adhoc64(0)}
{nseg = 1}
{strdef color color = "White"}
{pt3dclear()}
{pt3dadd(191268.000000,117624.000000,63450.000000,13.374147)}
{pt3dadd(190824.000000,117468.000000,63075.000000,8.053916)}
{pt3dadd(190428.000000,117192.000000,62875.000000,5.432350)}
{pt3dadd(190164.000000,117048.000000,62800.000000,4.615041)}
{pt3dadd(189936.000000,116904.000000,62725.000000,3.057520)}
{pt3dadd(189672.000000,116700.000000,62725.000000,3.057520)}
{pt3dadd(189456.000000,116628.000000,62650.000000,3.057520)}
{pt3dadd(189180.000000,116448.000000,62625.000000,4.615041)}
{pt3dadd(188988.000000,116412.000000,62550.000000,3.057520)}
{pt3dadd(188748.000000,116280.000000,62450.000000,3.057520)}
{pt3dadd(188460.000000,116004.000000,62375.000000,3.057520)}
{pt3dadd(188208.000000,115824.000000,62275.000000,5.967316)}
{pt3dadd(187884.000000,115656.000000,62125.000000,4.409795)}
{pt3dadd(187368.000000,114852.000000,61950.000000,4.409795)}
{pt3dadd(187236.000000,114660.000000,61700.000000,4.409795)}
{pt3dadd(187212.000000,114384.000000,61650.000000,6.338820)}
{pt3dadd(187044.000000,114048.000000,61575.000000,3.429025)}
{pt3dadd(186972.000000,113772.000000,61650.000000,3.429025)}
{pt3dadd(186876.000000,113496.000000,61575.000000,3.429025)}
{pt3dadd(186780.000000,113232.000000,61575.000000,4.986545)}
{pt3dadd(186744.000000,112980.000000,61525.000000,3.057520)}
{pt3dadd(186708.000000,112776.000000,61450.000000,3.057520)}
{pt3dadd(186612.000000,112512.000000,61375.000000,3.057520)}
{pt3dadd(186576.000000,112236.000000,61400.000000,4.986545)}
{pt3dadd(186336.000000,111972.000000,61450.000000,3.429025)}
{pt3dadd(186240.000000,111696.000000,61475.000000,3.429025)}
{pt3dadd(186096.000000,111396.000000,61625.000000,3.429025)}
{pt3dadd(185916.000000,111132.000000,61550.000000,5.358049)}
{pt3dadd(185820.000000,110844.000000,61550.000000,3.429025)}
{pt3dadd(185688.000000,110640.000000,61550.000000,5.268888)}
{pt3dadd(185580.000000,110400.000000,61500.000000,6.826409)}
{pt3dadd(185472.000000,110136.000000,61350.000000,7.162307)}
{pt3dadd(185376.000000,110016.000000,61375.000000,9.287602)}

{create adhoc67}
{access adhoc67}
{connect adhoc67(1), adhoc66(0)}
{nseg = 1}
{strdef color color = "White"}
{pt3dclear()}
{pt3dadd(185376.000000,110016.000000,61375.000000,9.287602)}
{pt3dadd(184980.000000,109764.000000,61525.000000,7.310908)}
{pt3dadd(184668.000000,109536.000000,61650.000000,4.986545)}
{pt3dadd(184392.000000,109344.000000,61775.000000,4.676958)}
{pt3dadd(183468.000000,109296.000000,62550.000000,2.747934)}
{pt3dadd(183204.000000,109296.000000,62725.000000,2.747934)}
{pt3dadd(182964.000000,109200.000000,62800.000000,2.747934)}
{pt3dadd(181980.000000,108984.000000,62925.000000,3.933950)}
{pt3dadd(180396.000000,108756.000000,63025.000000,4.243537)}
{pt3dadd(180108.000000,108684.000000,63150.000000,5.801057)}
{pt3dadd(179796.000000,108696.000000,63150.000000,8.668429)}
{pt3dadd(179628.000000,108636.000000,63125.000000,9.287602)}

{create adhoc68}
{access adhoc68}
{connect adhoc68(1), adhoc67(0)}
{nseg = 1}
{strdef color color = "White"}
{pt3dclear()}
{pt3dadd(179628.000000,108636.000000,63125.000000,9.287602)}
{pt3dadd(179448.000000,108912.000000,63750.000000,5.387457)}
{pt3dadd(179256.000000,109116.000000,64075.000000,3.832474)}
{pt3dadd(179076.000000,109284.000000,64400.000000,3.049908)}
{pt3dadd(178728.000000,109224.000000,64750.000000,2.274954)}
{pt3dadd(178500.000000,109272.000000,64900.000000,2.274954)}
{pt3dadd(178248.000000,109164.000000,65250.000000,2.274954)}
{pt3dadd(178020.000000,108972.000000,65450.000000,3.049908)}
{pt3dadd(177792.000000,108756.000000,65775.000000,2.597034)}
{pt3dadd(177552.000000,108684.000000,65950.000000,2.815434)}
{pt3dadd(177312.000000,108648.000000,65975.000000,3.692390)}
{pt3dadd(177168.000000,108576.000000,66100.000000,2.592000)}

{create adhoc69}
{access adhoc69}
{connect adhoc69(1), adhoc67(0)}
{nseg = 1}
{strdef color color = "White"}
{pt3dclear()}
{pt3dadd(179628.000000,108636.000000,63125.000000,9.287602)}
{pt3dadd(179484.000000,108612.000000,62725.000000,6.175757)}
{pt3dadd(179208.000000,108588.000000,62625.000000,4.305454)}
{pt3dadd(178896.000000,108492.000000,62625.000000,3.522888)}
{pt3dadd(178656.000000,108420.000000,62625.000000,2.274954)}
{pt3dadd(177948.000000,108468.000000,63075.000000,2.274954)}
{pt3dadd(176736.000000,108456.000000,63175.000000,2.274954)}
{pt3dadd(176484.000000,108384.000000,63125.000000,3.522888)}
{pt3dadd(176196.000000,108384.000000,63250.000000,2.747934)}
{pt3dadd(175824.000000,108324.000000,63375.000000,2.747934)}
{pt3dadd(175596.000000,108288.000000,63425.000000,2.747934)}
{pt3dadd(175392.000000,108312.000000,63575.000000,3.737879)}
{pt3dadd(175164.000000,108276.000000,63600.000000,2.489945)}
{pt3dadd(175008.000000,108216.000000,63700.000000,2.489945)}
{pt3dadd(174792.000000,108192.000000,63700.000000,3.049908)}
{pt3dadd(174480.000000,107880.000000,63750.000000,3.347105)}
{pt3dadd(173844.000000,107412.000000,64050.000000,2.928600)}
{pt3dadd(173796.000000,107544.000000,64250.000000,2.985984)}

{create adhoc70}
{access adhoc70}
{connect adhoc70(1), adhoc66(0)}
{nseg = 1}
{strdef color color = "White"}
{pt3dclear()}
{pt3dadd(185376.000000,110016.000000,61375.000000,9.287602)}
{pt3dadd(185772.000000,109992.000000,60125.000000,5.745775)}
{pt3dadd(185832.000000,110184.000000,59725.000000,4.047465)}
{pt3dadd(185772.000000,110376.000000,59325.000000,3.737879)}
{pt3dadd(185868.000000,110436.000000,58925.000000,3.343729)}
{pt3dadd(186216.000000,110568.000000,58525.000000,4.572881)}
{pt3dadd(186276.000000,110484.000000,58350.000000,4.478975)}

{create adhoc71}
{access adhoc71}
{connect adhoc71(1), adhoc13(0)}
{nseg = 1}
{strdef color color = "White"}
{pt3dclear()}
{pt3dadd(192180.000000,172800.000000,54825.000000,33.279160)}
{pt3dadd(190764.000000,172980.000000,53775.000000,13.742961)}
{pt3dadd(189876.000000,173004.000000,53350.000000,8.845777)}
{pt3dadd(189648.000000,173148.000000,53175.000000,4.864774)}
{pt3dadd(189444.000000,173172.000000,53150.000000,3.874829)}
{pt3dadd(189108.000000,173148.000000,52950.000000,3.874829)}
{pt3dadd(188784.000000,173124.000000,52900.000000,3.874829)}
{pt3dadd(188520.000000,173088.000000,52875.000000,5.803854)}
{pt3dadd(187620.000000,173160.000000,52100.000000,3.429025)}
{pt3dadd(186912.000000,173112.000000,51450.000000,3.429025)}
{pt3dadd(186696.000000,173088.000000,51300.000000,3.429025)}
{pt3dadd(186084.000000,173076.000000,50950.000000,4.986545)}
{pt3dadd(185064.000000,173088.000000,50575.000000,3.057520)}
{pt3dadd(184896.000000,173064.000000,50525.000000,3.057520)}
{pt3dadd(184632.000000,173028.000000,50525.000000,3.057520)}
{pt3dadd(184452.000000,173004.000000,50525.000000,4.305454)}
{pt3dadd(184248.000000,173052.000000,50450.000000,3.307897)}
{pt3dadd(183432.000000,172800.000000,50425.000000,4.513162)}
{pt3dadd(183108.000000,172656.000000,50350.000000,4.299816)}

{create adhoc72}
{access adhoc72}
{connect adhoc72(1), adhoc12(0)}
{nseg = 1}
{strdef color color = "White"}
{pt3dclear()}
{pt3dadd(189672.000000,181140.000000,58050.000000,39.934990)}
{pt3dadd(188124.000000,180468.000000,58050.000000,17.526704)}
{pt3dadd(187812.000000,180384.000000,58225.000000,11.116023)}
{pt3dadd(187668.000000,180360.000000,58375.000000,4.676958)}
{pt3dadd(187476.000000,180444.000000,58550.000000,2.747934)}
{pt3dadd(187284.000000,180576.000000,58675.000000,2.747934)}
{pt3dadd(187092.000000,180732.000000,58800.000000,2.747934)}
{pt3dadd(186828.000000,180828.000000,58950.000000,4.305454)}
{pt3dadd(186564.000000,180984.000000,59075.000000,3.057520)}
{pt3dadd(186336.000000,181104.000000,59150.000000,3.057520)}
{pt3dadd(185868.000000,181368.000000,59375.000000,3.057520)}
{pt3dadd(185688.000000,181464.000000,59600.000000,4.615041)}
{pt3dadd(185448.000000,181596.000000,59725.000000,3.057520)}
{pt3dadd(185184.000000,181836.000000,59925.000000,3.057520)}
{pt3dadd(184584.000000,182664.000000,60275.000000,3.057520)}
{pt3dadd(184464.000000,182784.000000,60700.000000,4.305454)}
{pt3dadd(184320.000000,183024.000000,61050.000000,2.747934)}
{pt3dadd(184116.000000,183048.000000,61425.000000,2.747934)}
{pt3dadd(184080.000000,183144.000000,61825.000000,2.747934)}
{pt3dadd(184044.000000,183372.000000,62075.000000,3.343729)}
{pt3dadd(183948.000000,183900.000000,62775.000000,2.392992)}
{pt3dadd(183684.000000,184440.000000,63175.000000,2.988320)}
{pt3dadd(183480.000000,184536.000000,63350.000000,2.985984)}

{create adhoc73}
{access adhoc73}
{connect adhoc73(1), adhoc11(0)}
{nseg = 1}
{strdef color color = "White"}
{pt3dclear()}
{pt3dadd(188544.000000,182928.000000,57850.000000,46.005108)}
{pt3dadd(186912.000000,183060.000000,57125.000000,17.268308)}
{pt3dadd(186732.000000,182856.000000,57000.000000,10.960985)}
{pt3dadd(186468.000000,182784.000000,56900.000000,3.307897)}
{pt3dadd(185700.000000,182724.000000,56200.000000,2.747934)}
{pt3dadd(184812.000000,182724.000000,55900.000000,2.747934)}
{pt3dadd(184608.000000,182808.000000,55825.000000,2.747934)}
{pt3dadd(184368.000000,182856.000000,55625.000000,4.305454)}
{pt3dadd(184140.000000,182904.000000,55550.000000,3.057520)}
{pt3dadd(183936.000000,182904.000000,55425.000000,3.057520)}
{pt3dadd(183696.000000,183060.000000,55300.000000,3.057520)}
{pt3dadd(183480.000000,183156.000000,55150.000000,3.504016)}
{pt3dadd(183228.000000,183252.000000,55125.000000,1.946496)}
{pt3dadd(182484.000000,183288.000000,54825.000000,1.946496)}
{pt3dadd(182280.000000,183600.000000,54700.000000,1.946496)}
{pt3dadd(182064.000000,183528.000000,54600.000000,2.392992)}
{pt3dadd(181812.000000,183912.000000,54600.000000,1.946496)}
{pt3dadd(181524.000000,184176.000000,54525.000000,1.946496)}
{pt3dadd(181296.000000,184224.000000,54550.000000,2.392992)}
{pt3dadd(180996.000000,184356.000000,54550.000000,2.611392)}
{pt3dadd(180792.000000,184416.000000,54500.000000,2.608160)}
{pt3dadd(180588.000000,184428.000000,54475.000000,2.592000)}

{create adhoc74}
{access adhoc74}
{connect adhoc74(1), adhoc10(0)}
{nseg = 1}
{strdef color color = "White"}
{pt3dclear()}
{pt3dadd(186132.000000,187524.000000,58750.000000,33.279160)}
{pt3dadd(184296.000000,187488.000000,57800.000000,13.742961)}
{pt3dadd(183600.000000,187488.000000,57875.000000,8.845777)}
{pt3dadd(183312.000000,187548.000000,57975.000000,2.936441)}
{pt3dadd(183072.000000,187752.000000,58025.000000,1.946496)}
{pt3dadd(182784.000000,187980.000000,58075.000000,1.946496)}
{pt3dadd(182532.000000,188112.000000,58125.000000,1.946496)}
{pt3dadd(182364.000000,188244.000000,58200.000000,2.392992)}
{pt3dadd(182088.000000,188376.000000,58325.000000,1.946496)}
{pt3dadd(181860.000000,188508.000000,58175.000000,2.392992)}
{pt3dadd(181608.000000,188604.000000,58200.000000,2.715072)}
{pt3dadd(181092.000000,188832.000000,57675.000000,2.780960)}
{pt3dadd(180804.000000,189096.000000,57575.000000,3.110400)}

{create adhoc75}
{access adhoc75}
{connect adhoc75(1), adhoc9(0)}
{nseg = 1}
{strdef color color = "White"}
{pt3dclear()}
{pt3dadd(185688.000000,199944.000000,65075.000000,55.206127)}
{pt3dadd(185664.000000,199032.000000,64600.000000,32.213706)}
{pt3dadd(185532.000000,198708.000000,63975.000000,19.928223)}
{pt3dadd(185412.000000,198348.000000,63400.000000,18.471396)}
{pt3dadd(185340.000000,197796.000000,62975.000000,10.784398)}
{pt3dadd(185004.000000,197520.000000,62300.000000,10.784398)}
{pt3dadd(184692.000000,197856.000000,61650.000000,10.784398)}
{pt3dadd(184380.000000,197796.000000,61175.000000,17.140230)}
{pt3dadd(183204.000000,197808.000000,59150.000000,7.855832)}
{pt3dadd(182856.000000,197520.000000,58725.000000,7.855832)}
{pt3dadd(182604.000000,197580.000000,58250.000000,7.855832)}
{pt3dadd(182508.000000,197484.000000,57775.000000,14.211664)}
{pt3dadd(182184.000000,197568.000000,57150.000000,11.407586)}
{pt3dadd(181896.000000,197652.000000,56650.000000,14.317382)}
{pt3dadd(181728.000000,197700.000000,56075.000000,22.862303)}
{pt3dadd(181440.000000,197664.000000,55450.000000,16.048977)}

{create adhoc76}
{access adhoc76}
{connect adhoc76(1), adhoc75(0)}
{nseg = 1}
{strdef color color = "White"}
{pt3dclear()}
{pt3dadd(181440.000000,197664.000000,55450.000000,16.048977)}
{pt3dadd(178548.000000,197928.000000,55325.000000,9.564700)}
{pt3dadd(178344.000000,197712.000000,55125.000000,6.338820)}
{pt3dadd(178128.000000,197868.000000,55175.000000,4.912244)}
{pt3dadd(177912.000000,197964.000000,55100.000000,2.983220)}
{pt3dadd(177612.000000,198012.000000,55100.000000,2.983220)}
{pt3dadd(177384.000000,198012.000000,55000.000000,2.983220)}
{pt3dadd(177096.000000,198024.000000,54850.000000,4.912244)}
{pt3dadd(176832.000000,198216.000000,54825.000000,3.429025)}
{pt3dadd(176604.000000,198192.000000,54700.000000,3.429025)}
{pt3dadd(176364.000000,198240.000000,54625.000000,3.429025)}
{pt3dadd(176172.000000,198288.000000,54500.000000,4.986545)}
{pt3dadd(175440.000000,199020.000000,54675.000000,3.057520)}
{pt3dadd(175248.000000,199356.000000,54725.000000,3.057520)}
{pt3dadd(175080.000000,199512.000000,54725.000000,3.057520)}
{pt3dadd(174936.000000,199644.000000,54800.000000,4.615041)}
{pt3dadd(174780.000000,199740.000000,54950.000000,3.057520)}
{pt3dadd(174564.000000,199968.000000,55000.000000,3.057520)}
{pt3dadd(174348.000000,200088.000000,55075.000000,3.057520)}
{pt3dadd(174108.000000,200184.000000,55075.000000,5.967316)}
{pt3dadd(173904.000000,200268.000000,55125.000000,4.409795)}
{pt3dadd(173700.000000,200388.000000,55175.000000,4.409795)}
{pt3dadd(173508.000000,200352.000000,55175.000000,4.409795)}
{pt3dadd(173268.000000,200508.000000,55250.000000,6.784625)}
{pt3dadd(172656.000000,200664.000000,55600.000000,3.874829)}
{pt3dadd(172284.000000,200748.000000,55825.000000,3.874829)}
{pt3dadd(171924.000000,200796.000000,56050.000000,3.874829)}
{pt3dadd(171516.000000,200892.000000,56275.000000,6.249659)}
{pt3dadd(171144.000000,201120.000000,56550.000000,3.874829)}
{pt3dadd(170568.000000,201216.000000,56925.000000,3.874829)}
{pt3dadd(170412.000000,201168.000000,56975.000000,3.874829)}
{pt3dadd(170220.000000,201372.000000,57100.000000,5.286720)}
{pt3dadd(169968.000000,201420.000000,57200.000000,2.911891)}
{pt3dadd(169812.000000,201552.000000,57125.000000,2.911891)}
{pt3dadd(169656.000000,201684.000000,57050.000000,2.911891)}
{pt3dadd(168468.000000,201852.000000,57300.000000,4.395110)}
{pt3dadd(167520.000000,202236.000000,57375.000000,2.983220)}
{pt3dadd(167280.000000,202284.000000,57450.000000,2.983220)}
{pt3dadd(167076.000000,202512.000000,57500.000000,3.921567)}
{pt3dadd(166788.000000,202536.000000,57450.000000,4.368063)}
{pt3dadd(166620.000000,202668.000000,57500.000000,3.808072)}
{pt3dadd(166416.000000,202764.000000,57525.000000,3.732480)}

{create adhoc77}
{access adhoc77}
{connect adhoc77(1), adhoc75(0)}
{nseg = 1}
{strdef color color = "White"}
{pt3dclear()}
{pt3dadd(181440.000000,197664.000000,55450.000000,16.048977)}
{pt3dadd(181740.000000,196824.000000,54825.000000,11.199318)}
{pt3dadd(181536.000000,195744.000000,54225.000000,7.319591)}
{pt3dadd(181368.000000,195192.000000,53900.000000,10.765627)}
{pt3dadd(180864.000000,195048.000000,53425.000000,7.855832)}
{pt3dadd(180588.000000,194460.000000,52900.000000,14.211664)}
{pt3dadd(180408.000000,194136.000000,52325.000000,20.567496)}
{pt3dadd(180528.000000,193740.000000,51800.000000,22.686107)}
{pt3dadd(180396.000000,193800.000000,51275.000000,33.279160)}

{create adhoc78}
{access adhoc78}
{connect adhoc78(1), adhoc77(0)}
{nseg = 1}
{strdef color color = "White"}
{pt3dclear()}
{pt3dadd(180396.000000,193800.000000,51275.000000,33.279160)}
{pt3dadd(179172.000000,193572.000000,50775.000000,14.172943)}
{pt3dadd(178692.000000,193284.000000,50775.000000,9.878720)}
{pt3dadd(178176.000000,192960.000000,50775.000000,3.969384)}
{pt3dadd(177156.000000,192900.000000,50775.000000,3.535750)}
{pt3dadd(176952.000000,192984.000000,50750.000000,3.732480)}

{create adhoc79}
{access adhoc79}
{connect adhoc79(1), adhoc77(0)}
{nseg = 1}
{strdef color color = "White"}
{pt3dclear()}
{pt3dadd(180396.000000,193800.000000,51275.000000,33.279160)}
{pt3dadd(180888.000000,193032.000000,50725.000000,22.686107)}
{pt3dadd(181008.000000,192660.000000,50200.000000,25.814022)}
{pt3dadd(181296.000000,191880.000000,49600.000000,20.837264)}
{pt3dadd(181560.000000,191412.000000,49075.000000,33.279160)}

{create adhoc80}
{access adhoc80}
{connect adhoc80(1), adhoc79(0)}
{nseg = 1}
{strdef color color = "White"}
{pt3dclear()}
{pt3dadd(181560.000000,191412.000000,49075.000000,33.279160)}
{pt3dadd(180252.000000,191952.000000,49375.000000,14.688921)}
{pt3dadd(180336.000000,191748.000000,48950.000000,9.413352)}
{pt3dadd(180420.000000,191568.000000,48375.000000,5.432350)}
{pt3dadd(180576.000000,191544.000000,48025.000000,5.803854)}
{pt3dadd(180624.000000,191472.000000,47600.000000,8.673090)}
{pt3dadd(180672.000000,191184.000000,47200.000000,11.145123)}

{create adhoc81}
{access adhoc81}
{connect adhoc81(1), adhoc79(0)}
{nseg = 1}
{strdef color color = "White"}
{pt3dclear()}
{pt3dadd(181560.000000,191412.000000,49075.000000,33.279160)}
{pt3dadd(182256.000000,190728.000000,48475.000000,20.837264)}
{pt3dadd(182868.000000,189960.000000,48025.000000,13.102358)}
{pt3dadd(183000.000000,189276.000000,47525.000000,11.993053)}
{pt3dadd(183252.000000,188424.000000,47250.000000,6.746526)}
{pt3dadd(183264.000000,187992.000000,46850.000000,6.746526)}
{pt3dadd(183048.000000,187692.000000,46800.000000,6.746526)}
{pt3dadd(182940.000000,187356.000000,46675.000000,10.144211)}
{pt3dadd(182952.000000,187056.000000,46525.000000,8.449439)}
{pt3dadd(182976.000000,186744.000000,46450.000000,12.001193)}
{pt3dadd(182940.000000,186432.000000,46375.000000,19.001989)}
{pt3dadd(182988.000000,186096.000000,46300.000000,19.258772)}

{create adhoc82}
{access adhoc82}
{connect adhoc82(1), adhoc81(0)}
{nseg = 1}
{strdef color color = "White"}
{pt3dclear()}
{pt3dadd(182988.000000,186096.000000,46300.000000,19.258772)}
{pt3dadd(181572.000000,186504.000000,46500.000000,9.499480)}
{pt3dadd(180804.000000,186732.000000,46550.000000,6.299688)}
{pt3dadd(180576.000000,186828.000000,46475.000000,4.305454)}
{pt3dadd(180264.000000,187032.000000,46400.000000,4.047465)}
{pt3dadd(180096.000000,187080.000000,46475.000000,5.745775)}
{pt3dadd(180144.000000,187212.000000,46400.000000,6.449724)}

{create adhoc83}
{access adhoc83}
{connect adhoc83(1), adhoc81(0)}
{nseg = 1}
{strdef color color = "White"}
{pt3dclear()}
{pt3dadd(182988.000000,186096.000000,46300.000000,19.258772)}
{pt3dadd(183180.000000,185724.000000,46300.000000,14.623100)}
{pt3dadd(183420.000000,185484.000000,46075.000000,9.373860)}
{pt3dadd(183444.000000,185160.000000,45950.000000,10.846771)}
{pt3dadd(183540.000000,184872.000000,45650.000000,11.771192)}
{pt3dadd(183504.000000,184548.000000,45400.000000,18.618653)}
{pt3dadd(183432.000000,184284.000000,45100.000000,27.732632)}

{create adhoc84}
{access adhoc84}
{connect adhoc84(1), adhoc83(0)}
{nseg = 1}
{strdef color color = "White"}
{pt3dclear()}
{pt3dadd(183432.000000,184284.000000,45100.000000,27.732632)}
{pt3dadd(182400.000000,184500.000000,43900.000000,14.202260)}
{pt3dadd(182148.000000,184608.000000,43550.000000,9.121356)}
{pt3dadd(181968.000000,184800.000000,43225.000000,5.803854)}
{pt3dadd(181608.000000,185448.000000,42775.000000,3.429025)}
{pt3dadd(181440.000000,186084.000000,42375.000000,3.429025)}
{pt3dadd(181488.000000,186612.000000,41950.000000,3.429025)}
{pt3dadd(181836.000000,187368.000000,41525.000000,5.268888)}
{pt3dadd(181764.000000,187596.000000,41350.000000,3.339864)}
{pt3dadd(181692.000000,187860.000000,41400.000000,3.339864)}
{pt3dadd(181776.000000,188088.000000,41400.000000,3.339864)}
{pt3dadd(181644.000000,188232.000000,41400.000000,4.897384)}
{pt3dadd(181296.000000,188724.000000,41250.000000,3.057520)}
{pt3dadd(181272.000000,190080.000000,41025.000000,3.057520)}
{pt3dadd(181248.000000,190260.000000,40950.000000,3.057520)}
{pt3dadd(181248.000000,190488.000000,40800.000000,4.986545)}
{pt3dadd(181176.000000,190908.000000,40525.000000,3.429025)}
{pt3dadd(181176.000000,191376.000000,40075.000000,3.429025)}
{pt3dadd(181008.000000,191796.000000,39650.000000,3.429025)}
{pt3dadd(181128.000000,192324.000000,39300.000000,5.358049)}
{pt3dadd(180948.000000,192660.000000,38900.000000,3.429025)}
{pt3dadd(180864.000000,192900.000000,38550.000000,3.429025)}
{pt3dadd(180624.000000,193188.000000,38300.000000,6.338820)}
{pt3dadd(180528.000000,193416.000000,38025.000000,8.267845)}
{pt3dadd(180552.000000,193452.000000,37675.000000,9.564700)}
{pt3dadd(180564.000000,193500.000000,37475.000000,11.145123)}

{create adhoc85}
{access adhoc85}
{connect adhoc85(1), adhoc83(0)}
{nseg = 1}
{strdef color color = "White"}
{pt3dclear()}
{pt3dadd(183432.000000,184284.000000,45100.000000,27.732632)}
{pt3dadd(183492.000000,184020.000000,44825.000000,18.988421)}
{pt3dadd(183696.000000,183708.000000,44700.000000,11.993053)}
{pt3dadd(184032.000000,183408.000000,44200.000000,11.068632)}
{pt3dadd(184152.000000,183180.000000,44150.000000,5.822105)}
{pt3dadd(184248.000000,182892.000000,44025.000000,5.822105)}
{pt3dadd(184212.000000,182616.000000,43950.000000,5.822105)}
{pt3dadd(184212.000000,182364.000000,43800.000000,10.144211)}
{pt3dadd(184212.000000,182040.000000,43725.000000,5.822105)}
{pt3dadd(184236.000000,181740.000000,43500.000000,5.822105)}
{pt3dadd(184332.000000,181428.000000,43450.000000,5.822105)}
{pt3dadd(184272.000000,181176.000000,43225.000000,10.144211)}
{pt3dadd(184092.000000,180936.000000,43050.000000,5.822105)}
{pt3dadd(184320.000000,180636.000000,42900.000000,5.822105)}
{pt3dadd(184404.000000,180396.000000,42650.000000,5.822105)}
{pt3dadd(184212.000000,180144.000000,42525.000000,9.373860)}
{pt3dadd(184476.000000,179832.000000,42425.000000,5.051754)}
{pt3dadd(184500.000000,179568.000000,42475.000000,5.051754)}
{pt3dadd(184548.000000,179244.000000,42375.000000,5.051754)}
{pt3dadd(185076.000000,178860.000000,42525.000000,9.373860)}
{pt3dadd(185460.000000,178536.000000,42500.000000,5.822105)}
{pt3dadd(185652.000000,178236.000000,42550.000000,5.822105)}
{pt3dadd(186012.000000,177948.000000,42550.000000,5.822105)}
{pt3dadd(186036.000000,177732.000000,42400.000000,11.068632)}
{pt3dadd(186312.000000,177312.000000,42400.000000,6.746526)}
{pt3dadd(186336.000000,177060.000000,42300.000000,6.746526)}
{pt3dadd(186336.000000,176772.000000,42150.000000,6.746526)}
{pt3dadd(186312.000000,176460.000000,42050.000000,11.068632)}
{pt3dadd(186468.000000,176232.000000,42125.000000,5.822105)}
{pt3dadd(186768.000000,175992.000000,42125.000000,5.822105)}
{pt3dadd(186732.000000,175764.000000,42125.000000,5.822105)}
{pt3dadd(186828.000000,175440.000000,42025.000000,10.846771)}
{pt3dadd(186912.000000,175176.000000,42025.000000,6.524665)}
{pt3dadd(187032.000000,174888.000000,42050.000000,6.524665)}
{pt3dadd(187032.000000,174600.000000,42050.000000,6.524665)}
{pt3dadd(187080.000000,174336.000000,42050.000000,11.771192)}
{pt3dadd(187236.000000,174060.000000,42100.000000,6.746526)}
{pt3dadd(187236.000000,173808.000000,42100.000000,6.746526)}
{pt3dadd(187332.000000,173496.000000,42025.000000,6.746526)}
{pt3dadd(187296.000000,173160.000000,42100.000000,11.993053)}
{pt3dadd(187464.000000,172836.000000,41900.000000,11.993053)}
{pt3dadd(187440.000000,172572.000000,41750.000000,18.988421)}
{pt3dadd(187368.000000,172368.000000,41900.000000,27.732632)}

{create adhoc86}
{access adhoc86}
{connect adhoc86(1), adhoc85(0)}
{nseg = 1}
{strdef color color = "White"}
{pt3dclear()}
{pt3dadd(187368.000000,172368.000000,41900.000000,27.732632)}
{pt3dadd(187488.000000,172692.000000,41350.000000,16.163801)}
{pt3dadd(187536.000000,172704.000000,40925.000000,10.298281)}
{pt3dadd(187464.000000,172608.000000,40650.000000,7.426584)}
{pt3dadd(187548.000000,172500.000000,40225.000000,3.874829)}
{pt3dadd(187680.000000,172476.000000,39875.000000,3.874829)}
{pt3dadd(187908.000000,172332.000000,39475.000000,3.874829)}
{pt3dadd(187920.000000,172092.000000,39050.000000,5.122763)}
{pt3dadd(187812.000000,171888.000000,38600.000000,2.747934)}
{pt3dadd(187812.000000,171684.000000,38275.000000,2.747934)}
{pt3dadd(187872.000000,171468.000000,37825.000000,2.747934)}
{pt3dadd(187956.000000,171180.000000,37400.000000,4.676958)}
{pt3dadd(188004.000000,170532.000000,36950.000000,3.429025)}
{pt3dadd(188052.000000,169884.000000,36575.000000,4.676958)}
{pt3dadd(188064.000000,169404.000000,36250.000000,6.234479)}
{pt3dadd(188040.000000,168924.000000,36050.000000,6.175757)}
{pt3dadd(187884.000000,168576.000000,35725.000000,9.287602)}

{create adhoc87}
{access adhoc87}
{connect adhoc87(1), adhoc85(0)}
{nseg = 1}
{strdef color color = "White"}
{pt3dclear()}
{pt3dadd(187368.000000,172368.000000,41900.000000,27.732632)}
{pt3dadd(187428.000000,172080.000000,41925.000000,18.988421)}
{pt3dadd(187560.000000,171792.000000,41975.000000,11.993053)}
{pt3dadd(187716.000000,171492.000000,41975.000000,10.298281)}
{pt3dadd(187836.000000,171228.000000,42200.000000,5.051754)}
{pt3dadd(187920.000000,170928.000000,42225.000000,5.051754)}
{pt3dadd(187968.000000,170568.000000,42175.000000,5.051754)}
{pt3dadd(188088.000000,170196.000000,42125.000000,7.961550)}
{pt3dadd(188100.000000,169908.000000,42050.000000,4.409795)}
{pt3dadd(188112.000000,169680.000000,42075.000000,4.409795)}
{pt3dadd(188172.000000,169404.000000,42000.000000,4.409795)}
{pt3dadd(188232.000000,169092.000000,41950.000000,7.319591)}
{pt3dadd(188052.000000,168852.000000,42025.000000,4.409795)}
{pt3dadd(188100.000000,168624.000000,42075.000000,4.409795)}
{pt3dadd(188088.000000,168300.000000,42050.000000,4.409795)}
{pt3dadd(187956.000000,168012.000000,42125.000000,7.961550)}
{pt3dadd(187968.000000,167748.000000,42075.000000,5.051754)}
{pt3dadd(187896.000000,167460.000000,42175.000000,5.051754)}
{pt3dadd(187716.000000,167196.000000,42100.000000,5.051754)}
{pt3dadd(187656.000000,166932.000000,42100.000000,8.603509)}
{pt3dadd(187704.000000,166704.000000,42000.000000,5.051754)}
{pt3dadd(187644.000000,166488.000000,42050.000000,5.051754)}
{pt3dadd(187584.000000,166212.000000,42075.000000,5.051754)}
{pt3dadd(187584.000000,165972.000000,42000.000000,9.373860)}
{pt3dadd(187608.000000,165684.000000,41900.000000,5.822105)}
{pt3dadd(187812.000000,165432.000000,41750.000000,5.822105)}
{pt3dadd(188196.000000,165132.000000,41575.000000,5.822105)}
{pt3dadd(188952.000000,164904.000000,41575.000000,10.144211)}
{pt3dadd(189492.000000,164580.000000,41650.000000,5.822105)}
{pt3dadd(189768.000000,164352.000000,41575.000000,5.822105)}
{pt3dadd(190116.000000,164064.000000,41550.000000,5.822105)}
{pt3dadd(190380.000000,163764.000000,41575.000000,10.144211)}
{pt3dadd(190476.000000,163512.000000,41650.000000,5.822105)}
{pt3dadd(190452.000000,163296.000000,41700.000000,5.822105)}
{pt3dadd(190500.000000,163008.000000,41750.000000,5.822105)}
{pt3dadd(190704.000000,162756.000000,41800.000000,10.144211)}
{pt3dadd(190872.000000,162480.000000,41725.000000,5.822105)}
{pt3dadd(191040.000000,162228.000000,41675.000000,5.822105)}
{pt3dadd(191604.000000,161412.000000,41700.000000,5.822105)}
{pt3dadd(191952.000000,160644.000000,41850.000000,10.144211)}
{pt3dadd(191808.000000,160440.000000,41575.000000,5.822105)}
{pt3dadd(191808.000000,160140.000000,41600.000000,5.822105)}
{pt3dadd(191700.000000,159876.000000,41700.000000,5.822105)}
{pt3dadd(191640.000000,159660.000000,41700.000000,10.144211)}
{pt3dadd(191652.000000,159384.000000,41750.000000,5.822105)}
{pt3dadd(191592.000000,159096.000000,41750.000000,5.822105)}
{pt3dadd(191676.000000,158844.000000,41775.000000,5.822105)}
{pt3dadd(191676.000000,158640.000000,41650.000000,9.373860)}
{pt3dadd(191640.000000,158424.000000,41600.000000,5.051754)}
{pt3dadd(191652.000000,158244.000000,41625.000000,5.051754)}
{pt3dadd(191652.000000,157956.000000,41650.000000,8.603509)}
{pt3dadd(191748.000000,157704.000000,41700.000000,12.155263)}
{pt3dadd(191796.000000,157416.000000,41700.000000,13.339181)}
{pt3dadd(191820.000000,157140.000000,41775.000000,19.258772)}

{create adhoc88}
{access adhoc88}
{connect adhoc88(1), adhoc87(0)}
{nseg = 1}
{strdef color color = "White"}
{pt3dclear()}
{pt3dadd(191820.000000,157140.000000,41775.000000,19.258772)}
{pt3dadd(191676.000000,157152.000000,40625.000000,10.015458)}
{pt3dadd(191736.000000,156960.000000,40350.000000,6.609275)}
{pt3dadd(191700.000000,156300.000000,39900.000000,4.986545)}
{pt3dadd(191820.000000,155988.000000,39450.000000,3.429025)}
{pt3dadd(191904.000000,155592.000000,39000.000000,4.024820)}
{pt3dadd(191964.000000,154884.000000,38575.000000,4.346900)}
{pt3dadd(192276.000000,154080.000000,38175.000000,3.029792)}
{pt3dadd(192564.000000,153876.000000,38125.000000,3.110400)}

{create adhoc89}
{access adhoc89}
{connect adhoc89(1), adhoc87(0)}
{nseg = 1}
{strdef color color = "White"}
{pt3dclear()}
{pt3dadd(191820.000000,157140.000000,41775.000000,19.258772)}
{pt3dadd(191988.000000,156900.000000,41975.000000,12.269250)}
{pt3dadd(192252.000000,156624.000000,42100.000000,7.961550)}
{pt3dadd(192156.000000,156408.000000,42200.000000,7.319591)}
{pt3dadd(192132.000000,156192.000000,42250.000000,4.409795)}
{pt3dadd(192252.000000,155928.000000,42300.000000,4.409795)}
{pt3dadd(192420.000000,155712.000000,42350.000000,4.409795)}
{pt3dadd(192360.000000,155496.000000,42350.000000,7.319591)}
{pt3dadd(192444.000000,155292.000000,42475.000000,4.409795)}
{pt3dadd(192408.000000,155004.000000,42450.000000,4.409795)}
{pt3dadd(192408.000000,154740.000000,42550.000000,4.409795)}
{pt3dadd(192384.000000,154488.000000,42625.000000,7.961550)}
{pt3dadd(192348.000000,154212.000000,42625.000000,5.051754)}
{pt3dadd(192288.000000,153996.000000,42625.000000,5.051754)}
{pt3dadd(192288.000000,153732.000000,42650.000000,5.051754)}
{pt3dadd(192228.000000,153504.000000,42800.000000,9.373860)}
{pt3dadd(192240.000000,153204.000000,42800.000000,5.822105)}
{pt3dadd(192288.000000,153000.000000,42900.000000,5.822105)}
{pt3dadd(192252.000000,152688.000000,43050.000000,5.822105)}
{pt3dadd(192264.000000,152424.000000,43050.000000,9.373860)}
{pt3dadd(192276.000000,152148.000000,43175.000000,5.051754)}
{pt3dadd(192324.000000,151932.000000,43175.000000,5.051754)}
{pt3dadd(192372.000000,151680.000000,43350.000000,5.051754)}
{pt3dadd(192504.000000,151428.000000,43200.000000,7.961550)}
{pt3dadd(192444.000000,151212.000000,43175.000000,4.409795)}
{pt3dadd(192456.000000,150900.000000,43250.000000,4.409795)}
{pt3dadd(192396.000000,150612.000000,43425.000000,4.409795)}
{pt3dadd(192444.000000,150240.000000,43625.000000,7.807480)}
{pt3dadd(192372.000000,149868.000000,43750.000000,4.897684)}
{pt3dadd(192504.000000,149592.000000,43925.000000,4.897684)}
{pt3dadd(192516.000000,149280.000000,43975.000000,4.897684)}
{pt3dadd(192564.000000,149064.000000,43950.000000,7.807480)}
{pt3dadd(192624.000000,148836.000000,43875.000000,4.409795)}
{pt3dadd(192552.000000,148536.000000,43725.000000,7.961550)}
{pt3dadd(192528.000000,148284.000000,43725.000000,11.513304)}
{pt3dadd(192468.000000,147972.000000,43600.000000,13.339181)}
{pt3dadd(192552.000000,147684.000000,43700.000000,19.258772)}

{create adhoc90}
{access adhoc90}
{connect adhoc90(1), adhoc89(0)}
{nseg = 1}
{strdef color color = "White"}
{pt3dclear()}
{pt3dadd(192552.000000,147684.000000,43700.000000,19.258772)}
{pt3dadd(192144.000000,147576.000000,42800.000000,10.634632)}
{pt3dadd(191832.000000,147300.000000,42450.000000,6.980779)}
{pt3dadd(191292.000000,147060.000000,42075.000000,4.418969)}
{pt3dadd(190716.000000,146040.000000,42100.000000,2.489945)}
{pt3dadd(190104.000000,145632.000000,42075.000000,2.489945)}
{pt3dadd(188952.000000,144948.000000,42075.000000,2.489945)}
{pt3dadd(188784.000000,144996.000000,42000.000000,4.047465)}
{pt3dadd(188556.000000,144924.000000,41950.000000,4.305454)}
{pt3dadd(187380.000000,144000.000000,42150.000000,4.751950)}
{pt3dadd(187236.000000,143868.000000,42125.000000,6.919917)}
{pt3dadd(185904.000000,143436.000000,42100.000000,3.732480)}

{create adhoc91}
{access adhoc91}
{connect adhoc91(1), adhoc89(0)}
{nseg = 1}
{strdef color color = "White"}
{pt3dclear()}
{pt3dadd(192552.000000,147684.000000,43700.000000,19.258772)}
{pt3dadd(192576.000000,147468.000000,43925.000000,12.269250)}
{pt3dadd(192624.000000,147228.000000,44125.000000,7.961550)}
{pt3dadd(192564.000000,147036.000000,44250.000000,7.191199)}
{pt3dadd(192528.000000,146748.000000,44475.000000,4.281404)}
{pt3dadd(192540.000000,146460.000000,44525.000000,4.281404)}
{pt3dadd(192588.000000,146268.000000,44550.000000,4.281404)}
{pt3dadd(192588.000000,145944.000000,44600.000000,7.191199)}
{pt3dadd(192672.000000,145668.000000,44650.000000,4.409795)}
{pt3dadd(192696.000000,145368.000000,44700.000000,4.409795)}
{pt3dadd(192696.000000,145152.000000,44800.000000,4.409795)}
{pt3dadd(192780.000000,144780.000000,44900.000000,6.784625)}
{pt3dadd(192636.000000,144420.000000,44750.000000,3.874829)}
{pt3dadd(192492.000000,144024.000000,44850.000000,3.874829)}
{pt3dadd(192240.000000,143796.000000,45125.000000,3.874829)}
{pt3dadd(191988.000000,143520.000000,45150.000000,6.784625)}
{pt3dadd(192012.000000,143232.000000,45200.000000,4.409795)}
{pt3dadd(192012.000000,142956.000000,45175.000000,4.409795)}
{pt3dadd(191952.000000,142740.000000,45175.000000,4.409795)}
{pt3dadd(192000.000000,142452.000000,45100.000000,6.784625)}
{pt3dadd(192024.000000,142164.000000,45150.000000,3.874829)}
{pt3dadd(191916.000000,141948.000000,45150.000000,3.874829)}
{pt3dadd(191892.000000,141660.000000,45100.000000,3.874829)}
{pt3dadd(191832.000000,141360.000000,45000.000000,5.432350)}
{pt3dadd(191772.000000,141072.000000,45000.000000,3.057520)}
{pt3dadd(191856.000000,140796.000000,44925.000000,3.057520)}
{pt3dadd(191916.000000,140520.000000,44875.000000,3.057520)}
{pt3dadd(191856.000000,140316.000000,44825.000000,5.432350)}
{pt3dadd(191784.000000,140064.000000,44825.000000,3.874829)}
{pt3dadd(191904.000000,139740.000000,44875.000000,3.874829)}
{pt3dadd(192060.000000,139452.000000,44675.000000,3.874829)}
{pt3dadd(192192.000000,139212.000000,44575.000000,5.803854)}
{pt3dadd(192360.000000,138936.000000,44425.000000,3.429025)}
{pt3dadd(192564.000000,138684.000000,44275.000000,3.429025)}
{pt3dadd(192876.000000,138432.000000,44125.000000,5.803854)}
{pt3dadd(193008.000000,138168.000000,43700.000000,8.178683)}
{pt3dadd(193008.000000,137868.000000,43250.000000,9.416098)}
{pt3dadd(193008.000000,137676.000000,43175.000000,13.374147)}

{create adhoc92}
{access adhoc92}
{connect adhoc92(1), adhoc91(0)}
{nseg = 1}
{strdef color color = "White"}
{pt3dclear()}
{pt3dadd(193008.000000,137676.000000,43175.000000,13.374147)}
{pt3dadd(192156.000000,137676.000000,41900.000000,7.195201)}
{pt3dadd(192060.000000,137640.000000,41700.000000,4.230143)}
{pt3dadd(192036.000000,137568.000000,41475.000000,4.478975)}

{create adhoc93}
{access adhoc93}
{connect adhoc93(1), adhoc91(0)}
{nseg = 1}
{strdef color color = "White"}
{pt3dclear()}
{pt3dadd(193008.000000,137676.000000,43175.000000,13.374147)}
{pt3dadd(193008.000000,137376.000000,42825.000000,11.888131)}
{pt3dadd(192744.000000,137400.000000,42500.000000,9.906776)}
{pt3dadd(192648.000000,137304.000000,42200.000000,7.430082)}

{create adhoc94}
{access adhoc94}
{connect adhoc94(1), adhoc8(0)}
{nseg = 1}
{strdef color color = "White"}
{pt3dclear()}
{pt3dadd(186756.000000,202416.000000,69375.000000,33.279160)}
{pt3dadd(184176.000000,204312.000000,68500.000000,14.688921)}
{pt3dadd(182352.000000,205296.000000,68500.000000,9.413352)}
{pt3dadd(182100.000000,205692.000000,68850.000000,7.379626)}
{pt3dadd(181656.000000,205896.000000,69225.000000,5.822105)}
{pt3dadd(181440.000000,206184.000000,69325.000000,5.822105)}
{pt3dadd(181260.000000,206592.000000,69475.000000,5.822105)}
{pt3dadd(180084.000000,208284.000000,69475.000000,11.068632)}
{pt3dadd(179844.000000,208632.000000,69200.000000,6.746526)}
{pt3dadd(179592.000000,208872.000000,69125.000000,6.746526)}
{pt3dadd(179196.000000,209316.000000,69225.000000,6.746526)}
{pt3dadd(179124.000000,209556.000000,69125.000000,11.068632)}
{pt3dadd(178920.000000,209868.000000,68975.000000,5.822105)}
{pt3dadd(178788.000000,210204.000000,68900.000000,5.822105)}
{pt3dadd(178656.000000,210600.000000,68750.000000,5.822105)}
{pt3dadd(178512.000000,210888.000000,68525.000000,8.731901)}
{pt3dadd(178560.000000,211176.000000,68600.000000,4.409795)}
{pt3dadd(177480.000000,213540.000000,68550.000000,4.409795)}
{pt3dadd(177156.000000,213804.000000,67125.000000,4.409795)}
{pt3dadd(176712.000000,213960.000000,66625.000000,6.784625)}
{pt3dadd(176400.000000,213936.000000,66175.000000,3.874829)}
{pt3dadd(175452.000000,214608.000000,65750.000000,3.874829)}
{pt3dadd(174720.000000,215124.000000,65150.000000,3.874829)}
{pt3dadd(173604.000000,216012.000000,65325.000000,7.426584)}
{pt3dadd(172872.000000,217260.000000,65325.000000,5.051754)}
{pt3dadd(172380.000000,217512.000000,65000.000000,5.051754)}
{pt3dadd(172176.000000,217776.000000,64750.000000,5.051754)}
{pt3dadd(171972.000000,217968.000000,64600.000000,8.603509)}
{pt3dadd(171912.000000,218232.000000,64550.000000,5.051754)}
{pt3dadd(171816.000000,218520.000000,64450.000000,5.051754)}
{pt3dadd(171780.000000,218688.000000,64500.000000,5.051754)}
{pt3dadd(171744.000000,218916.000000,64350.000000,7.426584)}
{pt3dadd(171804.000000,219084.000000,64100.000000,3.874829)}
{pt3dadd(171816.000000,219312.000000,63725.000000,3.874829)}
{pt3dadd(171792.000000,219564.000000,63075.000000,3.874829)}
{pt3dadd(171612.000000,219804.000000,62575.000000,6.784625)}
{pt3dadd(171432.000000,219972.000000,61900.000000,8.731901)}
{pt3dadd(171084.000000,219972.000000,61475.000000,13.553168)}
{pt3dadd(170340.000000,220020.000000,61050.000000,23.110527)}

{create adhoc95}
{access adhoc95}
{connect adhoc95(1), adhoc94(0)}
{nseg = 1}
{strdef color color = "White"}
{pt3dclear()}
{pt3dadd(170340.000000,220020.000000,61050.000000,23.110527)}
{pt3dadd(170232.000000,220068.000000,60625.000000,16.619607)}
{pt3dadd(170136.000000,219708.000000,60100.000000,10.699318)}

{create adhoc96}
{access adhoc96}
{connect adhoc96(1), adhoc94(0)}
{nseg = 1}
{strdef color color = "White"}
{pt3dclear()}
{pt3dadd(170340.000000,220020.000000,61050.000000,23.110527)}
{pt3dadd(169044.000000,218100.000000,60900.000000,9.995099)}
{pt3dadd(168312.000000,217560.000000,61075.000000,6.597059)}
{pt3dadd(167652.000000,217692.000000,61250.000000,2.597034)}
{pt3dadd(167364.000000,217584.000000,61350.000000,1.822080)}
{pt3dadd(167112.000000,217752.000000,61350.000000,1.822080)}
{pt3dadd(166836.000000,217872.000000,61500.000000,1.822080)}
{pt3dadd(166548.000000,218004.000000,61650.000000,2.597034)}
{pt3dadd(166332.000000,218064.000000,61800.000000,2.274954)}
{pt3dadd(165516.000000,218292.000000,62275.000000,2.274954)}
{pt3dadd(165384.000000,218268.000000,62325.000000,2.274954)}
{pt3dadd(165144.000000,218244.000000,62450.000000,2.691590)}
{pt3dadd(164436.000000,218148.000000,62775.000000,2.238716)}
{pt3dadd(162996.000000,218268.000000,62950.000000,2.731193)}
{pt3dadd(162408.000000,218412.000000,63175.000000,3.110400)}

{create adhoc97}
{access adhoc97}
{connect adhoc97(1), adhoc94(0)}
{nseg = 1}
{strdef color color = "White"}
{pt3dclear()}
{pt3dadd(170340.000000,220020.000000,61050.000000,23.110527)}
{pt3dadd(169416.000000,220044.000000,61175.000000,11.769948)}
{pt3dadd(168192.000000,220812.000000,61175.000000,7.661969)}
{pt3dadd(168024.000000,220860.000000,61175.000000,4.329808)}
{pt3dadd(167160.000000,221244.000000,61400.000000,2.489945)}
{pt3dadd(166476.000000,221532.000000,61725.000000,2.489945)}
{pt3dadd(166248.000000,221484.000000,61750.000000,2.489945)}
{pt3dadd(165516.000000,221832.000000,61975.000000,3.049908)}
{pt3dadd(165336.000000,222000.000000,62000.000000,2.059963)}
{pt3dadd(165096.000000,222228.000000,62175.000000,2.059963)}
{pt3dadd(164640.000000,222372.000000,62325.000000,2.059963)}
{pt3dadd(164400.000000,222624.000000,62350.000000,3.049908)}
{pt3dadd(164244.000000,222612.000000,62375.000000,2.489945)}
{pt3dadd(163068.000000,223716.000000,62575.000000,2.489945)}
{pt3dadd(162912.000000,223884.000000,62600.000000,2.489945)}
{pt3dadd(162600.000000,223980.000000,62650.000000,3.049908)}
{pt3dadd(162348.000000,224148.000000,62700.000000,2.059963)}
{pt3dadd(162132.000000,224244.000000,62700.000000,2.059963)}
{pt3dadd(161892.000000,224244.000000,62675.000000,2.059963)}
{pt3dadd(161664.000000,224220.000000,62725.000000,2.506459)}
{pt3dadd(160596.000000,224784.000000,62675.000000,1.946496)}
{pt3dadd(159516.000000,225540.000000,63050.000000,1.946496)}
{pt3dadd(158184.000000,225936.000000,63050.000000,1.946496)}
{pt3dadd(157992.000000,226020.000000,63100.000000,3.504016)}
{pt3dadd(157764.000000,226296.000000,63200.000000,3.057520)}
{pt3dadd(157548.000000,226524.000000,63200.000000,3.057520)}
{pt3dadd(157296.000000,226800.000000,63325.000000,3.057520)}
{pt3dadd(156852.000000,227532.000000,63775.000000,4.615041)}
{pt3dadd(156684.000000,227748.000000,63775.000000,3.057520)}
{pt3dadd(156624.000000,227976.000000,63900.000000,3.057520)}
{pt3dadd(156492.000000,228216.000000,63875.000000,3.057520)}
{pt3dadd(156360.000000,228384.000000,64000.000000,4.047465)}
{pt3dadd(156144.000000,228540.000000,63975.000000,3.264899)}
{pt3dadd(155796.000000,228960.000000,64450.000000,3.860694)}
{pt3dadd(155436.000000,229236.000000,64725.000000,5.434490)}
{pt3dadd(155364.000000,229224.000000,64950.000000,4.478975)}

{create adhoc98}
{access adhoc98}
{connect adhoc98(1), adhoc7(0)}
{nseg = 1}
{strdef color color = "White"}
{pt3dclear()}
{pt3dadd(189660.000000,203736.000000,77400.000000,736.431300)}
{pt3dadd(189120.000000,204564.000000,77475.000000,364.894610)}
{pt3dadd(189228.000000,204744.000000,78025.000000,294.169798)}
{pt3dadd(189420.000000,204792.000000,78375.000000,194.835718)}
{pt3dadd(189528.000000,204840.000000,78625.000000,200.757972)}
{pt3dadd(189696.000000,204816.000000,78900.000000,206.129630)}
{pt3dadd(189780.000000,204720.000000,79175.000000,211.769874)}
{pt3dadd(189828.000000,204636.000000,79375.000000,220.271676)}
{pt3dadd(189960.000000,204516.000000,79650.000000,204.775420)}
{pt3dadd(190104.000000,204492.000000,79775.000000,195.221948)}
{pt3dadd(190284.000000,204516.000000,79900.000000,193.604096)}
{pt3dadd(190404.000000,204420.000000,80125.000000,188.752628)}
{pt3dadd(190524.000000,204444.000000,80375.000000,184.294488)}
{pt3dadd(190788.000000,204456.000000,80625.000000,194.186330)}
{pt3dadd(190872.000000,204480.000000,80750.000000,201.668660)}
{pt3dadd(190944.000000,204468.000000,80875.000000,208.308922)}
{pt3dadd(191088.000000,204432.000000,81100.000000,220.746706)}
{pt3dadd(191172.000000,204384.000000,81250.000000,216.703044)}
{pt3dadd(191256.000000,204408.000000,81400.000000,212.765950)}
{pt3dadd(191340.000000,204408.000000,81550.000000,218.018492)}
{pt3dadd(191388.000000,204444.000000,81700.000000,213.883832)}
{pt3dadd(191424.000000,204468.000000,81850.000000,209.552872)}
{pt3dadd(191592.000000,204468.000000,82025.000000,212.457530)}
{pt3dadd(191700.000000,204468.000000,82150.000000,219.715602)}
{pt3dadd(191772.000000,204528.000000,82300.000000,219.728574)}
{pt3dadd(191868.000000,204552.000000,82475.000000,219.721654)}
{pt3dadd(191976.000000,204564.000000,82625.000000,219.496200)}
{pt3dadd(192096.000000,204528.000000,82750.000000,215.551836)}
{pt3dadd(192240.000000,204576.000000,82925.000000,206.464686)}
{pt3dadd(192372.000000,204540.000000,83075.000000,196.533184)}
{pt3dadd(192456.000000,204516.000000,83200.000000,196.521976)}
{pt3dadd(192468.000000,204504.000000,83325.000000,196.747430)}
{pt3dadd(192564.000000,204468.000000,83450.000000,158.636758)}
{pt3dadd(192600.000000,204420.000000,83600.000000,168.743576)}
{pt3dadd(192672.000000,204348.000000,83750.000000,176.664920)}
{pt3dadd(192708.000000,204300.000000,83900.000000,179.882334)}
{pt3dadd(192768.000000,204288.000000,84075.000000,174.190026)}
{pt3dadd(192888.000000,204168.000000,84175.000000,214.221234)}
{pt3dadd(192936.000000,204156.000000,84400.000000,209.868822)}
{pt3dadd(193020.000000,204108.000000,84575.000000,198.371152)}
{pt3dadd(193080.000000,204072.000000,84800.000000,183.633738)}
{pt3dadd(193188.000000,204048.000000,85025.000000,177.828376)}
{pt3dadd(193380.000000,204072.000000,85300.000000,175.914434)}
{pt3dadd(193512.000000,204156.000000,85625.000000,165.330434)}
{pt3dadd(193572.000000,204240.000000,85900.000000,160.817404)}
{pt3dadd(193632.000000,204216.000000,86200.000000,162.257404)}
{pt3dadd(193668.000000,204120.000000,86350.000000,160.677376)}
{pt3dadd(193740.000000,204108.000000,86550.000000,152.355878)}
{pt3dadd(193764.000000,204108.000000,86725.000000,145.482402)}
{pt3dadd(193812.000000,204072.000000,86850.000000,144.879454)}
{pt3dadd(193788.000000,204012.000000,87000.000000,146.391454)}
{pt3dadd(193776.000000,204000.000000,87175.000000,148.731466)}
{pt3dadd(193800.000000,203880.000000,87325.000000,153.481292)}
{pt3dadd(193740.000000,203676.000000,87475.000000,168.092488)}
{pt3dadd(193740.000000,203640.000000,87625.000000,176.784792)}
{pt3dadd(193740.000000,203628.000000,87750.000000,181.614386)}
{pt3dadd(193740.000000,203604.000000,87875.000000,180.854402)}
{pt3dadd(193764.000000,203688.000000,88000.000000,182.765718)}
{pt3dadd(193764.000000,203544.000000,88150.000000,183.614126)}
{pt3dadd(193716.000000,203484.000000,88275.000000,187.792460)}
{pt3dadd(193740.000000,203508.000000,88425.000000,200.468638)}
{pt3dadd(193812.000000,203316.000000,88550.000000,213.976466)}
{pt3dadd(193932.000000,203328.000000,88850.000000,221.692344)}
{pt3dadd(193908.000000,203304.000000,89000.000000,228.029656)}
{pt3dadd(193920.000000,203160.000000,89150.000000,236.117246)}
{pt3dadd(193968.000000,203088.000000,89450.000000,231.324630)}
{pt3dadd(194004.000000,202968.000000,89675.000000,233.645432)}
{pt3dadd(194124.000000,202992.000000,89900.000000,236.084808)}
{pt3dadd(194220.000000,202932.000000,90150.000000,228.899088)}
{pt3dadd(194244.000000,202908.000000,90425.000000,224.341410)}
{pt3dadd(194352.000000,202860.000000,90675.000000,226.572680)}
{pt3dadd(194400.000000,202836.000000,90925.000000,225.563466)}
{pt3dadd(194448.000000,202836.000000,91150.000000,215.408212)}
{pt3dadd(194484.000000,202788.000000,91375.000000,216.256620)}
{pt3dadd(194568.000000,202788.000000,91700.000000,214.127464)}
{pt3dadd(194520.000000,202800.000000,91800.000000,209.786074)}
{pt3dadd(194616.000000,202752.000000,91975.000000,205.103794)}
{pt3dadd(194568.000000,202716.000000,92125.000000,210.701920)}
{pt3dadd(194532.000000,202680.000000,92225.000000,214.828948)}
{pt3dadd(194508.000000,202656.000000,92350.000000,219.168388)}
{pt3dadd(194472.000000,202644.000000,92475.000000,223.501764)}
{pt3dadd(194460.000000,202584.000000,92575.000000,229.441816)}
{pt3dadd(194424.000000,202608.000000,92700.000000,236.118026)}
{pt3dadd(194436.000000,202584.000000,92800.000000,243.135682)}
{pt3dadd(194424.000000,202548.000000,92900.000000,250.766938)}
{pt3dadd(194424.000000,202560.000000,93025.000000,250.774952)}
{pt3dadd(194436.000000,202524.000000,93225.000000,248.213606)}
{pt3dadd(194412.000000,202476.000000,93425.000000,239.502360)}
{pt3dadd(194436.000000,202440.000000,93650.000000,234.715974)}
{pt3dadd(194448.000000,202404.000000,93750.000000,227.097690)}
{pt3dadd(194424.000000,202332.000000,93850.000000,232.121924)}
{pt3dadd(194436.000000,202356.000000,93975.000000,232.113910)}
{pt3dadd(194412.000000,202344.000000,94100.000000,238.482322)}
{pt3dadd(194424.000000,202236.000000,94225.000000,238.698060)}
{pt3dadd(194424.000000,202248.000000,94425.000000,236.687902)}
{pt3dadd(194484.000000,202164.000000,94625.000000,229.420042)}
{pt3dadd(194544.000000,202140.000000,94825.000000,229.407070)}
{pt3dadd(194544.000000,202140.000000,94975.000000,236.751312)}
{pt3dadd(194616.000000,202080.000000,95175.000000,241.559808)}
{pt3dadd(194604.000000,202128.000000,95400.000000,243.577980)}
{pt3dadd(194604.000000,202128.000000,95575.000000,253.982320)}
{pt3dadd(194580.000000,202068.000000,95775.000000,267.180012)}
{pt3dadd(194688.000000,202080.000000,95975.000000,267.195032)}
{pt3dadd(194760.000000,202056.000000,96175.000000,272.224426)}
{pt3dadd(194736.000000,202104.000000,96425.000000,285.125790)}
{pt3dadd(194712.000000,202104.000000,96675.000000,281.751462)}
{pt3dadd(194640.000000,202092.000000,96925.000000,278.628384)}
{pt3dadd(194556.000000,202080.000000,97175.000000,276.054684)}
{pt3dadd(194580.000000,202104.000000,97475.000000,278.875630)}
{pt3dadd(194544.000000,202008.000000,97650.000000,283.602432)}
{pt3dadd(194556.000000,201984.000000,97825.000000,294.669174)}
{pt3dadd(194508.000000,201912.000000,98025.000000,303.614408)}
{pt3dadd(194508.000000,201888.000000,98200.000000,309.162462)}
{pt3dadd(194496.000000,201912.000000,98600.000000,301.074274)}
{pt3dadd(194412.000000,201876.000000,98825.000000,291.056378)}
{pt3dadd(194412.000000,201888.000000,99125.000000,263.346436)}
{pt3dadd(194220.000000,201768.000000,99425.000000,234.239020)}
{pt3dadd(194100.000000,201804.000000,99700.000000,215.627664)}
{pt3dadd(194076.000000,201888.000000,100075.000000,197.331132)}
{pt3dadd(193944.000000,201960.000000,100400.000000,183.362564)}
{pt3dadd(193908.000000,201996.000000,100575.000000,192.995740)}
{pt3dadd(193860.000000,201996.000000,100975.000000,202.076612)}
{pt3dadd(193908.000000,202020.000000,101375.000000,206.216658)}
{pt3dadd(193872.000000,202092.000000,101700.000000,222.288150)}
{pt3dadd(193860.000000,202056.000000,101925.000000,223.414228)}
{pt3dadd(193800.000000,202008.000000,102150.000000,225.637866)}
{pt3dadd(193752.000000,201972.000000,102500.000000,230.369122)}
{pt3dadd(193704.000000,201840.000000,102775.000000,234.506816)}
{pt3dadd(193752.000000,201828.000000,103100.000000,251.259170)}
{pt3dadd(193752.000000,201732.000000,103450.000000,275.471996)}
{pt3dadd(193872.000000,201492.000000,103800.000000,294.470858)}
{pt3dadd(193800.000000,201444.000000,104125.000000,313.381490)}
{pt3dadd(193644.000000,201384.000000,104625.000000,342.722454)}
{pt3dadd(193512.000000,201276.000000,104925.000000,369.595208)}
{pt3dadd(193428.000000,201180.000000,105200.000000,412.531568)}
{pt3dadd(193488.000000,201036.000000,105400.000000,426.703016)}
{pt3dadd(193248.000000,200952.000000,105625.000000,426.703016)}
{pt3dadd(193032.000000,200520.000000,105850.000000,413.540430)}
{pt3dadd(192864.000000,200376.000000,106050.000000,367.345962)}
{pt3dadd(192504.000000,199980.000000,106200.000000,303.205358)}
{pt3dadd(192456.000000,199848.000000,106400.000000,263.658622)}
{pt3dadd(192348.000000,199644.000000,106525.000000,236.683990)}
{pt3dadd(192324.000000,199572.000000,106675.000000,210.946674)}
{pt3dadd(192180.000000,199212.000000,106850.000000,210.933702)}
{pt3dadd(192300.000000,199260.000000,107000.000000,201.300526)}
{pt3dadd(192204.000000,199248.000000,107150.000000,190.193774)}
{pt3dadd(192096.000000,199188.000000,107300.000000,181.197374)}
{pt3dadd(192084.000000,199092.000000,107450.000000,174.307900)}
{pt3dadd(192024.000000,199020.000000,107575.000000,156.287132)}
{pt3dadd(192108.000000,198960.000000,107725.000000,151.548454)}
{pt3dadd(192048.000000,199044.000000,107875.000000,149.637638)}
{pt3dadd(192132.000000,199044.000000,108000.000000,146.538038)}
{pt3dadd(192084.000000,199032.000000,108125.000000,151.127970)}
{pt3dadd(192084.000000,198972.000000,108250.000000,152.569066)}
{pt3dadd(192012.000000,199032.000000,108375.000000,152.563900)}
{pt3dadd(192000.000000,199044.000000,108475.000000,158.601068)}
{pt3dadd(191976.000000,199068.000000,108600.000000,155.658816)}
{pt3dadd(192024.000000,199056.000000,108750.000000,150.296722)}
{pt3dadd(191988.000000,199068.000000,108900.000000,151.952954)}
{pt3dadd(192012.000000,199104.000000,109025.000000,149.154934)}
{pt3dadd(192120.000000,199080.000000,109125.000000,147.567334)}
{pt3dadd(192060.000000,199080.000000,109275.000000,147.567334)}
{pt3dadd(192096.000000,199128.000000,109425.000000,146.164102)}
{pt3dadd(192096.000000,199140.000000,109575.000000,139.867526)}
{pt3dadd(192060.000000,199200.000000,109775.000000,145.909378)}
{pt3dadd(192012.000000,199140.000000,109975.000000,156.512414)}
{pt3dadd(191988.000000,199224.000000,110100.000000,170.149910)}
{pt3dadd(191988.000000,199332.000000,110275.000000,204.652244)}
{pt3dadd(191952.000000,199392.000000,110400.000000,236.218848)}
{pt3dadd(191892.000000,199512.000000,110550.000000,264.140768)}
{pt3dadd(191868.000000,199644.000000,110700.000000,284.363412)}
{pt3dadd(191820.000000,199788.000000,110800.000000,301.028168)}
{pt3dadd(191772.000000,199968.000000,110925.000000,285.373392)}
{pt3dadd(191760.000000,200148.000000,111075.000000,277.382610)}
{pt3dadd(191496.000000,200592.000000,111075.000000,265.143924)}
{pt3dadd(191256.000000,201216.000000,111100.000000,263.827764)}
{pt3dadd(190980.000000,202068.000000,111100.000000,256.577554)}
{pt3dadd(190680.000000,203076.000000,111100.000000,266.425186)}
{pt3dadd(190680.000000,203208.000000,110950.000000,274.993940)}
{pt3dadd(190584.000000,203472.000000,110850.000000,291.666394)}
{pt3dadd(190584.000000,203652.000000,110725.000000,299.384922)}
{pt3dadd(190548.000000,203772.000000,110600.000000,312.539132)}
{pt3dadd(190488.000000,203904.000000,110450.000000,324.759384)}
{pt3dadd(190476.000000,203916.000000,110350.000000,328.420904)}
{pt3dadd(190452.000000,204036.000000,110225.000000,312.482662)}
{pt3dadd(190440.000000,204180.000000,110075.000000,292.533860)}
{pt3dadd(190392.000000,204288.000000,109925.000000,275.705300)}
{pt3dadd(190344.000000,204432.000000,109775.000000,253.400692)}
{pt3dadd(190380.000000,204480.000000,109675.000000,245.059172)}
{pt3dadd(190356.000000,204552.000000,109525.000000,246.761800)}
{pt3dadd(190308.000000,204684.000000,109350.000000,244.418966)}
{pt3dadd(190260.000000,204816.000000,109200.000000,246.774772)}
{pt3dadd(190212.000000,204876.000000,109100.000000,253.019332)}
{pt3dadd(190212.000000,204924.000000,108925.000000,262.666272)}
{pt3dadd(190188.000000,204972.000000,108800.000000,280.167478)}
{pt3dadd(190164.000000,205092.000000,108675.000000,296.028620)}
{pt3dadd(190152.000000,205128.000000,108525.000000,309.575054)}
{pt3dadd(190068.000000,205224.000000,108375.000000,319.521844)}
{pt3dadd(190020.000000,205296.000000,108275.000000,322.661464)}
{pt3dadd(190008.000000,205320.000000,108175.000000,316.278264)}
{pt3dadd(189972.000000,205332.000000,108025.000000,322.689590)}
{pt3dadd(189924.000000,205428.000000,107900.000000,322.661464)}
{pt3dadd(189936.000000,205584.000000,107775.000000,325.804800)}
{pt3dadd(189804.000000,205716.000000,107550.000000,325.804800)}
{pt3dadd(189828.000000,205812.000000,107450.000000,317.284072)}
{pt3dadd(189828.000000,205884.000000,107350.000000,305.923192)}
{pt3dadd(189780.000000,205944.000000,107150.000000,290.062050)}
{pt3dadd(189732.000000,206004.000000,107025.000000,268.730178)}
{pt3dadd(189684.000000,206064.000000,106900.000000,245.378654)}
{pt3dadd(189636.000000,206124.000000,106775.000000,238.709364)}
{pt3dadd(189588.000000,206184.000000,106650.000000,227.797776)}
{pt3dadd(189540.000000,206244.000000,106550.000000,232.830024)}
{pt3dadd(189492.000000,206304.000000,106450.000000,238.551770)}
{pt3dadd(189444.000000,206364.000000,106350.000000,242.872174)}
{pt3dadd(189396.000000,206424.000000,106250.000000,244.515758)}
{pt3dadd(189348.000000,206484.000000,106150.000000,251.884298)}
{pt3dadd(189300.000000,206544.000000,106050.000000,251.646450)}
{pt3dadd(189324.000000,206592.000000,105950.000000,252.706124)}
{pt3dadd(189276.000000,206652.000000,105825.000000,262.780738)}
{pt3dadd(189228.000000,206712.000000,105750.000000,273.622624)}
{pt3dadd(189144.000000,206892.000000,105650.000000,283.890264)}
{pt3dadd(189108.000000,206952.000000,105525.000000,299.948272)}
{pt3dadd(189024.000000,207024.000000,105400.000000,332.310978)}
{pt3dadd(188844.000000,207204.000000,105275.000000,372.595812)}
{pt3dadd(188700.000000,207528.000000,105100.000000,405.605560)}
{pt3dadd(188640.000000,207720.000000,104975.000000,451.297848)}
{pt3dadd(188496.000000,207924.000000,104825.000000,503.503288)}
{pt3dadd(188448.000000,208092.000000,104725.000000,550.376440)}
{pt3dadd(188460.000000,208272.000000,104625.000000,584.037084)}
{pt3dadd(188544.000000,208536.000000,104525.000000,616.253312)}
{pt3dadd(188604.000000,208920.000000,104525.000000,672.273640)}
{pt3dadd(189000.000000,209352.000000,104525.000000,817.032340)}
{pt3dadd(189528.000000,209892.000000,104525.000000,901.904588)}
{pt3dadd(190200.000000,210480.000000,104525.000000,1065.461036)}
{pt3dadd(191376.000000,210672.000000,104525.000000,1250.429848)}
{pt3dadd(191844.000000,210516.000000,104525.000000,1393.357220)}
{pt3dadd(191856.000000,210492.000000,104250.000000,1452.590860)}
{pt3dadd(191796.000000,210504.000000,104125.000000,1541.979320)}
{pt3dadd(191868.000000,210492.000000,104000.000000,1534.456780)}
{pt3dadd(192252.000000,210252.000000,104000.000000,1485.779920)}
{pt3dadd(194388.000000,209136.000000,104000.000000,1489.762560)}
{pt3dadd(194568.000000,209100.000000,104000.000000,1416.912220)}
{pt3dadd(191736.000000,210588.000000,103725.000000,1443.881160)}
{pt3dadd(190884.000000,212172.000000,103725.000000,1507.440760)}
{pt3dadd(191520.000000,210408.000000,103275.000000,1516.385280)}
{pt3dadd(193356.000000,209556.000000,103275.000000,1419.005840)}
{pt3dadd(194712.000000,209064.000000,103200.000000,1491.856180)}
{pt3dadd(195276.000000,208608.000000,103200.000000,1503.119140)}
{pt3dadd(192336.000000,210072.000000,102800.000000,1405.386320)}
{pt3dadd(191376.000000,210600.000000,102800.000000,1522.179500)}
{pt3dadd(190164.000000,212592.000000,102800.000000,1701.755680)}
{pt3dadd(191820.000000,210192.000000,102450.000000,1527.983986)}
{pt3dadd(191808.000000,210132.000000,102100.000000,1526.136046)}
{pt3dadd(194004.000000,207660.000000,102100.000000,1552.903166)}
{pt3dadd(192204.000000,210372.000000,101975.000000,1451.359886)}
{pt3dadd(190188.000000,212448.000000,101975.000000,1204.833174)}
{pt3dadd(191436.000000,210456.000000,101575.000000,1289.818148)}
{pt3dadd(193800.000000,207984.000000,101575.000000,1068.514148)}
{pt3dadd(191376.000000,210492.000000,101225.000000,1010.320808)}
{pt3dadd(188736.000000,213084.000000,101225.000000,972.423008)}
{pt3dadd(191928.000000,210192.000000,100950.000000,954.635760)}
{pt3dadd(191256.000000,210168.000000,100525.000000,903.774840)}
{pt3dadd(189504.000000,212532.000000,100525.000000,957.344080)}
{pt3dadd(191496.000000,209796.000000,100250.000000,883.184920)}
{pt3dadd(191040.000000,210252.000000,99925.000000,754.639240)}
{pt3dadd(190944.000000,210252.000000,99650.000000,716.223420)}
{pt3dadd(190800.000000,210432.000000,99375.000000,597.545033)}
{pt3dadd(190656.000000,210420.000000,99175.000000,462.070900)}

{create adhoc99}
{access adhoc99}
{connect adhoc99(1), adhoc1(0)}
{nseg = 1}
{strdef color color = "White"}
{pt3dclear()}
{pt3dadd(151764.000000,133428.000000,174550.000000,39.934990)}
{pt3dadd(151188.000000,133224.000000,175625.000000,29.785660)}
{pt3dadd(151008.000000,133152.000000,176325.000000,40.873950)}
{pt3dadd(150300.000000,133500.000000,177125.000000,38.837591)}
{pt3dadd(150204.000000,133416.000000,177300.000000,57.506386)}

{create adhoc100}
{access adhoc100}
{connect adhoc100(1), adhoc99(0)}
{nseg = 1}
{strdef color color = "White"}
{pt3dclear()}
{pt3dadd(150204.000000,133416.000000,177300.000000,57.506386)}
{pt3dadd(149016.000000,135288.000000,176975.000000,24.126844)}
{pt3dadd(148584.000000,135624.000000,176625.000000,17.055996)}
{pt3dadd(148908.000000,135372.000000,176325.000000,4.799816)}
{pt3dadd(148668.000000,135504.000000,175925.000000,6.449724)}

{create adhoc101}
{access adhoc101}
{connect adhoc101(1), adhoc99(0)}
{nseg = 1}
{strdef color color = "White"}
{pt3dclear()}
{pt3dadd(150204.000000,133416.000000,177300.000000,57.506386)}
{pt3dadd(150312.000000,131052.000000,179300.000000,28.913006)}
{pt3dadd(151524.000000,130404.000000,179275.000000,27.232202)}
{pt3dadd(151980.000000,130092.000000,179425.000000,23.717922)}
{pt3dadd(151884.000000,129888.000000,179500.000000,29.785660)}
{pt3dadd(151896.000000,129576.000000,179925.000000,39.934990)}

{create adhoc102}
{access adhoc102}
{connect adhoc102(1), adhoc101(0)}
{nseg = 1}
{strdef color color = "White"}
{pt3dclear()}
{pt3dadd(151896.000000,129576.000000,179925.000000,39.934990)}
{pt3dadd(154140.000000,129564.000000,180850.000000,18.269712)}
{pt3dadd(154368.000000,129588.000000,180975.000000,11.561827)}
{pt3dadd(154620.000000,129672.000000,180900.000000,6.249659)}
{pt3dadd(154812.000000,129828.000000,180875.000000,3.874829)}
{pt3dadd(155028.000000,129804.000000,180900.000000,3.874829)}
{pt3dadd(155220.000000,129864.000000,180850.000000,3.874829)}
{pt3dadd(155400.000000,129912.000000,180775.000000,4.606785)}
{pt3dadd(155580.000000,129924.000000,180575.000000,2.678452)}
{pt3dadd(155820.000000,129972.000000,180075.000000,3.464087)}
{pt3dadd(155796.000000,129984.000000,179900.000000,3.732480)}

{create adhoc103}
{access adhoc103}
{connect adhoc103(1), adhoc101(0)}
{nseg = 1}
{strdef color color = "White"}
{pt3dclear()}
{pt3dadd(151896.000000,129576.000000,179925.000000,39.934990)}
{pt3dadd(152232.000000,129084.000000,180150.000000,24.460994)}
{pt3dadd(152136.000000,128760.000000,180225.000000,18.828351)}
{pt3dadd(152496.000000,128412.000000,180675.000000,12.131298)}
{pt3dadd(152808.000000,128076.000000,180325.000000,9.069499)}
{pt3dadd(152784.000000,127908.000000,180325.000000,6.449724)}

{create adhoc104}
{access adhoc104}
{connect adhoc104(1), adhoc103(0)}
{nseg = 1}
{strdef color color = "White"}
{pt3dclear()}
{pt3dadd(152784.000000,127908.000000,180325.000000,6.449724)}
{pt3dadd(153984.000000,127884.000000,179250.000000,10.353417)}
{pt3dadd(154452.000000,127596.000000,178700.000000,6.812050)}
{pt3dadd(155880.000000,126648.000000,178575.000000,10.144211)}
{pt3dadd(156144.000000,126552.000000,179200.000000,5.822105)}
{pt3dadd(156492.000000,126528.000000,179250.000000,7.751130)}
{pt3dadd(156708.000000,126540.000000,179375.000000,8.689477)}
{pt3dadd(156888.000000,126552.000000,179300.000000,6.278953)}
{pt3dadd(157068.000000,126516.000000,179350.000000,6.191735)}

{create adhoc105}
{access adhoc105}
{connect adhoc105(1), adhoc103(0)}
{nseg = 1}
{strdef color color = "White"}
{pt3dclear()}
{pt3dadd(152784.000000,127908.000000,180325.000000,6.449724)}
{pt3dadd(153660.000000,127632.000000,182225.000000,339.198282)}
{pt3dadd(153876.000000,127368.000000,182800.000000,1000.000000)}

{create adhoc106}
{access adhoc106}
{connect adhoc106(1), adhoc99(0)}
{nseg = 1}
{strdef color color = "White"}
{pt3dclear()}
{pt3dadd(150204.000000,133416.000000,177300.000000,57.506386)}
{pt3dadd(149928.000000,133800.000000,177825.000000,54.311587)}
{pt3dadd(149712.000000,133728.000000,178150.000000,57.506386)}

{create adhoc107}
{access adhoc107}
{connect adhoc107(1), adhoc106(0)}
{nseg = 1}
{strdef color color = "White"}
{pt3dclear()}
{pt3dadd(149712.000000,133728.000000,178150.000000,57.506386)}
{pt3dadd(146304.000000,134820.000000,178150.000000,37.657217)}
{pt3dadd(145956.000000,134976.000000,178200.000000,27.732632)}

{create adhoc108}
{access adhoc108}
{connect adhoc108(1), adhoc107(0)}
{nseg = 1}
{strdef color color = "White"}
{pt3dclear()}
{pt3dadd(145956.000000,134976.000000,178200.000000,27.732632)}
{pt3dadd(145836.000000,138888.000000,177125.000000,18.988421)}
{pt3dadd(145320.000000,139188.000000,176700.000000,22.589846)}
{pt3dadd(145104.000000,139536.000000,176725.000000,19.161322)}
{pt3dadd(144960.000000,139992.000000,175725.000000,16.048977)}

{create adhoc109}
{access adhoc109}
{connect adhoc109(1), adhoc108(0)}
{nseg = 1}
{strdef color color = "White"}
{pt3dclear()}
{pt3dadd(144960.000000,139992.000000,175725.000000,16.048977)}
{pt3dadd(144228.000000,138288.000000,175700.000000,13.245028)}
{pt3dadd(143688.000000,138000.000000,175250.000000,8.547017)}
{pt3dadd(144024.000000,137964.000000,174925.000000,7.566246)}
{pt3dadd(144492.000000,137568.000000,174525.000000,4.367372)}
{pt3dadd(145128.000000,137424.000000,174150.000000,4.813868)}
{pt3dadd(145464.000000,137400.000000,173525.000000,7.023113)}
{pt3dadd(145920.000000,137712.000000,173125.000000,3.732480)}

{create adhoc110}
{access adhoc110}
{connect adhoc110(1), adhoc108(0)}
{nseg = 1}
{strdef color color = "White"}
{pt3dclear()}
{pt3dadd(144960.000000,139992.000000,175725.000000,16.048977)}
{pt3dadd(144900.000000,140148.000000,175325.000000,13.553168)}
{pt3dadd(144732.000000,140688.000000,174825.000000,12.283655)}
{pt3dadd(145536.000000,141216.000000,174075.000000,9.969655)}
{pt3dadd(145440.000000,141624.000000,173525.000000,8.412582)}
{pt3dadd(145596.000000,141528.000000,173300.000000,4.478975)}

{create adhoc111}
{access adhoc111}
{connect adhoc111(1), adhoc107(0)}
{nseg = 1}
{strdef color color = "White"}
{pt3dclear()}
{pt3dadd(145956.000000,134976.000000,178200.000000,27.732632)}
{pt3dadd(145584.000000,135000.000000,178125.000000,16.163801)}
{pt3dadd(145380.000000,135084.000000,178350.000000,12.817944)}
{pt3dadd(145152.000000,135108.000000,178525.000000,5.699439)}
{pt3dadd(145080.000000,135156.000000,178675.000000,6.310715)}

{create adhoc112}
{access adhoc112}
{connect adhoc112(1), adhoc106(0)}
{nseg = 1}
{strdef color color = "White"}
{pt3dclear()}
{pt3dadd(149712.000000,133728.000000,178150.000000,57.506386)}
{pt3dadd(149052.000000,133776.000000,179000.000000,57.506386)}
{pt3dadd(148032.000000,134160.000000,179575.000000,54.311587)}
{pt3dadd(147300.000000,134652.000000,180250.000000,47.921990)}

{create adhoc113}
{access adhoc113}
{connect adhoc113(1), adhoc112(0)}
{nseg = 1}
{strdef color color = "White"}
{pt3dclear()}
{pt3dadd(147300.000000,134652.000000,180250.000000,47.921990)}
{pt3dadd(148992.000000,136296.000000,180350.000000,24.177506)}
{pt3dadd(149412.000000,136860.000000,180825.000000,15.106503)}
{pt3dadd(149592.000000,137112.000000,181100.000000,12.177937)}
{pt3dadd(149928.000000,137496.000000,181300.000000,7.855832)}
{pt3dadd(150240.000000,138168.000000,181575.000000,7.855832)}
{pt3dadd(150516.000000,138288.000000,181900.000000,7.855832)}
{pt3dadd(150852.000000,138456.000000,182125.000000,17.140230)}
{pt3dadd(151104.000000,138324.000000,182100.000000,20.068796)}
{pt3dadd(151368.000000,138264.000000,181975.000000,24.390901)}
{pt3dadd(151800.000000,138324.000000,182100.000000,39.651502)}
{pt3dadd(152004.000000,138144.000000,182300.000000,23.110527)}

{create adhoc114}
{access adhoc114}
{connect adhoc114(1), adhoc113(0)}
{nseg = 1}
{strdef color color = "White"}
{pt3dclear()}
{pt3dadd(152004.000000,138144.000000,182300.000000,23.110527)}
{pt3dadd(152112.000000,138444.000000,181100.000000,15.133591)}
{pt3dadd(152316.000000,138408.000000,180925.000000,10.009972)}
{pt3dadd(152472.000000,138336.000000,180925.000000,7.739669)}

{create adhoc115}
{access adhoc115}
{connect adhoc115(1), adhoc113(0)}
{nseg = 1}
{strdef color color = "White"}
{pt3dclear()}
{pt3dadd(152004.000000,138144.000000,182300.000000,23.110527)}
{pt3dadd(152304.000000,138168.000000,182750.000000,23.110527)}

{create adhoc116}
{access adhoc116}
{connect adhoc116(1), adhoc112(0)}
{nseg = 1}
{strdef color color = "White"}
{pt3dclear()}
{pt3dadd(147300.000000,134652.000000,180250.000000,47.921990)}
{pt3dadd(146712.000000,134532.000000,180675.000000,51.116789)}
{pt3dadd(145980.000000,134508.000000,181275.000000,51.116789)}
{pt3dadd(145788.000000,134712.000000,182050.000000,47.921990)}

{create adhoc117}
{access adhoc117}
{connect adhoc117(1), adhoc116(0)}
{nseg = 1}
{strdef color color = "White"}
{pt3dclear()}
{pt3dadd(145788.000000,134712.000000,182050.000000,47.921990)}
{pt3dadd(145800.000000,135972.000000,182075.000000,24.419523)}
{pt3dadd(145920.000000,136200.000000,181975.000000,9.287602)}

{create adhoc118}
{access adhoc118}
{connect adhoc118(1), adhoc116(0)}
{nseg = 1}
{strdef color color = "White"}
{pt3dclear()}
{pt3dadd(145788.000000,134712.000000,182050.000000,47.921990)}
{pt3dadd(146160.000000,134436.000000,182775.000000,33.279160)}

{create adhoc119}
{access adhoc119}
{connect adhoc119(1), adhoc116(0)}
{nseg = 1}
{strdef color color = "White"}
{pt3dclear()}
{pt3dadd(145788.000000,134712.000000,182050.000000,47.921990)}
{pt3dadd(142536.000000,134928.000000,182050.000000,27.732632)}

{create adhoc120}
{access adhoc120}
{connect adhoc120(1), adhoc119(0)}
{nseg = 1}
{strdef color color = "White"}
{pt3dclear()}
{pt3dadd(142536.000000,134928.000000,182050.000000,27.732632)}
{pt3dadd(141168.000000,136272.000000,182050.000000,18.988421)}
{pt3dadd(140952.000000,136608.000000,181975.000000,11.993053)}
{pt3dadd(140772.000000,137076.000000,181825.000000,9.527930)}
{pt3dadd(140712.000000,137376.000000,181875.000000,4.281404)}
{pt3dadd(139836.000000,137364.000000,180825.000000,4.281404)}
{pt3dadd(139560.000000,138108.000000,180500.000000,4.281404)}
{pt3dadd(139308.000000,138192.000000,180475.000000,10.637236)}
{pt3dadd(138792.000000,138348.000000,180050.000000,14.211664)}
{pt3dadd(138480.000000,138384.000000,179500.000000,23.496062)}
{pt3dadd(138048.000000,138216.000000,178950.000000,38.160103)}
{pt3dadd(137868.000000,138336.000000,178450.000000,47.921990)}

{create adhoc121}
{access adhoc121}
{connect adhoc121(1), adhoc120(0)}
{nseg = 1}
{strdef color color = "White"}
{pt3dclear()}
{pt3dadd(137868.000000,138336.000000,178450.000000,47.921990)}
{pt3dadd(137796.000000,137832.000000,177725.000000,29.785660)}
{pt3dadd(137280.000000,137400.000000,177050.000000,26.158394)}
{pt3dadd(136512.000000,136896.000000,176475.000000,24.560994)}
{pt3dadd(135732.000000,136284.000000,175825.000000,27.123327)}
{pt3dadd(135324.000000,136080.000000,175350.000000,39.934990)}

{create adhoc122}
{access adhoc122}
{connect adhoc122(1), adhoc121(0)}
{nseg = 1}
{strdef color color = "White"}
{pt3dclear()}
{pt3dadd(135324.000000,136080.000000,175350.000000,39.934990)}
{pt3dadd(135888.000000,135264.000000,174450.000000,30.380585)}
{pt3dadd(136728.000000,135528.000000,174050.000000,23.488512)}
{pt3dadd(136752.000000,135504.000000,173975.000000,19.258772)}

{create adhoc123}
{access adhoc123}
{connect adhoc123(1), adhoc121(0)}
{nseg = 1}
{strdef color color = "White"}
{pt3dclear()}
{pt3dadd(135324.000000,136080.000000,175350.000000,39.934990)}
{pt3dadd(136152.000000,133812.000000,175625.000000,24.010981)}
{pt3dadd(136320.000000,133224.000000,176025.000000,13.176012)}
{pt3dadd(136296.000000,133164.000000,176225.000000,7.430082)}

{create adhoc124}
{access adhoc124}
{connect adhoc124(1), adhoc120(0)}
{nseg = 1}
{strdef color color = "White"}
{pt3dclear()}
{pt3dadd(137868.000000,138336.000000,178450.000000,47.921990)}
{pt3dadd(138108.000000,141024.000000,178400.000000,27.567050)}
{pt3dadd(138276.000000,141180.000000,179075.000000,20.781981)}
{pt3dadd(138180.000000,141624.000000,179475.000000,7.569586)}
{pt3dadd(138204.000000,141648.000000,179825.000000,5.159780)}

{create adhoc125}
{access adhoc125}
{connect adhoc125(1), adhoc119(0)}
{nseg = 1}
{strdef color color = "White"}
{pt3dclear()}
{pt3dadd(142536.000000,134928.000000,182050.000000,27.732632)}
{pt3dadd(141384.000000,133860.000000,182100.000000,18.988421)}
{pt3dadd(141120.000000,133728.000000,181625.000000,11.993053)}
{pt3dadd(140844.000000,133632.000000,181500.000000,9.656322)}
{pt3dadd(140568.000000,133392.000000,181325.000000,5.184749)}
{pt3dadd(140412.000000,133452.000000,181300.000000,7.641249)}
{pt3dadd(140172.000000,133416.000000,181150.000000,5.374770)}

{create adhoc126}
{access adhoc126}
{connect adhoc126(1), adhoc116(0)}
{nseg = 1}
{strdef color color = "White"}
{pt3dclear()}
{pt3dadd(145788.000000,134712.000000,182050.000000,47.921990)}
{pt3dadd(146760.000000,132192.000000,182300.000000,25.718207)}
{pt3dadd(146916.000000,131916.000000,182625.000000,16.030924)}
{pt3dadd(146700.000000,131652.000000,182475.000000,11.068632)}
{pt3dadd(147000.000000,131268.000000,182075.000000,5.822105)}
{pt3dadd(147096.000000,130932.000000,182025.000000,5.822105)}
{pt3dadd(147060.000000,130644.000000,181900.000000,5.822105)}
{pt3dadd(146928.000000,130284.000000,181825.000000,8.731901)}
{pt3dadd(145788.000000,129732.000000,181325.000000,4.409795)}
{pt3dadd(145392.000000,129420.000000,181100.000000,4.409795)}
{pt3dadd(145296.000000,129012.000000,180725.000000,10.765627)}
{pt3dadd(145092.000000,128760.000000,180775.000000,18.452625)}
{pt3dadd(144876.000000,128448.000000,180500.000000,24.904717)}
{pt3dadd(144696.000000,128220.000000,180225.000000,39.934990)}

{create adhoc127}
{access adhoc127}
{connect adhoc127(1), adhoc126(0)}
{nseg = 1}
{strdef color color = "White"}
{pt3dclear()}
{pt3dadd(144696.000000,128220.000000,180225.000000,39.934990)}
{pt3dadd(144324.000000,127596.000000,181175.000000,23.055874)}
{pt3dadd(143952.000000,127272.000000,181575.000000,20.313150)}
{pt3dadd(143976.000000,127032.000000,181500.000000,11.299376)}
{pt3dadd(144204.000000,126672.000000,181600.000000,9.287602)}

{create adhoc128}
{access adhoc128}
{connect adhoc128(1), adhoc126(0)}
{nseg = 1}
{strdef color color = "White"}
{pt3dclear()}
{pt3dadd(144696.000000,128220.000000,180225.000000,39.934990)}
{pt3dadd(144720.000000,128004.000000,179575.000000,23.055874)}
{pt3dadd(144516.000000,127644.000000,178925.000000,14.433524)}
{pt3dadd(143832.000000,127440.000000,178400.000000,9.121356)}
{pt3dadd(144096.000000,127452.000000,177725.000000,4.864774)}
{pt3dadd(144624.000000,127956.000000,177150.000000,7.107957)}
{pt3dadd(145080.000000,128256.000000,176750.000000,6.449724)}
