# Supplementary material for: Full reconstruction of large lobula plate tangential cells in Drosophila from a 3D EM dataset
Source: PLoS One. 2018 Nov 28;13(11):e0207828. doi: 10.1371/journal.pone.0207828 (PMC6261601; doi:10.1371/journal.pone.0207828)
Supplement: S1 Dataset — (ZIP) [file pone.0207828.s001.zip › Diameter hoc/Zelle40_fertig.hoc0001.hoc]

/* created with convertKnossosNmlToHoc.m */

{create adhoc1}
{access adhoc1}
{nseg = 1}
{strdef color color = "White"}
{pt3dclear()}
{pt3dadd(173328.000000,104760.000000,49125.000000,70.161514)}
{pt3dadd(173352.000000,104772.000000,49075.000000,83.155471)}
{pt3dadd(173388.000000,104784.000000,49000.000000,82.420249)}
{pt3dadd(173352.000000,104796.000000,48875.000000,85.444298)}
{pt3dadd(173340.000000,104844.000000,48825.000000,85.444298)}
{pt3dadd(173376.000000,105060.000000,48800.000000,81.373588)}
{pt3dadd(173424.000000,105384.000000,48725.000000,89.902974)}
{pt3dadd(173424.000000,105504.000000,48700.000000,99.306622)}
{pt3dadd(173412.000000,105672.000000,48675.000000,111.422420)}
{pt3dadd(173412.000000,105732.000000,48650.000000,119.566068)}
{pt3dadd(173232.000000,105816.000000,48700.000000,132.615150)}
{pt3dadd(173172.000000,105996.000000,48825.000000,135.075150)}
{pt3dadd(173100.000000,106020.000000,49050.000000,135.075150)}
{pt3dadd(172932.000000,106116.000000,49250.000000,132.363000)}
{pt3dadd(172836.000000,106140.000000,49425.000000,134.946000)}
{pt3dadd(172692.000000,106176.000000,49600.000000,133.623000)}
{pt3dadd(172512.000000,106296.000000,49925.000000,134.946000)}
{pt3dadd(172428.000000,106380.000000,50125.000000,134.946000)}
{pt3dadd(172188.000000,106548.000000,50275.000000,133.686000)}
{pt3dadd(171996.000000,106776.000000,50550.000000,129.903000)}
{pt3dadd(171984.000000,106800.000000,50775.000000,126.300142)}
{pt3dadd(171900.000000,106920.000000,50975.000000,118.262002)}
{pt3dadd(171828.000000,107076.000000,51175.000000,110.606630)}
{pt3dadd(171720.000000,107064.000000,51325.000000,104.211258)}
{pt3dadd(171624.000000,107040.000000,51550.000000,98.120427)}
{pt3dadd(171612.000000,107076.000000,51725.000000,94.067913)}
{pt3dadd(171660.000000,106956.000000,51875.000000,92.232222)}
{pt3dadd(171696.000000,107028.000000,52000.000000,91.336763)}
{pt3dadd(171660.000000,106980.000000,52200.000000,90.441304)}
{pt3dadd(171624.000000,106896.000000,52400.000000,91.336763)}
{pt3dadd(171624.000000,106860.000000,52575.000000,92.276995)}
{pt3dadd(171564.000000,106812.000000,52700.000000,94.112686)}
{pt3dadd(171504.000000,106764.000000,52825.000000,95.008145)}
{pt3dadd(171408.000000,106728.000000,52950.000000,94.155328)}
{pt3dadd(171348.000000,106656.000000,53150.000000,93.259869)}
{pt3dadd(171312.000000,106632.000000,53300.000000,93.259869)}
{pt3dadd(171120.000000,106500.000000,53450.000000,90.571361)}
{pt3dadd(170892.000000,106512.000000,53650.000000,98.226733)}
{pt3dadd(170712.000000,106500.000000,53825.000000,107.630381)}
{pt3dadd(170508.000000,106452.000000,54000.000000,120.351972)}
{pt3dadd(170292.000000,106476.000000,54175.000000,155.615552)}
{pt3dadd(170052.000000,106620.000000,54300.000000,199.206000)}
{pt3dadd(169860.000000,106776.000000,54425.000000,243.810000)}
{pt3dadd(169740.000000,106776.000000,54675.000000,303.234000)}

{create adhoc2}
{access adhoc2}
{connect adhoc2(1), adhoc1(0)}
{nseg = 1}
{strdef color color = "White"}
{pt3dclear()}
{pt3dadd(169740.000000,106776.000000,54675.000000,303.234000)}
{pt3dadd(169692.000000,106920.000000,54650.000000,318.648413)}
{pt3dadd(169476.000000,107064.000000,54600.000000,278.315202)}
{pt3dadd(169272.000000,107148.000000,54475.000000,260.768954)}
{pt3dadd(169068.000000,107232.000000,54625.000000,234.953994)}
{pt3dadd(168996.000000,107304.000000,54625.000000,212.322994)}
{pt3dadd(168924.000000,107424.000000,54700.000000,201.522192)}
{pt3dadd(168840.000000,107508.000000,54725.000000,203.383784)}
{pt3dadd(168684.000000,107640.000000,54750.000000,199.376704)}
{pt3dadd(168564.000000,107736.000000,54725.000000,203.584140)}
{pt3dadd(168336.000000,107868.000000,54675.000000,197.994926)}
{pt3dadd(168324.000000,108048.000000,54650.000000,197.994926)}
{pt3dadd(168312.000000,108228.000000,54550.000000,196.133334)}
{pt3dadd(168324.000000,108432.000000,54575.000000,192.498792)}
{pt3dadd(168252.000000,108636.000000,54550.000000,192.498792)}
{pt3dadd(168168.000000,108792.000000,54525.000000,200.140414)}
{pt3dadd(168060.000000,109020.000000,54500.000000,206.302522)}
{pt3dadd(168012.000000,109212.000000,54450.000000,212.171194)}
{pt3dadd(167904.000000,109404.000000,54450.000000,219.812816)}
{pt3dadd(167808.000000,109548.000000,54400.000000,224.451510)}
{pt3dadd(167724.000000,109692.000000,54375.000000,228.869318)}
{pt3dadd(167580.000000,109872.000000,54350.000000,228.869318)}
{pt3dadd(167640.000000,110052.000000,54300.000000,240.777206)}
{pt3dadd(167508.000000,110220.000000,54375.000000,258.323454)}
{pt3dadd(167556.000000,110364.000000,54400.000000,269.075980)}
{pt3dadd(167604.000000,110544.000000,54450.000000,295.274192)}
{pt3dadd(167412.000000,110712.000000,54475.000000,313.697756)}
{pt3dadd(167388.000000,110856.000000,54525.000000,322.368460)}
{pt3dadd(167400.000000,111000.000000,54575.000000,319.480520)}
{pt3dadd(167436.000000,111144.000000,54650.000000,308.727994)}
{pt3dadd(167496.000000,111288.000000,54750.000000,284.905696)}
{pt3dadd(167568.000000,111468.000000,54825.000000,291.432808)}
{pt3dadd(167568.000000,111588.000000,54825.000000,280.142654)}
{pt3dadd(167640.000000,111720.000000,54925.000000,280.142654)}
{pt3dadd(167664.000000,111840.000000,54975.000000,288.007240)}
{pt3dadd(167676.000000,111924.000000,55025.000000,298.759766)}
{pt3dadd(167916.000000,112044.000000,55050.000000,278.447784)}
{pt3dadd(167928.000000,112140.000000,55175.000000,275.953068)}
{pt3dadd(168060.000000,112248.000000,55250.000000,263.449788)}
{pt3dadd(168096.000000,112380.000000,55300.000000,250.946508)}
{pt3dadd(168192.000000,112524.000000,55350.000000,227.531588)}
{pt3dadd(168384.000000,112668.000000,55375.000000,208.268074)}
{pt3dadd(168300.000000,112800.000000,55450.000000,187.545950)}
{pt3dadd(168276.000000,113040.000000,55450.000000,176.060780)}
{pt3dadd(168276.000000,113244.000000,55525.000000,173.905752)}
{pt3dadd(168276.000000,113400.000000,55550.000000,172.132802)}
{pt3dadd(168276.000000,113592.000000,55575.000000,193.891032)}
{pt3dadd(168072.000000,113760.000000,55575.000000,228.398026)}
{pt3dadd(167976.000000,114000.000000,55675.000000,249.636056)}
{pt3dadd(167760.000000,114216.000000,55825.000000,254.053864)}
{pt3dadd(167664.000000,114420.000000,55925.000000,276.353794)}
{pt3dadd(167616.000000,114612.000000,56050.000000,281.723664)}
{pt3dadd(167472.000000,114972.000000,56125.000000,281.723664)}
{pt3dadd(167496.000000,115176.000000,56250.000000,281.723664)}
{pt3dadd(167568.000000,115512.000000,56400.000000,281.723664)}
{pt3dadd(167604.000000,115524.000000,56525.000000,284.611604)}
{pt3dadd(167652.000000,115812.000000,56650.000000,287.499544)}
{pt3dadd(167724.000000,116088.000000,56850.000000,287.499544)}
{pt3dadd(167700.000000,116184.000000,57000.000000,306.207676)}
{pt3dadd(167928.000000,116508.000000,57150.000000,325.552420)}
{pt3dadd(167940.000000,116832.000000,57350.000000,319.914060)}
{pt3dadd(168036.000000,116964.000000,57525.000000,298.360732)}
{pt3dadd(168060.000000,117108.000000,57650.000000,277.782140)}
{pt3dadd(168096.000000,117528.000000,57775.000000,249.321148)}
{pt3dadd(168108.000000,117756.000000,57925.000000,223.506188)}
{pt3dadd(168180.000000,117888.000000,58025.000000,213.753328)}
{pt3dadd(168252.000000,118176.000000,58150.000000,219.915436)}
{pt3dadd(168228.000000,118248.000000,58275.000000,215.908356)}
{pt3dadd(168360.000000,118404.000000,58425.000000,199.824926)}
{pt3dadd(168396.000000,118536.000000,58550.000000,204.032362)}
{pt3dadd(168564.000000,118680.000000,58675.000000,199.824926)}
{pt3dadd(168624.000000,118980.000000,58825.000000,197.669898)}
{pt3dadd(168744.000000,119196.000000,58950.000000,201.676978)}
{pt3dadd(168804.000000,119472.000000,58950.000000,233.151628)}
{pt3dadd(168864.000000,119700.000000,58950.000000,248.542848)}
{pt3dadd(168936.000000,120072.000000,59050.000000,265.253564)}
{pt3dadd(168960.000000,120324.000000,59175.000000,249.936012)}
{pt3dadd(168924.000000,120480.000000,59325.000000,234.618460)}
{pt3dadd(168924.000000,120708.000000,59475.000000,209.430590)}
{pt3dadd(168888.000000,120828.000000,59600.000000,191.884342)}
{pt3dadd(168804.000000,121104.000000,59725.000000,173.218954)}
{pt3dadd(168696.000000,121356.000000,59850.000000,182.667834)}
{pt3dadd(168408.000000,121596.000000,60000.000000,197.985386)}
{pt3dadd(168252.000000,121704.000000,60150.000000,203.574600)}
{pt3dadd(168072.000000,121896.000000,60275.000000,199.567520)}
{pt3dadd(168036.000000,122076.000000,60450.000000,192.636344)}
{pt3dadd(167892.000000,122196.000000,60575.000000,192.636344)}
{pt3dadd(167820.000000,122268.000000,60700.000000,295.489564)}
{pt3dadd(167640.000000,122616.000000,60900.000000,368.800014)}
{pt3dadd(167364.000000,122928.000000,60900.000000,495.907077)}
{pt3dadd(167148.000000,123348.000000,60900.000000,571.792970)}

{create adhoc3}
{access adhoc3}
{connect adhoc3(1), adhoc2(0)}
{nseg = 1}
{strdef color color = "White"}
{pt3dclear()}
{pt3dadd(167148.000000,123348.000000,60900.000000,571.792970)}
{pt3dadd(166932.000000,123408.000000,60700.000000,489.274170)}
{pt3dadd(166800.000000,123744.000000,60525.000000,461.364174)}
{pt3dadd(166764.000000,123804.000000,60375.000000,420.722152)}
{pt3dadd(166716.000000,123876.000000,60125.000000,412.391714)}
{pt3dadd(166668.000000,123936.000000,60050.000000,386.467904)}
{pt3dadd(166680.000000,124008.000000,59900.000000,370.510192)}
{pt3dadd(166680.000000,124128.000000,59700.000000,337.850867)}
{pt3dadd(166692.000000,124212.000000,59550.000000,288.794300)}

{create adhoc4}
{access adhoc4}
{connect adhoc4(1), adhoc3(0)}
{nseg = 1}
{strdef color color = "White"}
{pt3dclear()}
{pt3dadd(166692.000000,124212.000000,59550.000000,288.794300)}
{pt3dadd(166728.000000,124404.000000,59600.000000,254.847857)}
{pt3dadd(166800.000000,124548.000000,59675.000000,214.462124)}
{pt3dadd(166824.000000,124728.000000,59575.000000,190.473674)}
{pt3dadd(166836.000000,124896.000000,59475.000000,179.672872)}
{pt3dadd(166932.000000,125052.000000,59450.000000,171.649172)}
{pt3dadd(166896.000000,125208.000000,59400.000000,176.972234)}
{pt3dadd(166956.000000,125352.000000,59375.000000,190.237378)}
{pt3dadd(167076.000000,125520.000000,59450.000000,191.925898)}
{pt3dadd(166968.000000,125652.000000,59350.000000,183.463186)}
{pt3dadd(166968.000000,125784.000000,59400.000000,185.324778)}
{pt3dadd(166980.000000,125928.000000,59500.000000,185.324778)}
{pt3dadd(167004.000000,126072.000000,59500.000000,181.508514)}
{pt3dadd(166956.000000,126204.000000,59475.000000,181.508514)}
{pt3dadd(166920.000000,126336.000000,59475.000000,191.925898)}
{pt3dadd(166956.000000,126456.000000,59475.000000,188.291356)}
{pt3dadd(166968.000000,126600.000000,59500.000000,194.453464)}
{pt3dadd(166860.000000,126708.000000,59500.000000,208.049304)}
{pt3dadd(166860.000000,126780.000000,59550.000000,219.237050)}
{pt3dadd(166836.000000,126888.000000,59575.000000,254.138600)}

{create adhoc5}
{access adhoc5}
{connect adhoc5(1), adhoc4(0)}
{nseg = 1}
{strdef color color = "White"}
{pt3dclear()}
{pt3dadd(166836.000000,126888.000000,59575.000000,254.138600)}
{pt3dadd(166740.000000,127032.000000,59700.000000,255.590867)}
{pt3dadd(166704.000000,127152.000000,59725.000000,238.104760)}
{pt3dadd(166692.000000,127284.000000,59675.000000,230.377592)}
{pt3dadd(166560.000000,127392.000000,59750.000000,225.959784)}
{pt3dadd(166464.000000,127512.000000,59925.000000,216.206924)}
{pt3dadd(166404.000000,127596.000000,60025.000000,209.736708)}
{pt3dadd(166116.000000,127740.000000,60250.000000,213.552972)}
{pt3dadd(165876.000000,127812.000000,60550.000000,207.684300)}
{pt3dadd(165600.000000,127884.000000,60675.000000,203.677220)}
{pt3dadd(165444.000000,127908.000000,60825.000000,189.052400)}
{pt3dadd(165300.000000,128028.000000,60925.000000,170.861398)}
{pt3dadd(165180.000000,128040.000000,61050.000000,157.596254)}
{pt3dadd(165060.000000,128076.000000,61175.000000,152.526670)}
{pt3dadd(164928.000000,128040.000000,61200.000000,147.203608)}
{pt3dadd(164808.000000,128004.000000,61350.000000,150.343258)}
{pt3dadd(164700.000000,128052.000000,61650.000000,164.717996)}
{pt3dadd(164544.000000,128088.000000,61800.000000,176.028468)}
{pt3dadd(164400.000000,128028.000000,61975.000000,191.384532)}
{pt3dadd(164292.000000,127968.000000,62250.000000,196.707594)}
{pt3dadd(164196.000000,128064.000000,62525.000000,206.037736)}
{pt3dadd(164004.000000,128088.000000,62725.000000,211.906408)}
{pt3dadd(163824.000000,128112.000000,62925.000000,215.913488)}
{pt3dadd(163668.000000,128148.000000,63125.000000,205.627008)}
{pt3dadd(163560.000000,128136.000000,63325.000000,218.922526)}
{pt3dadd(163476.000000,128160.000000,63450.000000,209.592384)}
{pt3dadd(163380.000000,128244.000000,63625.000000,209.592384)}
{pt3dadd(163272.000000,128340.000000,63800.000000,207.539976)}
{pt3dadd(163248.000000,128448.000000,64000.000000,207.539976)}
{pt3dadd(163128.000000,128568.000000,64125.000000,188.921396)}
{pt3dadd(163080.000000,128640.000000,64325.000000,190.609916)}
{pt3dadd(163068.000000,128712.000000,64500.000000,178.140124)}
{pt3dadd(163020.000000,128748.000000,64675.000000,166.264130)}
{pt3dadd(162960.000000,128868.000000,64850.000000,159.663010)}
{pt3dadd(162888.000000,128916.000000,65050.000000,153.675600)}
{pt3dadd(162780.000000,128988.000000,65225.000000,150.378966)}
{pt3dadd(162672.000000,129060.000000,65350.000000,148.920356)}
{pt3dadd(162636.000000,129060.000000,65500.000000,142.605348)}
{pt3dadd(162660.000000,129096.000000,65575.000000,134.831730)}
{pt3dadd(162612.000000,129192.000000,65725.000000,128.817438)}
{pt3dadd(162600.000000,129228.000000,65800.000000,117.387245)}
{pt3dadd(162504.000000,129420.000000,65925.000000,107.019723)}
{pt3dadd(162480.000000,129444.000000,66000.000000,103.907441)}
{pt3dadd(162348.000000,129612.000000,66000.000000,106.250299)}
{pt3dadd(162360.000000,129648.000000,66025.000000,112.264591)}
{pt3dadd(162660.000000,129552.000000,66075.000000,122.163248)}
{pt3dadd(162684.000000,129480.000000,66150.000000,135.520916)}
{pt3dadd(162684.000000,129516.000000,66250.000000,147.938352)}
{pt3dadd(162588.000000,129504.000000,66350.000000,172.632626)}
{pt3dadd(162564.000000,129576.000000,66475.000000,199.858066)}
{pt3dadd(162528.000000,129600.000000,66625.000000,214.482886)}
{pt3dadd(162480.000000,129636.000000,66775.000000,225.421142)}
{pt3dadd(162456.000000,129720.000000,66925.000000,223.889606)}
{pt3dadd(162396.000000,129780.000000,67050.000000,213.088804)}
{pt3dadd(162360.000000,129792.000000,67250.000000,199.128508)}
{pt3dadd(162348.000000,129864.000000,67400.000000,196.973480)}
{pt3dadd(162348.000000,129936.000000,67550.000000,203.767202)}
{pt3dadd(162336.000000,129996.000000,67725.000000,220.654802)}
{pt3dadd(162312.000000,130044.000000,67900.000000,231.455604)}
{pt3dadd(162264.000000,130068.000000,68125.000000,248.166320)}
{pt3dadd(162180.000000,130080.000000,68225.000000,262.824628)}
{pt3dadd(162108.000000,130116.000000,68350.000000,260.448714)}
{pt3dadd(162060.000000,130128.000000,68500.000000,258.185934)}
{pt3dadd(161976.000000,130164.000000,68675.000000,251.392212)}
{pt3dadd(161880.000000,130212.000000,68825.000000,232.726824)}
{pt3dadd(161844.000000,130224.000000,68975.000000,210.426894)}
{pt3dadd(161772.000000,130284.000000,69100.000000,193.539294)}
{pt3dadd(161688.000000,130356.000000,69275.000000,178.914474)}
{pt3dadd(161568.000000,130428.000000,69425.000000,167.976218)}
{pt3dadd(161508.000000,130512.000000,69575.000000,158.054896)}
{pt3dadd(161400.000000,130584.000000,69750.000000,153.226726)}
{pt3dadd(161328.000000,130668.000000,69875.000000,161.689438)}
{pt3dadd(161256.000000,130764.000000,70000.000000,172.106822)}
{pt3dadd(161184.000000,130884.000000,70125.000000,179.037998)}
{pt3dadd(161100.000000,130980.000000,70350.000000,190.913992)}
{pt3dadd(161028.000000,131052.000000,70525.000000,201.331376)}
{pt3dadd(160944.000000,131136.000000,70700.000000,201.331376)}
{pt3dadd(160800.000000,131160.000000,70875.000000,199.376704)}
{pt3dadd(160704.000000,131244.000000,71050.000000,192.445528)}
{pt3dadd(160644.000000,131268.000000,71200.000000,182.028144)}
{pt3dadd(160608.000000,131292.000000,71300.000000,182.028144)}
{pt3dadd(160476.000000,131328.000000,71450.000000,188.190252)}
{pt3dadd(160440.000000,131364.000000,71575.000000,190.144924)}
{pt3dadd(160320.000000,131448.000000,71725.000000,203.238208)}
{pt3dadd(160212.000000,131508.000000,71850.000000,224.996438)}
{pt3dadd(160116.000000,131556.000000,71975.000000,233.842568)}
{pt3dadd(160044.000000,131532.000000,72100.000000,231.687540)}
{pt3dadd(160032.000000,131568.000000,72375.000000,227.871276)}
{pt3dadd(159996.000000,131688.000000,72500.000000,214.777992)}
{pt3dadd(160020.000000,131664.000000,72650.000000,193.019762)}
{pt3dadd(159960.000000,131652.000000,72775.000000,172.297638)}
{pt3dadd(159924.000000,131712.000000,72900.000000,162.967496)}
{pt3dadd(159888.000000,131760.000000,72950.000000,164.829088)}
{pt3dadd(159876.000000,131808.000000,73025.000000,171.760264)}
{pt3dadd(159888.000000,131808.000000,73150.000000,178.361384)}
{pt3dadd(159780.000000,131856.000000,73250.000000,192.289786)}
{pt3dadd(159768.000000,131856.000000,73375.000000,206.037736)}
{pt3dadd(159768.000000,131916.000000,73500.000000,207.992408)}
{pt3dadd(159684.000000,131928.000000,73675.000000,207.992408)}
{pt3dadd(159624.000000,131976.000000,73850.000000,206.219458)}
{pt3dadd(159468.000000,132060.000000,74075.000000,206.219458)}
{pt3dadd(159384.000000,132060.000000,74275.000000,197.794570)}
{pt3dadd(159204.000000,132048.000000,74450.000000,187.377186)}
{pt3dadd(159132.000000,132108.000000,74600.000000,189.331858)}
{pt3dadd(159036.000000,132168.000000,74750.000000,189.331858)}
{pt3dadd(158952.000000,132204.000000,74900.000000,189.331858)}
{pt3dadd(158952.000000,132276.000000,75075.000000,189.331858)}
{pt3dadd(158844.000000,132300.000000,75225.000000,206.219458)}
{pt3dadd(158688.000000,132120.000000,75325.000000,217.560304)}
{pt3dadd(158556.000000,132180.000000,75450.000000,223.149518)}
{pt3dadd(158448.000000,132204.000000,75575.000000,221.097110)}
{pt3dadd(158460.000000,132264.000000,75725.000000,229.521998)}
{pt3dadd(158496.000000,132444.000000,75925.000000,219.235518)}
{pt3dadd(158424.000000,132564.000000,76100.000000,207.894672)}
{pt3dadd(158328.000000,132624.000000,76200.000000,209.947080)}
{pt3dadd(158316.000000,132744.000000,76350.000000,209.947080)}
{pt3dadd(158208.000000,132792.000000,76500.000000,212.322994)}
{pt3dadd(158076.000000,132828.000000,76625.000000,224.985388)}
{pt3dadd(158112.000000,132828.000000,76800.000000,236.326234)}
{pt3dadd(157920.000000,132888.000000,76900.000000,240.744042)}
{pt3dadd(157860.000000,132924.000000,77125.000000,257.454758)}
{pt3dadd(157788.000000,133104.000000,77250.000000,259.949474)}
{pt3dadd(157728.000000,133236.000000,77400.000000,259.949474)}
{pt3dadd(157644.000000,133296.000000,77575.000000,257.454758)}
{pt3dadd(157608.000000,133356.000000,77775.000000,247.168278)}
{pt3dadd(157476.000000,133476.000000,77875.000000,232.509970)}
{pt3dadd(157404.000000,133560.000000,78050.000000,207.903980)}
{pt3dadd(157308.000000,133668.000000,78200.000000,193.468636)}
{pt3dadd(157176.000000,133776.000000,78350.000000,177.344772)}
{pt3dadd(157068.000000,133836.000000,78475.000000,170.743652)}
{pt3dadd(157056.000000,133872.000000,78625.000000,158.273860)}
{pt3dadd(156948.000000,133896.000000,78775.000000,162.653156)}
{pt3dadd(156876.000000,133932.000000,78925.000000,159.356522)}
{pt3dadd(156816.000000,133980.000000,79050.000000,164.679584)}
{pt3dadd(156684.000000,134004.000000,79175.000000,158.048824)}
{pt3dadd(156576.000000,134016.000000,79325.000000,158.048824)}
{pt3dadd(156516.000000,134040.000000,79475.000000,156.517288)}
{pt3dadd(156384.000000,134076.000000,79625.000000,149.554992)}
{pt3dadd(156324.000000,134148.000000,79775.000000,142.623816)}
{pt3dadd(156204.000000,134184.000000,79950.000000,147.795966)}
{pt3dadd(156048.000000,134268.000000,80075.000000,144.948206)}
{pt3dadd(156000.000000,134304.000000,80225.000000,143.489596)}
{pt3dadd(155964.000000,134328.000000,80350.000000,147.461746)}
{pt3dadd(155880.000000,134352.000000,80500.000000,139.299450)}
{pt3dadd(155760.000000,134400.000000,80675.000000,160.021574)}
{pt3dadd(155652.000000,134424.000000,80850.000000,182.132848)}
{pt3dadd(155520.000000,134436.000000,81025.000000,207.969138)}
{pt3dadd(155472.000000,134472.000000,81200.000000,231.185978)}
{pt3dadd(155508.000000,134484.000000,81475.000000,264.944838)}
{pt3dadd(155436.000000,134496.000000,81625.000000,267.439554)}
{pt3dadd(155328.000000,134496.000000,81800.000000,254.777160)}
{pt3dadd(155232.000000,134520.000000,81975.000000,235.227650)}
{pt3dadd(155184.000000,134532.000000,82175.000000,225.939212)}
{pt3dadd(155148.000000,134568.000000,82350.000000,192.985603)}
{pt3dadd(155100.000000,134604.000000,82525.000000,215.502760)}

{create adhoc6}
{access adhoc6}
{connect adhoc6(1), adhoc5(0)}
{nseg = 1}
{strdef color color = "White"}
{pt3dclear()}
{pt3dadd(155100.000000,134604.000000,82525.000000,215.502760)}
{pt3dadd(154968.000000,134604.000000,82725.000000,166.759503)}
{pt3dadd(154824.000000,134604.000000,82925.000000,144.060330)}
{pt3dadd(154800.000000,134472.000000,83050.000000,122.728486)}
{pt3dadd(154788.000000,134376.000000,83150.000000,113.301196)}
{pt3dadd(154728.000000,134220.000000,83250.000000,106.250299)}
{pt3dadd(154608.000000,134076.000000,83400.000000,107.190531)}
{pt3dadd(154548.000000,133980.000000,83375.000000,99.046883)}
{pt3dadd(154512.000000,133860.000000,83500.000000,95.187344)}
{pt3dadd(154500.000000,133752.000000,83625.000000,91.686629)}
{pt3dadd(154464.000000,133584.000000,83700.000000,88.010878)}
{pt3dadd(154380.000000,133464.000000,83800.000000,93.466018)}
{pt3dadd(154356.000000,133308.000000,83825.000000,102.869666)}
{pt3dadd(154344.000000,133140.000000,83900.000000,112.743497)}
{pt3dadd(154308.000000,132996.000000,83975.000000,127.130112)}
{pt3dadd(154248.000000,132888.000000,84075.000000,134.073760)}
{pt3dadd(153996.000000,132744.000000,84100.000000,131.730902)}
{pt3dadd(153852.000000,132612.000000,84150.000000,135.901662)}
{pt3dadd(153744.000000,132492.000000,84150.000000,143.577592)}
{pt3dadd(153492.000000,132372.000000,84250.000000,152.040304)}
{pt3dadd(153204.000000,132240.000000,84250.000000,161.810714)}
{pt3dadd(153012.000000,132108.000000,84275.000000,166.736572)}
{pt3dadd(152940.000000,131940.000000,84200.000000,158.962954)}
{pt3dadd(152604.000000,131844.000000,84175.000000,146.361166)}
{pt3dadd(152424.000000,131736.000000,84175.000000,122.495473)}
{pt3dadd(152388.000000,131604.000000,84100.000000,114.285710)}

{create adhoc7}
{access adhoc7}
{connect adhoc7(1), adhoc5(0)}
{nseg = 1}
{strdef color color = "White"}
{pt3dclear()}
{pt3dadd(155100.000000,134604.000000,82525.000000,215.502760)}
{pt3dadd(155040.000000,134784.000000,82725.000000,190.171403)}
{pt3dadd(155040.000000,134916.000000,82975.000000,194.244458)}
{pt3dadd(154968.000000,135048.000000,83275.000000,192.192050)}
{pt3dadd(154824.000000,135144.000000,83400.000000,198.060722)}
{pt3dadd(154812.000000,135264.000000,83550.000000,205.338456)}
{pt3dadd(154800.000000,135384.000000,83825.000000,209.345536)}
{pt3dadd(154824.000000,135480.000000,84000.000000,215.815752)}
{pt3dadd(154836.000000,135576.000000,84175.000000,217.868160)}
{pt3dadd(154764.000000,135672.000000,84325.000000,222.285968)}
{pt3dadd(154824.000000,135804.000000,84500.000000,216.696754)}
{pt3dadd(154788.000000,135936.000000,84675.000000,214.644346)}
{pt3dadd(154872.000000,136068.000000,85050.000000,210.226538)}
{pt3dadd(155052.000000,136188.000000,85550.000000,208.174130)}
{pt3dadd(155124.000000,136320.000000,85725.000000,201.703914)}
{pt3dadd(155232.000000,136488.000000,86025.000000,211.500564)}
{pt3dadd(155304.000000,136644.000000,86325.000000,217.970780)}
{pt3dadd(155616.000000,136800.000000,86675.000000,232.629088)}
{pt3dadd(155664.000000,136944.000000,86825.000000,241.475218)}
{pt3dadd(155736.000000,137016.000000,86850.000000,239.520546)}
{pt3dadd(155844.000000,137148.000000,87050.000000,220.724966)}
{pt3dadd(156012.000000,137304.000000,87100.000000,196.063748)}
{pt3dadd(156204.000000,137448.000000,87175.000000,161.162030)}
{pt3dadd(156396.000000,137592.000000,87075.000000,131.012616)}
{pt3dadd(156432.000000,137712.000000,87075.000000,113.687852)}
{pt3dadd(156516.000000,137832.000000,87100.000000,110.084994)}
{pt3dadd(156600.000000,137940.000000,87075.000000,113.687852)}
{pt3dadd(156540.000000,138060.000000,87100.000000,116.030710)}
{pt3dadd(156780.000000,138180.000000,87175.000000,116.030710)}
{pt3dadd(156780.000000,138312.000000,87225.000000,118.262002)}
{pt3dadd(156864.000000,138456.000000,87325.000000,126.035620)}
{pt3dadd(156972.000000,138576.000000,87450.000000,136.807500)}
{pt3dadd(156984.000000,138684.000000,87550.000000,145.377910)}
{pt3dadd(157008.000000,138792.000000,87700.000000,154.805200)}
{pt3dadd(157068.000000,138912.000000,87825.000000,157.265200)}
{pt3dadd(157128.000000,139020.000000,87950.000000,149.491582)}
{pt3dadd(157152.000000,139116.000000,87950.000000,138.719702)}
{pt3dadd(157176.000000,139212.000000,87975.000000,130.149292)}
{pt3dadd(157188.000000,139344.000000,87925.000000,127.437142)}
{pt3dadd(157188.000000,139476.000000,87975.000000,131.607902)}
{pt3dadd(157284.000000,139608.000000,88025.000000,136.533760)}
{pt3dadd(157308.000000,139740.000000,88100.000000,136.533760)}
{pt3dadd(157308.000000,139836.000000,88075.000000,133.102468)}
{pt3dadd(157320.000000,139956.000000,88150.000000,133.102468)}
{pt3dadd(157272.000000,140064.000000,88150.000000,128.931708)}
{pt3dadd(157284.000000,140196.000000,88175.000000,127.608708)}
{pt3dadd(157272.000000,140328.000000,88175.000000,130.320858)}
{pt3dadd(157260.000000,140460.000000,88175.000000,140.714446)}
{pt3dadd(157308.000000,140604.000000,88200.000000,148.024856)}
{pt3dadd(157272.000000,140736.000000,88200.000000,152.195616)}
{pt3dadd(157308.000000,140880.000000,88250.000000,159.506026)}
{pt3dadd(157332.000000,141024.000000,88275.000000,164.104286)}
{pt3dadd(157296.000000,141156.000000,88300.000000,167.400920)}
{pt3dadd(157380.000000,141288.000000,88350.000000,164.261270)}
{pt3dadd(157368.000000,141420.000000,88325.000000,162.802660)}
{pt3dadd(157452.000000,141600.000000,88400.000000,162.802660)}
{pt3dadd(157464.000000,141768.000000,88475.000000,159.663010)}
{pt3dadd(157428.000000,141948.000000,88450.000000,153.376230)}
{pt3dadd(157452.000000,142104.000000,88550.000000,154.907766)}
{pt3dadd(157416.000000,142284.000000,88625.000000,164.829088)}
{pt3dadd(157368.000000,142380.000000,88675.000000,174.159230)}
{pt3dadd(157332.000000,142500.000000,88725.000000,184.576614)}
{pt3dadd(157296.000000,142644.000000,88750.000000,194.497936)}
{pt3dadd(157212.000000,142812.000000,88750.000000,197.794570)}
{pt3dadd(157104.000000,142956.000000,88725.000000,199.749242)}
{pt3dadd(157092.000000,143136.000000,88725.000000,204.167050)}
{pt3dadd(157092.000000,143316.000000,88750.000000,210.637266)}
{pt3dadd(157176.000000,143532.000000,88725.000000,210.637266)}
{pt3dadd(157128.000000,143808.000000,88700.000000,216.226480)}
{pt3dadd(157140.000000,144120.000000,88700.000000,230.186776)}
{pt3dadd(157068.000000,144396.000000,88675.000000,221.761888)}
{pt3dadd(156984.000000,144624.000000,88700.000000,204.874288)}
{pt3dadd(156876.000000,144840.000000,88675.000000,204.874288)}
{pt3dadd(156924.000000,145068.000000,88675.000000,206.926696)}
{pt3dadd(156876.000000,145296.000000,88700.000000,192.966400)}
{pt3dadd(156816.000000,145500.000000,88650.000000,187.643338)}
{pt3dadd(156744.000000,145716.000000,88625.000000,192.471508)}
{pt3dadd(156720.000000,145980.000000,88725.000000,185.540332)}
{pt3dadd(156696.000000,146136.000000,88800.000000,181.533252)}
{pt3dadd(156672.000000,146376.000000,88850.000000,177.716988)}
{pt3dadd(156660.000000,146568.000000,88925.000000,184.994722)}
{pt3dadd(156600.000000,146808.000000,88975.000000,190.583936)}
{pt3dadd(156552.000000,147024.000000,88925.000000,195.653520)}
{pt3dadd(156612.000000,147240.000000,88900.000000,192.018978)}
{pt3dadd(156636.000000,147468.000000,88875.000000,200.042678)}
{pt3dadd(156600.000000,147636.000000,88875.000000,194.453464)}
{pt3dadd(156540.000000,147852.000000,88825.000000,187.175730)}
{pt3dadd(156456.000000,148020.000000,88750.000000,193.044402)}
{pt3dadd(156444.000000,148164.000000,88700.000000,196.678944)}
{pt3dadd(156408.000000,148320.000000,88650.000000,192.471508)}
{pt3dadd(156432.000000,148524.000000,88600.000000,202.268158)}
{pt3dadd(156480.000000,148704.000000,88625.000000,216.016108)}
{pt3dadd(156540.000000,148848.000000,88500.000000,225.304546)}
{pt3dadd(156612.000000,149040.000000,88450.000000,241.219514)}
{pt3dadd(156660.000000,149172.000000,88400.000000,267.034474)}
{pt3dadd(156696.000000,149304.000000,88400.000000,269.297254)}
{pt3dadd(156744.000000,149448.000000,88325.000000,274.167884)}
{pt3dadd(156840.000000,149592.000000,88250.000000,271.673168)}
{pt3dadd(156852.000000,149760.000000,88250.000000,274.423588)}
{pt3dadd(156900.000000,149916.000000,88225.000000,244.792364)}
{pt3dadd(156984.000000,150048.000000,88175.000000,229.436300)}
{pt3dadd(157008.000000,150240.000000,88125.000000,209.209606)}
{pt3dadd(157104.000000,150360.000000,88000.000000,196.547212)}
{pt3dadd(157080.000000,150480.000000,88050.000000,177.881824)}
{pt3dadd(157164.000000,150600.000000,88050.000000,169.822094)}
{pt3dadd(157032.000000,150732.000000,88050.000000,165.442798)}
{pt3dadd(157104.000000,150888.000000,88050.000000,156.137644)}
{pt3dadd(157116.000000,151092.000000,88050.000000,140.674472)}
{pt3dadd(157116.000000,151344.000000,88125.000000,121.325860)}
{pt3dadd(157140.000000,151428.000000,88200.000000,111.898570)}
{pt3dadd(157212.000000,151536.000000,88175.000000,105.884278)}
{pt3dadd(157248.000000,151644.000000,88150.000000,104.795844)}
{pt3dadd(157176.000000,151740.000000,88175.000000,107.027136)}
{pt3dadd(157164.000000,151872.000000,88225.000000,113.742276)}
{pt3dadd(157116.000000,151992.000000,88250.000000,121.780416)}
{pt3dadd(157152.000000,152160.000000,88200.000000,130.642468)}
{pt3dadd(157140.000000,152280.000000,88125.000000,138.045910)}
{pt3dadd(157212.000000,152400.000000,88100.000000,144.676670)}
{pt3dadd(157260.000000,152532.000000,88100.000000,145.999670)}
{pt3dadd(157260.000000,152628.000000,87925.000000,150.378966)}
{pt3dadd(157260.000000,152748.000000,87875.000000,150.378966)}
{pt3dadd(157296.000000,152880.000000,87800.000000,146.406816)}
{pt3dadd(157344.000000,153000.000000,87850.000000,138.633198)}
{pt3dadd(157392.000000,153144.000000,87825.000000,130.595058)}
{pt3dadd(157416.000000,153252.000000,87750.000000,119.164865)}
{pt3dadd(157368.000000,153372.000000,87750.000000,109.266208)}
{pt3dadd(157392.000000,153492.000000,87700.000000,109.266208)}
{pt3dadd(157392.000000,153624.000000,87675.000000,105.213694)}
{pt3dadd(157452.000000,153888.000000,87675.000000,106.200937)}
{pt3dadd(157500.000000,154032.000000,87750.000000,105.213694)}
{pt3dadd(157536.000000,154164.000000,87675.000000,104.226451)}
{pt3dadd(157524.000000,154392.000000,87675.000000,108.198601)}
{pt3dadd(157440.000000,154620.000000,87675.000000,128.487445)}
{pt3dadd(157212.000000,154956.000000,87675.000000,146.848814)}
{pt3dadd(157056.000000,155172.000000,87675.000000,156.276104)}
{pt3dadd(156900.000000,155400.000000,87675.000000,162.991244)}
{pt3dadd(156780.000000,155700.000000,87675.000000,171.050974)}
{pt3dadd(156780.000000,156036.000000,87675.000000,173.005646)}
{pt3dadd(156732.000000,156216.000000,87800.000000,171.144054)}
{pt3dadd(156660.000000,156372.000000,87900.000000,181.065376)}
{pt3dadd(156684.000000,156576.000000,87900.000000,190.064306)}
{pt3dadd(156708.000000,156780.000000,88000.000000,186.307137)}
{pt3dadd(156732.000000,156792.000000,88100.000000,177.294650)}

{create adhoc8}
{access adhoc8}
{connect adhoc8(1), adhoc7(0)}
{nseg = 1}
{strdef color color = "White"}
{pt3dclear()}
{pt3dadd(156732.000000,156792.000000,88100.000000,177.294650)}
{pt3dadd(156528.000000,156804.000000,88100.000000,132.006317)}
{pt3dadd(156408.000000,156444.000000,87925.000000,116.813046)}
{pt3dadd(156096.000000,156396.000000,87925.000000,99.263285)}
{pt3dadd(155916.000000,156408.000000,87975.000000,92.319637)}
{pt3dadd(155820.000000,156420.000000,87975.000000,89.631129)}
{pt3dadd(155736.000000,156456.000000,88100.000000,87.882853)}
{pt3dadd(155568.000000,156468.000000,88125.000000,85.281760)}
{pt3dadd(155520.000000,156432.000000,88150.000000,85.281760)}

{create adhoc9}
{access adhoc9}
{connect adhoc9(1), adhoc7(0)}
{nseg = 1}
{strdef color color = "White"}
{pt3dclear()}
{pt3dadd(156732.000000,156792.000000,88100.000000,177.294650)}
{pt3dadd(156696.000000,156912.000000,88100.000000,166.305870)}
{pt3dadd(156708.000000,157128.000000,88100.000000,149.100664)}
{pt3dadd(156564.000000,157320.000000,88125.000000,147.412144)}
{pt3dadd(156636.000000,157512.000000,88225.000000,143.032848)}
{pt3dadd(156612.000000,157692.000000,88275.000000,140.042702)}
{pt3dadd(156564.000000,157860.000000,88325.000000,147.816320)}
{pt3dadd(156528.000000,158028.000000,88425.000000,150.528470)}
{pt3dadd(156480.000000,158196.000000,88525.000000,138.526768)}
{pt3dadd(156504.000000,158376.000000,88550.000000,132.512476)}
{pt3dadd(156444.000000,158520.000000,88550.000000,129.800326)}
{pt3dadd(156420.000000,158688.000000,88525.000000,131.331862)}
{pt3dadd(156396.000000,158832.000000,88500.000000,135.930122)}
{pt3dadd(156396.000000,158964.000000,88500.000000,146.323710)}
{pt3dadd(156408.000000,159132.000000,88500.000000,153.727152)}
{pt3dadd(156420.000000,159348.000000,88500.000000,151.267152)}
{pt3dadd(156432.000000,159564.000000,88500.000000,148.277006)}
{pt3dadd(156444.000000,159876.000000,88400.000000,143.678746)}
{pt3dadd(156456.000000,160056.000000,88400.000000,143.678746)}
{pt3dadd(156516.000000,160176.000000,88450.000000,145.137356)}
{pt3dadd(156528.000000,160500.000000,88450.000000,158.369236)}
{pt3dadd(156516.000000,160716.000000,88550.000000,156.980086)}
{pt3dadd(156528.000000,160968.000000,88550.000000,154.267936)}
{pt3dadd(156552.000000,161280.000000,88550.000000,148.565640)}
{pt3dadd(156540.000000,161388.000000,88600.000000,137.679740)}
{pt3dadd(156540.000000,161496.000000,88550.000000,121.179963)}
{pt3dadd(156540.000000,161628.000000,88625.000000,114.129066)}
{pt3dadd(156456.000000,161772.000000,88600.000000,107.413926)}
{pt3dadd(156420.000000,161904.000000,88550.000000,100.698786)}
{pt3dadd(156396.000000,162060.000000,88625.000000,100.698786)}
{pt3dadd(156360.000000,162204.000000,88700.000000,99.711543)}
{pt3dadd(156396.000000,162372.000000,88750.000000,98.724300)}
{pt3dadd(156468.000000,162540.000000,88775.000000,97.784068)}
{pt3dadd(156456.000000,162684.000000,88825.000000,97.784068)}
{pt3dadd(156336.000000,162852.000000,88800.000000,97.784068)}
{pt3dadd(156300.000000,162984.000000,88750.000000,107.211358)}
{pt3dadd(156204.000000,163104.000000,88725.000000,126.559970)}
{pt3dadd(156144.000000,163248.000000,88625.000000,148.803486)}
{pt3dadd(156108.000000,163368.000000,88600.000000,172.159178)}
{pt3dadd(156036.000000,163500.000000,88600.000000,195.514870)}
{pt3dadd(156072.000000,163656.000000,88575.000000,213.861080)}
{pt3dadd(155964.000000,163836.000000,88550.000000,217.868160)}
{pt3dadd(156072.000000,164016.000000,88550.000000,215.913488)}
{pt3dadd(156000.000000,164292.000000,88500.000000,220.331296)}
{pt3dadd(155916.000000,164508.000000,88475.000000,220.331296)}
{pt3dadd(155892.000000,164640.000000,88500.000000,215.913488)}
{pt3dadd(155916.000000,164784.000000,88475.000000,218.068516)}
{pt3dadd(155904.000000,164916.000000,88450.000000,220.023188)}
{pt3dadd(155928.000000,165060.000000,88500.000000,201.676978)}
{pt3dadd(155928.000000,165252.000000,88525.000000,182.576426)}
{pt3dadd(155916.000000,165432.000000,88425.000000,162.333016)}
{pt3dadd(155976.000000,165576.000000,88375.000000,143.537436)}
{pt3dadd(155976.000000,165732.000000,88400.000000,128.949292)}
{pt3dadd(155928.000000,165852.000000,88350.000000,128.949292)}
{pt3dadd(155916.000000,165936.000000,88250.000000,137.111588)}
{pt3dadd(155904.000000,166044.000000,88250.000000,137.111588)}
{pt3dadd(155868.000000,166164.000000,88225.000000,134.651588)}
{pt3dadd(155808.000000,166308.000000,88125.000000,125.247940)}
{pt3dadd(155772.000000,166356.000000,88075.000000,113.132142)}
{pt3dadd(155724.000000,166416.000000,88100.000000,98.879015)}
{pt3dadd(155700.000000,166488.000000,88100.000000,93.078225)}
{pt3dadd(155676.000000,166596.000000,88075.000000,86.987394)}
{pt3dadd(155664.000000,166680.000000,88050.000000,88.735670)}
{pt3dadd(155628.000000,166788.000000,88000.000000,88.735670)}
{pt3dadd(155592.000000,166884.000000,88100.000000,89.631129)}
{pt3dadd(155520.000000,167016.000000,88100.000000,91.379405)}
{pt3dadd(155472.000000,167160.000000,88100.000000,90.526588)}
{pt3dadd(155496.000000,167268.000000,88100.000000,90.526588)}
{pt3dadd(155472.000000,167460.000000,88100.000000,90.526588)}
{pt3dadd(155508.000000,167580.000000,88175.000000,88.778312)}
{pt3dadd(155556.000000,167712.000000,88175.000000,88.778312)}
{pt3dadd(155592.000000,167940.000000,88175.000000,89.631129)}
{pt3dadd(155592.000000,168036.000000,88175.000000,93.683643)}
{pt3dadd(155580.000000,168108.000000,88250.000000,104.410291)}
{pt3dadd(155556.000000,168336.000000,88325.000000,113.813939)}
{pt3dadd(155616.000000,168540.000000,88400.000000,112.065663)}
{pt3dadd(155616.000000,168720.000000,88475.000000,113.901354)}
{pt3dadd(155604.000000,168984.000000,88600.000000,108.953381)}
{pt3dadd(155592.000000,169260.000000,88600.000000,99.975009)}
{pt3dadd(155544.000000,169392.000000,88500.000000,92.319637)}
{pt3dadd(155484.000000,169500.000000,88425.000000,93.172454)}
{pt3dadd(155484.000000,169680.000000,88425.000000,93.172454)}
{pt3dadd(155460.000000,169848.000000,88425.000000,93.172454)}
{pt3dadd(155436.000000,169956.000000,88425.000000,93.172454)}
{pt3dadd(155388.000000,170112.000000,88425.000000,94.112686)}
{pt3dadd(155352.000000,170256.000000,88425.000000,94.112686)}
{pt3dadd(155400.000000,170292.000000,88375.000000,91.424178)}
{pt3dadd(155412.000000,170340.000000,88325.000000,92.319637)}
{pt3dadd(155364.000000,170364.000000,88225.000000,110.746889)}
{pt3dadd(155304.000000,170472.000000,88125.000000,132.050173)}
{pt3dadd(155136.000000,170712.000000,88000.000000,134.873107)}
{pt3dadd(155112.000000,170796.000000,87950.000000,137.561615)}
{pt3dadd(155208.000000,170868.000000,87975.000000,136.666156)}
{pt3dadd(155304.000000,170952.000000,87975.000000,118.238904)}
{pt3dadd(155304.000000,171168.000000,88050.000000,97.922863)}
{pt3dadd(155304.000000,171384.000000,88050.000000,95.995388)}
{pt3dadd(155292.000000,171492.000000,88100.000000,95.995388)}
{pt3dadd(155220.000000,171612.000000,88075.000000,97.831079)}
{pt3dadd(155172.000000,171756.000000,88125.000000,98.771311)}
{pt3dadd(155088.000000,171912.000000,88175.000000,96.843836)}
{pt3dadd(155028.000000,172140.000000,88175.000000,95.095560)}
{pt3dadd(154920.000000,172272.000000,88175.000000,92.407052)}
{pt3dadd(154920.000000,172296.000000,88125.000000,92.407052)}
{pt3dadd(154884.000000,172392.000000,88050.000000,92.407052)}
{pt3dadd(154812.000000,172476.000000,88000.000000,92.407052)}
{pt3dadd(154812.000000,172548.000000,87925.000000,93.259869)}
{pt3dadd(154824.000000,172584.000000,87825.000000,97.972225)}
{pt3dadd(154812.000000,172656.000000,87725.000000,97.031993)}
{pt3dadd(154764.000000,172752.000000,87625.000000,96.091761)}
{pt3dadd(154800.000000,172848.000000,87500.000000,95.196302)}
{pt3dadd(154740.000000,173052.000000,87425.000000,95.196302)}
{pt3dadd(154692.000000,173268.000000,87400.000000,94.159697)}
{pt3dadd(154572.000000,173472.000000,87350.000000,93.264238)}
{pt3dadd(154488.000000,173640.000000,87275.000000,90.703755)}
{pt3dadd(154356.000000,173844.000000,87250.000000,89.038731)}
{pt3dadd(154260.000000,173988.000000,87175.000000,88.185914)}
{pt3dadd(154164.000000,174048.000000,87125.000000,84.510163)}
{pt3dadd(154068.000000,174204.000000,87025.000000,83.657346)}
{pt3dadd(153948.000000,174276.000000,86925.000000,85.322370)}
{pt3dadd(153852.000000,174372.000000,86825.000000,88.823085)}
{pt3dadd(153792.000000,174540.000000,86725.000000,89.675902)}
{pt3dadd(153708.000000,174564.000000,86650.000000,89.675902)}
{pt3dadd(153540.000000,174696.000000,86550.000000,90.528719)}
{pt3dadd(153348.000000,174840.000000,86375.000000,93.351653)}
{pt3dadd(153216.000000,174900.000000,86275.000000,90.663145)}
{pt3dadd(153132.000000,174972.000000,86175.000000,90.663145)}
{pt3dadd(153096.000000,175020.000000,86050.000000,89.850938)}
{pt3dadd(152928.000000,175176.000000,85950.000000,88.185914)}
{pt3dadd(152880.000000,175284.000000,85850.000000,84.510163)}
{pt3dadd(152796.000000,175380.000000,85800.000000,84.510163)}
{pt3dadd(152736.000000,175452.000000,85800.000000,82.845140)}
{pt3dadd(152712.000000,175404.000000,85775.000000,83.928082)}
{pt3dadd(152724.000000,175356.000000,85725.000000,81.220726)}

{create adhoc10}
{access adhoc10}
{connect adhoc10(1), adhoc4(0)}
{nseg = 1}
{strdef color color = "White"}
{pt3dclear()}
{pt3dadd(166836.000000,126888.000000,59575.000000,254.138600)}
{pt3dadd(166884.000000,127008.000000,59575.000000,233.150277)}
{pt3dadd(166908.000000,127212.000000,59575.000000,180.690698)}
{pt3dadd(166932.000000,127428.000000,59575.000000,156.471144)}
{pt3dadd(167004.000000,127668.000000,59575.000000,136.157138)}
{pt3dadd(167100.000000,127920.000000,59575.000000,117.864273)}
{pt3dadd(167232.000000,128220.000000,59575.000000,118.573669)}
{pt3dadd(167316.000000,128412.000000,59575.000000,122.263741)}
{pt3dadd(167352.000000,128520.000000,59475.000000,125.941735)}
{pt3dadd(167448.000000,128652.000000,59425.000000,127.806799)}
{pt3dadd(167664.000000,128820.000000,59425.000000,125.610946)}
{pt3dadd(167832.000000,129024.000000,59425.000000,129.073260)}
{pt3dadd(168000.000000,129252.000000,59400.000000,126.473260)}
{pt3dadd(168204.000000,129444.000000,59400.000000,116.187100)}
{pt3dadd(168408.000000,129648.000000,59425.000000,106.851596)}
{pt3dadd(168684.000000,129828.000000,59450.000000,106.062314)}
{pt3dadd(168936.000000,129948.000000,59450.000000,102.985135)}
{pt3dadd(169200.000000,130068.000000,59450.000000,107.295261)}
{pt3dadd(169260.000000,130068.000000,59600.000000,111.605387)}
{pt3dadd(169440.000000,130128.000000,59625.000000,119.747395)}
{pt3dadd(169716.000000,130188.000000,59675.000000,127.747395)}
{pt3dadd(169860.000000,130236.000000,59700.000000,124.762260)}
{pt3dadd(170004.000000,130284.000000,59775.000000,122.502134)}
{pt3dadd(170280.000000,130416.000000,59850.000000,119.192008)}
{pt3dadd(170496.000000,130548.000000,59850.000000,111.050000)}
{pt3dadd(170892.000000,130668.000000,59850.000000,103.050000)}
{pt3dadd(171264.000000,130764.000000,59850.000000,103.050000)}
{pt3dadd(171600.000000,130884.000000,59850.000000,113.000000)}
{pt3dadd(171876.000000,130932.000000,59850.000000,124.000000)}
{pt3dadd(172152.000000,131076.000000,59950.000000,124.000000)}
{pt3dadd(172356.000000,131088.000000,59950.000000,123.855423)}
{pt3dadd(172656.000000,131004.000000,59950.000000,123.710846)}
{pt3dadd(172836.000000,131016.000000,59900.000000,99.518077)}
{pt3dadd(173148.000000,131148.000000,59900.000000,99.277115)}

{create adhoc11}
{access adhoc11}
{connect adhoc11(1), adhoc3(0)}
{nseg = 1}
{strdef color color = "White"}
{pt3dclear()}
{pt3dadd(166692.000000,124212.000000,59550.000000,288.794300)}
{pt3dadd(166536.000000,123984.000000,59300.000000,355.502103)}
{pt3dadd(166512.000000,123924.000000,59075.000000,350.696978)}
{pt3dadd(166404.000000,123960.000000,58875.000000,356.617262)}
{pt3dadd(166332.000000,123936.000000,58650.000000,334.960260)}
{pt3dadd(166260.000000,123876.000000,58450.000000,334.960260)}
{pt3dadd(166164.000000,123744.000000,58250.000000,328.106792)}
{pt3dadd(166056.000000,123612.000000,58075.000000,331.290752)}
{pt3dadd(166008.000000,123528.000000,57850.000000,337.817864)}
{pt3dadd(165960.000000,123480.000000,57650.000000,341.001824)}
{pt3dadd(165840.000000,123468.000000,57400.000000,331.442368)}
{pt3dadd(165768.000000,123552.000000,57150.000000,322.338124)}
{pt3dadd(165696.000000,123432.000000,56975.000000,325.681276)}
{pt3dadd(165528.000000,123348.000000,56875.000000,319.154164)}
{pt3dadd(165564.000000,123264.000000,56675.000000,329.693460)}
{pt3dadd(165588.000000,123312.000000,56500.000000,342.763232)}
{pt3dadd(165672.000000,123288.000000,56325.000000,358.720944)}
{pt3dadd(165576.000000,123276.000000,56150.000000,362.231260)}
{pt3dadd(165648.000000,123204.000000,55975.000000,356.310976)}
{pt3dadd(165744.000000,123204.000000,55775.000000,342.587720)}
{pt3dadd(165828.000000,123228.000000,55525.000000,335.734252)}
{pt3dadd(165840.000000,123180.000000,55375.000000,305.118232)}
{pt3dadd(165864.000000,123168.000000,55175.000000,274.502212)}
{pt3dadd(166056.000000,123192.000000,54975.000000,261.998932)}
{pt3dadd(166128.000000,123180.000000,54775.000000,237.413260)}
{pt3dadd(166212.000000,123204.000000,54650.000000,211.598300)}
{pt3dadd(166284.000000,123336.000000,54425.000000,209.545892)}
{pt3dadd(166392.000000,123384.000000,54200.000000,207.493484)}
{pt3dadd(166428.000000,123396.000000,54050.000000,203.286048)}
{pt3dadd(166416.000000,123396.000000,53875.000000,207.293128)}
{pt3dadd(166452.000000,123360.000000,53675.000000,207.293128)}
{pt3dadd(166500.000000,123360.000000,53500.000000,218.633974)}
{pt3dadd(166512.000000,123312.000000,53350.000000,225.104190)}
{pt3dadd(166548.000000,123336.000000,53200.000000,227.156598)}
{pt3dadd(166632.000000,123360.000000,53050.000000,254.262302)}
{pt3dadd(166728.000000,123324.000000,52925.000000,268.222598)}
{pt3dadd(166752.000000,123408.000000,52700.000000,280.525413)}
{pt3dadd(166848.000000,123492.000000,52625.000000,275.042200)}

{create adhoc12}
{access adhoc12}
{connect adhoc12(1), adhoc11(0)}
{nseg = 1}
{strdef color color = "White"}
{pt3dclear()}
{pt3dadd(166848.000000,123492.000000,52625.000000,275.042200)}
{pt3dadd(166572.000000,123408.000000,52625.000000,216.378323)}
{pt3dadd(166368.000000,123288.000000,52625.000000,184.069994)}
{pt3dadd(166296.000000,123096.000000,52625.000000,151.918696)}
{pt3dadd(166332.000000,123012.000000,52600.000000,128.500237)}
{pt3dadd(166356.000000,122844.000000,52575.000000,114.285710)}

{create adhoc13}
{access adhoc13}
{connect adhoc13(1), adhoc11(0)}
{nseg = 1}
{strdef color color = "White"}
{pt3dclear()}
{pt3dadd(166848.000000,123492.000000,52625.000000,275.042200)}
{pt3dadd(167076.000000,123672.000000,52425.000000,289.493373)}
{pt3dadd(167136.000000,123780.000000,52350.000000,275.979288)}
{pt3dadd(167280.000000,123912.000000,52250.000000,270.865122)}
{pt3dadd(167268.000000,124068.000000,52100.000000,279.535826)}
{pt3dadd(167424.000000,124236.000000,52000.000000,286.062938)}
{pt3dadd(167520.000000,124488.000000,51875.000000,300.537052)}
{pt3dadd(167700.000000,124668.000000,51750.000000,320.849034)}
{pt3dadd(167928.000000,124872.000000,51600.000000,352.227276)}
{pt3dadd(168084.000000,125076.000000,51475.000000,382.631232)}
{pt3dadd(168168.000000,125340.000000,51275.000000,397.761122)}
{pt3dadd(168204.000000,125376.000000,51150.000000,434.486270)}
{pt3dadd(168276.000000,125412.000000,51050.000000,426.680730)}

{create adhoc14}
{access adhoc14}
{connect adhoc14(1), adhoc13(0)}
{nseg = 1}
{strdef color color = "White"}
{pt3dclear()}
{pt3dadd(168276.000000,125412.000000,51050.000000,426.680730)}
{pt3dadd(168552.000000,125292.000000,51050.000000,326.453820)}
{pt3dadd(168708.000000,125040.000000,51050.000000,239.409708)}
{pt3dadd(168744.000000,124968.000000,51050.000000,175.842270)}
{pt3dadd(168828.000000,124896.000000,50975.000000,112.274832)}
{pt3dadd(168924.000000,124860.000000,50950.000000,107.806935)}
{pt3dadd(169068.000000,124680.000000,50900.000000,105.783087)}
{pt3dadd(169200.000000,124584.000000,50850.000000,103.759239)}
{pt3dadd(169344.000000,124524.000000,50825.000000,103.759239)}
{pt3dadd(169488.000000,124428.000000,50800.000000,101.735391)}
{pt3dadd(169620.000000,124356.000000,50700.000000,99.807916)}
{pt3dadd(169776.000000,124308.000000,50650.000000,97.119408)}
{pt3dadd(169872.000000,124236.000000,50500.000000,97.119408)}
{pt3dadd(169992.000000,124152.000000,50475.000000,95.095560)}
{pt3dadd(170148.000000,124080.000000,50325.000000,94.155328)}
{pt3dadd(170292.000000,123972.000000,50300.000000,95.095560)}
{pt3dadd(170376.000000,123912.000000,50225.000000,95.095560)}
{pt3dadd(170508.000000,123924.000000,50100.000000,92.407052)}
{pt3dadd(170676.000000,123924.000000,50000.000000,88.906337)}
{pt3dadd(170820.000000,123876.000000,49975.000000,88.010878)}
{pt3dadd(171000.000000,123744.000000,49900.000000,86.175187)}
{pt3dadd(171168.000000,123636.000000,49850.000000,85.362980)}
{pt3dadd(171192.000000,123600.000000,49800.000000,86.770805)}
{pt3dadd(171216.000000,123540.000000,49750.000000,81.220726)}

{create adhoc15}
{access adhoc15}
{connect adhoc15(1), adhoc13(0)}
{nseg = 1}
{strdef color color = "White"}
{pt3dclear()}
{pt3dadd(168276.000000,125412.000000,51050.000000,426.680730)}
{pt3dadd(168276.000000,125760.000000,50925.000000,349.930183)}
{pt3dadd(168264.000000,125988.000000,50775.000000,334.284054)}
{pt3dadd(168252.000000,126216.000000,50625.000000,312.627052)}
{pt3dadd(168252.000000,126372.000000,50450.000000,302.386552)}
{pt3dadd(168372.000000,126636.000000,50300.000000,280.779028)}
{pt3dadd(168396.000000,126888.000000,50150.000000,260.200436)}
{pt3dadd(168528.000000,127224.000000,50025.000000,251.942626)}
{pt3dadd(168576.000000,127392.000000,49900.000000,235.781842)}
{pt3dadd(168708.000000,127644.000000,49750.000000,238.157756)}
{pt3dadd(168684.000000,127788.000000,49600.000000,240.420536)}
{pt3dadd(168756.000000,127896.000000,49450.000000,240.420536)}
{pt3dadd(168840.000000,128076.000000,49275.000000,229.079690)}
{pt3dadd(168804.000000,128196.000000,49100.000000,233.950320)}
{pt3dadd(168768.000000,128220.000000,48950.000000,233.950320)}
{pt3dadd(168744.000000,128256.000000,48800.000000,241.440400)}
{pt3dadd(168804.000000,128460.000000,48625.000000,245.858208)}
{pt3dadd(168876.000000,128580.000000,48425.000000,250.065644)}
{pt3dadd(168912.000000,128832.000000,48225.000000,238.724798)}
{pt3dadd(168948.000000,128892.000000,48050.000000,231.931076)}
{pt3dadd(168924.000000,128940.000000,47850.000000,215.673793)}
{pt3dadd(168912.000000,128892.000000,47650.000000,215.502760)}

{create adhoc16}
{access adhoc16}
{connect adhoc16(1), adhoc15(0)}
{nseg = 1}
{strdef color color = "White"}
{pt3dclear()}
{pt3dadd(168912.000000,128892.000000,47650.000000,215.502760)}
{pt3dadd(169176.000000,128904.000000,47650.000000,155.934253)}
{pt3dadd(169236.000000,128880.000000,47575.000000,140.529260)}
{pt3dadd(169356.000000,128832.000000,47425.000000,129.591004)}
{pt3dadd(169596.000000,128724.000000,47275.000000,133.761764)}
{pt3dadd(169764.000000,128592.000000,47125.000000,143.532174)}
{pt3dadd(169932.000000,128484.000000,47025.000000,157.222396)}
{pt3dadd(170088.000000,128436.000000,46850.000000,158.482396)}
{pt3dadd(170292.000000,128364.000000,46775.000000,161.779030)}
{pt3dadd(170352.000000,128388.000000,46625.000000,176.403850)}
{pt3dadd(170424.000000,128364.000000,46475.000000,181.726912)}
{pt3dadd(170568.000000,128364.000000,46350.000000,169.125124)}
{pt3dadd(170676.000000,128364.000000,46200.000000,166.665124)}
{pt3dadd(170928.000000,128292.000000,46100.000000,158.989194)}
{pt3dadd(171012.000000,128148.000000,45950.000000,137.733614)}
{pt3dadd(171156.000000,128088.000000,45800.000000,130.802438)}
{pt3dadd(171324.000000,128052.000000,45775.000000,129.714004)}
{pt3dadd(171552.000000,127920.000000,45625.000000,139.484414)}
{pt3dadd(171588.000000,127872.000000,45475.000000,147.160344)}
{pt3dadd(171732.000000,127728.000000,45325.000000,155.322640)}
{pt3dadd(171864.000000,127692.000000,45150.000000,156.930754)}
{pt3dadd(171936.000000,127668.000000,45025.000000,174.255518)}
{pt3dadd(172188.000000,127500.000000,44800.000000,183.585660)}
{pt3dadd(172524.000000,127404.000000,44700.000000,185.358610)}
{pt3dadd(173016.000000,127260.000000,44625.000000,192.289786)}
{pt3dadd(173244.000000,127176.000000,44550.000000,201.619928)}
{pt3dadd(173436.000000,127008.000000,44450.000000,203.574600)}
{pt3dadd(173640.000000,126936.000000,44475.000000,203.574600)}
{pt3dadd(173808.000000,126876.000000,44450.000000,213.861080)}
{pt3dadd(173988.000000,126744.000000,44450.000000,217.868160)}
{pt3dadd(174192.000000,126672.000000,44475.000000,220.023188)}
{pt3dadd(174360.000000,126600.000000,44425.000000,216.206924)}
{pt3dadd(174552.000000,126468.000000,44300.000000,208.565302)}
{pt3dadd(174612.000000,126324.000000,44150.000000,196.505872)}
{pt3dadd(174708.000000,126084.000000,44000.000000,192.498792)}
{pt3dadd(174684.000000,125892.000000,43825.000000,192.498792)}
{pt3dadd(174720.000000,125724.000000,43700.000000,184.439062)}
{pt3dadd(174648.000000,125532.000000,43500.000000,192.080684)}
{pt3dadd(174588.000000,125412.000000,43325.000000,192.080684)}
{pt3dadd(174468.000000,125184.000000,43150.000000,196.087764)}
{pt3dadd(174444.000000,125040.000000,43025.000000,191.880328)}
{pt3dadd(174276.000000,124896.000000,42825.000000,191.880328)}
{pt3dadd(174300.000000,124548.000000,42625.000000,182.550186)}
{pt3dadd(174372.000000,124368.000000,42525.000000,177.722016)}
{pt3dadd(174492.000000,124008.000000,42400.000000,166.783760)}
{pt3dadd(174624.000000,123864.000000,42300.000000,156.366376)}
{pt3dadd(174672.000000,123624.000000,42100.000000,157.824986)}
{pt3dadd(174516.000000,123504.000000,41900.000000,159.513506)}
{pt3dadd(174492.000000,123360.000000,41850.000000,162.653156)}
{pt3dadd(174468.000000,123252.000000,41700.000000,162.653156)}
{pt3dadd(174420.000000,123288.000000,41600.000000,162.653156)}
{pt3dadd(174336.000000,123276.000000,41450.000000,162.653156)}
{pt3dadd(174264.000000,123276.000000,41300.000000,159.356522)}
{pt3dadd(174264.000000,123252.000000,41150.000000,153.369112)}
{pt3dadd(174204.000000,123240.000000,40975.000000,145.206816)}
{pt3dadd(174276.000000,123228.000000,40825.000000,138.576056)}
{pt3dadd(174288.000000,123276.000000,40700.000000,129.714004)}
{pt3dadd(174288.000000,123312.000000,40525.000000,119.320416)}
{pt3dadd(174336.000000,123264.000000,40375.000000,126.996346)}
{pt3dadd(174420.000000,123180.000000,40200.000000,130.779346)}
{pt3dadd(174708.000000,123156.000000,40025.000000,134.562346)}
{pt3dadd(175092.000000,123168.000000,39850.000000,143.424398)}
{pt3dadd(175512.000000,123048.000000,39650.000000,150.827840)}
{pt3dadd(175608.000000,123000.000000,39575.000000,140.568910)}
{pt3dadd(175620.000000,122868.000000,39425.000000,136.785910)}
{pt3dadd(175692.000000,122784.000000,39350.000000,133.002910)}
{pt3dadd(175836.000000,122700.000000,39250.000000,125.229292)}
{pt3dadd(175956.000000,122532.000000,39125.000000,117.825850)}
{pt3dadd(176160.000000,122292.000000,39075.000000,113.357953)}
{pt3dadd(176280.000000,122112.000000,38925.000000,119.988713)}
{pt3dadd(176484.000000,121980.000000,38775.000000,118.845855)}
{pt3dadd(176604.000000,121920.000000,38600.000000,118.845855)}
{pt3dadd(176736.000000,121860.000000,38425.000000,121.077147)}
{pt3dadd(176856.000000,121752.000000,38200.000000,128.128044)}
{pt3dadd(176940.000000,121584.000000,38025.000000,132.956214)}
{pt3dadd(177024.000000,121452.000000,37800.000000,147.330952)}
{pt3dadd(177180.000000,121440.000000,37575.000000,155.104570)}
{pt3dadd(177396.000000,121392.000000,37375.000000,161.735330)}
{pt3dadd(177660.000000,121404.000000,37175.000000,164.583090)}
{pt3dadd(177984.000000,121296.000000,37025.000000,148.869020)}
{pt3dadd(178152.000000,121164.000000,36975.000000,130.441768)}
{pt3dadd(178416.000000,121152.000000,36850.000000,118.615636)}
{pt3dadd(178476.000000,121128.000000,36825.000000,107.729736)}
{pt3dadd(178596.000000,121128.000000,36775.000000,96.843836)}
{pt3dadd(178740.000000,121080.000000,36700.000000,98.867684)}
{pt3dadd(178848.000000,121080.000000,36675.000000,105.263056)}
{pt3dadd(179052.000000,121008.000000,36625.000000,106.203288)}
{pt3dadd(179172.000000,120948.000000,36575.000000,111.658428)}
{pt3dadd(179244.000000,120924.000000,36500.000000,121.085718)}
{pt3dadd(179304.000000,120900.000000,36450.000000,136.548890)}
{pt3dadd(179376.000000,120900.000000,36375.000000,152.397034)}
{pt3dadd(179508.000000,120924.000000,36325.000000,173.700318)}
{pt3dadd(179676.000000,120900.000000,36175.000000,182.270728)}
{pt3dadd(179760.000000,120888.000000,36100.000000,190.330458)}
{pt3dadd(179904.000000,120768.000000,36075.000000,186.750723)}
{pt3dadd(180096.000000,120696.000000,36025.000000,186.159400)}

{create adhoc17}
{access adhoc17}
{connect adhoc17(1), adhoc15(0)}
{nseg = 1}
{strdef color color = "White"}
{pt3dclear()}
{pt3dadd(168912.000000,128892.000000,47650.000000,215.502760)}
{pt3dadd(169008.000000,129000.000000,47775.000000,238.940953)}
{pt3dadd(168948.000000,129096.000000,47775.000000,219.689924)}
{pt3dadd(168852.000000,129144.000000,47650.000000,207.220132)}
{pt3dadd(168864.000000,129216.000000,47575.000000,182.842452)}
{pt3dadd(168852.000000,129300.000000,47400.000000,171.357282)}
{pt3dadd(168864.000000,129444.000000,47225.000000,167.895812)}
{pt3dadd(168756.000000,129588.000000,47075.000000,154.002340)}
{pt3dadd(168720.000000,129756.000000,46900.000000,146.228722)}
{pt3dadd(168684.000000,129948.000000,46800.000000,144.770112)}
{pt3dadd(168696.000000,130104.000000,46775.000000,146.458632)}
{pt3dadd(168672.000000,130188.000000,46725.000000,157.943802)}
{pt3dadd(168672.000000,130272.000000,46675.000000,180.262162)}
{pt3dadd(168648.000000,130416.000000,46550.000000,204.923380)}
{pt3dadd(168612.000000,130404.000000,46400.000000,221.006810)}
{pt3dadd(168420.000000,130500.000000,46250.000000,216.178640)}
{pt3dadd(168444.000000,130608.000000,46050.000000,193.780202)}
{pt3dadd(168420.000000,130812.000000,45825.000000,172.721842)}
{pt3dadd(168396.000000,130812.000000,45600.000000,151.663482)}
{pt3dadd(168444.000000,130872.000000,45425.000000,131.607902)}
{pt3dadd(168480.000000,130848.000000,45275.000000,131.607902)}
{pt3dadd(168384.000000,130824.000000,45050.000000,137.922910)}
{pt3dadd(168432.000000,130884.000000,44900.000000,142.093670)}
{pt3dadd(168336.000000,130896.000000,44725.000000,146.264430)}
{pt3dadd(168264.000000,130860.000000,44550.000000,160.157902)}
{pt3dadd(168228.000000,130956.000000,44375.000000,161.689438)}
{pt3dadd(168240.000000,130908.000000,44250.000000,173.565432)}
{pt3dadd(168288.000000,131160.000000,44100.000000,178.393602)}
{pt3dadd(168192.000000,131280.000000,43925.000000,183.221772)}
{pt3dadd(168180.000000,131172.000000,43775.000000,185.176444)}
{pt3dadd(168192.000000,131244.000000,43575.000000,188.473078)}
{pt3dadd(167904.000000,131280.000000,43375.000000,202.433374)}
{pt3dadd(167892.000000,131364.000000,43200.000000,230.653588)}
{pt3dadd(167988.000000,131424.000000,43025.000000,236.242802)}
{pt3dadd(168036.000000,131376.000000,42825.000000,227.356954)}
{pt3dadd(167964.000000,131400.000000,42650.000000,218.358024)}
{pt3dadd(167976.000000,131448.000000,42500.000000,197.119994)}
{pt3dadd(167928.000000,131460.000000,42325.000000,165.603146)}
{pt3dadd(167916.000000,131484.000000,42150.000000,165.603146)}
{pt3dadd(167976.000000,131484.000000,42000.000000,183.335124)}
{pt3dadd(168036.000000,131448.000000,41825.000000,220.554268)}
{pt3dadd(168132.000000,131400.000000,41625.000000,260.500430)}
{pt3dadd(168192.000000,131352.000000,41450.000000,286.096994)}
{pt3dadd(168420.000000,131304.000000,41350.000000,284.142322)}
{pt3dadd(168432.000000,131292.000000,41150.000000,275.296192)}
{pt3dadd(168576.000000,131352.000000,40950.000000,247.075978)}
{pt3dadd(168624.000000,131328.000000,40775.000000,218.614986)}
{pt3dadd(169080.000000,131424.000000,40650.000000,199.949598)}
{pt3dadd(169176.000000,131436.000000,40475.000000,198.088006)}
{pt3dadd(169272.000000,131412.000000,40275.000000,200.140414)}
{pt3dadd(169380.000000,131436.000000,40075.000000,196.843780)}
{pt3dadd(169632.000000,131424.000000,39900.000000,170.392828)}
{pt3dadd(169644.000000,131376.000000,39800.000000,148.355708)}
{pt3dadd(169884.000000,131328.000000,39725.000000,128.180180)}
{pt3dadd(170064.000000,131220.000000,39725.000000,103.884256)}
{pt3dadd(170160.000000,131124.000000,39600.000000,91.466820)}
{pt3dadd(170340.000000,131148.000000,39475.000000,90.571361)}
{pt3dadd(170712.000000,131184.000000,39450.000000,93.259869)}
{pt3dadd(171012.000000,131124.000000,39275.000000,95.948377)}
{pt3dadd(171084.000000,131220.000000,39150.000000,94.200101)}
{pt3dadd(171276.000000,131256.000000,39050.000000,92.364410)}
{pt3dadd(171516.000000,131340.000000,38925.000000,109.914171)}
{pt3dadd(171636.000000,131316.000000,38800.000000,137.687671)}
{pt3dadd(171852.000000,131220.000000,38600.000000,178.589611)}
{pt3dadd(172032.000000,131052.000000,38500.000000,239.373483)}
{pt3dadd(172248.000000,130980.000000,38400.000000,303.234000)}

{create adhoc18}
{access adhoc18}
{connect adhoc18(1), adhoc17(0)}
{nseg = 1}
{strdef color color = "White"}
{pt3dclear()}
{pt3dadd(172248.000000,130980.000000,38400.000000,303.234000)}
{pt3dadd(172344.000000,131100.000000,38275.000000,272.768733)}
{pt3dadd(172380.000000,131160.000000,38175.000000,238.962600)}
{pt3dadd(172392.000000,131340.000000,38150.000000,207.487950)}
{pt3dadd(172524.000000,131580.000000,38050.000000,185.188020)}
{pt3dadd(172668.000000,131844.000000,37950.000000,167.715440)}
{pt3dadd(172728.000000,132012.000000,37850.000000,141.965788)}
{pt3dadd(172980.000000,132072.000000,37700.000000,137.039930)}
{pt3dadd(173124.000000,132216.000000,37550.000000,124.924132)}
{pt3dadd(173076.000000,132228.000000,37450.000000,107.374371)}
{pt3dadd(173364.000000,132240.000000,37325.000000,96.647723)}
{pt3dadd(173364.000000,132228.000000,37150.000000,91.123160)}
{pt3dadd(173412.000000,132228.000000,37025.000000,85.322370)}
{pt3dadd(173436.000000,132180.000000,36850.000000,85.322370)}
{pt3dadd(173580.000000,132180.000000,36725.000000,86.217829)}
{pt3dadd(173772.000000,132180.000000,36525.000000,87.966105)}
{pt3dadd(173748.000000,132144.000000,36425.000000,89.631129)}
{pt3dadd(173796.000000,132180.000000,36300.000000,93.306880)}
{pt3dadd(173796.000000,132156.000000,36200.000000,102.710528)}
{pt3dadd(173880.000000,132180.000000,36050.000000,116.068196)}
{pt3dadd(174036.000000,132228.000000,35950.000000,123.723568)}
{pt3dadd(174192.000000,132204.000000,35900.000000,131.014399)}
{pt3dadd(174360.000000,132216.000000,35750.000000,132.051004)}
{pt3dadd(174576.000000,132288.000000,35575.000000,132.051004)}
{pt3dadd(174756.000000,132240.000000,35525.000000,127.671708)}
{pt3dadd(175008.000000,132168.000000,35425.000000,133.374004)}
{pt3dadd(175236.000000,132132.000000,35350.000000,135.957004)}
{pt3dadd(175440.000000,132072.000000,35300.000000,141.971296)}
{pt3dadd(175560.000000,132024.000000,35250.000000,138.368438)}
{pt3dadd(175704.000000,131964.000000,35175.000000,132.354146)}
{pt3dadd(175872.000000,131868.000000,35075.000000,123.048992)}
{pt3dadd(175968.000000,131724.000000,35000.000000,115.998095)}
{pt3dadd(176040.000000,131676.000000,34825.000000,107.959955)}
{pt3dadd(176136.000000,131580.000000,34825.000000,105.834916)}
{pt3dadd(176184.000000,131496.000000,34675.000000,101.122560)}
{pt3dadd(176280.000000,131424.000000,34625.000000,95.321770)}
{pt3dadd(176352.000000,131364.000000,34525.000000,90.833812)}
{pt3dadd(176412.000000,131280.000000,34450.000000,88.145304)}
{pt3dadd(176508.000000,131172.000000,34375.000000,84.469553)}
{pt3dadd(176604.000000,131088.000000,34350.000000,86.217829)}
{pt3dadd(176688.000000,131052.000000,34300.000000,87.966105)}
{pt3dadd(176724.000000,130968.000000,34250.000000,93.490668)}
{pt3dadd(176808.000000,130932.000000,34200.000000,96.179176)}
{pt3dadd(176916.000000,130872.000000,34150.000000,97.031993)}
{pt3dadd(177012.000000,130800.000000,34075.000000,99.037895)}
{pt3dadd(177084.000000,130692.000000,34000.000000,89.545845)}

{create adhoc19}
{access adhoc19}
{connect adhoc19(1), adhoc17(0)}
{nseg = 1}
{strdef color color = "White"}
{pt3dclear()}
{pt3dadd(172248.000000,130980.000000,38400.000000,303.234000)}
{pt3dadd(172188.000000,130944.000000,38525.000000,233.879093)}
{pt3dadd(172392.000000,130800.000000,38300.000000,189.644598)}
{pt3dadd(172560.000000,130596.000000,38300.000000,147.802426)}
{pt3dadd(172680.000000,130380.000000,38300.000000,120.028926)}
{pt3dadd(172740.000000,130128.000000,38225.000000,104.922982)}
{pt3dadd(172788.000000,130008.000000,38175.000000,98.207842)}
{pt3dadd(172848.000000,129864.000000,38100.000000,92.407052)}
{pt3dadd(172980.000000,129684.000000,38025.000000,90.658776)}
{pt3dadd(173088.000000,129528.000000,37950.000000,87.970268)}
{pt3dadd(173160.000000,129408.000000,37925.000000,87.970268)}
{pt3dadd(173196.000000,129324.000000,37875.000000,84.469553)}
{pt3dadd(173256.000000,129264.000000,37825.000000,84.469553)}
{pt3dadd(173436.000000,129156.000000,37700.000000,82.883815)}
{pt3dadd(173604.000000,129144.000000,37700.000000,83.736632)}
{pt3dadd(173748.000000,129156.000000,37625.000000,86.425140)}
{pt3dadd(173748.000000,129120.000000,37550.000000,88.985623)}
{pt3dadd(173892.000000,128964.000000,37500.000000,98.389271)}
{pt3dadd(174072.000000,128832.000000,37375.000000,116.689067)}
{pt3dadd(174264.000000,128808.000000,37300.000000,126.562898)}
{pt3dadd(174168.000000,128748.000000,37350.000000,126.562898)}
{pt3dadd(174408.000000,128700.000000,37350.000000,135.497117)}
{pt3dadd(174528.000000,128652.000000,37325.000000,98.724300)}

{create adhoc20}
{access adhoc20}
{connect adhoc20(1), adhoc2(0)}
{nseg = 1}
{strdef color color = "White"}
{pt3dclear()}
{pt3dadd(167148.000000,123348.000000,60900.000000,571.792970)}
{pt3dadd(167136.000000,123252.000000,61175.000000,677.689390)}
{pt3dadd(167124.000000,123192.000000,61425.000000,671.697568)}
{pt3dadd(167040.000000,123240.000000,61700.000000,638.611490)}
{pt3dadd(167208.000000,123168.000000,61875.000000,555.566294)}
{pt3dadd(167244.000000,123120.000000,62050.000000,480.241850)}
{pt3dadd(167340.000000,123072.000000,62200.000000,414.954834)}
{pt3dadd(167340.000000,123120.000000,62300.000000,352.553632)}
{pt3dadd(167364.000000,123060.000000,62475.000000,341.487372)}
{pt3dadd(167532.000000,123156.000000,62650.000000,344.997688)}
{pt3dadd(167640.000000,123144.000000,62825.000000,358.720944)}
{pt3dadd(167784.000000,123156.000000,63000.000000,345.651172)}
{pt3dadd(167868.000000,123096.000000,63200.000000,334.361018)}
{pt3dadd(167904.000000,123048.000000,63325.000000,331.017866)}
{pt3dadd(167940.000000,123084.000000,63500.000000,317.948094)}
{pt3dadd(168060.000000,123108.000000,63675.000000,314.262266)}
{pt3dadd(168108.000000,123036.000000,63825.000000,331.017866)}
{pt3dadd(168132.000000,123024.000000,64000.000000,356.031276)}
{pt3dadd(168156.000000,122988.000000,64150.000000,370.440688)}
{pt3dadd(168312.000000,123012.000000,64350.000000,418.706840)}
{pt3dadd(168324.000000,122928.000000,64575.000000,422.392668)}
{pt3dadd(168324.000000,122916.000000,64750.000000,426.262784)}
{pt3dadd(168396.000000,122988.000000,64950.000000,426.262784)}
{pt3dadd(168396.000000,122976.000000,65100.000000,426.262784)}
{pt3dadd(168360.000000,122856.000000,65300.000000,387.556088)}
{pt3dadd(168360.000000,122832.000000,65450.000000,404.236788)}
{pt3dadd(168528.000000,122940.000000,65650.000000,412.567226)}
{pt3dadd(168624.000000,122988.000000,65825.000000,408.881398)}
{pt3dadd(168696.000000,122940.000000,66000.000000,417.211836)}
{pt3dadd(168936.000000,122676.000000,66175.000000,441.088680)}
{pt3dadd(169104.000000,122736.000000,66300.000000,450.732192)}
{pt3dadd(169188.000000,122868.000000,66475.000000,464.855850)}
{pt3dadd(169260.000000,122868.000000,66675.000000,500.052230)}
{pt3dadd(169296.000000,122844.000000,66825.000000,514.175888)}
{pt3dadd(169380.000000,122856.000000,66950.000000,523.819400)}
{pt3dadd(169524.000000,122868.000000,67050.000000,529.005740)}
{pt3dadd(169524.000000,122940.000000,67225.000000,524.066384)}
{pt3dadd(169656.000000,122928.000000,67375.000000,535.229952)}
{pt3dadd(169884.000000,123072.000000,67575.000000,530.290596)}
{pt3dadd(170064.000000,122976.000000,67750.000000,530.290596)}
{pt3dadd(170136.000000,123012.000000,67925.000000,510.980598)}
{pt3dadd(170256.000000,123072.000000,68075.000000,482.399598)}
{pt3dadd(170304.000000,122904.000000,68225.000000,439.725478)}
{pt3dadd(170328.000000,122844.000000,68350.000000,414.654794)}
{pt3dadd(170436.000000,122820.000000,68525.000000,377.791286)}
{pt3dadd(170460.000000,122784.000000,68650.000000,377.791286)}
{pt3dadd(170604.000000,122832.000000,68750.000000,397.187984)}
{pt3dadd(170748.000000,122844.000000,68900.000000,428.698536)}
{pt3dadd(170856.000000,122868.000000,69050.000000,463.894916)}
{pt3dadd(170976.000000,122916.000000,69225.000000,500.758424)}
{pt3dadd(171072.000000,122988.000000,69375.000000,520.068422)}
{pt3dadd(171168.000000,123060.000000,69525.000000,534.192080)}
{pt3dadd(171132.000000,123084.000000,69675.000000,502.681528)}
{pt3dadd(171300.000000,123108.000000,69850.000000,492.555832)}
{pt3dadd(171384.000000,123048.000000,70000.000000,470.101736)}
{pt3dadd(171384.000000,123048.000000,70000.000000,464.915396)}
{pt3dadd(171384.000000,123048.000000,70150.000000,470.101736)}
{pt3dadd(171348.000000,122952.000000,70300.000000,473.971852)}
{pt3dadd(171384.000000,122952.000000,70300.000000,473.971852)}
{pt3dadd(171468.000000,122952.000000,70450.000000,496.425948)}
{pt3dadd(171492.000000,122976.000000,70575.000000,496.425948)}
{pt3dadd(171564.000000,123000.000000,70675.000000,486.300252)}
{pt3dadd(171720.000000,123048.000000,70800.000000,508.754348)}
{pt3dadd(171708.000000,123024.000000,70800.000000,499.570046)}
{pt3dadd(171660.000000,122976.000000,70925.000000,489.926534)}
{pt3dadd(171780.000000,123036.000000,71075.000000,467.472438)}
{pt3dadd(171876.000000,123072.000000,71175.000000,458.288136)}
{pt3dadd(171948.000000,123036.000000,71250.000000,441.597617)}
{pt3dadd(172092.000000,123012.000000,71425.000000,448.014770)}

{create adhoc21}
{access adhoc21}
{connect adhoc21(1), adhoc20(0)}
{nseg = 1}
{strdef color color = "White"}
{pt3dclear()}
{pt3dadd(172092.000000,123012.000000,71425.000000,448.014770)}
{pt3dadd(171936.000000,122964.000000,71550.000000,495.505270)}
{pt3dadd(171996.000000,123036.000000,71725.000000,487.488630)}
{pt3dadd(172104.000000,123084.000000,71900.000000,479.158192)}
{pt3dadd(172308.000000,123120.000000,72300.000000,461.643452)}
{pt3dadd(172272.000000,123180.000000,72200.000000,434.003016)}
{pt3dadd(172236.000000,123156.000000,72075.000000,414.693018)}
{pt3dadd(172308.000000,123072.000000,72250.000000,432.207758)}
{pt3dadd(172344.000000,123120.000000,72400.000000,454.661854)}
{pt3dadd(172392.000000,123180.000000,72575.000000,477.115950)}
{pt3dadd(172548.000000,123228.000000,72725.000000,489.926534)}
{pt3dadd(172608.000000,123204.000000,72900.000000,485.659726)}
{pt3dadd(172656.000000,123168.000000,73050.000000,464.274870)}
{pt3dadd(172788.000000,123300.000000,73225.000000,434.264830)}
{pt3dadd(172896.000000,123372.000000,73350.000000,415.874364)}
{pt3dadd(172956.000000,123372.000000,73500.000000,407.127410)}
{pt3dadd(172944.000000,123360.000000,73625.000000,403.063780)}
{pt3dadd(173064.000000,123288.000000,73775.000000,410.997526)}
{pt3dadd(173220.000000,123324.000000,73950.000000,436.068210)}
{pt3dadd(173364.000000,123432.000000,74150.000000,444.815164)}
{pt3dadd(173508.000000,123456.000000,74325.000000,458.266274)}
{pt3dadd(173664.000000,123552.000000,74525.000000,454.396158)}
{pt3dadd(173820.000000,123540.000000,74700.000000,446.462412)}
{pt3dadd(173892.000000,123480.000000,74875.000000,428.947672)}
{pt3dadd(173988.000000,123432.000000,75050.000000,408.581144)}
{pt3dadd(174036.000000,123228.000000,75250.000000,383.510460)}
{pt3dadd(174072.000000,123228.000000,75375.000000,387.380576)}
{pt3dadd(174096.000000,123324.000000,75550.000000,424.336770)}
{pt3dadd(174228.000000,123408.000000,75725.000000,432.667208)}
{pt3dadd(174300.000000,123528.000000,75875.000000,453.033736)}
{pt3dadd(174372.000000,123636.000000,76050.000000,464.653310)}
{pt3dadd(174564.000000,123600.000000,76225.000000,464.653310)}
{pt3dadd(174684.000000,123612.000000,76375.000000,439.897670)}
{pt3dadd(174684.000000,123708.000000,76525.000000,444.377816)}
{pt3dadd(174732.000000,123840.000000,76625.000000,449.081972)}
{pt3dadd(174792.000000,123924.000000,76775.000000,467.472438)}
{pt3dadd(174900.000000,124044.000000,76900.000000,495.112874)}
{pt3dadd(174912.000000,124200.000000,77025.000000,537.894280)}
{pt3dadd(174984.000000,124416.000000,77175.000000,576.195540)}
{pt3dadd(175068.000000,124512.000000,77325.000000,616.411872)}
{pt3dadd(175092.000000,124560.000000,77475.000000,645.069620)}
{pt3dadd(175140.000000,124692.000000,77575.000000,675.160256)}
{pt3dadd(175056.000000,124812.000000,77650.000000,675.160256)}
{pt3dadd(175140.000000,124920.000000,77700.000000,668.856242)}
{pt3dadd(175200.000000,125016.000000,77725.000000,649.929174)}
{pt3dadd(175188.000000,125136.000000,77775.000000,649.929174)}
{pt3dadd(175284.000000,125268.000000,77825.000000,643.309946)}
{pt3dadd(175344.000000,125388.000000,77900.000000,637.005932)}
{pt3dadd(175488.000000,125532.000000,77975.000000,637.005932)}
{pt3dadd(175560.000000,125628.000000,78075.000000,625.842364)}
{pt3dadd(175608.000000,125760.000000,78125.000000,632.461592)}
{pt3dadd(175632.000000,125892.000000,78300.000000,608.990184)}
{pt3dadd(175620.000000,126024.000000,78275.000000,581.697094)}
{pt3dadd(175704.000000,126132.000000,78350.000000,569.975342)}
{pt3dadd(175728.000000,126252.000000,78375.000000,569.975342)}
{pt3dadd(175752.000000,126360.000000,78425.000000,529.759010)}
{pt3dadd(175848.000000,126492.000000,78475.000000,535.204652)}
{pt3dadd(175944.000000,126648.000000,78525.000000,535.204652)}
{pt3dadd(175980.000000,126804.000000,78550.000000,524.572670)}
{pt3dadd(176052.000000,126948.000000,78600.000000,524.572670)}
{pt3dadd(176124.000000,127104.000000,78650.000000,540.144008)}
{pt3dadd(176148.000000,127248.000000,78800.000000,534.698366)}
{pt3dadd(176196.000000,127392.000000,78850.000000,544.824062)}
{pt3dadd(176256.000000,127524.000000,78925.000000,550.010402)}
{pt3dadd(176304.000000,127668.000000,78900.000000,550.010402)}
{pt3dadd(176352.000000,127836.000000,78925.000000,544.564760)}
{pt3dadd(176544.000000,128004.000000,79100.000000,550.010402)}
{pt3dadd(176580.000000,128172.000000,79350.000000,555.456044)}
{pt3dadd(176604.000000,128340.000000,79550.000000,560.901686)}
{pt3dadd(176664.000000,128472.000000,79725.000000,537.324880)}
{pt3dadd(176844.000000,128616.000000,79925.000000,589.325948)}
{pt3dadd(176952.000000,128784.000000,79950.000000,601.047700)}
{pt3dadd(177096.000000,128916.000000,80150.000000,606.765626)}
{pt3dadd(177252.000000,129072.000000,80350.000000,618.487378)}
{pt3dadd(177396.000000,129216.000000,80575.000000,636.877844)}
{pt3dadd(177588.000000,129372.000000,80750.000000,590.322418)}
{pt3dadd(177792.000000,129564.000000,80900.000000,573.155024)}
{pt3dadd(177996.000000,129708.000000,81075.000000,547.161604)}
{pt3dadd(178152.000000,129852.000000,81200.000000,506.417404)}
{pt3dadd(178308.000000,129984.000000,81400.000000,469.553896)}
{pt3dadd(178620.000000,130116.000000,81700.000000,436.467818)}
{pt3dadd(178860.000000,130260.000000,81875.000000,408.827382)}
{pt3dadd(179148.000000,130380.000000,82175.000000,418.470894)}
{pt3dadd(179304.000000,130572.000000,82350.000000,436.861360)}
{pt3dadd(179424.000000,130740.000000,82475.000000,484.356850)}
{pt3dadd(179616.000000,130944.000000,82550.000000,511.997286)}
{pt3dadd(179820.000000,131148.000000,82675.000000,539.637722)}
{pt3dadd(180048.000000,131340.000000,82875.000000,568.295470)}
{pt3dadd(180240.000000,131532.000000,83050.000000,578.927452)}
{pt3dadd(180444.000000,131712.000000,83150.000000,596.953218)}
{pt3dadd(180564.000000,131892.000000,83275.000000,596.953218)}
{pt3dadd(180756.000000,132048.000000,83375.000000,620.424626)}
{pt3dadd(180840.000000,132228.000000,83550.000000,608.116786)}
{pt3dadd(180996.000000,132360.000000,83625.000000,608.116786)}
{pt3dadd(181104.000000,132540.000000,83650.000000,579.459038)}
{pt3dadd(181152.000000,132744.000000,83775.000000,579.459038)}
{pt3dadd(181272.000000,132948.000000,83875.000000,545.861934)}
{pt3dadd(181416.000000,133080.000000,84000.000000,529.512026)}
{pt3dadd(181620.000000,133212.000000,84125.000000,509.236532)}
{pt3dadd(181728.000000,133368.000000,84275.000000,486.782436)}
{pt3dadd(181932.000000,133524.000000,84400.000000,492.228078)}
{pt3dadd(182040.000000,133692.000000,84450.000000,470.843222)}
{pt3dadd(182184.000000,133836.000000,84500.000000,470.843222)}
{pt3dadd(182292.000000,133968.000000,84600.000000,491.118716)}
{pt3dadd(182292.000000,134100.000000,84550.000000,524.204794)}
{pt3dadd(182388.000000,134232.000000,84625.000000,513.572812)}
{pt3dadd(182616.000000,134340.000000,84825.000000,513.572812)}
{pt3dadd(182724.000000,134508.000000,85050.000000,491.118716)}
{pt3dadd(182760.000000,134628.000000,85175.000000,462.096268)}
{pt3dadd(182892.000000,134760.000000,85300.000000,425.140074)}
{pt3dadd(183036.000000,134916.000000,85350.000000,395.130034)}
{pt3dadd(183048.000000,135072.000000,85550.000000,391.444206)}
{pt3dadd(183240.000000,135216.000000,85800.000000,391.444206)}
{pt3dadd(183228.000000,135360.000000,85850.000000,409.834672)}
{pt3dadd(183252.000000,135540.000000,85850.000000,431.219528)}
{pt3dadd(183324.000000,135684.000000,85850.000000,451.586056)}
{pt3dadd(183396.000000,135840.000000,85850.000000,476.656740)}
{pt3dadd(183480.000000,135984.000000,85975.000000,480.720370)}
{pt3dadd(183432.000000,136152.000000,86075.000000,475.781014)}
{pt3dadd(183420.000000,136308.000000,86175.000000,466.596712)}
{pt3dadd(183396.000000,136452.000000,86300.000000,476.240224)}
{pt3dadd(183432.000000,136608.000000,86300.000000,476.240224)}
{pt3dadd(183468.000000,136788.000000,86300.000000,489.691334)}
{pt3dadd(183540.000000,136944.000000,86525.000000,499.817030)}
{pt3dadd(183564.000000,137124.000000,86675.000000,513.940688)}
{pt3dadd(183504.000000,137328.000000,86775.000000,524.572670)}
{pt3dadd(183444.000000,137520.000000,86875.000000,529.512026)}
{pt3dadd(183432.000000,137688.000000,87050.000000,534.451382)}
{pt3dadd(183444.000000,137892.000000,87125.000000,534.451382)}
{pt3dadd(183348.000000,138072.000000,87250.000000,534.451382)}
{pt3dadd(183432.000000,138264.000000,87375.000000,534.451382)}
{pt3dadd(183420.000000,138432.000000,87600.000000,563.109130)}
{pt3dadd(183408.000000,138636.000000,87825.000000,568.295470)}
{pt3dadd(183432.000000,138816.000000,88000.000000,598.386106)}
{pt3dadd(183444.000000,138984.000000,88050.000000,614.736014)}
{pt3dadd(183420.000000,139128.000000,88175.000000,620.453940)}
{pt3dadd(183456.000000,139212.000000,88200.000000,614.149926)}
{pt3dadd(183504.000000,139356.000000,88275.000000,625.313494)}
{pt3dadd(183588.000000,139524.000000,88450.000000,625.313494)}
{pt3dadd(183588.000000,139656.000000,88525.000000,637.621334)}
{pt3dadd(183564.000000,139776.000000,88650.000000,631.903408)}
{pt3dadd(183516.000000,139884.000000,88675.000000,620.181656)}
{pt3dadd(183636.000000,140016.000000,88825.000000,603.831748)}
{pt3dadd(183744.000000,140112.000000,88800.000000,590.908506)}
{pt3dadd(183864.000000,140292.000000,89100.000000,584.604492)}
{pt3dadd(183840.000000,140460.000000,89350.000000,584.604492)}
{pt3dadd(183828.000000,140640.000000,89500.000000,602.630258)}
{pt3dadd(183852.000000,140820.000000,89650.000000,613.262240)}
{pt3dadd(184032.000000,140988.000000,89875.000000,601.540488)}
{pt3dadd(184200.000000,141180.000000,89975.000000,584.373094)}
{pt3dadd(184416.000000,141348.000000,90100.000000,578.927452)}
{pt3dadd(184608.000000,141504.000000,90200.000000,578.927452)}
{pt3dadd(184752.000000,141636.000000,90275.000000,578.927452)}
{pt3dadd(184944.000000,141756.000000,90350.000000,573.481810)}
{pt3dadd(185280.000000,141984.000000,90525.000000,558.651958)}
{pt3dadd(185436.000000,142128.000000,90650.000000,575.819352)}
{pt3dadd(185616.000000,142272.000000,90700.000000,552.347944)}
{pt3dadd(185760.000000,142416.000000,90825.000000,552.347944)}
{pt3dadd(185904.000000,142536.000000,90900.000000,547.161604)}
{pt3dadd(185964.000000,142632.000000,90925.000000,573.155024)}
{pt3dadd(186000.000000,142704.000000,90925.000000,567.151198)}
{pt3dadd(186072.000000,142836.000000,91000.000000,567.151198)}
{pt3dadd(186180.000000,142968.000000,91125.000000,561.705556)}
{pt3dadd(186240.000000,143100.000000,91150.000000,578.055464)}
{pt3dadd(186312.000000,143220.000000,91250.000000,566.891896)}
{pt3dadd(186420.000000,143316.000000,91300.000000,561.173970)}
{pt3dadd(186552.000000,143436.000000,91600.000000,572.337538)}
{pt3dadd(186744.000000,143904.000000,91675.000000,577.783180)}
{pt3dadd(186912.000000,144072.000000,91800.000000,556.493916)}
{pt3dadd(186924.000000,144264.000000,91900.000000,556.493916)}
{pt3dadd(186960.000000,144456.000000,92025.000000,545.861934)}
{pt3dadd(187044.000000,144672.000000,92150.000000,529.512026)}
{pt3dadd(187140.000000,144720.000000,92250.000000,518.880044)}
{pt3dadd(187248.000000,144912.000000,92375.000000,509.695742)}
{pt3dadd(187224.000000,145140.000000,92500.000000,490.385744)}
{pt3dadd(187224.000000,145188.000000,92625.000000,467.931648)}
{pt3dadd(187320.000000,145476.000000,92750.000000,441.607436)}
{pt3dadd(187416.000000,145764.000000,92875.000000,413.796450)}
{pt3dadd(187392.000000,145776.000000,92975.000000,387.012000)}

{create adhoc22}
{access adhoc22}
{connect adhoc22(1), adhoc21(0)}
{nseg = 1}
{strdef color color = "White"}
{pt3dclear()}
{pt3dadd(187392.000000,145776.000000,92975.000000,387.012000)}
{pt3dadd(187440.000000,145812.000000,93225.000000,407.346257)}
{pt3dadd(187380.000000,146064.000000,93350.000000,419.763370)}
{pt3dadd(187488.000000,146028.000000,93425.000000,427.697116)}
{pt3dadd(187524.000000,146220.000000,93575.000000,439.897670)}
{pt3dadd(187584.000000,146364.000000,93375.000000,435.630862)}
{pt3dadd(187536.000000,146508.000000,93350.000000,435.630862)}
{pt3dadd(187584.000000,146628.000000,93375.000000,453.145602)}
{pt3dadd(187608.000000,146760.000000,93400.000000,471.536068)}
{pt3dadd(187656.000000,146916.000000,93450.000000,490.846066)}
{pt3dadd(187692.000000,147060.000000,93550.000000,519.868514)}
{pt3dadd(187692.000000,147192.000000,93675.000000,545.861934)}
{pt3dadd(187680.000000,147324.000000,93775.000000,567.151198)}
{pt3dadd(187692.000000,147480.000000,93750.000000,583.501106)}
{pt3dadd(187764.000000,147612.000000,93775.000000,643.547884)}
{pt3dadd(187824.000000,147732.000000,93750.000000,668.192878)}
{pt3dadd(187860.000000,147852.000000,93625.000000,713.399730)}
{pt3dadd(187752.000000,147960.000000,93425.000000,695.017940)}

{create adhoc23}
{access adhoc23}
{connect adhoc23(1), adhoc22(0)}
{nseg = 1}
{strdef color color = "White"}
{pt3dclear()}
{pt3dadd(187752.000000,147960.000000,93425.000000,695.017940)}
{pt3dadd(187968.000000,148512.000000,94050.000000,823.031713)}
{pt3dadd(187896.000000,148680.000000,94325.000000,857.504848)}
{pt3dadd(187968.000000,148932.000000,94500.000000,904.779360)}
{pt3dadd(188184.000000,149172.000000,94775.000000,913.649740)}
{pt3dadd(188256.000000,149436.000000,94975.000000,922.520120)}
{pt3dadd(188340.000000,149688.000000,95175.000000,913.649740)}
{pt3dadd(188520.000000,150168.000000,95400.000000,905.201750)}
{pt3dadd(188676.000000,150372.000000,95700.000000,887.883380)}
{pt3dadd(188676.000000,150576.000000,95975.000000,870.565010)}
{pt3dadd(188784.000000,150732.000000,96125.000000,830.240682)}
{pt3dadd(188844.000000,150936.000000,96375.000000,791.836550)}
{pt3dadd(188796.000000,151116.000000,96550.000000,768.830592)}
{pt3dadd(188952.000000,151296.000000,96750.000000,753.122314)}
{pt3dadd(189096.000000,151584.000000,96925.000000,737.414036)}
{pt3dadd(189024.000000,151740.000000,97100.000000,752.374284)}
{pt3dadd(188976.000000,152040.000000,97250.000000,766.622148)}
{pt3dadd(189036.000000,152136.000000,97500.000000,766.622148)}
{pt3dadd(189096.000000,152256.000000,97675.000000,774.284716)}
{pt3dadd(189120.000000,152460.000000,97800.000000,760.036852)}
{pt3dadd(189132.000000,152568.000000,98000.000000,745.076604)}
{pt3dadd(189096.000000,152772.000000,98200.000000,745.076604)}
{pt3dadd(189132.000000,152940.000000,98425.000000,745.076604)}
{pt3dadd(189180.000000,153096.000000,98600.000000,737.414036)}
{pt3dadd(189240.000000,153384.000000,98800.000000,759.324468)}
{pt3dadd(189312.000000,153420.000000,98975.000000,774.284716)}
{pt3dadd(189252.000000,153564.000000,99150.000000,789.992994)}
{pt3dadd(189384.000000,153612.000000,99400.000000,804.953242)}
{pt3dadd(189576.000000,153756.000000,99600.000000,829.109510)}
{pt3dadd(189756.000000,153852.000000,99850.000000,829.109510)}
{pt3dadd(189636.000000,154188.000000,100100.000000,854.473590)}
{pt3dadd(189708.000000,154452.000000,100350.000000,862.921580)}
{pt3dadd(189828.000000,154656.000000,100550.000000,862.921580)}
{pt3dadd(189924.000000,154872.000000,100800.000000,846.427880)}
{pt3dadd(189984.000000,154872.000000,101025.000000,846.427880)}
{pt3dadd(190056.000000,155004.000000,101250.000000,865.521380)}
{pt3dadd(190128.000000,155220.000000,101500.000000,849.027680)}
{pt3dadd(190200.000000,155340.000000,101750.000000,865.521380)}
{pt3dadd(190428.000000,155508.000000,101950.000000,882.015080)}
{pt3dadd(190596.000000,155664.000000,102175.000000,867.054832)}
{pt3dadd(190728.000000,155820.000000,102425.000000,839.090952)}
{pt3dadd(190908.000000,155976.000000,102650.000000,847.136662)}
{pt3dadd(191052.000000,156132.000000,102925.000000,822.980394)}
{pt3dadd(191196.000000,156360.000000,103150.000000,791.526446)}
{pt3dadd(191328.000000,156504.000000,103400.000000,814.532404)}
{pt3dadd(191340.000000,156648.000000,103700.000000,763.205030)}
{pt3dadd(191340.000000,156756.000000,104000.000000,714.321820)}
{pt3dadd(191412.000000,157044.000000,104225.000000,687.150714)}
{pt3dadd(191520.000000,157296.000000,104475.000000,687.150714)}
{pt3dadd(191652.000000,157488.000000,104800.000000,650.575344)}
{pt3dadd(191784.000000,157644.000000,105050.000000,656.879358)}
{pt3dadd(191856.000000,157800.000000,105325.000000,662.883184)}
{pt3dadd(191904.000000,157944.000000,105600.000000,690.054290)}
{pt3dadd(192000.000000,158508.000000,105700.000000,690.054290)}
{pt3dadd(192024.000000,158676.000000,105975.000000,718.583950)}
{pt3dadd(192000.000000,158700.000000,106175.000000,755.159320)}
{pt3dadd(191856.000000,158616.000000,106475.000000,782.330426)}
{pt3dadd(191700.000000,158748.000000,106700.000000,789.992994)}
{pt3dadd(191664.000000,158904.000000,106925.000000,830.317322)}
{pt3dadd(191592.000000,159084.000000,107125.000000,874.774902)}
{pt3dadd(191328.000000,159276.000000,107375.000000,901.407172)}
{pt3dadd(191172.000000,159312.000000,107575.000000,943.747720)}
{pt3dadd(191028.000000,159408.000000,107800.000000,978.425700)}
{pt3dadd(190932.000000,159468.000000,107825.000000,978.425700)}
{pt3dadd(190836.000000,159324.000000,108000.000000,959.332200)}
{pt3dadd(190668.000000,159384.000000,108275.000000,916.991652)}
{pt3dadd(190536.000000,159408.000000,108475.000000,853.784012)}
{pt3dadd(190272.000000,159348.000000,108725.000000,790.576372)}
{pt3dadd(190032.000000,159276.000000,108975.000000,718.656866)}
{pt3dadd(189864.000000,159324.000000,109200.000000,664.763126)}
{pt3dadd(189720.000000,159492.000000,109350.000000,615.238286)}
{pt3dadd(189648.000000,159708.000000,109575.000000,597.212520)}
{pt3dadd(189588.000000,159696.000000,109775.000000,584.904680)}
{pt3dadd(189504.000000,159732.000000,109975.000000,590.622606)}
{pt3dadd(189432.000000,159888.000000,110150.000000,561.964858)}
{pt3dadd(189408.000000,160044.000000,110325.000000,561.964858)}
{pt3dadd(189204.000000,159888.000000,110475.000000,556.519216)}
{pt3dadd(189096.000000,159924.000000,110675.000000,526.045650)}
{pt3dadd(189036.000000,160188.000000,110900.000000,504.756386)}
{pt3dadd(189036.000000,160344.000000,111100.000000,495.112874)}
{pt3dadd(189048.000000,160428.000000,111250.000000,480.989216)}
{pt3dadd(188736.000000,160380.000000,111450.000000,457.412410)}
{pt3dadd(188424.000000,160260.000000,111625.000000,461.892556)}
{pt3dadd(188292.000000,160380.000000,111800.000000,440.507700)}
{pt3dadd(188400.000000,160500.000000,112025.000000,431.760746)}
{pt3dadd(188256.000000,160560.000000,112175.000000,415.874364)}
{pt3dadd(187992.000000,160440.000000,112325.000000,404.254790)}
{pt3dadd(187788.000000,160380.000000,112525.000000,387.574090)}
{pt3dadd(187536.000000,160500.000000,112750.000000,387.574090)}
{pt3dadd(187500.000000,160572.000000,113000.000000,375.954516)}
{pt3dadd(187212.000000,160428.000000,113200.000000,383.510460)}
{pt3dadd(186924.000000,160380.000000,113475.000000,380.000144)}
{pt3dadd(186600.000000,160356.000000,113575.000000,376.314316)}
{pt3dadd(186456.000000,160404.000000,113800.000000,376.314316)}
{pt3dadd(186468.000000,160440.000000,114000.000000,387.933890)}
{pt3dadd(186192.000000,160404.000000,114225.000000,387.933890)}
{pt3dadd(185928.000000,160368.000000,114425.000000,411.810734)}
{pt3dadd(185724.000000,160332.000000,114650.000000,436.881418)}
{pt3dadd(185520.000000,160296.000000,114900.000000,458.266274)}
{pt3dadd(185364.000000,160344.000000,115150.000000,458.266274)}
{pt3dadd(185340.000000,160548.000000,115375.000000,475.781014)}
{pt3dadd(185088.000000,160668.000000,115625.000000,475.781014)}
{pt3dadd(184716.000000,160704.000000,115925.000000,454.396158)}
{pt3dadd(184404.000000,160752.000000,116150.000000,445.211856)}
{pt3dadd(184128.000000,160740.000000,116350.000000,441.148226)}
{pt3dadd(184020.000000,160584.000000,116550.000000,427.697116)}
{pt3dadd(183816.000000,160740.000000,116800.000000,418.950162)}
{pt3dadd(183672.000000,160776.000000,117000.000000,426.883908)}
{pt3dadd(183456.000000,160776.000000,117225.000000,418.553470)}
{pt3dadd(183240.000000,160764.000000,117450.000000,410.997526)}
{pt3dadd(183036.000000,160752.000000,117625.000000,415.264334)}
{pt3dadd(182820.000000,160740.000000,117800.000000,415.264334)}
{pt3dadd(182712.000000,160752.000000,117975.000000,419.531142)}
{pt3dadd(182604.000000,160752.000000,118175.000000,441.985238)}
{pt3dadd(182292.000000,160824.000000,118350.000000,462.351766)}
{pt3dadd(181980.000000,160896.000000,118525.000000,476.475424)}
{pt3dadd(181680.000000,160968.000000,118675.000000,500.052230)}
{pt3dadd(181584.000000,161052.000000,118875.000000,524.807870)}
{pt3dadd(181500.000000,161148.000000,119025.000000,519.868514)}
{pt3dadd(181404.000000,161136.000000,119250.000000,571.739186)}
{pt3dadd(181092.000000,161064.000000,119375.000000,613.966346)}
{pt3dadd(180780.000000,161052.000000,119525.000000,644.056982)}
{pt3dadd(180396.000000,161148.000000,119650.000000,682.949840)}
{pt3dadd(180252.000000,161148.000000,119825.000000,737.414036)}
{pt3dadd(180120.000000,160992.000000,119950.000000,744.711716)}
{pt3dadd(179904.000000,160992.000000,120125.000000,724.838290)}
{pt3dadd(179688.000000,161028.000000,120325.000000,731.788474)}
{pt3dadd(179556.000000,161064.000000,120325.000000,724.490794)}
{pt3dadd(179400.000000,161052.000000,120625.000000,703.623702)}
{pt3dadd(179376.000000,161100.000000,120825.000000,664.730844)}
{pt3dadd(178872.000000,161220.000000,121100.000000,671.034858)}
{pt3dadd(178332.000000,161472.000000,121275.000000,645.157606)}
{pt3dadd(178176.000000,161556.000000,121575.000000,613.562428)}
{pt3dadd(177924.000000,161448.000000,121800.000000,590.091020)}
{pt3dadd(177600.000000,161400.000000,121950.000000,579.459038)}
{pt3dadd(177288.000000,161400.000000,122075.000000,555.987630)}
{pt3dadd(177132.000000,161448.000000,122325.000000,534.698366)}
{pt3dadd(176880.000000,161484.000000,122500.000000,494.056344)}
{pt3dadd(176592.000000,161520.000000,122700.000000,458.859964)}
{pt3dadd(176256.000000,161532.000000,122925.000000,432.535752)}
{pt3dadd(175788.000000,161532.000000,123125.000000,401.025200)}
{pt3dadd(174828.000000,161508.000000,123275.000000,383.510460)}
{pt3dadd(174084.000000,161484.000000,123400.000000,418.706840)}
{pt3dadd(173688.000000,161412.000000,123650.000000,426.262784)}
{pt3dadd(173088.000000,161352.000000,123725.000000,412.539528)}
{pt3dadd(172848.000000,161232.000000,123900.000000,405.343384)}
{pt3dadd(172512.000000,161064.000000,124100.000000,450.151214)}
{pt3dadd(171888.000000,160908.000000,124200.000000,518.645982)}
{pt3dadd(171252.000000,160812.000000,124325.000000,590.624918)}
{pt3dadd(170844.000000,160836.000000,124500.000000,680.197226)}
{pt3dadd(170304.000000,160944.000000,124650.000000,778.950700)}
{pt3dadd(169536.000000,160956.000000,124825.000000,791.873942)}
{pt3dadd(169248.000000,160884.000000,125025.000000,734.542742)}
{pt3dadd(168504.000000,160668.000000,125125.000000,690.204242)}
{pt3dadd(167988.000000,160608.000000,125325.000000,657.029310)}
{pt3dadd(167280.000000,160548.000000,125425.000000,573.405726)}
{pt3dadd(167304.000000,160548.000000,125600.000000,515.674654)}
{pt3dadd(166848.000000,160524.000000,125775.000000,438.698686)}
{pt3dadd(166644.000000,160572.000000,125900.000000,393.464878)}
{pt3dadd(166392.000000,160632.000000,126075.000000,367.471458)}
{pt3dadd(165336.000000,160800.000000,126125.000000,371.738266)}
{pt3dadd(164700.000000,161448.000000,126125.000000,399.378702)}
{pt3dadd(163944.000000,162168.000000,126125.000000,465.191102)}
{pt3dadd(163644.000000,162216.000000,126150.000000,500.299214)}
{pt3dadd(163476.000000,162492.000000,126300.000000,500.299214)}
{pt3dadd(163212.000000,162792.000000,126300.000000,496.032406)}
{pt3dadd(162996.000000,162948.000000,126375.000000,501.478048)}
{pt3dadd(162768.000000,163188.000000,126550.000000,506.923690)}
{pt3dadd(162552.000000,163332.000000,126675.000000,502.219534)}
{pt3dadd(162348.000000,163452.000000,126575.000000,517.049386)}
{pt3dadd(162216.000000,163620.000000,126575.000000,557.793586)}
{pt3dadd(161952.000000,163896.000000,126625.000000,575.819352)}
{pt3dadd(161832.000000,164076.000000,126775.000000,593.845118)}
{pt3dadd(161616.000000,164268.000000,126925.000000,632.146378)}
{pt3dadd(161412.000000,164424.000000,127100.000000,655.617786)}
{pt3dadd(161160.000000,164664.000000,127175.000000,649.613960)}
{pt3dadd(161100.000000,164892.000000,127250.000000,637.306120)}
{pt3dadd(161052.000000,165108.000000,127225.000000,658.173212)}
{pt3dadd(160860.000000,165288.000000,127250.000000,634.701804)}
{pt3dadd(160476.000000,165432.000000,127350.000000,611.230396)}
{pt3dadd(160164.000000,165636.000000,127450.000000,594.880488)}
{pt3dadd(160008.000000,165804.000000,127475.000000,600.884314)}
{pt3dadd(159912.000000,165972.000000,127475.000000,593.586634)}
{pt3dadd(159504.000000,166500.000000,127575.000000,637.925134)}
{pt3dadd(159084.000000,167184.000000,127750.000000,668.015770)}
{pt3dadd(158556.000000,167808.000000,128025.000000,684.365678)}
{pt3dadd(158040.000000,168324.000000,128150.000000,684.365678)}
{pt3dadd(157812.000000,168696.000000,128350.000000,664.492252)}
{pt3dadd(157392.000000,169140.000000,128525.000000,620.153752)}
{pt3dadd(157020.000000,169440.000000,128675.000000,607.230510)}
{pt3dadd(156684.000000,169896.000000,128825.000000,619.538350)}
{pt3dadd(156720.000000,170100.000000,129050.000000,632.461592)}
{pt3dadd(156576.000000,170196.000000,129250.000000,659.632698)}
{pt3dadd(156180.000000,170364.000000,129475.000000,683.104106)}
{pt3dadd(156084.000000,170640.000000,129650.000000,683.104106)}
{pt3dadd(155964.000000,171072.000000,129825.000000,640.322700)}
{pt3dadd(155556.000000,171468.000000,129975.000000,600.106368)}
{pt3dadd(155172.000000,171576.000000,130075.000000,550.581528)}
{pt3dadd(154956.000000,171732.000000,130250.000000,521.923780)}
{pt3dadd(154740.000000,171876.000000,130450.000000,534.847022)}
{pt3dadd(154548.000000,171912.000000,130625.000000,571.324414)}
{pt3dadd(154020.000000,172008.000000,130875.000000,592.613678)}
{pt3dadd(153516.000000,172092.000000,131025.000000,587.674322)}
{pt3dadd(152784.000000,172572.000000,131275.000000,622.951298)}
{pt3dadd(152400.000000,172728.000000,131425.000000,622.951298)}
{pt3dadd(151980.000000,172884.000000,131125.000000,642.824724)}
{pt3dadd(151788.000000,172932.000000,131075.000000,661.751792)}
{pt3dadd(151512.000000,173004.000000,131025.000000,689.044882)}
{pt3dadd(151152.000000,173388.000000,131075.000000,682.425654)}
{pt3dadd(150852.000000,173556.000000,131000.000000,663.498586)}
{pt3dadd(150576.000000,173844.000000,130950.000000,649.929174)}
{pt3dadd(150324.000000,174096.000000,130875.000000,643.309946)}
{pt3dadd(150132.000000,174180.000000,130800.000000,649.613960)}
{pt3dadd(149904.000000,174348.000000,130825.000000,656.233188)}
{pt3dadd(149712.000000,174444.000000,130875.000000,675.160256)}
{pt3dadd(149520.000000,174564.000000,130900.000000,681.779484)}
{pt3dadd(149328.000000,174756.000000,130950.000000,669.471644)}
{pt3dadd(149136.000000,174888.000000,130925.000000,640.813896)}
{pt3dadd(148956.000000,175176.000000,131025.000000,579.212708)}
{pt3dadd(148752.000000,175344.000000,131100.000000,538.996376)}
{pt3dadd(148572.000000,175476.000000,131225.000000,508.905740)}
{pt3dadd(148344.000000,175848.000000,131425.000000,497.742172)}
{pt3dadd(148128.000000,176028.000000,131575.000000,502.928512)}
{pt3dadd(147948.000000,176280.000000,131750.000000,545.602632)}
{pt3dadd(147780.000000,176424.000000,131750.000000,550.541988)}
{pt3dadd(147600.000000,176508.000000,131775.000000,545.355648)}
{pt3dadd(147444.000000,176556.000000,131900.000000,562.523042)}
{pt3dadd(147252.000000,176724.000000,132100.000000,557.336702)}
{pt3dadd(147108.000000,176940.000000,132225.000000,536.047438)}
{pt3dadd(146964.000000,177168.000000,132350.000000,536.047438)}
{pt3dadd(146808.000000,177348.000000,132500.000000,541.233778)}
{pt3dadd(146628.000000,177420.000000,132575.000000,529.512026)}
{pt3dadd(146448.000000,177576.000000,132850.000000,524.572670)}
{pt3dadd(146268.000000,177588.000000,133125.000000,519.868514)}
{pt3dadd(145656.000000,177684.000000,133425.000000,497.414418)}
{pt3dadd(145380.000000,177816.000000,133650.000000,482.584566)}
{pt3dadd(145212.000000,178104.000000,133850.000000,449.498488)}
{pt3dadd(145056.000000,178320.000000,134175.000000,449.498488)}
{pt3dadd(144624.000000,178620.000000,134400.000000,436.687904)}
{pt3dadd(144168.000000,178788.000000,134650.000000,436.687904)}
{pt3dadd(144060.000000,178992.000000,134875.000000,423.877320)}
{pt3dadd(143736.000000,179532.000000,135125.000000,420.007204)}
{pt3dadd(143412.000000,179604.000000,135375.000000,391.426204)}
{pt3dadd(143196.000000,179604.000000,135525.000000,387.556088)}
{pt3dadd(143016.000000,179772.000000,135700.000000,380.000144)}
{pt3dadd(142824.000000,179940.000000,135875.000000,372.444200)}
{pt3dadd(142596.000000,180048.000000,136050.000000,384.644754)}
{pt3dadd(142452.000000,180240.000000,136225.000000,391.840898)}
{pt3dadd(141900.000000,181452.000000,136375.000000,381.301602)}
{pt3dadd(141036.000000,183792.000000,136500.000000,433.665376)}
{pt3dadd(141612.000000,183168.000000,136625.000000,430.155060)}
{pt3dadd(141804.000000,182256.000000,136775.000000,407.415210)}
{pt3dadd(142032.000000,180780.000000,136900.000000,407.415210)}
{pt3dadd(141984.000000,180852.000000,137000.000000,414.268678)}
{pt3dadd(141924.000000,180828.000000,137100.000000,361.904904)}
{pt3dadd(141768.000000,180960.000000,137200.000000,369.101048)}
{pt3dadd(141660.000000,181104.000000,137325.000000,375.954516)}
{pt3dadd(141732.000000,181212.000000,137475.000000,362.231260)}
{pt3dadd(141636.000000,181308.000000,137675.000000,355.377792)}
{pt3dadd(141528.000000,181428.000000,137800.000000,336.669660)}
{pt3dadd(141492.000000,181536.000000,137925.000000,317.026120)}
{pt3dadd(141888.000000,181764.000000,138100.000000,303.956348)}
{pt3dadd(142032.000000,181716.000000,138325.000000,292.666194)}
{pt3dadd(142260.000000,181884.000000,138500.000000,278.192080)}
{pt3dadd(142008.000000,181824.000000,138675.000000,273.077914)}
{pt3dadd(141864.000000,182004.000000,138875.000000,278.998198)}
{pt3dadd(141780.000000,182016.000000,139075.000000,273.359838)}
{pt3dadd(141744.000000,181992.000000,139250.000000,281.617648)}
{pt3dadd(141636.000000,182124.000000,139425.000000,286.987518)}
{pt3dadd(141192.000000,182172.000000,139575.000000,286.987518)}
{pt3dadd(141324.000000,182196.000000,139775.000000,268.563954)}
{pt3dadd(141156.000000,182472.000000,140000.000000,265.944504)}
{pt3dadd(140940.000000,182520.000000,140175.000000,248.398256)}
{pt3dadd(140892.000000,182700.000000,140375.000000,235.894976)}
{pt3dadd(140808.000000,182820.000000,140575.000000,229.101254)}
{pt3dadd(140760.000000,182988.000000,140775.000000,209.045674)}
{pt3dadd(140652.000000,183168.000000,140950.000000,199.757236)}
{pt3dadd(140580.000000,183276.000000,141175.000000,187.287444)}
{pt3dadd(140424.000000,183528.000000,141350.000000,175.802274)}
{pt3dadd(140496.000000,183660.000000,141525.000000,166.472132)}
{pt3dadd(140304.000000,183720.000000,141700.000000,188.790492)}
{pt3dadd(140160.000000,183792.000000,141875.000000,184.783412)}
{pt3dadd(140028.000000,183876.000000,142075.000000,195.200796)}
{pt3dadd(139704.000000,183972.000000,142250.000000,187.890386)}
{pt3dadd(139512.000000,184092.000000,142450.000000,186.282272)}
{pt3dadd(139440.000000,184200.000000,142625.000000,181.864464)}
{pt3dadd(139380.000000,184260.000000,142800.000000,180.002872)}
{pt3dadd(139428.000000,184296.000000,143025.000000,172.725138)}
{pt3dadd(139104.000000,184476.000000,143225.000000,176.895898)}
{pt3dadd(139188.000000,184596.000000,143425.000000,181.965482)}
{pt3dadd(138936.000000,184512.000000,143650.000000,177.958402)}
{pt3dadd(138792.000000,184440.000000,143850.000000,181.774666)}
{pt3dadd(138828.000000,184596.000000,144075.000000,187.097728)}
{pt3dadd(138384.000000,184584.000000,144250.000000,206.361242)}
{pt3dadd(138804.000000,184896.000000,144475.000000,219.023636)}
{pt3dadd(138768.000000,184884.000000,144700.000000,229.824438)}
{pt3dadd(138600.000000,184992.000000,144875.000000,241.165284)}
{pt3dadd(138720.000000,185160.000000,145050.000000,257.080252)}
{pt3dadd(138528.000000,185232.000000,145225.000000,267.832778)}
{pt3dadd(138480.000000,185340.000000,145400.000000,275.697364)}
{pt3dadd(138036.000000,185616.000000,145575.000000,257.965386)}
{pt3dadd(137772.000000,185712.000000,145750.000000,263.335256)}
{pt3dadd(137268.000000,185844.000000,145925.000000,272.005960)}
{pt3dadd(136836.000000,185916.000000,146075.000000,281.565416)}
{pt3dadd(136488.000000,185880.000000,146225.000000,290.669660)}
{pt3dadd(136104.000000,185868.000000,146375.000000,325.370468)}
{pt3dadd(135768.000000,186144.000000,146525.000000,357.214562)}
{pt3dadd(135480.000000,186036.000000,146775.000000,360.398522)}
{pt3dadd(135264.000000,185784.000000,147100.000000,342.581256)}
{pt3dadd(134904.000000,186144.000000,147375.000000,316.766296)}
{pt3dadd(134772.000000,186324.000000,147575.000000,280.533952)}
{pt3dadd(134544.000000,186468.000000,147825.000000,224.701408)}
{pt3dadd(134496.000000,186612.000000,147950.000000,187.010454)}
{pt3dadd(134076.000000,186552.000000,148250.000000,159.821464)}
{pt3dadd(134028.000000,186696.000000,148400.000000,146.556320)}
{pt3dadd(133740.000000,186852.000000,148625.000000,143.708560)}
{pt3dadd(133452.000000,186972.000000,148875.000000,147.170030)}
{pt3dadd(133464.000000,186876.000000,149225.000000,173.006320)}
{pt3dadd(133032.000000,187536.000000,149800.000000,225.208720)}
{pt3dadd(132732.000000,188316.000000,150125.000000,267.631976)}
{pt3dadd(132516.000000,188808.000000,150625.000000,289.743250)}
{pt3dadd(131748.000000,188856.000000,151100.000000,304.900360)}
{pt3dadd(130776.000000,189564.000000,151525.000000,266.948272)}
{pt3dadd(130152.000000,190008.000000,152050.000000,207.455041)}
{pt3dadd(130152.000000,190524.000000,152600.000000,152.719399)}
{pt3dadd(130032.000000,190224.000000,152800.000000,122.569985)}
{pt3dadd(130080.000000,190296.000000,153050.000000,88.090164)}
{pt3dadd(129912.000000,190272.000000,153300.000000,95.033812)}
{pt3dadd(129900.000000,189984.000000,153550.000000,116.218115)}
{pt3dadd(129780.000000,189768.000000,153800.000000,167.610605)}
{pt3dadd(129936.000000,189036.000000,154025.000000,218.072001)}
{pt3dadd(130080.000000,188796.000000,153900.000000,281.435348)}
{pt3dadd(130020.000000,187848.000000,153900.000000,327.641604)}
{pt3dadd(129480.000000,187332.000000,153750.000000,352.227276)}
{pt3dadd(129132.000000,186912.000000,153925.000000,346.010972)}
{pt3dadd(129408.000000,186564.000000,153750.000000,357.077232)}
{pt3dadd(129108.000000,186012.000000,153575.000000,346.010972)}
{pt3dadd(128508.000000,185484.000000,153500.000000,365.407670)}
{pt3dadd(128484.000000,185352.000000,153150.000000,379.130926)}
{pt3dadd(127812.000000,184296.000000,152700.000000,432.842720)}
{pt3dadd(126864.000000,183372.000000,152400.000000,465.928798)}
{pt3dadd(126492.000000,183000.000000,152625.000000,528.106902)}
{pt3dadd(126024.000000,182712.000000,152875.000000,577.507536)}
{pt3dadd(125640.000000,182556.000000,152975.000000,563.784280)}
{pt3dadd(125280.000000,182208.000000,153250.000000,530.698202)}
{pt3dadd(124812.000000,181524.000000,153225.000000,474.098468)}
{pt3dadd(124404.000000,181548.000000,153125.000000,372.344868)}
{pt3dadd(123960.000000,181260.000000,153325.000000,288.349720)}
{pt3dadd(123048.000000,180648.000000,153650.000000,298.387148)}
{pt3dadd(122028.000000,180036.000000,154000.000000,290.831204)}
{pt3dadd(121560.000000,180060.000000,154475.000000,303.278600)}
{pt3dadd(121008.000000,180228.000000,154600.000000,346.364412)}
{pt3dadd(120540.000000,180336.000000,154550.000000,346.364412)}
{pt3dadd(120168.000000,180348.000000,154700.000000,339.510944)}
{pt3dadd(119820.000000,180336.000000,154725.000000,329.473516)}
{pt3dadd(119436.000000,180384.000000,154750.000000,322.946404)}
{pt3dadd(119064.000000,180192.000000,154950.000000,319.436088)}
{pt3dadd(118716.000000,180216.000000,155075.000000,341.830048)}
{pt3dadd(118356.000000,180180.000000,155300.000000,356.239460)}
{pt3dadd(117996.000000,180252.000000,155400.000000,377.896462)}
{pt3dadd(117624.000000,180456.000000,155500.000000,395.489834)}
{pt3dadd(117276.000000,180576.000000,155325.000000,402.685978)}
{pt3dadd(116928.000000,180564.000000,155375.000000,388.962722)}
{pt3dadd(116592.000000,180600.000000,155600.000000,344.922086)}
{pt3dadd(116244.000000,180708.000000,155750.000000,298.679412)}
{pt3dadd(115896.000000,180636.000000,155850.000000,252.865826)}
{pt3dadd(115548.000000,180516.000000,155900.000000,218.563978)}
{pt3dadd(115212.000000,180600.000000,156075.000000,197.985386)}
{pt3dadd(114864.000000,180456.000000,156125.000000,208.271866)}
{pt3dadd(114600.000000,180564.000000,156175.000000,224.186834)}
{pt3dadd(114336.000000,180720.000000,156600.000000,249.374704)}
{pt3dadd(114012.000000,181176.000000,157075.000000,283.676552)}
{pt3dadd(113676.000000,181620.000000,157350.000000,310.782256)}
{pt3dadd(112956.000000,182088.000000,157575.000000,323.910696)}
{pt3dadd(112584.000000,182172.000000,157600.000000,323.910696)}
{pt3dadd(112236.000000,182208.000000,157900.000000,323.910696)}
{pt3dadd(111768.000000,182436.000000,157900.000000,291.763876)}
{pt3dadd(111228.000000,182772.000000,157900.000000,279.316480)}
{pt3dadd(110400.000000,183060.000000,157975.000000,273.678120)}
{pt3dadd(109932.000000,183132.000000,158500.000000,279.316480)}
{pt3dadd(109476.000000,183192.000000,158575.000000,296.072080)}
{pt3dadd(109128.000000,183312.000000,158675.000000,324.533072)}
{pt3dadd(108744.000000,183372.000000,158725.000000,327.421012)}
{pt3dadd(108408.000000,183348.000000,158850.000000,324.801562)}
{pt3dadd(108060.000000,183396.000000,158900.000000,314.049036)}
{pt3dadd(107592.000000,183528.000000,159050.000000,279.747188)}
{pt3dadd(107232.000000,183552.000000,159250.000000,261.039056)}
{pt3dadd(106872.000000,183468.000000,159400.000000,250.286530)}
{pt3dadd(106524.000000,183492.000000,159400.000000,258.544340)}
{pt3dadd(106116.000000,183516.000000,159475.000000,249.698210)}
{pt3dadd(105744.000000,183480.000000,159575.000000,254.116018)}
{pt3dadd(105408.000000,183600.000000,159825.000000,246.625938)}
{pt3dadd(104940.000000,183492.000000,159900.000000,263.594768)}
{pt3dadd(104592.000000,183552.000000,159850.000000,284.220484)}
{pt3dadd(104208.000000,183444.000000,159800.000000,303.819140)}
{pt3dadd(103752.000000,183492.000000,159725.000000,306.195054)}
{pt3dadd(103380.000000,183456.000000,159575.000000,311.065684)}
{pt3dadd(103008.000000,183288.000000,159550.000000,304.849380)}
{pt3dadd(102624.000000,183252.000000,159700.000000,297.293436)}
{pt3dadd(102336.000000,183180.000000,159800.000000,310.363208)}
{pt3dadd(102060.000000,183072.000000,159800.000000,337.871334)}
{pt3dadd(101772.000000,183060.000000,159850.000000,352.345448)}
{pt3dadd(101484.000000,183192.000000,159875.000000,358.561752)}
{pt3dadd(101196.000000,183204.000000,159850.000000,351.708284)}
{pt3dadd(100908.000000,183180.000000,159725.000000,344.854816)}
{pt3dadd(100620.000000,183084.000000,159850.000000,331.131560)}
{pt3dadd(100236.000000,183120.000000,160100.000000,324.915256)}
{pt3dadd(99948.000000,183000.000000,160050.000000,307.946426)}
{pt3dadd(99660.000000,182820.000000,160075.000000,290.977596)}
{pt3dadd(99360.000000,182808.000000,160225.000000,271.632852)}
{pt3dadd(99084.000000,182976.000000,160300.000000,257.847982)}
{pt3dadd(98784.000000,183156.000000,160325.000000,247.095456)}
{pt3dadd(98496.000000,183168.000000,160125.000000,240.301734)}
{pt3dadd(98208.000000,183240.000000,160200.000000,233.508012)}
{pt3dadd(97932.000000,183300.000000,160275.000000,233.508012)}
{pt3dadd(97740.000000,183372.000000,160150.000000,231.132098)}
{pt3dadd(97428.000000,183324.000000,160150.000000,236.246264)}
{pt3dadd(97140.000000,183312.000000,160175.000000,256.824856)}
{pt3dadd(96852.000000,183396.000000,159900.000000,280.587408)}
{pt3dadd(96564.000000,183276.000000,160000.000000,299.932152)}
{pt3dadd(96264.000000,183264.000000,160100.000000,316.092936)}
{pt3dadd(95988.000000,183264.000000,160075.000000,318.843356)}
{pt3dadd(95712.000000,183240.000000,160125.000000,312.923072)}
{pt3dadd(95424.000000,183192.000000,160125.000000,298.448958)}
{pt3dadd(95160.000000,183156.000000,160050.000000,267.044784)}
{pt3dadd(94896.000000,183192.000000,159975.000000,237.136050)}
{pt3dadd(94608.000000,183228.000000,160125.000000,222.477742)}
{pt3dadd(94332.000000,183420.000000,160175.000000,201.950762)}
{pt3dadd(94056.000000,183480.000000,160050.000000,197.080132)}
{pt3dadd(93792.000000,183492.000000,159950.000000,211.515476)}
{pt3dadd(93516.000000,183612.000000,159900.000000,230.134056)}
{pt3dadd(93240.000000,183648.000000,159850.000000,244.792364)}
{pt3dadd(92964.000000,183636.000000,159800.000000,268.207284)}
{pt3dadd(92676.000000,183672.000000,159825.000000,273.077914)}
{pt3dadd(92400.000000,183636.000000,159775.000000,283.830440)}
{pt3dadd(92112.000000,183636.000000,159775.000000,301.647706)}
{pt3dadd(91824.000000,183672.000000,159800.000000,321.291246)}
{pt3dadd(91548.000000,183804.000000,159850.000000,354.727546)}
{pt3dadd(91284.000000,183888.000000,159900.000000,401.125812)}
{pt3dadd(91020.000000,183924.000000,159925.000000,460.555532)}
{pt3dadd(90744.000000,183960.000000,159950.000000,499.262228)}
{pt3dadd(90480.000000,184008.000000,159900.000000,515.942928)}
{pt3dadd(90192.000000,184176.000000,159950.000000,503.132344)}
{pt3dadd(89916.000000,184332.000000,159925.000000,485.617604)}
{pt3dadd(89616.000000,184476.000000,159975.000000,426.187884)}
{pt3dadd(89340.000000,184560.000000,160025.000000,380.954076)}
{pt3dadd(89052.000000,184440.000000,160200.000000,357.077232)}
{pt3dadd(88764.000000,184260.000000,160250.000000,336.451516)}
{pt3dadd(88488.000000,184248.000000,160275.000000,312.937860)}
{pt3dadd(88200.000000,184272.000000,160425.000000,312.937860)}
{pt3dadd(87960.000000,184296.000000,160500.000000,316.121820)}
{pt3dadd(87684.000000,184320.000000,160475.000000,312.778668)}
{pt3dadd(87396.000000,184296.000000,160500.000000,325.848440)}
{pt3dadd(87108.000000,184332.000000,160600.000000,345.491980)}
{pt3dadd(86820.000000,184320.000000,160550.000000,362.247580)}
{pt3dadd(86532.000000,184296.000000,160450.000000,356.031276)}
{pt3dadd(86244.000000,184152.000000,160400.000000,366.570572)}
{pt3dadd(85968.000000,184140.000000,160375.000000,378.190146)}
{pt3dadd(85692.000000,184128.000000,160375.000000,390.390700)}
{pt3dadd(85404.000000,184164.000000,160400.000000,407.071400)}
{pt3dadd(85128.000000,183960.000000,160400.000000,445.211856)}
{pt3dadd(84840.000000,183720.000000,160450.000000,453.145602)}
{pt3dadd(84576.000000,183684.000000,160575.000000,445.211856)}
{pt3dadd(84300.000000,183492.000000,160675.000000,436.881418)}
{pt3dadd(84024.000000,183348.000000,160750.000000,428.134464)}
{pt3dadd(83748.000000,183240.000000,160875.000000,396.210312)}
{pt3dadd(83484.000000,183204.000000,160925.000000,409.661422)}
{pt3dadd(83220.000000,183108.000000,160800.000000,402.465278)}
{pt3dadd(82932.000000,183180.000000,160925.000000,388.055866)}
{pt3dadd(82656.000000,183036.000000,160800.000000,372.925976)}
{pt3dadd(82392.000000,183012.000000,160700.000000,369.742016)}
{pt3dadd(82116.000000,183168.000000,160825.000000,331.601560)}
{pt3dadd(81840.000000,183120.000000,160825.000000,331.601560)}
{pt3dadd(81576.000000,183048.000000,160800.000000,338.455028)}
{pt3dadd(81240.000000,183000.000000,160750.000000,362.331872)}
{pt3dadd(81012.000000,183012.000000,160625.000000,392.735828)}
{pt3dadd(80760.000000,182760.000000,160500.000000,430.876284)}
{pt3dadd(80508.000000,182772.000000,160550.000000,450.272982)}
{pt3dadd(80244.000000,182604.000000,160650.000000,466.159364)}
{pt3dadd(79908.000000,182340.000000,160500.000000,480.989216)}
{pt3dadd(79656.000000,182076.000000,160500.000000,464.308516)}
{pt3dadd(79308.000000,181836.000000,160300.000000,435.727516)}
{pt3dadd(78960.000000,181692.000000,160175.000000,412.987666)}
{pt3dadd(78624.000000,181920.000000,160225.000000,381.143572)}
{pt3dadd(78384.000000,182100.000000,160400.000000,342.436876)}
{pt3dadd(78144.000000,182304.000000,160525.000000,331.897580)}
{pt3dadd(77892.000000,182292.000000,160550.000000,328.554428)}
{pt3dadd(77652.000000,182220.000000,160525.000000,306.946904)}
{pt3dadd(77412.000000,182328.000000,160625.000000,294.443624)}
{pt3dadd(77160.000000,182400.000000,160600.000000,276.626358)}
{pt3dadd(76908.000000,182520.000000,160575.000000,267.522114)}
{pt3dadd(76644.000000,182316.000000,160625.000000,264.338154)}
{pt3dadd(76356.000000,182388.000000,160750.000000,300.355090)}
{pt3dadd(76080.000000,182280.000000,160850.000000,296.147654)}
{pt3dadd(75816.000000,182268.000000,160875.000000,296.147654)}
{pt3dadd(75552.000000,182388.000000,161025.000000,277.482266)}
{pt3dadd(75204.000000,182520.000000,160925.000000,245.965418)}
{pt3dadd(74844.000000,182532.000000,160875.000000,209.948482)}
{pt3dadd(74484.000000,182652.000000,160650.000000,216.418698)}
{pt3dadd(74208.000000,182712.000000,160900.000000,203.123180)}
{pt3dadd(73932.000000,182772.000000,161050.000000,234.235964)}
{pt3dadd(73560.000000,182640.000000,161050.000000,279.476068)}
{pt3dadd(73116.000000,182760.000000,161475.000000,291.979348)}
{pt3dadd(72768.000000,182652.000000,161625.000000,296.849978)}
{pt3dadd(72432.000000,182664.000000,161900.000000,327.962762)}
{pt3dadd(72168.000000,182688.000000,162025.000000,324.619610)}
{pt3dadd(71880.000000,182568.000000,161950.000000,299.606200)}
{pt3dadd(71604.000000,182616.000000,162000.000000,291.741614)}
{pt3dadd(71328.000000,182640.000000,162150.000000,439.352624)}
{pt3dadd(71064.000000,182592.000000,162275.000000,503.805440)}
{pt3dadd(70776.000000,182592.000000,162475.000000,1000.000000)}

{create adhoc24}
{access adhoc24}
{connect adhoc24(1), adhoc22(0)}
{nseg = 1}
{strdef color color = "White"}
{pt3dclear()}
{pt3dadd(187752.000000,147960.000000,93425.000000,695.017940)}
{pt3dadd(187836.000000,147960.000000,92875.000000,476.384587)}
{pt3dadd(187932.000000,147960.000000,92350.000000,410.751512)}
{pt3dadd(187908.000000,147960.000000,91850.000000,370.535180)}
{pt3dadd(187764.000000,147960.000000,91350.000000,365.595824)}
{pt3dadd(187668.000000,147924.000000,91000.000000,412.098226)}
{pt3dadd(187548.000000,147864.000000,90700.000000,463.367122)}
{pt3dadd(187548.000000,148140.000000,90575.000000,489.691334)}
{pt3dadd(187440.000000,148080.000000,90400.000000,499.817030)}
{pt3dadd(187476.000000,148056.000000,90275.000000,515.388368)}
{pt3dadd(187488.000000,148008.000000,90100.000000,534.698366)}
{pt3dadd(187380.000000,147936.000000,90000.000000,539.637722)}
{pt3dadd(187320.000000,147852.000000,89850.000000,539.637722)}
{pt3dadd(187224.000000,147768.000000,89700.000000,534.451382)}
{pt3dadd(187200.000000,147768.000000,89550.000000,518.880044)}
{pt3dadd(187140.000000,147696.000000,89425.000000,518.880044)}
{pt3dadd(186996.000000,147576.000000,89200.000000,518.880044)}
{pt3dadd(186960.000000,147528.000000,89050.000000,518.880044)}
{pt3dadd(186840.000000,147468.000000,88900.000000,513.940688)}
{pt3dadd(186672.000000,147360.000000,88750.000000,518.880044)}
{pt3dadd(186600.000000,147348.000000,88575.000000,504.050192)}
{pt3dadd(186504.000000,147336.000000,88475.000000,477.725980)}
{pt3dadd(186384.000000,147252.000000,88275.000000,477.725980)}
{pt3dadd(186060.000000,147096.000000,88025.000000,473.021824)}
{pt3dadd(185760.000000,146832.000000,87875.000000,473.021824)}
{pt3dadd(185520.000000,146532.000000,87625.000000,487.851676)}
{pt3dadd(185472.000000,146460.000000,87350.000000,524.807870)}
{pt3dadd(185304.000000,146364.000000,87125.000000,541.157778)}
{pt3dadd(185088.000000,146304.000000,86925.000000,579.459038)}
{pt3dadd(184800.000000,146280.000000,86600.000000,614.736014)}
{pt3dadd(184596.000000,146232.000000,86400.000000,614.736014)}
{pt3dadd(184452.000000,146088.000000,86225.000000,632.761780)}
{pt3dadd(184368.000000,146052.000000,86000.000000,621.598212)}
{pt3dadd(184320.000000,145992.000000,85800.000000,603.572446)}
{pt3dadd(184224.000000,145872.000000,85625.000000,578.927452)}
{pt3dadd(184188.000000,145704.000000,85400.000000,573.741112)}
{pt3dadd(184080.000000,145740.000000,85250.000000,555.715346)}
{pt3dadd(183936.000000,145728.000000,85125.000000,561.160988)}
{pt3dadd(183804.000000,145656.000000,84975.000000,532.138540)}
{pt3dadd(183684.000000,145644.000000,84825.000000,495.182346)}
{pt3dadd(183564.000000,145608.000000,84650.000000,476.791880)}
{pt3dadd(183432.000000,145560.000000,84450.000000,488.513632)}
{pt3dadd(183240.000000,145548.000000,84250.000000,477.881650)}
{pt3dadd(183084.000000,145560.000000,84025.000000,496.272116)}
{pt3dadd(183000.000000,145584.000000,83750.000000,517.656972)}
{pt3dadd(182844.000000,145512.000000,83550.000000,536.047438)}
{pt3dadd(182580.000000,145356.000000,83400.000000,504.050192)}
{pt3dadd(182484.000000,145224.000000,83225.000000,485.659726)}
{pt3dadd(182376.000000,145176.000000,82975.000000,459.335514)}
{pt3dadd(182196.000000,145068.000000,82800.000000,437.950658)}
{pt3dadd(182100.000000,144996.000000,82525.000000,419.560192)}
{pt3dadd(181896.000000,144996.000000,82325.000000,419.560192)}
{pt3dadd(181644.000000,144996.000000,81975.000000,428.307146)}
{pt3dadd(181404.000000,145032.000000,81725.000000,444.987846)}
{pt3dadd(181260.000000,145068.000000,81450.000000,461.668546)}
{pt3dadd(181212.000000,145020.000000,81250.000000,470.415500)}
{pt3dadd(180948.000000,144960.000000,81125.000000,470.415500)}
{pt3dadd(180912.000000,144924.000000,80925.000000,475.119656)}
{pt3dadd(180876.000000,144888.000000,80750.000000,479.823812)}
{pt3dadd(180720.000000,144828.000000,80550.000000,489.467324)}
{pt3dadd(180588.000000,144768.000000,80375.000000,494.171480)}
{pt3dadd(180504.000000,144672.000000,80200.000000,498.875636)}
{pt3dadd(180444.000000,144660.000000,80050.000000,498.875636)}
{pt3dadd(180336.000000,144636.000000,79875.000000,498.875636)}
{pt3dadd(180216.000000,144600.000000,79675.000000,493.936280)}
{pt3dadd(180108.000000,144564.000000,79525.000000,504.061976)}
{pt3dadd(180036.000000,144564.000000,79275.000000,519.633314)}
{pt3dadd(179904.000000,144516.000000,79100.000000,524.572670)}
{pt3dadd(179772.000000,144456.000000,78875.000000,529.512026)}
{pt3dadd(179712.000000,144444.000000,78725.000000,520.327724)}
{pt3dadd(179652.000000,144480.000000,78500.000000,505.497872)}
{pt3dadd(179616.000000,144468.000000,78325.000000,480.742232)}
{pt3dadd(179568.000000,144468.000000,78175.000000,485.928572)}
{pt3dadd(179376.000000,144528.000000,78000.000000,480.989216)}
{pt3dadd(179280.000000,144600.000000,77825.000000,490.173518)}
{pt3dadd(179256.000000,144588.000000,77650.000000,494.877674)}
{pt3dadd(179256.000000,144588.000000,77475.000000,490.610866)}
{pt3dadd(179280.000000,144648.000000,77300.000000,471.300868)}
{pt3dadd(179208.000000,144684.000000,77125.000000,457.849758)}
{pt3dadd(179160.000000,144732.000000,77000.000000,453.145602)}
{pt3dadd(179112.000000,144720.000000,76900.000000,439.694492)}
{pt3dadd(179100.000000,144852.000000,76750.000000,439.694492)}
{pt3dadd(179052.000000,144972.000000,76575.000000,439.694492)}
{pt3dadd(178980.000000,144960.000000,76325.000000,439.694492)}
{pt3dadd(178872.000000,145140.000000,76175.000000,430.947538)}
{pt3dadd(178812.000000,145260.000000,75975.000000,430.947538)}
{pt3dadd(178548.000000,145488.000000,75775.000000,439.694492)}
{pt3dadd(178404.000000,145476.000000,75625.000000,435.427684)}
{pt3dadd(178332.000000,145560.000000,75425.000000,435.427684)}
{pt3dadd(178344.000000,145872.000000,75125.000000,431.364054)}
{pt3dadd(178092.000000,145908.000000,74900.000000,431.364054)}
{pt3dadd(177876.000000,146028.000000,74675.000000,418.553470)}
{pt3dadd(177696.000000,146052.000000,74525.000000,418.553470)}
{pt3dadd(177600.000000,146088.000000,74375.000000,414.489840)}
{pt3dadd(177456.000000,146184.000000,74275.000000,410.619724)}
{pt3dadd(177408.000000,146304.000000,74150.000000,392.146682)}
{pt3dadd(177252.000000,146412.000000,73950.000000,392.146682)}
{pt3dadd(177132.000000,146484.000000,73825.000000,384.212936)}
{pt3dadd(177084.000000,146628.000000,73600.000000,388.276566)}
{pt3dadd(176976.000000,146652.000000,73425.000000,392.146682)}
{pt3dadd(176988.000000,146748.000000,73300.000000,410.619724)}
{pt3dadd(176904.000000,146844.000000,73125.000000,406.749608)}
{pt3dadd(176760.000000,146880.000000,72925.000000,410.619724)}
{pt3dadd(176544.000000,146988.000000,72775.000000,406.556094)}
{pt3dadd(176400.000000,147072.000000,72575.000000,410.619724)}
{pt3dadd(176292.000000,147108.000000,72325.000000,429.010190)}
{pt3dadd(176196.000000,147144.000000,72100.000000,445.690890)}
{pt3dadd(176100.000000,147300.000000,71975.000000,458.501474)}
{pt3dadd(176004.000000,147408.000000,71800.000000,462.565104)}
{pt3dadd(175860.000000,147528.000000,71675.000000,471.312058)}
{pt3dadd(175752.000000,147564.000000,71500.000000,457.188400)}
{pt3dadd(175656.000000,147504.000000,71350.000000,448.441446)}
{pt3dadd(175524.000000,147516.000000,71125.000000,439.694492)}
{pt3dadd(175392.000000,147564.000000,70900.000000,448.441446)}
{pt3dadd(175200.000000,147696.000000,70675.000000,439.694492)}
{pt3dadd(175020.000000,147852.000000,70425.000000,448.878794)}
{pt3dadd(174828.000000,147888.000000,70125.000000,448.878794)}
{pt3dadd(174768.000000,147960.000000,70000.000000,448.878794)}
{pt3dadd(174696.000000,147996.000000,69800.000000,440.131840)}
{pt3dadd(174576.000000,148044.000000,69725.000000,444.398648)}
{pt3dadd(174456.000000,148140.000000,69625.000000,430.947538)}
{pt3dadd(174360.000000,148140.000000,69475.000000,430.947538)}
{pt3dadd(174228.000000,148128.000000,69300.000000,454.524344)}
{pt3dadd(174072.000000,148200.000000,69175.000000,489.264718)}
{pt3dadd(173892.000000,148344.000000,69000.000000,508.574716)}
{pt3dadd(173724.000000,148308.000000,68875.000000,549.318916)}
{pt3dadd(173472.000000,148404.000000,68675.000000,596.367130)}
{pt3dadd(173280.000000,148452.000000,68575.000000,596.367130)}
{pt3dadd(173208.000000,148428.000000,68450.000000,608.674970)}
{pt3dadd(173064.000000,148452.000000,68300.000000,638.765606)}
{pt3dadd(172932.000000,148560.000000,68150.000000,611.472516)}
{pt3dadd(172740.000000,148560.000000,67950.000000,611.472516)}
{pt3dadd(172572.000000,148608.000000,67675.000000,622.636084)}
{pt3dadd(172332.000000,148716.000000,67550.000000,584.334824)}
{pt3dadd(172104.000000,148728.000000,67400.000000,544.118492)}
{pt3dadd(172032.000000,148764.000000,67250.000000,544.118492)}
{pt3dadd(171948.000000,148848.000000,67075.000000,515.460744)}
{pt3dadd(171768.000000,148956.000000,66875.000000,504.297176)}
{pt3dadd(171396.000000,148980.000000,66650.000000,524.572670)}
{pt3dadd(171336.000000,149112.000000,66500.000000,540.144008)}
{pt3dadd(171192.000000,149184.000000,66350.000000,550.269704)}
{pt3dadd(171012.000000,149196.000000,66200.000000,555.456044)}
{pt3dadd(170688.000000,149544.000000,66050.000000,527.815608)}
{pt3dadd(170544.000000,149616.000000,66000.000000,503.059968)}
{pt3dadd(170568.000000,149592.000000,65875.000000,469.973890)}
{pt3dadd(170388.000000,149592.000000,65800.000000,431.267194)}
{pt3dadd(170352.000000,149616.000000,65675.000000,386.033386)}
{pt3dadd(170340.000000,149664.000000,65575.000000,371.623974)}
{pt3dadd(170220.000000,149724.000000,65475.000000,334.410010)}
{pt3dadd(170076.000000,149748.000000,65375.000000,308.145934)}
{pt3dadd(169932.000000,149616.000000,65275.000000,295.698538)}
{pt3dadd(169944.000000,149664.000000,65175.000000,295.698538)}
{pt3dadd(169788.000000,149736.000000,65000.000000,292.514578)}
{pt3dadd(169752.000000,149772.000000,64875.000000,306.988692)}
{pt3dadd(169764.000000,149820.000000,64675.000000,322.186508)}
{pt3dadd(169776.000000,149904.000000,64600.000000,338.144220)}
{pt3dadd(169812.000000,149976.000000,64525.000000,341.328180)}
{pt3dadd(169788.000000,150036.000000,64425.000000,355.051436)}
{pt3dadd(169560.000000,150024.000000,64200.000000,365.590732)}
{pt3dadd(169536.000000,150180.000000,64050.000000,380.720622)}
{pt3dadd(169380.000000,150300.000000,63950.000000,392.340196)}
{pt3dadd(169356.000000,150288.000000,63675.000000,415.080046)}
{pt3dadd(169080.000000,150240.000000,63350.000000,415.080046)}
{pt3dadd(168828.000000,150372.000000,63175.000000,415.080046)}
{pt3dadd(168948.000000,150624.000000,63050.000000,407.146300)}
{pt3dadd(168840.000000,150672.000000,62925.000000,388.673258)}
{pt3dadd(168780.000000,150696.000000,62800.000000,380.342820)}
{pt3dadd(168756.000000,150756.000000,62625.000000,384.212936)}
{pt3dadd(168828.000000,150828.000000,62425.000000,388.083052)}
{pt3dadd(168744.000000,150864.000000,62300.000000,404.763752)}
{pt3dadd(168624.000000,150936.000000,62100.000000,427.503602)}
{pt3dadd(168504.000000,151020.000000,61950.000000,440.314186)}
{pt3dadd(168516.000000,151056.000000,61800.000000,444.377816)}
{pt3dadd(168540.000000,151140.000000,61625.000000,457.188400)}
{pt3dadd(168516.000000,151176.000000,61475.000000,457.188400)}
{pt3dadd(168408.000000,151236.000000,61300.000000,461.668546)}
{pt3dadd(168312.000000,151260.000000,61100.000000,476.498398)}
{pt3dadd(168204.000000,151380.000000,60850.000000,489.949508)}
{pt3dadd(168132.000000,151488.000000,60650.000000,494.653664)}
{pt3dadd(168084.000000,151500.000000,60450.000000,520.647084)}
{pt3dadd(168024.000000,151488.000000,60250.000000,530.290596)}
{pt3dadd(167880.000000,151476.000000,60075.000000,530.290596)}
{pt3dadd(167784.000000,151404.000000,59900.000000,521.106294)}
{pt3dadd(167676.000000,151356.000000,59675.000000,511.921992)}
{pt3dadd(167580.000000,151356.000000,59450.000000,477.181618)}
{pt3dadd(167496.000000,151392.000000,59250.000000,467.538106)}
{pt3dadd(167376.000000,151464.000000,59050.000000,457.412410)}
{pt3dadd(167256.000000,151512.000000,58900.000000,461.892556)}
{pt3dadd(167160.000000,151536.000000,58725.000000,471.076858)}
{pt3dadd(167064.000000,151584.000000,58575.000000,505.817232)}
{pt3dadd(166860.000000,151572.000000,58375.000000,510.521388)}
{pt3dadd(166728.000000,151620.000000,58100.000000,505.817232)}
{pt3dadd(166584.000000,151596.000000,57925.000000,489.136532)}
{pt3dadd(166476.000000,151560.000000,57750.000000,450.996076)}
{pt3dadd(166416.000000,151644.000000,57600.000000,397.782660)}
{pt3dadd(166428.000000,151788.000000,57425.000000,369.201660)}
{pt3dadd(166440.000000,151788.000000,57300.000000,345.324816)}
{pt3dadd(166320.000000,151800.000000,57050.000000,334.785520)}
{pt3dadd(166200.000000,151836.000000,56875.000000,347.855292)}
{pt3dadd(166080.000000,151872.000000,56675.000000,344.671332)}
{pt3dadd(165996.000000,151908.000000,56475.000000,351.867476)}
{pt3dadd(165888.000000,151956.000000,56275.000000,355.377792)}
{pt3dadd(165768.000000,151920.000000,56150.000000,358.720944)}
{pt3dadd(165684.000000,151956.000000,55975.000000,366.276888)}
{pt3dadd(165624.000000,151992.000000,55850.000000,372.804000)}
{pt3dadd(165552.000000,152040.000000,55750.000000,369.118172)}
{pt3dadd(165492.000000,152052.000000,55600.000000,385.004554)}
{pt3dadd(165420.000000,152184.000000,55450.000000,400.134444)}
{pt3dadd(165204.000000,152208.000000,55300.000000,389.068184)}
{pt3dadd(165180.000000,152292.000000,55150.000000,389.068184)}
{pt3dadd(165036.000000,152436.000000,55025.000000,389.068184)}
{pt3dadd(164892.000000,152436.000000,54875.000000,376.867630)}
{pt3dadd(164592.000000,152628.000000,54575.000000,405.890078)}
{pt3dadd(164568.000000,152652.000000,54575.000000,455.760342)}
{pt3dadd(164340.000000,152652.000000,54475.000000,499.912680)}
{pt3dadd(164244.000000,152652.000000,54350.000000,540.554702)}
{pt3dadd(164136.000000,152664.000000,54250.000000,572.065254)}
{pt3dadd(163980.000000,152748.000000,54150.000000,551.789760)}
{pt3dadd(163908.000000,152820.000000,54075.000000,535.439852)}
{pt3dadd(163896.000000,152832.000000,54075.000000,529.994210)}
{pt3dadd(163908.000000,152904.000000,53925.000000,519.362228)}
{pt3dadd(163860.000000,153000.000000,53825.000000,514.175888)}
{pt3dadd(163800.000000,153096.000000,53700.000000,540.169308)}
{pt3dadd(163728.000000,153180.000000,53625.000000,550.801290)}
{pt3dadd(163596.000000,153096.000000,53300.000000,561.964858)}
{pt3dadd(163320.000000,153108.000000,52975.000000,557.025502)}
{pt3dadd(163164.000000,153144.000000,52775.000000,555.370617)}
{pt3dadd(163140.000000,153204.000000,52475.000000,493.936280)}

{create adhoc25}
{access adhoc25}
{connect adhoc25(1), adhoc24(0)}
{nseg = 1}
{strdef color color = "White"}
{pt3dclear()}
{pt3dadd(163140.000000,153204.000000,52475.000000,493.936280)}
{pt3dadd(163128.000000,153792.000000,52475.000000,432.889100)}
{pt3dadd(163212.000000,154032.000000,52475.000000,416.199518)}
{pt3dadd(163188.000000,154248.000000,52125.000000,378.059062)}
{pt3dadd(163020.000000,154416.000000,52000.000000,361.854763)}
{pt3dadd(163032.000000,154656.000000,51850.000000,303.234000)}

{create adhoc26}
{access adhoc26}
{connect adhoc26(1), adhoc25(0)}
{nseg = 1}
{strdef color color = "White"}
{pt3dclear()}
{pt3dadd(163032.000000,154656.000000,51850.000000,303.234000)}
{pt3dadd(163092.000000,154848.000000,51675.000000,256.069377)}
{pt3dadd(163080.000000,154968.000000,51650.000000,258.918846)}
{pt3dadd(163140.000000,155112.000000,51600.000000,243.527626)}
{pt3dadd(163008.000000,155292.000000,51550.000000,241.151712)}
{pt3dadd(163020.000000,155448.000000,51550.000000,235.283040)}
{pt3dadd(162960.000000,155580.000000,51475.000000,218.395440)}
{pt3dadd(163092.000000,155736.000000,51375.000000,191.267340)}
{pt3dadd(163164.000000,155868.000000,51300.000000,173.794760)}
{pt3dadd(163320.000000,156036.000000,51300.000000,160.046810)}
{pt3dadd(163332.000000,156204.000000,51350.000000,160.046810)}
{pt3dadd(163260.000000,156348.000000,51250.000000,160.046810)}
{pt3dadd(163236.000000,156516.000000,51225.000000,158.588200)}
{pt3dadd(163284.000000,156660.000000,51275.000000,161.435960)}
{pt3dadd(163332.000000,156816.000000,51300.000000,155.448550)}
{pt3dadd(163392.000000,156948.000000,51375.000000,147.388820)}
{pt3dadd(163344.000000,157104.000000,51325.000000,152.216990)}
{pt3dadd(163332.000000,157260.000000,51300.000000,158.503770)}
{pt3dadd(163416.000000,157380.000000,51325.000000,175.391370)}
{pt3dadd(163392.000000,157512.000000,51275.000000,192.863950)}
{pt3dadd(163380.000000,157644.000000,51275.000000,206.792352)}
{pt3dadd(163368.000000,157788.000000,51225.000000,226.341862)}
{pt3dadd(163380.000000,157944.000000,51200.000000,240.777206)}
{pt3dadd(163344.000000,158112.000000,51100.000000,248.267286)}
{pt3dadd(163308.000000,158328.000000,50950.000000,248.267286)}
{pt3dadd(163332.000000,158484.000000,50900.000000,252.685094)}
{pt3dadd(163248.000000,158616.000000,50775.000000,245.195014)}
{pt3dadd(163356.000000,158904.000000,50900.000000,247.689730)}
{pt3dadd(163296.000000,159120.000000,50925.000000,240.199650)}
{pt3dadd(163380.000000,159276.000000,50950.000000,249.952510)}
{pt3dadd(163380.000000,159492.000000,50950.000000,260.193010)}
{pt3dadd(163392.000000,159660.000000,51025.000000,279.537754)}
{pt3dadd(163368.000000,159828.000000,51100.000000,284.907624)}
{pt3dadd(163488.000000,160008.000000,51175.000000,292.397704)}
{pt3dadd(163404.000000,160164.000000,51150.000000,276.482736)}
{pt3dadd(163500.000000,160344.000000,51300.000000,257.817348)}
{pt3dadd(163512.000000,160524.000000,51375.000000,223.116540)}
{pt3dadd(163512.000000,160692.000000,51450.000000,195.988440)}
{pt3dadd(163500.000000,160848.000000,51500.000000,168.763000)}
{pt3dadd(163404.000000,161028.000000,51525.000000,168.763000)}
{pt3dadd(163476.000000,161196.000000,51675.000000,165.128458)}
{pt3dadd(163500.000000,161436.000000,51750.000000,168.425092)}
{pt3dadd(163536.000000,161628.000000,51800.000000,183.049912)}
{pt3dadd(163464.000000,161748.000000,51800.000000,198.367464)}
{pt3dadd(163392.000000,161892.000000,51800.000000,200.322136)}
{pt3dadd(163248.000000,162060.000000,51775.000000,217.252196)}
{pt3dadd(163176.000000,162264.000000,51800.000000,229.311626)}
{pt3dadd(163068.000000,162636.000000,51800.000000,231.574406)}
{pt3dadd(162936.000000,163068.000000,51800.000000,238.368128)}
{pt3dadd(162780.000000,163536.000000,51800.000000,257.966784)}
{pt3dadd(162456.000000,163740.000000,51800.000000,266.224594)}
{pt3dadd(162468.000000,163920.000000,51775.000000,285.569338)}
{pt3dadd(162432.000000,164160.000000,51775.000000,304.914082)}
{pt3dadd(162324.000000,164340.000000,51800.000000,315.666608)}
{pt3dadd(162336.000000,164568.000000,51825.000000,312.778668)}
{pt3dadd(162276.000000,164784.000000,51825.000000,309.890728)}
{pt3dadd(162204.000000,164904.000000,51825.000000,292.921898)}
{pt3dadd(162096.000000,165144.000000,51700.000000,275.953068)}
{pt3dadd(162144.000000,165324.000000,51700.000000,262.824628)}
{pt3dadd(162060.000000,165516.000000,51675.000000,248.166320)}
{pt3dadd(162120.000000,165792.000000,51700.000000,227.639340)}
{pt3dadd(162036.000000,166080.000000,51650.000000,213.203996)}
{pt3dadd(161964.000000,166164.000000,51625.000000,200.541602)}
{pt3dadd(161964.000000,166344.000000,51625.000000,192.116714)}
{pt3dadd(161928.000000,166524.000000,51625.000000,190.064306)}
{pt3dadd(161940.000000,166680.000000,51675.000000,200.350786)}
{pt3dadd(161952.000000,166860.000000,51675.000000,212.410216)}
{pt3dadd(162024.000000,167028.000000,51675.000000,225.072610)}
{pt3dadd(162024.000000,167220.000000,51675.000000,233.497498)}
{pt3dadd(161940.000000,167364.000000,51675.000000,237.704934)}
{pt3dadd(161892.000000,167508.000000,51700.000000,237.704934)}
{pt3dadd(161844.000000,167664.000000,51725.000000,235.442154)}
{pt3dadd(161820.000000,167808.000000,51800.000000,230.803460)}
{pt3dadd(161808.000000,167904.000000,51825.000000,235.674090)}
{pt3dadd(161784.000000,168036.000000,51800.000000,237.936870)}
{pt3dadd(161784.000000,168192.000000,51775.000000,245.426950)}
{pt3dadd(161652.000000,168408.000000,51700.000000,255.179810)}
{pt3dadd(161616.000000,168624.000000,51700.000000,259.818504)}
{pt3dadd(161592.000000,168828.000000,51675.000000,246.522986)}
{pt3dadd(161580.000000,168996.000000,51675.000000,246.522986)}
{pt3dadd(161520.000000,169152.000000,51625.000000,246.522986)}
{pt3dadd(161472.000000,169296.000000,51600.000000,230.608018)}
{pt3dadd(161424.000000,169440.000000,51550.000000,223.814296)}
{pt3dadd(161340.000000,169632.000000,51450.000000,229.976404)}
{pt3dadd(161256.000000,169776.000000,51400.000000,221.551516)}
{pt3dadd(161184.000000,169944.000000,51375.000000,205.636548)}
{pt3dadd(161136.000000,170088.000000,51400.000000,211.798656)}
{pt3dadd(161124.000000,170244.000000,51425.000000,202.468514)}
{pt3dadd(161064.000000,170376.000000,51425.000000,200.313486)}
{pt3dadd(161028.000000,170532.000000,51400.000000,198.451894)}
{pt3dadd(160860.000000,170712.000000,51475.000000,187.141422)}
{pt3dadd(160908.000000,170868.000000,51375.000000,177.344772)}
{pt3dadd(160896.000000,170988.000000,51350.000000,186.674914)}
{pt3dadd(160848.000000,171156.000000,51300.000000,193.468636)}
{pt3dadd(160764.000000,171312.000000,51275.000000,206.131030)}
{pt3dadd(160692.000000,171252.000000,51225.000000,212.118440)}
{pt3dadd(160572.000000,171348.000000,51125.000000,213.891390)}
{pt3dadd(160464.000000,171492.000000,51000.000000,198.573838)}
{pt3dadd(160356.000000,171648.000000,51100.000000,185.911444)}
{pt3dadd(160260.000000,171828.000000,51050.000000,168.179466)}
{pt3dadd(160212.000000,171996.000000,51225.000000,160.869056)}
{pt3dadd(160128.000000,172164.000000,51050.000000,159.096106)}
{pt3dadd(159912.000000,172356.000000,51050.000000,170.406578)}
{pt3dadd(159744.000000,172500.000000,51050.000000,163.805458)}
{pt3dadd(159924.000000,172800.000000,50975.000000,165.413572)}
{pt3dadd(160092.000000,172956.000000,51100.000000,164.153572)}
{pt3dadd(160176.000000,173136.000000,51025.000000,155.154642)}
{pt3dadd(160284.000000,173352.000000,51025.000000,143.844170)}
{pt3dadd(160368.000000,173544.000000,51075.000000,139.673410)}
{pt3dadd(160620.000000,173724.000000,51075.000000,133.686000)}
{pt3dadd(160776.000000,173916.000000,50950.000000,140.648296)}
{pt3dadd(160740.000000,174108.000000,50875.000000,166.577286)}
{pt3dadd(160692.000000,174264.000000,50850.000000,191.183276)}
{pt3dadd(160620.000000,174444.000000,50725.000000,222.482136)}
{pt3dadd(160392.000000,174648.000000,50600.000000,247.088126)}
{pt3dadd(160080.000000,174804.000000,50400.000000,262.444190)}
{pt3dadd(159852.000000,174960.000000,50275.000000,259.949474)}
{pt3dadd(159768.000000,175128.000000,50225.000000,252.816064)}
{pt3dadd(159528.000000,175296.000000,50150.000000,242.575564)}
{pt3dadd(159420.000000,175452.000000,50075.000000,227.418454)}
{pt3dadd(159168.000000,175704.000000,50075.000000,218.993566)}
{pt3dadd(158856.000000,175848.000000,50100.000000,212.199844)}
{pt3dadd(158628.000000,176112.000000,50125.000000,199.106560)}
{pt3dadd(158412.000000,176292.000000,50100.000000,183.750496)}
{pt3dadd(158304.000000,176448.000000,50100.000000,181.977546)}
{pt3dadd(158196.000000,176592.000000,50125.000000,178.343004)}
{pt3dadd(158076.000000,176712.000000,50075.000000,170.701382)}
{pt3dadd(157920.000000,176904.000000,50075.000000,205.402190)}
{pt3dadd(157836.000000,177084.000000,50050.000000,223.134168)}
{pt3dadd(157692.000000,177324.000000,50125.000000,228.723382)}
{pt3dadd(157440.000000,177552.000000,50075.000000,234.312596)}
{pt3dadd(157356.000000,177708.000000,50100.000000,241.954218)}
{pt3dadd(157176.000000,177900.000000,50075.000000,230.099554)}
{pt3dadd(157128.000000,178080.000000,50050.000000,227.723640)}
{pt3dadd(156960.000000,178236.000000,50025.000000,236.569770)}
{pt3dadd(156876.000000,178452.000000,49950.000000,245.415900)}
{pt3dadd(156684.000000,178620.000000,49825.000000,257.323788)}
{pt3dadd(156432.000000,178824.000000,49650.000000,252.209622)}
{pt3dadd(156240.000000,178968.000000,49575.000000,259.699702)}
{pt3dadd(156012.000000,179136.000000,49425.000000,264.813868)}
{pt3dadd(155808.000000,179256.000000,49275.000000,285.125850)}
{pt3dadd(155700.000000,179436.000000,49225.000000,287.876270)}
{pt3dadd(155496.000000,179592.000000,49175.000000,298.628796)}
{pt3dadd(155340.000000,179748.000000,49000.000000,310.483460)}
{pt3dadd(155184.000000,179892.000000,48825.000000,313.233880)}
{pt3dadd(155076.000000,180060.000000,48750.000000,303.674424)}
{pt3dadd(154992.000000,180276.000000,48700.000000,298.304554)}
{pt3dadd(154908.000000,180480.000000,48550.000000,301.336898)}
{pt3dadd(154752.000000,180684.000000,48375.000000,289.482234)}
{pt3dadd(154596.000000,180888.000000,48075.000000,305.439946)}
{pt3dadd(154632.000000,181080.000000,48050.000000,308.472290)}
{pt3dadd(154512.000000,181236.000000,47950.000000,322.946404)}
{pt3dadd(154452.000000,181488.000000,47775.000000,317.026120)}
{pt3dadd(154332.000000,181632.000000,47575.000000,328.880784)}
{pt3dadd(154248.000000,181788.000000,47450.000000,318.843356)}
{pt3dadd(154116.000000,182004.000000,47300.000000,325.370468)}
{pt3dadd(154008.000000,182244.000000,47225.000000,348.110318)}
{pt3dadd(153840.000000,182436.000000,47050.000000,375.687604)}
{pt3dadd(153732.000000,182628.000000,46950.000000,379.030756)}
{pt3dadd(153600.000000,182856.000000,46850.000000,400.687758)}
{pt3dadd(153528.000000,183072.000000,46775.000000,394.160646)}
{pt3dadd(153408.000000,183444.000000,46900.000000,362.316552)}
{pt3dadd(153300.000000,183660.000000,46975.000000,326.874680)}
{pt3dadd(153384.000000,183876.000000,46850.000000,320.347568)}
{pt3dadd(153468.000000,184128.000000,46725.000000,295.658222)}
{pt3dadd(153504.000000,184344.000000,46600.000000,298.842182)}
{pt3dadd(153528.000000,184536.000000,46425.000000,311.289578)}
{pt3dadd(153552.000000,184800.000000,46425.000000,316.403744)}
{pt3dadd(153552.000000,185196.000000,46250.000000,295.825152)}
{pt3dadd(153492.000000,185688.000000,46150.000000,278.278904)}
{pt3dadd(153444.000000,186168.000000,45925.000000,256.671380)}
{pt3dadd(153312.000000,186564.000000,45775.000000,217.095884)}
{pt3dadd(153276.000000,186948.000000,45525.000000,183.856152)}
{pt3dadd(153240.000000,187356.000000,45475.000000,163.612742)}
{pt3dadd(153204.000000,187788.000000,45475.000000,149.684340)}
{pt3dadd(153144.000000,188028.000000,45450.000000,154.323034)}
{pt3dadd(153108.000000,188268.000000,45550.000000,190.555378)}
{pt3dadd(153036.000000,188604.000000,45775.000000,238.992926)}
{pt3dadd(152832.000000,188844.000000,45900.000000,276.782584)}
{pt3dadd(152844.000000,189192.000000,45975.000000,302.618874)}
{pt3dadd(152892.000000,189480.000000,45900.000000,297.980180)}
{pt3dadd(153012.000000,189660.000000,45700.000000,281.011350)}
{pt3dadd(152988.000000,189888.000000,45675.000000,248.036974)}
{pt3dadd(153048.000000,190116.000000,45525.000000,237.284448)}
{pt3dadd(153168.000000,190296.000000,45475.000000,227.531588)}
{pt3dadd(153276.000000,190512.000000,45375.000000,216.046418)}
{pt3dadd(153372.000000,190752.000000,45275.000000,209.252696)}
{pt3dadd(153456.000000,190992.000000,45225.000000,215.121368)}
{pt3dadd(153588.000000,191196.000000,44975.000000,212.745454)}
{pt3dadd(153612.000000,191328.000000,44900.000000,222.498314)}
{pt3dadd(153624.000000,191592.000000,44750.000000,241.116894)}
{pt3dadd(153540.000000,191652.000000,44600.000000,253.024782)}
{pt3dadd(153480.000000,191952.000000,44650.000000,267.683090)}
{pt3dadd(153444.000000,192288.000000,44550.000000,257.396610)}
{pt3dadd(153456.000000,192816.000000,44550.000000,245.488722)}
{pt3dadd(153636.000000,193092.000000,44425.000000,242.994006)}
{pt3dadd(153588.000000,193308.000000,44425.000000,258.191822)}
{pt3dadd(153600.000000,193536.000000,44375.000000,274.149534)}
{pt3dadd(153516.000000,193752.000000,44325.000000,310.634226)}
{pt3dadd(153468.000000,194004.000000,44350.000000,348.806190)}
{pt3dadd(153516.000000,194280.000000,44300.000000,380.184432)}
{pt3dadd(153420.000000,194556.000000,44275.000000,387.380576)}
{pt3dadd(153312.000000,194676.000000,44375.000000,356.764556)}
{pt3dadd(153408.000000,194676.000000,44050.000000,315.210280)}
{pt3dadd(153480.000000,195012.000000,43900.000000,267.708174)}
{pt3dadd(153756.000000,195600.000000,43925.000000,215.607808)}
{pt3dadd(153876.000000,195984.000000,43950.000000,163.405408)}
{pt3dadd(154068.000000,196356.000000,43975.000000,149.477006)}
{pt3dadd(154260.000000,196728.000000,44000.000000,160.415262)}
{pt3dadd(154416.000000,196896.000000,44225.000000,167.692996)}
{pt3dadd(154500.000000,197016.000000,44225.000000,173.979776)}
{pt3dadd(154620.000000,197124.000000,44225.000000,184.238706)}
{pt3dadd(154656.000000,197196.000000,44250.000000,196.114700)}
{pt3dadd(154728.000000,197304.000000,44275.000000,178.214148)}
{pt3dadd(154740.000000,197400.000000,44300.000000,164.949004)}
{pt3dadd(154800.000000,197556.000000,44375.000000,155.950074)}
{pt3dadd(154800.000000,197664.000000,44375.000000,151.121904)}
{pt3dadd(154848.000000,197928.000000,44400.000000,134.073760)}
{pt3dadd(154884.000000,198168.000000,44400.000000,132.873760)}
{pt3dadd(154920.000000,198348.000000,44400.000000,129.090760)}
{pt3dadd(154896.000000,198588.000000,44400.000000,126.630760)}
{pt3dadd(154908.000000,198768.000000,44325.000000,121.200000)}
{pt3dadd(154908.000000,198924.000000,44200.000000,121.200000)}
{pt3dadd(154800.000000,199068.000000,44200.000000,121.200000)}
{pt3dadd(154728.000000,199212.000000,44200.000000,121.200000)}
{pt3dadd(154704.000000,199332.000000,44200.000000,121.200000)}
{pt3dadd(154656.000000,199416.000000,44200.000000,120.000000)}
{pt3dadd(154548.000000,199512.000000,44200.000000,120.000000)}
{pt3dadd(154512.000000,199632.000000,44200.000000,120.000000)}
{pt3dadd(154452.000000,199752.000000,44200.000000,128.162296)}
{pt3dadd(154380.000000,199932.000000,44200.000000,137.932706)}
{pt3dadd(154260.000000,200052.000000,44200.000000,149.391636)}
{pt3dadd(154212.000000,200292.000000,44300.000000,162.623516)}
{pt3dadd(154080.000000,200580.000000,44375.000000,181.724068)}
{pt3dadd(154188.000000,200808.000000,44425.000000,183.332182)}
{pt3dadd(154188.000000,201084.000000,44525.000000,181.724068)}
{pt3dadd(154032.000000,201336.000000,44625.000000,181.724068)}
{pt3dadd(153876.000000,201516.000000,44725.000000,178.262598)}
{pt3dadd(153804.000000,201768.000000,44875.000000,162.945046)}
{pt3dadd(153804.000000,201924.000000,45000.000000,155.634636)}
{pt3dadd(153768.000000,202044.000000,45125.000000,155.634636)}
{pt3dadd(153756.000000,202164.000000,45250.000000,147.958706)}
{pt3dadd(153684.000000,202272.000000,45375.000000,140.648296)}
{pt3dadd(153540.000000,202344.000000,45500.000000,139.325296)}
{pt3dadd(153468.000000,202416.000000,45575.000000,134.634004)}
{pt3dadd(153420.000000,202560.000000,45700.000000,124.240416)}
{pt3dadd(153204.000000,202740.000000,45750.000000,118.226124)}
{pt3dadd(153096.000000,202980.000000,45850.000000,114.623266)}
{pt3dadd(152808.000000,203196.000000,46075.000000,107.908126)}
{pt3dadd(152748.000000,203424.000000,46275.000000,104.944046)}
{pt3dadd(152784.000000,203652.000000,46400.000000,101.084507)}
{pt3dadd(152580.000000,203868.000000,46450.000000,101.084507)}
{pt3dadd(152616.000000,204072.000000,46950.000000,98.959468)}
{pt3dadd(152592.000000,204312.000000,47275.000000,98.959468)}
{pt3dadd(152520.000000,204528.000000,47300.000000,98.959468)}
{pt3dadd(152532.000000,204756.000000,47550.000000,100.795159)}
{pt3dadd(152448.000000,204948.000000,47525.000000,98.771311)}
{pt3dadd(152544.000000,205128.000000,47700.000000,97.784068)}
{pt3dadd(152532.000000,205320.000000,47825.000000,98.771311)}
{pt3dadd(152436.000000,205512.000000,47800.000000,100.698786)}
{pt3dadd(152328.000000,205728.000000,47800.000000,99.758554)}
{pt3dadd(152268.000000,205932.000000,47950.000000,98.818322)}
{pt3dadd(152292.000000,206172.000000,48000.000000,98.818322)}
{pt3dadd(152124.000000,206508.000000,47900.000000,99.854927)}
{pt3dadd(152016.000000,206904.000000,47975.000000,114.581754)}
{pt3dadd(151896.000000,207336.000000,48050.000000,123.560126)}
{pt3dadd(152148.000000,207972.000000,47875.000000,136.917794)}
{pt3dadd(152340.000000,208392.000000,47950.000000,158.221078)}
{pt3dadd(152628.000000,208824.000000,47900.000000,170.222780)}
{pt3dadd(152892.000000,209244.000000,47875.000000,182.282210)}
{pt3dadd(152772.000000,209592.000000,47775.000000,188.269620)}
{pt3dadd(152880.000000,209964.000000,47925.000000,195.200796)}
{pt3dadd(152952.000000,210372.000000,48100.000000,191.384532)}
{pt3dadd(153012.000000,210756.000000,48250.000000,185.397122)}
{pt3dadd(153324.000000,211140.000000,48150.000000,170.041058)}
{pt3dadd(153336.000000,211524.000000,48225.000000,161.961960)}
{pt3dadd(153468.000000,211908.000000,48450.000000,160.811480)}

{create adhoc27}
{access adhoc27}
{connect adhoc27(1), adhoc25(0)}
{nseg = 1}
{strdef color color = "White"}
{pt3dclear()}
{pt3dadd(163032.000000,154656.000000,51850.000000,303.234000)}
{pt3dadd(162840.000000,154596.000000,51575.000000,289.023500)}
{pt3dadd(162588.000000,154584.000000,51375.000000,223.814100)}
{pt3dadd(162384.000000,154740.000000,51175.000000,190.950300)}
{pt3dadd(162504.000000,154584.000000,51025.000000,165.114010)}
{pt3dadd(162636.000000,154644.000000,50850.000000,136.527300)}
{pt3dadd(162624.000000,154668.000000,50675.000000,140.499450)}
{pt3dadd(162600.000000,154680.000000,50475.000000,143.082450)}
{pt3dadd(162744.000000,154668.000000,50275.000000,143.082450)}
{pt3dadd(162804.000000,154680.000000,50075.000000,141.693300)}
{pt3dadd(162852.000000,154752.000000,49900.000000,146.291560)}
{pt3dadd(162900.000000,154836.000000,49700.000000,150.889820)}
{pt3dadd(163152.000000,155316.000000,49475.000000,158.565750)}
{pt3dadd(163152.000000,155388.000000,49375.000000,169.876222)}
{pt3dadd(163296.000000,155544.000000,49350.000000,185.193774)}
{pt3dadd(163428.000000,155628.000000,49500.000000,182.054124)}
{pt3dadd(163380.000000,155772.000000,49450.000000,189.331858)}
{pt3dadd(163464.000000,155952.000000,49450.000000,192.966400)}
{pt3dadd(163356.000000,156108.000000,49400.000000,187.643338)}
{pt3dadd(163272.000000,156396.000000,49400.000000,176.705082)}
{pt3dadd(163176.000000,156792.000000,49400.000000,187.122466)}
{pt3dadd(163308.000000,157008.000000,49325.000000,187.122466)}
{pt3dadd(163296.000000,157236.000000,49200.000000,193.284574)}
{pt3dadd(163176.000000,157452.000000,49075.000000,194.973094)}
{pt3dadd(163164.000000,157632.000000,48875.000000,201.904270)}
{pt3dadd(163272.000000,157920.000000,48750.000000,199.949598)}
{pt3dadd(163356.000000,158208.000000,48625.000000,191.063750)}
{pt3dadd(163452.000000,158304.000000,48450.000000,184.901642)}
{pt3dadd(163620.000000,158436.000000,48325.000000,190.490856)}
{pt3dadd(163704.000000,158532.000000,48175.000000,198.915744)}
{pt3dadd(163596.000000,158556.000000,48050.000000,202.922824)}
{pt3dadd(163680.000000,158628.000000,47875.000000,216.016108)}
{pt3dadd(163680.000000,158724.000000,47675.000000,220.023188)}
{pt3dadd(163608.000000,158760.000000,47475.000000,226.493404)}
{pt3dadd(163620.000000,158844.000000,47225.000000,218.068516)}
{pt3dadd(163692.000000,158892.000000,46975.000000,210.426894)}
{pt3dadd(163752.000000,159024.000000,46750.000000,197.333610)}
{pt3dadd(163908.000000,159216.000000,46550.000000,184.863818)}
{pt3dadd(164016.000000,159420.000000,46350.000000,171.115868)}
{pt3dadd(164028.000000,159540.000000,46150.000000,169.254276)}
{pt3dadd(164124.000000,159696.000000,45950.000000,169.254276)}
{pt3dadd(164388.000000,159876.000000,45775.000000,167.722740)}
{pt3dadd(164520.000000,160044.000000,45625.000000,169.254276)}
{pt3dadd(164616.000000,160200.000000,45450.000000,164.656016)}
{pt3dadd(164712.000000,160284.000000,45325.000000,152.624136)}
{pt3dadd(164772.000000,160368.000000,45150.000000,141.165206)}
{pt3dadd(164880.000000,160404.000000,45000.000000,134.534446)}
{pt3dadd(165072.000000,160476.000000,44925.000000,131.544300)}
{pt3dadd(165384.000000,160572.000000,44800.000000,126.372150)}
{pt3dadd(165684.000000,160704.000000,44750.000000,125.172150)}
{pt3dadd(165864.000000,160800.000000,44650.000000,126.372150)}
{pt3dadd(166248.000000,161136.000000,44500.000000,128.832150)}
{pt3dadd(166320.000000,161292.000000,44300.000000,136.891880)}
{pt3dadd(166440.000000,161448.000000,44175.000000,151.985352)}
{pt3dadd(166632.000000,161604.000000,44100.000000,161.755762)}
{pt3dadd(166656.000000,161928.000000,43950.000000,175.649234)}
{pt3dadd(166764.000000,162300.000000,43800.000000,181.351530)}
{pt3dadd(166908.000000,162516.000000,43725.000000,174.750410)}
{pt3dadd(167124.000000,162840.000000,43650.000000,164.829088)}
{pt3dadd(167100.000000,162900.000000,43525.000000,163.220974)}
{pt3dadd(167196.000000,163176.000000,43375.000000,159.586432)}
{pt3dadd(167304.000000,163392.000000,43200.000000,166.517608)}
{pt3dadd(167484.000000,163608.000000,43050.000000,169.657258)}
{pt3dadd(167616.000000,163836.000000,42900.000000,183.585660)}
{pt3dadd(167724.000000,164004.000000,42725.000000,186.882294)}
{pt3dadd(167772.000000,164244.000000,42575.000000,188.655244)}
{pt3dadd(167880.000000,164520.000000,42350.000000,190.609916)}
{pt3dadd(167928.000000,164808.000000,42200.000000,204.357866)}
{pt3dadd(167892.000000,164952.000000,42050.000000,202.305458)}
{pt3dadd(167892.000000,165060.000000,41900.000000,200.616938)}
{pt3dadd(167988.000000,165384.000000,41725.000000,194.015818)}
{pt3dadd(168024.000000,165612.000000,41525.000000,183.598434)}
{pt3dadd(168060.000000,165840.000000,41350.000000,165.252224)}
{pt3dadd(168156.000000,166248.000000,41150.000000,147.061222)}
{pt3dadd(168216.000000,166548.000000,41000.000000,137.290812)}
{pt3dadd(168276.000000,166872.000000,40850.000000,130.660052)}
{pt3dadd(168384.000000,167028.000000,40675.000000,124.029292)}
{pt3dadd(168300.000000,167196.000000,40550.000000,124.029292)}
{pt3dadd(168348.000000,167268.000000,40375.000000,130.344300)}
{pt3dadd(168384.000000,167364.000000,40150.000000,143.576180)}
{pt3dadd(168372.000000,167448.000000,39950.000000,153.346590)}
{pt3dadd(168348.000000,167616.000000,39725.000000,166.578470)}
{pt3dadd(168324.000000,167664.000000,39550.000000,171.176730)}
{pt3dadd(168444.000000,167712.000000,39400.000000,175.774990)}
{pt3dadd(168420.000000,167784.000000,39250.000000,175.774990)}
{pt3dadd(168408.000000,167856.000000,39075.000000,174.166876)}
{pt3dadd(168396.000000,167916.000000,38825.000000,176.028468)}
{pt3dadd(168324.000000,168048.000000,38650.000000,179.489938)}
{pt3dadd(168216.000000,168204.000000,38425.000000,181.178458)}
{pt3dadd(168048.000000,168300.000000,38175.000000,174.577338)}
{pt3dadd(167880.000000,168480.000000,37975.000000,171.587192)}
{pt3dadd(167748.000000,168636.000000,37850.000000,156.493720)}
{pt3dadd(167832.000000,168552.000000,37725.000000,143.261840)}
{pt3dadd(167772.000000,168672.000000,37550.000000,131.802910)}
{pt3dadd(167676.000000,168780.000000,37375.000000,128.955150)}
{pt3dadd(167568.000000,168900.000000,37225.000000,123.783000)}
{pt3dadd(167424.000000,168936.000000,37100.000000,137.014880)}
{pt3dadd(167328.000000,168960.000000,36975.000000,152.108352)}
{pt3dadd(167136.000000,169008.000000,36825.000000,167.201824)}
{pt3dadd(167016.000000,169056.000000,36675.000000,176.650704)}
{pt3dadd(166908.000000,169044.000000,36525.000000,183.281464)}
{pt3dadd(166740.000000,169008.000000,36375.000000,181.508514)}
{pt3dadd(166692.000000,169008.000000,36250.000000,171.587192)}
{pt3dadd(166620.000000,169044.000000,36075.000000,160.276720)}
{pt3dadd(166620.000000,169068.000000,35925.000000,147.044840)}
{pt3dadd(166632.000000,169092.000000,35750.000000,140.414080)}
{pt3dadd(166644.000000,169056.000000,35575.000000,128.955150)}
{pt3dadd(166584.000000,169116.000000,35400.000000,123.783000)}
{pt3dadd(166560.000000,169308.000000,35225.000000,120.000000)}
{pt3dadd(166524.000000,169368.000000,35050.000000,120.000000)}
{pt3dadd(166452.000000,169368.000000,34875.000000,120.000000)}
{pt3dadd(166404.000000,169392.000000,34900.000000,120.000000)}
{pt3dadd(166416.000000,169416.000000,34550.000000,120.000000)}
{pt3dadd(166428.000000,169548.000000,34400.000000,120.000000)}
{pt3dadd(166428.000000,169644.000000,34225.000000,120.000000)}
{pt3dadd(166488.000000,169968.000000,34050.000000,120.000000)}
{pt3dadd(166584.000000,170304.000000,33875.000000,120.000000)}
{pt3dadd(166740.000000,170628.000000,33750.000000,126.630760)}
{pt3dadd(166860.000000,170856.000000,33650.000000,136.401170)}
{pt3dadd(166968.000000,171096.000000,33500.000000,147.860100)}
{pt3dadd(167052.000000,171432.000000,33425.000000,166.960652)}
{pt3dadd(167196.000000,171792.000000,33250.000000,180.192532)}
{pt3dadd(167328.000000,172020.000000,33250.000000,185.020702)}
{pt3dadd(167652.000000,172368.000000,33125.000000,186.709222)}
{pt3dadd(167952.000000,172668.000000,33125.000000,180.422442)}
{pt3dadd(168120.000000,172800.000000,33125.000000,165.104890)}
{pt3dadd(168324.000000,172980.000000,33125.000000,158.503770)}
{pt3dadd(168600.000000,173256.000000,33125.000000,152.216990)}
{pt3dadd(168744.000000,173496.000000,33125.000000,153.989940)}
{pt3dadd(168924.000000,173544.000000,33225.000000,152.600790)}
{pt3dadd(169128.000000,173712.000000,33325.000000,155.448550)}
{pt3dadd(169200.000000,173952.000000,33325.000000,158.588200)}
{pt3dadd(169344.000000,174120.000000,33400.000000,170.464194)}
{pt3dadd(169500.000000,174324.000000,33325.000000,161.015314)}
{pt3dadd(169548.000000,174516.000000,33300.000000,178.487894)}
{pt3dadd(169632.000000,174780.000000,33225.000000,200.246124)}
{pt3dadd(169440.000000,175032.000000,33100.000000,213.994074)}
{pt3dadd(169368.000000,175176.000000,33000.000000,218.201510)}
{pt3dadd(169428.000000,175332.000000,32875.000000,218.201510)}
{pt3dadd(169392.000000,175644.000000,32750.000000,196.945930)}
{pt3dadd(169380.000000,175824.000000,32600.000000,173.729090)}
{pt3dadd(169356.000000,176016.000000,32475.000000,159.981140)}
{pt3dadd(169284.000000,176064.000000,32350.000000,143.897710)}
{pt3dadd(169308.000000,176160.000000,32275.000000,143.897710)}
{pt3dadd(169128.000000,176220.000000,32125.000000,143.897710)}
{pt3dadd(169068.000000,176340.000000,32025.000000,138.725560)}
{pt3dadd(169008.000000,176556.000000,31950.000000,122.011502)}
{pt3dadd(168984.000000,176592.000000,31825.000000,108.427253)}
{pt3dadd(168936.000000,176712.000000,31700.000000,85.281760)}

{create adhoc28}
{access adhoc28}
{connect adhoc28(1), adhoc24(0)}
{nseg = 1}
{strdef color color = "White"}
{pt3dclear()}
{pt3dadd(163140.000000,153204.000000,52475.000000,493.936280)}
{pt3dadd(163068.000000,152904.000000,52475.000000,500.227153)}
{pt3dadd(163128.000000,152544.000000,52475.000000,424.462236)}
{pt3dadd(163188.000000,152316.000000,52325.000000,370.930560)}
{pt3dadd(163020.000000,152196.000000,52225.000000,296.109620)}
{pt3dadd(163116.000000,152040.000000,52100.000000,260.092684)}
{pt3dadd(163140.000000,152004.000000,51975.000000,244.701464)}
{pt3dadd(163080.000000,151908.000000,51900.000000,226.277900)}
{pt3dadd(163104.000000,151824.000000,51650.000000,228.540680)}
{pt3dadd(163188.000000,151668.000000,51500.000000,233.179374)}
{pt3dadd(163152.000000,151584.000000,51350.000000,240.312784)}
{pt3dadd(163128.000000,151536.000000,51200.000000,247.446194)}
{pt3dadd(163080.000000,151416.000000,51050.000000,279.593014)}
{pt3dadd(163068.000000,151368.000000,50900.000000,317.410800)}
{pt3dadd(162996.000000,151224.000000,50625.000000,325.275386)}
{pt3dadd(162948.000000,151200.000000,50375.000000,343.092652)}
{pt3dadd(163044.000000,151236.000000,50075.000000,354.382806)}
{pt3dadd(162924.000000,151128.000000,49800.000000,340.659550)}
{pt3dadd(162900.000000,151044.000000,49600.000000,329.039976)}
{pt3dadd(162912.000000,151032.000000,49425.000000,329.039976)}
{pt3dadd(163128.000000,151020.000000,49175.000000,306.352080)}
{pt3dadd(163260.000000,150972.000000,49000.000000,290.191296)}
{pt3dadd(163248.000000,150972.000000,48825.000000,276.406426)}
{pt3dadd(163296.000000,150912.000000,48625.000000,252.584128)}
{pt3dadd(163428.000000,150924.000000,48450.000000,252.584128)}
{pt3dadd(163512.000000,150924.000000,48225.000000,262.824628)}
{pt3dadd(163536.000000,150924.000000,48050.000000,282.169372)}
{pt3dadd(163548.000000,150876.000000,47825.000000,303.968040)}
{pt3dadd(163596.000000,150876.000000,47600.000000,334.315520)}

{create adhoc29}
{access adhoc29}
{connect adhoc29(1), adhoc28(0)}
{nseg = 1}
{strdef color color = "White"}
{pt3dclear()}
{pt3dadd(163596.000000,150876.000000,47600.000000,334.315520)}
{pt3dadd(163860.000000,150840.000000,47325.000000,240.900630)}
{pt3dadd(163968.000000,150528.000000,47250.000000,208.941548)}
{pt3dadd(164016.000000,150372.000000,47150.000000,168.538444)}
{pt3dadd(164004.000000,150300.000000,47025.000000,142.644170)}
{pt3dadd(164076.000000,150180.000000,46900.000000,138.861170)}
{pt3dadd(164076.000000,150120.000000,46800.000000,134.690410)}
{pt3dadd(164196.000000,150024.000000,46675.000000,131.550760)}
{pt3dadd(164136.000000,150036.000000,46550.000000,137.253056)}
{pt3dadd(164244.000000,149868.000000,46475.000000,145.415352)}
{pt3dadd(164268.000000,149760.000000,46375.000000,152.046112)}
{pt3dadd(164196.000000,149628.000000,46275.000000,157.748408)}
{pt3dadd(164208.000000,149460.000000,45925.000000,159.279944)}
{pt3dadd(164196.000000,149316.000000,45875.000000,164.349528)}
{pt3dadd(164196.000000,149172.000000,45550.000000,167.646162)}
{pt3dadd(164208.000000,149028.000000,45300.000000,180.115954)}
{pt3dadd(164208.000000,148860.000000,45075.000000,189.001802)}
{pt3dadd(164148.000000,148740.000000,44875.000000,197.887650)}
{pt3dadd(164184.000000,148632.000000,44750.000000,205.911350)}
{pt3dadd(164184.000000,148488.000000,44700.000000,211.500564)}
{pt3dadd(164112.000000,148332.000000,44600.000000,215.918372)}
{pt3dadd(164112.000000,148188.000000,44525.000000,213.963700)}
{pt3dadd(164076.000000,148056.000000,44550.000000,225.304546)}
{pt3dadd(164004.000000,147936.000000,44325.000000,237.807826)}
{pt3dadd(164016.000000,147816.000000,44200.000000,249.148672)}
{pt3dadd(164052.000000,147756.000000,44275.000000,256.638752)}
{pt3dadd(163908.000000,147696.000000,44150.000000,256.638752)}
{pt3dadd(163980.000000,147564.000000,44000.000000,247.350314)}
{pt3dadd(164040.000000,147468.000000,43875.000000,232.692006)}
{pt3dadd(164124.000000,147432.000000,43750.000000,227.821376)}
{pt3dadd(164532.000000,147444.000000,43700.000000,206.583346)}
{pt3dadd(164844.000000,147432.000000,43625.000000,198.120634)}
{pt3dadd(164952.000000,147288.000000,43500.000000,188.790492)}
{pt3dadd(165276.000000,147108.000000,43425.000000,193.208300)}
{pt3dadd(165636.000000,146928.000000,43350.000000,188.790492)}
{pt3dadd(165816.000000,146880.000000,43275.000000,198.120634)}
{pt3dadd(166104.000000,146712.000000,43175.000000,210.590426)}
{pt3dadd(166332.000000,146580.000000,43100.000000,210.590426)}
{pt3dadd(166572.000000,146568.000000,43000.000000,196.842476)}
{pt3dadd(166752.000000,146484.000000,42925.000000,178.941924)}
{pt3dadd(166956.000000,146520.000000,42425.000000,161.041372)}
{pt3dadd(167172.000000,146604.000000,42100.000000,143.140820)}
{pt3dadd(167460.000000,146760.000000,41675.000000,134.570410)}
{pt3dadd(167232.000000,146724.000000,41525.000000,126.000000)}
{pt3dadd(167376.000000,146712.000000,41400.000000,127.260000)}
{pt3dadd(167376.000000,146712.000000,41250.000000,131.232150)}
{pt3dadd(167472.000000,146664.000000,41125.000000,132.492150)}
{pt3dadd(167532.000000,146736.000000,40975.000000,127.037010)}
{pt3dadd(167580.000000,146724.000000,40800.000000,122.569113)}
{pt3dadd(167676.000000,146688.000000,40725.000000,115.853973)}
{pt3dadd(167676.000000,146676.000000,40650.000000,107.413926)}
{pt3dadd(167760.000000,146616.000000,40550.000000,102.722634)}
{pt3dadd(167916.000000,146544.000000,40450.000000,105.834916)}
{pt3dadd(168048.000000,146568.000000,40425.000000,107.959955)}
{pt3dadd(168096.000000,146544.000000,40275.000000,112.215095)}
{pt3dadd(168228.000000,146460.000000,40100.000000,113.251700)}
{pt3dadd(168396.000000,146304.000000,39975.000000,114.340134)}
{pt3dadd(168624.000000,146220.000000,39850.000000,119.265992)}
{pt3dadd(168900.000000,146052.000000,39675.000000,131.867780)}
{pt3dadd(169224.000000,145944.000000,39600.000000,145.099660)}
{pt3dadd(169308.000000,145860.000000,39475.000000,162.424424)}
{pt3dadd(169404.000000,145824.000000,39350.000000,170.198042)}
{pt3dadd(169764.000000,145716.000000,39350.000000,177.873972)}
{pt3dadd(170040.000000,145656.000000,39350.000000,171.587192)}
{pt3dadd(170316.000000,145608.000000,39250.000000,162.138312)}
{pt3dadd(170568.000000,145584.000000,39100.000000,152.216990)}
{pt3dadd(170748.000000,145668.000000,39075.000000,152.216990)}
{pt3dadd(170988.000000,145632.000000,38925.000000,141.958060)}
{pt3dadd(171180.000000,145800.000000,38925.000000,135.643052)}
{pt3dadd(171264.000000,145956.000000,38825.000000,127.604912)}
{pt3dadd(171336.000000,146088.000000,38675.000000,117.237390)}
{pt3dadd(171480.000000,146136.000000,38650.000000,108.375338)}
{pt3dadd(171600.000000,146256.000000,38575.000000,102.920198)}
{pt3dadd(171696.000000,146352.000000,38475.000000,102.920198)}
{pt3dadd(171672.000000,146448.000000,38350.000000,103.907441)}
{pt3dadd(171816.000000,146628.000000,38250.000000,104.847673)}
{pt3dadd(171756.000000,146700.000000,38100.000000,102.823825)}
{pt3dadd(171804.000000,146700.000000,38050.000000,102.823825)}
{pt3dadd(171804.000000,146712.000000,37950.000000,97.875852)}
{pt3dadd(171792.000000,146772.000000,37825.000000,95.664815)}
{pt3dadd(171756.000000,146748.000000,37700.000000,89.545845)}

{create adhoc30}
{access adhoc30}
{connect adhoc30(1), adhoc28(0)}
{nseg = 1}
{strdef color color = "White"}
{pt3dclear()}
{pt3dadd(163596.000000,150876.000000,47600.000000,334.315520)}
{pt3dadd(163800.000000,151032.000000,47250.000000,230.635773)}
{pt3dadd(163908.000000,151164.000000,46875.000000,205.922284)}
{pt3dadd(163848.000000,151236.000000,46725.000000,174.518110)}
{pt3dadd(163944.000000,151284.000000,46575.000000,157.630510)}
{pt3dadd(164076.000000,151296.000000,46425.000000,164.261270)}
{pt3dadd(163896.000000,151392.000000,46225.000000,165.949790)}
{pt3dadd(164064.000000,151452.000000,46075.000000,171.272852)}
{pt3dadd(164100.000000,151500.000000,45900.000000,169.584332)}
{pt3dadd(164208.000000,151584.000000,45750.000000,169.584332)}
{pt3dadd(164196.000000,151584.000000,45750.000000,178.047044)}
{pt3dadd(164208.000000,151680.000000,45550.000000,176.358524)}
{pt3dadd(164184.000000,151704.000000,45550.000000,171.035462)}
{pt3dadd(164328.000000,151836.000000,45325.000000,171.035462)}
{pt3dadd(164328.000000,151896.000000,45100.000000,181.452846)}
{pt3dadd(164244.000000,151956.000000,44850.000000,183.407518)}
{pt3dadd(164316.000000,152016.000000,44575.000000,188.730580)}
{pt3dadd(164328.000000,152136.000000,44325.000000,190.419100)}
{pt3dadd(164340.000000,152208.000000,44125.000000,190.419100)}
{pt3dadd(164316.000000,152328.000000,43950.000000,184.829886)}
{pt3dadd(164184.000000,152388.000000,43800.000000,172.953892)}
{pt3dadd(164076.000000,152436.000000,43600.000000,172.953892)}
{pt3dadd(163992.000000,152580.000000,43325.000000,187.389236)}
{pt3dadd(163752.000000,153000.000000,42950.000000,217.297970)}
{pt3dadd(163416.000000,153276.000000,42500.000000,236.847480)}
{pt3dadd(163392.000000,153552.000000,42150.000000,250.775882)}
{pt3dadd(163368.000000,153816.000000,41800.000000,248.914290)}
{pt3dadd(163440.000000,153888.000000,41525.000000,232.790426)}
{pt3dadd(163524.000000,153948.000000,41175.000000,208.204754)}
{pt3dadd(163608.000000,154080.000000,40825.000000,192.289786)}
{pt3dadd(163692.000000,154212.000000,40525.000000,192.289786)}
{pt3dadd(163776.000000,154344.000000,40100.000000,202.576266)}
{pt3dadd(163920.000000,154548.000000,39725.000000,221.194846)}
{pt3dadd(163800.000000,154620.000000,39275.000000,231.995648)}
{pt3dadd(163716.000000,154776.000000,38925.000000,240.420536)}
{pt3dadd(163644.000000,154944.000000,38625.000000,240.420536)}
{pt3dadd(163572.000000,155100.000000,38350.000000,233.950320)}
{pt3dadd(163680.000000,155160.000000,38075.000000,236.569770)}
{pt3dadd(163860.000000,155220.000000,37825.000000,231.931076)}
{pt3dadd(164040.000000,155292.000000,37525.000000,213.584866)}
{pt3dadd(164280.000000,155484.000000,37250.000000,195.684314)}
{pt3dadd(166236.000000,155688.000000,36450.000000,181.096170)}
{pt3dadd(167772.000000,155928.000000,35850.000000,152.547730)}
{pt3dadd(169908.000000,155964.000000,35600.000000,133.752150)}
{pt3dadd(171348.000000,156000.000000,35275.000000,124.324860)}
{pt3dadd(172068.000000,156036.000000,34925.000000,118.869720)}
{pt3dadd(172656.000000,156084.000000,34575.000000,124.572016)}
{pt3dadd(173376.000000,155952.000000,34150.000000,128.742776)}
{pt3dadd(174072.000000,155844.000000,33725.000000,134.445072)}
{pt3dadd(176460.000000,155544.000000,33300.000000,142.483212)}
{pt3dadd(177300.000000,155124.000000,32400.000000,150.521352)}
{pt3dadd(177780.000000,154632.000000,32000.000000,146.213827)}
{pt3dadd(178224.000000,153696.000000,31250.000000,138.915000)}

{create adhoc31}
{access adhoc31}
{connect adhoc31(1), adhoc21(0)}
{nseg = 1}
{strdef color color = "White"}
{pt3dclear()}
{pt3dadd(187392.000000,145776.000000,92975.000000,387.012000)}
{pt3dadd(187212.000000,145284.000000,92975.000000,394.091863)}
{pt3dadd(187308.000000,144660.000000,92975.000000,344.488278)}
{pt3dadd(187356.000000,144408.000000,92975.000000,289.943020)}
{pt3dadd(187248.000000,144204.000000,93125.000000,226.375582)}
{pt3dadd(187164.000000,143964.000000,93125.000000,173.391113)}
{pt3dadd(187092.000000,143760.000000,93225.000000,122.448713)}
{pt3dadd(187008.000000,143604.000000,93300.000000,115.817953)}
{pt3dadd(186936.000000,143304.000000,93400.000000,118.160811)}
{pt3dadd(186828.000000,142944.000000,93475.000000,120.392103)}
{pt3dadd(186756.000000,142692.000000,93525.000000,123.660000)}
{pt3dadd(186660.000000,142500.000000,93600.000000,121.200000)}
{pt3dadd(186588.000000,142380.000000,93575.000000,121.200000)}
{pt3dadd(186516.000000,142308.000000,93625.000000,122.460000)}
{pt3dadd(186396.000000,142188.000000,93650.000000,123.660000)}
{pt3dadd(186276.000000,142032.000000,93725.000000,122.517142)}
{pt3dadd(186144.000000,141876.000000,93700.000000,121.374284)}
{pt3dadd(186060.000000,141792.000000,93775.000000,120.231426)}
{pt3dadd(185940.000000,141720.000000,93800.000000,113.516286)}
{pt3dadd(185820.000000,141648.000000,93825.000000,112.316286)}
{pt3dadd(185796.000000,141552.000000,93750.000000,111.227852)}
{pt3dadd(185652.000000,141600.000000,93875.000000,112.370710)}
{pt3dadd(185604.000000,141492.000000,93875.000000,111.282276)}
{pt3dadd(185640.000000,141408.000000,93900.000000,111.282276)}
{pt3dadd(185604.000000,141300.000000,93850.000000,109.050984)}
{pt3dadd(185664.000000,141192.000000,93850.000000,107.027136)}
{pt3dadd(185616.000000,141072.000000,93775.000000,105.884278)}
{pt3dadd(185580.000000,140940.000000,93725.000000,104.847673)}
{pt3dadd(185760.000000,140784.000000,93575.000000,120.561743)}
{pt3dadd(185964.000000,140592.000000,93575.000000,134.251965)}
{pt3dadd(186192.000000,140328.000000,93425.000000,151.738985)}
{pt3dadd(186216.000000,140220.000000,93375.000000,164.340773)}
{pt3dadd(186300.000000,140100.000000,93400.000000,175.770966)}
{pt3dadd(186300.000000,139980.000000,93350.000000,163.169178)}
{pt3dadd(186504.000000,139740.000000,93350.000000,155.493248)}
{pt3dadd(186696.000000,139500.000000,93350.000000,138.004063)}
{pt3dadd(186732.000000,139320.000000,93350.000000,138.915000)}

{create adhoc32}
{access adhoc32}
{connect adhoc32(1), adhoc31(0)}
{nseg = 1}
{strdef color color = "White"}
{pt3dclear()}
{pt3dadd(186732.000000,139320.000000,93350.000000,138.915000)}
{pt3dadd(186720.000000,138984.000000,93350.000000,138.915000)}
{pt3dadd(186780.000000,138804.000000,93350.000000,137.592000)}
{pt3dadd(186732.000000,138672.000000,93225.000000,133.809000)}
{pt3dadd(186780.000000,138312.000000,93175.000000,131.226000)}
{pt3dadd(186756.000000,137868.000000,93075.000000,138.901930)}
{pt3dadd(186780.000000,137640.000000,93025.000000,153.490074)}
{pt3dadd(186708.000000,137316.000000,92975.000000,159.477484)}
{pt3dadd(186696.000000,137160.000000,92925.000000,169.247894)}
{pt3dadd(186672.000000,136872.000000,92850.000000,183.141366)}
{pt3dadd(186600.000000,136464.000000,92775.000000,188.730580)}
{pt3dadd(186552.000000,136296.000000,92725.000000,183.141366)}
{pt3dadd(186504.000000,136212.000000,92650.000000,173.370956)}
{pt3dadd(186456.000000,136104.000000,92600.000000,161.369254)}
{pt3dadd(186324.000000,135756.000000,92550.000000,151.447932)}
{pt3dadd(186276.000000,135408.000000,92550.000000,139.571938)}
{pt3dadd(186228.000000,135048.000000,92550.000000,133.285158)}
{pt3dadd(186204.000000,134892.000000,92575.000000,135.745158)}
{pt3dadd(186204.000000,134760.000000,92550.000000,141.759450)}
{pt3dadd(186204.000000,134640.000000,92575.000000,139.047300)}
{pt3dadd(186180.000000,134544.000000,92575.000000,140.505910)}
{pt3dadd(186192.000000,134436.000000,92600.000000,137.793760)}
{pt3dadd(186180.000000,134328.000000,92650.000000,137.793760)}
{pt3dadd(186180.000000,134208.000000,92675.000000,135.210760)}
{pt3dadd(186192.000000,134100.000000,92650.000000,135.210760)}
{pt3dadd(186168.000000,133992.000000,92625.000000,132.363000)}
{pt3dadd(186144.000000,133872.000000,92675.000000,129.903000)}
{pt3dadd(186108.000000,133752.000000,92600.000000,127.443000)}
{pt3dadd(186120.000000,133632.000000,92625.000000,124.011708)}
{pt3dadd(186084.000000,133524.000000,92650.000000,122.751708)}
{pt3dadd(186084.000000,133428.000000,92625.000000,117.825850)}
{pt3dadd(186072.000000,133332.000000,92625.000000,116.682992)}
{pt3dadd(186060.000000,133188.000000,92575.000000,114.451700)}
{pt3dadd(186036.000000,133056.000000,92525.000000,115.540134)}
{pt3dadd(186012.000000,132924.000000,92475.000000,113.197276)}
{pt3dadd(186012.000000,132792.000000,92450.000000,113.197276)}
{pt3dadd(185988.000000,132672.000000,92425.000000,112.108842)}
{pt3dadd(185940.000000,132564.000000,92450.000000,113.197276)}
{pt3dadd(185868.000000,132468.000000,92500.000000,113.197276)}
{pt3dadd(185904.000000,132360.000000,92450.000000,115.540134)}
{pt3dadd(185856.000000,132240.000000,92500.000000,119.142992)}
{pt3dadd(185844.000000,132120.000000,92500.000000,122.574284)}
{pt3dadd(185844.000000,131988.000000,92500.000000,126.177142)}
{pt3dadd(185748.000000,131892.000000,92575.000000,128.520000)}
{pt3dadd(185748.000000,131772.000000,92575.000000,127.320000)}
{pt3dadd(185736.000000,131640.000000,92550.000000,124.860000)}
{pt3dadd(185724.000000,131532.000000,92550.000000,123.660000)}
{pt3dadd(185652.000000,131412.000000,92600.000000,121.200000)}
{pt3dadd(185652.000000,131304.000000,92600.000000,120.000000)}
{pt3dadd(185580.000000,131196.000000,92675.000000,125.172150)}
{pt3dadd(185496.000000,131088.000000,92750.000000,131.802910)}
{pt3dadd(185460.000000,130920.000000,92725.000000,138.433670)}
{pt3dadd(185472.000000,130800.000000,92725.000000,146.595966)}
{pt3dadd(185472.000000,130692.000000,92750.000000,156.366376)}
{pt3dadd(185448.000000,130608.000000,92800.000000,153.654226)}
{pt3dadd(185448.000000,130536.000000,92825.000000,149.483466)}
{pt3dadd(185400.000000,130392.000000,92775.000000,140.621414)}
{pt3dadd(185424.000000,130284.000000,92900.000000,130.227826)}
{pt3dadd(185376.000000,130176.000000,92900.000000,125.629566)}
{pt3dadd(185364.000000,130032.000000,92850.000000,129.800326)}
{pt3dadd(185340.000000,129780.000000,92800.000000,133.971086)}
{pt3dadd(185304.000000,129612.000000,92775.000000,141.374528)}
{pt3dadd(185328.000000,129576.000000,92700.000000,150.236580)}
{pt3dadd(185208.000000,129312.000000,92625.000000,150.236580)}
{pt3dadd(185100.000000,129168.000000,92550.000000,148.777970)}
{pt3dadd(185040.000000,129060.000000,92500.000000,147.319360)}
{pt3dadd(184980.000000,128964.000000,92425.000000,144.607210)}
{pt3dadd(184944.000000,128760.000000,92350.000000,141.759450)}
{pt3dadd(184896.000000,128700.000000,92275.000000,143.218060)}
{pt3dadd(184836.000000,128568.000000,92225.000000,143.218060)}
{pt3dadd(184716.000000,128460.000000,92175.000000,144.676670)}
{pt3dadd(184608.000000,128220.000000,92125.000000,148.847430)}
{pt3dadd(184500.000000,127968.000000,92050.000000,153.226726)}
{pt3dadd(184404.000000,127680.000000,91975.000000,151.768116)}
{pt3dadd(184320.000000,127464.000000,91900.000000,151.768116)}
{pt3dadd(184272.000000,127284.000000,91825.000000,147.597356)}
{pt3dadd(184224.000000,127044.000000,91725.000000,150.737006)}
{pt3dadd(184032.000000,126420.000000,91625.000000,150.737006)}
{pt3dadd(183864.000000,125880.000000,91575.000000,155.335266)}
{pt3dadd(183828.000000,125556.000000,91575.000000,156.793876)}
{pt3dadd(183768.000000,125064.000000,91525.000000,160.964636)}
{pt3dadd(183636.000000,124512.000000,91475.000000,157.824986)}
{pt3dadd(183600.000000,124212.000000,91400.000000,159.433100)}
{pt3dadd(183552.000000,124128.000000,91325.000000,166.710834)}
{pt3dadd(183384.000000,123828.000000,91400.000000,169.850484)}
{pt3dadd(183300.000000,123648.000000,91475.000000,171.382020)}
{pt3dadd(183192.000000,123408.000000,91575.000000,176.210190)}
{pt3dadd(183180.000000,123288.000000,91625.000000,179.671660)}
{pt3dadd(183132.000000,123204.000000,91700.000000,172.393926)}
{pt3dadd(183024.000000,123144.000000,91800.000000,172.393926)}
{pt3dadd(183012.000000,123072.000000,91900.000000,170.862390)}
{pt3dadd(182952.000000,122952.000000,91975.000000,161.863460)}
{pt3dadd(182928.000000,122940.000000,92050.000000,149.831580)}
{pt3dadd(182844.000000,122796.000000,92150.000000,136.793273)}
{pt3dadd(182820.000000,122700.000000,92225.000000,123.754966)}
{pt3dadd(182748.000000,122664.000000,92325.000000,114.892914)}
{pt3dadd(182628.000000,122568.000000,92425.000000,110.201622)}
{pt3dadd(182556.000000,122568.000000,92500.000000,106.770330)}
{pt3dadd(182532.000000,122544.000000,92600.000000,115.210377)}
{pt3dadd(182544.000000,122508.000000,92675.000000,131.710154)}
{pt3dadd(182460.000000,122496.000000,92775.000000,149.034918)}
{pt3dadd(182448.000000,122460.000000,92850.000000,172.521790)}
{pt3dadd(182376.000000,122460.000000,92950.000000,198.271442)}
{pt3dadd(182328.000000,122424.000000,93075.000000,214.354872)}
{pt3dadd(182292.000000,122388.000000,93200.000000,224.641352)}
{pt3dadd(182244.000000,122364.000000,93300.000000,235.442154)}
{pt3dadd(182208.000000,122352.000000,93400.000000,242.575564)}
{pt3dadd(182160.000000,122328.000000,93500.000000,247.446194)}
{pt3dadd(182124.000000,122352.000000,93600.000000,254.579604)}
{pt3dadd(182112.000000,122316.000000,93675.000000,252.316824)}
{pt3dadd(182100.000000,122340.000000,93775.000000,249.940910)}
{pt3dadd(182076.000000,122232.000000,93850.000000,221.551920)}
{pt3dadd(182052.000000,122220.000000,93925.000000,195.622930)}
{pt3dadd(182028.000000,122184.000000,94025.000000,166.091082)}
{pt3dadd(181980.000000,122112.000000,94075.000000,147.295502)}
{pt3dadd(181944.000000,122052.000000,94175.000000,124.977142)}
{pt3dadd(181944.000000,122040.000000,94250.000000,130.149292)}
{pt3dadd(181968.000000,122028.000000,94325.000000,131.472292)}
{pt3dadd(181860.000000,122016.000000,94350.000000,137.787300)}
{pt3dadd(181896.000000,121980.000000,94425.000000,139.110300)}
{pt3dadd(181872.000000,121932.000000,94475.000000,146.072596)}
{pt3dadd(181812.000000,121872.000000,94550.000000,147.531206)}
{pt3dadd(181728.000000,121800.000000,94650.000000,150.378966)}
{pt3dadd(181704.000000,121788.000000,94700.000000,154.977226)}
{pt3dadd(181656.000000,121788.000000,94775.000000,160.964636)}
{pt3dadd(181596.000000,121764.000000,94825.000000,167.895812)}
{pt3dadd(181584.000000,121764.000000,94900.000000,174.496932)}
{pt3dadd(181572.000000,121716.000000,94975.000000,176.028468)}
{pt3dadd(181524.000000,121668.000000,95025.000000,174.420354)}
{pt3dadd(181524.000000,121632.000000,95100.000000,169.822094)}
{pt3dadd(181524.000000,121584.000000,95175.000000,159.900772)}
{pt3dadd(181428.000000,121572.000000,95200.000000,149.128892)}
{pt3dadd(181332.000000,121560.000000,95275.000000,138.735304)}
{pt3dadd(181320.000000,121560.000000,95350.000000,128.341716)}
{pt3dadd(181248.000000,121512.000000,95400.000000,122.026708)}
{pt3dadd(181224.000000,121476.000000,95500.000000,114.623266)}
{pt3dadd(181224.000000,121488.000000,95600.000000,114.623266)}
{pt3dadd(181212.000000,121476.000000,95675.000000,125.016854)}
{pt3dadd(181164.000000,121428.000000,95750.000000,135.410442)}
{pt3dadd(181056.000000,121332.000000,95900.000000,148.012230)}
{pt3dadd(180984.000000,121320.000000,96000.000000,165.336994)}
{pt3dadd(180936.000000,121284.000000,96075.000000,184.132574)}
{pt3dadd(180912.000000,121272.000000,96150.000000,193.018422)}
{pt3dadd(180888.000000,121224.000000,96300.000000,196.315056)}
{pt3dadd(180744.000000,121188.000000,96475.000000,194.626536)}
{pt3dadd(180552.000000,121128.000000,96650.000000,189.303474)}
{pt3dadd(180468.000000,121116.000000,96775.000000,179.506824)}
{pt3dadd(180336.000000,121128.000000,96925.000000,166.241680)}
{pt3dadd(180216.000000,121116.000000,96975.000000,161.413510)}
{pt3dadd(180156.000000,121116.000000,97100.000000,159.805396)}
{pt3dadd(180084.000000,121092.000000,97150.000000,152.494986)}
{pt3dadd(180000.000000,121116.000000,97250.000000,139.893198)}
{pt3dadd(179916.000000,121116.000000,97300.000000,133.878906)}
{pt3dadd(179808.000000,121104.000000,97400.000000,126.105288)}
{pt3dadd(179772.000000,121116.000000,97450.000000,114.675095)}
{pt3dadd(179724.000000,121128.000000,97525.000000,108.947198)}
{pt3dadd(179616.000000,121080.000000,97625.000000,110.090056)}
{pt3dadd(179568.000000,121068.000000,97675.000000,109.053451)}
{pt3dadd(179544.000000,121080.000000,97750.000000,105.941169)}
{pt3dadd(179496.000000,121092.000000,97825.000000,104.013694)}
{pt3dadd(179448.000000,121116.000000,97875.000000,103.026451)}
{pt3dadd(179364.000000,121104.000000,97950.000000,98.771311)}
{pt3dadd(179304.000000,121116.000000,98000.000000,98.771311)}
{pt3dadd(179268.000000,121140.000000,98100.000000,99.758554)}
{pt3dadd(179208.000000,121128.000000,98175.000000,110.126076)}
{pt3dadd(179136.000000,121152.000000,98250.000000,113.238358)}
{pt3dadd(179052.000000,121200.000000,98350.000000,117.493498)}
{pt3dadd(179028.000000,121200.000000,98475.000000,125.933545)}
{pt3dadd(178980.000000,121212.000000,98550.000000,130.401442)}
{pt3dadd(178944.000000,121248.000000,98675.000000,129.012292)}
{pt3dadd(178920.000000,121248.000000,98750.000000,133.938150)}
{pt3dadd(178836.000000,121248.000000,98825.000000,140.568910)}
{pt3dadd(178776.000000,121248.000000,98900.000000,137.856760)}
{pt3dadd(178764.000000,121248.000000,99000.000000,141.828910)}
{pt3dadd(178680.000000,121248.000000,99125.000000,147.816320)}
{pt3dadd(178584.000000,121236.000000,99200.000000,150.664080)}
{pt3dadd(178500.000000,121224.000000,99275.000000,161.081464)}
{pt3dadd(178440.000000,121224.000000,99375.000000,175.669608)}
{pt3dadd(178380.000000,121224.000000,99500.000000,194.015818)}
{pt3dadd(178296.000000,121212.000000,99575.000000,210.139682)}
{pt3dadd(178236.000000,121236.000000,99675.000000,229.403196)}
{pt3dadd(178152.000000,121272.000000,99750.000000,246.113912)}
{pt3dadd(178068.000000,121296.000000,99825.000000,268.744912)}
{pt3dadd(177984.000000,121320.000000,99925.000000,278.985412)}
{pt3dadd(177948.000000,121356.000000,100025.000000,278.985412)}
{pt3dadd(177924.000000,121380.000000,100075.000000,289.737938)}
{pt3dadd(177900.000000,121416.000000,100225.000000,298.842182)}
{pt3dadd(177780.000000,121428.000000,100350.000000,285.057312)}
{pt3dadd(177756.000000,121464.000000,100425.000000,274.816812)}
{pt3dadd(177684.000000,121488.000000,100525.000000,277.311528)}
{pt3dadd(177660.000000,121524.000000,100625.000000,255.758200)}
{pt3dadd(177672.000000,121536.000000,100725.000000,227.988568)}
{pt3dadd(177588.000000,121584.000000,100800.000000,210.256590)}
{pt3dadd(177564.000000,121608.000000,100825.000000,193.368990)}
{pt3dadd(177552.000000,121668.000000,100950.000000,171.610760)}
{pt3dadd(177528.000000,121716.000000,101025.000000,164.679584)}
{pt3dadd(177480.000000,121728.000000,101150.000000,153.369112)}
{pt3dadd(177420.000000,121788.000000,101225.000000,147.666816)}
{pt3dadd(177360.000000,121848.000000,101275.000000,144.819056)}
{pt3dadd(177324.000000,121884.000000,101375.000000,138.188296)}
{pt3dadd(177276.000000,121908.000000,101450.000000,133.809000)}
{pt3dadd(177240.000000,121920.000000,101525.000000,132.486000)}
{pt3dadd(177216.000000,121944.000000,101600.000000,135.198150)}
{pt3dadd(177192.000000,121968.000000,101650.000000,133.875150)}
{pt3dadd(177180.000000,121944.000000,101725.000000,136.335150)}
{pt3dadd(177144.000000,121968.000000,101775.000000,132.552150)}
{pt3dadd(177120.000000,121992.000000,101850.000000,130.092150)}
{pt3dadd(177084.000000,122016.000000,101925.000000,124.920000)}
{pt3dadd(177024.000000,122028.000000,102000.000000,127.632150)}
{pt3dadd(176964.000000,122040.000000,102075.000000,131.802910)}
{pt3dadd(176940.000000,122064.000000,102125.000000,138.433670)}
{pt3dadd(176892.000000,122028.000000,102200.000000,142.216670)}
{pt3dadd(176844.000000,122028.000000,102275.000000,150.378966)}
{pt3dadd(176820.000000,122028.000000,102350.000000,153.369112)}
{pt3dadd(176808.000000,122016.000000,102425.000000,159.970232)}
{pt3dadd(176772.000000,122016.000000,102475.000000,164.798402)}
{pt3dadd(176748.000000,122028.000000,102550.000000,180.115954)}
{pt3dadd(176760.000000,122040.000000,102625.000000,191.054210)}
{pt3dadd(176712.000000,122052.000000,102725.000000,194.350844)}
{pt3dadd(176640.000000,122004.000000,102825.000000,189.281260)}
{pt3dadd(176616.000000,122004.000000,102900.000000,182.994480)}
{pt3dadd(176592.000000,122016.000000,102975.000000,167.676928)}
{pt3dadd(176604.000000,122052.000000,103050.000000,152.359376)}
{pt3dadd(176544.000000,122028.000000,103225.000000,144.683446)}
{pt3dadd(176436.000000,122040.000000,103375.000000,140.304150)}
{pt3dadd(176388.000000,121980.000000,103500.000000,141.762760)}
{pt3dadd(176388.000000,122004.000000,103600.000000,140.439760)}
{pt3dadd(176316.000000,122040.000000,103725.000000,139.116760)}
{pt3dadd(176280.000000,122040.000000,103850.000000,139.116760)}
{pt3dadd(176196.000000,122052.000000,103925.000000,140.505910)}
{pt3dadd(176184.000000,122016.000000,104000.000000,139.047300)}
{pt3dadd(176136.000000,121992.000000,104100.000000,139.047300)}
{pt3dadd(176088.000000,121992.000000,104150.000000,144.749596)}
{pt3dadd(176040.000000,121992.000000,104250.000000,149.128892)}
{pt3dadd(176004.000000,121980.000000,104350.000000,152.119038)}
{pt3dadd(175908.000000,122004.000000,104475.000000,155.109184)}
{pt3dadd(175836.000000,122016.000000,104575.000000,156.432184)}
{pt3dadd(175764.000000,122016.000000,104700.000000,153.442038)}
{pt3dadd(175668.000000,121980.000000,104825.000000,153.442038)}
{pt3dadd(175584.000000,121956.000000,104925.000000,156.738672)}
{pt3dadd(175560.000000,122040.000000,105050.000000,155.207136)}
{pt3dadd(175536.000000,122004.000000,105200.000000,162.883066)}
{pt3dadd(175452.000000,122028.000000,105300.000000,169.169846)}
{pt3dadd(175464.000000,122064.000000,105425.000000,174.239430)}
{pt3dadd(175404.000000,122136.000000,105575.000000,176.012380)}
{pt3dadd(175392.000000,122124.000000,105675.000000,184.475092)}
{pt3dadd(175320.000000,122160.000000,105725.000000,181.178458)}
{pt3dadd(175272.000000,122184.000000,105825.000000,184.813000)}
{pt3dadd(175224.000000,122184.000000,105925.000000,184.813000)}
{pt3dadd(175212.000000,122172.000000,106025.000000,184.813000)}
{pt3dadd(175140.000000,122184.000000,106150.000000,177.881824)}
{pt3dadd(174972.000000,122172.000000,106275.000000,177.881824)}
{pt3dadd(174912.000000,122184.000000,106375.000000,170.950648)}
{pt3dadd(174816.000000,122136.000000,106500.000000,160.178768)}
{pt3dadd(174708.000000,122076.000000,106575.000000,153.577648)}
{pt3dadd(174624.000000,122040.000000,106650.000000,146.615352)}
{pt3dadd(174636.000000,122052.000000,106700.000000,140.913056)}
{pt3dadd(174588.000000,122028.000000,106775.000000,133.950760)}
{pt3dadd(174540.000000,121992.000000,106850.000000,131.490760)}
{pt3dadd(174468.000000,121980.000000,106950.000000,128.643000)}
{pt3dadd(174408.000000,121980.000000,107025.000000,138.901930)}
{pt3dadd(174336.000000,121908.000000,107100.000000,146.212340)}
{pt3dadd(174240.000000,121860.000000,107175.000000,156.471270)}
{pt3dadd(174156.000000,121836.000000,107250.000000,167.930200)}
{pt3dadd(174096.000000,121788.000000,107300.000000,170.777960)}
{pt3dadd(174084.000000,121764.000000,107350.000000,167.481326)}
{pt3dadd(174012.000000,121752.000000,107425.000000,161.493916)}
{pt3dadd(173880.000000,121680.000000,107575.000000,152.494986)}
{pt3dadd(173820.000000,121620.000000,107625.000000,144.819056)}
{pt3dadd(173712.000000,121572.000000,107700.000000,140.648296)}
{pt3dadd(173592.000000,121560.000000,107800.000000,137.658150)}
{pt3dadd(173520.000000,121476.000000,107875.000000,140.505910)}
{pt3dadd(173448.000000,121416.000000,107950.000000,149.504840)}
{pt3dadd(173328.000000,121296.000000,108025.000000,162.769984)}
{pt3dadd(173136.000000,121176.000000,108075.000000,181.565564)}
{pt3dadd(173076.000000,121116.000000,108150.000000,202.287688)}
{pt3dadd(172944.000000,120924.000000,108150.000000,221.551202)}
{pt3dadd(172824.000000,120804.000000,108200.000000,233.610632)}
{pt3dadd(172644.000000,120756.000000,108325.000000,237.818068)}
{pt3dadd(172524.000000,120648.000000,108400.000000,235.663040)}
{pt3dadd(172404.000000,120648.000000,108375.000000,221.227696)}
{pt3dadd(172284.000000,120564.000000,108450.000000,212.381566)}
{pt3dadd(172212.000000,120516.000000,108425.000000,205.911350)}
{pt3dadd(172104.000000,120504.000000,108400.000000,203.756322)}
{pt3dadd(171972.000000,120408.000000,108425.000000,201.703914)}
{pt3dadd(171840.000000,120336.000000,108375.000000,213.763344)}
{pt3dadd(171708.000000,120336.000000,108375.000000,220.233560)}
{pt3dadd(171552.000000,120324.000000,108325.000000,220.233560)}
{pt3dadd(171456.000000,120240.000000,108375.000000,218.181152)}
{pt3dadd(171324.000000,120192.000000,108325.000000,216.226480)}
{pt3dadd(171216.000000,120168.000000,108325.000000,213.963700)}
{pt3dadd(171132.000000,120072.000000,108325.000000,205.538812)}
{pt3dadd(171000.000000,120000.000000,108375.000000,207.591220)}
{pt3dadd(170892.000000,119988.000000,108350.000000,202.002006)}
{pt3dadd(170748.000000,119964.000000,108400.000000,193.539294)}
{pt3dadd(170628.000000,119880.000000,108375.000000,178.914474)}
{pt3dadd(170520.000000,119820.000000,108375.000000,165.021002)}
{pt3dadd(170412.000000,119784.000000,108325.000000,144.777592)}
{pt3dadd(170304.000000,119712.000000,108325.000000,132.175804)}
{pt3dadd(170160.000000,119676.000000,108325.000000,124.402186)}
{pt3dadd(170040.000000,119640.000000,108325.000000,116.628568)}
{pt3dadd(169932.000000,119628.000000,108350.000000,115.428568)}
{pt3dadd(169824.000000,119640.000000,108325.000000,117.771426)}
{pt3dadd(169692.000000,119604.000000,108300.000000,118.914284)}
{pt3dadd(169608.000000,119592.000000,108275.000000,122.517142)}
{pt3dadd(169488.000000,119568.000000,108225.000000,126.120000)}
{pt3dadd(169380.000000,119508.000000,108150.000000,129.903000)}
{pt3dadd(169248.000000,119508.000000,108125.000000,129.903000)}
{pt3dadd(169116.000000,119436.000000,108000.000000,131.103000)}
{pt3dadd(169008.000000,119412.000000,107900.000000,133.815150)}
{pt3dadd(168900.000000,119352.000000,107875.000000,141.125560)}
{pt3dadd(168792.000000,119292.000000,107750.000000,150.574440)}
{pt3dadd(168684.000000,119280.000000,107725.000000,156.005200)}
{pt3dadd(168576.000000,119280.000000,107675.000000,162.967496)}
{pt3dadd(168456.000000,119292.000000,107550.000000,169.254276)}
{pt3dadd(168324.000000,119304.000000,107400.000000,169.254276)}
{pt3dadd(168204.000000,119304.000000,107325.000000,165.792806)}
{pt3dadd(168084.000000,119244.000000,107250.000000,168.932456)}
{pt3dadd(167964.000000,119184.000000,107150.000000,170.540570)}
{pt3dadd(167760.000000,119136.000000,107050.000000,170.540570)}
{pt3dadd(167472.000000,119016.000000,106900.000000,168.932456)}
{pt3dadd(167256.000000,118884.000000,106775.000000,164.334196)}
{pt3dadd(167232.000000,118800.000000,106700.000000,159.735936)}
{pt3dadd(167184.000000,118764.000000,106600.000000,153.748526)}
{pt3dadd(167148.000000,118716.000000,106500.000000,147.461746)}
{pt3dadd(167028.000000,118560.000000,106375.000000,150.758380)}
{pt3dadd(167016.000000,118536.000000,106325.000000,153.748526)}
{pt3dadd(167004.000000,118404.000000,106200.000000,167.676928)}
{pt3dadd(166932.000000,118344.000000,106100.000000,177.125808)}
{pt3dadd(166896.000000,118308.000000,106025.000000,193.209238)}
{pt3dadd(166932.000000,118248.000000,105950.000000,203.005888)}
{pt3dadd(166872.000000,118212.000000,105875.000000,216.099172)}
{pt3dadd(166908.000000,118152.000000,105775.000000,218.254200)}
{pt3dadd(166932.000000,118044.000000,105650.000000,213.184616)}
{pt3dadd(166836.000000,118032.000000,105550.000000,201.699446)}
{pt3dadd(166848.000000,117840.000000,105475.000000,193.675746)}
{pt3dadd(166776.000000,117588.000000,105300.000000,189.468310)}
{pt3dadd(166740.000000,117492.000000,105200.000000,181.444610)}
{pt3dadd(166668.000000,117432.000000,105100.000000,188.375786)}
{pt3dadd(166680.000000,117396.000000,105050.000000,191.837256)}
{pt3dadd(166608.000000,117360.000000,104975.000000,186.767672)}
{pt3dadd(166620.000000,117336.000000,104925.000000,181.178458)}
{pt3dadd(166548.000000,117276.000000,104825.000000,177.716988)}
{pt3dadd(166512.000000,117264.000000,104725.000000,174.082446)}
{pt3dadd(166464.000000,117240.000000,104650.000000,174.082446)}
{pt3dadd(166416.000000,117216.000000,104550.000000,187.175730)}
{pt3dadd(166416.000000,117156.000000,104450.000000,201.611074)}
{pt3dadd(166248.000000,117048.000000,104300.000000,225.599524)}
{pt3dadd(165936.000000,116856.000000,104075.000000,245.149034)}
{pt3dadd(165828.000000,116748.000000,103875.000000,262.925594)}
{pt3dadd(165744.000000,116676.000000,103800.000000,270.059004)}
{pt3dadd(165744.000000,116652.000000,103725.000000,253.935140)}
{pt3dadd(165612.000000,116520.000000,103600.000000,221.376280)}
{pt3dadd(165384.000000,116412.000000,103525.000000,196.998600)}
{pt3dadd(165060.000000,116304.000000,103475.000000,174.152456)}
{pt3dadd(164832.000000,116256.000000,103400.000000,155.533876)}
{pt3dadd(164544.000000,116172.000000,103325.000000,158.995346)}
{pt3dadd(164268.000000,116076.000000,103250.000000,172.888818)}
{pt3dadd(164160.000000,116016.000000,103200.000000,185.358610)}
{pt3dadd(163884.000000,115848.000000,103125.000000,203.090588)}
{pt3dadd(163764.000000,115740.000000,103075.000000,221.709168)}
{pt3dadd(163608.000000,115644.000000,102975.000000,242.306360)}
{pt3dadd(163440.000000,115476.000000,102875.000000,261.944950)}

{create adhoc33}
{access adhoc33}
{connect adhoc33(1), adhoc32(0)}
{nseg = 1}
{strdef color color = "White"}
{pt3dclear()}
{pt3dadd(163440.000000,115476.000000,102875.000000,261.944950)}
{pt3dadd(163188.000000,115392.000000,102875.000000,191.368117)}
{pt3dadd(163116.000000,115284.000000,102875.000000,153.370358)}
{pt3dadd(162984.000000,115176.000000,102925.000000,119.785996)}
{pt3dadd(162852.000000,115104.000000,102975.000000,101.358744)}
{pt3dadd(162732.000000,115056.000000,103050.000000,95.903604)}
{pt3dadd(162720.000000,115056.000000,103100.000000,96.843836)}
{pt3dadd(162684.000000,115008.000000,103200.000000,96.843836)}
{pt3dadd(162648.000000,115020.000000,103275.000000,99.807916)}
{pt3dadd(162612.000000,114912.000000,103375.000000,102.771996)}
{pt3dadd(162540.000000,114936.000000,103450.000000,104.795844)}
{pt3dadd(162552.000000,114912.000000,103525.000000,104.795844)}
{pt3dadd(162480.000000,114876.000000,103625.000000,105.783087)}
{pt3dadd(162432.000000,114864.000000,103675.000000,102.819007)}
{pt3dadd(162420.000000,114864.000000,103750.000000,99.854927)}
{pt3dadd(162360.000000,114828.000000,103825.000000,99.854927)}
{pt3dadd(162348.000000,114804.000000,103900.000000,99.854927)}
{pt3dadd(162312.000000,114816.000000,103975.000000,97.927452)}
{pt3dadd(162312.000000,114840.000000,104050.000000,98.867684)}
{pt3dadd(162336.000000,114828.000000,104075.000000,99.807916)}
{pt3dadd(162288.000000,114816.000000,104150.000000,96.843836)}
{pt3dadd(162264.000000,114804.000000,104225.000000,95.903604)}
{pt3dadd(162312.000000,114756.000000,104300.000000,96.843836)}
{pt3dadd(162312.000000,114732.000000,104350.000000,97.831079)}
{pt3dadd(162252.000000,114636.000000,104425.000000,99.854927)}
{pt3dadd(162288.000000,114504.000000,104500.000000,102.819007)}
{pt3dadd(162276.000000,114384.000000,104575.000000,109.214379)}
{pt3dadd(162276.000000,114348.000000,104625.000000,111.238227)}
{pt3dadd(162264.000000,114372.000000,104725.000000,121.136884)}
{pt3dadd(162228.000000,114324.000000,104825.000000,118.172804)}
{pt3dadd(162204.000000,114408.000000,104900.000000,114.313265)}
{pt3dadd(162216.000000,114204.000000,104900.000000,107.022434)}
{pt3dadd(162288.000000,113928.000000,104900.000000,102.310078)}
{pt3dadd(162408.000000,113796.000000,104950.000000,87.923463)}
{pt3dadd(162420.000000,113712.000000,105000.000000,87.923463)}
{pt3dadd(162456.000000,113652.000000,105050.000000,89.759154)}
{pt3dadd(162564.000000,113496.000000,105150.000000,91.594845)}
{pt3dadd(162684.000000,113424.000000,105225.000000,111.770373)}
{pt3dadd(162732.000000,113292.000000,105250.000000,132.758108)}
{pt3dadd(162804.000000,113088.000000,105275.000000,149.412410)}
{pt3dadd(162900.000000,112860.000000,105275.000000,179.561824)}
{pt3dadd(162912.000000,112920.000000,105350.000000,198.910436)}
{pt3dadd(162948.000000,112932.000000,105400.000000,193.840852)}
{pt3dadd(162984.000000,113004.000000,105525.000000,190.379382)}
{pt3dadd(163140.000000,112884.000000,105600.000000,192.152332)}
{pt3dadd(163308.000000,112752.000000,105600.000000,172.888818)}
{pt3dadd(163380.000000,112596.000000,105625.000000,150.039491)}
{pt3dadd(163440.000000,112464.000000,105625.000000,132.611113)}
{pt3dadd(163500.000000,112404.000000,105675.000000,115.084848)}
{pt3dadd(163572.000000,112368.000000,105700.000000,92.586886)}
{pt3dadd(163656.000000,112284.000000,105775.000000,76.690044)}
{pt3dadd(163836.000000,112212.000000,105825.000000,78.355068)}
{pt3dadd(163932.000000,112200.000000,105875.000000,78.961675)}
{pt3dadd(163920.000000,112152.000000,105900.000000,89.545845)}

{create adhoc34}
{access adhoc34}
{connect adhoc34(1), adhoc32(0)}
{nseg = 1}
{strdef color color = "White"}
{pt3dclear()}
{pt3dadd(163440.000000,115476.000000,102875.000000,261.944950)}
{pt3dadd(163272.000000,115584.000000,102650.000000,234.925823)}
{pt3dadd(163116.000000,115500.000000,102525.000000,219.142438)}
{pt3dadd(163008.000000,115476.000000,102425.000000,203.985328)}
{pt3dadd(162948.000000,115416.000000,102275.000000,188.629264)}
{pt3dadd(162888.000000,115392.000000,102150.000000,171.581120)}
{pt3dadd(162792.000000,115344.000000,102025.000000,158.947648)}
{pt3dadd(162720.000000,115320.000000,101900.000000,149.026326)}
{pt3dadd(162636.000000,115320.000000,101750.000000,142.425206)}
{pt3dadd(162552.000000,115296.000000,101600.000000,145.721840)}
{pt3dadd(162492.000000,115212.000000,101450.000000,157.180770)}
{pt3dadd(162396.000000,115116.000000,101300.000000,169.247700)}
{pt3dadd(162300.000000,115068.000000,101150.000000,177.294650)}

{create adhoc35}
{access adhoc35}
{connect adhoc35(1), adhoc34(0)}
{nseg = 1}
{strdef color color = "White"}
{pt3dclear()}
{pt3dadd(162300.000000,115068.000000,101150.000000,177.294650)}
{pt3dadd(162132.000000,114972.000000,101150.000000,137.751722)}
{pt3dadd(162048.000000,114828.000000,101150.000000,117.699806)}
{pt3dadd(161952.000000,114696.000000,101150.000000,101.045504)}
{pt3dadd(161928.000000,114564.000000,101150.000000,93.390132)}
{pt3dadd(161844.000000,114420.000000,101050.000000,91.462657)}
{pt3dadd(161808.000000,114312.000000,101050.000000,91.462657)}
{pt3dadd(161772.000000,114216.000000,101025.000000,94.023140)}
{pt3dadd(161712.000000,114108.000000,101050.000000,94.023140)}
{pt3dadd(161652.000000,113988.000000,101100.000000,94.023140)}
{pt3dadd(161640.000000,113868.000000,101100.000000,92.274864)}
{pt3dadd(161580.000000,113748.000000,101125.000000,88.940850)}
{pt3dadd(161532.000000,113604.000000,101125.000000,88.045391)}
{pt3dadd(161568.000000,113508.000000,101175.000000,87.149932)}
{pt3dadd(161592.000000,113388.000000,101225.000000,87.149932)}
{pt3dadd(161532.000000,113232.000000,101200.000000,89.838440)}
{pt3dadd(161508.000000,113124.000000,101200.000000,94.112686)}
{pt3dadd(161436.000000,113016.000000,101200.000000,95.948377)}
{pt3dadd(161484.000000,112932.000000,101225.000000,97.784068)}
{pt3dadd(161520.000000,112836.000000,101250.000000,97.784068)}
{pt3dadd(161520.000000,112740.000000,101250.000000,96.843836)}
{pt3dadd(161520.000000,112620.000000,101275.000000,94.155328)}
{pt3dadd(161484.000000,112512.000000,101275.000000,90.654613)}
{pt3dadd(161436.000000,112416.000000,101275.000000,88.818922)}
{pt3dadd(161376.000000,112284.000000,101275.000000,89.759154)}
{pt3dadd(161364.000000,112188.000000,101275.000000,88.863695)}
{pt3dadd(161352.000000,112056.000000,101275.000000,88.863695)}
{pt3dadd(161316.000000,111972.000000,101275.000000,88.863695)}
{pt3dadd(161292.000000,111864.000000,101150.000000,87.198671)}
{pt3dadd(161268.000000,111624.000000,101100.000000,84.510163)}
{pt3dadd(161268.000000,111456.000000,101075.000000,85.405622)}
{pt3dadd(161268.000000,111264.000000,100975.000000,90.117978)}
{pt3dadd(161268.000000,111048.000000,100900.000000,109.332763)}
{pt3dadd(161184.000000,110748.000000,100825.000000,130.320498)}
{pt3dadd(160980.000000,110400.000000,100825.000000,148.723076)}
{pt3dadd(160908.000000,110340.000000,100825.000000,159.090598)}
{pt3dadd(160872.000000,110148.000000,100825.000000,165.104890)}
{pt3dadd(160740.000000,109884.000000,100675.000000,153.645960)}
{pt3dadd(160668.000000,109764.000000,100625.000000,139.271222)}
{pt3dadd(160596.000000,109668.000000,100575.000000,126.669434)}
{pt3dadd(160428.000000,109488.000000,100575.000000,120.354426)}
{pt3dadd(160128.000000,109200.000000,100575.000000,114.340134)}
{pt3dadd(160008.000000,109128.000000,100600.000000,113.197276)}
{pt3dadd(159888.000000,109008.000000,100650.000000,112.108842)}
{pt3dadd(159756.000000,108888.000000,100650.000000,112.108842)}
{pt3dadd(159528.000000,108768.000000,100675.000000,124.710630)}
{pt3dadd(159324.000000,108648.000000,100675.000000,146.042474)}
{pt3dadd(159180.000000,108348.000000,100675.000000,180.944192)}
{pt3dadd(159012.000000,108252.000000,100675.000000,216.934344)}
{pt3dadd(158916.000000,108204.000000,100625.000000,241.595562)}
{pt3dadd(158772.000000,108000.000000,100500.000000,249.237184)}
{pt3dadd(158712.000000,107856.000000,100425.000000,228.993774)}
{pt3dadd(158616.000000,107772.000000,100350.000000,193.003622)}
{pt3dadd(158580.000000,107748.000000,100300.000000,154.989622)}
{pt3dadd(158508.000000,107508.000000,100300.000000,126.275890)}
{pt3dadd(158556.000000,107328.000000,100350.000000,100.231690)}
{pt3dadd(158652.000000,107148.000000,100350.000000,93.618693)}
{pt3dadd(158724.000000,106956.000000,100350.000000,88.094130)}
{pt3dadd(158700.000000,106836.000000,100425.000000,83.083188)}
{pt3dadd(158736.000000,106776.000000,100475.000000,92.061560)}
{pt3dadd(158724.000000,106740.000000,100525.000000,107.167504)}
{pt3dadd(158760.000000,106704.000000,100650.000000,126.382289)}
{pt3dadd(158760.000000,106548.000000,100725.000000,140.768904)}
{pt3dadd(158904.000000,106416.000000,100825.000000,153.817986)}
{pt3dadd(158916.000000,106296.000000,100900.000000,150.034986)}
{pt3dadd(158940.000000,106344.000000,101000.000000,136.677318)}
{pt3dadd(158904.000000,106308.000000,101050.000000,120.963248)}
{pt3dadd(158904.000000,106320.000000,101125.000000,110.077348)}
{pt3dadd(158964.000000,106368.000000,101150.000000,101.098976)}
{pt3dadd(159012.000000,106356.000000,101250.000000,95.903604)}
{pt3dadd(159084.000000,106332.000000,101300.000000,95.903604)}
{pt3dadd(159144.000000,106344.000000,101350.000000,95.903604)}
{pt3dadd(159204.000000,106356.000000,101425.000000,94.963372)}
{pt3dadd(159288.000000,106368.000000,101525.000000,93.215096)}
{pt3dadd(159264.000000,106356.000000,101600.000000,92.319637)}
{pt3dadd(159336.000000,106392.000000,101675.000000,90.571361)}
{pt3dadd(159360.000000,106368.000000,101775.000000,87.070646)}
{pt3dadd(159396.000000,106344.000000,101850.000000,85.322370)}
{pt3dadd(159408.000000,106344.000000,101925.000000,84.510163)}
{pt3dadd(159420.000000,106332.000000,102000.000000,82.845140)}
{pt3dadd(159384.000000,106284.000000,102150.000000,82.845140)}
{pt3dadd(159408.000000,106236.000000,102250.000000,83.657346)}
{pt3dadd(159420.000000,106176.000000,102400.000000,83.657346)}
{pt3dadd(159444.000000,106032.000000,102525.000000,83.657346)}
{pt3dadd(159432.000000,106056.000000,102600.000000,84.469553)}
{pt3dadd(159444.000000,105972.000000,102725.000000,83.657346)}
{pt3dadd(159444.000000,105936.000000,102750.000000,82.574404)}
{pt3dadd(159456.000000,105840.000000,102875.000000,81.220726)}

{create adhoc36}
{access adhoc36}
{connect adhoc36(1), adhoc34(0)}
{nseg = 1}
{strdef color color = "White"}
{pt3dclear()}
{pt3dadd(162300.000000,115068.000000,101150.000000,177.294650)}
{pt3dadd(162336.000000,115140.000000,101050.000000,144.702988)}
{pt3dadd(162360.000000,115200.000000,100975.000000,126.311513)}
{pt3dadd(162300.000000,115248.000000,100925.000000,108.761752)}
{pt3dadd(162336.000000,115284.000000,100825.000000,99.899700)}
{pt3dadd(162432.000000,115272.000000,100750.000000,96.223949)}
{pt3dadd(162444.000000,115320.000000,100650.000000,95.283717)}
{pt3dadd(162420.000000,115380.000000,100550.000000,92.595209)}
{pt3dadd(162540.000000,115440.000000,100425.000000,92.595209)}
{pt3dadd(162528.000000,115428.000000,100325.000000,87.882853)}
{pt3dadd(162600.000000,115452.000000,100200.000000,89.631129)}
{pt3dadd(162588.000000,115452.000000,100100.000000,87.882853)}
{pt3dadd(162636.000000,115452.000000,100000.000000,88.735670)}
{pt3dadd(162672.000000,115476.000000,99875.000000,92.595209)}
{pt3dadd(162684.000000,115536.000000,99775.000000,95.283717)}
{pt3dadd(162732.000000,115572.000000,99650.000000,96.223949)}
{pt3dadd(162708.000000,115632.000000,99550.000000,97.972225)}
{pt3dadd(162756.000000,115716.000000,99450.000000,97.119408)}
{pt3dadd(162696.000000,115776.000000,99375.000000,92.407052)}
{pt3dadd(162588.000000,115812.000000,99275.000000,89.718544)}
{pt3dadd(162540.000000,115848.000000,99175.000000,88.778312)}
{pt3dadd(162528.000000,115860.000000,99100.000000,87.030036)}
{pt3dadd(162408.000000,115956.000000,98975.000000,87.882853)}
{pt3dadd(162360.000000,115908.000000,98875.000000,92.595209)}
{pt3dadd(162228.000000,116016.000000,98800.000000,96.270960)}
{pt3dadd(162120.000000,116088.000000,98725.000000,98.198435)}
{pt3dadd(161976.000000,116148.000000,98625.000000,103.999225)}
{pt3dadd(161868.000000,116232.000000,98575.000000,116.720816)}
{pt3dadd(161544.000000,116376.000000,98500.000000,128.722518)}
{pt3dadd(161124.000000,116712.000000,98450.000000,151.090967)}
{pt3dadd(160968.000000,116844.000000,98325.000000,160.989624)}
{pt3dadd(160836.000000,116952.000000,98225.000000,179.180626)}
{pt3dadd(160656.000000,117108.000000,98150.000000,187.643338)}
{pt3dadd(160596.000000,117120.000000,98075.000000,201.391288)}
{pt3dadd(160584.000000,117144.000000,98000.000000,205.809096)}
{pt3dadd(160440.000000,117240.000000,97850.000000,222.696696)}
{pt3dadd(160320.000000,117300.000000,97750.000000,224.749104)}
{pt3dadd(160200.000000,117360.000000,97625.000000,224.749104)}
{pt3dadd(160140.000000,117468.000000,97400.000000,214.462624)}
{pt3dadd(160056.000000,117576.000000,97275.000000,206.037736)}
{pt3dadd(160044.000000,117576.000000,97200.000000,199.567520)}
{pt3dadd(160020.000000,117600.000000,97075.000000,190.237378)}
{pt3dadd(159972.000000,117624.000000,96950.000000,201.038180)}
{pt3dadd(159828.000000,117816.000000,96925.000000,202.899772)}
{pt3dadd(159588.000000,118164.000000,96925.000000,204.596927)}
{pt3dadd(159672.000000,117960.000000,96725.000000,195.467360)}

{create adhoc37}
{access adhoc37}
{connect adhoc37(1), adhoc36(0)}
{nseg = 1}
{strdef color color = "White"}
{pt3dclear()}
{pt3dadd(159672.000000,117960.000000,96725.000000,195.467360)}
{pt3dadd(159648.000000,117900.000000,96675.000000,155.560787)}
{pt3dadd(159564.000000,117852.000000,96625.000000,137.962322)}
{pt3dadd(159456.000000,117816.000000,96575.000000,118.613710)}
{pt3dadd(159336.000000,117768.000000,96575.000000,109.210062)}
{pt3dadd(159336.000000,117744.000000,96500.000000,98.483414)}
{pt3dadd(159300.000000,117768.000000,96400.000000,95.519334)}
{pt3dadd(159300.000000,117768.000000,96325.000000,89.718544)}
{pt3dadd(159108.000000,117828.000000,96200.000000,88.778312)}
{pt3dadd(158904.000000,117828.000000,96125.000000,88.778312)}
{pt3dadd(158712.000000,117864.000000,96050.000000,87.966105)}
{pt3dadd(158496.000000,117888.000000,95975.000000,87.070646)}
{pt3dadd(158328.000000,117936.000000,95900.000000,88.818922)}
{pt3dadd(158244.000000,117972.000000,95800.000000,84.748212)}
{pt3dadd(158220.000000,117912.000000,95725.000000,85.746192)}
{pt3dadd(158196.000000,117888.000000,95675.000000,73.669590)}

{create adhoc38}
{access adhoc38}
{connect adhoc38(1), adhoc36(0)}
{nseg = 1}
{strdef color color = "White"}
{pt3dclear()}
{pt3dadd(159672.000000,117960.000000,96725.000000,195.467360)}
{pt3dadd(159552.000000,118308.000000,97000.000000,187.173187)}
{pt3dadd(159492.000000,118524.000000,97125.000000,164.211068)}
{pt3dadd(159492.000000,118620.000000,97150.000000,151.577596)}
{pt3dadd(159456.000000,118764.000000,97175.000000,136.989452)}
{pt3dadd(159480.000000,118908.000000,97250.000000,132.610156)}
{pt3dadd(159420.000000,119076.000000,97350.000000,121.179963)}
{pt3dadd(159492.000000,119184.000000,97425.000000,121.179963)}
{pt3dadd(159396.000000,119328.000000,97500.000000,114.464823)}
{pt3dadd(159408.000000,119484.000000,97550.000000,109.773531)}
{pt3dadd(159456.000000,119580.000000,97600.000000,104.847673)}
{pt3dadd(159444.000000,119748.000000,97700.000000,104.847673)}
{pt3dadd(159444.000000,119916.000000,97750.000000,110.302813)}
{pt3dadd(159432.000000,120168.000000,97825.000000,113.415095)}
{pt3dadd(159348.000000,120372.000000,97925.000000,113.415095)}
{pt3dadd(159372.000000,120456.000000,97975.000000,110.302813)}
{pt3dadd(159396.000000,120540.000000,98050.000000,109.315570)}
{pt3dadd(159384.000000,120684.000000,98125.000000,102.024739)}
{pt3dadd(159396.000000,120864.000000,98150.000000,97.076766)}
{pt3dadd(159420.000000,121068.000000,98200.000000,91.552203)}
{pt3dadd(159360.000000,121080.000000,98225.000000,89.716512)}
{pt3dadd(159372.000000,121236.000000,98325.000000,93.971652)}
{pt3dadd(159420.000000,121524.000000,98400.000000,117.110627)}
{pt3dadd(159492.000000,121788.000000,98450.000000,159.848258)}
{pt3dadd(159636.000000,122112.000000,98600.000000,198.612553)}
{pt3dadd(159864.000000,122484.000000,98600.000000,221.751528)}
{pt3dadd(159912.000000,122688.000000,98700.000000,228.382288)}
{pt3dadd(159996.000000,122856.000000,98775.000000,217.964904)}
{pt3dadd(159948.000000,122736.000000,98850.000000,177.062964)}
{pt3dadd(160092.000000,122952.000000,98750.000000,139.110876)}
{pt3dadd(160272.000000,123024.000000,98800.000000,115.119084)}
{pt3dadd(160440.000000,123084.000000,98900.000000,103.292952)}
{pt3dadd(160560.000000,123168.000000,99000.000000,90.571361)}
{pt3dadd(160560.000000,123204.000000,98975.000000,87.882853)}
{pt3dadd(160620.000000,123264.000000,98975.000000,88.735670)}
{pt3dadd(160632.000000,123180.000000,99125.000000,89.588487)}
{pt3dadd(160632.000000,123228.000000,99200.000000,87.028004)}
{pt3dadd(160644.000000,123288.000000,99300.000000,85.362980)}
{pt3dadd(160716.000000,123300.000000,99350.000000,86.215797)}
{pt3dadd(160752.000000,123348.000000,99450.000000,87.111256)}
{pt3dadd(160764.000000,123372.000000,99575.000000,85.446233)}
{pt3dadd(160872.000000,123360.000000,99625.000000,88.946947)}
{pt3dadd(161220.000000,123180.000000,99700.000000,93.434905)}
{pt3dadd(160872.000000,123384.000000,99725.000000,93.434905)}
{pt3dadd(160836.000000,123372.000000,99825.000000,94.375137)}
{pt3dadd(160884.000000,123396.000000,99900.000000,95.187344)}
{pt3dadd(160944.000000,123432.000000,100000.000000,91.686629)}
{pt3dadd(160992.000000,123348.000000,100100.000000,90.699386)}
{pt3dadd(161028.000000,123396.000000,100200.000000,90.699386)}
{pt3dadd(161148.000000,123384.000000,100275.000000,88.863695)}
{pt3dadd(161220.000000,123360.000000,100350.000000,91.552203)}
{pt3dadd(161280.000000,123312.000000,100425.000000,93.217227)}
{pt3dadd(161376.000000,123312.000000,100500.000000,92.276995)}
{pt3dadd(161460.000000,123312.000000,100550.000000,91.424178)}
{pt3dadd(161568.000000,123324.000000,100650.000000,90.571361)}
{pt3dadd(161784.000000,123264.000000,100725.000000,89.631129)}
{pt3dadd(161880.000000,123252.000000,100800.000000,88.195553)}
{pt3dadd(161964.000000,123300.000000,100850.000000,94.023140)}

{create adhoc39}
{access adhoc39}
{connect adhoc39(1), adhoc31(0)}
{nseg = 1}
{strdef color color = "White"}
{pt3dclear()}
{pt3dadd(186732.000000,139320.000000,93350.000000,138.915000)}
{pt3dadd(186696.000000,139368.000000,93225.000000,151.209267)}
{pt3dadd(186672.000000,139176.000000,93125.000000,147.353112)}
{pt3dadd(186720.000000,139128.000000,93025.000000,141.338820)}
{pt3dadd(186756.000000,139056.000000,92900.000000,127.313270)}
{pt3dadd(186792.000000,139020.000000,92800.000000,117.885980)}
{pt3dadd(186912.000000,138996.000000,92700.000000,103.860430)}
{pt3dadd(186936.000000,138936.000000,92575.000000,99.807916)}
{pt3dadd(186960.000000,138864.000000,92475.000000,95.948377)}
{pt3dadd(186972.000000,138804.000000,92375.000000,95.008145)}
{pt3dadd(187104.000000,138696.000000,92300.000000,92.319637)}
{pt3dadd(187248.000000,138600.000000,92200.000000,90.483946)}
{pt3dadd(187236.000000,138528.000000,92150.000000,92.411421)}
{pt3dadd(187440.000000,138468.000000,92075.000000,95.234355)}
{pt3dadd(187620.000000,138480.000000,91975.000000,98.198435)}
{pt3dadd(187740.000000,138456.000000,91925.000000,100.886943)}
{pt3dadd(187848.000000,138504.000000,91825.000000,102.722634)}
{pt3dadd(187944.000000,138492.000000,91725.000000,103.759239)}
{pt3dadd(188088.000000,138600.000000,91725.000000,103.759239)}
{pt3dadd(188364.000000,138744.000000,91725.000000,103.759239)}
{pt3dadd(188580.000000,138876.000000,91725.000000,100.258524)}
{pt3dadd(188748.000000,138960.000000,91725.000000,98.422833)}
{pt3dadd(188868.000000,138984.000000,91650.000000,94.563294)}
{pt3dadd(189120.000000,138984.000000,91575.000000,91.740360)}
{pt3dadd(189276.000000,138960.000000,91575.000000,87.028004)}
{pt3dadd(189504.000000,138912.000000,91575.000000,88.693028)}
{pt3dadd(189408.000000,138924.000000,91525.000000,87.840211)}
{pt3dadd(189312.000000,138900.000000,91475.000000,96.391042)}
{pt3dadd(189684.000000,138900.000000,91425.000000,107.654023)}
{pt3dadd(189924.000000,138828.000000,91375.000000,122.759967)}
{pt3dadd(190140.000000,138804.000000,91300.000000,128.850798)}
{pt3dadd(190320.000000,138780.000000,91225.000000,135.794446)}
{pt3dadd(190428.000000,138756.000000,91125.000000,133.334446)}
{pt3dadd(190572.000000,138720.000000,91100.000000,128.162296)}
{pt3dadd(190644.000000,138744.000000,91125.000000,120.000000)}
{pt3dadd(190740.000000,138768.000000,90975.000000,122.460000)}
{pt3dadd(190920.000000,138840.000000,90950.000000,126.243000)}
{pt3dadd(191040.000000,138768.000000,90850.000000,128.703000)}
{pt3dadd(191100.000000,138744.000000,90750.000000,132.486000)}
{pt3dadd(191220.000000,138780.000000,90650.000000,132.486000)}
{pt3dadd(191352.000000,138780.000000,90575.000000,130.026000)}
{pt3dadd(191472.000000,138684.000000,90500.000000,126.243000)}
{pt3dadd(191676.000000,138648.000000,90500.000000,123.783000)}
{pt3dadd(191976.000000,138636.000000,90500.000000,120.000000)}
{pt3dadd(192144.000000,138708.000000,90450.000000,120.000000)}
{pt3dadd(192396.000000,138732.000000,90450.000000,117.768708)}
{pt3dadd(192528.000000,138744.000000,90450.000000,114.500811)}
{pt3dadd(192636.000000,138768.000000,90400.000000,112.269519)}
{pt3dadd(192876.000000,138876.000000,90350.000000,108.014379)}
{pt3dadd(193068.000000,138996.000000,90300.000000,103.759239)}
{pt3dadd(193200.000000,139044.000000,90250.000000,105.990531)}
{pt3dadd(193368.000000,139140.000000,90250.000000,108.115570)}
{pt3dadd(193584.000000,139188.000000,90200.000000,109.204004)}
{pt3dadd(193764.000000,139344.000000,90150.000000,108.263772)}
{pt3dadd(193968.000000,139416.000000,90150.000000,110.287620)}
{pt3dadd(194208.000000,139512.000000,90150.000000,108.056328)}
{pt3dadd(194172.000000,139536.000000,90175.000000,106.967894)}
{pt3dadd(194268.000000,139620.000000,90200.000000,102.915380)}
{pt3dadd(194448.000000,139776.000000,90200.000000,103.855612)}
{pt3dadd(194664.000000,139896.000000,90200.000000,101.831764)}
{pt3dadd(194856.000000,140004.000000,90250.000000,107.846056)}
{pt3dadd(195132.000000,140196.000000,90300.000000,112.537348)}
{pt3dadd(195300.000000,140400.000000,90300.000000,116.589862)}
{pt3dadd(195504.000000,140664.000000,90300.000000,116.589862)}
{pt3dadd(195660.000000,140916.000000,90275.000000,117.577105)}
{pt3dadd(195924.000000,141120.000000,90275.000000,110.526208)}
{pt3dadd(196140.000000,141264.000000,90275.000000,105.834916)}
{pt3dadd(196416.000000,141408.000000,90225.000000,102.722634)}
{pt3dadd(196596.000000,141492.000000,90225.000000,102.722634)}
{pt3dadd(196656.000000,141564.000000,90175.000000,99.899700)}
{pt3dadd(196932.000000,141720.000000,90100.000000,97.972225)}
{pt3dadd(197124.000000,141852.000000,90100.000000,95.008145)}
{pt3dadd(197388.000000,142020.000000,90150.000000,93.172454)}
{pt3dadd(197496.000000,142104.000000,90200.000000,88.161512)}
{pt3dadd(197676.000000,142248.000000,90275.000000,87.308695)}
{pt3dadd(197808.000000,142332.000000,90375.000000,83.974681)}
{pt3dadd(197988.000000,142572.000000,90450.000000,82.226405)}
{pt3dadd(198180.000000,142764.000000,90450.000000,82.226405)}
{pt3dadd(198216.000000,142824.000000,90500.000000,87.237347)}
{pt3dadd(198252.000000,142812.000000,90575.000000,87.237347)}
{pt3dadd(198312.000000,142884.000000,90550.000000,88.823085)}
{pt3dadd(198360.000000,143004.000000,90575.000000,90.571361)}
{pt3dadd(198408.000000,143028.000000,90600.000000,88.195553)}
{pt3dadd(198468.000000,143076.000000,90650.000000,94.023140)}

{create adhoc40}
{access adhoc40}
{connect adhoc40(1), adhoc20(0)}
{nseg = 1}
{strdef color color = "White"}
{pt3dclear()}
{pt3dadd(172092.000000,123012.000000,71425.000000,448.014770)}
{pt3dadd(171996.000000,122688.000000,71425.000000,378.499960)}
{pt3dadd(172044.000000,122352.000000,71425.000000,291.501146)}
{pt3dadd(172104.000000,121980.000000,71425.000000,232.528952)}
{pt3dadd(172152.000000,121692.000000,71425.000000,159.433100)}
{pt3dadd(172116.000000,121476.000000,71425.000000,156.293450)}
{pt3dadd(172128.000000,121368.000000,71275.000000,156.293450)}
{pt3dadd(172068.000000,121260.000000,71250.000000,151.695190)}
{pt3dadd(172080.000000,121152.000000,71225.000000,150.236580)}
{pt3dadd(172056.000000,121008.000000,71175.000000,148.777970)}
{pt3dadd(172080.000000,120900.000000,71200.000000,145.930210)}
{pt3dadd(171984.000000,120756.000000,71225.000000,144.471600)}
{pt3dadd(171900.000000,120624.000000,71225.000000,145.930210)}
{pt3dadd(171888.000000,120504.000000,71225.000000,147.388820)}
{pt3dadd(171744.000000,120384.000000,71250.000000,151.987080)}
{pt3dadd(171672.000000,120276.000000,71275.000000,156.366376)}
{pt3dadd(171660.000000,120156.000000,71300.000000,164.426106)}
{pt3dadd(171624.000000,120012.000000,71300.000000,172.888818)}
{pt3dadd(171480.000000,119904.000000,71275.000000,179.489938)}
{pt3dadd(171408.000000,119772.000000,71225.000000,182.951408)}
{pt3dadd(171324.000000,119652.000000,71200.000000,189.882584)}
{pt3dadd(171192.000000,119520.000000,71200.000000,188.109634)}
{pt3dadd(171084.000000,119388.000000,71200.000000,186.248042)}
{pt3dadd(171096.000000,119280.000000,71125.000000,186.248042)}
{pt3dadd(170952.000000,119172.000000,71100.000000,190.064306)}
{pt3dadd(170856.000000,119064.000000,71025.000000,194.071386)}
{pt3dadd(170700.000000,118932.000000,70975.000000,206.130816)}
{pt3dadd(170544.000000,118812.000000,70950.000000,214.154516)}
{pt3dadd(170520.000000,118692.000000,70900.000000,220.023188)}
{pt3dadd(170424.000000,118548.000000,70850.000000,216.206924)}
{pt3dadd(170364.000000,118440.000000,70800.000000,216.206924)}
{pt3dadd(170340.000000,118296.000000,70675.000000,207.782036)}
{pt3dadd(170256.000000,118224.000000,70625.000000,201.619928)}
{pt3dadd(170232.000000,118104.000000,70500.000000,199.567520)}
{pt3dadd(170208.000000,117972.000000,70350.000000,203.383784)}
{pt3dadd(170124.000000,117876.000000,70225.000000,207.801592)}
{pt3dadd(170064.000000,117744.000000,70125.000000,209.756264)}
{pt3dadd(170028.000000,117600.000000,70150.000000,209.756264)}
{pt3dadd(169968.000000,117456.000000,70025.000000,205.940000)}
{pt3dadd(169896.000000,117324.000000,69925.000000,202.123736)}
{pt3dadd(169884.000000,117180.000000,69825.000000,190.064306)}
{pt3dadd(169860.000000,117036.000000,69775.000000,186.248042)}
{pt3dadd(169836.000000,116904.000000,69700.000000,179.316866)}
{pt3dadd(169800.000000,116748.000000,69700.000000,181.178458)}
{pt3dadd(169884.000000,116592.000000,69600.000000,183.040050)}
{pt3dadd(169824.000000,116460.000000,69700.000000,190.681672)}
{pt3dadd(169848.000000,116304.000000,69650.000000,203.344066)}
{pt3dadd(169848.000000,116172.000000,69575.000000,223.570760)}
{pt3dadd(169896.000000,116028.000000,69475.000000,242.236148)}
{pt3dadd(169956.000000,115920.000000,69500.000000,276.859248)}
{pt3dadd(169932.000000,115764.000000,69400.000000,294.405496)}
{pt3dadd(169992.000000,115608.000000,69300.000000,308.190366)}
{pt3dadd(170040.000000,115416.000000,69200.000000,319.480520)}
{pt3dadd(169980.000000,115248.000000,69125.000000,311.615934)}
{pt3dadd(169968.000000,115080.000000,69100.000000,295.420937)}
{pt3dadd(169968.000000,114924.000000,69075.000000,249.471370)}

{create adhoc41}
{access adhoc41}
{connect adhoc41(1), adhoc40(0)}
{nseg = 1}
{strdef color color = "White"}
{pt3dclear()}
{pt3dadd(169968.000000,114924.000000,69075.000000,249.471370)}
{pt3dadd(169980.000000,114924.000000,69300.000000,188.312910)}
{pt3dadd(169956.000000,114924.000000,69550.000000,149.788958)}
{pt3dadd(169932.000000,114840.000000,69650.000000,118.699312)}
{pt3dadd(169896.000000,114744.000000,69675.000000,99.350700)}
{pt3dadd(169908.000000,114636.000000,69725.000000,95.095560)}
{pt3dadd(169872.000000,114492.000000,69725.000000,97.784068)}
{pt3dadd(169848.000000,114360.000000,69750.000000,96.843836)}
{pt3dadd(169896.000000,114252.000000,69825.000000,96.843836)}
{pt3dadd(169908.000000,114120.000000,69825.000000,95.903604)}
{pt3dadd(169896.000000,114000.000000,69850.000000,94.023140)}
{pt3dadd(169884.000000,113904.000000,69900.000000,94.023140)}

{create adhoc42}
{access adhoc42}
{connect adhoc42(1), adhoc41(0)}
{nseg = 1}
{strdef color color = "White"}
{pt3dclear()}
{pt3dadd(169884.000000,113904.000000,69900.000000,94.023140)}
{pt3dadd(169860.000000,113844.000000,69950.000000,100.448057)}
{pt3dadd(169848.000000,113724.000000,70000.000000,99.946711)}
{pt3dadd(169800.000000,113568.000000,70075.000000,98.198435)}
{pt3dadd(169788.000000,113328.000000,70150.000000,94.522684)}
{pt3dadd(169752.000000,113244.000000,70200.000000,92.595209)}
{pt3dadd(169704.000000,113112.000000,70275.000000,91.558604)}
{pt3dadd(169632.000000,112956.000000,70325.000000,94.381538)}
{pt3dadd(169584.000000,112812.000000,70400.000000,116.418658)}
{pt3dadd(169584.000000,112704.000000,70475.000000,146.880666)}
{pt3dadd(169488.000000,112416.000000,70500.000000,177.970312)}
{pt3dadd(169416.000000,112152.000000,70550.000000,198.286353)}
{pt3dadd(169380.000000,112068.000000,70625.000000,214.786130)}
{pt3dadd(169356.000000,112044.000000,70725.000000,211.151588)}
{pt3dadd(169188.000000,111936.000000,70850.000000,190.093228)}
{pt3dadd(169152.000000,111840.000000,70950.000000,164.198954)}
{pt3dadd(169116.000000,111804.000000,71025.000000,144.919518)}
{pt3dadd(169032.000000,111708.000000,71125.000000,131.687638)}
{pt3dadd(168996.000000,111612.000000,71225.000000,119.085850)}
{pt3dadd(168960.000000,111576.000000,71325.000000,114.394558)}
{pt3dadd(168924.000000,111564.000000,71450.000000,110.139418)}
{pt3dadd(168852.000000,111492.000000,71450.000000,107.175338)}
{pt3dadd(168756.000000,111372.000000,71500.000000,102.920198)}
{pt3dadd(168684.000000,111276.000000,71675.000000,99.807916)}
{pt3dadd(168588.000000,111192.000000,71775.000000,97.784068)}
{pt3dadd(168552.000000,111168.000000,71850.000000,97.784068)}
{pt3dadd(168528.000000,110976.000000,72000.000000,98.724300)}
{pt3dadd(168468.000000,110808.000000,72100.000000,98.724300)}
{pt3dadd(168444.000000,110676.000000,72125.000000,98.724300)}
{pt3dadd(168432.000000,110544.000000,72100.000000,104.179440)}
{pt3dadd(168384.000000,110388.000000,72075.000000,110.894580)}
{pt3dadd(168336.000000,110280.000000,72100.000000,120.321870)}
{pt3dadd(168312.000000,110124.000000,72100.000000,131.207770)}
{pt3dadd(168276.000000,109980.000000,72050.000000,142.093670)}
{pt3dadd(168348.000000,109716.000000,72050.000000,149.055966)}
{pt3dadd(168408.000000,109500.000000,72000.000000,153.226726)}
{pt3dadd(168456.000000,109260.000000,71925.000000,145.823284)}
{pt3dadd(168528.000000,108972.000000,71925.000000,134.937384)}
{pt3dadd(168624.000000,108912.000000,72000.000000,125.038727)}
{pt3dadd(168696.000000,108864.000000,72075.000000,112.621291)}
{pt3dadd(168696.000000,108840.000000,72175.000000,101.735391)}
{pt3dadd(168780.000000,108804.000000,72250.000000,99.711543)}
{pt3dadd(168804.000000,108828.000000,72375.000000,99.711543)}
{pt3dadd(168900.000000,108828.000000,72475.000000,97.784068)}
{pt3dadd(169008.000000,108864.000000,72600.000000,96.843836)}
{pt3dadd(169140.000000,108816.000000,72700.000000,97.831079)}
{pt3dadd(169224.000000,108768.000000,72800.000000,99.854927)}
{pt3dadd(169344.000000,108744.000000,72925.000000,100.842170)}
{pt3dadd(169548.000000,108648.000000,73025.000000,103.806250)}
{pt3dadd(169752.000000,108648.000000,73125.000000,107.858764)}
{pt3dadd(169836.000000,108648.000000,73225.000000,107.858764)}
{pt3dadd(169944.000000,108636.000000,73325.000000,105.834916)}
{pt3dadd(170028.000000,108624.000000,73425.000000,104.847673)}
{pt3dadd(170124.000000,108612.000000,73550.000000,100.135317)}
{pt3dadd(170136.000000,108636.000000,73650.000000,94.334527)}
{pt3dadd(170280.000000,108576.000000,73750.000000,94.334527)}
{pt3dadd(170436.000000,108540.000000,73850.000000,92.498836)}
{pt3dadd(170520.000000,108528.000000,73950.000000,90.663145)}
{pt3dadd(170676.000000,108576.000000,74050.000000,96.463935)}
{pt3dadd(170736.000000,108612.000000,74125.000000,100.139686)}
{pt3dadd(170724.000000,108564.000000,74175.000000,124.663163)}
{pt3dadd(170652.000000,108600.000000,74275.000000,145.847466)}
{pt3dadd(170712.000000,108468.000000,74400.000000,171.038849)}
{pt3dadd(170724.000000,108432.000000,74575.000000,187.275179)}
{pt3dadd(170748.000000,108444.000000,74750.000000,193.003076)}
{pt3dadd(170808.000000,108456.000000,74950.000000,172.947496)}
{pt3dadd(170844.000000,108396.000000,75150.000000,163.026174)}
{pt3dadd(170784.000000,108228.000000,75150.000000,152.087918)}
{pt3dadd(170724.000000,108132.000000,75175.000000,145.156742)}
{pt3dadd(170784.000000,107940.000000,75175.000000,150.859038)}
{pt3dadd(170844.000000,107784.000000,75175.000000,156.289798)}
{pt3dadd(170964.000000,107628.000000,75175.000000,157.748408)}
{pt3dadd(171048.000000,107520.000000,75175.000000,154.758262)}
{pt3dadd(171144.000000,107388.000000,75175.000000,150.722783)}
{pt3dadd(171228.000000,107232.000000,75175.000000,145.860750)}

{create adhoc43}
{access adhoc43}
{connect adhoc43(1), adhoc41(0)}
{nseg = 1}
{strdef color color = "White"}
{pt3dclear()}
{pt3dadd(169884.000000,113904.000000,69900.000000,94.023140)}
{pt3dadd(170040.000000,113856.000000,69900.000000,100.530327)}
{pt3dadd(170112.000000,113808.000000,69900.000000,96.136534)}
{pt3dadd(170208.000000,113796.000000,69950.000000,95.241075)}
{pt3dadd(170304.000000,113748.000000,70000.000000,91.381536)}
{pt3dadd(170436.000000,113604.000000,70000.000000,90.441304)}
{pt3dadd(170472.000000,113544.000000,70000.000000,91.038277)}
{pt3dadd(170544.000000,113508.000000,70075.000000,94.023140)}

{create adhoc44}
{access adhoc44}
{connect adhoc44(1), adhoc40(0)}
{nseg = 1}
{strdef color color = "White"}
{pt3dclear()}
{pt3dadd(169968.000000,114924.000000,69075.000000,249.471370)}
{pt3dadd(169884.000000,114972.000000,68900.000000,246.288257)}
{pt3dadd(169872.000000,114840.000000,68825.000000,219.451858)}
{pt3dadd(169824.000000,114732.000000,68725.000000,198.729734)}
{pt3dadd(169836.000000,114576.000000,68625.000000,175.314814)}
{pt3dadd(169848.000000,114420.000000,68500.000000,173.541864)}
{pt3dadd(169836.000000,114240.000000,68400.000000,171.587192)}
{pt3dadd(169896.000000,114072.000000,68325.000000,168.739432)}
{pt3dadd(169896.000000,114024.000000,68225.000000,176.799162)}
{pt3dadd(169932.000000,113832.000000,68125.000000,161.335990)}
{pt3dadd(169968.000000,113724.000000,68050.000000,159.647470)}
{pt3dadd(170088.000000,113628.000000,67975.000000,159.647470)}
{pt3dadd(170220.000000,113448.000000,67900.000000,172.912614)}
{pt3dadd(170328.000000,113304.000000,67800.000000,172.912614)}
{pt3dadd(170460.000000,113148.000000,67700.000000,194.244458)}
{pt3dadd(170520.000000,112992.000000,67625.000000,189.646198)}
{pt3dadd(170580.000000,112800.000000,67500.000000,181.183486)}
{pt3dadd(170640.000000,112464.000000,67425.000000,173.905752)}
{pt3dadd(170676.000000,112284.000000,67350.000000,167.304632)}
{pt3dadd(170724.000000,112164.000000,67275.000000,154.834840)}
{pt3dadd(170784.000000,111936.000000,67175.000000,156.293450)}
{pt3dadd(170844.000000,111768.000000,67100.000000,154.834840)}
{pt3dadd(170832.000000,111720.000000,67025.000000,153.226726)}
{pt3dadd(170832.000000,111588.000000,66950.000000,153.226726)}
{pt3dadd(170856.000000,111444.000000,66900.000000,153.226726)}
{pt3dadd(170844.000000,111264.000000,66750.000000,154.758262)}
{pt3dadd(170856.000000,111132.000000,66650.000000,152.046112)}
{pt3dadd(170820.000000,111048.000000,66600.000000,146.343816)}
{pt3dadd(170748.000000,110940.000000,66525.000000,142.173056)}
{pt3dadd(170724.000000,110892.000000,66450.000000,145.312706)}
{pt3dadd(170616.000000,110748.000000,66375.000000,156.250962)}
{pt3dadd(170532.000000,110604.000000,66325.000000,172.891514)}
{pt3dadd(170460.000000,110484.000000,66275.000000,193.949874)}
{pt3dadd(170436.000000,110376.000000,66225.000000,219.878864)}
{pt3dadd(170400.000000,110220.000000,66225.000000,236.002728)}
{pt3dadd(170304.000000,110052.000000,66200.000000,247.910616)}
{pt3dadd(170376.000000,109944.000000,66175.000000,254.704338)}
{pt3dadd(170436.000000,109848.000000,66150.000000,250.286530)}
{pt3dadd(170424.000000,109728.000000,66150.000000,252.905980)}
{pt3dadd(170484.000000,109488.000000,66150.000000,263.658506)}
{pt3dadd(170556.000000,109188.000000,66150.000000,261.039056)}
{pt3dadd(170568.000000,108912.000000,66150.000000,258.663142)}
{pt3dadd(170124.000000,108912.000000,66000.000000,256.610734)}
{pt3dadd(170076.000000,108840.000000,65925.000000,242.650438)}
{pt3dadd(169872.000000,108504.000000,65875.000000,219.235518)}
{pt3dadd(169740.000000,108264.000000,65875.000000,199.008824)}
{pt3dadd(169680.000000,107928.000000,65800.000000,182.121224)}
{pt3dadd(169536.000000,107556.000000,65800.000000,174.843490)}
{pt3dadd(169344.000000,107448.000000,65800.000000,161.578346)}
{pt3dadd(169164.000000,107268.000000,65800.000000,152.129466)}
{pt3dadd(169020.000000,107016.000000,65800.000000,149.139320)}
{pt3dadd(168984.000000,106692.000000,65800.000000,147.680710)}
{pt3dadd(168972.000000,106452.000000,65800.000000,144.541060)}
{pt3dadd(168900.000000,106344.000000,65775.000000,148.920356)}
{pt3dadd(168924.000000,106272.000000,65750.000000,154.907766)}
{pt3dadd(168972.000000,106164.000000,65700.000000,157.897912)}
{pt3dadd(168972.000000,106068.000000,65675.000000,151.582904)}
{pt3dadd(169032.000000,105948.000000,65675.000000,140.697004)}
{pt3dadd(169212.000000,105924.000000,65625.000000,128.279568)}
{pt3dadd(169320.000000,105840.000000,65625.000000,114.254018)}
{pt3dadd(169476.000000,105684.000000,65625.000000,106.091722)}
{pt3dadd(169584.000000,105612.000000,65500.000000,105.816200)}
{pt3dadd(169752.000000,105528.000000,65425.000000,120.000000)}

{create adhoc45}
{access adhoc45}
{connect adhoc45(1), adhoc44(0)}
{nseg = 1}
{strdef color color = "White"}
{pt3dclear()}
{pt3dadd(169752.000000,105528.000000,65425.000000,120.000000)}
{pt3dadd(169884.000000,105588.000000,65350.000000,116.190473)}
{pt3dadd(170016.000000,105636.000000,65325.000000,112.215095)}
{pt3dadd(170088.000000,105636.000000,65275.000000,107.959955)}
{pt3dadd(170220.000000,105684.000000,65225.000000,103.907441)}
{pt3dadd(170268.000000,105720.000000,65200.000000,101.782402)}
{pt3dadd(170292.000000,105768.000000,65150.000000,101.782402)}
{pt3dadd(170376.000000,105828.000000,65050.000000,98.818322)}
{pt3dadd(170460.000000,105912.000000,65025.000000,96.129814)}
{pt3dadd(170604.000000,106044.000000,64975.000000,96.129814)}
{pt3dadd(170748.000000,106152.000000,64900.000000,91.641856)}
{pt3dadd(170688.000000,106116.000000,64850.000000,87.966105)}
{pt3dadd(170688.000000,106140.000000,64750.000000,85.405622)}
{pt3dadd(170712.000000,106344.000000,64650.000000,85.405622)}
{pt3dadd(170820.000000,106440.000000,64525.000000,83.657346)}
{pt3dadd(170856.000000,106512.000000,64500.000000,85.322370)}
{pt3dadd(170916.000000,106500.000000,64400.000000,88.998121)}
{pt3dadd(170928.000000,106596.000000,64275.000000,92.498836)}
{pt3dadd(170832.000000,106728.000000,64175.000000,95.187344)}
{pt3dadd(170748.000000,106896.000000,64050.000000,96.935620)}
{pt3dadd(170616.000000,106968.000000,63900.000000,98.771311)}
{pt3dadd(170496.000000,107124.000000,63775.000000,99.807916)}
{pt3dadd(170376.000000,107328.000000,63775.000000,113.833466)}
{pt3dadd(170184.000000,107556.000000,63775.000000,121.871606)}
{pt3dadd(169968.000000,107688.000000,63700.000000,136.837388)}
{pt3dadd(169884.000000,107736.000000,63575.000000,158.873033)}
{pt3dadd(169668.000000,107724.000000,63425.000000,168.852050)}

{create adhoc46}
{access adhoc46}
{connect adhoc46(1), adhoc44(0)}
{nseg = 1}
{strdef color color = "White"}
{pt3dclear()}
{pt3dadd(169752.000000,105528.000000,65425.000000,120.000000)}
{pt3dadd(169740.000000,105336.000000,65275.000000,117.008100)}
{pt3dadd(169704.000000,105144.000000,65250.000000,108.754348)}
{pt3dadd(169680.000000,105036.000000,65225.000000,101.810700)}
{pt3dadd(169644.000000,104964.000000,65175.000000,95.095560)}
{pt3dadd(169572.000000,104808.000000,65100.000000,93.259869)}
{pt3dadd(169524.000000,104628.000000,65050.000000,91.424178)}
{pt3dadd(169512.000000,104424.000000,65000.000000,90.528719)}
{pt3dadd(169500.000000,104328.000000,64925.000000,91.381536)}
{pt3dadd(169452.000000,104220.000000,64850.000000,89.545845)}
{pt3dadd(169344.000000,104112.000000,64775.000000,89.545845)}
{pt3dadd(169368.000000,104052.000000,64700.000000,90.441304)}
{pt3dadd(169164.000000,103908.000000,64675.000000,91.336763)}
{pt3dadd(169140.000000,103872.000000,64600.000000,93.172454)}
{pt3dadd(169080.000000,103836.000000,64525.000000,93.172454)}
{pt3dadd(169008.000000,103824.000000,64450.000000,94.067913)}
{pt3dadd(168924.000000,103800.000000,64350.000000,94.067913)}
{pt3dadd(168888.000000,103668.000000,64275.000000,93.172454)}
{pt3dadd(168900.000000,103596.000000,64200.000000,92.232222)}
{pt3dadd(168900.000000,103548.000000,64125.000000,92.232222)}
{pt3dadd(168780.000000,103536.000000,64050.000000,92.232222)}
{pt3dadd(168708.000000,103500.000000,63950.000000,92.232222)}
{pt3dadd(168672.000000,103488.000000,63875.000000,93.127681)}
{pt3dadd(168612.000000,103488.000000,63800.000000,93.127681)}
{pt3dadd(168600.000000,103356.000000,63675.000000,94.023140)}
{pt3dadd(168576.000000,103248.000000,63600.000000,94.023140)}
{pt3dadd(168540.000000,103212.000000,63500.000000,94.023140)}
{pt3dadd(168468.000000,103032.000000,63375.000000,92.274864)}
{pt3dadd(168408.000000,102828.000000,63300.000000,92.274864)}
{pt3dadd(168336.000000,102612.000000,63225.000000,93.215096)}
{pt3dadd(168192.000000,102420.000000,63125.000000,96.179176)}
{pt3dadd(168120.000000,102216.000000,63050.000000,97.119408)}
{pt3dadd(168096.000000,102132.000000,63050.000000,101.831764)}
{pt3dadd(168036.000000,101988.000000,63050.000000,101.831764)}
{pt3dadd(167976.000000,101820.000000,63050.000000,99.143256)}
{pt3dadd(168048.000000,101760.000000,62975.000000,94.430900)}
{pt3dadd(168048.000000,101628.000000,62875.000000,90.156654)}
{pt3dadd(168108.000000,101460.000000,62875.000000,82.638863)}
{pt3dadd(168048.000000,101448.000000,62800.000000,77.353070)}

{create adhoc47}
{access adhoc47}
{connect adhoc47(1), adhoc1(0)}
{nseg = 1}
{strdef color color = "White"}
{pt3dclear()}
{pt3dadd(169740.000000,106776.000000,54675.000000,303.234000)}
{pt3dadd(169752.000000,106656.000000,54775.000000,308.287907)}
{pt3dadd(169788.000000,106500.000000,54900.000000,267.166768)}
{pt3dadd(169764.000000,106260.000000,55075.000000,243.751848)}
{pt3dadd(169668.000000,105996.000000,55175.000000,208.305048)}
{pt3dadd(169632.000000,105864.000000,55300.000000,167.483046)}
{pt3dadd(169656.000000,105672.000000,55375.000000,152.165494)}
{pt3dadd(169560.000000,105624.000000,55425.000000,140.855022)}
{pt3dadd(169524.000000,105468.000000,55525.000000,134.253902)}
{pt3dadd(169500.000000,105288.000000,55575.000000,141.216198)}
{pt3dadd(169524.000000,105144.000000,55675.000000,147.531206)}
{pt3dadd(169440.000000,104988.000000,55800.000000,160.796350)}
{pt3dadd(169368.000000,104928.000000,55900.000000,176.113902)}
{pt3dadd(169260.000000,104808.000000,56000.000000,179.253552)}
{pt3dadd(169212.000000,104760.000000,56100.000000,186.184728)}
{pt3dadd(169068.000000,104652.000000,56200.000000,194.244458)}
{pt3dadd(168996.000000,104580.000000,56300.000000,186.966724)}
{pt3dadd(168828.000000,104436.000000,56400.000000,179.325102)}
{pt3dadd(168780.000000,104400.000000,56475.000000,184.648164)}
{pt3dadd(168804.000000,104388.000000,56575.000000,179.325102)}
{pt3dadd(168780.000000,104340.000000,56600.000000,181.186694)}
{pt3dadd(168588.000000,104172.000000,56625.000000,175.199284)}
{pt3dadd(168396.000000,104016.000000,56725.000000,164.940354)}
{pt3dadd(168288.000000,103764.000000,56825.000000,158.009178)}
{pt3dadd(168156.000000,103716.000000,56925.000000,161.470648)}
{pt3dadd(167988.000000,103608.000000,57075.000000,169.895536)}
{pt3dadd(167784.000000,103512.000000,57175.000000,197.120976)}
{pt3dadd(167664.000000,103452.000000,57300.000000,224.309966)}
{pt3dadd(167508.000000,103332.000000,57400.000000,247.156110)}
{pt3dadd(167436.000000,103200.000000,57500.000000,247.156110)}
{pt3dadd(167328.000000,103008.000000,57625.000000,228.809900)}
{pt3dadd(167148.000000,102876.000000,57725.000000,214.849604)}
{pt3dadd(166872.000000,102732.000000,57725.000000,207.716194)}
{pt3dadd(166764.000000,102564.000000,57775.000000,202.602028)}
{pt3dadd(166584.000000,102336.000000,57825.000000,215.264422)}
{pt3dadd(166476.000000,102240.000000,57925.000000,227.140416)}
{pt3dadd(166488.000000,102156.000000,58075.000000,225.185744)}
{pt3dadd(166332.000000,102012.000000,58225.000000,223.030716)}
{pt3dadd(166176.000000,101904.000000,58350.000000,216.236994)}
{pt3dadd(166176.000000,101820.000000,58450.000000,205.436192)}
{pt3dadd(166104.000000,101868.000000,58600.000000,198.158458)}
{pt3dadd(165996.000000,101856.000000,58700.000000,185.524986)}
{pt3dadd(165852.000000,101844.000000,58875.000000,168.884434)}
{pt3dadd(165696.000000,101844.000000,59050.000000,150.983882)}
{pt3dadd(165504.000000,101820.000000,59200.000000,137.090410)}
{pt3dadd(165444.000000,101832.000000,59275.000000,129.780000)}
{pt3dadd(165336.000000,101892.000000,59450.000000,133.950760)}
{pt3dadd(165096.000000,101880.000000,59575.000000,133.950760)}
{pt3dadd(164820.000000,101892.000000,59725.000000,136.533760)}
{pt3dadd(164712.000000,101820.000000,59850.000000,141.964520)}
{pt3dadd(164544.000000,101796.000000,60050.000000,143.287520)}
{pt3dadd(164472.000000,101724.000000,60150.000000,140.439760)}
{pt3dadd(164436.000000,101652.000000,60250.000000,143.151910)}
{pt3dadd(164388.000000,101736.000000,60400.000000,144.541060)}
{pt3dadd(164268.000000,101628.000000,60575.000000,139.110300)}
{pt3dadd(164160.000000,101592.000000,60700.000000,139.110300)}
{pt3dadd(164136.000000,101556.000000,60850.000000,136.527300)}
{pt3dadd(164076.000000,101556.000000,60975.000000,132.555150)}
{pt3dadd(164004.000000,101508.000000,61150.000000,128.583000)}
{pt3dadd(163896.000000,101436.000000,61275.000000,131.166000)}
{pt3dadd(163800.000000,101448.000000,61450.000000,131.166000)}
{pt3dadd(163680.000000,101316.000000,61675.000000,131.166000)}
{pt3dadd(163548.000000,101352.000000,61725.000000,132.426000)}
{pt3dadd(163476.000000,101352.000000,61900.000000,135.009000)}
{pt3dadd(163344.000000,101412.000000,61975.000000,142.684930)}
{pt3dadd(163188.000000,101352.000000,62275.000000,145.532690)}
{pt3dadd(163008.000000,101328.000000,62450.000000,152.494986)}
{pt3dadd(162840.000000,101184.000000,62725.000000,158.197282)}
{pt3dadd(162696.000000,101184.000000,62850.000000,161.045042)}
{pt3dadd(162576.000000,101076.000000,63000.000000,164.679584)}
{pt3dadd(162456.000000,101088.000000,63175.000000,177.149376)}
{pt3dadd(162300.000000,101016.000000,63350.000000,197.376070)}
{pt3dadd(162132.000000,101040.000000,63550.000000,220.222214)}
{pt3dadd(161928.000000,101064.000000,63725.000000,259.797710)}
{pt3dadd(161772.000000,101076.000000,63900.000000,298.106638)}
{pt3dadd(161592.000000,101052.000000,64125.000000,336.278602)}
{pt3dadd(161400.000000,101028.000000,64325.000000,369.225758)}
{pt3dadd(161232.000000,101004.000000,64525.000000,413.004574)}
{pt3dadd(161184.000000,101016.000000,64625.000000,432.401272)}
{pt3dadd(161064.000000,101028.000000,64750.000000,453.786128)}
{pt3dadd(160944.000000,101052.000000,64875.000000,449.916012)}
{pt3dadd(160848.000000,101040.000000,64975.000000,458.662966)}
{pt3dadd(160788.000000,101040.000000,65100.000000,433.592282)}
{pt3dadd(160776.000000,101028.000000,65225.000000,391.507688)}
{pt3dadd(160680.000000,100980.000000,65350.000000,345.109422)}
{pt3dadd(160644.000000,100956.000000,65550.000000,317.601296)}
{pt3dadd(160428.000000,100872.000000,65700.000000,260.750076)}
{pt3dadd(160404.000000,100836.000000,65800.000000,230.134056)}
{pt3dadd(160380.000000,100476.000000,66050.000000,216.386106)}
{pt3dadd(160380.000000,100428.000000,66250.000000,197.767526)}
{pt3dadd(160260.000000,100380.000000,66475.000000,177.045402)}
{pt3dadd(160080.000000,100260.000000,66700.000000,167.596522)}
{pt3dadd(159828.000000,100332.000000,66850.000000,144.240830)}
{pt3dadd(159768.000000,100320.000000,67050.000000,139.642570)}
{pt3dadd(159600.000000,100164.000000,67250.000000,129.872160)}
{pt3dadd(159516.000000,100008.000000,67425.000000,125.900010)}
{pt3dadd(159360.000000,99936.000000,67600.000000,123.317010)}
{pt3dadd(159180.000000,99852.000000,67775.000000,140.804030)}
{pt3dadd(159120.000000,99720.000000,67925.000000,156.887460)}
{pt3dadd(158964.000000,99696.000000,68100.000000,163.518220)}
{pt3dadd(158880.000000,99660.000000,68250.000000,167.490370)}
{pt3dadd(158820.000000,99648.000000,68400.000000,179.522250)}
{pt3dadd(158688.000000,99576.000000,68575.000000,179.522250)}
{pt3dadd(158628.000000,99576.000000,68775.000000,175.314814)}
{pt3dadd(158532.000000,99576.000000,68975.000000,192.202414)}
{pt3dadd(158388.000000,99576.000000,69125.000000,202.123736)}
{pt3dadd(158148.000000,99576.000000,69300.000000,202.123736)}
{pt3dadd(158040.000000,99612.000000,69450.000000,207.992408)}
{pt3dadd(157920.000000,99624.000000,69675.000000,202.403194)}
{pt3dadd(157752.000000,99672.000000,69825.000000,184.056984)}
{pt3dadd(157452.000000,99708.000000,70025.000000,180.422442)}
{pt3dadd(157284.000000,99756.000000,70175.000000,184.238706)}
{pt3dadd(157116.000000,99792.000000,70325.000000,186.393734)}
{pt3dadd(156924.000000,99816.000000,70525.000000,198.453164)}
{pt3dadd(156708.000000,99768.000000,70675.000000,216.799374)}
{pt3dadd(156564.000000,99756.000000,70875.000000,216.799374)}
{pt3dadd(156468.000000,99804.000000,71075.000000,216.799374)}
{pt3dadd(156336.000000,99840.000000,71325.000000,212.591938)}
{pt3dadd(156204.000000,99804.000000,71550.000000,198.843988)}
{pt3dadd(156120.000000,99852.000000,71700.000000,192.373772)}
{pt3dadd(156000.000000,99888.000000,71900.000000,197.962986)}
{pt3dadd(155964.000000,99948.000000,72050.000000,202.170422)}
{pt3dadd(155904.000000,99996.000000,72200.000000,206.377858)}
{pt3dadd(155832.000000,100020.000000,72400.000000,222.501722)}
{pt3dadd(155784.000000,100044.000000,72600.000000,222.501722)}
{pt3dadd(155748.000000,100080.000000,72825.000000,231.347852)}
{pt3dadd(155700.000000,100092.000000,72950.000000,233.610632)}
{pt3dadd(155688.000000,100176.000000,73125.000000,233.610632)}
{pt3dadd(155688.000000,100272.000000,73275.000000,233.610632)}
{pt3dadd(155676.000000,100308.000000,73450.000000,229.794368)}
{pt3dadd(155592.000000,100356.000000,73600.000000,218.993566)}
{pt3dadd(155460.000000,100464.000000,73750.000000,195.475206)}
{pt3dadd(155376.000000,100512.000000,73925.000000,175.419626)}
{pt3dadd(155316.000000,100536.000000,74075.000000,150.725352)}
{pt3dadd(155280.000000,100608.000000,74275.000000,138.693472)}
{pt3dadd(155292.000000,100632.000000,74450.000000,126.060000)}
{pt3dadd(155244.000000,100716.000000,74625.000000,126.060000)}
{pt3dadd(155196.000000,100764.000000,74800.000000,126.060000)}
{pt3dadd(155076.000000,100836.000000,74950.000000,126.060000)}
{pt3dadd(155040.000000,100884.000000,75150.000000,126.060000)}
{pt3dadd(154944.000000,100956.000000,75200.000000,124.800000)}
{pt3dadd(154872.000000,100812.000000,75300.000000,126.000000)}
{pt3dadd(154776.000000,100836.000000,75425.000000,124.800000)}
{pt3dadd(154656.000000,100992.000000,75550.000000,124.800000)}
{pt3dadd(154596.000000,101052.000000,75675.000000,124.800000)}
{pt3dadd(154584.000000,101064.000000,75775.000000,124.800000)}
{pt3dadd(154764.000000,101088.000000,75825.000000,124.800000)}
{pt3dadd(154548.000000,101280.000000,75950.000000,126.000000)}
{pt3dadd(154524.000000,101304.000000,76075.000000,127.260000)}
{pt3dadd(154476.000000,101352.000000,76250.000000,127.260000)}
{pt3dadd(154440.000000,101424.000000,76400.000000,127.260000)}
{pt3dadd(154356.000000,101604.000000,76550.000000,128.520000)}
{pt3dadd(154248.000000,101700.000000,76700.000000,129.780000)}
{pt3dadd(154116.000000,101736.000000,76875.000000,127.320000)}
{pt3dadd(154080.000000,101832.000000,77025.000000,134.282296)}
{pt3dadd(153948.000000,101796.000000,77200.000000,146.314176)}
{pt3dadd(153828.000000,101832.000000,77325.000000,153.624586)}
{pt3dadd(153744.000000,101868.000000,77525.000000,159.326882)}
{pt3dadd(153600.000000,101904.000000,77675.000000,167.489178)}
{pt3dadd(153516.000000,101916.000000,77875.000000,172.558762)}
{pt3dadd(153432.000000,101940.000000,78050.000000,170.785812)}
{pt3dadd(153348.000000,101952.000000,78250.000000,176.108874)}
{pt3dadd(153216.000000,102000.000000,78425.000000,176.108874)}
{pt3dadd(153072.000000,102096.000000,78600.000000,176.108874)}
{pt3dadd(153000.000000,102168.000000,78825.000000,188.771268)}
{pt3dadd(152916.000000,102228.000000,79000.000000,213.959138)}
{pt3dadd(152820.000000,102288.000000,79175.000000,224.759940)}
{pt3dadd(152700.000000,102348.000000,79400.000000,237.853224)}
{pt3dadd(152520.000000,102408.000000,79575.000000,250.946508)}
{pt3dadd(152172.000000,102456.000000,79825.000000,238.284114)}
{pt3dadd(151956.000000,102552.000000,80075.000000,214.869194)}
{pt3dadd(151824.000000,102612.000000,80275.000000,202.206800)}
{pt3dadd(151752.000000,102636.000000,80375.000000,184.734220)}
{pt3dadd(151524.000000,102600.000000,80525.000000,167.261640)}
{pt3dadd(151368.000000,102552.000000,80675.000000,171.077904)}
{pt3dadd(151116.000000,102492.000000,80850.000000,174.894168)}
{pt3dadd(150888.000000,102468.000000,81025.000000,176.755760)}
{pt3dadd(150792.000000,102516.000000,81200.000000,188.066232)}
{pt3dadd(150768.000000,102576.000000,81325.000000,195.742162)}
{pt3dadd(150660.000000,102588.000000,81475.000000,191.925898)}
{pt3dadd(150540.000000,102588.000000,81650.000000,178.660754)}
{pt3dadd(150480.000000,102624.000000,81800.000000,176.799162)}
{pt3dadd(150336.000000,102756.000000,81975.000000,180.806242)}
{pt3dadd(150264.000000,102816.000000,82175.000000,203.106172)}
{pt3dadd(150108.000000,102876.000000,82325.000000,223.633152)}
{pt3dadd(150060.000000,102936.000000,82525.000000,253.609012)}
{pt3dadd(149880.000000,103188.000000,82725.000000,263.895492)}
{pt3dadd(149784.000000,103272.000000,82825.000000,266.050520)}
{pt3dadd(149652.000000,103404.000000,82950.000000,251.392212)}
{pt3dadd(149520.000000,103572.000000,83100.000000,234.681496)}
{pt3dadd(149424.000000,103716.000000,83250.000000,217.970780)}
{pt3dadd(149340.000000,103896.000000,83400.000000,217.970780)}
{pt3dadd(149244.000000,104040.000000,83525.000000,217.970780)}
{pt3dadd(149112.000000,104172.000000,83650.000000,215.918372)}
{pt3dadd(148920.000000,104328.000000,83800.000000,213.963700)}
{pt3dadd(148836.000000,104472.000000,83950.000000,213.963700)}
{pt3dadd(148608.000000,104676.000000,84100.000000,197.076100)}
{pt3dadd(148356.000000,104892.000000,84300.000000,175.820520)}
{pt3dadd(148200.000000,104964.000000,84350.000000,165.403136)}
{pt3dadd(147996.000000,105228.000000,84450.000000,167.357808)}
{pt3dadd(147792.000000,105612.000000,84575.000000,186.956464)}
{pt3dadd(147684.000000,105840.000000,84675.000000,214.084564)}
{pt3dadd(147552.000000,106080.000000,84800.000000,250.731364)}
{pt3dadd(147444.000000,106272.000000,84925.000000,265.356184)}
{pt3dadd(147432.000000,106320.000000,85075.000000,272.768733)}
{pt3dadd(147384.000000,106392.000000,85250.000000,226.277900)}

{create adhoc48}
{access adhoc48}
{connect adhoc48(1), adhoc47(0)}
{nseg = 1}
{strdef color color = "White"}
{pt3dclear()}
{pt3dadd(147384.000000,106392.000000,85250.000000,226.277900)}
{pt3dadd(147456.000000,106488.000000,85375.000000,202.634887)}
{pt3dadd(147552.000000,106488.000000,85475.000000,173.240932)}
{pt3dadd(147588.000000,106572.000000,85600.000000,149.754060)}
{pt3dadd(147588.000000,106572.000000,85700.000000,133.254283)}
{pt3dadd(147636.000000,106620.000000,85850.000000,115.929519)}
{pt3dadd(147660.000000,106692.000000,85975.000000,110.201622)}
{pt3dadd(147672.000000,106788.000000,86100.000000,103.806250)}
{pt3dadd(147780.000000,106848.000000,86250.000000,100.842170)}
{pt3dadd(147852.000000,106848.000000,86350.000000,99.854927)}
{pt3dadd(147936.000000,106872.000000,86450.000000,99.854927)}
{pt3dadd(148104.000000,106860.000000,86650.000000,98.867684)}
{pt3dadd(148128.000000,106920.000000,86700.000000,97.972225)}
{pt3dadd(148188.000000,107076.000000,86750.000000,100.936305)}
{pt3dadd(148188.000000,107088.000000,86875.000000,99.996073)}
{pt3dadd(148260.000000,107232.000000,87050.000000,97.972225)}
{pt3dadd(148356.000000,107208.000000,87175.000000,97.031993)}
{pt3dadd(148440.000000,107220.000000,87275.000000,98.867684)}
{pt3dadd(148524.000000,107136.000000,87425.000000,95.903604)}
{pt3dadd(148560.000000,107148.000000,87575.000000,94.155328)}
{pt3dadd(148536.000000,107220.000000,87800.000000,91.466820)}
{pt3dadd(148524.000000,107208.000000,88000.000000,89.718544)}
{pt3dadd(148548.000000,107256.000000,88100.000000,89.718544)}
{pt3dadd(148560.000000,107256.000000,88275.000000,96.113916)}
{pt3dadd(148608.000000,107220.000000,88450.000000,112.827974)}
{pt3dadd(148584.000000,107184.000000,88650.000000,134.865094)}
{pt3dadd(148572.000000,107112.000000,88850.000000,149.971038)}
{pt3dadd(148572.000000,107124.000000,89075.000000,169.319650)}
{pt3dadd(148536.000000,107064.000000,89300.000000,183.915400)}
{pt3dadd(148536.000000,107064.000000,89500.000000,195.467360)}

{create adhoc49}
{access adhoc49}
{connect adhoc49(1), adhoc48(0)}
{nseg = 1}
{strdef color color = "White"}
{pt3dclear()}
{pt3dadd(148536.000000,107064.000000,89500.000000,195.467360)}
{pt3dadd(148476.000000,106884.000000,89550.000000,153.776037)}
{pt3dadd(148392.000000,106728.000000,89600.000000,139.234330)}
{pt3dadd(148308.000000,106608.000000,89600.000000,121.909566)}
{pt3dadd(148284.000000,106548.000000,89625.000000,115.594558)}
{pt3dadd(148176.000000,106452.000000,89625.000000,112.326661)}
{pt3dadd(148056.000000,106380.000000,89625.000000,109.983803)}
{pt3dadd(147948.000000,106272.000000,89625.000000,112.215095)}
{pt3dadd(147864.000000,106104.000000,89625.000000,110.191247)}
{pt3dadd(147816.000000,105912.000000,89775.000000,107.078965)}
{pt3dadd(147756.000000,105720.000000,89775.000000,107.078965)}
{pt3dadd(147744.000000,105576.000000,89750.000000,105.990531)}
{pt3dadd(147732.000000,105396.000000,89775.000000,108.450531)}
{pt3dadd(147696.000000,105252.000000,89800.000000,113.905671)}
{pt3dadd(147624.000000,105096.000000,89775.000000,115.929519)}
{pt3dadd(147612.000000,104964.000000,89775.000000,119.197416)}
{pt3dadd(147612.000000,104808.000000,89775.000000,126.600858)}
{pt3dadd(147588.000000,104688.000000,89800.000000,127.923858)}
{pt3dadd(147540.000000,104544.000000,89850.000000,130.506858)}
{pt3dadd(147504.000000,104400.000000,89825.000000,137.910300)}
{pt3dadd(147396.000000,104268.000000,89875.000000,144.541060)}
{pt3dadd(147360.000000,104124.000000,89925.000000,143.151910)}
{pt3dadd(147360.000000,103968.000000,89950.000000,143.151910)}
{pt3dadd(147300.000000,103836.000000,89925.000000,141.828910)}
{pt3dadd(147240.000000,103692.000000,89950.000000,137.856760)}
{pt3dadd(147216.000000,103596.000000,89975.000000,128.994708)}
{pt3dadd(147204.000000,103512.000000,89950.000000,122.980416)}
{pt3dadd(147180.000000,103416.000000,89950.000000,114.002044)}
{pt3dadd(147144.000000,103296.000000,89975.000000,104.598396)}
{pt3dadd(147120.000000,103200.000000,89950.000000,98.203024)}
{pt3dadd(147084.000000,103056.000000,89925.000000,94.343485)}
{pt3dadd(147048.000000,102924.000000,89875.000000,90.483946)}
{pt3dadd(146928.000000,102804.000000,89750.000000,91.424178)}
{pt3dadd(146844.000000,102684.000000,89750.000000,96.136534)}
{pt3dadd(146796.000000,102552.000000,89725.000000,99.100614)}
{pt3dadd(146664.000000,102348.000000,89650.000000,101.923548)}
{pt3dadd(146592.000000,102144.000000,89600.000000,104.746482)}
{pt3dadd(146568.000000,102060.000000,89525.000000,106.770330)}
{pt3dadd(146508.000000,101892.000000,89525.000000,106.770330)}
{pt3dadd(146544.000000,101724.000000,89600.000000,110.201622)}
{pt3dadd(146532.000000,101580.000000,89675.000000,111.238227)}
{pt3dadd(146496.000000,101388.000000,89675.000000,112.274832)}
{pt3dadd(146448.000000,101172.000000,89650.000000,113.363266)}
{pt3dadd(146376.000000,101016.000000,89700.000000,118.054558)}
{pt3dadd(146316.000000,100872.000000,89650.000000,123.485318)}
{pt3dadd(146268.000000,100668.000000,89650.000000,135.487020)}
{pt3dadd(146184.000000,100464.000000,89700.000000,156.818864)}
{pt3dadd(146016.000000,100260.000000,89700.000000,171.193602)}
{pt3dadd(145836.000000,100044.000000,89750.000000,190.171403)}
{pt3dadd(145728.000000,99756.000000,89775.000000,186.159400)}

{create adhoc50}
{access adhoc50}
{connect adhoc50(1), adhoc49(0)}
{nseg = 1}
{strdef color color = "White"}
{pt3dclear()}
{pt3dadd(145728.000000,99756.000000,89775.000000,186.159400)}
{pt3dadd(145872.000000,99756.000000,89925.000000,167.208920)}
{pt3dadd(145944.000000,99756.000000,90175.000000,143.129980)}
{pt3dadd(146004.000000,99756.000000,90300.000000,119.930403)}
{pt3dadd(146064.000000,99708.000000,90475.000000,96.307545)}
{pt3dadd(146100.000000,99708.000000,90625.000000,86.339848)}
{pt3dadd(146136.000000,99660.000000,90750.000000,78.583993)}
{pt3dadd(146196.000000,99672.000000,90900.000000,78.583993)}
{pt3dadd(146280.000000,99696.000000,91000.000000,88.551690)}
{pt3dadd(146412.000000,99600.000000,91075.000000,94.849784)}
{pt3dadd(146652.000000,99576.000000,91225.000000,97.061626)}
{pt3dadd(146844.000000,99600.000000,91350.000000,99.622109)}
{pt3dadd(147168.000000,99552.000000,91450.000000,97.873833)}
{pt3dadd(147336.000000,99492.000000,91550.000000,92.678461)}
{pt3dadd(147516.000000,99348.000000,91700.000000,88.818922)}
{pt3dadd(147600.000000,99216.000000,91825.000000,89.616915)}
{pt3dadd(147684.000000,99156.000000,91900.000000,89.545845)}

{create adhoc51}
{access adhoc51}
{connect adhoc51(1), adhoc49(0)}
{nseg = 1}
{strdef color color = "White"}
{pt3dclear()}
{pt3dadd(145728.000000,99756.000000,89775.000000,186.159400)}
{pt3dadd(145560.000000,99852.000000,89600.000000,144.248370)}
{pt3dadd(145272.000000,99828.000000,89550.000000,126.038742)}
{pt3dadd(145020.000000,99768.000000,89500.000000,107.611490)}
{pt3dadd(144888.000000,99732.000000,89425.000000,99.956118)}
{pt3dadd(144720.000000,99612.000000,89375.000000,95.903604)}
{pt3dadd(144576.000000,99600.000000,89275.000000,94.963372)}
{pt3dadd(144420.000000,99600.000000,89225.000000,91.462657)}
{pt3dadd(144168.000000,99456.000000,89125.000000,89.714381)}
{pt3dadd(144084.000000,99408.000000,89050.000000,87.966105)}
{pt3dadd(143748.000000,99384.000000,88925.000000,86.217829)}
{pt3dadd(143592.000000,99360.000000,88900.000000,86.217829)}
{pt3dadd(143424.000000,99324.000000,88875.000000,88.778312)}
{pt3dadd(143256.000000,99252.000000,88875.000000,88.778312)}
{pt3dadd(143076.000000,99180.000000,88825.000000,88.778312)}
{pt3dadd(142992.000000,99108.000000,88825.000000,89.631129)}
{pt3dadd(142848.000000,99108.000000,88825.000000,91.558604)}
{pt3dadd(142740.000000,99096.000000,88800.000000,106.524386)}
{pt3dadd(142452.000000,98952.000000,88800.000000,120.098794)}
{pt3dadd(142260.000000,98928.000000,88875.000000,140.274322)}
{pt3dadd(142140.000000,98940.000000,88925.000000,165.465705)}
{pt3dadd(142128.000000,98796.000000,88775.000000,176.895898)}
{pt3dadd(142140.000000,98676.000000,88600.000000,169.585488)}
{pt3dadd(142020.000000,98448.000000,88525.000000,164.154728)}
{pt3dadd(141852.000000,98256.000000,88450.000000,150.922848)}
{pt3dadd(141612.000000,97992.000000,88450.000000,129.591004)}
{pt3dadd(141456.000000,97812.000000,88450.000000,117.173568)}
{pt3dadd(141324.000000,97776.000000,88400.000000,112.482276)}
{pt3dadd(141192.000000,97644.000000,88325.000000,106.086904)}
{pt3dadd(141048.000000,97488.000000,88325.000000,99.143256)}
{pt3dadd(140940.000000,97368.000000,88275.000000,93.618693)}
{pt3dadd(140856.000000,97224.000000,88225.000000,86.841875)}
{pt3dadd(140772.000000,97080.000000,88200.000000,81.220726)}

{create adhoc52}
{access adhoc52}
{connect adhoc52(1), adhoc48(0)}
{nseg = 1}
{strdef color color = "White"}
{pt3dclear()}
{pt3dadd(148536.000000,107064.000000,89500.000000,195.467360)}
{pt3dadd(148584.000000,107160.000000,89500.000000,166.592753)}
{pt3dadd(148692.000000,107508.000000,89500.000000,136.756864)}
{pt3dadd(148728.000000,107688.000000,89500.000000,111.695695)}
{pt3dadd(148800.000000,107880.000000,89550.000000,88.846368)}
{pt3dadd(148944.000000,108204.000000,89700.000000,81.811578)}
{pt3dadd(148932.000000,108312.000000,89725.000000,79.123070)}
{pt3dadd(148980.000000,108456.000000,89825.000000,78.310863)}
{pt3dadd(149028.000000,108612.000000,89875.000000,78.310863)}
{pt3dadd(149064.000000,108768.000000,89900.000000,76.099021)}
{pt3dadd(149088.000000,108888.000000,90000.000000,77.609248)}
{pt3dadd(149064.000000,109092.000000,90150.000000,76.797041)}
{pt3dadd(149064.000000,109260.000000,90325.000000,76.797041)}
{pt3dadd(149064.000000,109464.000000,90425.000000,79.821090)}
{pt3dadd(148980.000000,109704.000000,90550.000000,82.845140)}
{pt3dadd(149028.000000,109920.000000,90550.000000,83.657346)}
{pt3dadd(149124.000000,110160.000000,90600.000000,84.469553)}
{pt3dadd(149256.000000,110460.000000,90600.000000,84.469553)}
{pt3dadd(149352.000000,110592.000000,90625.000000,83.657346)}
{pt3dadd(149376.000000,110736.000000,90575.000000,82.845140)}
{pt3dadd(149484.000000,110928.000000,90525.000000,81.259402)}
{pt3dadd(149616.000000,111108.000000,90525.000000,96.365346)}
{pt3dadd(149772.000000,111300.000000,90525.000000,104.121200)}
{pt3dadd(149928.000000,111372.000000,90375.000000,106.681683)}
{pt3dadd(149952.000000,111420.000000,90275.000000,124.944873)}
{pt3dadd(149940.000000,111384.000000,90175.000000,94.023140)}

{create adhoc53}
{access adhoc53}
{connect adhoc53(1), adhoc47(0)}
{nseg = 1}
{strdef color color = "White"}
{pt3dclear()}
{pt3dadd(147384.000000,106392.000000,85250.000000,226.277900)}
{pt3dadd(147108.000000,106476.000000,85250.000000,167.125030)}
{pt3dadd(146952.000000,106632.000000,85250.000000,138.824506)}
{pt3dadd(146808.000000,106800.000000,85325.000000,111.478095)}
{pt3dadd(146616.000000,107148.000000,85475.000000,98.120427)}
{pt3dadd(146280.000000,107376.000000,85600.000000,95.008145)}
{pt3dadd(146160.000000,107556.000000,85650.000000,92.319637)}
{pt3dadd(146208.000000,107796.000000,85650.000000,101.298009)}
{pt3dadd(146196.000000,108060.000000,85650.000000,107.640353)}
{pt3dadd(146028.000000,108336.000000,85775.000000,138.915000)}

{create adhoc54}
{access adhoc54}
{connect adhoc54(1), adhoc53(0)}
{nseg = 1}
{strdef color color = "White"}
{pt3dclear()}
{pt3dadd(146028.000000,108336.000000,85775.000000,138.915000)}
{pt3dadd(146112.000000,108420.000000,85925.000000,141.684397)}
{pt3dadd(146256.000000,108588.000000,86050.000000,118.787801)}
{pt3dadd(146256.000000,108636.000000,86125.000000,105.037104)}
{pt3dadd(146352.000000,108888.000000,86225.000000,84.312092)}
{pt3dadd(146364.000000,109008.000000,86225.000000,75.907482)}
{pt3dadd(146388.000000,109164.000000,86250.000000,72.406767)}
{pt3dadd(146400.000000,109320.000000,86275.000000,73.108382)}
{pt3dadd(146424.000000,109440.000000,86350.000000,76.132431)}
{pt3dadd(146424.000000,109548.000000,86400.000000,81.143373)}
{pt3dadd(146436.000000,109596.000000,86425.000000,87.524135)}
{pt3dadd(146472.000000,109908.000000,86550.000000,92.012093)}
{pt3dadd(146496.000000,110004.000000,86625.000000,91.310478)}
{pt3dadd(146460.000000,110172.000000,86650.000000,99.454126)}
{pt3dadd(146448.000000,110304.000000,86700.000000,115.168196)}
{pt3dadd(146328.000000,110736.000000,86775.000000,132.655216)}
{pt3dadd(146340.000000,110844.000000,86925.000000,139.706113)}
{pt3dadd(146400.000000,111096.000000,87075.000000,147.442518)}
{pt3dadd(146508.000000,111348.000000,87075.000000,145.099660)}
{pt3dadd(146616.000000,111600.000000,87075.000000,126.697082)}
{pt3dadd(146784.000000,111864.000000,87075.000000,106.521554)}
{pt3dadd(146856.000000,111948.000000,86975.000000,96.647723)}
{pt3dadd(147108.000000,112140.000000,86975.000000,98.879015)}
{pt3dadd(147276.000000,112344.000000,86975.000000,101.221873)}
{pt3dadd(147468.000000,112632.000000,87050.000000,109.365521)}
{pt3dadd(147600.000000,112872.000000,87150.000000,116.309169)}
{pt3dadd(147660.000000,112932.000000,87150.000000,114.644145)}
{pt3dadd(147696.000000,112992.000000,87150.000000,110.389005)}
{pt3dadd(147816.000000,113196.000000,87200.000000,103.993633)}
{pt3dadd(147936.000000,113388.000000,87225.000000,97.598261)}
{pt3dadd(148056.000000,113544.000000,87300.000000,91.507430)}
{pt3dadd(148176.000000,113652.000000,87375.000000,93.172454)}
{pt3dadd(148284.000000,113844.000000,87350.000000,90.483946)}
{pt3dadd(148368.000000,113988.000000,87400.000000,90.483946)}
{pt3dadd(148464.000000,114036.000000,87450.000000,90.483946)}
{pt3dadd(148572.000000,114132.000000,87525.000000,91.379405)}
{pt3dadd(148692.000000,114084.000000,87475.000000,93.215096)}
{pt3dadd(148848.000000,114204.000000,87550.000000,92.402889)}
{pt3dadd(148992.000000,114336.000000,87575.000000,85.719892)}
{pt3dadd(149160.000000,114576.000000,87700.000000,82.385878)}
{pt3dadd(149316.000000,114828.000000,87800.000000,80.637602)}
{pt3dadd(149364.000000,114948.000000,87925.000000,77.136887)}
{pt3dadd(149472.000000,115188.000000,88000.000000,77.949094)}
{pt3dadd(149496.000000,115224.000000,88025.000000,86.559566)}
{pt3dadd(149616.000000,115548.000000,88150.000000,95.088952)}
{pt3dadd(149808.000000,115716.000000,88175.000000,99.801308)}
{pt3dadd(150024.000000,115860.000000,88225.000000,103.302023)}
{pt3dadd(150264.000000,116040.000000,88225.000000,105.990531)}
{pt3dadd(150456.000000,116232.000000,88225.000000,107.027136)}
{pt3dadd(150612.000000,116424.000000,88350.000000,102.771996)}
{pt3dadd(150672.000000,116604.000000,88400.000000,97.247433)}
{pt3dadd(150708.000000,116736.000000,88400.000000,94.558925)}
{pt3dadd(150888.000000,116892.000000,88450.000000,92.723234)}
{pt3dadd(151092.000000,117024.000000,88450.000000,90.699386)}
{pt3dadd(151284.000000,117168.000000,88450.000000,88.863695)}
{pt3dadd(151332.000000,117204.000000,88325.000000,100.402550)}
{pt3dadd(151500.000000,117360.000000,88375.000000,120.578078)}
{pt3dadd(151620.000000,117564.000000,88425.000000,141.762381)}
{pt3dadd(151824.000000,117672.000000,88425.000000,142.749624)}
{pt3dadd(151944.000000,117840.000000,88550.000000,145.572558)}
{pt3dadd(152100.000000,118044.000000,88725.000000,134.033703)}
{pt3dadd(152184.000000,118224.000000,88850.000000,115.606451)}
{pt3dadd(152280.000000,118452.000000,89025.000000,94.422148)}
{pt3dadd(152340.000000,118776.000000,89200.000000,89.934190)}
{pt3dadd(152328.000000,118920.000000,89325.000000,88.006715)}
{pt3dadd(152352.000000,119352.000000,89500.000000,89.671739)}
{pt3dadd(152316.000000,119724.000000,89625.000000,93.724253)}
{pt3dadd(152364.000000,119928.000000,89675.000000,106.445844)}
{pt3dadd(152448.000000,120108.000000,89750.000000,117.984699)}
{pt3dadd(152568.000000,120324.000000,89875.000000,132.950481)}
{pt3dadd(152760.000000,120576.000000,89875.000000,156.089456)}
{pt3dadd(152868.000000,120684.000000,89875.000000,159.692314)}
{pt3dadd(153012.000000,120864.000000,89900.000000,156.844554)}
{pt3dadd(153204.000000,121056.000000,89825.000000,154.261554)}
{pt3dadd(153084.000000,120972.000000,89750.000000,136.735289)}
{pt3dadd(153168.000000,121248.000000,89625.000000,115.378575)}
{pt3dadd(153192.000000,121356.000000,89600.000000,81.220726)}

{create adhoc55}
{access adhoc55}
{connect adhoc55(1), adhoc53(0)}
{nseg = 1}
{strdef color color = "White"}
{pt3dclear()}
{pt3dadd(146028.000000,108336.000000,85775.000000,138.915000)}
{pt3dadd(145860.000000,108396.000000,85875.000000,118.832253)}
{pt3dadd(145500.000000,108408.000000,85875.000000,108.100564)}
{pt3dadd(145308.000000,108252.000000,85800.000000,95.051482)}
{pt3dadd(145152.000000,108204.000000,85700.000000,84.062096)}
{pt3dadd(145056.000000,108108.000000,85700.000000,81.739662)}
{pt3dadd(144960.000000,108072.000000,85700.000000,76.728720)}
{pt3dadd(144852.000000,107964.000000,85650.000000,74.406286)}
{pt3dadd(144720.000000,107892.000000,85600.000000,74.406286)}
{pt3dadd(144528.000000,107892.000000,85575.000000,74.406286)}
{pt3dadd(144408.000000,107904.000000,85550.000000,73.704671)}
{pt3dadd(144408.000000,107916.000000,85500.000000,72.334851)}
{pt3dadd(144300.000000,108108.000000,85400.000000,71.633236)}
{pt3dadd(144216.000000,108216.000000,85400.000000,72.369932)}
{pt3dadd(144144.000000,108252.000000,85350.000000,71.445025)}
{pt3dadd(144000.000000,108348.000000,85225.000000,77.353070)}
