# Supplementary material for: Full reconstruction of large lobula plate tangential cells in Drosophila from a 3D EM dataset
Source: PLoS One. 2018 Nov 28;13(11):e0207828. doi: 10.1371/journal.pone.0207828 (PMC6261601; doi:10.1371/journal.pone.0207828)
Supplement: S1 Dataset — (ZIP) [file pone.0207828.s001.zip › Diameter hoc/Zelle64_fertig.hoc0001.hoc]

/* created with convertKnossosNmlToHoc.m */

{create adhoc1}
{access adhoc1}
{nseg = 1}
{strdef color color = "White"}
{pt3dclear()}
{pt3dadd(187548.000000,163692.000000,75825.000000,368.582860)}
{pt3dadd(187512.000000,163500.000000,76225.000000,259.850993)}
{pt3dadd(187440.000000,163188.000000,76775.000000,238.398056)}
{pt3dadd(187536.000000,163104.000000,77175.000000,203.774956)}
{pt3dadd(187716.000000,162756.000000,77675.000000,205.929984)}
{pt3dadd(187896.000000,162804.000000,77875.000000,219.225502)}
{pt3dadd(188052.000000,162636.000000,78025.000000,237.002062)}
{pt3dadd(188316.000000,162684.000000,78250.000000,244.135472)}
{pt3dadd(188424.000000,162684.000000,78400.000000,260.050440)}
{pt3dadd(188520.000000,162684.000000,78500.000000,269.803300)}
{pt3dadd(188592.000000,162684.000000,78750.000000,275.173170)}
{pt3dadd(188640.000000,162696.000000,78925.000000,280.811530)}
{pt3dadd(188784.000000,162756.000000,79200.000000,273.678120)}
{pt3dadd(188856.000000,162756.000000,79425.000000,266.188040)}
{pt3dadd(188832.000000,163104.000000,79800.000000,256.435180)}
{pt3dadd(188856.000000,163248.000000,80175.000000,239.724464)}
{pt3dadd(188928.000000,163464.000000,80475.000000,224.333244)}
{pt3dadd(189084.000000,163548.000000,80700.000000,228.971938)}
{pt3dadd(189240.000000,163728.000000,80975.000000,231.347852)}
{pt3dadd(189420.000000,163752.000000,81250.000000,246.739072)}
{pt3dadd(189660.000000,163896.000000,81525.000000,269.370072)}
{pt3dadd(189792.000000,163944.000000,81750.000000,290.977596)}
{pt3dadd(190056.000000,163632.000000,81975.000000,304.762466)}
{pt3dadd(190176.000000,163788.000000,82200.000000,307.257182)}
{pt3dadd(190380.000000,163920.000000,82475.000000,296.504656)}
{pt3dadd(190476.000000,163920.000000,82825.000000,293.472312)}
{pt3dadd(190692.000000,163992.000000,83100.000000,293.472312)}
{pt3dadd(190884.000000,164064.000000,83350.000000,299.999424)}
{pt3dadd(191064.000000,164160.000000,83600.000000,314.473538)}
{pt3dadd(191268.000000,164196.000000,83725.000000,328.258408)}
{pt3dadd(191580.000000,164220.000000,84100.000000,320.000598)}
{pt3dadd(191844.000000,164304.000000,84375.000000,305.526484)}
{pt3dadd(192036.000000,164268.000000,84800.000000,287.709218)}
{pt3dadd(192108.000000,164436.000000,84950.000000,273.235104)}
{pt3dadd(192264.000000,164472.000000,85350.000000,267.314820)}
{pt3dadd(192264.000000,164436.000000,85700.000000,275.572630)}
{pt3dadd(192288.000000,164436.000000,85925.000000,296.900212)}
{pt3dadd(192252.000000,164544.000000,86300.000000,329.847368)}
{pt3dadd(192144.000000,164484.000000,86550.000000,371.541478)}
{pt3dadd(192036.000000,164364.000000,86725.000000,387.499190)}
{pt3dadd(191976.000000,164280.000000,86925.000000,390.531534)}
{pt3dadd(191868.000000,164172.000000,87075.000000,383.678066)}
{pt3dadd(191784.000000,164124.000000,87150.000000,365.205024)}
{pt3dadd(191712.000000,163980.000000,87275.000000,337.985028)}
{pt3dadd(191616.000000,163908.000000,87375.000000,319.276896)}
{pt3dadd(191460.000000,163716.000000,87600.000000,313.356612)}
{pt3dadd(191448.000000,163716.000000,87900.000000,294.011868)}
{pt3dadd(191436.000000,163656.000000,88200.000000,272.404344)}
{pt3dadd(191424.000000,163560.000000,88475.000000,257.930230)}
{pt3dadd(191424.000000,163524.000000,88850.000000,250.440150)}
{pt3dadd(191616.000000,163524.000000,89050.000000,256.360434)}
{pt3dadd(191604.000000,163500.000000,89425.000000,258.736348)}
{pt3dadd(191688.000000,163452.000000,89725.000000,271.239628)}
{pt3dadd(191772.000000,163404.000000,90050.000000,396.258358)}
{pt3dadd(191820.000000,163524.000000,90375.000000,526.147718)}
{pt3dadd(191868.000000,163524.000000,90700.000000,623.382594)}
{pt3dadd(191808.000000,163704.000000,90925.000000,859.549100)}
{pt3dadd(191916.000000,164844.000000,91050.000000,804.570100)}

{create adhoc2}
{access adhoc2}
{connect adhoc2(1), adhoc1(0)}
{nseg = 1}
{strdef color color = "White"}
{pt3dclear()}
{pt3dadd(191916.000000,164844.000000,91050.000000,804.570100)}
{pt3dadd(191436.000000,165732.000000,90900.000000,755.281767)}
{pt3dadd(191676.000000,166500.000000,90750.000000,742.510820)}
{pt3dadd(191508.000000,167484.000000,90625.000000,766.257260)}

{create adhoc3}
{access adhoc3}
{connect adhoc3(1), adhoc2(0)}
{nseg = 1}
{strdef color color = "White"}
{pt3dclear()}
{pt3dadd(191508.000000,167484.000000,90625.000000,766.257260)}
{pt3dadd(191064.000000,168528.000000,90775.000000,576.869680)}
{pt3dadd(190512.000000,169416.000000,90925.000000,543.696320)}
{pt3dadd(190116.000000,170280.000000,91125.000000,471.717384)}
{pt3dadd(189804.000000,171156.000000,91350.000000,462.533082)}
{pt3dadd(189744.000000,171900.000000,91550.000000,472.176594)}
{pt3dadd(189516.000000,172728.000000,91500.000000,472.176594)}
{pt3dadd(189504.000000,173892.000000,91650.000000,482.302290)}
{pt3dadd(189420.000000,174768.000000,91600.000000,515.388368)}
{pt3dadd(189672.000000,175392.000000,91825.000000,529.512026)}
{pt3dadd(189600.000000,176160.000000,91750.000000,529.512026)}
{pt3dadd(189372.000000,176832.000000,91800.000000,534.451382)}
{pt3dadd(189744.000000,177468.000000,91900.000000,524.325686)}
{pt3dadd(189576.000000,178188.000000,91625.000000,499.570046)}
{pt3dadd(189948.000000,178824.000000,91700.000000,564.803164)}
{pt3dadd(189720.000000,179580.000000,91575.000000,569.989504)}
{pt3dadd(189864.000000,180348.000000,91400.000000,565.050148)}
{pt3dadd(190404.000000,180852.000000,91200.000000,605.266480)}
{pt3dadd(190956.000000,181584.000000,90900.000000,630.022120)}
{pt3dadd(190944.000000,182328.000000,90825.000000,564.789002)}
{pt3dadd(190356.000000,183012.000000,90775.000000,564.789002)}
{pt3dadd(189612.000000,183528.000000,90900.000000,598.386106)}
{pt3dadd(189192.000000,184212.000000,90575.000000,591.766878)}
{pt3dadd(188748.000000,184872.000000,90425.000000,623.362056)}
{pt3dadd(188304.000000,185652.000000,90475.000000,613.718544)}
{pt3dadd(187620.000000,186264.000000,90225.000000,598.888692)}
{pt3dadd(187296.000000,187056.000000,90325.000000,560.587432)}
{pt3dadd(187092.000000,187788.000000,90200.000000,509.475588)}
{pt3dadd(186732.000000,188472.000000,90100.000000,489.602162)}
{pt3dadd(186336.000000,189060.000000,89800.000000,509.877656)}
{pt3dadd(185880.000000,189780.000000,89425.000000,505.397510)}
{pt3dadd(185436.000000,190332.000000,89000.000000,515.041022)}
{pt3dadd(185268.000000,191160.000000,89000.000000,523.371460)}
{pt3dadd(184968.000000,191748.000000,89050.000000,506.204066)}
{pt3dadd(185004.000000,192324.000000,89200.000000,490.632728)}
{pt3dadd(184656.000000,193248.000000,89125.000000,490.632728)}
{pt3dadd(184356.000000,193872.000000,89200.000000,485.693372)}
{pt3dadd(183612.000000,194808.000000,89050.000000,420.090418)}
{pt3dadd(183228.000000,195540.000000,88650.000000,378.040570)}
{pt3dadd(182892.000000,196296.000000,88575.000000,352.969886)}
{pt3dadd(182388.000000,197076.000000,88450.000000,344.639448)}
{pt3dadd(182256.000000,197724.000000,88375.000000,327.124708)}
{pt3dadd(181884.000000,198432.000000,88425.000000,384.397224)}
{pt3dadd(181464.000000,199188.000000,88475.000000,394.936520)}
{pt3dadd(181056.000000,199944.000000,88450.000000,399.912387)}
{pt3dadd(180480.000000,200688.000000,88125.000000,387.012000)}

{create adhoc4}
{access adhoc4}
{connect adhoc4(1), adhoc3(0)}
{nseg = 1}
{strdef color color = "White"}
{pt3dclear()}
{pt3dadd(180480.000000,200688.000000,88125.000000,387.012000)}
{pt3dadd(180144.000000,201504.000000,87775.000000,372.308910)}
{pt3dadd(179856.000000,202392.000000,87650.000000,353.927594)}
{pt3dadd(179508.000000,203376.000000,87600.000000,334.284054)}
{pt3dadd(179316.000000,204108.000000,87575.000000,319.154164)}
{pt3dadd(179016.000000,204756.000000,87425.000000,310.896354)}
{pt3dadd(178212.000000,205620.000000,87150.000000,289.288830)}
{pt3dadd(177552.000000,206136.000000,87000.000000,289.288830)}
{pt3dadd(176988.000000,206760.000000,86575.000000,308.932370)}
{pt3dadd(176232.000000,207732.000000,86000.000000,308.932370)}
{pt3dadd(175356.000000,209088.000000,85950.000000,301.798960)}
{pt3dadd(174900.000000,210048.000000,85550.000000,317.190180)}
{pt3dadd(174552.000000,210948.000000,85300.000000,293.514393)}
{pt3dadd(174192.000000,211524.000000,85325.000000,303.234000)}

{create adhoc5}
{access adhoc5}
{connect adhoc5(1), adhoc4(0)}
{nseg = 1}
{strdef color color = "White"}
{pt3dclear()}
{pt3dadd(174192.000000,211524.000000,85325.000000,303.234000)}
{pt3dadd(173832.000000,212304.000000,84500.000000,303.474673)}
{pt3dadd(173256.000000,212664.000000,83675.000000,268.388528)}
{pt3dadd(172356.000000,213432.000000,82875.000000,250.842280)}
{pt3dadd(171852.000000,214152.000000,82350.000000,222.622066)}
{pt3dadd(171312.000000,214992.000000,82050.000000,214.757480)}
{pt3dadd(171168.000000,215628.000000,81550.000000,208.595372)}
{pt3dadd(169476.000000,216720.000000,80775.000000,207.411127)}
{pt3dadd(168648.000000,216840.000000,80050.000000,195.467360)}

{create adhoc6}
{access adhoc6}
{connect adhoc6(1), adhoc5(0)}
{nseg = 1}
{strdef color color = "White"}
{pt3dclear()}
{pt3dadd(168648.000000,216840.000000,80050.000000,195.467360)}
{pt3dadd(167832.000000,217296.000000,79375.000000,195.467360)}
{pt3dadd(167688.000000,217524.000000,78750.000000,195.467360)}

{create adhoc7}
{access adhoc7}
{connect adhoc7(1), adhoc6(0)}
{nseg = 1}
{strdef color color = "White"}
{pt3dclear()}
{pt3dadd(167688.000000,217524.000000,78750.000000,195.467360)}
{pt3dadd(167316.000000,217548.000000,78075.000000,186.307137)}
{pt3dadd(166968.000000,217476.000000,77425.000000,191.464938)}
{pt3dadd(166368.000000,217656.000000,76900.000000,189.603346)}
{pt3dadd(165852.000000,218028.000000,76250.000000,183.002226)}
{pt3dadd(165372.000000,218292.000000,75875.000000,176.715446)}
{pt3dadd(165060.000000,218376.000000,75550.000000,166.428966)}
{pt3dadd(164736.000000,218712.000000,74975.000000,171.498550)}
{pt3dadd(164124.000000,219120.000000,74400.000000,163.438820)}
{pt3dadd(163716.000000,219648.000000,73825.000000,153.540163)}
{pt3dadd(163332.000000,219900.000000,73225.000000,144.112873)}
{pt3dadd(163092.000000,220692.000000,72850.000000,152.136573)}
{pt3dadd(162492.000000,221844.000000,72600.000000,162.423053)}
{pt3dadd(161904.000000,222420.000000,72250.000000,188.259343)}
{pt3dadd(161580.000000,222792.000000,71725.000000,246.303967)}
{pt3dadd(161088.000000,223020.000000,71525.000000,275.042200)}

{create adhoc8}
{access adhoc8}
{connect adhoc8(1), adhoc6(0)}
{nseg = 1}
{strdef color color = "White"}
{pt3dclear()}
{pt3dadd(167688.000000,217524.000000,78750.000000,195.467360)}
{pt3dadd(167148.000000,217980.000000,78500.000000,145.155787)}
{pt3dadd(167136.000000,218112.000000,78500.000000,129.002641)}
{pt3dadd(167088.000000,218220.000000,78475.000000,110.641272)}
{pt3dadd(167052.000000,218352.000000,78375.000000,102.111886)}
{pt3dadd(167112.000000,218448.000000,78425.000000,90.186477)}
{pt3dadd(167124.000000,218700.000000,78525.000000,77.353070)}

{create adhoc9}
{access adhoc9}
{connect adhoc9(1), adhoc5(0)}
{nseg = 1}
{strdef color color = "White"}
{pt3dclear()}
{pt3dadd(168648.000000,216840.000000,80050.000000,195.467360)}
{pt3dadd(169008.000000,217200.000000,80850.000000,145.251023)}
{pt3dadd(168996.000000,217440.000000,80825.000000,124.804643)}
{pt3dadd(168924.000000,217800.000000,81200.000000,110.911171)}
{pt3dadd(168948.000000,217908.000000,81250.000000,109.822737)}
{pt3dadd(168948.000000,218040.000000,81350.000000,106.391445)}
{pt3dadd(168936.000000,218112.000000,81425.000000,114.562360)}
{pt3dadd(168936.000000,218232.000000,81500.000000,108.843540)}

{create adhoc10}
{access adhoc10}
{connect adhoc10(1), adhoc4(0)}
{nseg = 1}
{strdef color color = "White"}
{pt3dclear()}
{pt3dadd(174192.000000,211524.000000,85325.000000,303.234000)}
{pt3dadd(173868.000000,211716.000000,85600.000000,293.836733)}
{pt3dadd(173712.000000,212040.000000,85825.000000,244.602592)}
{pt3dadd(173628.000000,212292.000000,85975.000000,213.127942)}
{pt3dadd(173412.000000,212676.000000,86050.000000,191.574614)}
{pt3dadd(173172.000000,213036.000000,86000.000000,186.460448)}
{pt3dadd(173028.000000,213108.000000,86100.000000,188.615476)}
{pt3dadd(173004.000000,213252.000000,86200.000000,189.875476)}
{pt3dadd(173112.000000,213828.000000,86300.000000,194.473736)}
{pt3dadd(173148.000000,214200.000000,86275.000000,183.163264)}
{pt3dadd(173148.000000,214428.000000,86250.000000,163.899750)}
{pt3dadd(173208.000000,214668.000000,86300.000000,155.876050)}
{pt3dadd(173328.000000,215088.000000,86425.000000,174.671630)}
{pt3dadd(173448.000000,215208.000000,86525.000000,176.360150)}
{pt3dadd(173580.000000,215376.000000,86650.000000,198.471424)}
{pt3dadd(173748.000000,215460.000000,86775.000000,208.888808)}
{pt3dadd(173796.000000,215616.000000,87000.000000,210.750400)}
{pt3dadd(173904.000000,215688.000000,87300.000000,194.666970)}
{pt3dadd(174096.000000,216012.000000,87600.000000,186.991040)}
{pt3dadd(174144.000000,216276.000000,87725.000000,156.841626)}
{pt3dadd(174168.000000,216420.000000,87775.000000,134.598110)}
{pt3dadd(174108.000000,216564.000000,87750.000000,111.748783)}
{pt3dadd(174024.000000,216732.000000,87725.000000,98.820778)}
{pt3dadd(174120.000000,217236.000000,87900.000000,88.094130)}
{pt3dadd(174144.000000,217524.000000,87975.000000,82.574404)}
{pt3dadd(174096.000000,217740.000000,88050.000000,85.281760)}

{create adhoc11}
{access adhoc11}
{connect adhoc11(1), adhoc3(0)}
{nseg = 1}
{strdef color color = "White"}
{pt3dclear()}
{pt3dadd(180480.000000,200688.000000,88125.000000,387.012000)}
{pt3dadd(179868.000000,200712.000000,87350.000000,212.658747)}
{pt3dadd(179676.000000,200724.000000,87075.000000,179.994716)}
{pt3dadd(179496.000000,200676.000000,86775.000000,123.324419)}
{pt3dadd(179424.000000,200664.000000,86550.000000,104.921841)}
{pt3dadd(179280.000000,200580.000000,86375.000000,120.818683)}
{pt3dadd(179160.000000,200592.000000,86050.000000,123.958333)}
{pt3dadd(179124.000000,200892.000000,85800.000000,131.361775)}
{pt3dadd(179064.000000,201096.000000,85575.000000,138.412672)}
{pt3dadd(178932.000000,201384.000000,85300.000000,146.556320)}
{pt3dadd(178788.000000,201576.000000,84925.000000,133.834729)}
{pt3dadd(178644.000000,201600.000000,84525.000000,118.868947)}
{pt3dadd(178464.000000,201660.000000,84325.000000,109.441657)}
{pt3dadd(178272.000000,201828.000000,83950.000000,101.403517)}
{pt3dadd(178104.000000,201960.000000,83550.000000,93.259869)}
{pt3dadd(177996.000000,202032.000000,83350.000000,97.119408)}
{pt3dadd(177864.000000,202116.000000,83050.000000,94.558925)}
{pt3dadd(177852.000000,202116.000000,82750.000000,91.870417)}
{pt3dadd(177852.000000,202176.000000,82550.000000,90.034726)}
{pt3dadd(177804.000000,202176.000000,82400.000000,89.222519)}
{pt3dadd(177708.000000,202308.000000,82225.000000,88.185914)}
{pt3dadd(177552.000000,202428.000000,82150.000000,98.401769)}
{pt3dadd(177312.000000,202500.000000,82025.000000,107.805417)}
{pt3dadd(177144.000000,202692.000000,81925.000000,108.700876)}
{pt3dadd(177000.000000,202836.000000,81900.000000,131.550203)}
{pt3dadd(176844.000000,202980.000000,81900.000000,148.049980)}
{pt3dadd(176712.000000,203112.000000,81825.000000,158.821860)}
{pt3dadd(176532.000000,203184.000000,81700.000000,166.132270)}
{pt3dadd(176328.000000,203256.000000,81625.000000,188.375786)}
{pt3dadd(176172.000000,203412.000000,81475.000000,183.052724)}
{pt3dadd(175932.000000,203532.000000,81300.000000,179.591254)}
{pt3dadd(175716.000000,203604.000000,81175.000000,162.104234)}
{pt3dadd(175380.000000,203484.000000,80950.000000,144.577969)}
{pt3dadd(175140.000000,203532.000000,80775.000000,128.729825)}
{pt3dadd(174624.000000,203496.000000,80650.000000,136.007559)}
{pt3dadd(174468.000000,203352.000000,80550.000000,137.487149)}
{pt3dadd(174252.000000,203268.000000,80475.000000,205.240720)}

{create adhoc12}
{access adhoc12}
{connect adhoc12(1), adhoc2(0)}
{nseg = 1}
{strdef color color = "White"}
{pt3dclear()}
{pt3dadd(191508.000000,167484.000000,90625.000000,766.257260)}
{pt3dadd(191316.000000,167688.000000,90275.000000,708.809283)}
{pt3dadd(191244.000000,168348.000000,89925.000000,627.799438)}
{pt3dadd(191244.000000,168540.000000,89650.000000,559.884132)}
{pt3dadd(191220.000000,168600.000000,89400.000000,491.332760)}
{pt3dadd(191172.000000,168864.000000,89175.000000,446.524930)}
{pt3dadd(191184.000000,169296.000000,89075.000000,420.200718)}
{pt3dadd(191184.000000,169500.000000,88900.000000,411.016416)}
{pt3dadd(191160.000000,169896.000000,88700.000000,406.952786)}
{pt3dadd(191088.000000,170076.000000,88475.000000,423.633486)}
{pt3dadd(191016.000000,170460.000000,88175.000000,431.963924)}
{pt3dadd(191016.000000,170712.000000,87925.000000,435.834040)}
{pt3dadd(190980.000000,170952.000000,87675.000000,419.947658)}
{pt3dadd(190920.000000,171384.000000,87275.000000,424.011288)}
{pt3dadd(190752.000000,171708.000000,87050.000000,424.011288)}
{pt3dadd(190644.000000,171912.000000,86825.000000,433.195590)}
{pt3dadd(190500.000000,172248.000000,86550.000000,450.710330)}
{pt3dadd(190200.000000,172620.000000,86300.000000,480.720370)}
{pt3dadd(189996.000000,172908.000000,86100.000000,469.100796)}
{pt3dadd(189756.000000,173172.000000,85875.000000,448.734268)}
{pt3dadd(189468.000000,173352.000000,85600.000000,416.810116)}
{pt3dadd(189228.000000,173460.000000,85400.000000,391.739432)}
{pt3dadd(188868.000000,173724.000000,85200.000000,365.415220)}
{pt3dadd(188772.000000,173856.000000,85200.000000,361.904904)}
{pt3dadd(188568.000000,173880.000000,84950.000000,361.904904)}
{pt3dadd(188208.000000,174024.000000,84825.000000,376.314316)}
{pt3dadd(188052.000000,174084.000000,84750.000000,392.200698)}
{pt3dadd(187884.000000,174144.000000,84700.000000,408.881398)}
{pt3dadd(187716.000000,174204.000000,84700.000000,437.462398)}
{pt3dadd(187632.000000,174264.000000,84600.000000,462.533082)}
{pt3dadd(187536.000000,174324.000000,84600.000000,470.863520)}
{pt3dadd(187452.000000,174384.000000,84600.000000,470.863520)}
{pt3dadd(187236.000000,174504.000000,84400.000000,475.567676)}
{pt3dadd(187044.000000,174612.000000,84400.000000,458.052936)}
{pt3dadd(186840.000000,174732.000000,84400.000000,417.024540)}
{pt3dadd(186744.000000,174768.000000,84000.000000,408.694102)}
{pt3dadd(186588.000000,175128.000000,83750.000000,396.493548)}
{pt3dadd(186420.000000,175332.000000,83550.000000,360.722960)}
{pt3dadd(186312.000000,175596.000000,83300.000000,387.012000)}

{create adhoc13}
{access adhoc13}
{connect adhoc13(1), adhoc12(0)}
{nseg = 1}
{strdef color color = "White"}
{pt3dclear()}
{pt3dadd(186312.000000,175596.000000,83300.000000,387.012000)}
{pt3dadd(186156.000000,175272.000000,83050.000000,352.942953)}
{pt3dadd(186060.000000,175296.000000,82750.000000,253.696386)}
{pt3dadd(186144.000000,175128.000000,82500.000000,192.538131)}
{pt3dadd(186228.000000,174996.000000,82350.000000,96.957932)}
{pt3dadd(186228.000000,174888.000000,82175.000000,81.220726)}

{create adhoc14}
{access adhoc14}
{connect adhoc14(1), adhoc12(0)}
{nseg = 1}
{strdef color color = "White"}
{pt3dclear()}
{pt3dadd(186312.000000,175596.000000,83300.000000,387.012000)}
{pt3dadd(186204.000000,175752.000000,83025.000000,395.352683)}
{pt3dadd(186048.000000,176136.000000,82625.000000,372.372870)}
{pt3dadd(185736.000000,176316.000000,82350.000000,368.687042)}
{pt3dadd(185544.000000,176448.000000,82100.000000,342.763232)}
{pt3dadd(185364.000000,176580.000000,82100.000000,333.203776)}
{pt3dadd(185208.000000,176772.000000,81950.000000,319.480520)}
{pt3dadd(185040.000000,176988.000000,81825.000000,335.438232)}
{pt3dadd(184932.000000,177108.000000,81700.000000,328.584764)}
{pt3dadd(184824.000000,177240.000000,81625.000000,346.178136)}
{pt3dadd(184704.000000,177384.000000,81625.000000,359.247908)}
{pt3dadd(184596.000000,177516.000000,81475.000000,362.431868)}
{pt3dadd(184524.000000,177696.000000,81400.000000,366.117696)}
{pt3dadd(184428.000000,177828.000000,81325.000000,376.656992)}
{pt3dadd(184296.000000,178200.000000,81125.000000,369.101048)}
{pt3dadd(184104.000000,178416.000000,80950.000000,365.590732)}
{pt3dadd(183960.000000,178680.000000,80750.000000,380.000144)}
{pt3dadd(183780.000000,178788.000000,80675.000000,387.933890)}
{pt3dadd(183612.000000,178968.000000,80525.000000,387.933890)}
{pt3dadd(183480.000000,179136.000000,80325.000000,395.489834)}
{pt3dadd(183288.000000,179292.000000,80150.000000,419.366678)}
{pt3dadd(183120.000000,179400.000000,80025.000000,421.263360)}
{pt3dadd(182892.000000,179556.000000,79800.000000,470.415500)}

{create adhoc15}
{access adhoc15}
{connect adhoc15(1), adhoc14(0)}
{nseg = 1}
{strdef color color = "White"}
{pt3dclear()}
{pt3dadd(182892.000000,179556.000000,79800.000000,470.415500)}
{pt3dadd(182808.000000,179724.000000,79800.000000,455.837243)}
{pt3dadd(182724.000000,180000.000000,79650.000000,407.228554)}
{pt3dadd(182688.000000,180252.000000,79575.000000,360.663814)}
{pt3dadd(182604.000000,180624.000000,79500.000000,325.221942)}
{pt3dadd(182580.000000,180840.000000,79350.000000,278.657202)}
{pt3dadd(182508.000000,180972.000000,79325.000000,254.894650)}
{pt3dadd(182472.000000,181236.000000,79325.000000,248.678346)}
{pt3dadd(182412.000000,181488.000000,79125.000000,274.876558)}
{pt3dadd(182364.000000,181752.000000,78950.000000,279.990724)}
{pt3dadd(182196.000000,181968.000000,78650.000000,302.678620)}
{pt3dadd(182136.000000,182124.000000,78475.000000,314.586508)}
{pt3dadd(181920.000000,182244.000000,78350.000000,343.542662)}
{pt3dadd(181692.000000,182340.000000,78200.000000,355.162236)}
{pt3dadd(181668.000000,182508.000000,77950.000000,367.016900)}
{pt3dadd(181608.000000,182592.000000,77600.000000,354.569504)}
{pt3dadd(181392.000000,182856.000000,77300.000000,349.930183)}
{pt3dadd(181332.000000,183084.000000,77050.000000,288.794300)}

{create adhoc16}
{access adhoc16}
{connect adhoc16(1), adhoc15(0)}
{nseg = 1}
{strdef color color = "White"}
{pt3dclear()}
{pt3dadd(181332.000000,183084.000000,77050.000000,288.794300)}
{pt3dadd(181128.000000,183408.000000,76875.000000,283.129240)}
{pt3dadd(180996.000000,183720.000000,76825.000000,294.203488)}
{pt3dadd(180852.000000,184032.000000,76825.000000,300.123772)}
{pt3dadd(180744.000000,184356.000000,76800.000000,321.731296)}
{pt3dadd(180600.000000,184572.000000,76725.000000,312.627052)}
{pt3dadd(180516.000000,184836.000000,76575.000000,306.706768)}
{pt3dadd(180408.000000,185052.000000,76525.000000,293.578328)}
{pt3dadd(180240.000000,185232.000000,76500.000000,259.071334)}
{pt3dadd(180144.000000,185412.000000,76350.000000,218.668230)}
{pt3dadd(180024.000000,185592.000000,76250.000000,198.141250)}
{pt3dadd(179988.000000,185772.000000,76200.000000,198.141250)}
{pt3dadd(179856.000000,186024.000000,76050.000000,214.302034)}
{pt3dadd(179700.000000,186204.000000,75900.000000,237.518874)}
{pt3dadd(179652.000000,186360.000000,75825.000000,271.705674)}
{pt3dadd(179448.000000,186480.000000,75800.000000,286.862784)}
{pt3dadd(179340.000000,186552.000000,75800.000000,278.998198)}
{pt3dadd(179256.000000,186672.000000,75550.000000,258.419606)}
{pt3dadd(179124.000000,186804.000000,75550.000000,249.131168)}
{pt3dadd(179064.000000,186972.000000,75525.000000,231.584920)}
{pt3dadd(178980.000000,187104.000000,75500.000000,226.714290)}
{pt3dadd(178884.000000,187260.000000,75475.000000,224.338376)}
{pt3dadd(178788.000000,187416.000000,75475.000000,226.493404)}
{pt3dadd(178704.000000,187572.000000,75475.000000,228.648432)}
{pt3dadd(178608.000000,187728.000000,75475.000000,233.066240)}
{pt3dadd(178548.000000,187896.000000,75475.000000,237.936870)}
{pt3dadd(178500.000000,188076.000000,75475.000000,240.312784)}
{pt3dadd(178440.000000,188268.000000,75475.000000,276.329720)}
{pt3dadd(178332.000000,188484.000000,75475.000000,308.476540)}
{pt3dadd(178272.000000,188640.000000,75400.000000,315.966620)}
{pt3dadd(178284.000000,188844.000000,75300.000000,308.833210)}
{pt3dadd(178248.000000,188952.000000,75275.000000,302.039488)}
{pt3dadd(178044.000000,189708.000000,75200.000000,257.998852)}
{pt3dadd(177924.000000,189936.000000,75175.000000,217.828332)}
{pt3dadd(177828.000000,190068.000000,75175.000000,200.051772)}
{pt3dadd(177756.000000,190224.000000,75175.000000,200.051772)}
{pt3dadd(177672.000000,190380.000000,75175.000000,220.630364)}
{pt3dadd(177588.000000,190524.000000,75125.000000,230.916844)}
{pt3dadd(177516.000000,190776.000000,74950.000000,254.331764)}
{pt3dadd(177324.000000,191064.000000,74700.000000,264.618244)}
{pt3dadd(177084.000000,191364.000000,74650.000000,286.225768)}
{pt3dadd(176904.000000,191808.000000,74625.000000,277.555064)}
{pt3dadd(176856.000000,192036.000000,74575.000000,282.425694)}
{pt3dadd(176712.000000,192252.000000,74500.000000,279.537754)}
{pt3dadd(176508.000000,192684.000000,74450.000000,289.778254)}
{pt3dadd(176268.000000,192744.000000,74375.000000,286.594294)}
{pt3dadd(176004.000000,192924.000000,74250.000000,305.302426)}
{pt3dadd(175776.000000,193188.000000,74100.000000,305.302426)}
{pt3dadd(175584.000000,193548.000000,73900.000000,286.637038)}
{pt3dadd(175380.000000,193836.000000,73675.000000,261.040474)}
{pt3dadd(175308.000000,194136.000000,73550.000000,231.131740)}
{pt3dadd(175248.000000,194280.000000,73550.000000,207.309442)}
{pt3dadd(175104.000000,194364.000000,73425.000000,209.928892)}
{pt3dadd(174816.000000,194532.000000,73150.000000,213.935972)}
{pt3dadd(174456.000000,194748.000000,72875.000000,229.292036)}
{pt3dadd(174300.000000,194964.000000,72675.000000,250.530066)}
{pt3dadd(174084.000000,195180.000000,72300.000000,264.314936)}
{pt3dadd(173784.000000,195312.000000,72075.000000,279.512752)}
{pt3dadd(173256.000000,195600.000000,71625.000000,314.823067)}
{pt3dadd(172956.000000,195864.000000,71700.000000,351.031280)}

{create adhoc17}
{access adhoc17}
{connect adhoc17(1), adhoc15(0)}
{nseg = 1}
{strdef color color = "White"}
{pt3dclear()}
{pt3dadd(181332.000000,183084.000000,77050.000000,288.794300)}
{pt3dadd(181464.000000,182928.000000,77000.000000,402.408190)}
{pt3dadd(181644.000000,182784.000000,76975.000000,312.447204)}
{pt3dadd(181740.000000,182544.000000,76950.000000,283.860494)}
{pt3dadd(181764.000000,182412.000000,76875.000000,220.717540)}
{pt3dadd(181764.000000,182232.000000,76650.000000,153.094440)}
{pt3dadd(181764.000000,182184.000000,76425.000000,138.719702)}
{pt3dadd(181740.000000,182124.000000,76175.000000,127.806434)}
{pt3dadd(181668.000000,182052.000000,76000.000000,120.290473)}
{pt3dadd(181644.000000,181992.000000,75825.000000,114.285710)}

{create adhoc18}
{access adhoc18}
{connect adhoc18(1), adhoc14(0)}
{nseg = 1}
{strdef color color = "White"}
{pt3dclear()}
{pt3dadd(182892.000000,179556.000000,79800.000000,470.415500)}
{pt3dadd(182688.000000,179376.000000,79650.000000,304.416007)}
{pt3dadd(182484.000000,179220.000000,79425.000000,234.678896)}
{pt3dadd(182280.000000,179016.000000,79200.000000,160.340656)}
{pt3dadd(182040.000000,178812.000000,78950.000000,133.554399)}
{pt3dadd(181800.000000,178728.000000,78650.000000,113.238358)}
{pt3dadd(181620.000000,178668.000000,78475.000000,102.015110)}
{pt3dadd(181404.000000,178632.000000,78050.000000,103.660515)}

{create adhoc19}
{access adhoc19}
{connect adhoc19(1), adhoc1(0)}
{nseg = 1}
{strdef color color = "White"}
{pt3dclear()}
{pt3dadd(191916.000000,164844.000000,91050.000000,804.570100)}
{pt3dadd(192312.000000,163932.000000,91400.000000,720.503280)}
{pt3dadd(193332.000000,162240.000000,92325.000000,787.539798)}
{pt3dadd(194016.000000,161256.000000,92975.000000,779.877230)}
{pt3dadd(194280.000000,160608.000000,93800.000000,773.258002)}
{pt3dadd(194064.000000,159660.000000,94125.000000,801.787662)}
{pt3dadd(194256.000000,158712.000000,94350.000000,786.079384)}
{pt3dadd(193968.000000,157968.000000,94675.000000,732.185644)}
{pt3dadd(193800.000000,157188.000000,94800.000000,705.014538)}
{pt3dadd(193488.000000,156648.000000,95725.000000,718.583950)}
{pt3dadd(193188.000000,155868.000000,96150.000000,726.629660)}
{pt3dadd(192792.000000,155160.000000,96600.000000,742.337938)}
{pt3dadd(192732.000000,154224.000000,96950.000000,806.455387)}
{pt3dadd(193656.000000,153540.000000,97575.000000,844.798650)}

{create adhoc20}
{access adhoc20}
{connect adhoc20(1), adhoc19(0)}
{nseg = 1}
{strdef color color = "White"}
{pt3dclear()}
{pt3dadd(193656.000000,153540.000000,97575.000000,844.798650)}
{pt3dadd(193476.000000,152856.000000,98300.000000,745.496437)}
{pt3dadd(193560.000000,152556.000000,99225.000000,699.758742)}
{pt3dadd(193032.000000,151932.000000,100175.000000,656.879358)}
{pt3dadd(192768.000000,151668.000000,100925.000000,614.652198)}
{pt3dadd(192768.000000,151404.000000,101650.000000,591.180790)}
{pt3dadd(192600.000000,151164.000000,102525.000000,526.112710)}
{pt3dadd(192708.000000,150984.000000,103375.000000,457.407494)}
{pt3dadd(192792.000000,150852.000000,104200.000000,416.663294)}
{pt3dadd(192924.000000,150996.000000,105000.000000,439.017028)}
{pt3dadd(193056.000000,151068.000000,105975.000000,469.107664)}
{pt3dadd(193392.000000,151476.000000,106925.000000,540.179570)}
{pt3dadd(193440.000000,151932.000000,107750.000000,575.287682)}
{pt3dadd(193236.000000,152676.000000,108675.000000,563.668108)}
{pt3dadd(192924.000000,153036.000000,109525.000000,531.670862)}
{pt3dadd(192372.000000,153156.000000,110250.000000,496.393886)}
{pt3dadd(192300.000000,153168.000000,111050.000000,451.586056)}
{pt3dadd(192360.000000,153588.000000,111675.000000,539.076900)}
{pt3dadd(191556.000000,153312.000000,112675.000000,691.782528)}
{pt3dadd(190764.000000,152916.000000,113600.000000,775.107148)}
{pt3dadd(188904.000000,153108.000000,115525.000000,832.294556)}
{pt3dadd(187896.000000,153420.000000,116800.000000,896.975812)}
{pt3dadd(186600.000000,153396.000000,118050.000000,849.701300)}
{pt3dadd(185832.000000,153708.000000,119025.000000,769.232872)}
{pt3dadd(185040.000000,153972.000000,119925.000000,745.076604)}
{pt3dadd(184920.000000,153900.000000,120525.000000,745.076604)}
{pt3dadd(184176.000000,154560.000000,121000.000000,768.082562)}
{pt3dadd(183360.000000,154056.000000,121900.000000,775.032746)}
{pt3dadd(181800.000000,153360.000000,122200.000000,798.038704)}
{pt3dadd(181752.000000,154140.000000,123000.000000,790.741024)}
{pt3dadd(179604.000000,153516.000000,124200.000000,807.234724)}
{pt3dadd(178164.000000,153240.000000,125400.000000,815.682714)}
{pt3dadd(176880.000000,152592.000000,125950.000000,875.100542)}
{pt3dadd(175956.000000,151884.000000,126475.000000,875.100542)}
{pt3dadd(173916.000000,152136.000000,127100.000000,955.568970)}
{pt3dadd(173124.000000,152100.000000,127675.000000,1004.583450)}
{pt3dadd(171696.000000,152076.000000,128225.000000,1013.453830)}
{pt3dadd(170724.000000,152100.000000,128050.000000,994.360330)}
{pt3dadd(169800.000000,152316.000000,128175.000000,971.354372)}
{pt3dadd(168444.000000,152868.000000,128300.000000,922.339892)}
{pt3dadd(167400.000000,153084.000000,128450.000000,828.302052)}
{pt3dadd(166308.000000,153708.000000,128400.000000,774.408312)}
{pt3dadd(165204.000000,154284.000000,128425.000000,702.488806)}
{pt3dadd(164460.000000,154308.000000,129075.000000,682.615380)}
{pt3dadd(163296.000000,154800.000000,129275.000000,651.161432)}
{pt3dadd(161976.000000,154908.000000,129300.000000,644.857418)}
{pt3dadd(160356.000000,155904.000000,129650.000000,665.724510)}
{pt3dadd(158940.000000,156696.000000,130125.000000,708.809283)}
{pt3dadd(157668.000000,157296.000000,130350.000000,766.257260)}

{create adhoc21}
{access adhoc21}
{connect adhoc21(1), adhoc20(0)}
{nseg = 1}
{strdef color color = "White"}
{pt3dclear()}
{pt3dadd(157668.000000,157296.000000,130350.000000,766.257260)}
{pt3dadd(156360.000000,158736.000000,130525.000000,666.657343)}
{pt3dadd(155520.000000,159372.000000,130975.000000,634.987704)}
{pt3dadd(154200.000000,160500.000000,131225.000000,601.812772)}
{pt3dadd(153348.000000,160872.000000,131000.000000,619.838538)}
{pt3dadd(152388.000000,161820.000000,131175.000000,626.457766)}
{pt3dadd(151716.000000,162456.000000,131000.000000,599.164676)}
{pt3dadd(150960.000000,163200.000000,131125.000000,593.978336)}
{pt3dadd(148416.000000,165108.000000,131275.000000,563.504770)}
{pt3dadd(147288.000000,165840.000000,131500.000000,545.479004)}
{pt3dadd(146568.000000,165996.000000,132200.000000,483.877816)}
{pt3dadd(145236.000000,166608.000000,133000.000000,466.363076)}
{pt3dadd(144156.000000,167124.000000,133425.000000,447.972610)}
{pt3dadd(143328.000000,167664.000000,133525.000000,443.705802)}
{pt3dadd(142440.000000,168744.000000,133775.000000,418.950162)}
{pt3dadd(141684.000000,169632.000000,133525.000000,422.820278)}
{pt3dadd(140880.000000,170184.000000,133925.000000,431.150716)}
{pt3dadd(139956.000000,170832.000000,134700.000000,416.020826)}
{pt3dadd(139164.000000,171480.000000,135450.000000,400.890936)}
{pt3dadd(138648.000000,171744.000000,136225.000000,396.624128)}
{pt3dadd(138504.000000,172572.000000,136800.000000,400.687758)}
{pt3dadd(138624.000000,173052.000000,137375.000000,414.811416)}
{pt3dadd(138888.000000,173580.000000,138300.000000,418.321732)}
{pt3dadd(138624.000000,173892.000000,138975.000000,437.718430)}
{pt3dadd(137832.000000,175008.000000,139575.000000,451.169540)}
{pt3dadd(137196.000000,175848.000000,140100.000000,464.620650)}
{pt3dadd(136680.000000,176568.000000,140625.000000,459.681294)}
{pt3dadd(136164.000000,177696.000000,141275.000000,475.567676)}
{pt3dadd(136140.000000,177996.000000,141850.000000,459.681294)}
{pt3dadd(135840.000000,178596.000000,142525.000000,450.496992)}
{pt3dadd(135648.000000,179424.000000,143325.000000,425.426308)}
{pt3dadd(134928.000000,179556.000000,143925.000000,400.355624)}
{pt3dadd(134436.000000,179724.000000,144650.000000,396.088816)}
{pt3dadd(134028.000000,179772.000000,145375.000000,396.088816)}
{pt3dadd(133776.000000,179664.000000,146025.000000,383.888262)}
{pt3dadd(133020.000000,179640.000000,146675.000000,373.850834)}
{pt3dadd(132852.000000,179556.000000,147425.000000,370.340518)}
{pt3dadd(131964.000000,180132.000000,148100.000000,337.393362)}
{pt3dadd(131004.000000,180132.000000,148800.000000,330.539894)}
{pt3dadd(130284.000000,180552.000000,149625.000000,298.393074)}
{pt3dadd(129228.000000,180564.000000,150200.000000,312.116330)}
{pt3dadd(128424.000000,180660.000000,151025.000000,315.626646)}
{pt3dadd(127164.000000,180756.000000,151575.000000,336.954228)}
{pt3dadd(125904.000000,180684.000000,152150.000000,336.954228)}
{pt3dadd(124404.000000,180156.000000,152800.000000,349.457508)}
{pt3dadd(122256.000000,179760.000000,153450.000000,342.261364)}
{pt3dadd(121464.000000,179556.000000,153400.000000,335.407896)}
{pt3dadd(120744.000000,179484.000000,153475.000000,325.370468)}
{pt3dadd(119796.000000,179556.000000,153475.000000,322.186508)}
{pt3dadd(119184.000000,179532.000000,153375.000000,303.521120)}
{pt3dadd(118416.000000,179400.000000,153350.000000,314.587380)}
{pt3dadd(116256.000000,179328.000000,153900.000000,300.113266)}
{pt3dadd(114576.000000,179160.000000,154400.000000,283.952482)}
{pt3dadd(113076.000000,179424.000000,154725.000000,280.920138)}
{pt3dadd(112428.000000,179424.000000,154850.000000,323.099182)}
{pt3dadd(111288.000000,179676.000000,154700.000000,331.429620)}
{pt3dadd(110640.000000,179772.000000,154575.000000,393.399224)}
{pt3dadd(109932.000000,179784.000000,154525.000000,416.087120)}
{pt3dadd(108804.000000,179808.000000,154425.000000,429.156892)}
{pt3dadd(106536.000000,180396.000000,153775.000000,414.747480)}
{pt3dadd(105696.000000,180312.000000,153675.000000,385.791326)}
{pt3dadd(104748.000000,180396.000000,153725.000000,335.111876)}
{pt3dadd(103932.000000,180384.000000,153500.000000,314.799894)}
{pt3dadd(103116.000000,180540.000000,153650.000000,311.289578)}
{pt3dadd(102300.000000,180408.000000,153700.000000,321.828874)}
{pt3dadd(101364.000000,180780.000000,153725.000000,346.518220)}
{pt3dadd(100344.000000,180288.000000,153450.000000,364.111592)}
{pt3dadd(99528.000000,179988.000000,153150.000000,353.310790)}
{pt3dadd(98616.000000,179724.000000,152925.000000,346.783678)}
{pt3dadd(97092.000000,180216.000000,152375.000000,346.783678)}
{pt3dadd(94764.000000,179568.000000,151950.000000,338.849932)}
{pt3dadd(93732.000000,179244.000000,152000.000000,356.364672)}
{pt3dadd(92556.000000,179268.000000,151950.000000,416.058456)}
{pt3dadd(91452.000000,179520.000000,151975.000000,426.095884)}
{pt3dadd(90432.000000,179868.000000,152150.000000,422.410056)}
{pt3dadd(89508.000000,179508.000000,152250.000000,418.724228)}
{pt3dadd(88512.000000,179220.000000,152400.000000,386.800076)}
{pt3dadd(87600.000000,178932.000000,152650.000000,358.219076)}
{pt3dadd(87000.000000,178656.000000,152725.000000,398.861098)}
{pt3dadd(86268.000000,178440.000000,152775.000000,439.503120)}
{pt3dadd(85224.000000,178368.000000,153125.000000,429.465692)}
{pt3dadd(84072.000000,178344.000000,153400.000000,412.496862)}
{pt3dadd(83076.000000,178332.000000,153900.000000,397.299046)}
{pt3dadd(80640.000000,178176.000000,154650.000000,340.699312)}
{pt3dadd(78936.000000,177876.000000,155275.000000,284.099578)}
{pt3dadd(77520.000000,177816.000000,155375.000000,281.067234)}
{pt3dadd(77448.000000,177408.000000,155425.000000,278.691320)}
{pt3dadd(76536.000000,177624.000000,155975.000000,266.783432)}
{pt3dadd(75648.000000,177504.000000,156575.000000,252.109520)}
{pt3dadd(75336.000000,177336.000000,157075.000000,215.502760)}

{create adhoc22}
{access adhoc22}
{connect adhoc22(1), adhoc20(0)}
{nseg = 1}
{strdef color color = "White"}
{pt3dclear()}
{pt3dadd(157668.000000,157296.000000,130350.000000,766.257260)}
{pt3dadd(156492.000000,157164.000000,130150.000000,526.649997)}
{pt3dadd(155124.000000,158352.000000,130150.000000,529.135848)}
{pt3dadd(153492.000000,159492.000000,130675.000000,461.220542)}
{pt3dadd(152172.000000,160584.000000,130825.000000,477.901242)}
{pt3dadd(148956.000000,162816.000000,131625.000000,482.168050)}
{pt3dadd(147276.000000,164340.000000,131875.000000,492.293746)}
{pt3dadd(146352.000000,164712.000000,132075.000000,531.186604)}
{pt3dadd(145500.000000,164904.000000,132400.000000,606.764478)}
{pt3dadd(144156.000000,165612.000000,133450.000000,705.130707)}
{pt3dadd(143076.000000,166212.000000,134200.000000,804.570100)}

{create adhoc23}
{access adhoc23}
{connect adhoc23(1), adhoc22(0)}
{nseg = 1}
{strdef color color = "White"}
{pt3dclear()}
{pt3dadd(143076.000000,166212.000000,134200.000000,804.570100)}
{pt3dadd(142248.000000,165888.000000,134500.000000,566.866547)}
{pt3dadd(141300.000000,164172.000000,135000.000000,612.154046)}
{pt3dadd(139860.000000,162492.000000,136550.000000,521.446282)}
{pt3dadd(139080.000000,162492.000000,137325.000000,492.490128)}
{pt3dadd(138336.000000,161616.000000,137700.000000,457.895614)}
{pt3dadd(137388.000000,161292.000000,137950.000000,375.620986)}
{pt3dadd(136092.000000,160884.000000,137700.000000,313.219784)}
{pt3dadd(135156.000000,160284.000000,137625.000000,309.876632)}
{pt3dadd(134244.000000,160152.000000,137650.000000,326.632232)}
{pt3dadd(132876.000000,159876.000000,137025.000000,361.226746)}
{pt3dadd(130752.000000,158628.000000,136450.000000,382.883748)}
{pt3dadd(128388.000000,158280.000000,136025.000000,389.410860)}
{pt3dadd(124668.000000,157680.000000,135525.000000,392.754012)}
{pt3dadd(123900.000000,157512.000000,136000.000000,375.998412)}
{pt3dadd(122976.000000,157896.000000,135950.000000,325.488930)}
{pt3dadd(121944.000000,158112.000000,136125.000000,283.244213)}
{pt3dadd(121068.000000,158112.000000,136725.000000,195.467360)}

{create adhoc24}
{access adhoc24}
{connect adhoc24(1), adhoc23(0)}
{nseg = 1}
{strdef color color = "White"}
{pt3dclear()}
{pt3dadd(121068.000000,158112.000000,136725.000000,195.467360)}
{pt3dadd(119988.000000,158700.000000,135675.000000,233.340827)}
{pt3dadd(119820.000000,159168.000000,134950.000000,233.340827)}
{pt3dadd(119580.000000,159636.000000,134250.000000,195.467360)}

{create adhoc25}
{access adhoc25}
{connect adhoc25(1), adhoc23(0)}
{nseg = 1}
{strdef color color = "White"}
{pt3dclear()}
{pt3dadd(121068.000000,158112.000000,136725.000000,195.467360)}
{pt3dadd(121092.000000,158148.000000,136925.000000,156.067020)}
{pt3dadd(121092.000000,158088.000000,137075.000000,148.714952)}
{pt3dadd(121164.000000,158016.000000,137250.000000,143.798980)}
{pt3dadd(121224.000000,158028.000000,137400.000000,147.001674)}
{pt3dadd(121308.000000,157944.000000,137550.000000,147.377746)}
{pt3dadd(121392.000000,157944.000000,137700.000000,153.838343)}
{pt3dadd(121368.000000,157872.000000,137875.000000,134.921190)}

{create adhoc26}
{access adhoc26}
{connect adhoc26(1), adhoc22(0)}
{nseg = 1}
{strdef color color = "White"}
{pt3dclear()}
{pt3dadd(143076.000000,166212.000000,134200.000000,804.570100)}
{pt3dadd(141936.000000,167652.000000,134100.000000,614.357047)}
{pt3dadd(141396.000000,168648.000000,134600.000000,609.911540)}
{pt3dadd(140700.000000,170208.000000,135075.000000,557.910472)}
{pt3dadd(140028.000000,171540.000000,135925.000000,585.203562)}
{pt3dadd(139368.000000,172896.000000,136175.000000,608.674970)}
{pt3dadd(138612.000000,173688.000000,136325.000000,608.674970)}
{pt3dadd(137832.000000,174648.000000,137225.000000,651.415110)}
{pt3dadd(137796.000000,174972.000000,137950.000000,661.921800)}

{create adhoc27}
{access adhoc27}
{connect adhoc27(1), adhoc26(0)}
{nseg = 1}
{strdef color color = "White"}
{pt3dclear()}
{pt3dadd(137796.000000,174972.000000,137950.000000,661.921800)}
{pt3dadd(138216.000000,173616.000000,138450.000000,478.523767)}
{pt3dadd(138240.000000,172596.000000,139275.000000,470.415500)}

{create adhoc28}
{access adhoc28}
{connect adhoc28(1), adhoc27(0)}
{nseg = 1}
{strdef color color = "White"}
{pt3dclear()}
{pt3dadd(138240.000000,172596.000000,139275.000000,470.415500)}
{pt3dadd(139776.000000,170724.000000,139975.000000,284.014087)}
{pt3dadd(140280.000000,170244.000000,140575.000000,277.805882)}
{pt3dadd(140832.000000,169368.000000,141275.000000,247.401926)}
{pt3dadd(140964.000000,168480.000000,141850.000000,291.442562)}
{pt3dadd(141720.000000,167172.000000,142725.000000,297.604670)}
{pt3dadd(141912.000000,166560.000000,143100.000000,297.604670)}
{pt3dadd(142500.000000,166368.000000,143725.000000,290.471260)}
{pt3dadd(141828.000000,165276.000000,144275.000000,284.550976)}
{pt3dadd(141600.000000,165192.000000,144925.000000,237.048870)}
{pt3dadd(141672.000000,165264.000000,145575.000000,241.687564)}
{pt3dadd(141264.000000,164892.000000,146150.000000,229.779676)}
{pt3dadd(140376.000000,164304.000000,146775.000000,232.042456)}
{pt3dadd(140304.000000,164988.000000,147450.000000,237.962740)}
{pt3dadd(139716.000000,165216.000000,148075.000000,251.710690)}
{pt3dadd(139140.000000,164676.000000,148625.000000,244.916968)}
{pt3dadd(139236.000000,164340.000000,149225.000000,262.463216)}
{pt3dadd(138984.000000,163968.000000,149725.000000,255.993000)}
{pt3dadd(138300.000000,163680.000000,150375.000000,242.208130)}
{pt3dadd(137580.000000,163488.000000,151000.000000,247.078760)}
{pt3dadd(137064.000000,162972.000000,151525.000000,253.872482)}
{pt3dadd(136380.000000,162876.000000,152100.000000,245.614672)}
{pt3dadd(136044.000000,162156.000000,152675.000000,254.460802)}
{pt3dadd(135624.000000,162132.000000,153225.000000,247.667080)}
{pt3dadd(135036.000000,162192.000000,153775.000000,250.286530)}
{pt3dadd(134928.000000,162240.000000,154450.000000,247.910616)}
{pt3dadd(134436.000000,162288.000000,155075.000000,238.622178)}
{pt3dadd(134340.000000,162324.000000,155675.000000,241.116894)}
{pt3dadd(133860.000000,161916.000000,156250.000000,239.064486)}
{pt3dadd(133452.000000,161880.000000,156825.000000,269.392192)}
{pt3dadd(133284.000000,161832.000000,157325.000000,279.632692)}
{pt3dadd(132804.000000,161580.000000,158175.000000,270.302550)}
{pt3dadd(132312.000000,161364.000000,158725.000000,281.592704)}
{pt3dadd(131808.000000,161244.000000,159250.000000,317.946960)}
{pt3dadd(131352.000000,161376.000000,159825.000000,273.658958)}
{pt3dadd(130380.000000,161268.000000,160475.000000,253.131978)}
{pt3dadd(130056.000000,160872.000000,161150.000000,258.455040)}
{pt3dadd(129588.000000,160668.000000,161775.000000,268.492468)}
{pt3dadd(128832.000000,160416.000000,162350.000000,240.984342)}
{pt3dadd(128352.000000,160380.000000,162950.000000,237.168078)}
{pt3dadd(128184.000000,160500.000000,163650.000000,260.582998)}
{pt3dadd(127464.000000,160728.000000,164175.000000,421.489526)}
{pt3dadd(126720.000000,160944.000000,164750.000000,496.464467)}
{pt3dadd(126276.000000,160548.000000,165275.000000,1000.000000)}

{create adhoc29}
{access adhoc29}
{connect adhoc29(1), adhoc27(0)}
{nseg = 1}
{strdef color color = "White"}
{pt3dclear()}
{pt3dadd(138240.000000,172596.000000,139275.000000,470.415500)}
{pt3dadd(137424.000000,172236.000000,139725.000000,250.367530)}
{pt3dadd(137148.000000,172104.000000,139825.000000,191.180446)}
{pt3dadd(136872.000000,171876.000000,139850.000000,116.144966)}
{pt3dadd(136536.000000,171780.000000,139975.000000,106.809462)}
{pt3dadd(136368.000000,171684.000000,140075.000000,100.007548)}
{pt3dadd(136008.000000,171612.000000,140225.000000,97.957548)}
{pt3dadd(135804.000000,171504.000000,140400.000000,103.047620)}
{pt3dadd(135252.000000,171552.000000,140450.000000,106.200000)}
{pt3dadd(134988.000000,171492.000000,140650.000000,109.352500)}
{pt3dadd(134808.000000,171624.000000,140850.000000,109.352500)}
{pt3dadd(134568.000000,171408.000000,141125.000000,119.201114)}
{pt3dadd(134316.000000,171024.000000,141275.000000,120.900388)}
{pt3dadd(133908.000000,170616.000000,141350.000000,124.700388)}
{pt3dadd(133644.000000,170580.000000,141275.000000,131.547888)}
{pt3dadd(133284.000000,170352.000000,141275.000000,131.547888)}
{pt3dadd(132984.000000,170244.000000,141275.000000,128.683512)}
{pt3dadd(132384.000000,169980.000000,141200.000000,119.438288)}
{pt3dadd(131856.000000,169728.000000,141175.000000,105.730480)}
{pt3dadd(131580.000000,169608.000000,141250.000000,82.270250)}

{create adhoc30}
{access adhoc30}
{connect adhoc30(1), adhoc26(0)}
{nseg = 1}
{strdef color color = "White"}
{pt3dclear()}
{pt3dadd(137796.000000,174972.000000,137950.000000,661.921800)}
{pt3dadd(138336.000000,176052.000000,138925.000000,614.158887)}
{pt3dadd(138012.000000,176796.000000,139500.000000,536.295004)}
{pt3dadd(137304.000000,177588.000000,140250.000000,536.295004)}
{pt3dadd(137304.000000,179196.000000,141025.000000,529.990990)}
{pt3dadd(137472.000000,180744.000000,141650.000000,558.648738)}
{pt3dadd(137328.000000,181368.000000,142500.000000,590.645984)}
{pt3dadd(137076.000000,182016.000000,143125.000000,637.005932)}
{pt3dadd(136740.000000,182040.000000,143750.000000,613.534524)}
{pt3dadd(136452.000000,182388.000000,144575.000000,591.180790)}
{pt3dadd(136128.000000,182976.000000,145300.000000,573.155024)}
{pt3dadd(135972.000000,183048.000000,145800.000000,555.987630)}
{pt3dadd(135756.000000,183108.000000,146425.000000,534.698366)}
{pt3dadd(135708.000000,182904.000000,147275.000000,529.512026)}
{pt3dadd(135228.000000,182652.000000,148025.000000,483.544274)}
{pt3dadd(135240.000000,182004.000000,148775.000000,458.788634)}
{pt3dadd(135768.000000,181476.000000,149650.000000,423.592254)}
{pt3dadd(136236.000000,181908.000000,150450.000000,379.813438)}
{pt3dadd(136512.000000,182364.000000,151100.000000,349.803398)}
{pt3dadd(136524.000000,182388.000000,151975.000000,373.317054)}
{pt3dadd(137124.000000,182652.000000,152675.000000,387.440712)}
{pt3dadd(137400.000000,182988.000000,153425.000000,399.060286)}
{pt3dadd(137604.000000,183540.000000,154125.000000,425.324362)}
{pt3dadd(137904.000000,183192.000000,154800.000000,455.334402)}
{pt3dadd(138228.000000,183324.000000,155625.000000,482.974838)}
{pt3dadd(138216.000000,182112.000000,156400.000000,468.851180)}
{pt3dadd(138108.000000,181440.000000,157075.000000,464.787550)}
{pt3dadd(137904.000000,181368.000000,157825.000000,497.873628)}
{pt3dadd(137748.000000,180696.000000,158500.000000,533.150604)}
{pt3dadd(137316.000000,180264.000000,159300.000000,544.314172)}
{pt3dadd(136956.000000,179844.000000,160125.000000,563.624170)}
{pt3dadd(137484.000000,179328.000000,161000.000000,596.710248)}
{pt3dadd(137904.000000,178668.000000,161950.000000,608.432000)}
{pt3dadd(138156.000000,177084.000000,162675.000000,608.432000)}
{pt3dadd(138204.000000,175968.000000,163100.000000,632.404213)}
{pt3dadd(137964.000000,175308.000000,162800.000000,695.017940)}

{create adhoc31}
{access adhoc31}
{connect adhoc31(1), adhoc30(0)}
{nseg = 1}
{strdef color color = "White"}
{pt3dclear()}
{pt3dadd(137964.000000,175308.000000,162800.000000,695.017940)}
{pt3dadd(137112.000000,174888.000000,163500.000000,355.778913)}
{pt3dadd(135708.000000,174216.000000,162750.000000,288.019750)}
{pt3dadd(135228.000000,174540.000000,162150.000000,188.109634)}
{pt3dadd(134448.000000,174516.000000,161500.000000,249.665010)}
{pt3dadd(132108.000000,175116.000000,161150.000000,259.951490)}
{pt3dadd(131352.000000,174972.000000,161325.000000,272.010920)}
{pt3dadd(130260.000000,174708.000000,161150.000000,273.965592)}
{pt3dadd(129336.000000,174156.000000,161075.000000,295.518920)}
{pt3dadd(128460.000000,173736.000000,160850.000000,235.825136)}
{pt3dadd(127620.000000,173232.000000,160675.000000,225.538656)}
{pt3dadd(126648.000000,172392.000000,160675.000000,219.068440)}
{pt3dadd(124380.000000,170580.000000,161200.000000,225.538656)}
{pt3dadd(123792.000000,169608.000000,161900.000000,210.147436)}
{pt3dadd(123492.000000,168468.000000,162600.000000,212.102108)}
{pt3dadd(123036.000000,167244.000000,163000.000000,207.032524)}
{pt3dadd(122100.000000,166020.000000,163975.000000,188.841522)}
{pt3dadd(121092.000000,164316.000000,164300.000000,160.112637)}
{pt3dadd(120036.000000,163080.000000,164175.000000,114.285710)}

{create adhoc32}
{access adhoc32}
{connect adhoc32(1), adhoc30(0)}
{nseg = 1}
{strdef color color = "White"}
{pt3dclear()}
{pt3dadd(137964.000000,175308.000000,162800.000000,695.017940)}
{pt3dadd(138228.000000,174432.000000,162750.000000,569.195760)}
{pt3dadd(138360.000000,173256.000000,162250.000000,516.456556)}
{pt3dadd(138516.000000,172284.000000,162275.000000,497.529488)}
{pt3dadd(138780.000000,171072.000000,162275.000000,508.161470)}
{pt3dadd(138828.000000,170088.000000,161900.000000,486.776614)}
{pt3dadd(139104.000000,169236.000000,161825.000000,495.523568)}
{pt3dadd(139668.000000,167832.000000,161350.000000,520.279208)}
{pt3dadd(139788.000000,166860.000000,161275.000000,485.538834)}
{pt3dadd(139800.000000,165876.000000,161025.000000,456.516386)}
{pt3dadd(139764.000000,164232.000000,160875.000000,475.051477)}
{pt3dadd(139932.000000,162900.000000,160850.000000,426.680730)}

{create adhoc33}
{access adhoc33}
{connect adhoc33(1), adhoc32(0)}
{nseg = 1}
{strdef color color = "White"}
{pt3dclear()}
{pt3dadd(139932.000000,162900.000000,160850.000000,426.680730)}
{pt3dadd(140088.000000,161592.000000,160425.000000,505.702253)}
{pt3dadd(139944.000000,160764.000000,160150.000000,440.490712)}
{pt3dadd(139308.000000,159864.000000,160250.000000,422.017670)}
{pt3dadd(139260.000000,159144.000000,160250.000000,377.865332)}
{pt3dadd(138912.000000,158280.000000,160325.000000,351.541120)}
{pt3dadd(138540.000000,157560.000000,160425.000000,362.607380)}
{pt3dadd(138096.000000,156840.000000,160500.000000,389.827376)}
{pt3dadd(137472.000000,155904.000000,160575.000000,404.236788)}
{pt3dadd(137064.000000,155172.000000,160450.000000,407.747104)}
{pt3dadd(136140.000000,154092.000000,160300.000000,404.061276)}
{pt3dadd(135540.000000,153228.000000,160200.000000,404.061276)}
{pt3dadd(134868.000000,152592.000000,160175.000000,383.694748)}
{pt3dadd(134136.000000,151488.000000,160200.000000,347.677812)}
{pt3dadd(133392.000000,151212.000000,160925.000000,340.824344)}
{pt3dadd(132648.000000,150432.000000,161050.000000,324.866632)}
{pt3dadd(131856.000000,150696.000000,161700.000000,317.310688)}
{pt3dadd(131184.000000,150780.000000,162250.000000,307.273260)}
{pt3dadd(130368.000000,150708.000000,162725.000000,335.734252)}
{pt3dadd(129348.000000,150768.000000,163550.000000,307.964620)}
{pt3dadd(128640.000000,150912.000000,163525.000000,305.214200)}
{pt3dadd(127092.000000,151704.000000,163050.000000,281.391902)}
{pt3dadd(126780.000000,153120.000000,163500.000000,239.993643)}
{pt3dadd(126900.000000,154284.000000,163850.000000,249.471370)}

{create adhoc34}
{access adhoc34}
{connect adhoc34(1), adhoc32(0)}
{nseg = 1}
{strdef color color = "White"}
{pt3dclear()}
{pt3dadd(139932.000000,162900.000000,160850.000000,426.680730)}
{pt3dadd(140460.000000,162228.000000,160675.000000,240.407077)}
{pt3dadd(140784.000000,161952.000000,160675.000000,196.244246)}
{pt3dadd(141000.000000,161580.000000,160675.000000,134.908100)}
{pt3dadd(141084.000000,161388.000000,160825.000000,126.000000)}
{pt3dadd(141252.000000,161220.000000,160900.000000,128.000000)}
{pt3dadd(141348.000000,161016.000000,161000.000000,131.000000)}
{pt3dadd(141516.000000,160908.000000,161050.000000,139.000000)}
{pt3dadd(141648.000000,160704.000000,161075.000000,148.000000)}
{pt3dadd(141900.000000,160632.000000,161225.000000,160.000000)}
{pt3dadd(141996.000000,160428.000000,161275.000000,171.000000)}
{pt3dadd(142164.000000,160212.000000,161350.000000,174.034174)}
{pt3dadd(142428.000000,159816.000000,161550.000000,168.642340)}
{pt3dadd(142668.000000,159720.000000,161625.000000,155.642340)}
{pt3dadd(142740.000000,159648.000000,161725.000000,143.642340)}
{pt3dadd(142812.000000,159396.000000,161875.000000,131.626578)}
{pt3dadd(143040.000000,159216.000000,161925.000000,124.592404)}
{pt3dadd(143316.000000,158856.000000,162025.000000,124.984238)}
{pt3dadd(143532.000000,158688.000000,162150.000000,125.984238)}
{pt3dadd(143616.000000,158580.000000,162400.000000,125.000000)}
{pt3dadd(143664.000000,158412.000000,162575.000000,105.000000)}

{create adhoc35}
{access adhoc35}
{connect adhoc35(1), adhoc19(0)}
{nseg = 1}
{strdef color color = "White"}
{pt3dclear()}
{pt3dadd(193656.000000,153540.000000,97575.000000,844.798650)}
{pt3dadd(192900.000000,152832.000000,96250.000000,494.874743)}
{pt3dadd(192492.000000,152460.000000,95975.000000,394.803526)}
{pt3dadd(192336.000000,152280.000000,95525.000000,263.075676)}
{pt3dadd(192444.000000,152100.000000,95275.000000,238.125000)}
{pt3dadd(192684.000000,152064.000000,94975.000000,223.466692)}
{pt3dadd(192936.000000,151680.000000,94650.000000,246.881612)}
{pt3dadd(193056.000000,151608.000000,94425.000000,246.881612)}
{pt3dadd(193056.000000,151512.000000,94200.000000,273.990253)}
{pt3dadd(193056.000000,151404.000000,93925.000000,303.234000)}

{create adhoc36}
{access adhoc36}
{connect adhoc36(1), adhoc35(0)}
{nseg = 1}
{strdef color color = "White"}
{pt3dclear()}
{pt3dadd(193056.000000,151404.000000,93925.000000,303.234000)}
{pt3dadd(193032.000000,151284.000000,93725.000000,275.915857)}
{pt3dadd(193104.000000,151116.000000,93650.000000,281.204754)}
{pt3dadd(193104.000000,151068.000000,93350.000000,281.204754)}
{pt3dadd(193212.000000,150972.000000,93050.000000,291.957280)}
{pt3dadd(193188.000000,150912.000000,92750.000000,297.595640)}
{pt3dadd(193104.000000,150780.000000,92500.000000,306.266344)}
{pt3dadd(193128.000000,150684.000000,92200.000000,306.266344)}
{pt3dadd(193152.000000,150660.000000,91875.000000,295.513818)}
{pt3dadd(192972.000000,150588.000000,91600.000000,287.256008)}
{pt3dadd(192840.000000,150540.000000,91350.000000,274.127568)}
{pt3dadd(192804.000000,150492.000000,91050.000000,262.837414)}
{pt3dadd(192804.000000,150300.000000,90800.000000,252.084888)}
{pt3dadd(192804.000000,150204.000000,90625.000000,252.084888)}
{pt3dadd(192852.000000,150036.000000,90400.000000,260.342698)}
{pt3dadd(192900.000000,149928.000000,90125.000000,267.392247)}
{pt3dadd(192996.000000,149820.000000,89875.000000,303.234000)}

{create adhoc37}
{access adhoc37}
{connect adhoc37(1), adhoc36(0)}
{nseg = 1}
{strdef color color = "White"}
{pt3dclear()}
{pt3dadd(192996.000000,149820.000000,89875.000000,303.234000)}
{pt3dadd(193092.000000,149736.000000,89825.000000,259.472533)}
{pt3dadd(193188.000000,149616.000000,89900.000000,216.945040)}
{pt3dadd(193296.000000,149508.000000,89900.000000,180.298240)}
{pt3dadd(193464.000000,149136.000000,89850.000000,156.779880)}
{pt3dadd(193500.000000,148908.000000,89775.000000,131.030228)}
{pt3dadd(193476.000000,148776.000000,89775.000000,121.131571)}
{pt3dadd(193500.000000,148644.000000,89775.000000,113.357953)}
{pt3dadd(193392.000000,148284.000000,89750.000000,111.126661)}
{pt3dadd(193344.000000,148008.000000,89675.000000,113.586661)}
{pt3dadd(193260.000000,147828.000000,89775.000000,118.277953)}
{pt3dadd(193200.000000,147588.000000,89775.000000,121.545850)}
{pt3dadd(193164.000000,147432.000000,89750.000000,123.888708)}
{pt3dadd(193188.000000,147204.000000,89650.000000,124.977142)}
{pt3dadd(193068.000000,146928.000000,89625.000000,121.374284)}
{pt3dadd(192960.000000,146700.000000,89575.000000,121.374284)}
{pt3dadd(192900.000000,146556.000000,89500.000000,125.157284)}
{pt3dadd(192840.000000,146484.000000,89475.000000,129.129434)}
{pt3dadd(192792.000000,146280.000000,89375.000000,135.444442)}
{pt3dadd(192732.000000,146088.000000,89375.000000,137.787300)}
{pt3dadd(192768.000000,145896.000000,89300.000000,139.110300)}
{pt3dadd(192876.000000,145620.000000,89175.000000,143.489596)}
{pt3dadd(192984.000000,145440.000000,89100.000000,143.489596)}
{pt3dadd(193032.000000,145308.000000,89050.000000,146.479742)}
{pt3dadd(193080.000000,145212.000000,89025.000000,160.373214)}
{pt3dadd(193152.000000,145092.000000,89025.000000,169.822094)}
{pt3dadd(193248.000000,144984.000000,89025.000000,176.753270)}
{pt3dadd(193308.000000,144900.000000,89000.000000,186.674592)}
{pt3dadd(193512.000000,144624.000000,88925.000000,199.767876)}
{pt3dadd(193740.000000,144252.000000,88875.000000,199.767876)}
{pt3dadd(193776.000000,143928.000000,88900.000000,197.994926)}
{pt3dadd(193728.000000,143796.000000,88850.000000,194.360384)}
{pt3dadd(193764.000000,143724.000000,88850.000000,185.897672)}
{pt3dadd(193740.000000,143580.000000,88800.000000,168.425092)}
{pt3dadd(193716.000000,143460.000000,88800.000000,158.503770)}
{pt3dadd(193728.000000,143220.000000,88775.000000,152.216990)}
{pt3dadd(193692.000000,143088.000000,88775.000000,140.758060)}
{pt3dadd(193620.000000,142896.000000,88600.000000,130.859403)}
{pt3dadd(193668.000000,142692.000000,88475.000000,123.808506)}
{pt3dadd(193716.000000,142596.000000,88425.000000,119.836356)}
{pt3dadd(193752.000000,142428.000000,88400.000000,111.396309)}
{pt3dadd(193752.000000,142236.000000,88350.000000,107.141169)}
{pt3dadd(193656.000000,142056.000000,88200.000000,105.213694)}
{pt3dadd(193560.000000,141888.000000,88075.000000,109.681591)}
{pt3dadd(193452.000000,141708.000000,88025.000000,108.481591)}
{pt3dadd(193428.000000,141552.000000,87975.000000,114.209488)}
{pt3dadd(193356.000000,141360.000000,87875.000000,120.924628)}
{pt3dadd(193356.000000,141180.000000,87800.000000,128.580000)}
{pt3dadd(193392.000000,141000.000000,87800.000000,132.300000)}
{pt3dadd(193440.000000,140904.000000,87800.000000,132.300000)}

{create adhoc38}
{access adhoc38}
{connect adhoc38(1), adhoc36(0)}
{nseg = 1}
{strdef color color = "White"}
{pt3dclear()}
{pt3dadd(192996.000000,149820.000000,89875.000000,303.234000)}
{pt3dadd(192984.000000,149724.000000,89475.000000,232.787983)}
{pt3dadd(193020.000000,149676.000000,89275.000000,217.952814)}
{pt3dadd(193020.000000,149496.000000,88875.000000,198.354158)}
{pt3dadd(193020.000000,149472.000000,88575.000000,194.146722)}
{pt3dadd(193032.000000,149388.000000,88275.000000,201.424456)}
{pt3dadd(192924.000000,149232.000000,88025.000000,201.424456)}
{pt3dadd(192912.000000,149256.000000,87725.000000,201.424456)}
{pt3dadd(192984.000000,149148.000000,87425.000000,207.894672)}
{pt3dadd(192960.000000,149052.000000,87250.000000,216.740802)}
{pt3dadd(192912.000000,148896.000000,86950.000000,225.586932)}
{pt3dadd(192996.000000,148812.000000,86675.000000,229.794368)}
{pt3dadd(193080.000000,148800.000000,86425.000000,240.080848)}
{pt3dadd(193044.000000,148680.000000,86175.000000,233.610632)}
{pt3dadd(193008.000000,148536.000000,85950.000000,228.971938)}
{pt3dadd(193044.000000,148476.000000,85825.000000,218.171136)}
{pt3dadd(193044.000000,148392.000000,85500.000000,225.304546)}
{pt3dadd(193008.000000,148296.000000,85250.000000,230.175176)}
{pt3dadd(192864.000000,148176.000000,85025.000000,246.885892)}
{pt3dadd(192864.000000,148128.000000,84800.000000,251.524586)}
{pt3dadd(192816.000000,147948.000000,84575.000000,276.110258)}
{pt3dadd(192696.000000,147852.000000,84375.000000,301.123668)}
{pt3dadd(192600.000000,147828.000000,84025.000000,303.743118)}
{pt3dadd(192636.000000,147684.000000,83675.000000,303.743118)}
{pt3dadd(192684.000000,147444.000000,83325.000000,316.949500)}
{pt3dadd(192672.000000,147396.000000,83050.000000,288.794300)}

{create adhoc39}
{access adhoc39}
{connect adhoc39(1), adhoc38(0)}
{nseg = 1}
{strdef color color = "White"}
{pt3dclear()}
{pt3dadd(192672.000000,147396.000000,83050.000000,288.794300)}
{pt3dadd(192624.000000,147552.000000,82700.000000,218.282167)}
{pt3dadd(192612.000000,147732.000000,82625.000000,182.629300)}
{pt3dadd(192504.000000,147972.000000,82475.000000,150.070440)}
{pt3dadd(192336.000000,148224.000000,82250.000000,130.791004)}
{pt3dadd(192240.000000,148368.000000,82075.000000,121.485850)}
{pt3dadd(192132.000000,148572.000000,81825.000000,117.017953)}
{pt3dadd(192012.000000,148668.000000,81600.000000,112.326661)}
{pt3dadd(191832.000000,148728.000000,81350.000000,108.929922)}
{pt3dadd(191772.000000,148752.000000,81300.000000,108.843540)}

{create adhoc40}
{access adhoc40}
{connect adhoc40(1), adhoc38(0)}
{nseg = 1}
{strdef color color = "White"}
{pt3dclear()}
{pt3dadd(192672.000000,147396.000000,83050.000000,288.794300)}
{pt3dadd(192636.000000,147168.000000,82750.000000,262.579013)}
{pt3dadd(192612.000000,147072.000000,82800.000000,252.697262)}
{pt3dadd(192564.000000,146988.000000,82700.000000,242.456762)}
{pt3dadd(192528.000000,146736.000000,82550.000000,237.780357)}
{pt3dadd(192504.000000,146508.000000,82400.000000,237.591800)}

{create adhoc41}
{access adhoc41}
{connect adhoc41(1), adhoc40(0)}
{nseg = 1}
{strdef color color = "White"}
{pt3dclear()}
{pt3dadd(192504.000000,146508.000000,82400.000000,237.591800)}
{pt3dadd(192360.000000,146328.000000,82275.000000,203.451270)}
{pt3dadd(192264.000000,146232.000000,82100.000000,202.403194)}
{pt3dadd(192144.000000,146184.000000,81925.000000,184.056984)}
{pt3dadd(192048.000000,146136.000000,81750.000000,180.760350)}
{pt3dadd(191988.000000,146016.000000,81625.000000,172.297638)}
{pt3dadd(191856.000000,145968.000000,81500.000000,161.359382)}
{pt3dadd(191700.000000,145764.000000,81300.000000,153.299652)}
{pt3dadd(191664.000000,145680.000000,81275.000000,154.758262)}
{pt3dadd(191616.000000,145620.000000,81275.000000,153.226726)}
{pt3dadd(191508.000000,145572.000000,81150.000000,151.768116)}
{pt3dadd(191388.000000,145500.000000,81050.000000,151.768116)}
{pt3dadd(191316.000000,145368.000000,80925.000000,158.054896)}
{pt3dadd(191220.000000,145260.000000,80775.000000,162.883066)}
{pt3dadd(191148.000000,145164.000000,80700.000000,167.711236)}
{pt3dadd(191064.000000,145068.000000,80625.000000,167.711236)}
{pt3dadd(190992.000000,144900.000000,80450.000000,162.008940)}
{pt3dadd(190932.000000,144732.000000,80275.000000,157.180770)}
{pt3dadd(190788.000000,144672.000000,80275.000000,157.180770)}
{pt3dadd(190692.000000,144600.000000,80100.000000,164.822392)}
{pt3dadd(190632.000000,144516.000000,79900.000000,171.109172)}
{pt3dadd(190488.000000,144348.000000,79650.000000,180.108102)}
{pt3dadd(190428.000000,144240.000000,79425.000000,188.570814)}
{pt3dadd(190332.000000,143988.000000,79250.000000,185.274180)}
{pt3dadd(190248.000000,143796.000000,79075.000000,174.335924)}
{pt3dadd(190128.000000,143736.000000,78925.000000,179.925138)}
{pt3dadd(189960.000000,143592.000000,78725.000000,185.514352)}
{pt3dadd(189780.000000,143448.000000,78600.000000,201.429320)}
{pt3dadd(189648.000000,143364.000000,78425.000000,224.275464)}
{pt3dadd(189444.000000,143220.000000,78125.000000,244.502158)}
{pt3dadd(189168.000000,143172.000000,77900.000000,270.676450)}
{pt3dadd(188808.000000,143184.000000,77675.000000,261.944950)}

{create adhoc42}
{access adhoc42}
{connect adhoc42(1), adhoc41(0)}
{nseg = 1}
{strdef color color = "White"}
{pt3dclear()}
{pt3dadd(188808.000000,143184.000000,77675.000000,261.944950)}
{pt3dadd(188652.000000,143076.000000,77625.000000,228.233793)}
{pt3dadd(188508.000000,142980.000000,77675.000000,196.885572)}
{pt3dadd(188364.000000,142884.000000,77675.000000,172.279582)}
{pt3dadd(188172.000000,142848.000000,77675.000000,146.350592)}
{pt3dadd(188040.000000,142836.000000,77650.000000,140.648296)}
{pt3dadd(187944.000000,142836.000000,77650.000000,136.269000)}
{pt3dadd(187812.000000,142788.000000,77450.000000,137.658150)}
{pt3dadd(187680.000000,142740.000000,77450.000000,137.658150)}
{pt3dadd(187620.000000,142632.000000,77375.000000,137.658150)}
{pt3dadd(187416.000000,142512.000000,77275.000000,138.981150)}
{pt3dadd(187332.000000,142464.000000,77275.000000,137.658150)}
{pt3dadd(187164.000000,142392.000000,77175.000000,133.686000)}
{pt3dadd(187068.000000,142284.000000,77025.000000,131.103000)}
{pt3dadd(186984.000000,142092.000000,76900.000000,127.500142)}
{pt3dadd(186924.000000,141972.000000,76775.000000,126.177142)}
{pt3dadd(186828.000000,141732.000000,76575.000000,123.717142)}
{pt3dadd(186780.000000,141624.000000,76525.000000,137.610614)}
{pt3dadd(186708.000000,141504.000000,76475.000000,151.504086)}
{pt3dadd(186624.000000,141276.000000,76400.000000,169.695088)}
{pt3dadd(186504.000000,141048.000000,76175.000000,190.753448)}
{pt3dadd(186408.000000,140844.000000,76100.000000,212.009028)}
{pt3dadd(186300.000000,140628.000000,76275.000000,200.698556)}
{pt3dadd(186264.000000,140496.000000,76250.000000,182.337187)}
{pt3dadd(186156.000000,140340.000000,76250.000000,161.033903)}
{pt3dadd(185988.000000,140052.000000,76250.000000,144.146303)}
{pt3dadd(185880.000000,139896.000000,76250.000000,129.521483)}
{pt3dadd(185772.000000,139752.000000,76250.000000,121.483343)}
{pt3dadd(185736.000000,139620.000000,76250.000000,122.519948)}
{pt3dadd(185664.000000,139500.000000,76250.000000,127.975088)}
{pt3dadd(185508.000000,139272.000000,76250.000000,122.544328)}
{pt3dadd(185412.000000,139152.000000,76250.000000,114.770710)}
{pt3dadd(185292.000000,138960.000000,76200.000000,116.794558)}
{pt3dadd(185148.000000,138840.000000,76325.000000,115.757953)}
{pt3dadd(185028.000000,138744.000000,76325.000000,111.290056)}
{pt3dadd(184944.000000,138624.000000,76350.000000,107.858764)}
{pt3dadd(184836.000000,138492.000000,76350.000000,105.733725)}
{pt3dadd(184728.000000,138360.000000,76350.000000,101.874186)}
{pt3dadd(184620.000000,138228.000000,76350.000000,100.683300)}
{pt3dadd(184500.000000,138072.000000,76325.000000,89.545845)}

{create adhoc43}
{access adhoc43}
{connect adhoc43(1), adhoc41(0)}
{nseg = 1}
{strdef color color = "White"}
{pt3dclear()}
{pt3dadd(188808.000000,143184.000000,77675.000000,261.944950)}
{pt3dadd(188760.000000,143376.000000,77475.000000,234.575203)}
{pt3dadd(188712.000000,143508.000000,77275.000000,202.079568)}
{pt3dadd(188604.000000,143676.000000,77100.000000,177.473578)}
{pt3dadd(188460.000000,143748.000000,76900.000000,156.217998)}
{pt3dadd(188328.000000,143892.000000,76675.000000,142.289596)}
{pt3dadd(188208.000000,143928.000000,76450.000000,133.849549)}
{pt3dadd(188196.000000,143976.000000,76150.000000,124.544395)}
{pt3dadd(188184.000000,143916.000000,75975.000000,121.268992)}
{pt3dadd(188184.000000,143892.000000,75875.000000,114.285710)}

{create adhoc44}
{access adhoc44}
{connect adhoc44(1), adhoc40(0)}
{nseg = 1}
{strdef color color = "White"}
{pt3dclear()}
{pt3dadd(192504.000000,146508.000000,82400.000000,237.591800)}
{pt3dadd(192420.000000,146220.000000,82550.000000,151.846008)}
{pt3dadd(192432.000000,145848.000000,82550.000000,131.584568)}
{pt3dadd(192408.000000,145488.000000,82600.000000,102.015110)}
{pt3dadd(192384.000000,145416.000000,82625.000000,103.660515)}

{create adhoc45}
{access adhoc45}
{connect adhoc45(1), adhoc35(0)}
{nseg = 1}
{strdef color color = "White"}
{pt3dclear()}
{pt3dadd(193056.000000,151404.000000,93925.000000,303.234000)}
{pt3dadd(193224.000000,151284.000000,94400.000000,164.432755)}
{pt3dadd(193356.000000,151188.000000,94325.000000,135.373450)}
{pt3dadd(193392.000000,150936.000000,94400.000000,94.471510)}
{pt3dadd(193440.000000,150840.000000,94425.000000,97.972225)}
{pt3dadd(193500.000000,150672.000000,94525.000000,97.972225)}
{pt3dadd(193704.000000,150444.000000,94675.000000,105.627597)}
{pt3dadd(193752.000000,150384.000000,94700.000000,111.718428)}
{pt3dadd(193848.000000,150276.000000,94775.000000,113.742276)}
{pt3dadd(193944.000000,150228.000000,94825.000000,113.742276)}
{pt3dadd(194064.000000,150204.000000,94925.000000,110.778196)}
{pt3dadd(194196.000000,150204.000000,94925.000000,103.122824)}
{pt3dadd(194316.000000,150216.000000,94925.000000,97.031993)}
{pt3dadd(194448.000000,150216.000000,94925.000000,94.067913)}
{pt3dadd(194616.000000,150216.000000,94900.000000,92.530708)}
{pt3dadd(194748.000000,150096.000000,94800.000000,94.023140)}
