# Supplementary material for: Full reconstruction of large lobula plate tangential cells in Drosophila from a 3D EM dataset
Source: PLoS One. 2018 Nov 28;13(11):e0207828. doi: 10.1371/journal.pone.0207828 (PMC6261601; doi:10.1371/journal.pone.0207828)
Supplement: S1 Dataset — (ZIP) [file pone.0207828.s001.zip › Diameter hoc/Zelle163_fertig.hoc0001.hoc]

/* created with convertKnossosNmlToHoc.m */

{create adhoc1}
{access adhoc1}
{nseg = 1}
{strdef color color = "White"}
{pt3dclear()}
{pt3dadd(70776.000000,189444.000000,166750.000000,1000.000000)}
{pt3dadd(70788.000000,189396.000000,166575.000000,599.872710)}
{pt3dadd(71064.000000,189516.000000,166350.000000,459.859544)}
{pt3dadd(71688.000000,189528.000000,166050.000000,308.890790)}
{pt3dadd(72156.000000,189744.000000,165775.000000,290.737280)}
{pt3dadd(72492.000000,189768.000000,165625.000000,274.271514)}
{pt3dadd(72864.000000,189900.000000,165450.000000,255.011852)}
{pt3dadd(73116.000000,189948.000000,165275.000000,261.370150)}
{pt3dadd(73560.000000,189924.000000,165100.000000,261.370150)}
{pt3dadd(74184.000000,189780.000000,164850.000000,240.136378)}
{pt3dadd(75120.000000,189672.000000,164575.000000,249.530476)}
{pt3dadd(75660.000000,189660.000000,164500.000000,237.859902)}
{pt3dadd(76224.000000,189444.000000,164450.000000,219.831030)}
{pt3dadd(76932.000000,189288.000000,164275.000000,205.645378)}
{pt3dadd(77424.000000,189204.000000,164050.000000,199.589856)}
{pt3dadd(77796.000000,188736.000000,164050.000000,157.900400)}
{pt3dadd(78528.000000,188424.000000,164050.000000,160.838824)}
{pt3dadd(79368.000000,188244.000000,164050.000000,188.931066)}
{pt3dadd(80124.000000,188088.000000,164050.000000,196.440508)}
{pt3dadd(80844.000000,187908.000000,163975.000000,214.783038)}
{pt3dadd(81456.000000,187740.000000,163750.000000,259.922092)}
{pt3dadd(82080.000000,187548.000000,163675.000000,287.913904)}
{pt3dadd(83052.000000,187332.000000,163475.000000,271.492236)}
{pt3dadd(83604.000000,187224.000000,163325.000000,260.743178)}
{pt3dadd(84444.000000,187152.000000,163275.000000,253.014628)}
{pt3dadd(85440.000000,187200.000000,163050.000000,225.045930)}
{pt3dadd(86304.000000,187212.000000,163050.000000,205.786268)}
{pt3dadd(87372.000000,187116.000000,163050.000000,214.479386)}
{pt3dadd(88128.000000,187056.000000,163050.000000,227.346196)}
{pt3dadd(88824.000000,186696.000000,163050.000000,244.021510)}
{pt3dadd(89460.000000,186324.000000,162950.000000,283.408792)}
{pt3dadd(89304.000000,186672.000000,162600.000000,322.937400)}
{pt3dadd(90288.000000,186204.000000,162600.000000,349.969710)}
{pt3dadd(91260.000000,186012.000000,162600.000000,393.549998)}
{pt3dadd(92136.000000,185856.000000,162600.000000,445.842986)}
{pt3dadd(92940.000000,185724.000000,162600.000000,416.039868)}
{pt3dadd(93804.000000,185724.000000,162550.000000,392.932928)}
{pt3dadd(94440.000000,185592.000000,162425.000000,370.926324)}
{pt3dadd(95160.000000,185388.000000,162400.000000,348.579808)}
{pt3dadd(95904.000000,184908.000000,162400.000000,290.178050)}
{pt3dadd(96768.000000,184776.000000,162400.000000,315.987834)}
{pt3dadd(97632.000000,184824.000000,162400.000000,339.094774)}
{pt3dadd(98508.000000,184704.000000,162400.000000,373.090898)}
{pt3dadd(99240.000000,184488.000000,162400.000000,376.376226)}
{pt3dadd(99876.000000,184308.000000,162275.000000,376.376226)}
{pt3dadd(100704.000000,184128.000000,162125.000000,336.847618)}
{pt3dadd(101364.000000,183948.000000,162000.000000,319.558562)}
{pt3dadd(102096.000000,183852.000000,161800.000000,307.569042)}
{pt3dadd(102744.000000,183720.000000,161575.000000,295.336950)}
{pt3dadd(103404.000000,183648.000000,161400.000000,315.605896)}
{pt3dadd(104028.000000,183600.000000,161200.000000,359.127838)}
{pt3dadd(104568.000000,183576.000000,160975.000000,389.005890)}
{pt3dadd(105312.000000,183492.000000,160675.000000,372.540124)}
{pt3dadd(106068.000000,183456.000000,160475.000000,391.843884)}
{pt3dadd(106488.000000,183240.000000,160300.000000,374.554828)}
{pt3dadd(107076.000000,183156.000000,160075.000000,337.391184)}
{pt3dadd(107640.000000,183084.000000,159875.000000,301.695248)}
{pt3dadd(108324.000000,183048.000000,159600.000000,291.128704)}
{pt3dadd(108948.000000,182832.000000,159300.000000,253.482414)}
{pt3dadd(109524.000000,182724.000000,159200.000000,237.601160)}
{pt3dadd(110364.000000,182388.000000,159000.000000,233.259770)}
{pt3dadd(111120.000000,182064.000000,158800.000000,227.982786)}
{pt3dadd(111720.000000,181740.000000,158525.000000,230.434352)}
{pt3dadd(112356.000000,181452.000000,158525.000000,254.594766)}
{pt3dadd(113112.000000,181248.000000,158350.000000,273.604900)}
{pt3dadd(113724.000000,181068.000000,158025.000000,296.956424)}
{pt3dadd(114048.000000,180732.000000,157525.000000,305.071402)}
{pt3dadd(114492.000000,180432.000000,157325.000000,310.348386)}
{pt3dadd(115092.000000,180144.000000,157000.000000,323.834262)}
{pt3dadd(115440.000000,180060.000000,156875.000000,302.600490)}
{pt3dadd(115800.000000,179964.000000,156725.000000,268.499908)}
{pt3dadd(115776.000000,179916.000000,156525.000000,243.747712)}
{pt3dadd(116364.000000,179796.000000,156525.000000,275.040992)}
{pt3dadd(116964.000000,179772.000000,156525.000000,322.876956)}
{pt3dadd(117528.000000,179952.000000,156525.000000,396.403716)}
{pt3dadd(118176.000000,180036.000000,156400.000000,444.664474)}
{pt3dadd(118872.000000,180192.000000,156400.000000,466.578676)}
{pt3dadd(119544.000000,180264.000000,156400.000000,422.998388)}
{pt3dadd(120156.000000,180264.000000,156400.000000,345.795294)}
{pt3dadd(120756.000000,180264.000000,156400.000000,248.169242)}
{pt3dadd(121224.000000,180204.000000,156400.000000,210.657542)}
{pt3dadd(121680.000000,180228.000000,156400.000000,190.485618)}
{pt3dadd(122040.000000,180372.000000,156400.000000,184.430096)}
{pt3dadd(122352.000000,180516.000000,156325.000000,180.088706)}
{pt3dadd(122580.000000,180708.000000,156325.000000,202.070246)}
{pt3dadd(122772.000000,180900.000000,156200.000000,213.772162)}
{pt3dadd(123036.000000,181116.000000,156025.000000,231.241242)}
{pt3dadd(123636.000000,181464.000000,155925.000000,261.815864)}
{pt3dadd(124188.000000,181824.000000,155850.000000,282.038508)}
{pt3dadd(124632.000000,182244.000000,155775.000000,280.021600)}
{pt3dadd(125316.000000,182520.000000,155625.000000,294.956536)}
{pt3dadd(125256.000000,182208.000000,155425.000000,292.382396)}
{pt3dadd(125784.000000,182616.000000,155425.000000,272.421754)}
{pt3dadd(126312.000000,183000.000000,155425.000000,272.421754)}
{pt3dadd(126780.000000,183300.000000,155425.000000,294.661306)}
{pt3dadd(126888.000000,183540.000000,155250.000000,285.267208)}
{pt3dadd(127344.000000,183876.000000,154950.000000,293.382186)}
{pt3dadd(127824.000000,184296.000000,154775.000000,301.110736)}
{pt3dadd(128148.000000,184416.000000,154600.000000,257.012417)}
{pt3dadd(128676.000000,184536.000000,154375.000000,257.012417)}
{pt3dadd(129000.000000,184668.000000,154075.000000,257.012417)}
{pt3dadd(129504.000000,184668.000000,153850.000000,259.992307)}
{pt3dadd(129960.000000,184668.000000,153625.000000,262.830301)}
{pt3dadd(130248.000000,184668.000000,153400.000000,298.407892)}
{pt3dadd(130308.000000,184608.000000,153175.000000,272.418084)}
{pt3dadd(130620.000000,184548.000000,152925.000000,257.293082)}
{pt3dadd(131064.000000,184704.000000,152750.000000,312.714950)}
{pt3dadd(131616.000000,184860.000000,152550.000000,389.716380)}
{pt3dadd(132120.000000,184692.000000,152300.000000,459.558948)}
{pt3dadd(132204.000000,184572.000000,152075.000000,506.831146)}
{pt3dadd(132708.000000,184932.000000,151850.000000,504.713394)}
{pt3dadd(133236.000000,184740.000000,151575.000000,425.131112)}
{pt3dadd(133524.000000,184656.000000,151425.000000,326.949158)}
{pt3dadd(133752.000000,184668.000000,151250.000000,257.106590)}
{pt3dadd(133980.000000,184404.000000,151250.000000,242.238408)}
{pt3dadd(134388.000000,184380.000000,151075.000000,272.324858)}
{pt3dadd(134772.000000,184464.000000,150900.000000,299.614152)}
{pt3dadd(135300.000000,184380.000000,150700.000000,333.638372)}
{pt3dadd(135696.000000,184392.000000,150525.000000,345.287980)}
{pt3dadd(135780.000000,184380.000000,150325.000000,364.349168)}
{pt3dadd(136188.000000,184464.000000,150150.000000,379.960758)}
{pt3dadd(136476.000000,184476.000000,149925.000000,411.332714)}
{pt3dadd(136704.000000,184476.000000,149625.000000,431.346960)}
{pt3dadd(136632.000000,184392.000000,149325.000000,438.081886)}
{pt3dadd(136632.000000,184452.000000,148850.000000,386.616682)}
{pt3dadd(136704.000000,184512.000000,148550.000000,331.749886)}
{pt3dadd(136788.000000,184536.000000,148225.000000,271.259242)}
{pt3dadd(136968.000000,184740.000000,148025.000000,217.220776)}
{pt3dadd(136908.000000,184620.000000,147825.000000,185.117418)}
{pt3dadd(136908.000000,184680.000000,147450.000000,202.586498)}
{pt3dadd(137040.000000,184440.000000,147175.000000,218.431464)}
{pt3dadd(136968.000000,184572.000000,146950.000000,224.198628)}
{pt3dadd(136944.000000,184608.000000,146750.000000,237.264174)}
{pt3dadd(136944.000000,184536.000000,146450.000000,245.957292)}
{pt3dadd(136884.000000,184620.000000,146125.000000,234.255376)}
{pt3dadd(137124.000000,184884.000000,145900.000000,227.579166)}
{pt3dadd(137184.000000,184968.000000,145650.000000,231.920556)}
{pt3dadd(137412.000000,185040.000000,145200.000000,220.775872)}
{pt3dadd(137616.000000,185064.000000,144875.000000,210.161892)}
{pt3dadd(137820.000000,185172.000000,144675.000000,206.224122)}
{pt3dadd(137916.000000,185400.000000,144375.000000,198.714680)}
{pt3dadd(138048.000000,185472.000000,144225.000000,192.356382)}
{pt3dadd(138324.000000,185568.000000,143975.000000,214.595934)}
{pt3dadd(138636.000000,185856.000000,143750.000000,252.242224)}
{pt3dadd(138684.000000,185928.000000,143525.000000,306.280690)}
{pt3dadd(138960.000000,186000.000000,143300.000000,363.890828)}
{pt3dadd(139128.000000,186132.000000,143050.000000,430.581760)}
{pt3dadd(139476.000000,186288.000000,142850.000000,486.003628)}
{pt3dadd(139560.000000,186420.000000,142600.000000,507.018588)}
{pt3dadd(139908.000000,186480.000000,142275.000000,498.422926)}
{pt3dadd(140352.000000,186516.000000,142075.000000,452.663620)}
{pt3dadd(140592.000000,186576.000000,141875.000000,382.222432)}
{pt3dadd(140928.000000,186636.000000,141575.000000,302.640150)}
{pt3dadd(141060.000000,186684.000000,141400.000000,245.899762)}
{pt3dadd(141276.000000,186684.000000,141250.000000,195.225972)}
{pt3dadd(141480.000000,186672.000000,141075.000000,181.715826)}
{pt3dadd(141756.000000,186732.000000,140800.000000,179.973548)}
{pt3dadd(141888.000000,186732.000000,140550.000000,173.162260)}
{pt3dadd(142128.000000,186720.000000,140325.000000,173.162260)}
{pt3dadd(142392.000000,186864.000000,140000.000000,184.448768)}
{pt3dadd(142596.000000,186936.000000,139825.000000,227.326044)}
{pt3dadd(142968.000000,186984.000000,139650.000000,272.347186)}
{pt3dadd(143424.000000,187140.000000,139400.000000,316.804764)}
{pt3dadd(143556.000000,187236.000000,139325.000000,345.458524)}
{pt3dadd(143616.000000,187488.000000,139200.000000,369.977624)}
{pt3dadd(143772.000000,187572.000000,139025.000000,359.620628)}
{pt3dadd(143988.000000,187668.000000,138850.000000,342.331572)}
{pt3dadd(144252.000000,187500.000000,138675.000000,325.865806)}
{pt3dadd(144492.000000,187620.000000,138475.000000,322.580478)}
{pt3dadd(144588.000000,187680.000000,138300.000000,310.348386)}
{pt3dadd(144540.000000,187764.000000,138100.000000,310.348386)}
{pt3dadd(144312.000000,187800.000000,137900.000000,316.762594)}
{pt3dadd(144612.000000,187800.000000,137700.000000,329.606290)}
{pt3dadd(144780.000000,187944.000000,137500.000000,329.606290)}
{pt3dadd(144948.000000,187920.000000,137325.000000,335.424174)}
{pt3dadd(145104.000000,187932.000000,137175.000000,338.709502)}
{pt3dadd(145500.000000,188004.000000,136800.000000,376.746674)}
{pt3dadd(146016.000000,188136.000000,136475.000000,348.777976)}
{pt3dadd(146184.000000,188160.000000,136225.000000,362.938152)}
{pt3dadd(147720.000000,188364.000000,135425.000000,369.352360)}
{pt3dadd(147792.000000,188316.000000,135250.000000,366.067032)}
{pt3dadd(148344.000000,188064.000000,135175.000000,318.635762)}
{pt3dadd(148620.000000,188244.000000,135025.000000,336.740654)}
{pt3dadd(148860.000000,188316.000000,134925.000000,329.315404)}
{pt3dadd(149064.000000,188280.000000,134700.000000,332.765002)}
{pt3dadd(149064.000000,188280.000000,134525.000000,339.499928)}
{pt3dadd(149472.000000,188352.000000,134350.000000,345.608698)}
{pt3dadd(149736.000000,188328.000000,134125.000000,348.737578)}
{pt3dadd(149892.000000,188328.000000,133900.000000,335.893882)}
{pt3dadd(150072.000000,188268.000000,133750.000000,320.212192)}
{pt3dadd(150336.000000,188280.000000,133600.000000,299.253518)}
{pt3dadd(150672.000000,188340.000000,133350.000000,280.243384)}
{pt3dadd(150972.000000,188496.000000,133175.000000,261.233250)}
{pt3dadd(151068.000000,188580.000000,132850.000000,241.973588)}
{pt3dadd(151392.000000,188616.000000,132700.000000,225.551920)}
{pt3dadd(151968.000000,188604.000000,132400.000000,212.486374)}
{pt3dadd(152292.000000,188640.000000,132100.000000,206.128076)}
{pt3dadd(152688.000000,188736.000000,131875.000000,197.848916)}
{pt3dadd(153096.000000,188892.000000,131725.000000,201.983576)}
{pt3dadd(153492.000000,188880.000000,131650.000000,204.000484)}
{pt3dadd(153960.000000,188952.000000,131500.000000,231.289778)}
{pt3dadd(154428.000000,188940.000000,131350.000000,250.549440)}
{pt3dadd(154812.000000,188964.000000,131100.000000,277.838734)}
{pt3dadd(155412.000000,188916.000000,130900.000000,309.429502)}
{pt3dadd(156396.000000,189084.000000,130600.000000,364.152982)}
{pt3dadd(156996.000000,189036.000000,130350.000000,378.313158)}
{pt3dadd(157596.000000,189048.000000,130150.000000,398.582104)}
{pt3dadd(158004.000000,189180.000000,129950.000000,386.932496)}
{pt3dadd(158556.000000,189144.000000,129825.000000,383.310426)}
{pt3dadd(159396.000000,189288.000000,129575.000000,378.687642)}
{pt3dadd(159996.000000,189252.000000,129250.000000,400.753346)}
{pt3dadd(160596.000000,189252.000000,128975.000000,393.328096)}
{pt3dadd(161172.000000,188988.000000,128700.000000,415.334700)}
{pt3dadd(161364.000000,188988.000000,128525.000000,396.950166)}
{pt3dadd(161844.000000,188796.000000,128375.000000,376.935920)}
{pt3dadd(162552.000000,188868.000000,128375.000000,367.459212)}
{pt3dadd(163332.000000,188808.000000,128250.000000,392.096242)}
{pt3dadd(163668.000000,188904.000000,128175.000000,434.032234)}
{pt3dadd(164280.000000,188844.000000,128050.000000,510.069782)}
{pt3dadd(164604.000000,188676.000000,127900.000000,544.657356)}
{pt3dadd(165000.000000,188424.000000,127750.000000,544.657356)}
{pt3dadd(165468.000000,188496.000000,127700.000000,544.657356)}
{pt3dadd(165984.000000,188628.000000,127400.000000,502.721364)}
{pt3dadd(166440.000000,188580.000000,127175.000000,460.679940)}
{pt3dadd(167028.000000,188664.000000,126950.000000,437.510950)}
{pt3dadd(167400.000000,188304.000000,126600.000000,417.496704)}
{pt3dadd(167796.000000,188184.000000,126375.000000,371.901000)}
{pt3dadd(167952.000000,188124.000000,126125.000000,375.704180)}
{pt3dadd(168420.000000,187920.000000,125775.000000,363.714660)}
{pt3dadd(168792.000000,187788.000000,125425.000000,392.235110)}
{pt3dadd(169248.000000,187284.000000,125125.000000,412.249356)}
{pt3dadd(169908.000000,187272.000000,124725.000000,448.819620)}
{pt3dadd(170424.000000,187212.000000,124350.000000,452.812954)}
{pt3dadd(170964.000000,187440.000000,124350.000000,456.616134)}
{pt3dadd(171324.000000,187572.000000,124175.000000,432.288690)}
{pt3dadd(172032.000000,187860.000000,123675.000000,415.896514)}
{pt3dadd(172500.000000,187860.000000,123475.000000,407.710174)}
{pt3dadd(173124.000000,187824.000000,123325.000000,416.305836)}
{pt3dadd(173580.000000,187932.000000,123075.000000,420.299170)}
{pt3dadd(174216.000000,187896.000000,122675.000000,404.687580)}
{pt3dadd(174612.000000,187968.000000,122425.000000,394.330584)}
{pt3dadd(174852.000000,187980.000000,122225.000000,377.041528)}
{pt3dadd(175212.000000,188052.000000,122000.000000,316.191774)}
{pt3dadd(175548.000000,188184.000000,121725.000000,267.177298)}
{pt3dadd(175704.000000,188028.000000,121350.000000,243.767058)}
{pt3dadd(175980.000000,188112.000000,121350.000000,224.756924)}
{pt3dadd(176160.000000,188376.000000,121350.000000,206.652032)}
{pt3dadd(176124.000000,188592.000000,121350.000000,221.742480)}
{pt3dadd(176256.000000,188820.000000,121350.000000,243.656682)}
{pt3dadd(176580.000000,189048.000000,121350.000000,278.485506)}
{pt3dadd(176904.000000,189180.000000,121200.000000,276.261868)}
{pt3dadd(177612.000000,189180.000000,120950.000000,288.548876)}
{pt3dadd(178224.000000,189024.000000,120750.000000,310.844338)}
{pt3dadd(178440.000000,189228.000000,120425.000000,330.148098)}
{pt3dadd(179052.000000,189276.000000,120025.000000,322.351584)}
{pt3dadd(179220.000000,189348.000000,119825.000000,329.361608)}
{pt3dadd(179736.000000,189468.000000,119600.000000,332.199602)}
{pt3dadd(180012.000000,189624.000000,119400.000000,343.074450)}
{pt3dadd(180180.000000,189924.000000,119250.000000,318.493706)}
{pt3dadd(180552.000000,190104.000000,119050.000000,318.493706)}
{pt3dadd(180924.000000,190116.000000,119050.000000,350.870964)}
{pt3dadd(181320.000000,189996.000000,119050.000000,363.714660)}
{pt3dadd(181416.000000,190008.000000,118800.000000,352.839812)}
{pt3dadd(181632.000000,189888.000000,118625.000000,367.063560)}
{pt3dadd(182004.000000,189780.000000,118400.000000,350.597794)}
{pt3dadd(182664.000000,189588.000000,117900.000000,326.335514)}
{pt3dadd(183432.000000,189216.000000,117100.000000,305.376840)}
{pt3dadd(183780.000000,189180.000000,116725.000000,302.091512)}
{pt3dadd(184224.000000,189168.000000,116350.000000,320.245022)}
{pt3dadd(184632.000000,189072.000000,115975.000000,373.027752)}
{pt3dadd(185124.000000,189132.000000,115625.000000,405.885694)}
{pt3dadd(185820.000000,189252.000000,115250.000000,442.455958)}
{pt3dadd(186204.000000,189348.000000,114875.000000,452.812954)}
{pt3dadd(186432.000000,189480.000000,114625.000000,425.712680)}
{pt3dadd(187044.000000,189576.000000,114100.000000,385.773646)}
{pt3dadd(187368.000000,189516.000000,113725.000000,352.915704)}
{pt3dadd(187596.000000,189468.000000,113375.000000,337.304114)}
{pt3dadd(187740.000000,189468.000000,112900.000000,349.293634)}
{pt3dadd(188052.000000,189468.000000,112325.000000,372.400574)}
{pt3dadd(188304.000000,189588.000000,111875.000000,376.022644)}
{pt3dadd(188364.000000,189384.000000,111075.000000,396.291590)}
{pt3dadd(188568.000000,189192.000000,110500.000000,417.933204)}
{pt3dadd(188664.000000,189060.000000,110000.000000,419.483082)}
{pt3dadd(188796.000000,188424.000000,109800.000000,439.254650)}
{pt3dadd(188964.000000,188304.000000,109550.000000,448.014770)}

{create adhoc2}
{access adhoc2}
{connect adhoc2(1), adhoc1(0)}
{nseg = 1}
{strdef color color = "White"}
{pt3dclear()}
{pt3dadd(188964.000000,188304.000000,109550.000000,448.014770)}
{pt3dadd(189108.000000,188040.000000,109275.000000,372.215270)}
{pt3dadd(189204.000000,187836.000000,109050.000000,323.117710)}
{pt3dadd(189348.000000,187608.000000,108875.000000,278.770336)}
{pt3dadd(189408.000000,187380.000000,108825.000000,249.139112)}
{pt3dadd(189408.000000,187200.000000,108750.000000,225.376560)}
{pt3dadd(189480.000000,187128.000000,108550.000000,214.575758)}
{pt3dadd(189468.000000,186912.000000,108425.000000,198.451894)}
{pt3dadd(189504.000000,186756.000000,108250.000000,205.585304)}
{pt3dadd(189552.000000,186564.000000,108100.000000,218.247698)}
{pt3dadd(189648.000000,186408.000000,107925.000000,222.665506)}
{pt3dadd(189744.000000,186300.000000,107700.000000,233.466308)}
{pt3dadd(189744.000000,186168.000000,107525.000000,244.951478)}
{pt3dadd(189732.000000,186072.000000,107325.000000,226.332898)}
{pt3dadd(189744.000000,185976.000000,107100.000000,226.332898)}
{pt3dadd(189804.000000,185904.000000,106900.000000,209.445298)}
{pt3dadd(189900.000000,185760.000000,106650.000000,195.009954)}
{pt3dadd(190056.000000,185664.000000,106450.000000,177.537374)}
{pt3dadd(190068.000000,185544.000000,106225.000000,184.815108)}
{pt3dadd(190188.000000,185472.000000,106075.000000,172.152714)}
{pt3dadd(190248.000000,185376.000000,105925.000000,178.753834)}
{pt3dadd(190368.000000,185244.000000,105725.000000,172.467054)}
{pt3dadd(190464.000000,185136.000000,105625.000000,172.467054)}
{pt3dadd(190536.000000,185028.000000,105500.000000,162.049670)}
{pt3dadd(190656.000000,184956.000000,105325.000000,150.017790)}
{pt3dadd(190752.000000,184896.000000,105150.000000,132.530770)}
{pt3dadd(190812.000000,184860.000000,104900.000000,127.358620)}
{pt3dadd(191004.000000,184800.000000,104775.000000,131.737916)}
{pt3dadd(191208.000000,184788.000000,104675.000000,134.877566)}
{pt3dadd(191436.000000,184680.000000,104675.000000,148.771038)}
{pt3dadd(191664.000000,184572.000000,104675.000000,164.485108)}
{pt3dadd(191880.000000,184464.000000,104675.000000,175.944038)}
{pt3dadd(192120.000000,184440.000000,104650.000000,177.552152)}
{pt3dadd(192324.000000,184428.000000,104525.000000,182.875214)}
{pt3dadd(192504.000000,184332.000000,104400.000000,182.875214)}
{pt3dadd(192648.000000,184164.000000,104275.000000,188.464428)}
{pt3dadd(192744.000000,183924.000000,104150.000000,196.106050)}
{pt3dadd(192864.000000,183768.000000,103925.000000,203.383784)}
{pt3dadd(193032.000000,183564.000000,103825.000000,214.184586)}
{pt3dadd(193200.000000,183432.000000,103600.000000,252.493514)}
{pt3dadd(193332.000000,183264.000000,103450.000000,288.847770)}
{pt3dadd(193512.000000,183036.000000,103300.000000,309.426362)}
{pt3dadd(193632.000000,182820.000000,103175.000000,338.584474)}
{pt3dadd(193668.000000,182592.000000,103100.000000,352.369344)}
{pt3dadd(193668.000000,182352.000000,103025.000000,345.173200)}
{pt3dadd(193668.000000,182124.000000,103000.000000,361.853900)}
{pt3dadd(193668.000000,181908.000000,103050.000000,396.962012)}
{pt3dadd(193716.000000,181680.000000,102775.000000,393.618860)}
{pt3dadd(193620.000000,181464.000000,102750.000000,373.040268)}
{pt3dadd(193524.000000,181236.000000,102525.000000,333.464772)}
{pt3dadd(193452.000000,180996.000000,102500.000000,291.770662)}
{pt3dadd(193308.000000,180768.000000,102575.000000,259.846510)}
{pt3dadd(193212.000000,180564.000000,102725.000000,270.385806)}
{pt3dadd(193080.000000,180432.000000,103125.000000,321.368354)}
{pt3dadd(192984.000000,180108.000000,103150.000000,394.464206)}
{pt3dadd(193200.000000,180132.000000,103250.000000,408.938320)}
{pt3dadd(193440.000000,180108.000000,103400.000000,399.834076)}
{pt3dadd(193548.000000,180000.000000,103650.000000,345.288818)}
{pt3dadd(193764.000000,179916.000000,103700.000000,271.937821)}
{pt3dadd(193920.000000,179784.000000,103825.000000,201.981619)}
{pt3dadd(194088.000000,179688.000000,103850.000000,168.888925)}
{pt3dadd(194184.000000,179604.000000,103850.000000,138.913065)}
{pt3dadd(194316.000000,179448.000000,103850.000000,151.514853)}
{pt3dadd(194508.000000,179388.000000,103775.000000,197.645854)}
{pt3dadd(194880.000000,179232.000000,103575.000000,224.522244)}
{pt3dadd(195132.000000,179208.000000,103625.000000,233.852386)}
{pt3dadd(195348.000000,179100.000000,103500.000000,243.301266)}
{pt3dadd(195576.000000,178932.000000,103500.000000,241.612746)}
{pt3dadd(195744.000000,178848.000000,103500.000000,205.380402)}
{pt3dadd(195900.000000,178740.000000,103475.000000,173.905752)}
{pt3dadd(195960.000000,178584.000000,103400.000000,164.575610)}
{pt3dadd(196056.000000,178428.000000,103400.000000,164.575610)}
{pt3dadd(196056.000000,178212.000000,103325.000000,171.853344)}
{pt3dadd(196020.000000,177996.000000,103300.000000,176.681514)}
{pt3dadd(196020.000000,177768.000000,103275.000000,176.681514)}
{pt3dadd(196092.000000,177540.000000,103125.000000,175.073400)}
{pt3dadd(196140.000000,177288.000000,103050.000000,170.003816)}
{pt3dadd(196236.000000,177072.000000,102950.000000,162.726082)}
{pt3dadd(196284.000000,176844.000000,102825.000000,161.037562)}
{pt3dadd(196308.000000,176616.000000,102825.000000,167.324342)}
{pt3dadd(196392.000000,176352.000000,102675.000000,180.417626)}
{pt3dadd(196488.000000,176112.000000,102525.000000,189.303474)}
{pt3dadd(196536.000000,175872.000000,102550.000000,194.626536)}
{pt3dadd(196620.000000,175632.000000,102500.000000,218.614986)}
{pt3dadd(196788.000000,175428.000000,102475.000000,240.914916)}
{pt3dadd(196932.000000,175200.000000,102400.000000,245.553610)}
{pt3dadd(196932.000000,175020.000000,102375.000000,265.152266)}
{pt3dadd(197004.000000,174840.000000,102275.000000,265.152266)}
{pt3dadd(197016.000000,174624.000000,102275.000000,254.911766)}
{pt3dadd(197040.000000,174372.000000,102275.000000,257.799706)}
{pt3dadd(197076.000000,174108.000000,102250.000000,248.953576)}
{pt3dadd(197052.000000,173856.000000,102250.000000,251.985920)}
{pt3dadd(197064.000000,173604.000000,102125.000000,255.993000)}
{pt3dadd(197124.000000,173352.000000,102075.000000,243.933570)}
{pt3dadd(197184.000000,173112.000000,102050.000000,233.181044)}
{pt3dadd(197304.000000,172884.000000,102025.000000,235.233452)}
{pt3dadd(197316.000000,172656.000000,102075.000000,207.013238)}
{pt3dadd(197376.000000,172380.000000,101950.000000,249.248832)}
{pt3dadd(197376.000000,172164.000000,101950.000000,291.192302)}
{pt3dadd(197292.000000,171948.000000,102075.000000,315.014600)}
{pt3dadd(197364.000000,171720.000000,102050.000000,349.316448)}
{pt3dadd(197460.000000,171492.000000,102075.000000,384.063774)}
{pt3dadd(197544.000000,171252.000000,102050.000000,362.406772)}
{pt3dadd(197568.000000,171012.000000,102075.000000,351.867476)}
{pt3dadd(197568.000000,170772.000000,102050.000000,335.909764)}
{pt3dadd(197592.000000,170532.000000,102050.000000,316.266224)}
{pt3dadd(197628.000000,170292.000000,102025.000000,303.818828)}
{pt3dadd(197640.000000,170052.000000,102050.000000,285.395264)}
{pt3dadd(197652.000000,169824.000000,102050.000000,279.178960)}
{pt3dadd(197796.000000,169644.000000,101925.000000,273.809090)}
{pt3dadd(197796.000000,169404.000000,101900.000000,268.439220)}
{pt3dadd(197892.000000,169164.000000,101950.000000,277.543464)}
{pt3dadd(198108.000000,168924.000000,102025.000000,295.967028)}
{pt3dadd(198336.000000,168696.000000,102000.000000,290.328668)}
{pt3dadd(198516.000000,168444.000000,101875.000000,283.195258)}
{pt3dadd(198708.000000,168000.000000,101775.000000,275.279056)}
{pt3dadd(198684.000000,167736.000000,101850.000000,259.898764)}
{pt3dadd(198660.000000,167508.000000,101825.000000,252.979416)}
{pt3dadd(198672.000000,167244.000000,101875.000000,244.667402)}
{pt3dadd(198696.000000,167004.000000,102000.000000,249.306096)}
{pt3dadd(198648.000000,166776.000000,101975.000000,242.065188)}
{pt3dadd(198708.000000,166548.000000,101925.000000,224.352786)}
{pt3dadd(198756.000000,166320.000000,101850.000000,234.456094)}
{pt3dadd(198816.000000,166092.000000,101900.000000,251.438812)}
{pt3dadd(198864.000000,165684.000000,102025.000000,268.407642)}
{pt3dadd(198972.000000,165288.000000,102025.000000,288.934622)}
{pt3dadd(199176.000000,165132.000000,101975.000000,313.835180)}
{pt3dadd(199392.000000,164928.000000,101925.000000,288.794300)}

{create adhoc3}
{access adhoc3}
{connect adhoc3(1), adhoc2(0)}
{nseg = 1}
{strdef color color = "White"}
{pt3dclear()}
{pt3dadd(199392.000000,164928.000000,101925.000000,288.794300)}
{pt3dadd(199596.000000,164796.000000,101875.000000,319.407100)}
{pt3dadd(199812.000000,164700.000000,101875.000000,347.186662)}
{pt3dadd(200028.000000,164652.000000,101850.000000,353.106946)}
{pt3dadd(200244.000000,164628.000000,101825.000000,344.436242)}
{pt3dadd(200448.000000,164556.000000,101800.000000,319.485566)}
{pt3dadd(200676.000000,164328.000000,101800.000000,269.608350)}
{pt3dadd(200844.000000,164172.000000,101750.000000,234.861024)}
{pt3dadd(200916.000000,163956.000000,101675.000000,203.344176)}
{pt3dadd(200964.000000,163728.000000,101600.000000,191.436288)}
{pt3dadd(201012.000000,163488.000000,101475.000000,187.228852)}
{pt3dadd(201060.000000,163308.000000,101300.000000,187.228852)}
{pt3dadd(201156.000000,163140.000000,101150.000000,185.540332)}
{pt3dadd(201240.000000,162912.000000,101075.000000,184.008796)}
{pt3dadd(201324.000000,162732.000000,100925.000000,184.008796)}
{pt3dadd(201444.000000,162528.000000,100775.000000,182.054124)}
{pt3dadd(201648.000000,162408.000000,100575.000000,185.688666)}
{pt3dadd(201756.000000,162252.000000,100325.000000,184.080552)}
{pt3dadd(201852.000000,162036.000000,100250.000000,192.543264)}
{pt3dadd(201876.000000,161808.000000,100250.000000,204.451152)}
{pt3dadd(201900.000000,161580.000000,100250.000000,232.220784)}
{pt3dadd(201864.000000,161328.000000,100150.000000,250.886172)}
{pt3dadd(201864.000000,161088.000000,100075.000000,273.732316)}
{pt3dadd(201864.000000,160872.000000,99900.000000,282.157204)}
{pt3dadd(201864.000000,160680.000000,99750.000000,272.404344)}
{pt3dadd(201948.000000,160440.000000,99625.000000,241.000170)}
{pt3dadd(201996.000000,160212.000000,99500.000000,217.011720)}
{pt3dadd(202068.000000,159984.000000,99400.000000,203.051424)}
{pt3dadd(202092.000000,159756.000000,99350.000000,194.626536)}
{pt3dadd(202128.000000,159528.000000,99250.000000,188.464428)}
{pt3dadd(202224.000000,159300.000000,99125.000000,194.053642)}
{pt3dadd(202332.000000,159144.000000,99025.000000,199.376704)}
{pt3dadd(202428.000000,158988.000000,98875.000000,192.098970)}
{pt3dadd(202572.000000,158868.000000,98775.000000,190.237378)}
{pt3dadd(202644.000000,158676.000000,98700.000000,177.603906)}
{pt3dadd(202692.000000,158436.000000,98800.000000,175.649234)}
{pt3dadd(202728.000000,158316.000000,99000.000000,175.649234)}
{pt3dadd(202800.000000,158100.000000,98575.000000,191.773098)}
{pt3dadd(202824.000000,157908.000000,98475.000000,212.300078)}
{pt3dadd(202860.000000,157656.000000,98400.000000,252.703182)}
{pt3dadd(202884.000000,157392.000000,98400.000000,271.368570)}
{pt3dadd(202872.000000,157140.000000,98350.000000,302.481354)}
{pt3dadd(202848.000000,156924.000000,98175.000000,307.595520)}
{pt3dadd(202908.000000,156708.000000,98000.000000,304.955927)}
{pt3dadd(202824.000000,156492.000000,97975.000000,275.042200)}

{create adhoc4}
{access adhoc4}
{connect adhoc4(1), adhoc3(0)}
{nseg = 1}
{strdef color color = "White"}
{pt3dclear()}
{pt3dadd(202824.000000,156492.000000,97975.000000,275.042200)}
{pt3dadd(202992.000000,156768.000000,97725.000000,239.993643)}
{pt3dadd(203064.000000,156708.000000,97450.000000,200.158482)}
{pt3dadd(203124.000000,156624.000000,97200.000000,171.610042)}
{pt3dadd(203088.000000,156528.000000,96950.000000,157.716570)}
{pt3dadd(203112.000000,156528.000000,96750.000000,135.605296)}
{pt3dadd(203160.000000,156456.000000,96500.000000,138.065296)}
{pt3dadd(203208.000000,156372.000000,96225.000000,131.103000)}
{pt3dadd(203232.000000,156396.000000,96000.000000,152.161360)}
{pt3dadd(203208.000000,156420.000000,95700.000000,176.855634)}
{pt3dadd(203184.000000,156348.000000,95450.000000,212.751778)}
{pt3dadd(203184.000000,156264.000000,95175.000000,246.938578)}
{pt3dadd(203076.000000,156144.000000,94925.000000,279.497438)}
{pt3dadd(203040.000000,156024.000000,94675.000000,321.582032)}
{pt3dadd(202980.000000,155928.000000,94425.000000,370.475014)}
{pt3dadd(202764.000000,155652.000000,94075.000000,380.512442)}
{pt3dadd(202560.000000,155376.000000,93800.000000,401.138158)}
{pt3dadd(202332.000000,155208.000000,93600.000000,422.960573)}
{pt3dadd(202116.000000,155184.000000,93475.000000,406.362580)}

{create adhoc5}
{access adhoc5}
{connect adhoc5(1), adhoc4(0)}
{nseg = 1}
{strdef color color = "White"}
{pt3dclear()}
{pt3dadd(202116.000000,155184.000000,93475.000000,406.362580)}
{pt3dadd(202320.000000,155280.000000,93225.000000,294.603430)}
{pt3dadd(202416.000000,155520.000000,93025.000000,240.003988)}
{pt3dadd(202428.000000,155736.000000,92875.000000,194.190402)}
{pt3dadd(202308.000000,155808.000000,92750.000000,175.571822)}
{pt3dadd(202164.000000,155808.000000,92525.000000,182.365544)}
{pt3dadd(202200.000000,155748.000000,92275.000000,190.007166)}
{pt3dadd(202308.000000,155748.000000,92050.000000,212.118440)}
{pt3dadd(202320.000000,155688.000000,91800.000000,231.667950)}
{pt3dadd(202248.000000,155580.000000,91525.000000,246.672110)}
{pt3dadd(202116.000000,155472.000000,91275.000000,275.042200)}

{create adhoc6}
{access adhoc6}
{connect adhoc6(1), adhoc5(0)}
{nseg = 1}
{strdef color color = "White"}
{pt3dclear()}
{pt3dadd(202116.000000,155472.000000,91275.000000,275.042200)}
{pt3dadd(201996.000000,155772.000000,91075.000000,270.744293)}
{pt3dadd(201456.000000,155688.000000,91075.000000,235.137386)}
{pt3dadd(201336.000000,155640.000000,91025.000000,183.204483)}
{pt3dadd(201096.000000,155604.000000,91025.000000,186.159400)}

{create adhoc7}
{access adhoc7}
{connect adhoc7(1), adhoc5(0)}
{nseg = 1}
{strdef color color = "White"}
{pt3dclear()}
{pt3dadd(202116.000000,155472.000000,91275.000000,275.042200)}
{pt3dadd(202116.000000,155064.000000,91225.000000,232.262487)}
{pt3dadd(202128.000000,154848.000000,91250.000000,206.233964)}
{pt3dadd(202128.000000,154620.000000,91200.000000,186.684454)}
{pt3dadd(202116.000000,154392.000000,91125.000000,178.660754)}
{pt3dadd(202116.000000,154164.000000,91025.000000,173.337692)}
{pt3dadd(202104.000000,153960.000000,91000.000000,158.244220)}
{pt3dadd(202104.000000,153732.000000,90950.000000,164.231630)}
{pt3dadd(202008.000000,153528.000000,90875.000000,159.403460)}
{pt3dadd(201984.000000,153324.000000,90800.000000,161.265052)}
{pt3dadd(201936.000000,153120.000000,90725.000000,175.013002)}
{pt3dadd(201876.000000,152904.000000,90725.000000,208.771862)}
{pt3dadd(201864.000000,152676.000000,90675.000000,238.680596)}
{pt3dadd(201912.000000,152460.000000,90625.000000,263.058276)}
{pt3dadd(201864.000000,152244.000000,90550.000000,265.012948)}
{pt3dadd(201828.000000,151980.000000,90525.000000,256.588060)}
{pt3dadd(201804.000000,151716.000000,90450.000000,232.599610)}
{pt3dadd(201732.000000,151500.000000,90375.000000,198.092616)}
{pt3dadd(201636.000000,151284.000000,90325.000000,165.941318)}
{pt3dadd(201588.000000,151080.000000,90225.000000,141.949526)}
{pt3dadd(201456.000000,150864.000000,90150.000000,122.600914)}
{pt3dadd(201444.000000,150660.000000,90000.000000,108.575364)}
{pt3dadd(201384.000000,150432.000000,89875.000000,97.312383)}
{pt3dadd(201336.000000,150252.000000,89725.000000,93.259869)}
{pt3dadd(201276.000000,150084.000000,89625.000000,96.935620)}
{pt3dadd(201264.000000,149856.000000,89550.000000,102.390760)}
{pt3dadd(201264.000000,149664.000000,89450.000000,107.845900)}
{pt3dadd(201228.000000,149436.000000,89375.000000,127.168611)}
{pt3dadd(201192.000000,149208.000000,89325.000000,147.457455)}
{pt3dadd(201108.000000,148968.000000,89225.000000,181.733792)}
{pt3dadd(201096.000000,148740.000000,89125.000000,195.627264)}
{pt3dadd(201132.000000,148512.000000,89100.000000,220.321538)}
{pt3dadd(201108.000000,148548.000000,88825.000000,240.848518)}
{pt3dadd(201144.000000,148476.000000,88575.000000,265.434190)}
{pt3dadd(201180.000000,148320.000000,88350.000000,274.104894)}
{pt3dadd(201216.000000,148056.000000,88200.000000,290.019862)}
{pt3dadd(201156.000000,147828.000000,88050.000000,281.173732)}
{pt3dadd(201084.000000,147612.000000,88075.000000,260.646752)}
{pt3dadd(200976.000000,147396.000000,88075.000000,234.199488)}
{pt3dadd(200940.000000,147156.000000,88025.000000,194.520344)}
{pt3dadd(200952.000000,146916.000000,87950.000000,170.142664)}
{pt3dadd(200832.000000,146712.000000,87900.000000,158.266670)}
{pt3dadd(200808.000000,146532.000000,87750.000000,143.891932)}
{pt3dadd(200736.000000,146436.000000,87625.000000,128.428760)}
{pt3dadd(200676.000000,146244.000000,87550.000000,130.888760)}
{pt3dadd(200520.000000,146052.000000,87500.000000,132.420296)}
{pt3dadd(200472.000000,145908.000000,87425.000000,133.985007)}
{pt3dadd(200352.000000,145812.000000,87250.000000,160.811480)}

{create adhoc8}
{access adhoc8}
{connect adhoc8(1), adhoc4(0)}
{nseg = 1}
{strdef color color = "White"}
{pt3dclear()}
{pt3dadd(202116.000000,155184.000000,93475.000000,406.362580)}
{pt3dadd(202320.000000,154704.000000,93250.000000,232.694693)}
{pt3dadd(202296.000000,154464.000000,93200.000000,186.585524)}
{pt3dadd(202188.000000,154320.000000,93150.000000,126.901430)}
{pt3dadd(202248.000000,154272.000000,92950.000000,108.843540)}

{create adhoc9}
{access adhoc9}
{connect adhoc9(1), adhoc3(0)}
{nseg = 1}
{strdef color color = "White"}
{pt3dclear()}
{pt3dadd(202824.000000,156492.000000,97975.000000,275.042200)}
{pt3dadd(202752.000000,156096.000000,98075.000000,239.291573)}
{pt3dadd(202752.000000,155844.000000,98200.000000,215.253848)}
{pt3dadd(202860.000000,155592.000000,98225.000000,188.028408)}
{pt3dadd(202884.000000,155376.000000,98325.000000,170.980264)}
{pt3dadd(202908.000000,155160.000000,98375.000000,151.244904)}
{pt3dadd(202956.000000,154956.000000,98475.000000,130.928863)}
{pt3dadd(202980.000000,154728.000000,98550.000000,122.066811)}
{pt3dadd(203004.000000,154500.000000,98600.000000,115.015914)}
{pt3dadd(202944.000000,154296.000000,98600.000000,118.798914)}
{pt3dadd(202896.000000,154080.000000,98575.000000,121.646674)}
{pt3dadd(202848.000000,153876.000000,98600.000000,126.114571)}
{pt3dadd(202824.000000,153672.000000,98625.000000,134.976623)}
{pt3dadd(202800.000000,153456.000000,98575.000000,142.027520)}
{pt3dadd(202704.000000,153228.000000,98400.000000,142.027520)}
{pt3dadd(202668.000000,153048.000000,98250.000000,137.856760)}
{pt3dadd(202668.000000,152856.000000,98250.000000,149.888640)}
{pt3dadd(202656.000000,152640.000000,98175.000000,154.716810)}
{pt3dadd(202656.000000,152436.000000,98100.000000,164.165690)}
{pt3dadd(202656.000000,152244.000000,98000.000000,171.841620)}
{pt3dadd(202644.000000,151992.000000,97950.000000,177.543916)}
{pt3dadd(202608.000000,151800.000000,97875.000000,177.543916)}
{pt3dadd(202620.000000,151584.000000,97725.000000,169.867986)}
{pt3dadd(202596.000000,151368.000000,97600.000000,177.891686)}
{pt3dadd(202536.000000,151164.000000,97525.000000,189.951116)}
{pt3dadd(202548.000000,150948.000000,97375.000000,205.307180)}
{pt3dadd(202452.000000,150744.000000,97250.000000,211.175852)}
{pt3dadd(202356.000000,150528.000000,97075.000000,230.911212)}
{pt3dadd(202392.000000,150300.000000,96900.000000,240.664072)}
{pt3dadd(202356.000000,150036.000000,96750.000000,245.534702)}
{pt3dadd(202296.000000,149784.000000,96625.000000,261.695486)}
{pt3dadd(202248.000000,149568.000000,96525.000000,273.603374)}
{pt3dadd(202224.000000,149364.000000,96375.000000,296.291270)}
{pt3dadd(202200.000000,149148.000000,96150.000000,304.961974)}
{pt3dadd(202212.000000,148896.000000,96000.000000,302.467258)}
{pt3dadd(202152.000000,148680.000000,95850.000000,291.177104)}
{pt3dadd(202092.000000,148440.000000,95800.000000,283.687024)}
{pt3dadd(202068.000000,148236.000000,95675.000000,254.528912)}
{pt3dadd(202032.000000,148020.000000,95500.000000,231.897912)}
{pt3dadd(202020.000000,147792.000000,95450.000000,214.165934)}
{pt3dadd(202044.000000,147588.000000,95375.000000,192.407704)}
{pt3dadd(202020.000000,147360.000000,95275.000000,187.989896)}
{pt3dadd(201984.000000,147144.000000,95250.000000,180.712162)}
{pt3dadd(201996.000000,147012.000000,95100.000000,160.396121)}
{pt3dadd(201984.000000,146940.000000,94950.000000,156.016825)}
{pt3dadd(201972.000000,146772.000000,94825.000000,153.169065)}
{pt3dadd(201948.000000,146556.000000,94750.000000,137.851513)}
{pt3dadd(201912.000000,146352.000000,94650.000000,124.813206)}
{pt3dadd(201876.000000,146148.000000,94550.000000,125.849811)}
{pt3dadd(201876.000000,146004.000000,94450.000000,122.066811)}
{pt3dadd(201924.000000,145896.000000,94375.000000,115.015914)}
{pt3dadd(201984.000000,145800.000000,94275.000000,112.432914)}
{pt3dadd(202008.000000,145668.000000,94175.000000,123.863107)}
{pt3dadd(202068.000000,145548.000000,93925.000000,134.256695)}
{pt3dadd(202116.000000,145416.000000,93725.000000,160.150969)}
{pt3dadd(202152.000000,145272.000000,93600.000000,180.467010)}
{pt3dadd(202248.000000,145140.000000,93400.000000,196.315154)}
{pt3dadd(202308.000000,144972.000000,93200.000000,237.869430)}
{pt3dadd(202356.000000,144804.000000,92950.000000,272.570238)}
{pt3dadd(202392.000000,144612.000000,92700.000000,289.539068)}
{pt3dadd(202428.000000,144588.000000,92425.000000,306.249784)}
{pt3dadd(202464.000000,144504.000000,92150.000000,317.590630)}
{pt3dadd(202440.000000,144348.000000,91925.000000,277.644468)}
{pt3dadd(202308.000000,144228.000000,91675.000000,242.943660)}
{pt3dadd(202092.000000,144036.000000,91500.000000,215.174028)}
{pt3dadd(201876.000000,143928.000000,91500.000000,198.463312)}
{pt3dadd(201648.000000,143916.000000,91475.000000,183.306202)}
{pt3dadd(201492.000000,143916.000000,91425.000000,180.166552)}
{pt3dadd(201264.000000,143940.000000,91375.000000,181.774666)}
{pt3dadd(201168.000000,144024.000000,91250.000000,176.451604)}
{pt3dadd(201072.000000,144084.000000,91150.000000,174.496932)}
{pt3dadd(200964.000000,144156.000000,91000.000000,171.035462)}
{pt3dadd(200724.000000,144168.000000,90900.000000,181.452846)}
{pt3dadd(200532.000000,144228.000000,90800.000000,195.200796)}
{pt3dadd(200388.000000,144288.000000,90675.000000,213.819376)}
{pt3dadd(200268.000000,144360.000000,90550.000000,232.484764)}
{pt3dadd(200076.000000,144444.000000,90475.000000,256.473214)}
{pt3dadd(199908.000000,144420.000000,90225.000000,270.433510)}
{pt3dadd(199728.000000,144468.000000,90100.000000,277.923590)}
{pt3dadd(199524.000000,144564.000000,89950.000000,260.993530)}
{pt3dadd(199332.000000,144588.000000,89775.000000,240.466550)}
{pt3dadd(199152.000000,144564.000000,89525.000000,216.478100)}
{pt3dadd(198984.000000,144576.000000,89350.000000,195.240070)}
{pt3dadd(198876.000000,144552.000000,89200.000000,183.332182)}
{pt3dadd(198732.000000,144576.000000,89000.000000,190.973804)}
{pt3dadd(198564.000000,144540.000000,88875.000000,194.790068)}
{pt3dadd(198396.000000,144540.000000,88775.000000,202.067802)}
{pt3dadd(198264.000000,144528.000000,88550.000000,207.390864)}
{pt3dadd(198096.000000,144564.000000,88425.000000,207.390864)}
{pt3dadd(197928.000000,144612.000000,88275.000000,196.452608)}
{pt3dadd(197772.000000,144540.000000,88150.000000,202.922824)}
{pt3dadd(197628.000000,144492.000000,88025.000000,209.393040)}
{pt3dadd(197424.000000,144456.000000,87900.000000,222.688558)}
{pt3dadd(197220.000000,144312.000000,87800.000000,224.843586)}
{pt3dadd(197004.000000,144204.000000,87750.000000,237.936870)}
{pt3dadd(196776.000000,144072.000000,87725.000000,242.807500)}
{pt3dadd(196524.000000,144012.000000,87725.000000,258.968284)}
{pt3dadd(196308.000000,143940.000000,87625.000000,273.442398)}
{pt3dadd(196092.000000,143916.000000,87575.000000,285.945678)}
{pt3dadd(195888.000000,143784.000000,87475.000000,313.835180)}
{pt3dadd(195660.000000,143748.000000,87375.000000,288.794300)}

{create adhoc10}
{access adhoc10}
{connect adhoc10(1), adhoc9(0)}
{nseg = 1}
{strdef color color = "White"}
{pt3dclear()}
{pt3dadd(195660.000000,143748.000000,87375.000000,288.794300)}
{pt3dadd(195492.000000,143928.000000,87175.000000,243.875607)}
{pt3dadd(195276.000000,144000.000000,87125.000000,196.725364)}
{pt3dadd(195060.000000,144132.000000,87050.000000,166.749504)}
{pt3dadd(194904.000000,144264.000000,87000.000000,145.691144)}
{pt3dadd(194676.000000,144372.000000,86925.000000,143.736472)}
{pt3dadd(194556.000000,144372.000000,86825.000000,163.792052)}
{pt3dadd(194508.000000,144444.000000,86725.000000,199.238852)}
{pt3dadd(194268.000000,144396.000000,86700.000000,256.791998)}
{pt3dadd(194064.000000,144396.000000,86600.000000,315.668144)}
{pt3dadd(193836.000000,144348.000000,86550.000000,385.487624)}
{pt3dadd(193584.000000,144480.000000,86500.000000,472.616404)}
{pt3dadd(193320.000000,144468.000000,86500.000000,544.389097)}
{pt3dadd(193056.000000,144468.000000,86350.000000,661.921800)}

{create adhoc11}
{access adhoc11}
{connect adhoc11(1), adhoc10(0)}
{nseg = 1}
{strdef color color = "White"}
{pt3dclear()}
{pt3dadd(193056.000000,144468.000000,86350.000000,661.921800)}
{pt3dadd(193188.000000,144060.000000,86400.000000,508.146980)}
{pt3dadd(193008.000000,143796.000000,86250.000000,426.123120)}
{pt3dadd(193020.000000,143568.000000,86300.000000,334.786904)}
{pt3dadd(193236.000000,143508.000000,86050.000000,270.471793)}
{pt3dadd(193320.000000,143400.000000,85950.000000,205.240720)}

{create adhoc12}
{access adhoc12}
{connect adhoc12(1), adhoc10(0)}
{nseg = 1}
{strdef color color = "White"}
{pt3dclear()}
{pt3dadd(193056.000000,144468.000000,86350.000000,661.921800)}
{pt3dadd(192972.000000,145140.000000,86350.000000,388.363123)}
{pt3dadd(193008.000000,145428.000000,86525.000000,281.075016)}
{pt3dadd(192624.000000,145500.000000,86450.000000,180.852952)}
{pt3dadd(192336.000000,145512.000000,86450.000000,149.448778)}
{pt3dadd(192108.000000,145548.000000,86500.000000,146.309128)}
{pt3dadd(191880.000000,145620.000000,86525.000000,148.892128)}
{pt3dadd(191676.000000,145644.000000,86550.000000,152.494986)}
{pt3dadd(191460.000000,145668.000000,86575.000000,155.791620)}
{pt3dadd(191280.000000,145764.000000,86550.000000,150.963450)}
{pt3dadd(191076.000000,145764.000000,86400.000000,157.564570)}
{pt3dadd(190884.000000,145812.000000,86325.000000,168.875042)}
{pt3dadd(190680.000000,145848.000000,86225.000000,183.463186)}
{pt3dadd(190476.000000,145896.000000,86225.000000,180.166552)}
{pt3dadd(190404.000000,146040.000000,86125.000000,188.629264)}
{pt3dadd(190212.000000,146112.000000,86025.000000,182.028144)}
{pt3dadd(190044.000000,146208.000000,85925.000000,168.134672)}
{pt3dadd(189852.000000,146268.000000,85825.000000,159.248824)}
{pt3dadd(189768.000000,146412.000000,85775.000000,159.248824)}
{pt3dadd(189636.000000,146508.000000,85725.000000,157.387232)}
{pt3dadd(189504.000000,146604.000000,85650.000000,174.274832)}
{pt3dadd(189360.000000,146616.000000,85550.000000,194.854227)}
{pt3dadd(189168.000000,146676.000000,85375.000000,237.591800)}

{create adhoc13}
{access adhoc13}
{connect adhoc13(1), adhoc12(0)}
{nseg = 1}
{strdef color color = "White"}
{pt3dclear()}
{pt3dadd(189168.000000,146676.000000,85375.000000,237.591800)}
{pt3dadd(189204.000000,146820.000000,85225.000000,225.610467)}
{pt3dadd(189420.000000,146952.000000,85150.000000,293.128524)}
{pt3dadd(189432.000000,147144.000000,85025.000000,354.523116)}
{pt3dadd(189444.000000,147300.000000,84750.000000,404.400332)}
{pt3dadd(189372.000000,147372.000000,84500.000000,460.924294)}
{pt3dadd(189444.000000,147432.000000,84250.000000,491.328250)}
{pt3dadd(189396.000000,147528.000000,83975.000000,467.451406)}
{pt3dadd(189324.000000,147648.000000,83700.000000,425.401558)}
{pt3dadd(189240.000000,147828.000000,83525.000000,387.583772)}
{pt3dadd(189288.000000,148128.000000,83275.000000,326.189180)}
{pt3dadd(189312.000000,148368.000000,83325.000000,277.361660)}
{pt3dadd(189372.000000,148596.000000,83375.000000,233.820500)}
{pt3dadd(189456.000000,148848.000000,83400.000000,226.277900)}

{create adhoc14}
{access adhoc14}
{connect adhoc14(1), adhoc12(0)}
{nseg = 1}
{strdef color color = "White"}
{pt3dclear()}
{pt3dadd(189168.000000,146676.000000,85375.000000,237.591800)}
{pt3dadd(188712.000000,146652.000000,85375.000000,164.098697)}
{pt3dadd(188472.000000,146652.000000,85400.000000,150.366374)}
{pt3dadd(188268.000000,146688.000000,85350.000000,136.618424)}
{pt3dadd(188064.000000,146664.000000,85300.000000,132.646274)}
{pt3dadd(187848.000000,146616.000000,85275.000000,141.508326)}
{pt3dadd(187632.000000,146616.000000,85250.000000,162.811610)}
{pt3dadd(187416.000000,146640.000000,85225.000000,162.811610)}
{pt3dadd(187200.000000,146568.000000,85200.000000,158.213350)}
{pt3dadd(187020.000000,146556.000000,85175.000000,160.796350)}
{pt3dadd(186876.000000,146544.000000,85100.000000,154.165590)}
{pt3dadd(186768.000000,146496.000000,85100.000000,133.849549)}
{pt3dadd(186564.000000,146544.000000,85100.000000,121.432113)}
{pt3dadd(186468.000000,146556.000000,85150.000000,112.992066)}
{pt3dadd(186324.000000,146556.000000,85175.000000,105.941169)}
{pt3dadd(186192.000000,146568.000000,85200.000000,102.673272)}
{pt3dadd(186072.000000,146592.000000,85125.000000,102.673272)}
{pt3dadd(185904.000000,146592.000000,85100.000000,109.388412)}
{pt3dadd(185724.000000,146616.000000,85100.000000,115.116309)}
{pt3dadd(185568.000000,146592.000000,85050.000000,129.843136)}
{pt3dadd(185412.000000,146628.000000,85000.000000,152.211585)}
{pt3dadd(185220.000000,146700.000000,84975.000000,174.580034)}
{pt3dadd(185004.000000,146808.000000,84900.000000,183.578964)}
{pt3dadd(184776.000000,146688.000000,84675.000000,186.291114)}
{pt3dadd(184596.000000,146556.000000,84550.000000,184.602594)}
{pt3dadd(184452.000000,146520.000000,84425.000000,173.664338)}
{pt3dadd(184320.000000,146448.000000,84350.000000,159.735936)}
{pt3dadd(184176.000000,146340.000000,84175.000000,147.134148)}
{pt3dadd(184044.000000,146232.000000,84000.000000,145.744998)}
{pt3dadd(183936.000000,146220.000000,83825.000000,138.434588)}
{pt3dadd(183780.000000,146244.000000,83750.000000,128.500237)}
{pt3dadd(183648.000000,146268.000000,83650.000000,132.300000)}

{create adhoc15}
{access adhoc15}
{connect adhoc15(1), adhoc9(0)}
{nseg = 1}
{strdef color color = "White"}
{pt3dclear()}
{pt3dadd(195660.000000,143748.000000,87375.000000,288.794300)}
{pt3dadd(195528.000000,143424.000000,87375.000000,186.149773)}
{pt3dadd(195528.000000,143196.000000,87400.000000,154.291866)}
{pt3dadd(195432.000000,143064.000000,87450.000000,120.533006)}
{pt3dadd(195300.000000,142908.000000,87450.000000,111.227852)}
{pt3dadd(195228.000000,142716.000000,87450.000000,113.459144)}
{pt3dadd(195132.000000,142572.000000,87450.000000,126.060932)}
{pt3dadd(195012.000000,142452.000000,87425.000000,138.478368)}
{pt3dadd(194868.000000,142308.000000,87425.000000,142.261368)}
{pt3dadd(194736.000000,142128.000000,87400.000000,144.604226)}
{pt3dadd(194604.000000,141936.000000,87325.000000,148.387226)}
{pt3dadd(194460.000000,141792.000000,87300.000000,143.559056)}
{pt3dadd(194364.000000,141564.000000,87250.000000,135.396760)}
{pt3dadd(194280.000000,141372.000000,87225.000000,136.785910)}
{pt3dadd(194208.000000,141168.000000,87200.000000,145.356320)}
{pt3dadd(194136.000000,141012.000000,87150.000000,172.581760)}
{pt3dadd(193992.000000,140820.000000,87075.000000,212.157256)}
{pt3dadd(193860.000000,140604.000000,87025.000000,265.559656)}
{pt3dadd(193764.000000,140376.000000,86900.000000,321.723652)}
{pt3dadd(193704.000000,140136.000000,86900.000000,373.289388)}
{pt3dadd(193512.000000,139920.000000,86750.000000,417.068204)}
{pt3dadd(193272.000000,139788.000000,86625.000000,440.945048)}
{pt3dadd(193116.000000,139584.000000,86350.000000,437.259220)}
{pt3dadd(193116.000000,139488.000000,86100.000000,412.569874)}
{pt3dadd(192948.000000,139452.000000,85850.000000,384.992588)}
{pt3dadd(192696.000000,139356.000000,85650.000000,333.723692)}
{pt3dadd(192528.000000,139308.000000,85450.000000,289.534866)}
{pt3dadd(192336.000000,139140.000000,85250.000000,256.866438)}
{pt3dadd(192216.000000,138972.000000,85150.000000,243.737998)}
{pt3dadd(192060.000000,138840.000000,85075.000000,218.141434)}
{pt3dadd(191892.000000,138828.000000,84950.000000,189.427702)}
{pt3dadd(191808.000000,138888.000000,84700.000000,160.265531)}
{pt3dadd(191664.000000,138864.000000,84600.000000,138.022015)}
{pt3dadd(191520.000000,138816.000000,84525.000000,111.235758)}
{pt3dadd(191388.000000,138780.000000,84425.000000,101.930604)}
{pt3dadd(191268.000000,138792.000000,84300.000000,124.174120)}
{pt3dadd(191148.000000,138780.000000,84175.000000,141.062315)}
{pt3dadd(191172.000000,138732.000000,83925.000000,205.240720)}

{create adhoc16}
{access adhoc16}
{connect adhoc16(1), adhoc15(0)}
{nseg = 1}
{strdef color color = "White"}
{pt3dclear()}
{pt3dadd(191172.000000,138732.000000,83925.000000,205.240720)}
{pt3dadd(191016.000000,138768.000000,83925.000000,168.085090)}
{pt3dadd(190896.000000,138780.000000,83850.000000,153.771054)}
{pt3dadd(190788.000000,138792.000000,83775.000000,140.505910)}
{pt3dadd(190704.000000,138792.000000,83675.000000,139.047300)}
{pt3dadd(190608.000000,138780.000000,83450.000000,135.075150)}
{pt3dadd(190524.000000,138756.000000,83350.000000,133.815150)}
{pt3dadd(190428.000000,138756.000000,83250.000000,130.212292)}
{pt3dadd(190332.000000,138744.000000,83100.000000,124.198000)}
{pt3dadd(190224.000000,138720.000000,82950.000000,124.198000)}
{pt3dadd(190116.000000,138732.000000,82825.000000,124.198000)}
{pt3dadd(189960.000000,138756.000000,82700.000000,132.768410)}
{pt3dadd(189828.000000,138696.000000,82625.000000,147.143148)}
{pt3dadd(189624.000000,138672.000000,82525.000000,172.892800)}
{pt3dadd(189408.000000,138648.000000,82450.000000,193.614924)}
{pt3dadd(189180.000000,138588.000000,82300.000000,223.423364)}
{pt3dadd(188940.000000,138612.000000,82225.000000,232.753506)}
{pt3dadd(188736.000000,138528.000000,82075.000000,245.415900)}
{pt3dadd(188532.000000,138480.000000,81825.000000,238.945684)}
{pt3dadd(188436.000000,138384.000000,81625.000000,230.099554)}
{pt3dadd(188220.000000,138348.000000,81475.000000,241.954218)}
{pt3dadd(188040.000000,138264.000000,81225.000000,284.189812)}
{pt3dadd(187872.000000,138120.000000,81125.000000,315.568054)}
{pt3dadd(187764.000000,137928.000000,80875.000000,389.119610)}
{pt3dadd(187536.000000,137796.000000,80625.000000,406.362580)}

{create adhoc17}
{access adhoc17}
{connect adhoc17(1), adhoc16(0)}
{nseg = 1}
{strdef color color = "White"}
{pt3dclear()}
{pt3dadd(187536.000000,137796.000000,80625.000000,406.362580)}
{pt3dadd(187728.000000,137016.000000,80750.000000,314.449910)}
{pt3dadd(187788.000000,136848.000000,80750.000000,275.042200)}

{create adhoc18}
{access adhoc18}
{connect adhoc18(1), adhoc17(0)}
{nseg = 1}
{strdef color color = "White"}
{pt3dclear()}
{pt3dadd(187788.000000,136848.000000,80750.000000,275.042200)}
{pt3dadd(188208.000000,136884.000000,80850.000000,194.647812)}
{pt3dadd(188316.000000,136824.000000,80925.000000,165.988687)}
{pt3dadd(188424.000000,136740.000000,81050.000000,140.152397)}
{pt3dadd(188520.000000,136656.000000,81125.000000,120.872961)}
{pt3dadd(188676.000000,136596.000000,81200.000000,124.140858)}
{pt3dadd(188844.000000,136488.000000,81175.000000,121.909566)}
{pt3dadd(188928.000000,136344.000000,81100.000000,125.881716)}
{pt3dadd(188976.000000,136176.000000,81075.000000,128.871862)}
{pt3dadd(189024.000000,135960.000000,81050.000000,142.562084)}
{pt3dadd(189060.000000,135744.000000,81050.000000,139.294187)}
{pt3dadd(189060.000000,135504.000000,81050.000000,137.270339)}
{pt3dadd(189096.000000,135336.000000,81075.000000,127.843049)}
{pt3dadd(189132.000000,135108.000000,81125.000000,118.537895)}
{pt3dadd(189192.000000,134940.000000,81175.000000,107.078965)}
{pt3dadd(189264.000000,134796.000000,81225.000000,129.447414)}
{pt3dadd(189264.000000,134580.000000,81250.000000,145.161484)}
{pt3dadd(189396.000000,134508.000000,81300.000000,162.648504)}
{pt3dadd(189432.000000,134280.000000,81250.000000,187.309722)}
{pt3dadd(189636.000000,134148.000000,81300.000000,221.068582)}
{pt3dadd(189756.000000,133932.000000,81325.000000,244.831134)}
{pt3dadd(189888.000000,133752.000000,81225.000000,286.774604)}
{pt3dadd(189972.000000,133596.000000,81125.000000,334.878870)}
{pt3dadd(189972.000000,133320.000000,81125.000000,376.963464)}
{pt3dadd(189828.000000,133092.000000,81150.000000,404.540750)}
{pt3dadd(189756.000000,132876.000000,81200.000000,418.950162)}
{pt3dadd(189624.000000,132660.000000,81225.000000,418.950162)}
{pt3dadd(189588.000000,132444.000000,81275.000000,397.293160)}
{pt3dadd(189492.000000,132216.000000,81200.000000,360.079196)}
{pt3dadd(189408.000000,132000.000000,81175.000000,338.422194)}
{pt3dadd(189372.000000,131784.000000,81175.000000,320.828822)}
{pt3dadd(189096.000000,132156.000000,81100.000000,288.682002)}
{pt3dadd(188868.000000,132120.000000,80975.000000,274.897132)}
{pt3dadd(188664.000000,132132.000000,80950.000000,265.608694)}
{pt3dadd(188568.000000,132144.000000,80825.000000,230.417343)}
{pt3dadd(188448.000000,132180.000000,80775.000000,215.502760)}

{create adhoc19}
{access adhoc19}
{connect adhoc19(1), adhoc17(0)}
{nseg = 1}
{strdef color color = "White"}
{pt3dclear()}
{pt3dadd(187788.000000,136848.000000,80750.000000,275.042200)}
{pt3dadd(187740.000000,136728.000000,80975.000000,154.661492)}
{pt3dadd(187740.000000,136596.000000,81000.000000,97.534263)}
{pt3dadd(187716.000000,136488.000000,81075.000000,103.660515)}

{create adhoc20}
{access adhoc20}
{connect adhoc20(1), adhoc16(0)}
{nseg = 1}
{strdef color color = "White"}
{pt3dclear()}
{pt3dadd(187536.000000,137796.000000,80625.000000,406.362580)}
{pt3dadd(187440.000000,137820.000000,80375.000000,406.685103)}
{pt3dadd(187212.000000,137880.000000,80125.000000,391.619718)}
{pt3dadd(187056.000000,137796.000000,79875.000000,362.736192)}
{pt3dadd(186780.000000,137784.000000,79575.000000,324.918406)}
{pt3dadd(186648.000000,137616.000000,79350.000000,295.516250)}
{pt3dadd(186492.000000,137496.000000,79200.000000,237.591800)}

{create adhoc21}
{access adhoc21}
{connect adhoc21(1), adhoc20(0)}
{nseg = 1}
{strdef color color = "White"}
{pt3dclear()}
{pt3dadd(186492.000000,137496.000000,79200.000000,237.591800)}
{pt3dadd(186468.000000,137340.000000,79125.000000,186.353053)}
{pt3dadd(186360.000000,137160.000000,79100.000000,137.534713)}
{pt3dadd(186336.000000,137064.000000,79000.000000,84.871468)}
{pt3dadd(186252.000000,137028.000000,78875.000000,39.068558)}

{create adhoc22}
{access adhoc22}
{connect adhoc22(1), adhoc20(0)}
{nseg = 1}
{strdef color color = "White"}
{pt3dclear()}
{pt3dadd(186492.000000,137496.000000,79200.000000,237.591800)}
{pt3dadd(186156.000000,137472.000000,79200.000000,136.119457)}
{pt3dadd(186060.000000,137412.000000,79125.000000,113.613146)}
{pt3dadd(185988.000000,137328.000000,79100.000000,83.084401)}
{pt3dadd(185784.000000,137232.000000,79000.000000,89.545845)}

{create adhoc23}
{access adhoc23}
{connect adhoc23(1), adhoc15(0)}
{nseg = 1}
{strdef color color = "White"}
{pt3dclear()}
{pt3dadd(191172.000000,138732.000000,83925.000000,205.240720)}
{pt3dadd(191244.000000,138672.000000,83875.000000,249.471370)}

{create adhoc24}
{access adhoc24}
{connect adhoc24(1), adhoc2(0)}
{nseg = 1}
{strdef color color = "White"}
{pt3dclear()}
{pt3dadd(199392.000000,164928.000000,101925.000000,288.794300)}
{pt3dadd(199056.000000,164508.000000,101875.000000,159.619522)}
{pt3dadd(198876.000000,164340.000000,101850.000000,158.564769)}
{pt3dadd(198876.000000,164232.000000,101775.000000,153.194899)}
{pt3dadd(198852.000000,164112.000000,101750.000000,176.044226)}
{pt3dadd(198804.000000,164076.000000,101675.000000,235.548034)}
{pt3dadd(198708.000000,163968.000000,101650.000000,261.144598)}
{pt3dadd(198708.000000,163920.000000,101500.000000,304.230402)}
{pt3dadd(198780.000000,163788.000000,101375.000000,354.579900)}
{pt3dadd(198828.000000,163728.000000,101275.000000,368.582820)}

{create adhoc25}
{access adhoc25}
{connect adhoc25(1), adhoc1(0)}
{nseg = 1}
{strdef color color = "White"}
{pt3dclear()}
{pt3dadd(188964.000000,188304.000000,109550.000000,448.014770)}
{pt3dadd(188844.000000,188796.000000,109225.000000,329.528097)}
{pt3dadd(188952.000000,189084.000000,108875.000000,303.507900)}
{pt3dadd(188844.000000,189108.000000,108525.000000,293.771682)}
{pt3dadd(188964.000000,189120.000000,108225.000000,319.581466)}
{pt3dadd(188928.000000,189180.000000,107925.000000,337.966000)}
{pt3dadd(188964.000000,189264.000000,107600.000000,346.912764)}
{pt3dadd(189072.000000,189228.000000,107400.000000,370.323004)}
{pt3dadd(189096.000000,189276.000000,107050.000000,392.388708)}
{pt3dadd(189204.000000,189156.000000,106625.000000,404.977704)}
{pt3dadd(189312.000000,189024.000000,106275.000000,424.991950)}
{pt3dadd(189336.000000,189108.000000,106125.000000,431.726876)}
{pt3dadd(189456.000000,189168.000000,105825.000000,451.741122)}
{pt3dadd(189456.000000,188820.000000,105275.000000,429.675418)}
{pt3dadd(189744.000000,188388.000000,104725.000000,429.675418)}
{pt3dadd(189924.000000,188172.000000,104050.000000,455.219234)}
{pt3dadd(190008.000000,188124.000000,103750.000000,500.777296)}
{pt3dadd(190200.000000,188016.000000,103500.000000,538.416064)}
{pt3dadd(190344.000000,187752.000000,103150.000000,610.155993)}
{pt3dadd(190476.000000,187644.000000,102900.000000,650.472500)}

{create adhoc26}
{access adhoc26}
{connect adhoc26(1), adhoc25(0)}
{nseg = 1}
{strdef color color = "White"}
{pt3dclear()}
{pt3dadd(190476.000000,187644.000000,102900.000000,650.472500)}
{pt3dadd(190476.000000,187608.000000,102525.000000,652.538727)}
{pt3dadd(190476.000000,187272.000000,102750.000000,591.008028)}
{pt3dadd(190476.000000,186960.000000,102875.000000,520.511318)}
{pt3dadd(190476.000000,186792.000000,102850.000000,436.679920)}
{pt3dadd(190476.000000,186540.000000,102725.000000,370.163184)}
{pt3dadd(190476.000000,186264.000000,102625.000000,291.801678)}
{pt3dadd(190476.000000,185856.000000,102475.000000,229.446880)}
{pt3dadd(190476.000000,185568.000000,102350.000000,208.266356)}
{pt3dadd(190500.000000,185256.000000,102275.000000,189.006694)}
{pt3dadd(190428.000000,184992.000000,102275.000000,186.555128)}
{pt3dadd(190368.000000,184668.000000,102275.000000,209.370386)}
{pt3dadd(190344.000000,184608.000000,102125.000000,248.261340)}
{pt3dadd(190308.000000,184392.000000,102025.000000,272.421754)}
{pt3dadd(190260.000000,184008.000000,101925.000000,304.525112)}
{pt3dadd(190212.000000,183792.000000,101875.000000,315.091656)}
{pt3dadd(190212.000000,183516.000000,101750.000000,326.186524)}
{pt3dadd(190212.000000,183204.000000,101650.000000,319.772316)}
{pt3dadd(190212.000000,182832.000000,101525.000000,313.954432)}
{pt3dadd(190212.000000,182604.000000,101450.000000,304.090626)}
{pt3dadd(190212.000000,182352.000000,101400.000000,301.252632)}
{pt3dadd(190212.000000,182112.000000,101300.000000,301.252632)}
{pt3dadd(190212.000000,181728.000000,101150.000000,304.381512)}
{pt3dadd(190212.000000,181548.000000,101075.000000,310.199396)}
{pt3dadd(190212.000000,181308.000000,101000.000000,310.199396)}
{pt3dadd(190212.000000,181068.000000,100975.000000,325.881086)}
{pt3dadd(190212.000000,180840.000000,100875.000000,339.366962)}
{pt3dadd(190272.000000,180396.000000,100775.000000,333.258192)}
{pt3dadd(190284.000000,180132.000000,100600.000000,324.737464)}
{pt3dadd(190548.000000,179616.000000,100475.000000,318.919580)}
{pt3dadd(190536.000000,179376.000000,100325.000000,297.960906)}
{pt3dadd(190536.000000,179184.000000,100225.000000,284.475030)}
{pt3dadd(190536.000000,178992.000000,100100.000000,284.475030)}
{pt3dadd(190560.000000,178800.000000,99950.000000,287.177874)}
{pt3dadd(190560.000000,178608.000000,99800.000000,284.475030)}
{pt3dadd(190560.000000,178368.000000,99650.000000,287.049170)}
{pt3dadd(190560.000000,178092.000000,99525.000000,284.069280)}
{pt3dadd(190560.000000,177852.000000,99350.000000,278.528442)}
{pt3dadd(190584.000000,177612.000000,99225.000000,273.251458)}
{pt3dadd(190584.000000,177396.000000,99075.000000,270.677318)}
{pt3dadd(190728.000000,177252.000000,98925.000000,268.103178)}
{pt3dadd(190800.000000,177024.000000,98775.000000,255.201814)}
{pt3dadd(190824.000000,176832.000000,98575.000000,255.201814)}
{pt3dadd(190824.000000,176700.000000,98325.000000,260.478798)}
{pt3dadd(190824.000000,176508.000000,98125.000000,274.702546)}
{pt3dadd(190824.000000,176328.000000,97925.000000,282.817524)}
{pt3dadd(190920.000000,176100.000000,97775.000000,290.178050)}
{pt3dadd(191016.000000,175968.000000,97625.000000,290.178050)}
{pt3dadd(191016.000000,175860.000000,97500.000000,299.124814)}
{pt3dadd(191040.000000,175824.000000,97375.000000,299.124814)}
{pt3dadd(191064.000000,175704.000000,97225.000000,305.233584)}
{pt3dadd(191088.000000,175536.000000,97050.000000,316.883192)}
{pt3dadd(191088.000000,175368.000000,96850.000000,328.532800)}
{pt3dadd(191088.000000,175176.000000,96650.000000,335.267726)}
{pt3dadd(191088.000000,174984.000000,96450.000000,323.618118)}
{pt3dadd(191088.000000,174792.000000,96250.000000,306.942804)}
{pt3dadd(191064.000000,174684.000000,95900.000000,313.677730)}
{pt3dadd(191064.000000,174552.000000,95750.000000,313.677730)}
{pt3dadd(191364.000000,174084.000000,95650.000000,313.677730)}
{pt3dadd(191424.000000,174012.000000,95450.000000,339.487514)}
{pt3dadd(191520.000000,173976.000000,95350.000000,347.216064)}
{pt3dadd(191652.000000,173796.000000,95200.000000,326.257390)}
{pt3dadd(191832.000000,173772.000000,95050.000000,309.582076)}
{pt3dadd(191808.000000,173700.000000,94850.000000,296.738380)}
{pt3dadd(191784.000000,173568.000000,94725.000000,268.354456)}
{pt3dadd(191784.000000,173436.000000,94525.000000,268.354456)}
{pt3dadd(191784.000000,173268.000000,94325.000000,259.226680)}
{pt3dadd(191808.000000,173136.000000,94200.000000,259.226680)}
{pt3dadd(191808.000000,173028.000000,93850.000000,246.325316)}
{pt3dadd(191808.000000,172872.000000,93675.000000,243.873750)}
{pt3dadd(191808.000000,172704.000000,93550.000000,246.711744)}
{pt3dadd(191880.000000,172572.000000,93475.000000,258.413660)}
{pt3dadd(191904.000000,172380.000000,93400.000000,256.078840)}
{pt3dadd(191940.000000,172200.000000,93325.000000,268.980204)}
{pt3dadd(191904.000000,171672.000000,93100.000000,276.708754)}
{pt3dadd(191880.000000,171276.000000,93025.000000,266.142210)}
{pt3dadd(191880.000000,171012.000000,92950.000000,268.845054)}
{pt3dadd(191880.000000,170736.000000,92825.000000,291.140516)}
{pt3dadd(191880.000000,170460.000000,92775.000000,291.140516)}
{pt3dadd(191880.000000,169992.000000,92575.000000,300.087280)}
{pt3dadd(191880.000000,169584.000000,92450.000000,348.134550)}
{pt3dadd(191664.000000,169176.000000,92400.000000,383.830486)}
{pt3dadd(191472.000000,168792.000000,92175.000000,402.891674)}
{pt3dadd(191328.000000,168384.000000,92075.000000,431.346960)}
{pt3dadd(191148.000000,168024.000000,92075.000000,441.703956)}
{pt3dadd(190956.000000,167652.000000,92050.000000,417.066926)}
{pt3dadd(190800.000000,167268.000000,92050.000000,400.674750)}
{pt3dadd(190728.000000,166920.000000,92050.000000,381.613562)}
{pt3dadd(190716.000000,166596.000000,92050.000000,362.552374)}
{pt3dadd(190740.000000,166284.000000,92050.000000,366.355554)}
{pt3dadd(190668.000000,165996.000000,92125.000000,366.355554)}
{pt3dadd(190668.000000,165720.000000,92125.000000,359.283886)}
{pt3dadd(190740.000000,165360.000000,92300.000000,370.158734)}
{pt3dadd(190824.000000,165000.000000,92425.000000,363.744526)}
{pt3dadd(190932.000000,164640.000000,92550.000000,367.737860)}
{pt3dadd(191004.000000,164316.000000,92650.000000,383.349450)}
{pt3dadd(191136.000000,163944.000000,92750.000000,380.064122)}
{pt3dadd(191256.000000,163572.000000,92750.000000,338.614652)}
{pt3dadd(191340.000000,163200.000000,92750.000000,325.068218)}
{pt3dadd(191352.000000,162912.000000,92775.000000,290.239394)}
{pt3dadd(191280.000000,162756.000000,92625.000000,261.784108)}
{pt3dadd(191244.000000,162468.000000,92475.000000,252.837344)}
{pt3dadd(191184.000000,162276.000000,92375.000000,298.280148)}
{pt3dadd(191304.000000,162144.000000,92275.000000,329.115638)}
{pt3dadd(191280.000000,161928.000000,92150.000000,349.076280)}
{pt3dadd(191232.000000,161616.000000,92075.000000,343.535442)}
{pt3dadd(191184.000000,161424.000000,91950.000000,335.806892)}
{pt3dadd(191304.000000,161064.000000,91850.000000,311.544612)}
{pt3dadd(191616.000000,160800.000000,91850.000000,285.734828)}
{pt3dadd(192072.000000,160620.000000,91850.000000,289.184426)}
{pt3dadd(192420.000000,160284.000000,91750.000000,300.834034)}
{pt3dadd(192516.000000,160068.000000,91650.000000,324.244274)}
{pt3dadd(192576.000000,159876.000000,91425.000000,309.119272)}
{pt3dadd(192588.000000,159540.000000,91250.000000,317.640000)}
{pt3dadd(193008.000000,159360.000000,91250.000000,307.776194)}
{pt3dadd(193356.000000,159096.000000,91150.000000,307.776194)}
{pt3dadd(193488.000000,158976.000000,91050.000000,311.398264)}
{pt3dadd(193596.000000,158928.000000,90950.000000,323.685272)}
{pt3dadd(193620.000000,158772.000000,90825.000000,323.685272)}
{pt3dadd(193800.000000,158544.000000,90700.000000,326.814152)}
{pt3dadd(193896.000000,158424.000000,90575.000000,326.814152)}
{pt3dadd(193980.000000,158292.000000,90450.000000,302.233408)}
{pt3dadd(193968.000000,158124.000000,90325.000000,296.956424)}
{pt3dadd(194028.000000,158016.000000,90200.000000,285.861556)}
{pt3dadd(194028.000000,157896.000000,90075.000000,274.211948)}
{pt3dadd(194028.000000,157716.000000,89850.000000,262.562340)}
{pt3dadd(194028.000000,157536.000000,89725.000000,270.677318)}
{pt3dadd(194028.000000,157356.000000,89600.000000,278.792296)}
{pt3dadd(194028.000000,157176.000000,89475.000000,293.016044)}
{pt3dadd(194100.000000,156960.000000,89275.000000,307.950980)}
{pt3dadd(194100.000000,156648.000000,89100.000000,319.600588)}
{pt3dadd(194100.000000,156336.000000,89000.000000,316.762594)}
{pt3dadd(194100.000000,155976.000000,88900.000000,337.031540)}
{pt3dadd(194100.000000,155616.000000,88800.000000,337.031540)}
{pt3dadd(194052.000000,155292.000000,88575.000000,344.103208)}
{pt3dadd(193944.000000,155100.000000,88450.000000,354.460204)}
{pt3dadd(193896.000000,154764.000000,88325.000000,377.567144)}
{pt3dadd(193896.000000,154548.000000,88200.000000,366.692296)}
{pt3dadd(193836.000000,154464.000000,88075.000000,352.468548)}
{pt3dadd(193836.000000,154380.000000,87975.000000,333.164788)}
{pt3dadd(193836.000000,154248.000000,87750.000000,326.093120)}
{pt3dadd(193836.000000,154080.000000,87550.000000,302.986180)}
{pt3dadd(193836.000000,153852.000000,87350.000000,283.025538)}
{pt3dadd(193836.000000,153600.000000,87125.000000,288.302522)}
{pt3dadd(193644.000000,153468.000000,87000.000000,285.599678)}
{pt3dadd(193656.000000,153324.000000,86875.000000,268.090602)}
{pt3dadd(193644.000000,153240.000000,86725.000000,262.813618)}
{pt3dadd(193596.000000,153120.000000,86650.000000,273.380162)}
{pt3dadd(193512.000000,152952.000000,86550.000000,285.612254)}
{pt3dadd(193440.000000,152724.000000,86475.000000,303.996788)}
{pt3dadd(193440.000000,152532.000000,86475.000000,312.111766)}
{pt3dadd(193392.000000,152376.000000,86400.000000,312.111766)}
{pt3dadd(193308.000000,152256.000000,86300.000000,324.955462)}
{pt3dadd(193320.000000,152148.000000,86200.000000,298.318610)}
{pt3dadd(193248.000000,151980.000000,86050.000000,291.583684)}
{pt3dadd(193104.000000,151740.000000,85950.000000,288.745690)}
{pt3dadd(193044.000000,151800.000000,85850.000000,288.745690)}
{pt3dadd(192960.000000,151800.000000,85475.000000,292.367760)}
{pt3dadd(192876.000000,151800.000000,85100.000000,329.879460)}
{pt3dadd(192828.000000,151476.000000,84775.000000,320.932696)}
{pt3dadd(192828.000000,151248.000000,84550.000000,306.527936)}
{pt3dadd(192708.000000,151104.000000,84125.000000,311.804920)}
{pt3dadd(192468.000000,151104.000000,83950.000000,295.339154)}
{pt3dadd(192336.000000,150888.000000,83725.000000,266.955230)}
{pt3dadd(192216.000000,150744.000000,83650.000000,272.773114)}
{pt3dadd(192144.000000,150504.000000,83450.000000,306.481634)}
{pt3dadd(192036.000000,150396.000000,83350.000000,329.588574)}
{pt3dadd(191880.000000,150204.000000,83225.000000,326.750580)}
{pt3dadd(191760.000000,150072.000000,83125.000000,313.685034)}
{pt3dadd(191688.000000,149964.000000,83000.000000,295.580142)}
{pt3dadd(191604.000000,149880.000000,82850.000000,263.989374)}
{pt3dadd(191484.000000,149808.000000,82725.000000,233.153884)}
{pt3dadd(191340.000000,149664.000000,82600.000000,220.866876)}
{pt3dadd(191340.000000,149484.000000,82475.000000,233.932422)}
{pt3dadd(191220.000000,149292.000000,82375.000000,252.037314)}
{pt3dadd(191052.000000,149124.000000,82250.000000,259.047338)}
{pt3dadd(190944.000000,149052.000000,82125.000000,254.488880)}
{pt3dadd(190764.000000,148884.000000,82000.000000,259.047338)}
{pt3dadd(190596.000000,148728.000000,81950.000000,254.260952)}
{pt3dadd(190416.000000,148644.000000,81950.000000,254.260952)}
{pt3dadd(190236.000000,148548.000000,81950.000000,275.219626)}
{pt3dadd(189852.000000,148224.000000,81700.000000,303.188324)}
{pt3dadd(189576.000000,148056.000000,81575.000000,338.017148)}
{pt3dadd(189336.000000,147852.000000,81375.000000,353.898402)}
{pt3dadd(188940.000000,147588.000000,81125.000000,338.017148)}
{pt3dadd(188760.000000,147384.000000,80825.000000,310.048450)}
{pt3dadd(188700.000000,147264.000000,80700.000000,279.962000)}
{pt3dadd(188580.000000,147240.000000,80575.000000,240.574718)}
{pt3dadd(188532.000000,146952.000000,80275.000000,216.414304)}
{pt3dadd(188484.000000,146880.000000,80175.000000,223.774830)}
{pt3dadd(188412.000000,146784.000000,80050.000000,223.774830)}
{pt3dadd(188376.000000,146640.000000,79950.000000,216.265388)}
{pt3dadd(188328.000000,146592.000000,79825.000000,216.265388)}
{pt3dadd(188280.000000,146268.000000,79625.000000,212.693716)}
{pt3dadd(188280.000000,146124.000000,79425.000000,193.482358)}
{pt3dadd(188208.000000,145932.000000,79075.000000,189.347698)}
{pt3dadd(188208.000000,145644.000000,78775.000000,203.533350)}
{pt3dadd(188208.000000,145332.000000,78575.000000,205.756988)}
{pt3dadd(188172.000000,145128.000000,78400.000000,239.903282)}
{pt3dadd(188124.000000,144996.000000,78325.000000,281.121244)}
{pt3dadd(187944.000000,144672.000000,78175.000000,303.360796)}
{pt3dadd(187872.000000,144552.000000,78050.000000,330.393106)}
{pt3dadd(187752.000000,144204.000000,77775.000000,349.403240)}
{pt3dadd(187704.000000,144168.000000,77675.000000,342.989032)}
{pt3dadd(187704.000000,143928.000000,77525.000000,320.982428)}
{pt3dadd(187632.000000,143784.000000,77400.000000,327.396636)}
{pt3dadd(187452.000000,143700.000000,77275.000000,310.930870)}
{pt3dadd(187380.000000,143592.000000,77150.000000,307.801990)}
{pt3dadd(187320.000000,143472.000000,77050.000000,294.255556)}
{pt3dadd(187272.000000,143304.000000,76925.000000,278.615870)}
{pt3dadd(187260.000000,143220.000000,76800.000000,258.655228)}
{pt3dadd(187128.000000,143148.000000,76700.000000,237.474704)}
{pt3dadd(187092.000000,143052.000000,76550.000000,219.369812)}
{pt3dadd(187056.000000,142920.000000,76425.000000,217.034992)}
{pt3dadd(186984.000000,142788.000000,76300.000000,247.609614)}
{pt3dadd(186960.000000,142704.000000,76150.000000,230.184346)}
{pt3dadd(186960.000000,142488.000000,75900.000000,243.249892)}
{pt3dadd(186960.000000,142260.000000,75700.000000,245.473530)}
{pt3dadd(186936.000000,142020.000000,75425.000000,231.963384)}
{pt3dadd(186936.000000,141792.000000,75200.000000,187.735608)}
{pt3dadd(186900.000000,141612.000000,75125.000000,196.467758)}
{pt3dadd(186876.000000,141432.000000,74975.000000,183.402212)}
{pt3dadd(186588.000000,141216.000000,74875.000000,169.892066)}
{pt3dadd(186360.000000,141084.000000,74700.000000,159.167566)}
{pt3dadd(186264.000000,140880.000000,74500.000000,153.806784)}
{pt3dadd(186192.000000,140820.000000,74400.000000,140.771088)}
{pt3dadd(186096.000000,140772.000000,74275.000000,127.117934)}
{pt3dadd(186072.000000,140688.000000,74150.000000,125.537632)}
{pt3dadd(186012.000000,140616.000000,74025.000000,152.107098)}
{pt3dadd(185928.000000,140508.000000,73900.000000,186.760720)}
{pt3dadd(185868.000000,140364.000000,73775.000000,203.931076)}
{pt3dadd(185796.000000,140136.000000,73650.000000,235.926760)}
{pt3dadd(185676.000000,140076.000000,73525.000000,266.898462)}
{pt3dadd(185640.000000,140028.000000,73400.000000,271.924168)}
{pt3dadd(185604.000000,139944.000000,73275.000000,254.455088)}
{pt3dadd(185508.000000,139704.000000,73100.000000,241.588278)}
{pt3dadd(185412.000000,139584.000000,73000.000000,200.031498)}
{pt3dadd(185424.000000,139416.000000,72950.000000,152.656834)}
{pt3dadd(185400.000000,139428.000000,72625.000000,115.361207)}
{pt3dadd(185400.000000,139428.000000,72425.000000,96.372727)}
{pt3dadd(185400.000000,139380.000000,72200.000000,85.140245)}
{pt3dadd(185400.000000,139356.000000,71950.000000,101.543207)}
{pt3dadd(185400.000000,139332.000000,71700.000000,128.695227)}
{pt3dadd(185400.000000,139272.000000,71425.000000,158.630328)}
{pt3dadd(185352.000000,139152.000000,71100.000000,200.628726)}
{pt3dadd(185352.000000,139080.000000,70975.000000,239.853020)}
{pt3dadd(185400.000000,138984.000000,70850.000000,280.688528)}
{pt3dadd(185616.000000,138972.000000,70425.000000,300.911172)}
{pt3dadd(185628.000000,138984.000000,70300.000000,308.271698)}
{pt3dadd(185604.000000,138984.000000,70125.000000,295.370334)}
{pt3dadd(185592.000000,138936.000000,69975.000000,274.189810)}
{pt3dadd(185520.000000,138936.000000,69725.000000,240.165590)}
{pt3dadd(185412.000000,138936.000000,69350.000000,201.172778)}
{pt3dadd(185256.000000,138936.000000,68925.000000,166.519156)}
{pt3dadd(185160.000000,138876.000000,68725.000000,143.407598)}
{pt3dadd(185064.000000,138828.000000,68525.000000,125.363828)}
{pt3dadd(184944.000000,138708.000000,68350.000000,108.338732)}
{pt3dadd(184824.000000,138660.000000,68250.000000,127.108900)}
{pt3dadd(184824.000000,138624.000000,68125.000000,156.736816)}
{pt3dadd(184656.000000,138552.000000,67950.000000,171.569214)}
{pt3dadd(184608.000000,138528.000000,67750.000000,184.381998)}
{pt3dadd(184500.000000,138528.000000,67575.000000,188.992144)}
{pt3dadd(184464.000000,138552.000000,67475.000000,175.304662)}
{pt3dadd(184452.000000,138552.000000,67350.000000,151.037528)}
{pt3dadd(184416.000000,138564.000000,67225.000000,144.226240)}
{pt3dadd(184272.000000,138540.000000,67000.000000,142.645938)}
{pt3dadd(184188.000000,138540.000000,66750.000000,148.249600)}
{pt3dadd(184140.000000,138564.000000,66625.000000,154.427640)}
{pt3dadd(184044.000000,138528.000000,66500.000000,153.248396)}
{pt3dadd(183972.000000,138504.000000,66400.000000,147.644734)}
{pt3dadd(183864.000000,138540.000000,66225.000000,135.442086)}
{pt3dadd(183780.000000,139008.000000,66125.000000,122.315469)}
{pt3dadd(183744.000000,139080.000000,66000.000000,105.949236)}
{pt3dadd(183684.000000,139008.000000,65850.000000,103.756538)}
{pt3dadd(183504.000000,138984.000000,65650.000000,97.157552)}
{pt3dadd(183444.000000,139008.000000,65525.000000,92.233286)}
{pt3dadd(183312.000000,139068.000000,65425.000000,91.353317)}
{pt3dadd(183132.000000,139056.000000,65200.000000,96.458824)}
{pt3dadd(182976.000000,139068.000000,65100.000000,92.666046)}
{pt3dadd(182688.000000,139128.000000,64850.000000,88.465732)}
{pt3dadd(182496.000000,139140.000000,64650.000000,89.949835)}
{pt3dadd(182376.000000,139176.000000,64550.000000,87.553459)}
{pt3dadd(182244.000000,139176.000000,64475.000000,80.729916)}
{pt3dadd(182148.000000,139164.000000,64400.000000,78.333540)}
{pt3dadd(181980.000000,139092.000000,64375.000000,78.612262)}
{pt3dadd(181800.000000,139020.000000,64275.000000,76.015080)}

{create adhoc27}
{access adhoc27}
{connect adhoc27(1), adhoc25(0)}
{nseg = 1}
{strdef color color = "White"}
{pt3dclear()}
{pt3dadd(190476.000000,187644.000000,102900.000000,650.472500)}
{pt3dadd(190632.000000,187764.000000,102375.000000,619.989280)}
{pt3dadd(190752.000000,187776.000000,102125.000000,571.004524)}
{pt3dadd(190860.000000,187860.000000,101925.000000,537.988540)}
{pt3dadd(190920.000000,187968.000000,101750.000000,521.921432)}
{pt3dadd(190956.000000,188004.000000,101475.000000,490.477644)}
{pt3dadd(191028.000000,188088.000000,100900.000000,472.405274)}
{pt3dadd(191016.000000,188088.000000,100675.000000,493.326306)}
{pt3dadd(190896.000000,188052.000000,100350.000000,498.180230)}
{pt3dadd(190788.000000,188004.000000,99925.000000,506.320097)}
{pt3dadd(190728.000000,188172.000000,99750.000000,509.662200)}

{create adhoc28}
{access adhoc28}
{connect adhoc28(1), adhoc27(0)}
{nseg = 1}
{strdef color color = "White"}
{pt3dclear()}
{pt3dadd(190728.000000,188172.000000,99750.000000,509.662200)}
{pt3dadd(190968.000000,188412.000000,99575.000000,334.103633)}
{pt3dadd(191160.000000,188472.000000,99225.000000,294.300028)}
{pt3dadd(191208.000000,188364.000000,99100.000000,264.809074)}
{pt3dadd(191376.000000,188148.000000,98825.000000,282.913966)}
{pt3dadd(191388.000000,188460.000000,98650.000000,294.563574)}
{pt3dadd(191568.000000,188424.000000,98450.000000,289.777188)}
{pt3dadd(191892.000000,188376.000000,98275.000000,284.010024)}
{pt3dadd(192108.000000,188412.000000,98075.000000,253.923574)}
{pt3dadd(192192.000000,188388.000000,97825.000000,240.377140)}
{pt3dadd(192372.000000,188436.000000,97675.000000,226.153392)}
{pt3dadd(192504.000000,188292.000000,97425.000000,223.929754)}
{pt3dadd(192660.000000,188184.000000,97150.000000,244.101678)}
{pt3dadd(192948.000000,188004.000000,96875.000000,246.219430)}
{pt3dadd(192960.000000,187908.000000,96625.000000,253.947980)}
{pt3dadd(193212.000000,187656.000000,96525.000000,274.906654)}
{pt3dadd(193068.000000,187536.000000,96175.000000,287.193662)}
{pt3dadd(193092.000000,187428.000000,95850.000000,302.875352)}
{pt3dadd(192996.000000,187224.000000,95525.000000,334.466120)}
{pt3dadd(193044.000000,187152.000000,95275.000000,365.759400)}
{pt3dadd(193092.000000,186840.000000,95150.000000,385.773646)}
{pt3dadd(193080.000000,186552.000000,94800.000000,408.880586)}
{pt3dadd(193080.000000,186252.000000,94300.000000,424.492176)}
{pt3dadd(193080.000000,185940.000000,93950.000000,455.457680)}
{pt3dadd(193080.000000,185628.000000,93600.000000,479.785124)}
{pt3dadd(192684.000000,185604.000000,93475.000000,489.261832)}
{pt3dadd(192480.000000,185388.000000,93225.000000,506.473612)}
{pt3dadd(192492.000000,185124.000000,92900.000000,506.473612)}
{pt3dadd(192360.000000,184908.000000,92650.000000,496.523068)}
{pt3dadd(192264.000000,184872.000000,92425.000000,472.195624)}
{pt3dadd(192264.000000,184800.000000,92200.000000,454.123254)}
{pt3dadd(192168.000000,184584.000000,91850.000000,429.486224)}
{pt3dadd(192168.000000,184464.000000,91600.000000,425.293218)}
{pt3dadd(192108.000000,184344.000000,91475.000000,440.595222)}
{pt3dadd(191952.000000,184128.000000,91275.000000,449.620662)}
{pt3dadd(191664.000000,183852.000000,91000.000000,458.216324)}
{pt3dadd(191592.000000,183576.000000,90750.000000,492.803898)}
{pt3dadd(191556.000000,183492.000000,90600.000000,510.876268)}
{pt3dadd(191460.000000,183312.000000,90400.000000,516.495296)}
{pt3dadd(191448.000000,183144.000000,90200.000000,531.797300)}
{pt3dadd(191328.000000,182808.000000,89950.000000,531.797300)}
{pt3dadd(191232.000000,182616.000000,89750.000000,504.634976)}
{pt3dadd(191268.000000,182172.000000,89475.000000,486.562606)}
{pt3dadd(191232.000000,181776.000000,89275.000000,448.429794)}
{pt3dadd(191172.000000,181488.000000,88975.000000,408.490760)}
{pt3dadd(191016.000000,181152.000000,88775.000000,392.098584)}
{pt3dadd(190800.000000,180960.000000,88575.000000,388.295404)}
{pt3dadd(190596.000000,180696.000000,88300.000000,370.141894)}
{pt3dadd(190176.000000,180108.000000,87900.000000,344.332110)}
{pt3dadd(190068.000000,179928.000000,87750.000000,334.468304)}
{pt3dadd(189996.000000,179772.000000,87575.000000,320.982428)}
{pt3dadd(189996.000000,179736.000000,87450.000000,307.496552)}
{pt3dadd(189528.000000,179640.000000,87225.000000,317.853548)}
{pt3dadd(189384.000000,179592.000000,87025.000000,347.656666)}
{pt3dadd(189384.000000,179244.000000,86550.000000,347.656666)}
{pt3dadd(188952.000000,179220.000000,86275.000000,350.785546)}
{pt3dadd(188760.000000,179160.000000,86025.000000,344.967662)}
{pt3dadd(188460.000000,178908.000000,85775.000000,337.895994)}
{pt3dadd(188244.000000,178776.000000,85550.000000,310.795720)}
{pt3dadd(187872.000000,178776.000000,85425.000000,297.249286)}
{pt3dadd(187584.000000,178656.000000,84950.000000,294.120406)}
{pt3dadd(187248.000000,178536.000000,84775.000000,291.417562)}
{pt3dadd(186852.000000,178452.000000,84450.000000,288.132234)}
{pt3dadd(186612.000000,178188.000000,84200.000000,300.364326)}
{pt3dadd(186420.000000,177972.000000,83925.000000,331.199816)}
{pt3dadd(186060.000000,177948.000000,83750.000000,344.685692)}
{pt3dadd(185856.000000,177780.000000,83525.000000,370.495476)}
{pt3dadd(185484.000000,177636.000000,83250.000000,392.841992)}
{pt3dadd(185196.000000,177468.000000,83000.000000,407.710174)}
{pt3dadd(185076.000000,177396.000000,82775.000000,393.549998)}
{pt3dadd(184824.000000,177288.000000,82550.000000,377.084232)}
{pt3dadd(184548.000000,177240.000000,82425.000000,356.815286)}
{pt3dadd(184380.000000,176988.000000,82175.000000,365.840726)}
{pt3dadd(184104.000000,177048.000000,81925.000000,374.436388)}
{pt3dadd(183720.000000,176844.000000,81550.000000,388.596564)}
{pt3dadd(183612.000000,176712.000000,81300.000000,394.705334)}
{pt3dadd(183504.000000,176592.000000,80850.000000,396.715047)}
{pt3dadd(183288.000000,176580.000000,80475.000000,328.532800)}

{create adhoc29}
{access adhoc29}
{connect adhoc29(1), adhoc28(0)}
{nseg = 1}
{strdef color color = "White"}
{pt3dclear()}
{pt3dadd(183288.000000,176580.000000,80475.000000,328.532800)}
{pt3dadd(183120.000000,176928.000000,80250.000000,298.710253)}
{pt3dadd(182964.000000,176952.000000,80125.000000,298.421732)}
{pt3dadd(182880.000000,176976.000000,80000.000000,292.312962)}
{pt3dadd(182784.000000,177036.000000,79800.000000,301.259726)}
{pt3dadd(182652.000000,177120.000000,79675.000000,304.097720)}
{pt3dadd(182580.000000,177192.000000,79475.000000,277.686210)}
{pt3dadd(182556.000000,177300.000000,79350.000000,260.443456)}
{pt3dadd(182424.000000,177300.000000,79125.000000,243.200702)}
{pt3dadd(182424.000000,177336.000000,79000.000000,221.966930)}
{pt3dadd(182340.000000,177396.000000,78875.000000,209.065566)}
{pt3dadd(182136.000000,177408.000000,78650.000000,214.296552)}
{pt3dadd(182052.000000,177540.000000,78375.000000,205.127796)}
{pt3dadd(181980.000000,177648.000000,78150.000000,211.804006)}
{pt3dadd(181932.000000,177756.000000,78025.000000,233.037778)}
{pt3dadd(181848.000000,177888.000000,77825.000000,262.404908)}
{pt3dadd(181776.000000,177996.000000,77575.000000,286.565322)}
{pt3dadd(181836.000000,178188.000000,77325.000000,307.435994)}
{pt3dadd(181836.000000,178380.000000,77025.000000,300.759784)}
{pt3dadd(181836.000000,178500.000000,76650.000000,275.391352)}
{pt3dadd(181836.000000,178524.000000,76200.000000,239.665924)}
{pt3dadd(181812.000000,178608.000000,76000.000000,210.274524)}
{pt3dadd(181548.000000,178668.000000,75825.000000,194.634838)}
{pt3dadd(181560.000000,178656.000000,75625.000000,190.697068)}
{pt3dadd(181464.000000,178716.000000,75475.000000,186.946812)}
{pt3dadd(181464.000000,178896.000000,75075.000000,173.911116)}
{pt3dadd(181488.000000,178872.000000,74950.000000,164.309704)}
{pt3dadd(181488.000000,178836.000000,74800.000000,154.559992)}
{pt3dadd(181596.000000,178800.000000,74625.000000,162.839152)}
{pt3dadd(181656.000000,178800.000000,74200.000000,175.282526)}
{pt3dadd(181704.000000,178800.000000,73950.000000,190.335130)}
{pt3dadd(181656.000000,178800.000000,73700.000000,211.223050)}
{pt3dadd(181524.000000,178800.000000,73400.000000,227.028284)}
{pt3dadd(181548.000000,178884.000000,73175.000000,237.091654)}
{pt3dadd(181476.000000,178932.000000,72950.000000,234.756834)}
{pt3dadd(181296.000000,179004.000000,72800.000000,236.874586)}
{pt3dadd(181212.000000,179148.000000,72625.000000,243.884610)}
{pt3dadd(181116.000000,179160.000000,72500.000000,248.443068)}
{pt3dadd(181044.000000,179196.000000,72350.000000,254.260952)}
{pt3dadd(180996.000000,179292.000000,72200.000000,295.617602)}
{pt3dadd(180996.000000,179388.000000,71850.000000,335.004884)}
{pt3dadd(180996.000000,179556.000000,71375.000000,352.513960)}
{pt3dadd(180996.000000,179748.000000,70950.000000,366.060394)}
{pt3dadd(181116.000000,179808.000000,70750.000000,366.060394)}
{pt3dadd(181140.000000,179808.000000,70500.000000,334.767114)}
{pt3dadd(181116.000000,179760.000000,70375.000000,299.938290)}
{pt3dadd(181080.000000,179772.000000,70225.000000,293.524082)}
{pt3dadd(181032.000000,179676.000000,69950.000000,273.301438)}
{pt3dadd(181008.000000,179712.000000,69825.000000,249.141024)}
{pt3dadd(180972.000000,179676.000000,69700.000000,241.412474)}
{pt3dadd(180996.000000,179700.000000,69575.000000,243.864040)}
{pt3dadd(180864.000000,179676.000000,69375.000000,223.641396)}
{pt3dadd(180828.000000,179628.000000,69225.000000,238.046156)}
{pt3dadd(180792.000000,179640.000000,69075.000000,272.070376)}
{pt3dadd(180612.000000,179604.000000,68950.000000,261.456396)}
{pt3dadd(180384.000000,179568.000000,68850.000000,252.328620)}
{pt3dadd(180336.000000,179496.000000,68650.000000,261.456396)}
{pt3dadd(180072.000000,179352.000000,68525.000000,245.034728)}
{pt3dadd(179904.000000,179220.000000,68325.000000,217.066030)}
{pt3dadd(179484.000000,179112.000000,68100.000000,223.121552)}
{pt3dadd(179172.000000,179112.000000,68025.000000,223.121552)}
{pt3dadd(178908.000000,179112.000000,67850.000000,216.111528)}
{pt3dadd(178668.000000,179112.000000,67675.000000,218.128436)}
{pt3dadd(178344.000000,179112.000000,67450.000000,216.010684)}
{pt3dadd(178116.000000,179112.000000,67325.000000,213.892932)}
{pt3dadd(177948.000000,179076.000000,67100.000000,208.125768)}
{pt3dadd(177672.000000,178968.000000,66875.000000,193.753914)}
{pt3dadd(177168.000000,178980.000000,66725.000000,227.462434)}
{pt3dadd(176904.000000,178980.000000,66525.000000,219.952992)}
{pt3dadd(176976.000000,178692.000000,66350.000000,216.015222)}
{pt3dadd(176700.000000,178776.000000,66175.000000,251.868836)}
{pt3dadd(176184.000000,179256.000000,66050.000000,290.759790)}
{pt3dadd(176040.000000,179148.000000,65950.000000,283.688122)}
{pt3dadd(175764.000000,179220.000000,65750.000000,297.873774)}
{pt3dadd(175248.000000,179184.000000,65500.000000,310.939320)}
{pt3dadd(174648.000000,179112.000000,65275.000000,287.529080)}
{pt3dadd(174384.000000,179160.000000,65100.000000,270.020004)}
{pt3dadd(174072.000000,179112.000000,64975.000000,250.059362)}
{pt3dadd(173748.000000,179112.000000,64775.000000,239.445382)}
{pt3dadd(173448.000000,179076.000000,64650.000000,236.993816)}
{pt3dadd(173208.000000,179040.000000,64525.000000,236.993816)}
{pt3dadd(172920.000000,179040.000000,64425.000000,248.088684)}
{pt3dadd(172488.000000,179052.000000,64225.000000,248.088684)}
{pt3dadd(172212.000000,179064.000000,64100.000000,261.154230)}
{pt3dadd(172140.000000,179124.000000,63975.000000,256.595772)}
{pt3dadd(172008.000000,179064.000000,63825.000000,240.750806)}
{pt3dadd(171732.000000,179064.000000,63675.000000,213.018720)}
{pt3dadd(171420.000000,179064.000000,63425.000000,202.404740)}
{pt3dadd(170928.000000,179064.000000,63075.000000,189.339194)}
{pt3dadd(170472.000000,179016.000000,62750.000000,191.562832)}
{pt3dadd(170160.000000,178908.000000,62450.000000,205.072978)}
{pt3dadd(170004.000000,178800.000000,62250.000000,242.668870)}
{pt3dadd(169824.000000,178824.000000,62100.000000,273.243492)}
{pt3dadd(169524.000000,178776.000000,61975.000000,281.522652)}
{pt3dadd(169380.000000,178740.000000,61825.000000,297.403906)}
{pt3dadd(169116.000000,178740.000000,61675.000000,307.467276)}
{pt3dadd(168852.000000,178704.000000,61525.000000,277.380826)}
{pt3dadd(168576.000000,178656.000000,61375.000000,270.966618)}
{pt3dadd(168276.000000,178632.000000,61250.000000,273.301438)}
{pt3dadd(167964.000000,178608.000000,61050.000000,255.196546)}
{pt3dadd(167556.000000,178524.000000,60900.000000,227.104304)}
{pt3dadd(167220.000000,178536.000000,60750.000000,217.935548)}
{pt3dadd(166980.000000,178560.000000,60600.000000,185.458802)}
{pt3dadd(166656.000000,178584.000000,60475.000000,173.015428)}
{pt3dadd(166140.000000,178584.000000,60275.000000,163.388234)}
{pt3dadd(165624.000000,178584.000000,60200.000000,173.137946)}
{pt3dadd(165312.000000,178584.000000,60125.000000,171.557644)}
{pt3dadd(165096.000000,178740.000000,60000.000000,178.044582)}
{pt3dadd(164736.000000,178740.000000,59850.000000,170.124264)}
{pt3dadd(164544.000000,178692.000000,59800.000000,165.379604)}
{pt3dadd(164316.000000,178764.000000,59850.000000,152.964654)}
{pt3dadd(164100.000000,178764.000000,59700.000000,137.321843)}
{pt3dadd(163920.000000,178716.000000,59550.000000,121.107467)}
{pt3dadd(163644.000000,178716.000000,59400.000000,118.442229)}
{pt3dadd(163308.000000,178716.000000,59325.000000,123.186889)}
{pt3dadd(163092.000000,178716.000000,59200.000000,121.948685)}
{pt3dadd(162924.000000,178692.000000,59050.000000,133.287950)}
{pt3dadd(162780.000000,178752.000000,58950.000000,136.499322)}
{pt3dadd(162396.000000,179016.000000,58775.000000,130.870502)}
{pt3dadd(162132.000000,179016.000000,58575.000000,120.789020)}
{pt3dadd(161832.000000,179016.000000,58350.000000,126.125842)}
{pt3dadd(161712.000000,179016.000000,58100.000000,124.825726)}
{pt3dadd(161580.000000,179004.000000,57800.000000,137.828730)}
{pt3dadd(161460.000000,178968.000000,57650.000000,154.043106)}
{pt3dadd(161424.000000,178968.000000,57250.000000,155.281310)}
{pt3dadd(161388.000000,179016.000000,57100.000000,145.553872)}
{pt3dadd(161256.000000,179016.000000,56900.000000,138.272807)}
{pt3dadd(161256.000000,179016.000000,56675.000000,101.867480)}

{create adhoc30}
{access adhoc30}
{connect adhoc30(1), adhoc28(0)}
{nseg = 1}
{strdef color color = "White"}
{pt3dclear()}
{pt3dadd(183288.000000,176580.000000,80475.000000,328.532800)}
{pt3dadd(183348.000000,176352.000000,80400.000000,360.562193)}
{pt3dadd(183444.000000,176004.000000,80550.000000,313.435240)}
{pt3dadd(183444.000000,175716.000000,80425.000000,299.211492)}
{pt3dadd(183444.000000,175428.000000,80275.000000,251.496544)}
{pt3dadd(183444.000000,175140.000000,80100.000000,233.391652)}
{pt3dadd(183444.000000,174876.000000,79875.000000,225.663102)}
{pt3dadd(183444.000000,174732.000000,79725.000000,218.511254)}
{pt3dadd(183444.000000,174552.000000,79650.000000,207.366570)}
{pt3dadd(183504.000000,174408.000000,79525.000000,207.366570)}
{pt3dadd(183504.000000,174288.000000,79425.000000,203.231910)}
{pt3dadd(183528.000000,174192.000000,79250.000000,216.778344)}
{pt3dadd(183528.000000,174000.000000,79050.000000,228.064852)}
{pt3dadd(183528.000000,173772.000000,78825.000000,232.199512)}
{pt3dadd(183528.000000,173568.000000,78475.000000,243.344196)}
{pt3dadd(183528.000000,173364.000000,78125.000000,247.478856)}
{pt3dadd(183528.000000,173160.000000,77775.000000,241.660972)}
{pt3dadd(183528.000000,173064.000000,77575.000000,243.884610)}
{pt3dadd(183504.000000,172968.000000,77425.000000,261.989502)}
{pt3dadd(183456.000000,172860.000000,77275.000000,276.213250)}
{pt3dadd(183516.000000,172584.000000,77050.000000,307.804018)}
{pt3dadd(183564.000000,172464.000000,76850.000000,316.750782)}
{pt3dadd(183648.000000,172332.000000,76600.000000,332.632036)}
{pt3dadd(183648.000000,172236.000000,76400.000000,332.632036)}
{pt3dadd(184044.000000,172092.000000,76175.000000,339.366962)}
{pt3dadd(184272.000000,171888.000000,75950.000000,329.009966)}
{pt3dadd(184236.000000,171516.000000,75650.000000,329.009966)}
{pt3dadd(184296.000000,171192.000000,75475.000000,310.905074)}
{pt3dadd(184296.000000,170904.000000,75325.000000,305.087190)}
{pt3dadd(184296.000000,170664.000000,75100.000000,301.637592)}
{pt3dadd(184296.000000,170424.000000,74900.000000,301.637592)}
{pt3dadd(184296.000000,170232.000000,74625.000000,289.987984)}
{pt3dadd(184308.000000,170040.000000,74300.000000,294.546442)}
{pt3dadd(184308.000000,169788.000000,73825.000000,274.374518)}
{pt3dadd(184308.000000,169548.000000,73450.000000,262.142426)}
{pt3dadd(184308.000000,169272.000000,73100.000000,243.132292)}
{pt3dadd(184308.000000,168996.000000,72775.000000,245.835136)}
{pt3dadd(184308.000000,168720.000000,72450.000000,265.795778)}
{pt3dadd(184308.000000,168456.000000,72250.000000,267.625172)}
{pt3dadd(184308.000000,168228.000000,71900.000000,262.348188)}
{pt3dadd(184188.000000,167988.000000,71650.000000,267.134574)}
{pt3dadd(184104.000000,167952.000000,71500.000000,250.712906)}
{pt3dadd(184056.000000,167796.000000,71375.000000,214.907298)}
{pt3dadd(183960.000000,167712.000000,71250.000000,205.157586)}
{pt3dadd(183912.000000,167688.000000,71125.000000,194.012902)}
{pt3dadd(183816.000000,167676.000000,71025.000000,189.226516)}
{pt3dadd(183720.000000,167580.000000,70900.000000,187.305654)}
{pt3dadd(183660.000000,167544.000000,70775.000000,205.602186)}
{pt3dadd(183648.000000,167580.000000,70675.000000,223.631058)}
{pt3dadd(183600.000000,167484.000000,70525.000000,227.765718)}
{pt3dadd(183528.000000,167364.000000,70400.000000,235.126244)}
{pt3dadd(183456.000000,167364.000000,70250.000000,250.765930)}
{pt3dadd(183408.000000,167316.000000,70150.000000,264.989678)}
{pt3dadd(183264.000000,167268.000000,70050.000000,290.734738)}
{pt3dadd(183144.000000,167184.000000,69925.000000,326.128686)}
{pt3dadd(183024.000000,167064.000000,69775.000000,355.931804)}
{pt3dadd(183000.000000,166980.000000,69625.000000,377.938408)}
{pt3dadd(182928.000000,166992.000000,69525.000000,374.809528)}
{pt3dadd(182904.000000,166944.000000,69400.000000,359.127838)}
{pt3dadd(182916.000000,166848.000000,69300.000000,336.020898)}
{pt3dadd(182808.000000,166788.000000,69175.000000,290.578094)}
{pt3dadd(182580.000000,166692.000000,68900.000000,265.997350)}
{pt3dadd(182364.000000,166524.000000,68650.000000,254.902482)}
{pt3dadd(182244.000000,166440.000000,68525.000000,274.206242)}
{pt3dadd(182220.000000,166380.000000,68400.000000,280.024126)}
{pt3dadd(182208.000000,166164.000000,68250.000000,314.048346)}
{pt3dadd(182148.000000,165948.000000,68100.000000,335.007020)}
{pt3dadd(182016.000000,165756.000000,67950.000000,349.230768)}
{pt3dadd(181992.000000,165492.000000,67800.000000,332.765002)}
{pt3dadd(181908.000000,165348.000000,67650.000000,362.643054)}
{pt3dadd(181920.000000,165264.000000,67525.000000,378.254644)}
{pt3dadd(181836.000000,165036.000000,67400.000000,402.891674)}
{pt3dadd(181704.000000,164724.000000,67275.000000,417.051850)}
{pt3dadd(181572.000000,164436.000000,66950.000000,429.895546)}
{pt3dadd(181392.000000,164112.000000,66800.000000,413.503370)}
{pt3dadd(181308.000000,163980.000000,66650.000000,372.146720)}
{pt3dadd(181284.000000,163656.000000,66550.000000,317.423240)}
{pt3dadd(180984.000000,163380.000000,66325.000000,274.144376)}
{pt3dadd(180852.000000,162744.000000,66200.000000,248.399316)}
{pt3dadd(180480.000000,162504.000000,65975.000000,221.367006)}
{pt3dadd(180360.000000,162348.000000,65850.000000,215.008708)}
{pt3dadd(180096.000000,161784.000000,65725.000000,241.645560)}
{pt3dadd(179988.000000,161604.000000,65600.000000,259.114640)}
{pt3dadd(179772.000000,161436.000000,65475.000000,274.995894)}
{pt3dadd(179652.000000,161352.000000,65350.000000,272.661074)}
{pt3dadd(179472.000000,161160.000000,65225.000000,294.900626)}
{pt3dadd(179244.000000,160932.000000,65100.000000,266.246866)}
{pt3dadd(179100.000000,160740.000000,64975.000000,261.221160)}
{pt3dadd(179004.000000,160560.000000,64850.000000,230.249458)}
{pt3dadd(178884.000000,160380.000000,64725.000000,212.220586)}
{pt3dadd(178788.000000,160200.000000,64650.000000,178.310460)}
{pt3dadd(178656.000000,160068.000000,64525.000000,182.445120)}
{pt3dadd(178584.000000,160008.000000,64375.000000,182.445120)}
{pt3dadd(178488.000000,159840.000000,64275.000000,210.436932)}
{pt3dadd(178164.000000,159588.000000,64075.000000,250.761266)}
{pt3dadd(177984.000000,159420.000000,63925.000000,298.157268)}
{pt3dadd(177780.000000,159216.000000,63750.000000,313.282270)}
{pt3dadd(177696.000000,158952.000000,63600.000000,313.282270)}
{pt3dadd(177492.000000,158796.000000,63425.000000,316.262160)}
{pt3dadd(177336.000000,158472.000000,63250.000000,304.030068)}
{pt3dadd(177228.000000,158208.000000,63100.000000,284.726308)}
{pt3dadd(177132.000000,158028.000000,62950.000000,269.601306)}
{pt3dadd(177108.000000,157836.000000,62775.000000,277.329856)}
{pt3dadd(177084.000000,157428.000000,62625.000000,294.618912)}
{pt3dadd(176964.000000,157212.000000,62475.000000,276.276382)}
{pt3dadd(176964.000000,157176.000000,62325.000000,246.819018)}
{pt3dadd(176748.000000,156984.000000,62150.000000,232.447164)}
{pt3dadd(176748.000000,156756.000000,61825.000000,232.447164)}
{pt3dadd(176748.000000,156612.000000,61575.000000,185.766708)}
{pt3dadd(176496.000000,156720.000000,61350.000000,176.016996)}
{pt3dadd(176460.000000,156672.000000,61100.000000,178.815498)}
{pt3dadd(176460.000000,156600.000000,60900.000000,171.176344)}
{pt3dadd(176460.000000,156468.000000,60725.000000,141.718980)}
{pt3dadd(176460.000000,156336.000000,60575.000000,134.535016)}
{pt3dadd(176460.000000,156180.000000,60300.000000,134.535016)}
{pt3dadd(176460.000000,155952.000000,60125.000000,130.436398)}
{pt3dadd(176496.000000,155760.000000,60025.000000,136.642172)}
{pt3dadd(176496.000000,155496.000000,59850.000000,139.440674)}
{pt3dadd(176496.000000,155208.000000,59700.000000,139.440674)}
{pt3dadd(176496.000000,154872.000000,59500.000000,138.075552)}
{pt3dadd(176496.000000,154680.000000,59300.000000,145.259516)}
{pt3dadd(176364.000000,154536.000000,59125.000000,153.179834)}
{pt3dadd(176172.000000,154428.000000,58875.000000,165.433936)}
{pt3dadd(176052.000000,154344.000000,58850.000000,169.532554)}
{pt3dadd(176004.000000,154272.000000,58875.000000,166.994234)}
{pt3dadd(175860.000000,154188.000000,58825.000000,158.572066)}
{pt3dadd(175740.000000,154128.000000,58800.000000,150.651748)}
{pt3dadd(175668.000000,154056.000000,58775.000000,133.060824)}
{pt3dadd(175596.000000,153984.000000,58650.000000,131.627444)}
{pt3dadd(175524.000000,153912.000000,58575.000000,130.448200)}
{pt3dadd(175344.000000,153804.000000,58350.000000,127.076258)}
{pt3dadd(175260.000000,153732.000000,58150.000000,118.782200)}
{pt3dadd(175140.000000,153648.000000,58000.000000,114.391584)}
{pt3dadd(175176.000000,153612.000000,57850.000000,107.116200)}
{pt3dadd(175164.000000,153552.000000,57700.000000,98.734348)}
{pt3dadd(175164.000000,153324.000000,57600.000000,91.131762)}
{pt3dadd(175176.000000,153372.000000,57450.000000,83.974617)}
{pt3dadd(175140.000000,153396.000000,57375.000000,68.947920)}

{create adhoc31}
{access adhoc31}
{connect adhoc31(1), adhoc27(0)}
{nseg = 1}
{strdef color color = "White"}
{pt3dclear()}
{pt3dadd(190728.000000,188172.000000,99750.000000,509.662200)}
{pt3dadd(190464.000000,188184.000000,99600.000000,373.513183)}
{pt3dadd(190116.000000,188400.000000,99525.000000,326.060736)}
{pt3dadd(189996.000000,188448.000000,99350.000000,264.466424)}
{pt3dadd(189732.000000,188448.000000,99125.000000,258.925586)}
{pt3dadd(189564.000000,188448.000000,98800.000000,238.702942)}
{pt3dadd(189324.000000,188484.000000,98475.000000,215.693024)}
{pt3dadd(189096.000000,188484.000000,98150.000000,235.915668)}
{pt3dadd(188976.000000,188484.000000,97700.000000,244.608786)}
{pt3dadd(188664.000000,189024.000000,97525.000000,239.583080)}
{pt3dadd(188532.000000,189192.000000,97325.000000,253.987840)}
{pt3dadd(188400.000000,189312.000000,97200.000000,261.872756)}
{pt3dadd(188208.000000,189504.000000,97050.000000,241.650112)}
{pt3dadd(188076.000000,189660.000000,96900.000000,222.719800)}
{pt3dadd(187932.000000,189792.000000,96650.000000,233.286344)}
{pt3dadd(187668.000000,190068.000000,96525.000000,213.114420)}
{pt3dadd(187428.000000,190344.000000,96300.000000,225.401428)}
{pt3dadd(187212.000000,190644.000000,96175.000000,248.752952)}
{pt3dadd(186972.000000,190860.000000,96000.000000,275.411814)}
{pt3dadd(186744.000000,190944.000000,95875.000000,269.870976)}
{pt3dadd(186648.000000,190992.000000,95750.000000,287.340056)}
{pt3dadd(186588.000000,191016.000000,95625.000000,282.063072)}
{pt3dadd(186504.000000,191064.000000,95500.000000,270.413464)}
{pt3dadd(186360.000000,191088.000000,95375.000000,260.350094)}
{pt3dadd(186312.000000,191100.000000,95100.000000,268.870822)}
{pt3dadd(186252.000000,191136.000000,94975.000000,268.870822)}
{pt3dadd(186180.000000,191172.000000,94825.000000,259.743046)}
{pt3dadd(186168.000000,191160.000000,94700.000000,257.168906)}
{pt3dadd(186072.000000,191184.000000,94525.000000,267.232276)}
{pt3dadd(185976.000000,191220.000000,94400.000000,258.711548)}
{pt3dadd(185952.000000,191256.000000,94250.000000,256.137408)}
{pt3dadd(185904.000000,191280.000000,94075.000000,258.255160)}
{pt3dadd(185844.000000,191316.000000,93925.000000,258.255160)}
{pt3dadd(185772.000000,191376.000000,93775.000000,245.968152)}
{pt3dadd(185736.000000,191388.000000,93650.000000,245.968152)}
{pt3dadd(185736.000000,191400.000000,93525.000000,243.516586)}
{pt3dadd(185748.000000,191412.000000,93375.000000,248.075044)}
{pt3dadd(185772.000000,191400.000000,93225.000000,256.190022)}
{pt3dadd(185712.000000,191424.000000,93075.000000,265.774186)}
{pt3dadd(185700.000000,191472.000000,92925.000000,248.305106)}
{pt3dadd(185628.000000,191544.000000,92775.000000,237.691126)}
{pt3dadd(185556.000000,191700.000000,92575.000000,233.132668)}
{pt3dadd(185580.000000,191796.000000,92450.000000,227.591830)}
{pt3dadd(185604.000000,191808.000000,92300.000000,213.873006)}
{pt3dadd(185484.000000,191880.000000,92150.000000,242.991694)}
{pt3dadd(185460.000000,191916.000000,92000.000000,277.015914)}
{pt3dadd(185460.000000,192144.000000,91775.000000,301.535014)}
{pt3dadd(185280.000000,192288.000000,91525.000000,304.237858)}
{pt3dadd(185064.000000,192648.000000,91350.000000,315.382542)}
{pt3dadd(184872.000000,193176.000000,91325.000000,290.014110)}
{pt3dadd(184692.000000,193632.000000,91250.000000,249.178602)}
{pt3dadd(184500.000000,193980.000000,91150.000000,211.792692)}
{pt3dadd(184212.000000,194328.000000,91075.000000,199.505684)}
{pt3dadd(184020.000000,194604.000000,90975.000000,186.440138)}
{pt3dadd(183756.000000,194976.000000,90700.000000,195.133256)}
{pt3dadd(183540.000000,195336.000000,90600.000000,215.010090)}
{pt3dadd(183420.000000,195588.000000,90475.000000,234.886924)}
{pt3dadd(183240.000000,195924.000000,90475.000000,262.855622)}
{pt3dadd(183144.000000,196428.000000,90400.000000,271.134782)}
{pt3dadd(183024.000000,196992.000000,90300.000000,268.799962)}
{pt3dadd(182928.000000,197460.000000,90200.000000,259.672186)}
{pt3dadd(182904.000000,197472.000000,90075.000000,259.672186)}
{pt3dadd(182868.000000,197784.000000,89975.000000,238.713512)}
{pt3dadd(182880.000000,198024.000000,89700.000000,254.594766)}
{pt3dadd(182892.000000,198288.000000,89575.000000,259.381152)}
{pt3dadd(182748.000000,198660.000000,89450.000000,245.693670)}
{pt3dadd(182580.000000,199032.000000,89350.000000,236.565894)}
{pt3dadd(182472.000000,199404.000000,89275.000000,241.842878)}
{pt3dadd(182292.000000,199716.000000,89275.000000,255.328754)}
{pt3dadd(182112.000000,200028.000000,89175.000000,269.552502)}
{pt3dadd(181860.000000,200376.000000,89050.000000,292.367760)}
{pt3dadd(181680.000000,200652.000000,88850.000000,292.367760)}
{pt3dadd(181548.000000,200760.000000,88725.000000,280.080752)}
{pt3dadd(181416.000000,200820.000000,88500.000000,248.489984)}
{pt3dadd(181104.000000,200808.000000,88275.000000,219.371296)}
{pt3dadd(180972.000000,200904.000000,88075.000000,219.371296)}
{pt3dadd(180804.000000,200928.000000,87825.000000,242.722820)}
{pt3dadd(180516.000000,201000.000000,87575.000000,255.009828)}
{pt3dadd(180348.000000,201084.000000,87425.000000,259.568286)}
{pt3dadd(180216.000000,201168.000000,87300.000000,254.586392)}
{pt3dadd(180108.000000,201264.000000,87175.000000,241.520846)}
{pt3dadd(180012.000000,201372.000000,87075.000000,220.287074)}
{pt3dadd(179940.000000,201480.000000,86950.000000,196.713558)}
{pt3dadd(179904.000000,201384.000000,86775.000000,174.984744)}
{pt3dadd(179760.000000,201624.000000,86675.000000,183.716894)}
{pt3dadd(179700.000000,201756.000000,86575.000000,187.654664)}
{pt3dadd(179532.000000,201864.000000,86450.000000,185.536912)}
{pt3dadd(179448.000000,201996.000000,86325.000000,190.767898)}
{pt3dadd(179352.000000,202068.000000,86200.000000,210.161892)}
{pt3dadd(179292.000000,202224.000000,86075.000000,214.296552)}
{pt3dadd(179232.000000,202428.000000,85975.000000,206.787110)}
{pt3dadd(179136.000000,202560.000000,85850.000000,236.873560)}
{pt3dadd(179052.000000,202704.000000,85725.000000,252.513246)}
{pt3dadd(178800.000000,203064.000000,85550.000000,237.422798)}
{pt3dadd(178476.000000,203376.000000,85475.000000,213.323506)}
{pt3dadd(178200.000000,203688.000000,85475.000000,211.664192)}
{pt3dadd(177888.000000,203988.000000,85475.000000,165.225022)}
{pt3dadd(177552.000000,204252.000000,85475.000000,144.354350)}
{pt3dadd(177216.000000,204528.000000,85475.000000,144.354350)}
{pt3dadd(176880.000000,204852.000000,85400.000000,158.826448)}
{pt3dadd(176472.000000,205164.000000,85400.000000,149.225036)}
{pt3dadd(176160.000000,205380.000000,85325.000000,149.225036)}
{pt3dadd(175932.000000,205656.000000,85250.000000,137.430926)}
{pt3dadd(175716.000000,205920.000000,85200.000000,123.424340)}
{pt3dadd(175476.000000,206184.000000,85200.000000,121.765026)}
{pt3dadd(175284.000000,206388.000000,85200.000000,126.847712)}
{pt3dadd(175092.000000,206460.000000,85025.000000,135.690990)}
{pt3dadd(175008.000000,206676.000000,84925.000000,154.636948)}
{pt3dadd(174840.000000,206808.000000,84800.000000,183.733982)}
{pt3dadd(174840.000000,206700.000000,84675.000000,190.885830)}
{pt3dadd(174708.000000,206844.000000,84550.000000,198.806148)}
{pt3dadd(174552.000000,206904.000000,84425.000000,240.024110)}
{pt3dadd(174336.000000,206976.000000,84300.000000,256.445778)}
{pt3dadd(174192.000000,207444.000000,84050.000000,258.780598)}
{pt3dadd(174060.000000,207492.000000,83925.000000,260.797506)}
{pt3dadd(173940.000000,207528.000000,83775.000000,262.626900)}
{pt3dadd(173772.000000,207564.000000,83650.000000,235.594590)}
{pt3dadd(173328.000000,207876.000000,83450.000000,223.307582)}
{pt3dadd(173160.000000,207984.000000,83300.000000,214.614464)}
{pt3dadd(173040.000000,208068.000000,83150.000000,223.742240)}
{pt3dadd(172956.000000,208116.000000,83025.000000,244.922764)}
{pt3dadd(172572.000000,208332.000000,82875.000000,258.469198)}
{pt3dadd(172392.000000,208368.000000,82725.000000,273.594200)}
{pt3dadd(172320.000000,208284.000000,82475.000000,284.738884)}
{pt3dadd(172248.000000,208284.000000,82325.000000,261.923626)}
{pt3dadd(172164.000000,208284.000000,82200.000000,232.913593)}
{pt3dadd(172152.000000,208356.000000,81950.000000,143.337770)}
