# Supplementary material for: Full reconstruction of large lobula plate tangential cells in Drosophila from a 3D EM dataset
Source: PLoS One. 2018 Nov 28;13(11):e0207828. doi: 10.1371/journal.pone.0207828 (PMC6261601; doi:10.1371/journal.pone.0207828)
Supplement: S1 Dataset — (ZIP) [file pone.0207828.s001.zip › Diameter hoc/ZELLE_22.hoc0001.hoc]

/* created with convertKnossosNmlToHoc.m */

{create adhoc1}
{access adhoc1}
{nseg = 1}
{strdef color color = "White"}
{pt3dclear()}
{pt3dadd(172908.000000,161136.000000,49150.000000,160.811480)}
{pt3dadd(172800.000000,160932.000000,49500.000000,144.224077)}
{pt3dadd(172944.000000,160848.000000,50050.000000,154.155672)}
{pt3dadd(173280.000000,160428.000000,50250.000000,152.624136)}
{pt3dadd(173232.000000,160320.000000,50375.000000,149.192844)}
{pt3dadd(173244.000000,159864.000000,50675.000000,144.020694)}
{pt3dadd(172872.000000,159756.000000,50875.000000,128.306624)}
{pt3dadd(172272.000000,159468.000000,51275.000000,125.316478)}
{pt3dadd(171768.000000,158892.000000,51500.000000,117.542860)}
{pt3dadd(171372.000000,158520.000000,51600.000000,120.974152)}
{pt3dadd(171132.000000,158232.000000,51700.000000,134.206032)}
{pt3dadd(170808.000000,157860.000000,51825.000000,142.148370)}
{pt3dadd(170460.000000,157236.000000,52025.000000,186.159400)}

{create adhoc2}
{access adhoc2}
{connect adhoc2(1), adhoc1(0)}
{nseg = 1}
{strdef color color = "White"}
{pt3dclear()}
{pt3dadd(170460.000000,157236.000000,52025.000000,186.159400)}
{pt3dadd(170412.000000,157224.000000,52150.000000,202.300960)}
{pt3dadd(170328.000000,157236.000000,52300.000000,184.323136)}
{pt3dadd(170220.000000,157068.000000,52500.000000,169.948398)}
{pt3dadd(170136.000000,157008.000000,52625.000000,153.307846)}
{pt3dadd(170088.000000,157008.000000,52725.000000,136.259702)}
{pt3dadd(170052.000000,157008.000000,52850.000000,128.949292)}
{pt3dadd(170004.000000,156912.000000,52950.000000,135.236072)}
{pt3dadd(169800.000000,156948.000000,53075.000000,155.479482)}
{pt3dadd(169812.000000,156936.000000,53175.000000,155.479482)}
{pt3dadd(169788.000000,157020.000000,53300.000000,165.249892)}
{pt3dadd(169584.000000,156780.000000,53500.000000,177.883364)}
{pt3dadd(169536.000000,156780.000000,53775.000000,181.517906)}
{pt3dadd(169572.000000,156528.000000,54050.000000,169.048114)}
{pt3dadd(169584.000000,156492.000000,54175.000000,197.596554)}
{pt3dadd(169608.000000,156384.000000,54275.000000,211.344504)}
{pt3dadd(169632.000000,156396.000000,54400.000000,219.769392)}
{pt3dadd(169692.000000,156264.000000,54500.000000,214.446330)}
{pt3dadd(169812.000000,156324.000000,54625.000000,205.584278)}
{pt3dadd(169920.000000,156432.000000,54825.000000,182.738134)}
{pt3dadd(169896.000000,156216.000000,55025.000000,165.850534)}
{pt3dadd(170124.000000,156348.000000,55250.000000,163.587754)}
{pt3dadd(170256.000000,156312.000000,55375.000000,172.917896)}
{pt3dadd(170460.000000,156348.000000,55475.000000,214.828332)}
{pt3dadd(170652.000000,156252.000000,55600.000000,230.184396)}
{pt3dadd(170796.000000,156096.000000,55800.000000,254.562076)}
{pt3dadd(171024.000000,156420.000000,55925.000000,246.538376)}
{pt3dadd(171000.000000,156324.000000,56050.000000,242.531296)}
{pt3dadd(171228.000000,156432.000000,56175.000000,214.311082)}
{pt3dadd(171468.000000,156420.000000,56275.000000,204.024602)}
{pt3dadd(171576.000000,156396.000000,56400.000000,182.786572)}
{pt3dadd(171684.000000,156504.000000,56575.000000,176.185452)}
{pt3dadd(171708.000000,156468.000000,56675.000000,166.264130)}
{pt3dadd(171828.000000,156528.000000,56775.000000,166.264130)}
{pt3dadd(171960.000000,156456.000000,56900.000000,161.194546)}
{pt3dadd(172260.000000,156516.000000,57075.000000,158.054896)}
{pt3dadd(172416.000000,156600.000000,57175.000000,166.517608)}
{pt3dadd(172404.000000,156504.000000,57350.000000,180.446010)}
{pt3dadd(172536.000000,156552.000000,57450.000000,190.242660)}
{pt3dadd(172668.000000,156612.000000,57550.000000,191.850774)}
{pt3dadd(172908.000000,156540.000000,57675.000000,204.320566)}
{pt3dadd(173124.000000,156564.000000,57850.000000,220.235534)}
{pt3dadd(173232.000000,156456.000000,57925.000000,237.781782)}
{pt3dadd(173376.000000,156300.000000,58125.000000,240.044562)}
{pt3dadd(173652.000000,156456.000000,58225.000000,247.322296)}
{pt3dadd(173772.000000,156360.000000,58350.000000,234.852504)}
{pt3dadd(173904.000000,156360.000000,58450.000000,210.474824)}
{pt3dadd(174036.000000,156432.000000,58550.000000,183.598434)}
{pt3dadd(174144.000000,156408.000000,58675.000000,162.540074)}
{pt3dadd(174396.000000,156432.000000,58775.000000,147.951930)}
{pt3dadd(174600.000000,156336.000000,58875.000000,143.781170)}
{pt3dadd(174852.000000,156420.000000,58975.000000,134.919118)}
{pt3dadd(174996.000000,156516.000000,59075.000000,124.005850)}
{pt3dadd(175128.000000,156492.000000,59200.000000,120.402992)}
{pt3dadd(175296.000000,156624.000000,59300.000000,120.402992)}
{pt3dadd(175344.000000,156516.000000,59375.000000,121.725992)}
{pt3dadd(175488.000000,156588.000000,59500.000000,135.416214)}
{pt3dadd(175464.000000,156372.000000,59650.000000,148.018002)}
{pt3dadd(175596.000000,156480.000000,59775.000000,162.392740)}
{pt3dadd(175752.000000,156588.000000,59900.000000,175.026212)}
{pt3dadd(175740.000000,156624.000000,60025.000000,205.002072)}
{pt3dadd(175788.000000,156552.000000,60150.000000,223.473687)}
{pt3dadd(176088.000000,156312.000000,60375.000000,288.794300)}

{create adhoc3}
{access adhoc3}
{connect adhoc3(1), adhoc2(0)}
{nseg = 1}
{strdef color color = "White"}
{pt3dclear()}
{pt3dadd(176088.000000,156312.000000,60375.000000,288.794300)}
{pt3dadd(176340.000000,156372.000000,60475.000000,281.593940)}
{pt3dadd(176244.000000,156384.000000,60600.000000,268.744912)}
{pt3dadd(176280.000000,156612.000000,60725.000000,250.079524)}
{pt3dadd(176304.000000,156492.000000,60825.000000,223.632260)}
{pt3dadd(176316.000000,156636.000000,60950.000000,221.369480)}
{pt3dadd(176256.000000,156756.000000,61075.000000,226.483646)}
{pt3dadd(176268.000000,156804.000000,61200.000000,231.597812)}
{pt3dadd(176412.000000,156876.000000,61325.000000,237.759920)}
{pt3dadd(176400.000000,156864.000000,61425.000000,248.046400)}
{pt3dadd(176388.000000,156780.000000,61550.000000,255.179810)}
{pt3dadd(176532.000000,156912.000000,61700.000000,255.179810)}
{pt3dadd(176580.000000,156912.000000,61800.000000,255.179810)}
{pt3dadd(176604.000000,156864.000000,61925.000000,257.442590)}
{pt3dadd(176664.000000,156984.000000,62050.000000,257.442590)}
{pt3dadd(176712.000000,157116.000000,62150.000000,268.732744)}
{pt3dadd(176796.000000,157176.000000,62275.000000,271.483164)}
{pt3dadd(176892.000000,157236.000000,62400.000000,268.863714)}
{pt3dadd(176856.000000,157464.000000,62575.000000,264.445906)}
{pt3dadd(176988.000000,157584.000000,62700.000000,266.821820)}
{pt3dadd(177000.000000,157932.000000,62875.000000,258.151116)}
{pt3dadd(177204.000000,158208.000000,63000.000000,247.910616)}
{pt3dadd(177216.000000,158328.000000,63125.000000,245.415900)}
{pt3dadd(177348.000000,158544.000000,63250.000000,249.833708)}
{pt3dadd(177528.000000,158808.000000,63375.000000,252.328424)}
{pt3dadd(177576.000000,158952.000000,63500.000000,255.078844)}
{pt3dadd(177696.000000,159156.000000,63625.000000,262.568924)}
{pt3dadd(177900.000000,159324.000000,63725.000000,265.063640)}
{pt3dadd(177972.000000,159348.000000,63850.000000,260.645832)}
{pt3dadd(178032.000000,159516.000000,63950.000000,247.350314)}
{pt3dadd(178176.000000,159564.000000,64075.000000,226.823334)}
{pt3dadd(178320.000000,159732.000000,64175.000000,207.273824)}
{pt3dadd(178608.000000,159864.000000,64275.000000,188.655244)}
{pt3dadd(178608.000000,159924.000000,64400.000000,184.648164)}
{pt3dadd(178752.000000,160068.000000,64525.000000,181.013622)}
{pt3dadd(178836.000000,160236.000000,64650.000000,193.676016)}
{pt3dadd(178944.000000,160512.000000,64750.000000,191.987496)}
{pt3dadd(179088.000000,160716.000000,64850.000000,201.317638)}
{pt3dadd(179232.000000,160872.000000,64975.000000,222.870966)}
{pt3dadd(179244.000000,160884.000000,65100.000000,232.667616)}
{pt3dadd(179460.000000,161244.000000,65200.000000,235.162332)}
{pt3dadd(179484.000000,161220.000000,65325.000000,271.598178)}
{pt3dadd(179784.000000,161352.000000,65450.000000,305.900026)}
{pt3dadd(179904.000000,161652.000000,65575.000000,312.116330)}
{pt3dadd(180000.000000,161904.000000,65675.000000,327.507550)}
{pt3dadd(180192.000000,162120.000000,65800.000000,352.520960)}
{pt3dadd(180420.000000,162360.000000,65925.000000,349.177808)}
{pt3dadd(180972.000000,162720.000000,66125.000000,324.164398)}
{pt3dadd(181176.000000,163380.000000,66250.000000,342.637440)}
{pt3dadd(181284.000000,163536.000000,66375.000000,371.593594)}
{pt3dadd(181344.000000,163704.000000,66475.000000,383.794148)}
{pt3dadd(181308.000000,163848.000000,66600.000000,420.657656)}
{pt3dadd(181404.000000,163968.000000,66725.000000,462.351766)}
{pt3dadd(181572.000000,164196.000000,66825.000000,454.418020)}
{pt3dadd(181608.000000,164472.000000,66925.000000,428.494210)}
{pt3dadd(181716.000000,164616.000000,67125.000000,399.538056)}
{pt3dadd(181788.000000,164856.000000,67225.000000,362.674548)}
{pt3dadd(181884.000000,165084.000000,67350.000000,326.350308)}
{pt3dadd(181848.000000,165204.000000,67450.000000,315.811012)}
{pt3dadd(181896.000000,165288.000000,67575.000000,312.778668)}
{pt3dadd(181908.000000,165480.000000,67675.000000,307.140308)}
{pt3dadd(181920.000000,165588.000000,67800.000000,298.036064)}
{pt3dadd(182016.000000,165780.000000,67875.000000,298.036064)}
{pt3dadd(182160.000000,165912.000000,68000.000000,281.067234)}
{pt3dadd(182124.000000,165972.000000,68100.000000,265.676014)}
{pt3dadd(182136.000000,166152.000000,68225.000000,251.715718)}
{pt3dadd(182112.000000,166380.000000,68400.000000,248.965298)}
{pt3dadd(182220.000000,166476.000000,68525.000000,238.724798)}
{pt3dadd(182184.000000,166284.000000,68625.000000,238.724798)}
{pt3dadd(182436.000000,166668.000000,68750.000000,248.477658)}
{pt3dadd(182580.000000,166596.000000,68875.000000,262.437954)}
{pt3dadd(182808.000000,166716.000000,69000.000000,254.947874)}
{pt3dadd(182784.000000,166668.000000,69100.000000,265.188374)}
{pt3dadd(182820.000000,166764.000000,69225.000000,285.500356)}
{pt3dadd(182772.000000,166812.000000,69350.000000,291.138716)}
{pt3dadd(182928.000000,166836.000000,69475.000000,286.024550)}
{pt3dadd(182952.000000,166812.000000,69600.000000,288.400464)}
{pt3dadd(183060.000000,166884.000000,69700.000000,278.159964)}
{pt3dadd(183228.000000,167076.000000,69825.000000,255.472068)}
{pt3dadd(183324.000000,167220.000000,69925.000000,242.343628)}
{pt3dadd(183348.000000,167280.000000,70050.000000,233.497498)}
{pt3dadd(183396.000000,167280.000000,70175.000000,219.062154)}
{pt3dadd(183540.000000,167352.000000,70275.000000,212.591938)}
{pt3dadd(183516.000000,167304.000000,70400.000000,200.532508)}
{pt3dadd(183576.000000,167388.000000,70500.000000,194.062292)}
{pt3dadd(183744.000000,167544.000000,70625.000000,188.473078)}
{pt3dadd(183780.000000,167520.000000,70775.000000,179.474148)}
{pt3dadd(183792.000000,167532.000000,70900.000000,167.598154)}
{pt3dadd(183852.000000,167580.000000,71025.000000,165.909634)}
{pt3dadd(183948.000000,167592.000000,71150.000000,165.909634)}
{pt3dadd(183984.000000,167760.000000,71300.000000,177.969064)}
{pt3dadd(184068.000000,167940.000000,71425.000000,192.557208)}
{pt3dadd(184188.000000,167856.000000,71550.000000,227.064202)}
{pt3dadd(184272.000000,167976.000000,71700.000000,251.052652)}
{pt3dadd(184224.000000,168132.000000,71825.000000,267.763368)}
{pt3dadd(184260.000000,168252.000000,71950.000000,272.633998)}
{pt3dadd(184224.000000,168240.000000,72075.000000,286.594294)}
{pt3dadd(184236.000000,168396.000000,72225.000000,272.809424)}
{pt3dadd(184344.000000,168660.000000,72350.000000,267.439554)}
{pt3dadd(184428.000000,168828.000000,72475.000000,248.774166)}
{pt3dadd(184416.000000,169008.000000,72600.000000,239.485728)}
{pt3dadd(184296.000000,169092.000000,72725.000000,221.709168)}
{pt3dadd(184248.000000,169032.000000,72850.000000,226.823334)}
{pt3dadd(184224.000000,169104.000000,72950.000000,217.534896)}
{pt3dadd(184212.000000,169308.000000,73050.000000,225.959784)}
{pt3dadd(184212.000000,169308.000000,73175.000000,228.114812)}
{pt3dadd(184092.000000,169356.000000,73300.000000,238.401292)}
{pt3dadd(184056.000000,169356.000000,73400.000000,233.287126)}
{pt3dadd(184080.000000,169464.000000,73500.000000,247.945434)}
{pt3dadd(184164.000000,169536.000000,73625.000000,261.073874)}
{pt3dadd(184008.000000,169644.000000,73725.000000,270.826734)}
{pt3dadd(183984.000000,169608.000000,73825.000000,278.316814)}
{pt3dadd(183984.000000,169692.000000,73925.000000,289.069340)}
{pt3dadd(184008.000000,169776.000000,74050.000000,291.957280)}
{pt3dadd(184056.000000,169980.000000,74150.000000,276.566060)}
{pt3dadd(183984.000000,169968.000000,74250.000000,273.946610)}
{pt3dadd(183924.000000,170100.000000,74350.000000,271.327160)}
{pt3dadd(184080.000000,170124.000000,74450.000000,265.688800)}
{pt3dadd(184056.000000,170160.000000,74550.000000,250.297580)}
{pt3dadd(184236.000000,170388.000000,74675.000000,260.050440)}
{pt3dadd(184224.000000,170904.000000,74850.000000,255.179810)}
{pt3dadd(184248.000000,170940.000000,75125.000000,250.309180)}
{pt3dadd(184284.000000,171024.000000,75325.000000,245.195014)}
{pt3dadd(184296.000000,171036.000000,75425.000000,266.802538)}
{pt3dadd(184296.000000,171228.000000,75500.000000,269.552958)}
{pt3dadd(184224.000000,171264.000000,75625.000000,277.043038)}
{pt3dadd(184296.000000,171516.000000,75725.000000,281.913668)}
{pt3dadd(184548.000000,171672.000000,75825.000000,269.251274)}
{pt3dadd(184212.000000,171924.000000,75925.000000,260.147030)}
{pt3dadd(184128.000000,172056.000000,76025.000000,247.643750)}
{pt3dadd(184080.000000,172200.000000,76125.000000,259.498414)}
{pt3dadd(184008.000000,172284.000000,76250.000000,259.498414)}
{pt3dadd(183936.000000,172320.000000,76350.000000,267.522114)}
{pt3dadd(183852.000000,172356.000000,76450.000000,257.281614)}
{pt3dadd(183744.000000,172356.000000,76575.000000,267.034474)}
{pt3dadd(183672.000000,172428.000000,76650.000000,252.560360)}
{pt3dadd(183672.000000,172464.000000,76750.000000,247.689730)}
{pt3dadd(183528.000000,172572.000000,76950.000000,245.534702)}
{pt3dadd(183444.000000,172668.000000,77050.000000,243.271922)}
{pt3dadd(183348.000000,172812.000000,77225.000000,231.364034)}
{pt3dadd(183420.000000,173040.000000,77400.000000,231.364034)}
{pt3dadd(183360.000000,173052.000000,77575.000000,226.946226)}
{pt3dadd(183348.000000,173280.000000,77750.000000,229.101254)}
{pt3dadd(183432.000000,173328.000000,77900.000000,229.101254)}
{pt3dadd(183516.000000,173268.000000,78075.000000,231.256282)}
{pt3dadd(183588.000000,173424.000000,78175.000000,226.385652)}
{pt3dadd(183456.000000,173448.000000,78250.000000,230.803460)}
{pt3dadd(183432.000000,173484.000000,78400.000000,237.936870)}
{pt3dadd(183348.000000,173568.000000,78500.000000,237.936870)}
{pt3dadd(183300.000000,173640.000000,78675.000000,237.936870)}
{pt3dadd(183408.000000,173916.000000,78850.000000,235.674090)}
{pt3dadd(183480.000000,174120.000000,79025.000000,229.203874)}
{pt3dadd(183528.000000,174252.000000,79175.000000,214.046764)}
{pt3dadd(183516.000000,174276.000000,79275.000000,202.561594)}
{pt3dadd(183396.000000,174156.000000,79400.000000,198.354158)}
{pt3dadd(183468.000000,174300.000000,79500.000000,194.146722)}
{pt3dadd(183504.000000,174432.000000,79600.000000,194.146722)}
{pt3dadd(183528.000000,174540.000000,79700.000000,197.962986)}
{pt3dadd(183492.000000,174600.000000,79800.000000,211.710936)}
{pt3dadd(183612.000000,174840.000000,79900.000000,218.181152)}
{pt3dadd(183636.000000,174984.000000,80000.000000,214.364888)}
{pt3dadd(183720.000000,175128.000000,80125.000000,210.548624)}
{pt3dadd(183528.000000,175404.000000,80225.000000,203.303533)}
{pt3dadd(183240.000000,176280.000000,80350.000000,186.159400)}

{create adhoc4}
{access adhoc4}
{connect adhoc4(1), adhoc3(0)}
{nseg = 1}
{strdef color color = "White"}
{pt3dclear()}
{pt3dadd(183240.000000,176280.000000,80350.000000,186.159400)}
{pt3dadd(183024.000000,177036.000000,80125.000000,230.152153)}
{pt3dadd(182880.000000,177060.000000,80025.000000,220.285316)}
{pt3dadd(182844.000000,177048.000000,79925.000000,228.309016)}
{pt3dadd(182784.000000,177096.000000,79800.000000,235.102738)}
{pt3dadd(182712.000000,177156.000000,79700.000000,224.862238)}
{pt3dadd(182664.000000,177324.000000,79625.000000,224.862238)}
{pt3dadd(182700.000000,177264.000000,79525.000000,224.862238)}
{pt3dadd(182544.000000,177336.000000,79425.000000,213.377068)}
{pt3dadd(182520.000000,177408.000000,79275.000000,195.645090)}
{pt3dadd(182496.000000,177396.000000,79175.000000,183.585660)}
{pt3dadd(182376.000000,177420.000000,79100.000000,179.578580)}
{pt3dadd(182388.000000,177360.000000,79000.000000,179.578580)}
{pt3dadd(182376.000000,177516.000000,78850.000000,183.040050)}
{pt3dadd(182268.000000,177528.000000,78725.000000,188.109634)}
{pt3dadd(182244.000000,177528.000000,78625.000000,184.813000)}
{pt3dadd(182136.000000,177684.000000,78525.000000,182.951408)}
{pt3dadd(182028.000000,177636.000000,78450.000000,186.958488)}
{pt3dadd(181968.000000,177708.000000,78275.000000,185.185538)}
{pt3dadd(181896.000000,177828.000000,78125.000000,205.712518)}
{pt3dadd(181860.000000,177984.000000,78025.000000,231.309082)}
{pt3dadd(181812.000000,178032.000000,77925.000000,257.756346)}
{pt3dadd(181800.000000,178008.000000,77825.000000,278.334938)}
{pt3dadd(181716.000000,177936.000000,77725.000000,320.278408)}
{pt3dadd(181692.000000,178032.000000,77550.000000,336.236120)}
{pt3dadd(181752.000000,178116.000000,77400.000000,345.340364)}
{pt3dadd(181776.000000,178248.000000,77275.000000,345.340364)}
{pt3dadd(181764.000000,178236.000000,77175.000000,345.340364)}
{pt3dadd(181728.000000,178320.000000,77075.000000,317.832238)}
{pt3dadd(181752.000000,178476.000000,76950.000000,307.794810)}
{pt3dadd(181620.000000,178332.000000,76850.000000,301.578506)}
{pt3dadd(181728.000000,178524.000000,76750.000000,285.417722)}
{pt3dadd(181752.000000,178500.000000,76650.000000,271.632852)}
{pt3dadd(181704.000000,178440.000000,76550.000000,262.786722)}
{pt3dadd(181692.000000,178596.000000,76450.000000,242.208130)}
{pt3dadd(181560.000000,178584.000000,76350.000000,213.723626)}
{pt3dadd(181572.000000,178596.000000,76225.000000,198.367562)}
{pt3dadd(181632.000000,178680.000000,76125.000000,182.243698)}
{pt3dadd(181704.000000,178656.000000,75925.000000,173.357850)}
{pt3dadd(181740.000000,178644.000000,75800.000000,165.716228)}
{pt3dadd(181524.000000,178632.000000,75700.000000,174.602076)}
{pt3dadd(181500.000000,178668.000000,75600.000000,177.898710)}
{pt3dadd(181596.000000,178788.000000,75500.000000,185.176444)}
{pt3dadd(181572.000000,178752.000000,75375.000000,185.176444)}
{pt3dadd(181584.000000,178728.000000,75275.000000,176.177514)}
{pt3dadd(181668.000000,178836.000000,75150.000000,168.899780)}
{pt3dadd(181776.000000,178836.000000,75050.000000,168.899780)}
{pt3dadd(181836.000000,178872.000000,74950.000000,165.083516)}
{pt3dadd(181788.000000,178848.000000,74850.000000,172.014692)}
{pt3dadd(181716.000000,178836.000000,74750.000000,182.786572)}
{pt3dadd(181728.000000,178884.000000,74625.000000,190.064306)}
{pt3dadd(181728.000000,178872.000000,74525.000000,204.499650)}
{pt3dadd(181764.000000,178920.000000,74425.000000,219.656760)}
{pt3dadd(181776.000000,178956.000000,74300.000000,223.663840)}
{pt3dadd(181764.000000,178920.000000,74200.000000,236.326234)}
{pt3dadd(181788.000000,178968.000000,74075.000000,247.667080)}
{pt3dadd(181680.000000,178872.000000,73975.000000,247.667080)}
{pt3dadd(181764.000000,178884.000000,73875.000000,238.378642)}
{pt3dadd(181668.000000,178908.000000,73750.000000,245.172364)}
{pt3dadd(181560.000000,178908.000000,73650.000000,245.172364)}
{pt3dadd(181488.000000,178872.000000,73525.000000,235.883926)}
{pt3dadd(181476.000000,178824.000000,73425.000000,229.090204)}
{pt3dadd(181476.000000,178788.000000,73325.000000,235.883926)}
{pt3dadd(181392.000000,178872.000000,73200.000000,229.090204)}
{pt3dadd(181308.000000,178944.000000,73100.000000,224.451510)}
{pt3dadd(181368.000000,179052.000000,72975.000000,231.245232)}
{pt3dadd(181320.000000,179028.000000,72875.000000,233.400260)}
{pt3dadd(181284.000000,179112.000000,72775.000000,233.400260)}
{pt3dadd(181128.000000,179136.000000,72575.000000,240.193982)}
{pt3dadd(181104.000000,179208.000000,72500.000000,255.585202)}
{pt3dadd(181152.000000,179280.000000,72325.000000,269.370072)}
{pt3dadd(180972.000000,179280.000000,72175.000000,284.761292)}
{pt3dadd(181044.000000,179448.000000,72000.000000,298.546162)}
{pt3dadd(181020.000000,179520.000000,71825.000000,322.368460)}
{pt3dadd(180900.000000,179496.000000,71750.000000,347.057806)}
{pt3dadd(180912.000000,179520.000000,71650.000000,347.057806)}
{pt3dadd(180912.000000,179592.000000,71475.000000,360.127578)}
{pt3dadd(180876.000000,179628.000000,71275.000000,357.095234)}
{pt3dadd(180948.000000,179796.000000,71100.000000,350.241766)}
{pt3dadd(180960.000000,179892.000000,71000.000000,322.664480)}
{pt3dadd(181008.000000,179868.000000,70900.000000,313.993776)}
{pt3dadd(180936.000000,179856.000000,70775.000000,287.795564)}
{pt3dadd(180972.000000,179916.000000,70675.000000,279.537754)}
{pt3dadd(181176.000000,179868.000000,70575.000000,257.930230)}
{pt3dadd(181284.000000,179916.000000,70475.000000,245.426950)}
{pt3dadd(181104.000000,179796.000000,70400.000000,240.312784)}
{pt3dadd(181104.000000,179700.000000,70200.000000,240.312784)}
{pt3dadd(181164.000000,179772.000000,70125.000000,237.818068)}
{pt3dadd(181092.000000,179748.000000,70025.000000,240.080848)}
{pt3dadd(181020.000000,179712.000000,69925.000000,235.873412)}
{pt3dadd(181008.000000,179688.000000,69825.000000,229.079690)}
{pt3dadd(180888.000000,179628.000000,69725.000000,222.609474)}
{pt3dadd(180864.000000,179628.000000,69625.000000,220.233560)}
{pt3dadd(180924.000000,179748.000000,69525.000000,222.609474)}
{pt3dadd(180876.000000,179760.000000,69425.000000,226.816910)}
{pt3dadd(180768.000000,179652.000000,69325.000000,233.610632)}
{pt3dadd(180768.000000,179712.000000,69225.000000,231.655960)}
{pt3dadd(180828.000000,179676.000000,69150.000000,231.655960)}
{pt3dadd(180780.000000,179616.000000,69025.000000,227.017266)}
{pt3dadd(180660.000000,179664.000000,68950.000000,245.440830)}
{pt3dadd(180480.000000,179568.000000,68850.000000,262.409660)}
{pt3dadd(180480.000000,179628.000000,68750.000000,293.522444)}
{pt3dadd(180180.000000,179496.000000,68550.000000,306.650884)}
{pt3dadd(180156.000000,179472.000000,68475.000000,319.154164)}
{pt3dadd(180036.000000,179328.000000,68375.000000,316.121820)}
{pt3dadd(179928.000000,179232.000000,68275.000000,309.905516)}
{pt3dadd(179784.000000,179160.000000,68175.000000,294.707700)}
{pt3dadd(179568.000000,179100.000000,68075.000000,279.316480)}
{pt3dadd(179436.000000,179016.000000,67875.000000,264.658172)}
{pt3dadd(179316.000000,179004.000000,67775.000000,245.059516)}
{pt3dadd(178992.000000,178872.000000,67575.000000,236.801706)}
{pt3dadd(178596.000000,178944.000000,67450.000000,234.182256)}
{pt3dadd(178380.000000,179016.000000,67350.000000,232.027228)}
{pt3dadd(178176.000000,178956.000000,67225.000000,234.182256)}
{pt3dadd(178200.000000,178836.000000,67125.000000,245.523102)}
{pt3dadd(178056.000000,178752.000000,67025.000000,240.652472)}
{pt3dadd(177972.000000,178740.000000,66925.000000,251.942626)}
{pt3dadd(177660.000000,178860.000000,66725.000000,294.178220)}
{pt3dadd(177300.000000,178920.000000,66525.000000,322.639212)}
{pt3dadd(177288.000000,178920.000000,66400.000000,343.966794)}
{pt3dadd(177228.000000,178836.000000,66300.000000,354.207294)}
{pt3dadd(177024.000000,178872.000000,66175.000000,357.391254)}
{pt3dadd(176796.000000,178872.000000,66075.000000,342.261364)}
{pt3dadd(176184.000000,179220.000000,65950.000000,329.191592)}
{pt3dadd(176136.000000,179184.000000,65850.000000,325.681276)}
{pt3dadd(175956.000000,179148.000000,65725.000000,325.681276)}
{pt3dadd(175752.000000,179220.000000,65575.000000,322.497316)}
{pt3dadd(175440.000000,179172.000000,65450.000000,307.299500)}
{pt3dadd(175044.000000,179076.000000,65325.000000,296.546974)}
{pt3dadd(174888.000000,179184.000000,65200.000000,271.596298)}
{pt3dadd(174564.000000,179064.000000,65075.000000,266.226428)}
{pt3dadd(174384.000000,179100.000000,64950.000000,257.555724)}
{pt3dadd(174192.000000,179124.000000,64825.000000,239.779164)}
{pt3dadd(173880.000000,179016.000000,64700.000000,237.403250)}
{pt3dadd(173400.000000,178956.000000,64600.000000,239.666030)}
{pt3dadd(173112.000000,179148.000000,64500.000000,222.735970)}
{pt3dadd(172896.000000,179076.000000,64375.000000,199.889826)}
{pt3dadd(172596.000000,179028.000000,64250.000000,199.889826)}
{pt3dadd(172428.000000,178968.000000,64100.000000,187.830396)}
{pt3dadd(172248.000000,179040.000000,63975.000000,177.543916)}
{pt3dadd(171732.000000,179040.000000,63600.000000,183.133130)}
{pt3dadd(171612.000000,179064.000000,63475.000000,188.202714)}
{pt3dadd(171324.000000,178932.000000,63350.000000,194.071386)}
{pt3dadd(171036.000000,178908.000000,63100.000000,192.382866)}
{pt3dadd(170760.000000,179016.000000,62875.000000,188.921396)}
{pt3dadd(170616.000000,179004.000000,62750.000000,181.643662)}
{pt3dadd(170568.000000,178896.000000,62625.000000,179.870712)}
{pt3dadd(170532.000000,178812.000000,62500.000000,186.664434)}
{pt3dadd(170292.000000,178800.000000,62375.000000,195.994576)}
{pt3dadd(170100.000000,178788.000000,62250.000000,212.118440)}
{pt3dadd(169848.000000,178704.000000,62100.000000,228.242304)}
{pt3dadd(169596.000000,178740.000000,61975.000000,233.831518)}
{pt3dadd(169344.000000,178764.000000,61850.000000,227.037796)}
{pt3dadd(169188.000000,178692.000000,61725.000000,233.831518)}
{pt3dadd(169008.000000,178560.000000,61600.000000,238.945684)}
{pt3dadd(168732.000000,178680.000000,61450.000000,236.569770)}
{pt3dadd(168564.000000,178608.000000,61325.000000,243.039986)}
{pt3dadd(168288.000000,178560.000000,61200.000000,245.195014)}
{pt3dadd(167964.000000,178572.000000,61075.000000,238.401292)}
{pt3dadd(167820.000000,178704.000000,60925.000000,220.624732)}
{pt3dadd(167544.000000,178572.000000,60800.000000,208.565302)}
{pt3dadd(167292.000000,178548.000000,60675.000000,210.941216)}
{pt3dadd(167052.000000,178572.000000,60550.000000,197.847932)}
{pt3dadd(166800.000000,178608.000000,60450.000000,186.909676)}
{pt3dadd(166476.000000,178536.000000,60325.000000,183.448206)}
{pt3dadd(165936.000000,178620.000000,60200.000000,189.037420)}
{pt3dadd(165504.000000,178668.000000,60075.000000,176.375026)}
{pt3dadd(165048.000000,178692.000000,59925.000000,187.313282)}
{pt3dadd(164712.000000,178584.000000,59800.000000,207.539976)}
{pt3dadd(164472.000000,178632.000000,59675.000000,219.025146)}
{pt3dadd(164124.000000,178776.000000,59575.000000,235.735862)}
{pt3dadd(163980.000000,178788.000000,59475.000000,259.150790)}
{pt3dadd(163392.000000,178716.000000,59350.000000,237.818946)}
{pt3dadd(163164.000000,178692.000000,59225.000000,213.212958)}
{pt3dadd(163044.000000,178848.000000,59150.000000,197.129528)}
{pt3dadd(162840.000000,178944.000000,59075.000000,167.153668)}
{pt3dadd(162600.000000,178980.000000,58925.000000,134.289862)}
{pt3dadd(162384.000000,178872.000000,58800.000000,143.151914)}
{pt3dadd(162264.000000,179064.000000,58675.000000,143.151912)}
{pt3dadd(162072.000000,179040.000000,58550.000000,155.027906)}
{pt3dadd(162012.000000,179028.000000,58400.000000,166.338376)}
{pt3dadd(161868.000000,178944.000000,58275.000000,163.755374)}
{pt3dadd(161688.000000,178896.000000,58125.000000,147.156917)}
{pt3dadd(161676.000000,179004.000000,58000.000000,145.833917)}
{pt3dadd(161628.000000,179100.000000,57900.000000,140.244703)}
{pt3dadd(161580.000000,179100.000000,57750.000000,133.313529)}
{pt3dadd(161472.000000,178860.000000,57625.000000,143.572459)}
{pt3dadd(161460.000000,178896.000000,57400.000000,166.772036)}
{pt3dadd(161424.000000,178980.000000,57175.000000,174.082446)}
{pt3dadd(161364.000000,179004.000000,57050.000000,169.254276)}
{pt3dadd(161280.000000,179016.000000,56900.000000,164.874980)}
{pt3dadd(161232.000000,179052.000000,56775.000000,154.616050)}
{pt3dadd(161976.000000,179136.000000,56450.000000,142.584170)}
{pt3dadd(162084.000000,179244.000000,56225.000000,139.444520)}
{pt3dadd(162252.000000,179304.000000,56100.000000,136.596760)}
{pt3dadd(162336.000000,179292.000000,56000.000000,136.596760)}
{pt3dadd(162300.000000,179316.000000,55900.000000,142.027520)}
{pt3dadd(162348.000000,179412.000000,55775.000000,142.027520)}
{pt3dadd(162384.000000,179520.000000,55650.000000,146.855690)}
{pt3dadd(162600.000000,179424.000000,55525.000000,176.831550)}
{pt3dadd(162576.000000,179484.000000,55400.000000,194.304130)}
{pt3dadd(162540.000000,179496.000000,55275.000000,202.766842)}
{pt3dadd(162636.000000,179472.000000,55150.000000,205.349842)}
{pt3dadd(162864.000000,179376.000000,54725.000000,200.521672)}
{pt3dadd(163032.000000,179316.000000,54475.000000,171.934962)}
{pt3dadd(162948.000000,179148.000000,54225.000000,154.462382)}
{pt3dadd(162996.000000,178980.000000,54100.000000,141.828910)}
{pt3dadd(162972.000000,178944.000000,53775.000000,141.828910)}
{pt3dadd(162924.000000,178884.000000,53650.000000,137.658150)}
{pt3dadd(162972.000000,178824.000000,53525.000000,140.648296)}
{pt3dadd(162948.000000,178752.000000,53275.000000,137.913155)}
{pt3dadd(162876.000000,178728.000000,53150.000000,140.625305)}
{pt3dadd(162732.000000,178596.000000,52925.000000,142.014455)}
{pt3dadd(162708.000000,178656.000000,52575.000000,147.716751)}
{pt3dadd(162684.000000,178764.000000,52450.000000,151.013385)}
{pt3dadd(162648.000000,178740.000000,52300.000000,161.424456)}
{pt3dadd(162744.000000,178692.000000,52175.000000,175.352858)}
{pt3dadd(162852.000000,178740.000000,52050.000000,183.412588)}
{pt3dadd(162900.000000,178728.000000,51925.000000,186.709222)}
{pt3dadd(162924.000000,178764.000000,51800.000000,183.412588)}
{pt3dadd(162972.000000,178872.000000,51600.000000,187.047130)}
{pt3dadd(162948.000000,178872.000000,51475.000000,181.178458)}
{pt3dadd(163032.000000,178704.000000,51325.000000,184.994722)}
{pt3dadd(163200.000000,178680.000000,51225.000000,192.636344)}
{pt3dadd(163416.000000,178680.000000,51100.000000,207.992408)}
{pt3dadd(163656.000000,178464.000000,50975.000000,209.947080)}
{pt3dadd(163884.000000,178452.000000,50850.000000,227.723640)}
{pt3dadd(163644.000000,178308.000000,50725.000000,241.683936)}
{pt3dadd(163752.000000,178356.000000,50600.000000,250.972374)}
{pt3dadd(163716.000000,178140.000000,50375.000000,246.554566)}
{pt3dadd(163740.000000,177972.000000,50250.000000,242.738302)}
{pt3dadd(163800.000000,178008.000000,50125.000000,230.830414)}
{pt3dadd(164052.000000,177816.000000,49875.000000,216.870118)}
{pt3dadd(164280.000000,177612.000000,49750.000000,207.581680)}
{pt3dadd(164304.000000,177552.000000,49625.000000,205.529272)}
{pt3dadd(164352.000000,177588.000000,49475.000000,215.815752)}
{pt3dadd(164472.000000,177564.000000,49375.000000,211.808672)}
{pt3dadd(164568.000000,177276.000000,49225.000000,204.530938)}
{pt3dadd(164496.000000,177336.000000,49100.000000,183.199094)}
{pt3dadd(164964.000000,177420.000000,48850.000000,168.610950)}
{pt3dadd(165240.000000,177108.000000,48525.000000,147.552590)}
{pt3dadd(165408.000000,177192.000000,48400.000000,134.919118)}
{pt3dadd(165360.000000,177240.000000,48200.000000,127.608708)}
{pt3dadd(165468.000000,177144.000000,48075.000000,135.012150)}
{pt3dadd(165492.000000,177180.000000,47950.000000,137.724300)}
{pt3dadd(165504.000000,177132.000000,47700.000000,137.724300)}
{pt3dadd(165600.000000,176988.000000,47575.000000,131.009160)}
{pt3dadd(165672.000000,177144.000000,47450.000000,126.317868)}
{pt3dadd(165540.000000,177144.000000,47325.000000,121.145718)}
{pt3dadd(165552.000000,177108.000000,47175.000000,118.433568)}
{pt3dadd(165480.000000,177132.000000,47050.000000,119.756568)}
{pt3dadd(165516.000000,177276.000000,46825.000000,143.112260)}
{pt3dadd(165480.000000,177300.000000,46575.000000,162.391696)}
{pt3dadd(165528.000000,177480.000000,46450.000000,170.553992)}
{pt3dadd(165516.000000,177588.000000,46200.000000,193.851653)}
{pt3dadd(165732.000000,177060.000000,45975.000000,160.811480)}

{create adhoc5}
{access adhoc5}
{connect adhoc5(1), adhoc4(0)}
{nseg = 1}
{strdef color color = "White"}
{pt3dclear()}
{pt3dadd(165732.000000,177060.000000,45975.000000,160.811480)}
{pt3dadd(165768.000000,176856.000000,45825.000000,141.803827)}
{pt3dadd(165804.000000,176808.000000,45700.000000,132.051004)}
{pt3dadd(165828.000000,176760.000000,45575.000000,130.519468)}
{pt3dadd(165936.000000,176496.000000,45450.000000,133.231618)}
{pt3dadd(166176.000000,176028.000000,45125.000000,135.952697)}
{pt3dadd(166464.000000,175656.000000,45025.000000,145.860750)}

{create adhoc6}
{access adhoc6}
{connect adhoc6(1), adhoc4(0)}
{nseg = 1}
{strdef color color = "White"}
{pt3dclear()}
{pt3dadd(165732.000000,177060.000000,45975.000000,160.811480)}
{pt3dadd(165216.000000,177324.000000,45775.000000,158.258920)}
{pt3dadd(164868.000000,177432.000000,45575.000000,155.185762)}
{pt3dadd(164688.000000,177684.000000,45400.000000,153.654226)}
{pt3dadd(164664.000000,177864.000000,45200.000000,145.491930)}
{pt3dadd(164688.000000,178176.000000,45000.000000,141.321170)}
{pt3dadd(164808.000000,178404.000000,44775.000000,132.750760)}
{pt3dadd(165000.000000,178668.000000,44575.000000,127.022863)}
{pt3dadd(165444.000000,179016.000000,44400.000000,121.592103)}
{pt3dadd(165684.000000,179148.000000,44275.000000,128.222863)}
{pt3dadd(165768.000000,179328.000000,44175.000000,132.393623)}
{pt3dadd(165912.000000,179556.000000,44025.000000,134.976623)}
{pt3dadd(166152.000000,179616.000000,43900.000000,149.703450)}
{pt3dadd(166380.000000,179736.000000,43775.000000,156.665746)}
{pt3dadd(166512.000000,179988.000000,43650.000000,158.197282)}
{pt3dadd(166536.000000,180168.000000,43475.000000,168.614666)}
{pt3dadd(166572.000000,180456.000000,43275.000000,170.003816)}
{pt3dadd(167124.000000,180696.000000,42950.000000,170.637650)}
{pt3dadd(167448.000000,180564.000000,42825.000000,145.860750)}

{create adhoc7}
{access adhoc7}
{connect adhoc7(1), adhoc3(0)}
{nseg = 1}
{strdef color color = "White"}
{pt3dclear()}
{pt3dadd(183240.000000,176280.000000,80350.000000,186.159400)}
{pt3dadd(183324.000000,176424.000000,80475.000000,180.812747)}
{pt3dadd(183276.000000,176436.000000,80600.000000,233.109612)}
{pt3dadd(183372.000000,176580.000000,80700.000000,262.740836)}
{pt3dadd(183432.000000,176580.000000,80825.000000,304.295112)}
{pt3dadd(183516.000000,176724.000000,80925.000000,338.918212)}
{pt3dadd(183600.000000,176712.000000,81075.000000,366.495498)}
{pt3dadd(183480.000000,176760.000000,81175.000000,384.968540)}
{pt3dadd(183432.000000,176772.000000,81300.000000,403.441582)}
{pt3dadd(183456.000000,176724.000000,81400.000000,387.483870)}
{pt3dadd(183720.000000,176940.000000,81525.000000,356.867850)}
{pt3dadd(183960.000000,177024.000000,81775.000000,321.425978)}
{pt3dadd(184152.000000,177108.000000,81900.000000,283.608192)}
{pt3dadd(184272.000000,177180.000000,82050.000000,256.030906)}
{pt3dadd(184368.000000,177156.000000,82200.000000,243.527626)}
{pt3dadd(184404.000000,177084.000000,82275.000000,264.106218)}
{pt3dadd(184572.000000,177204.000000,82400.000000,287.928516)}
{pt3dadd(184752.000000,177228.000000,82525.000000,307.273260)}
{pt3dadd(184752.000000,177240.000000,82625.000000,319.720656)}
{pt3dadd(184896.000000,177228.000000,82750.000000,351.867476)}
{pt3dadd(185184.000000,177312.000000,82900.000000,348.835132)}
{pt3dadd(185304.000000,177600.000000,83025.000000,327.507550)}
{pt3dadd(185400.000000,177624.000000,83150.000000,334.361018)}
{pt3dadd(185700.000000,177720.000000,83300.000000,321.913622)}
{pt3dadd(185892.000000,177888.000000,83450.000000,305.158022)}
{pt3dadd(185868.000000,177936.000000,83575.000000,302.270082)}
{pt3dadd(186108.000000,177948.000000,83725.000000,299.775366)}
{pt3dadd(186408.000000,178044.000000,83850.000000,281.067234)}
{pt3dadd(186588.000000,178212.000000,84000.000000,283.955174)}
{pt3dadd(186636.000000,178248.000000,84150.000000,281.067234)}
{pt3dadd(186684.000000,178332.000000,84275.000000,270.826734)}
{pt3dadd(186924.000000,178416.000000,84400.000000,270.826734)}
{pt3dadd(187104.000000,178488.000000,84550.000000,268.207284)}
{pt3dadd(187188.000000,178536.000000,84675.000000,252.816064)}
{pt3dadd(187248.000000,178608.000000,84825.000000,247.446194)}
{pt3dadd(187260.000000,178752.000000,84950.000000,254.936274)}
{pt3dadd(187464.000000,178800.000000,85075.000000,278.758572)}
{pt3dadd(187536.000000,178836.000000,85225.000000,278.758572)}
{pt3dadd(187776.000000,178944.000000,85350.000000,294.149792)}
{pt3dadd(188028.000000,179052.000000,85475.000000,294.149792)}
{pt3dadd(188268.000000,179100.000000,85600.000000,294.149792)}
{pt3dadd(188388.000000,179136.000000,85750.000000,281.080020)}
{pt3dadd(188472.000000,179328.000000,85875.000000,278.585304)}
{pt3dadd(188544.000000,179472.000000,86025.000000,272.946944)}
{pt3dadd(188580.000000,179400.000000,86125.000000,284.237098)}
{pt3dadd(188664.000000,179436.000000,86275.000000,281.617648)}
{pt3dadd(188928.000000,179544.000000,86400.000000,273.359838)}
{pt3dadd(189012.000000,179580.000000,86550.000000,275.854554)}
{pt3dadd(189084.000000,179712.000000,86675.000000,270.740388)}
{pt3dadd(189072.000000,179772.000000,86825.000000,267.708044)}
{pt3dadd(189264.000000,179664.000000,86975.000000,273.077914)}
{pt3dadd(189420.000000,179604.000000,87075.000000,281.335724)}
{pt3dadd(189840.000000,179748.000000,87450.000000,278.841008)}
{pt3dadd(190140.000000,180012.000000,87600.000000,292.625878)}
{pt3dadd(190044.000000,179952.000000,87775.000000,292.625878)}
{pt3dadd(190248.000000,180288.000000,87900.000000,305.073274)}
{pt3dadd(190368.000000,180276.000000,88025.000000,314.632730)}
{pt3dadd(190476.000000,180384.000000,88150.000000,373.651408)}
{pt3dadd(190656.000000,180636.000000,88275.000000,413.698876)}
{pt3dadd(190776.000000,180996.000000,88425.000000,430.454476)}
{pt3dadd(190884.000000,181140.000000,88550.000000,430.454476)}
{pt3dadd(191016.000000,181188.000000,88700.000000,433.964792)}
{pt3dadd(191088.000000,181260.000000,88825.000000,388.730984)}
{pt3dadd(191148.000000,181512.000000,88975.000000,337.393362)}
{pt3dadd(191136.000000,181680.000000,89100.000000,345.327108)}
{pt3dadd(191160.000000,181800.000000,89250.000000,345.327108)}
{pt3dadd(191160.000000,182016.000000,89375.000000,352.883052)}
{pt3dadd(191196.000000,182088.000000,89525.000000,370.476424)}
{pt3dadd(191316.000000,182304.000000,89650.000000,403.423580)}
{pt3dadd(191436.000000,182628.000000,89800.000000,407.690388)}
{pt3dadd(191460.000000,182844.000000,89925.000000,441.210744)}
{pt3dadd(191508.000000,183216.000000,90075.000000,445.274374)}
{pt3dadd(191508.000000,183300.000000,90225.000000,445.274374)}
{pt3dadd(191592.000000,183384.000000,90350.000000,454.021328)}
{pt3dadd(191664.000000,183396.000000,90500.000000,449.754520)}
{pt3dadd(191712.000000,183528.000000,90625.000000,427.300424)}
{pt3dadd(191676.000000,183684.000000,90750.000000,431.567232)}
{pt3dadd(191676.000000,183888.000000,90900.000000,431.567232)}
{pt3dadd(191652.000000,183984.000000,91025.000000,398.130932)}
{pt3dadd(191736.000000,184092.000000,91175.000000,390.197186)}
{pt3dadd(191868.000000,184248.000000,91300.000000,369.571470)}
{pt3dadd(192048.000000,184296.000000,91400.000000,350.174772)}
{pt3dadd(191916.000000,184404.000000,91600.000000,346.304656)}
{pt3dadd(192624.000000,184680.000000,91725.000000,370.994002)}
{pt3dadd(192576.000000,184788.000000,92025.000000,374.864118)}
{pt3dadd(192504.000000,184896.000000,92250.000000,408.300418)}
{pt3dadd(192360.000000,185028.000000,92450.000000,411.810734)}
{pt3dadd(192468.000000,185088.000000,92650.000000,415.680850)}
{pt3dadd(192564.000000,185160.000000,92800.000000,424.427804)}
{pt3dadd(192660.000000,185220.000000,92900.000000,446.881900)}
{pt3dadd(192492.000000,185304.000000,93150.000000,438.134946)}
{pt3dadd(192564.000000,185436.000000,93250.000000,449.754520)}
{pt3dadd(192636.000000,185568.000000,93400.000000,438.688260)}
{pt3dadd(192720.000000,185652.000000,93550.000000,425.877676)}
{pt3dadd(192816.000000,185784.000000,93675.000000,395.867636)}
{pt3dadd(192948.000000,185916.000000,93775.000000,387.933890)}
{pt3dadd(192816.000000,185964.000000,93925.000000,383.870260)}
{pt3dadd(192972.000000,186156.000000,94125.000000,403.266958)}
{pt3dadd(193032.000000,186300.000000,94250.000000,395.711014)}
{pt3dadd(193080.000000,186168.000000,94375.000000,411.597396)}
{pt3dadd(193116.000000,186420.000000,94575.000000,397.874140)}
{pt3dadd(193128.000000,186552.000000,94700.000000,386.807880)}
{pt3dadd(193152.000000,186624.000000,94825.000000,374.607326)}
{pt3dadd(193212.000000,186672.000000,94950.000000,367.753858)}
{pt3dadd(193176.000000,186864.000000,95100.000000,359.423420)}
{pt3dadd(193032.000000,187080.000000,95325.000000,362.607380)}
{pt3dadd(193032.000000,187152.000000,95475.000000,359.264228)}
{pt3dadd(193068.000000,187164.000000,95600.000000,327.117408)}
{pt3dadd(193164.000000,187320.000000,95700.000000,297.486184)}
{pt3dadd(192996.000000,187428.000000,95975.000000,255.307140)}
{pt3dadd(192996.000000,187560.000000,96100.000000,227.537508)}
{pt3dadd(192960.000000,187620.000000,96225.000000,196.133334)}
{pt3dadd(193044.000000,187716.000000,96350.000000,186.336684)}
{pt3dadd(193128.000000,187608.000000,96450.000000,192.205356)}
{pt3dadd(193140.000000,187704.000000,96575.000000,188.570814)}
{pt3dadd(193092.000000,187908.000000,96700.000000,199.371616)}
{pt3dadd(192996.000000,188028.000000,96825.000000,213.806960)}
{pt3dadd(192924.000000,188004.000000,96950.000000,213.806960)}
{pt3dadd(192840.000000,188004.000000,97075.000000,215.961988)}
{pt3dadd(192732.000000,188076.000000,97225.000000,225.758638)}
{pt3dadd(192528.000000,188268.000000,97350.000000,223.382724)}
{pt3dadd(192540.000000,188352.000000,97450.000000,216.589002)}
{pt3dadd(192444.000000,188388.000000,97550.000000,231.024346)}
{pt3dadd(192312.000000,188388.000000,97675.000000,217.931062)}
{pt3dadd(192180.000000,188460.000000,97800.000000,227.683922)}
{pt3dadd(192048.000000,188436.000000,97925.000000,223.266114)}
{pt3dadd(191976.000000,188436.000000,98175.000000,221.213706)}
{pt3dadd(191880.000000,188496.000000,98300.000000,226.327872)}
{pt3dadd(191676.000000,188388.000000,98500.000000,246.554566)}
{pt3dadd(191676.000000,188436.000000,98750.000000,246.554566)}
{pt3dadd(191616.000000,188388.000000,98875.000000,255.843004)}
{pt3dadd(191292.000000,188424.000000,99100.000000,285.001116)}
{pt3dadd(191340.000000,188280.000000,99300.000000,296.006143)}
{pt3dadd(190776.000000,188148.000000,99425.000000,351.031280)}

{create adhoc8}
{access adhoc8}
{connect adhoc8(1), adhoc7(0)}
{nseg = 1}
{strdef color color = "White"}
{pt3dclear()}
{pt3dadd(190776.000000,188148.000000,99425.000000,351.031280)}
{pt3dadd(190860.000000,188040.000000,99650.000000,329.526933)}
{pt3dadd(190860.000000,188088.000000,99875.000000,345.149304)}
{pt3dadd(190956.000000,188016.000000,100150.000000,360.279194)}
{pt3dadd(191016.000000,188052.000000,100375.000000,389.235348)}
{pt3dadd(190968.000000,187896.000000,100625.000000,403.644760)}
{pt3dadd(191004.000000,188004.000000,100875.000000,419.531142)}
{pt3dadd(190992.000000,187908.000000,101150.000000,423.216970)}
{pt3dadd(190992.000000,187884.000000,101275.000000,427.483778)}
{pt3dadd(191076.000000,188004.000000,101500.000000,427.483778)}
{pt3dadd(191016.000000,188076.000000,101675.000000,427.483778)}
{pt3dadd(191016.000000,188088.000000,101850.000000,441.607436)}
{pt3dadd(190884.000000,187968.000000,101975.000000,462.992292)}
{pt3dadd(190800.000000,187896.000000,102150.000000,467.472438)}
{pt3dadd(190728.000000,187896.000000,102250.000000,494.328280)}
{pt3dadd(190680.000000,187704.000000,102425.000000,470.415500)}

{create adhoc9}
{access adhoc9}
{connect adhoc9(1), adhoc8(0)}
{nseg = 1}
{strdef color color = "White"}
{pt3dclear()}
{pt3dadd(190680.000000,187704.000000,102425.000000,470.415500)}
{pt3dadd(190632.000000,186588.000000,102425.000000,333.399460)}
{pt3dadd(190656.000000,185736.000000,102425.000000,302.322940)}
{pt3dadd(190500.000000,185220.000000,102200.000000,260.628830)}
{pt3dadd(190464.000000,184812.000000,102075.000000,254.412526)}
{pt3dadd(190272.000000,184248.000000,101950.000000,260.574634)}
{pt3dadd(190212.000000,183732.000000,101825.000000,263.069350)}
{pt3dadd(190080.000000,183132.000000,101700.000000,271.327160)}
{pt3dadd(190080.000000,182796.000000,101575.000000,273.946610)}
{pt3dadd(190152.000000,182520.000000,101450.000000,258.555390)}
{pt3dadd(190200.000000,182364.000000,101325.000000,260.818170)}
{pt3dadd(190248.000000,181776.000000,101200.000000,260.818170)}
{pt3dadd(190164.000000,181476.000000,101075.000000,270.377626)}
{pt3dadd(190200.000000,181224.000000,100950.000000,282.232290)}
{pt3dadd(190200.000000,180708.000000,100825.000000,284.495070)}
{pt3dadd(190260.000000,180240.000000,100675.000000,294.735570)}
{pt3dadd(190392.000000,179928.000000,100550.000000,292.240854)}
{pt3dadd(190476.000000,179496.000000,100400.000000,279.793458)}
{pt3dadd(190620.000000,179088.000000,100275.000000,276.609498)}
{pt3dadd(190656.000000,178968.000000,100150.000000,284.099578)}
{pt3dadd(190632.000000,178680.000000,100000.000000,286.987518)}
{pt3dadd(190740.000000,178536.000000,99875.000000,289.482234)}
{pt3dadd(190740.000000,178296.000000,99725.000000,286.731814)}
{pt3dadd(190836.000000,178200.000000,99600.000000,278.061110)}
{pt3dadd(190800.000000,178080.000000,99475.000000,272.946944)}
{pt3dadd(190704.000000,177768.000000,99350.000000,272.946944)}
{pt3dadd(190620.000000,177576.000000,99225.000000,261.606098)}
{pt3dadd(190716.000000,177528.000000,99100.000000,267.244458)}
{pt3dadd(190728.000000,177312.000000,98975.000000,264.625008)}
{pt3dadd(190788.000000,177156.000000,98825.000000,269.739174)}
{pt3dadd(190800.000000,176988.000000,98700.000000,261.481364)}
{pt3dadd(190824.000000,176832.000000,98550.000000,275.441660)}
{pt3dadd(190800.000000,176616.000000,98425.000000,272.553720)}
{pt3dadd(190836.000000,176556.000000,98300.000000,272.553720)}
{pt3dadd(190908.000000,176436.000000,98175.000000,281.224424)}
{pt3dadd(190836.000000,176364.000000,98025.000000,292.514578)}
{pt3dadd(190872.000000,176244.000000,97900.000000,298.152938)}
{pt3dadd(190932.000000,176112.000000,97750.000000,295.402518)}
{pt3dadd(191064.000000,175956.000000,97625.000000,292.907802)}
{pt3dadd(190980.000000,175908.000000,97500.000000,281.617648)}
{pt3dadd(190968.000000,175752.000000,97350.000000,281.617648)}
{pt3dadd(190956.000000,175728.000000,97200.000000,287.833952)}
{pt3dadd(191004.000000,175608.000000,97050.000000,299.688616)}
{pt3dadd(190980.000000,175452.000000,96925.000000,304.802782)}
{pt3dadd(190980.000000,175308.000000,96775.000000,313.060592)}
{pt3dadd(190968.000000,175284.000000,96625.000000,319.587704)}
{pt3dadd(190992.000000,175044.000000,96500.000000,316.403744)}
{pt3dadd(190992.000000,174936.000000,96375.000000,307.299500)}
{pt3dadd(191064.000000,174864.000000,96250.000000,310.049920)}
{pt3dadd(191196.000000,174732.000000,96150.000000,304.411560)}
{pt3dadd(191184.000000,174612.000000,96025.000000,297.884448)}
{pt3dadd(191160.000000,174492.000000,95900.000000,301.068408)}
{pt3dadd(191184.000000,174324.000000,95775.000000,317.026120)}
{pt3dadd(191244.000000,174216.000000,95650.000000,322.946404)}
{pt3dadd(191292.000000,174108.000000,95550.000000,345.340364)}
{pt3dadd(191388.000000,174168.000000,95425.000000,355.377792)}
{pt3dadd(191508.000000,174060.000000,95275.000000,349.161488)}
{pt3dadd(191712.000000,173772.000000,95150.000000,325.339190)}
{pt3dadd(191844.000000,173760.000000,95000.000000,319.418906)}
{pt3dadd(191748.000000,173688.000000,94875.000000,297.024946)}
{pt3dadd(191760.000000,173556.000000,94750.000000,278.316814)}
{pt3dadd(191700.000000,173472.000000,94625.000000,275.428874)}
{pt3dadd(191772.000000,173340.000000,94500.000000,264.628072)}
{pt3dadd(191820.000000,173340.000000,94375.000000,256.763486)}
{pt3dadd(191796.000000,173172.000000,94225.000000,251.649320)}
{pt3dadd(191796.000000,173124.000000,94100.000000,233.872760)}
{pt3dadd(191772.000000,173016.000000,94000.000000,226.008174)}
{pt3dadd(191856.000000,173016.000000,93875.000000,234.433062)}
{pt3dadd(191940.000000,172872.000000,93725.000000,234.433062)}
{pt3dadd(191784.000000,172860.000000,93600.000000,251.401892)}
{pt3dadd(191952.000000,172524.000000,93475.000000,277.849156)}
{pt3dadd(192060.000000,172464.000000,93375.000000,326.742138)}
{pt3dadd(191988.000000,172224.000000,93250.000000,360.496294)}
{pt3dadd(191988.000000,171876.000000,93150.000000,380.808276)}
{pt3dadd(191952.000000,171552.000000,93025.000000,399.281318)}
{pt3dadd(191928.000000,170784.000000,92925.000000,434.389430)}
{pt3dadd(191916.000000,170652.000000,92700.000000,455.678694)}
{pt3dadd(191892.000000,170208.000000,92600.000000,441.269282)}
{pt3dadd(191676.000000,169836.000000,92500.000000,448.465426)}
{pt3dadd(191664.000000,169536.000000,92400.000000,444.401796)}
{pt3dadd(191652.000000,169248.000000,92275.000000,419.331112)}
{pt3dadd(191556.000000,169068.000000,92175.000000,369.460848)}
{pt3dadd(191364.000000,168756.000000,92050.000000,383.870260)}
{pt3dadd(191160.000000,168096.000000,91950.000000,373.330964)}
{pt3dadd(190896.000000,167184.000000,91875.000000,369.460848)}
{pt3dadd(190764.000000,166380.000000,92000.000000,369.460848)}
{pt3dadd(190752.000000,165816.000000,92125.000000,366.117696)}
{pt3dadd(190788.000000,165432.000000,92225.000000,362.247580)}
{pt3dadd(190908.000000,165156.000000,92350.000000,369.101048)}
{pt3dadd(190992.000000,164916.000000,92475.000000,355.377792)}
{pt3dadd(190980.000000,164748.000000,92575.000000,359.063620)}
{pt3dadd(191052.000000,164268.000000,92700.000000,349.959376)}
{pt3dadd(191220.000000,163608.000000,92800.000000,330.315836)}
{pt3dadd(191232.000000,162552.000000,92475.000000,304.117624)}
{pt3dadd(191208.000000,162084.000000,92375.000000,321.710996)}
{pt3dadd(191148.000000,161940.000000,92250.000000,307.987740)}
{pt3dadd(191148.000000,161952.000000,92125.000000,320.435136)}
{pt3dadd(191124.000000,161592.000000,92000.000000,307.931856)}
{pt3dadd(191184.000000,161280.000000,91875.000000,327.276600)}
{pt3dadd(191376.000000,160848.000000,91750.000000,319.720656)}
{pt3dadd(192192.000000,160452.000000,91650.000000,316.688312)}
{pt3dadd(192444.000000,160116.000000,91525.000000,294.000416)}
{pt3dadd(192672.000000,159648.000000,91225.000000,301.133826)}
{pt3dadd(193056.000000,159180.000000,91125.000000,297.949866)}
{pt3dadd(193524.000000,158964.000000,91000.000000,279.241734)}
{pt3dadd(193740.000000,158712.000000,90775.000000,270.983924)}
{pt3dadd(193848.000000,158556.000000,90650.000000,273.359838)}
{pt3dadd(193872.000000,158376.000000,90525.000000,266.226428)}
{pt3dadd(193944.000000,158268.000000,90325.000000,260.306144)}
{pt3dadd(193968.000000,158112.000000,90200.000000,260.306144)}
{pt3dadd(193980.000000,158004.000000,90100.000000,260.306144)}
{pt3dadd(193980.000000,157848.000000,89900.000000,255.667450)}
{pt3dadd(194088.000000,157716.000000,89775.000000,265.420310)}
{pt3dadd(194148.000000,157356.000000,89600.000000,265.420310)}
{pt3dadd(194244.000000,157032.000000,89500.000000,277.274974)}
{pt3dadd(194196.000000,156948.000000,89375.000000,274.780258)}
{pt3dadd(194160.000000,156720.000000,89250.000000,287.283538)}
{pt3dadd(194256.000000,156660.000000,89175.000000,284.664088)}
{pt3dadd(194220.000000,156276.000000,89075.000000,287.552028)}
{pt3dadd(194280.000000,156252.000000,88925.000000,284.368068)}
{pt3dadd(194148.000000,156000.000000,88825.000000,279.729374)}
{pt3dadd(194208.000000,155784.000000,88700.000000,269.488874)}
{pt3dadd(194184.000000,155532.000000,88575.000000,277.746684)}
{pt3dadd(194052.000000,155352.000000,88475.000000,277.746684)}
{pt3dadd(194076.000000,154932.000000,88400.000000,277.746684)}
{pt3dadd(194004.000000,154752.000000,88275.000000,299.354208)}
{pt3dadd(193992.000000,154500.000000,88150.000000,304.224838)}
{pt3dadd(194040.000000,154416.000000,88050.000000,304.224838)}
{pt3dadd(194016.000000,154344.000000,87925.000000,293.472312)}
{pt3dadd(193860.000000,154152.000000,87800.000000,270.841312)}
{pt3dadd(193788.000000,154140.000000,87650.000000,247.078760)}
{pt3dadd(193656.000000,153936.000000,87550.000000,255.336570)}
{pt3dadd(193668.000000,153924.000000,87425.000000,255.336570)}
{pt3dadd(193716.000000,153900.000000,87325.000000,266.089096)}
{pt3dadd(193692.000000,153840.000000,87225.000000,270.296532)}
{pt3dadd(193656.000000,153756.000000,87100.000000,272.451560)}
{pt3dadd(193608.000000,153540.000000,87000.000000,269.563620)}
{pt3dadd(193584.000000,153324.000000,86925.000000,269.563620)}
{pt3dadd(193620.000000,153180.000000,86800.000000,266.675680)}
{pt3dadd(193596.000000,153120.000000,86675.000000,271.314374)}
{pt3dadd(193620.000000,152952.000000,86575.000000,280.499890)}
{pt3dadd(193440.000000,152412.000000,86450.000000,249.471370)}

{create adhoc10}
{access adhoc10}
{connect adhoc10(1), adhoc9(0)}
{nseg = 1}
{strdef color color = "White"}
{pt3dclear()}
{pt3dadd(193440.000000,152412.000000,86450.000000,249.471370)}
{pt3dadd(193404.000000,152304.000000,86350.000000,306.299457)}
{pt3dadd(193356.000000,152100.000000,86250.000000,299.434914)}
{pt3dadd(193332.000000,151932.000000,86125.000000,307.299500)}
{pt3dadd(193188.000000,151704.000000,86000.000000,288.875936)}
{pt3dadd(193056.000000,151584.000000,85800.000000,255.901560)}
{pt3dadd(193116.000000,151668.000000,85600.000000,236.302904)}
{pt3dadd(192984.000000,151560.000000,85500.000000,226.550044)}
{pt3dadd(192984.000000,151632.000000,85400.000000,221.180174)}
{pt3dadd(192960.000000,151524.000000,85275.000000,230.933034)}
{pt3dadd(192936.000000,151716.000000,85150.000000,243.595428)}
{pt3dadd(192888.000000,151632.000000,85025.000000,263.194084)}
{pt3dadd(192768.000000,151476.000000,84925.000000,272.946944)}
{pt3dadd(192792.000000,151380.000000,84800.000000,270.452228)}
{pt3dadd(192840.000000,151440.000000,84675.000000,262.962148)}
{pt3dadd(192864.000000,151344.000000,84550.000000,268.076314)}
{pt3dadd(192732.000000,151284.000000,84425.000000,271.108658)}
{pt3dadd(192684.000000,151344.000000,84325.000000,271.108658)}
{pt3dadd(192672.000000,151260.000000,84200.000000,278.973244)}
{pt3dadd(192624.000000,151284.000000,84075.000000,289.213744)}
{pt3dadd(192588.000000,151224.000000,83975.000000,277.305856)}
{pt3dadd(192516.000000,151092.000000,83850.000000,277.305856)}
{pt3dadd(192324.000000,150840.000000,83750.000000,277.305856)}
{pt3dadd(192276.000000,150732.000000,83625.000000,271.935986)}
{pt3dadd(192180.000000,150612.000000,83500.000000,274.823926)}
{pt3dadd(192120.000000,150468.000000,83375.000000,298.586478)}
{pt3dadd(192108.000000,150408.000000,83325.000000,298.586478)}
{pt3dadd(191976.000000,150348.000000,83225.000000,293.472312)}
{pt3dadd(191904.000000,150264.000000,83125.000000,290.977596)}
{pt3dadd(191736.000000,150072.000000,83000.000000,269.424268)}
{pt3dadd(191676.000000,150012.000000,82900.000000,245.661716)}
{pt3dadd(191544.000000,149772.000000,82825.000000,215.752982)}
{pt3dadd(191472.000000,149748.000000,82700.000000,203.090588)}
{pt3dadd(191436.000000,149676.000000,82625.000000,196.296866)}
{pt3dadd(191340.000000,149496.000000,82525.000000,198.251538)}
{pt3dadd(191292.000000,149364.000000,82400.000000,192.382866)}
{pt3dadd(191160.000000,149256.000000,82300.000000,208.506730)}
{pt3dadd(190992.000000,149040.000000,82200.000000,212.322994)}
{pt3dadd(190800.000000,148848.000000,82075.000000,216.740802)}
{pt3dadd(190536.000000,148596.000000,81975.000000,223.211018)}
{pt3dadd(190092.000000,148344.000000,81775.000000,235.873412)}
{pt3dadd(189732.000000,148128.000000,81650.000000,249.658282)}
{pt3dadd(189540.000000,148104.000000,81550.000000,282.326710)}
{pt3dadd(189348.000000,147960.000000,81375.000000,305.014606)}
{pt3dadd(189264.000000,147816.000000,81275.000000,324.359350)}
{pt3dadd(189120.000000,147696.000000,81175.000000,338.144220)}
{pt3dadd(189000.000000,147660.000000,81075.000000,344.671332)}
{pt3dadd(188868.000000,147660.000000,80975.000000,316.210340)}
{pt3dadd(188700.000000,147588.000000,80850.000000,301.012524)}
{pt3dadd(188688.000000,147432.000000,80750.000000,281.667780)}
{pt3dadd(188580.000000,147372.000000,80650.000000,270.377626)}
{pt3dadd(188556.000000,147252.000000,80550.000000,235.630300)}
{pt3dadd(188496.000000,147108.000000,80425.000000,227.606600)}
{pt3dadd(188472.000000,146988.000000,80325.000000,217.853740)}
{pt3dadd(188436.000000,146856.000000,80225.000000,225.343820)}
{pt3dadd(188412.000000,146772.000000,80000.000000,214.002974)}
{pt3dadd(188196.000000,146424.000000,79750.000000,217.637516)}
{pt3dadd(188112.000000,146112.000000,79475.000000,227.923996)}
{pt3dadd(188268.000000,146088.000000,79350.000000,221.761888)}
{pt3dadd(188268.000000,145956.000000,79250.000000,212.009028)}
{pt3dadd(188256.000000,145776.000000,79025.000000,218.479244)}
{pt3dadd(188220.000000,145692.000000,78925.000000,220.433916)}
{pt3dadd(188028.000000,145548.000000,78650.000000,227.923996)}
{pt3dadd(188052.000000,145296.000000,78550.000000,236.348884)}
{pt3dadd(188172.000000,145284.000000,78425.000000,246.101744)}
{pt3dadd(188040.000000,145140.000000,78325.000000,265.446488)}
{pt3dadd(188028.000000,145032.000000,78200.000000,285.045144)}
{pt3dadd(187956.000000,144804.000000,78100.000000,287.795564)}
{pt3dadd(187860.000000,144444.000000,78000.000000,290.171478)}
{pt3dadd(187800.000000,144180.000000,77875.000000,295.809838)}
{pt3dadd(187836.000000,144132.000000,77775.000000,289.593534)}
{pt3dadd(187716.000000,143952.000000,77650.000000,276.465094)}
{pt3dadd(187704.000000,143844.000000,77550.000000,273.714674)}
{pt3dadd(187680.000000,143832.000000,77425.000000,276.209390)}
{pt3dadd(187488.000000,143760.000000,77300.000000,273.321450)}
{pt3dadd(187428.000000,143640.000000,77200.000000,262.568924)}
{pt3dadd(187428.000000,143544.000000,77075.000000,258.151116)}
{pt3dadd(187344.000000,143292.000000,76975.000000,244.190820)}
{pt3dadd(187152.000000,143040.000000,76850.000000,230.895302)}
{pt3dadd(187128.000000,143172.000000,76750.000000,203.767202)}
{pt3dadd(186984.000000,143040.000000,76650.000000,187.643338)}
{pt3dadd(186960.000000,142944.000000,76475.000000,189.798366)}
{pt3dadd(186960.000000,142800.000000,76300.000000,206.509082)}
{pt3dadd(186936.000000,142656.000000,76125.000000,227.974750)}
{pt3dadd(186888.000000,142524.000000,76025.000000,288.794300)}

{create adhoc11}
{access adhoc11}
{connect adhoc11(1), adhoc10(0)}
{nseg = 1}
{strdef color color = "White"}
{pt3dclear()}
{pt3dadd(186888.000000,142524.000000,76025.000000,288.794300)}
{pt3dadd(186936.000000,142416.000000,75850.000000,244.577677)}
{pt3dadd(186708.000000,142200.000000,75675.000000,249.029870)}
{pt3dadd(186492.000000,141948.000000,75500.000000,234.371562)}
{pt3dadd(186708.000000,141900.000000,75400.000000,239.485728)}
{pt3dadd(186660.000000,141732.000000,75200.000000,241.440400)}
{pt3dadd(186504.000000,141108.000000,74875.000000,234.646678)}
{pt3dadd(186444.000000,141036.000000,74675.000000,219.489568)}
{pt3dadd(186228.000000,141012.000000,74575.000000,219.489568)}
{pt3dadd(186144.000000,140952.000000,74500.000000,207.581680)}
{pt3dadd(186108.000000,140820.000000,74400.000000,192.993536)}
{pt3dadd(185928.000000,140712.000000,74225.000000,185.351914)}
{pt3dadd(185844.000000,140604.000000,74050.000000,191.220586)}
{pt3dadd(185712.000000,140364.000000,73875.000000,195.638394)}
{pt3dadd(185736.000000,140244.000000,73700.000000,216.216986)}
{pt3dadd(185832.000000,140184.000000,73600.000000,256.620090)}
{pt3dadd(185544.000000,139920.000000,73400.000000,281.807960)}
{pt3dadd(185532.000000,139884.000000,73200.000000,291.096398)}
{pt3dadd(185400.000000,139704.000000,73025.000000,299.831490)}
{pt3dadd(185448.000000,139548.000000,72925.000000,261.944950)}

{create adhoc12}
{access adhoc12}
{connect adhoc12(1), adhoc11(0)}
{nseg = 1}
{strdef color color = "White"}
{pt3dclear()}
{pt3dadd(185448.000000,139548.000000,72925.000000,261.944950)}
{pt3dadd(185484.000000,138996.000000,73025.000000,163.868488)}
{pt3dadd(185220.000000,138336.000000,73025.000000,159.582613)}
{pt3dadd(184944.000000,138072.000000,72950.000000,137.824383)}
{pt3dadd(184572.000000,137472.000000,72950.000000,160.142743)}
{pt3dadd(184140.000000,136956.000000,72950.000000,181.299800)}
{pt3dadd(183648.000000,136404.000000,73075.000000,237.591800)}

{create adhoc13}
{access adhoc13}
{connect adhoc13(1), adhoc12(0)}
{nseg = 1}
{strdef color color = "White"}
{pt3dclear()}
{pt3dadd(183648.000000,136404.000000,73075.000000,237.591800)}
{pt3dadd(184104.000000,135564.000000,72850.000000,176.901093)}
{pt3dadd(184272.000000,134892.000000,72850.000000,161.679774)}
{pt3dadd(184500.000000,134328.000000,72675.000000,143.333564)}
{pt3dadd(184548.000000,133968.000000,72550.000000,137.631268)}
{pt3dadd(184908.000000,133584.000000,72425.000000,135.171268)}
{pt3dadd(185304.000000,133260.000000,72325.000000,151.295132)}
{pt3dadd(185376.000000,132948.000000,72375.000000,167.257123)}
{pt3dadd(185400.000000,132288.000000,72375.000000,249.471370)}

{create adhoc14}
{access adhoc14}
{connect adhoc14(1), adhoc13(0)}
{nseg = 1}
{strdef color color = "White"}
{pt3dclear()}
{pt3dadd(185400.000000,132288.000000,72375.000000,249.471370)}
{pt3dadd(185052.000000,131832.000000,72525.000000,152.593407)}
{pt3dadd(184884.000000,131364.000000,72725.000000,136.181894)}
{pt3dadd(184812.000000,130992.000000,72850.000000,107.019723)}
{pt3dadd(184812.000000,130680.000000,72925.000000,108.947198)}
{pt3dadd(184776.000000,130536.000000,73000.000000,106.822159)}
{pt3dadd(184800.000000,130440.000000,73225.000000,104.697120)}
{pt3dadd(184680.000000,130272.000000,73400.000000,101.733040)}
{pt3dadd(184608.000000,130008.000000,73550.000000,98.910106)}
{pt3dadd(184608.000000,129636.000000,73650.000000,97.922863)}
{pt3dadd(184440.000000,129444.000000,73625.000000,104.973760)}
{pt3dadd(184320.000000,129204.000000,73625.000000,106.010365)}
{pt3dadd(184164.000000,128892.000000,73600.000000,104.262089)}
{pt3dadd(184044.000000,128556.000000,73600.000000,111.013433)}
{pt3dadd(183972.000000,128340.000000,73600.000000,85.281760)}

{create adhoc15}
{access adhoc15}
{connect adhoc15(1), adhoc13(0)}
{nseg = 1}
{strdef color color = "White"}
{pt3dclear()}
{pt3dadd(185400.000000,132288.000000,72375.000000,249.471370)}
{pt3dadd(185916.000000,132192.000000,72250.000000,155.805865)}
{pt3dadd(186216.000000,132120.000000,72075.000000,135.984330)}
{pt3dadd(186504.000000,132180.000000,71950.000000,127.138200)}
{pt3dadd(186708.000000,132156.000000,71850.000000,137.036857)}
{pt3dadd(186924.000000,132108.000000,71800.000000,138.179715)}
{pt3dadd(187224.000000,132000.000000,71550.000000,139.268149)}
{pt3dadd(187428.000000,131940.000000,71375.000000,143.736046)}
{pt3dadd(187692.000000,131868.000000,71250.000000,129.147902)}
{pt3dadd(188052.000000,131964.000000,71025.000000,124.195237)}
{pt3dadd(188172.000000,131952.000000,70775.000000,132.300000)}

{create adhoc16}
{access adhoc16}
{connect adhoc16(1), adhoc12(0)}
{nseg = 1}
{strdef color color = "White"}
{pt3dclear()}
{pt3dadd(183648.000000,136404.000000,73075.000000,237.591800)}
{pt3dadd(182796.000000,135960.000000,72850.000000,167.502267)}
{pt3dadd(182316.000000,135600.000000,72750.000000,156.718573)}
{pt3dadd(181620.000000,135132.000000,72650.000000,205.240720)}

{create adhoc17}
{access adhoc17}
{connect adhoc17(1), adhoc11(0)}
{nseg = 1}
{strdef color color = "White"}
{pt3dclear()}
{pt3dadd(185448.000000,139548.000000,72925.000000,261.944950)}
{pt3dadd(185424.000000,139392.000000,72725.000000,189.417517)}
{pt3dadd(185376.000000,139404.000000,72625.000000,172.064270)}
{pt3dadd(185256.000000,139380.000000,72500.000000,150.306040)}
{pt3dadd(185256.000000,139416.000000,72400.000000,138.479908)}
{pt3dadd(185232.000000,139404.000000,72300.000000,126.653776)}
{pt3dadd(185184.000000,139392.000000,72175.000000,120.023016)}
{pt3dadd(185208.000000,139440.000000,72075.000000,111.044644)}
{pt3dadd(185172.000000,139320.000000,71975.000000,99.218512)}
{pt3dadd(185148.000000,139332.000000,71875.000000,101.145987)}
{pt3dadd(185124.000000,139368.000000,71750.000000,112.972119)}
{pt3dadd(185160.000000,139344.000000,71650.000000,121.134415)}
{pt3dadd(185232.000000,139368.000000,71525.000000,136.100197)}
{pt3dadd(185196.000000,139284.000000,71425.000000,160.396121)}
{pt3dadd(185184.000000,139140.000000,71300.000000,173.434428)}
{pt3dadd(185232.000000,139200.000000,71175.000000,178.262598)}
{pt3dadd(185256.000000,139200.000000,71050.000000,198.489292)}
{pt3dadd(185196.000000,139104.000000,70975.000000,217.107872)}
{pt3dadd(185340.000000,139056.000000,70875.000000,229.015760)}
{pt3dadd(185244.000000,138852.000000,70750.000000,253.004210)}
{pt3dadd(185256.000000,138900.000000,70625.000000,272.553720)}
{pt3dadd(185460.000000,138900.000000,70525.000000,261.212874)}
{pt3dadd(185568.000000,139092.000000,70300.000000,247.917356)}
{pt3dadd(185616.000000,139200.000000,70200.000000,240.427276)}
{pt3dadd(185616.000000,139116.000000,70100.000000,232.562690)}
{pt3dadd(185652.000000,139152.000000,69975.000000,222.809830)}
{pt3dadd(185688.000000,139188.000000,69875.000000,217.220616)}
{pt3dadd(185676.000000,139092.000000,69775.000000,215.359024)}
{pt3dadd(185664.000000,138984.000000,69675.000000,210.941216)}
{pt3dadd(185580.000000,138972.000000,69575.000000,198.278822)}
{pt3dadd(185448.000000,138864.000000,69375.000000,186.793652)}
{pt3dadd(185340.000000,138684.000000,69275.000000,185.105132)}
{pt3dadd(185364.000000,138804.000000,69100.000000,180.035548)}
{pt3dadd(185436.000000,138852.000000,69000.000000,167.565756)}
{pt3dadd(185268.000000,138816.000000,68900.000000,152.102584)}
{pt3dadd(185208.000000,138804.000000,68800.000000,143.532174)}
{pt3dadd(185100.000000,138780.000000,68625.000000,136.221764)}
{pt3dadd(184956.000000,138720.000000,68450.000000,131.842468)}
{pt3dadd(184788.000000,138588.000000,68275.000000,131.842468)}
{pt3dadd(184764.000000,138552.000000,68200.000000,147.305640)}
{pt3dadd(184668.000000,138528.000000,68025.000000,157.564570)}
{pt3dadd(184536.000000,138456.000000,67825.000000,166.563500)}
{pt3dadd(184416.000000,138324.000000,67725.000000,176.012380)}
{pt3dadd(184464.000000,138360.000000,67625.000000,179.152030)}
{pt3dadd(184368.000000,138348.000000,67500.000000,167.120150)}
{pt3dadd(184332.000000,138324.000000,67400.000000,153.429928)}
{pt3dadd(184404.000000,138420.000000,67300.000000,144.430998)}
{pt3dadd(184272.000000,138408.000000,67125.000000,133.659118)}
{pt3dadd(184188.000000,138492.000000,66950.000000,127.671708)}
{pt3dadd(184176.000000,138552.000000,66775.000000,130.254708)}
{pt3dadd(184212.000000,138516.000000,66675.000000,137.658150)}
{pt3dadd(184188.000000,138444.000000,66500.000000,132.966858)}
{pt3dadd(184032.000000,138468.000000,66400.000000,128.275566)}
{pt3dadd(183960.000000,138468.000000,66225.000000,126.952566)}
{pt3dadd(183828.000000,139044.000000,66000.000000,122.026708)}
{pt3dadd(183816.000000,139128.000000,65825.000000,119.314558)}
{pt3dadd(183732.000000,139032.000000,65725.000000,126.718000)}
{pt3dadd(183552.000000,138984.000000,65650.000000,135.580052)}
{pt3dadd(183480.000000,139044.000000,65575.000000,139.750812)}
{pt3dadd(183444.000000,139068.000000,65400.000000,147.524430)}
{pt3dadd(183348.000000,139068.000000,65300.000000,154.834840)}
{pt3dadd(183288.000000,139080.000000,65200.000000,162.894570)}
{pt3dadd(183132.000000,139080.000000,65000.000000,158.723810)}
{pt3dadd(182892.000000,139176.000000,64875.000000,150.950192)}
{pt3dadd(182652.000000,139152.000000,64775.000000,148.102432)}
{pt3dadd(182556.000000,139128.000000,64650.000000,135.064125)}
{pt3dadd(182088.000000,139092.000000,64425.000000,124.292245)}
{pt3dadd(181908.000000,139092.000000,64325.000000,125.615245)}
{pt3dadd(181452.000000,138924.000000,64125.000000,133.388863)}
{pt3dadd(181128.000000,138792.000000,64025.000000,132.065863)}
{pt3dadd(180516.000000,138588.000000,63925.000000,137.793760)}
{pt3dadd(179880.000000,138372.000000,63800.000000,154.434312)}
{pt3dadd(179172.000000,137964.000000,63825.000000,163.883192)}
{pt3dadd(178596.000000,137712.000000,63600.000000,168.711362)}
{pt3dadd(178284.000000,137604.000000,63500.000000,174.413658)}
{pt3dadd(178260.000000,137532.000000,63400.000000,193.209238)}
{pt3dadd(177936.000000,137400.000000,63200.000000,185.567616)}
{pt3dadd(177780.000000,137172.000000,63075.000000,174.795736)}
{pt3dadd(177612.000000,136980.000000,62975.000000,184.592386)}
{pt3dadd(177444.000000,136776.000000,62875.000000,193.478234)}
{pt3dadd(177252.000000,136332.000000,62675.000000,203.231094)}
{pt3dadd(177228.000000,136176.000000,62575.000000,235.520273)}
{pt3dadd(177312.000000,136200.000000,62375.000000,275.042200)}

{create adhoc18}
{access adhoc18}
{connect adhoc18(1), adhoc10(0)}
{nseg = 1}
{strdef color color = "White"}
{pt3dclear()}
{pt3dadd(186888.000000,142524.000000,76025.000000,288.794300)}
{pt3dadd(186876.000000,141624.000000,75950.000000,215.024380)}
{pt3dadd(186732.000000,141144.000000,75950.000000,179.654770)}
{pt3dadd(186564.000000,140580.000000,76100.000000,138.004063)}
{pt3dadd(186396.000000,140208.000000,76175.000000,138.915000)}

{create adhoc19}
{access adhoc19}
{connect adhoc19(1), adhoc9(0)}
{nseg = 1}
{strdef color color = "White"}
{pt3dclear()}
{pt3dadd(193440.000000,152412.000000,86450.000000,249.471370)}
{pt3dadd(193488.000000,150888.000000,86025.000000,142.925423)}
{pt3dadd(193620.000000,150372.000000,85825.000000,130.487357)}
{pt3dadd(193704.000000,149448.000000,85700.000000,105.793083)}
{pt3dadd(193704.000000,148788.000000,85575.000000,124.195661)}
{pt3dadd(193428.000000,148056.000000,85550.000000,155.285307)}
{pt3dadd(193260.000000,147420.000000,85775.000000,160.457457)}
{pt3dadd(192900.000000,146856.000000,85975.000000,190.875590)}
{pt3dadd(192732.000000,146028.000000,85450.000000,145.860750)}

{create adhoc20}
{access adhoc20}
{connect adhoc20(1), adhoc8(0)}
{nseg = 1}
{strdef color color = "White"}
{pt3dclear()}
{pt3dadd(190680.000000,187704.000000,102425.000000,470.415500)}
{pt3dadd(190632.000000,187584.000000,102950.000000,465.137047)}
{pt3dadd(190416.000000,187788.000000,103175.000000,486.535452)}
{pt3dadd(190392.000000,188088.000000,103400.000000,473.724868)}
{pt3dadd(190140.000000,188196.000000,103525.000000,459.601210)}
{pt3dadd(190152.000000,188460.000000,103650.000000,459.601210)}
{pt3dadd(190188.000000,188520.000000,103775.000000,433.276998)}
{pt3dadd(190044.000000,188460.000000,103875.000000,399.756642)}
{pt3dadd(190032.000000,188364.000000,104000.000000,399.756642)}
{pt3dadd(190092.000000,188376.000000,104100.000000,373.832832)}
{pt3dadd(189924.000000,188436.000000,104225.000000,356.239460)}
{pt3dadd(189864.000000,188520.000000,104325.000000,360.109576)}
{pt3dadd(189852.000000,188532.000000,104450.000000,367.305720)}
{pt3dadd(189780.000000,188556.000000,104675.000000,367.305720)}
{pt3dadd(189720.000000,188628.000000,104800.000000,381.028976)}
{pt3dadd(189696.000000,188664.000000,104925.000000,387.556088)}
{pt3dadd(189528.000000,188664.000000,105075.000000,373.146676)}
{pt3dadd(189480.000000,188760.000000,105200.000000,381.080422)}
{pt3dadd(189492.000000,188808.000000,105325.000000,381.080422)}
{pt3dadd(189564.000000,188868.000000,105500.000000,377.394594)}
{pt3dadd(189564.000000,188964.000000,105550.000000,396.791292)}
{pt3dadd(189480.000000,189024.000000,105800.000000,407.330588)}
{pt3dadd(189396.000000,189204.000000,105925.000000,411.597396)}
{pt3dadd(189360.000000,189372.000000,106075.000000,434.051492)}
{pt3dadd(189408.000000,189324.000000,106200.000000,454.418020)}
{pt3dadd(189564.000000,189156.000000,106300.000000,450.151212)}
{pt3dadd(189360.000000,188988.000000,106450.000000,446.465384)}
{pt3dadd(189264.000000,189036.000000,106575.000000,423.725534)}
{pt3dadd(189312.000000,189048.000000,106700.000000,383.678066)}
{pt3dadd(189156.000000,188940.000000,106825.000000,359.801222)}
{pt3dadd(189240.000000,189252.000000,107100.000000,359.801222)}
{pt3dadd(189216.000000,189264.000000,107225.000000,363.487050)}
{pt3dadd(189012.000000,189180.000000,107350.000000,374.026346)}
{pt3dadd(189012.000000,189240.000000,107575.000000,387.749602)}
{pt3dadd(189192.000000,189192.000000,107700.000000,391.259918)}
{pt3dadd(189048.000000,189264.000000,107825.000000,355.818046)}
{pt3dadd(189012.000000,189240.000000,107950.000000,319.463790)}
{pt3dadd(189048.000000,189336.000000,108175.000000,281.154862)}
{pt3dadd(188964.000000,189336.000000,108400.000000,251.270822)}
{pt3dadd(188904.000000,189372.000000,108525.000000,225.072610)}
{pt3dadd(188940.000000,189360.000000,108675.000000,225.072610)}
{pt3dadd(188976.000000,189312.000000,108900.000000,223.117938)}
{pt3dadd(188796.000000,189336.000000,109025.000000,233.918740)}
{pt3dadd(188736.000000,189444.000000,109275.000000,229.500932)}
{pt3dadd(188724.000000,189396.000000,109500.000000,229.500932)}
{pt3dadd(188496.000000,189336.000000,109750.000000,240.253458)}
{pt3dadd(188472.000000,189300.000000,110275.000000,256.168426)}
{pt3dadd(188496.000000,189384.000000,110400.000000,269.953296)}
{pt3dadd(188388.000000,189396.000000,110750.000000,293.715848)}
{pt3dadd(188376.000000,189264.000000,111000.000000,298.586478)}
{pt3dadd(188352.000000,189360.000000,111250.000000,292.948118)}
{pt3dadd(188220.000000,189528.000000,111500.000000,290.328668)}
{pt3dadd(188208.000000,189612.000000,111825.000000,287.296324)}
{pt3dadd(188184.000000,189444.000000,112050.000000,287.296324)}
{pt3dadd(187836.000000,189552.000000,112425.000000,301.770438)}
{pt3dadd(187788.000000,189528.000000,112650.000000,324.164398)}
{pt3dadd(187632.000000,189444.000000,113050.000000,341.981664)}
{pt3dadd(187560.000000,189672.000000,113375.000000,351.541120)}
{pt3dadd(187284.000000,189468.000000,113725.000000,354.884272)}
{pt3dadd(187056.000000,189504.000000,114025.000000,354.884272)}
{pt3dadd(186840.000000,189480.000000,114325.000000,358.754388)}
{pt3dadd(186444.000000,189372.000000,114775.000000,358.754388)}
{pt3dadd(186120.000000,189336.000000,115025.000000,358.754388)}
{pt3dadd(185640.000000,189204.000000,115375.000000,346.306992)}
{pt3dadd(185124.000000,189084.000000,115600.000000,346.306992)}
{pt3dadd(184596.000000,189120.000000,115875.000000,304.127948)}
{pt3dadd(184332.000000,189168.000000,116000.000000,274.969836)}
{pt3dadd(184308.000000,189264.000000,116200.000000,262.522440)}
{pt3dadd(184128.000000,189264.000000,116375.000000,262.522440)}
{pt3dadd(183828.000000,189132.000000,116750.000000,250.667776)}
{pt3dadd(183540.000000,189348.000000,116925.000000,250.667776)}
{pt3dadd(183192.000000,189420.000000,117300.000000,267.378492)}
{pt3dadd(182880.000000,189600.000000,117675.000000,276.482736)}
{pt3dadd(182520.000000,189588.000000,118000.000000,288.930132)}
{pt3dadd(182220.000000,189696.000000,118250.000000,315.194208)}
{pt3dadd(181944.000000,189792.000000,118450.000000,336.747536)}
{pt3dadd(181488.000000,189972.000000,118775.000000,336.747536)}
{pt3dadd(181068.000000,190080.000000,119000.000000,322.273422)}
{pt3dadd(180312.000000,189828.000000,119275.000000,322.273422)}
{pt3dadd(179940.000000,189684.000000,119425.000000,284.101458)}
{pt3dadd(179892.000000,189744.000000,119525.000000,284.101458)}
{pt3dadd(179808.000000,189648.000000,119675.000000,284.101458)}
{pt3dadd(178968.000000,189336.000000,119975.000000,292.359268)}
{pt3dadd(178632.000000,189288.000000,120225.000000,289.016116)}
{pt3dadd(178452.000000,189264.000000,120575.000000,312.778668)}
{pt3dadd(177480.000000,189216.000000,120900.000000,285.902278)}
{pt3dadd(176940.000000,189120.000000,121150.000000,295.006522)}
{pt3dadd(175920.000000,188832.000000,121550.000000,289.368162)}
{pt3dadd(175512.000000,188196.000000,121775.000000,299.907458)}
{pt3dadd(175260.000000,188160.000000,121900.000000,299.907458)}
{pt3dadd(174732.000000,187980.000000,122275.000000,326.783848)}
{pt3dadd(174372.000000,187944.000000,122575.000000,323.599888)}
{pt3dadd(174024.000000,188004.000000,122900.000000,329.238248)}
{pt3dadd(173436.000000,187980.000000,123175.000000,333.108364)}
{pt3dadd(173304.000000,187980.000000,123300.000000,333.108364)}
{pt3dadd(172128.000000,187836.000000,123750.000000,342.667820)}
{pt3dadd(171696.000000,187632.000000,123950.000000,342.667820)}
{pt3dadd(171372.000000,187572.000000,124175.000000,380.808276)}
{pt3dadd(170760.000000,187500.000000,124450.000000,369.742016)}
{pt3dadd(170148.000000,187392.000000,124625.000000,366.558056)}
{pt3dadd(169656.000000,187308.000000,124825.000000,333.583680)}
{pt3dadd(169020.000000,187524.000000,125150.000000,315.160116)}
{pt3dadd(168612.000000,187752.000000,125550.000000,251.831790)}
{pt3dadd(168396.000000,187956.000000,125875.000000,248.488638)}
{pt3dadd(167820.000000,187944.000000,126250.000000,237.198484)}
{pt3dadd(167724.000000,188064.000000,126400.000000,257.725464)}
{pt3dadd(167352.000000,188604.000000,126675.000000,289.872284)}
{pt3dadd(167052.000000,188592.000000,126900.000000,331.815754)}
{pt3dadd(166524.000000,188496.000000,127050.000000,350.288796)}
{pt3dadd(166236.000000,188484.000000,127275.000000,383.235952)}
{pt3dadd(165492.000000,188580.000000,127625.000000,410.813238)}
{pt3dadd(164664.000000,188832.000000,127900.000000,365.573134)}
{pt3dadd(163680.000000,188868.000000,128175.000000,358.376990)}
{pt3dadd(162612.000000,188820.000000,128400.000000,343.247100)}
{pt3dadd(161616.000000,188988.000000,128775.000000,315.669814)}
{pt3dadd(160692.000000,189216.000000,129050.000000,282.722658)}
{pt3dadd(160212.000000,189276.000000,129275.000000,317.423466)}
{pt3dadd(159204.000000,189144.000000,129575.000000,324.619610)}
{pt3dadd(158316.000000,189204.000000,129800.000000,315.060154)}
{pt3dadd(157800.000000,189120.000000,130000.000000,320.980438)}
{pt3dadd(157404.000000,189192.000000,130175.000000,318.485722)}
{pt3dadd(157260.000000,189300.000000,130275.000000,296.878198)}
{pt3dadd(156876.000000,189156.000000,130475.000000,283.154942)}
{pt3dadd(156564.000000,189156.000000,130575.000000,277.516582)}
{pt3dadd(156024.000000,189000.000000,130700.000000,277.516582)}
{pt3dadd(155664.000000,189144.000000,130925.000000,266.715780)}
{pt3dadd(155040.000000,189000.000000,131150.000000,271.354474)}
{pt3dadd(154704.000000,189060.000000,131325.000000,257.569604)}
{pt3dadd(154332.000000,189036.000000,131500.000000,241.654636)}
{pt3dadd(153852.000000,188976.000000,131625.000000,213.434422)}
{pt3dadd(153204.000000,188868.000000,131825.000000,213.434422)}
{pt3dadd(152688.000000,188640.000000,132000.000000,200.772028)}
{pt3dadd(152316.000000,188616.000000,132200.000000,188.109634)}
{pt3dadd(152172.000000,188712.000000,132400.000000,196.534522)}
{pt3dadd(151920.000000,188736.000000,132575.000000,202.123736)}
{pt3dadd(151548.000000,188700.000000,132675.000000,208.285844)}
{pt3dadd(151296.000000,188628.000000,132900.000000,212.102108)}
{pt3dadd(151032.000000,188412.000000,133100.000000,222.388588)}
{pt3dadd(150804.000000,188364.000000,133200.000000,229.878668)}
{pt3dadd(150636.000000,188268.000000,133400.000000,246.589384)}
{pt3dadd(150300.000000,188256.000000,133525.000000,265.012948)}
{pt3dadd(150168.000000,188268.000000,133800.000000,290.827908)}
{pt3dadd(149940.000000,188292.000000,134025.000000,310.172652)}
{pt3dadd(149832.000000,188328.000000,134225.000000,307.553202)}
{pt3dadd(149376.000000,188220.000000,134450.000000,304.802782)}
{pt3dadd(149064.000000,188364.000000,134650.000000,298.882498)}
{pt3dadd(149052.000000,188328.000000,134850.000000,302.225650)}
{pt3dadd(148440.000000,187980.000000,135125.000000,320.698692)}
{pt3dadd(147840.000000,188424.000000,135350.000000,353.645848)}
{pt3dadd(146772.000000,188280.000000,135825.000000,368.843664)}
{pt3dadd(146220.000000,188220.000000,136050.000000,354.185356)}
{pt3dadd(145500.000000,189504.000000,136350.000000,350.842204)}
{pt3dadd(145332.000000,187992.000000,136850.000000,335.712314)}
{pt3dadd(145020.000000,187932.000000,137175.000000,302.765158)}
{pt3dadd(144780.000000,187884.000000,137625.000000,290.317762)}
{pt3dadd(144888.000000,187680.000000,138025.000000,307.864010)}
{pt3dadd(144588.000000,187596.000000,138325.000000,298.759766)}
{pt3dadd(144204.000000,187464.000000,138775.000000,264.012440)}
{pt3dadd(143556.000000,187356.000000,139325.000000,238.083450)}
{pt3dadd(142572.000000,186888.000000,139975.000000,225.580170)}
{pt3dadd(142164.000000,186720.000000,140200.000000,194.105520)}
{pt3dadd(141840.000000,186684.000000,140650.000000,183.865020)}
{pt3dadd(141492.000000,186780.000000,141000.000000,195.924450)}
{pt3dadd(141060.000000,186684.000000,141375.000000,233.143594)}
{pt3dadd(140820.000000,186540.000000,141650.000000,273.224160)}
{pt3dadd(140424.000000,186480.000000,141875.000000,338.135110)}
{pt3dadd(140100.000000,186384.000000,142150.000000,368.019150)}
{pt3dadd(139884.000000,186252.000000,142350.000000,384.179934)}
{pt3dadd(139068.000000,186048.000000,143125.000000,363.601342)}
{pt3dadd(138660.000000,185868.000000,143600.000000,308.895956)}
{pt3dadd(138360.000000,185604.000000,143825.000000,246.975152)}
{pt3dadd(138084.000000,185352.000000,144050.000000,198.744902)}
{pt3dadd(137964.000000,185172.000000,144275.000000,174.159230)}
{pt3dadd(137676.000000,185124.000000,144675.000000,172.106822)}
{pt3dadd(137616.000000,184908.000000,145050.000000,178.707942)}
{pt3dadd(137268.000000,184944.000000,145550.000000,204.304506)}
{pt3dadd(137052.000000,184800.000000,145925.000000,212.364236)}
{pt3dadd(136932.000000,184536.000000,146200.000000,218.526344)}
{pt3dadd(136908.000000,184524.000000,146850.000000,214.710080)}
{pt3dadd(137100.000000,184428.000000,147150.000000,229.867190)}
{pt3dadd(136932.000000,184452.000000,147350.000000,224.497320)}
{pt3dadd(136884.000000,184644.000000,148000.000000,257.471696)}
{pt3dadd(136776.000000,184572.000000,148525.000000,293.488632)}
{pt3dadd(136656.000000,184452.000000,149200.000000,323.119856)}
{pt3dadd(136632.000000,184464.000000,149500.000000,363.903127)}
{pt3dadd(136536.000000,184512.000000,149800.000000,334.315520)}

{create adhoc21}
{access adhoc21}
{connect adhoc21(1), adhoc20(0)}
{nseg = 1}
{strdef color color = "White"}
{pt3dclear()}
{pt3dadd(136536.000000,184512.000000,149800.000000,334.315520)}
{pt3dadd(136404.000000,184536.000000,149925.000000,322.318667)}
{pt3dadd(136200.000000,184416.000000,150200.000000,330.786916)}
{pt3dadd(135888.000000,184392.000000,150325.000000,341.326212)}
{pt3dadd(135672.000000,184488.000000,150475.000000,312.442686)}
{pt3dadd(135468.000000,184356.000000,150600.000000,334.050210)}
{pt3dadd(135180.000000,184272.000000,150725.000000,322.760056)}
{pt3dadd(134880.000000,184344.000000,150850.000000,292.144036)}
{pt3dadd(134400.000000,184332.000000,150975.000000,255.789780)}
{pt3dadd(134040.000000,184440.000000,151100.000000,240.632670)}
{pt3dadd(133752.000000,184476.000000,151225.000000,237.448710)}
{pt3dadd(133524.000000,184524.000000,151450.000000,258.776292)}
{pt3dadd(133212.000000,184788.000000,151600.000000,270.684180)}
{pt3dadd(132924.000000,184896.000000,151725.000000,307.038436)}
{pt3dadd(132636.000000,184992.000000,151925.000000,347.208956)}
{pt3dadd(132312.000000,184968.000000,152150.000000,333.424086)}
{pt3dadd(131880.000000,184980.000000,152400.000000,288.879664)}
{pt3dadd(131400.000000,184836.000000,152525.000000,260.331224)}
{pt3dadd(131124.000000,184668.000000,152700.000000,223.976968)}
{pt3dadd(130764.000000,184584.000000,152850.000000,191.830148)}
{pt3dadd(130548.000000,184656.000000,153000.000000,185.036426)}
{pt3dadd(130440.000000,184680.000000,153150.000000,196.912420)}
{pt3dadd(130416.000000,184836.000000,153300.000000,215.708000)}
{pt3dadd(130152.000000,184536.000000,153475.000000,224.554130)}
{pt3dadd(130020.000000,184620.000000,153625.000000,231.687540)}
{pt3dadd(129732.000000,184668.000000,153775.000000,236.105348)}
{pt3dadd(129120.000000,184560.000000,153925.000000,242.575564)}
{pt3dadd(128964.000000,184980.000000,154075.000000,244.838344)}
{pt3dadd(128736.000000,185232.000000,154225.000000,255.590870)}
{pt3dadd(128568.000000,184644.000000,154375.000000,238.660810)}
{pt3dadd(128364.000000,184392.000000,154550.000000,234.243002)}
{pt3dadd(127908.000000,184380.000000,154700.000000,234.243002)}
{pt3dadd(127680.000000,184008.000000,154850.000000,241.733082)}
{pt3dadd(127416.000000,183888.000000,155000.000000,233.475272)}
{pt3dadd(127152.000000,183624.000000,155125.000000,241.116894)}
{pt3dadd(126852.000000,183468.000000,155275.000000,255.775202)}
{pt3dadd(126408.000000,183132.000000,155425.000000,281.973414)}
{pt3dadd(125772.000000,182700.000000,155575.000000,290.644118)}
{pt3dadd(125640.000000,182604.000000,155450.000000,288.149402)}
{pt3dadd(125496.000000,182508.000000,155575.000000,286.096994)}
{pt3dadd(125376.000000,182544.000000,155575.000000,278.232408)}
{pt3dadd(125040.000000,182364.000000,155650.000000,247.616388)}
{pt3dadd(124740.000000,182160.000000,155700.000000,227.037796)}
{pt3dadd(124452.000000,182028.000000,155800.000000,227.037796)}
{pt3dadd(124200.000000,181788.000000,155825.000000,233.508012)}
{pt3dadd(123936.000000,181704.000000,155950.000000,226.714290)}
{pt3dadd(123648.000000,181452.000000,156050.000000,222.707210)}
{pt3dadd(123348.000000,181284.000000,156075.000000,213.377068)}
{pt3dadd(123168.000000,181116.000000,156200.000000,194.113554)}
{pt3dadd(122904.000000,180972.000000,156275.000000,182.054124)}
{pt3dadd(122676.000000,180744.000000,156350.000000,178.047044)}
{pt3dadd(122424.000000,180528.000000,156500.000000,176.185452)}
{pt3dadd(122220.000000,180444.000000,156425.000000,181.508514)}
{pt3dadd(122004.000000,180408.000000,156575.000000,191.925898)}
{pt3dadd(121824.000000,180312.000000,156700.000000,188.629264)}
{pt3dadd(121500.000000,180288.000000,156700.000000,184.994722)}
{pt3dadd(121164.000000,180240.000000,156675.000000,190.863394)}
{pt3dadd(120564.000000,180216.000000,156600.000000,194.870474)}
{pt3dadd(120420.000000,180264.000000,156650.000000,194.870474)}
{pt3dadd(120276.000000,180216.000000,156525.000000,201.801650)}
{pt3dadd(120144.000000,180324.000000,156500.000000,221.351160)}
{pt3dadd(120024.000000,180348.000000,156500.000000,233.259048)}
{pt3dadd(119868.000000,180300.000000,156500.000000,247.917356)}
{pt3dadd(119748.000000,180324.000000,156400.000000,280.585784)}
{pt3dadd(119640.000000,180348.000000,156425.000000,315.208884)}
{pt3dadd(119496.000000,180336.000000,156475.000000,333.917016)}
{pt3dadd(119400.000000,180372.000000,156425.000000,372.991676)}
{pt3dadd(119280.000000,180180.000000,156425.000000,404.835770)}
{pt3dadd(119148.000000,180156.000000,156475.000000,425.202298)}
{pt3dadd(119004.000000,180168.000000,156450.000000,445.568826)}
{pt3dadd(118884.000000,180060.000000,156450.000000,480.765206)}
{pt3dadd(118752.000000,180156.000000,156575.000000,490.408718)}
{pt3dadd(118620.000000,180120.000000,156525.000000,520.882284)}
{pt3dadd(118476.000000,180156.000000,156525.000000,530.525796)}
{pt3dadd(118368.000000,180132.000000,156425.000000,530.525796)}
{pt3dadd(118248.000000,180120.000000,156525.000000,511.215798)}
{pt3dadd(118140.000000,180216.000000,156525.000000,484.891586)}
{pt3dadd(118008.000000,180132.000000,156575.000000,435.021322)}
{pt3dadd(117900.000000,180144.000000,156650.000000,394.973854)}
{pt3dadd(117732.000000,180048.000000,156575.000000,353.279744)}
{pt3dadd(117564.000000,179952.000000,156650.000000,330.539894)}
{pt3dadd(117384.000000,179940.000000,156675.000000,310.896354)}
{pt3dadd(117240.000000,180000.000000,156725.000000,283.790650)}
{pt3dadd(117120.000000,180048.000000,156750.000000,263.212058)}
{pt3dadd(117024.000000,180108.000000,156800.000000,253.923620)}
{pt3dadd(116904.000000,180024.000000,156750.000000,232.316096)}
{pt3dadd(116772.000000,180024.000000,156775.000000,219.812816)}
{pt3dadd(116652.000000,180012.000000,156775.000000,215.805736)}
{pt3dadd(116520.000000,180000.000000,156775.000000,215.805736)}
{pt3dadd(116316.000000,180012.000000,156750.000000,225.094174)}
{pt3dadd(116220.000000,180036.000000,156750.000000,222.939146)}
{pt3dadd(116124.000000,180024.000000,156725.000000,222.939146)}
{pt3dadd(115992.000000,180012.000000,156750.000000,236.234664)}
{pt3dadd(115872.000000,180084.000000,156750.000000,238.389692)}
{pt3dadd(115752.000000,180096.000000,156750.000000,235.894976)}
{pt3dadd(115632.000000,180156.000000,156725.000000,242.688698)}
{pt3dadd(115524.000000,180180.000000,156750.000000,244.951478)}
{pt3dadd(115392.000000,180252.000000,156900.000000,250.321348)}
{pt3dadd(115272.000000,180180.000000,157000.000000,262.824628)}
{pt3dadd(115152.000000,180120.000000,156950.000000,262.824628)}
{pt3dadd(115044.000000,180216.000000,156975.000000,253.978498)}
{pt3dadd(114912.000000,180216.000000,157100.000000,251.715718)}
{pt3dadd(114792.000000,180288.000000,157150.000000,251.715718)}
{pt3dadd(114624.000000,180492.000000,157250.000000,254.603658)}
{pt3dadd(114504.000000,180480.000000,157350.000000,282.111784)}
{pt3dadd(114132.000000,180684.000000,157475.000000,326.399786)}
{pt3dadd(113856.000000,180888.000000,157600.000000,351.350462)}
{pt3dadd(113832.000000,180948.000000,157700.000000,357.270746)}
{pt3dadd(113940.000000,181116.000000,157800.000000,377.896462)}
{pt3dadd(113880.000000,181104.000000,157900.000000,361.140862)}
{pt3dadd(113664.000000,181116.000000,158000.000000,313.036596)}
{pt3dadd(113472.000000,181188.000000,158200.000000,278.289270)}
{pt3dadd(113028.000000,181296.000000,158300.000000,245.240886)}
{pt3dadd(112536.000000,181440.000000,158425.000000,194.599130)}
{pt3dadd(112080.000000,181536.000000,158500.000000,169.411260)}
{pt3dadd(111708.000000,181692.000000,158600.000000,169.411260)}
{pt3dadd(111372.000000,181860.000000,158725.000000,163.124480)}
{pt3dadd(111204.000000,181980.000000,158850.000000,164.656016)}
{pt3dadd(110724.000000,182172.000000,158950.000000,171.257136)}
{pt3dadd(110196.000000,182280.000000,159050.000000,176.846350)}
{pt3dadd(109716.000000,182496.000000,159150.000000,184.870050)}
{pt3dadd(109308.000000,182568.000000,159275.000000,205.592174)}
{pt3dadd(108852.000000,182904.000000,159375.000000,220.948238)}
{pt3dadd(108576.000000,182880.000000,159475.000000,226.816910)}
{pt3dadd(108648.000000,182916.000000,159600.000000,231.024346)}
{pt3dadd(108192.000000,183024.000000,159700.000000,233.287126)}
{pt3dadd(107784.000000,183096.000000,159800.000000,226.493404)}
{pt3dadd(107580.000000,183084.000000,159875.000000,239.621844)}
{pt3dadd(107472.000000,183060.000000,160075.000000,251.529732)}
{pt3dadd(107016.000000,183060.000000,160175.000000,264.033012)}
{pt3dadd(106668.000000,182964.000000,160300.000000,277.161452)}
{pt3dadd(106056.000000,183252.000000,160500.000000,291.819760)}
{pt3dadd(105276.000000,183420.000000,160625.000000,301.379216)}
{pt3dadd(104940.000000,183600.000000,160725.000000,316.577032)}
{pt3dadd(105012.000000,183588.000000,160850.000000,313.826612)}
{pt3dadd(104868.000000,183600.000000,160975.000000,310.938672)}
{pt3dadd(104520.000000,183516.000000,161175.000000,316.858956)}
{pt3dadd(103992.000000,183516.000000,161275.000000,304.411560)}
{pt3dadd(103536.000000,183552.000000,161400.000000,281.723664)}
{pt3dadd(103092.000000,183528.000000,161525.000000,265.808696)}
{pt3dadd(102564.000000,183636.000000,161625.000000,245.281716)}
{pt3dadd(102132.000000,183828.000000,161850.000000,245.281716)}
{pt3dadd(101652.000000,183936.000000,161950.000000,235.041216)}
{pt3dadd(101040.000000,184032.000000,162075.000000,261.239428)}
{pt3dadd(100140.000000,184176.000000,162175.000000,289.009060)}
{pt3dadd(99768.000000,184356.000000,162375.000000,321.983436)}
{pt3dadd(98928.000000,184428.000000,162575.000000,321.983436)}
{pt3dadd(98088.000000,184476.000000,162700.000000,335.111876)}
{pt3dadd(97476.000000,184692.000000,162500.000000,319.154164)}
{pt3dadd(97248.000000,184800.000000,162525.000000,307.299500)}
{pt3dadd(97128.000000,184752.000000,162475.000000,297.740044)}
{pt3dadd(96984.000000,184848.000000,162600.000000,283.955174)}
{pt3dadd(96876.000000,184788.000000,162550.000000,281.067234)}
{pt3dadd(96672.000000,184836.000000,162550.000000,293.514630)}
{pt3dadd(96564.000000,184812.000000,162425.000000,312.222762)}
{pt3dadd(96456.000000,184812.000000,162475.000000,332.848478)}
{pt3dadd(96276.000000,184860.000000,162500.000000,353.160460)}
{pt3dadd(96156.000000,184836.000000,162500.000000,356.048400)}
{pt3dadd(96036.000000,184812.000000,162475.000000,346.488944)}
{pt3dadd(95916.000000,184884.000000,162550.000000,350.174772)}
{pt3dadd(95808.000000,184944.000000,162525.000000,350.174772)}
{pt3dadd(95688.000000,184992.000000,162675.000000,353.685088)}
{pt3dadd(95508.000000,185088.000000,162475.000000,350.797148)}
{pt3dadd(95388.000000,185064.000000,162550.000000,371.422864)}
{pt3dadd(95280.000000,185148.000000,162525.000000,371.422864)}
{pt3dadd(95172.000000,185112.000000,162575.000000,357.013452)}
{pt3dadd(95064.000000,185172.000000,162650.000000,350.159984)}
{pt3dadd(94968.000000,185148.000000,162700.000000,369.803524)}
{pt3dadd(94860.000000,185148.000000,162725.000000,373.867154)}
{pt3dadd(94740.000000,185184.000000,162700.000000,381.800900)}
{pt3dadd(94620.000000,185208.000000,162625.000000,400.273942)}
{pt3dadd(94512.000000,185220.000000,162600.000000,418.746984)}
{pt3dadd(94428.000000,185280.000000,162575.000000,426.680730)}
{pt3dadd(94320.000000,185400.000000,162600.000000,411.550840)}
{pt3dadd(94200.000000,185448.000000,162625.000000,389.893838)}
{pt3dadd(94092.000000,185424.000000,162625.000000,389.893838)}
{pt3dadd(93984.000000,185364.000000,162600.000000,408.284304)}
{pt3dadd(93876.000000,185460.000000,162550.000000,408.284304)}
{pt3dadd(93756.000000,185484.000000,162550.000000,452.436642)}
{pt3dadd(93636.000000,185520.000000,162550.000000,487.544754)}
{pt3dadd(93528.000000,185580.000000,162575.000000,500.995864)}
{pt3dadd(93420.000000,185604.000000,162575.000000,491.352352)}
{pt3dadd(93300.000000,185628.000000,162575.000000,495.619160)}
{pt3dadd(93180.000000,185628.000000,162575.000000,466.596712)}
{pt3dadd(93060.000000,185640.000000,162600.000000,461.892556)}
{pt3dadd(92940.000000,185640.000000,162600.000000,452.708254)}
{pt3dadd(92808.000000,185580.000000,162625.000000,457.412410)}
{pt3dadd(92724.000000,185688.000000,162700.000000,457.412410)}
{pt3dadd(92604.000000,185724.000000,162725.000000,480.989216)}
{pt3dadd(92472.000000,185712.000000,162625.000000,468.178632)}
{pt3dadd(92340.000000,185736.000000,162650.000000,463.911824)}
{pt3dadd(92208.000000,185844.000000,162750.000000,450.460714)}
{pt3dadd(92088.000000,185736.000000,162700.000000,446.193906)}
{pt3dadd(91944.000000,185808.000000,162650.000000,431.364054)}
{pt3dadd(91812.000000,185832.000000,162625.000000,459.004490)}
{pt3dadd(91644.000000,185832.000000,162675.000000,477.394956)}
{pt3dadd(91572.000000,185772.000000,162650.000000,481.661764)}
{pt3dadd(91452.000000,185772.000000,162675.000000,481.661764)}
{pt3dadd(91320.000000,185796.000000,162700.000000,481.661764)}
{pt3dadd(91212.000000,185784.000000,162700.000000,454.021328)}
{pt3dadd(91104.000000,185868.000000,162700.000000,435.630862)}
{pt3dadd(90984.000000,185880.000000,162650.000000,423.430308)}
{pt3dadd(90912.000000,185880.000000,162625.000000,427.697116)}
{pt3dadd(90804.000000,185832.000000,162600.000000,414.886532)}
{pt3dadd(90684.000000,185820.000000,162625.000000,394.260816)}
{pt3dadd(90576.000000,185844.000000,162675.000000,417.837622)}
{pt3dadd(90480.000000,185964.000000,162650.000000,421.707738)}
{pt3dadd(90360.000000,186060.000000,162625.000000,409.507184)}
{pt3dadd(90252.000000,186120.000000,162700.000000,391.913812)}
{pt3dadd(90144.000000,186156.000000,162750.000000,391.913812)}
{pt3dadd(90024.000000,186132.000000,162750.000000,332.895134)}
{pt3dadd(89904.000000,186228.000000,162775.000000,306.631058)}
{pt3dadd(89784.000000,186336.000000,162750.000000,289.875458)}
{pt3dadd(89676.000000,186444.000000,162750.000000,299.912886)}
{pt3dadd(89556.000000,186576.000000,162775.000000,291.655076)}
{pt3dadd(89448.000000,186624.000000,162775.000000,299.519662)}
{pt3dadd(89328.000000,186600.000000,162725.000000,305.158022)}
{pt3dadd(89244.000000,186648.000000,162700.000000,294.405496)}
{pt3dadd(89136.000000,186636.000000,162850.000000,265.944504)}
{pt3dadd(89016.000000,186648.000000,163000.000000,250.787394)}
{pt3dadd(88884.000000,186648.000000,163100.000000,236.129086)}
{pt3dadd(88788.000000,186744.000000,163075.000000,223.000646)}
{pt3dadd(88728.000000,186840.000000,163125.000000,228.114812)}
{pt3dadd(88632.000000,186816.000000,163125.000000,223.907376)}
{pt3dadd(88560.000000,186804.000000,163150.000000,234.193856)}
{pt3dadd(88488.000000,186876.000000,163100.000000,234.193856)}
{pt3dadd(88404.000000,186984.000000,163200.000000,234.193856)}
{pt3dadd(88296.000000,186948.000000,163125.000000,226.703776)}
{pt3dadd(88188.000000,187020.000000,163250.000000,228.756184)}
{pt3dadd(88080.000000,187032.000000,163325.000000,231.132098)}
{pt3dadd(87984.000000,187020.000000,163225.000000,240.420536)}
{pt3dadd(87888.000000,187008.000000,163250.000000,247.910616)}
{pt3dadd(87792.000000,187080.000000,163250.000000,250.286530)}
{pt3dadd(87696.000000,187068.000000,163250.000000,262.194418)}
{pt3dadd(87624.000000,187068.000000,163250.000000,264.689134)}
{pt3dadd(87528.000000,187068.000000,163250.000000,262.194418)}
{pt3dadd(87432.000000,187068.000000,163200.000000,257.080252)}
{pt3dadd(87336.000000,187044.000000,163225.000000,262.194418)}
{pt3dadd(87252.000000,187032.000000,163250.000000,259.574968)}
{pt3dadd(87156.000000,187008.000000,163275.000000,262.194418)}
{pt3dadd(87060.000000,187092.000000,163250.000000,267.308584)}
{pt3dadd(86952.000000,187116.000000,163300.000000,258.462454)}
{pt3dadd(86844.000000,187080.000000,163300.000000,248.709594)}
{pt3dadd(86736.000000,187128.000000,163150.000000,246.214878)}
{pt3dadd(86640.000000,187128.000000,163075.000000,238.724798)}
{pt3dadd(86532.000000,187068.000000,163125.000000,220.948238)}
{pt3dadd(86436.000000,187116.000000,163225.000000,218.993566)}
{pt3dadd(86340.000000,187092.000000,163200.000000,218.993566)}
{pt3dadd(86220.000000,187152.000000,163225.000000,204.558222)}
{pt3dadd(86112.000000,187164.000000,163250.000000,200.140414)}
{pt3dadd(86028.000000,187164.000000,163250.000000,200.140414)}
{pt3dadd(85932.000000,187176.000000,163275.000000,196.505872)}
{pt3dadd(85848.000000,187188.000000,163275.000000,188.482172)}
{pt3dadd(85800.000000,187116.000000,163250.000000,186.793652)}
{pt3dadd(85704.000000,187176.000000,163300.000000,182.786572)}
{pt3dadd(85596.000000,187128.000000,163300.000000,177.716988)}
{pt3dadd(85488.000000,187140.000000,163350.000000,177.716988)}
{pt3dadd(85392.000000,187104.000000,163275.000000,177.716988)}
{pt3dadd(85296.000000,187164.000000,163325.000000,179.405508)}
{pt3dadd(85212.000000,187176.000000,163350.000000,179.405508)}
{pt3dadd(85176.000000,187080.000000,163375.000000,184.475092)}
{pt3dadd(85080.000000,187080.000000,163450.000000,186.248042)}
{pt3dadd(84960.000000,186996.000000,163375.000000,186.248042)}
{pt3dadd(84864.000000,187020.000000,163450.000000,188.020992)}
{pt3dadd(84804.000000,187044.000000,163400.000000,182.697930)}
{pt3dadd(84696.000000,187140.000000,163475.000000,180.924980)}
{pt3dadd(84588.000000,187104.000000,163475.000000,180.924980)}
{pt3dadd(84492.000000,187092.000000,163475.000000,182.786572)}
{pt3dadd(84444.000000,187056.000000,163500.000000,184.648164)}
{pt3dadd(84348.000000,187032.000000,163475.000000,198.396114)}
{pt3dadd(84252.000000,187020.000000,163475.000000,206.037736)}
{pt3dadd(84168.000000,187116.000000,163475.000000,211.906408)}
{pt3dadd(84084.000000,187104.000000,163450.000000,213.861080)}
{pt3dadd(83988.000000,187068.000000,163475.000000,215.815752)}
{pt3dadd(83904.000000,187092.000000,163475.000000,213.552972)}
{pt3dadd(83796.000000,187140.000000,163475.000000,209.545892)}
{pt3dadd(83700.000000,187176.000000,163425.000000,207.493484)}
{pt3dadd(83592.000000,187104.000000,163350.000000,209.545892)}
{pt3dadd(83484.000000,187140.000000,163325.000000,207.591220)}
{pt3dadd(83388.000000,187212.000000,163350.000000,205.436192)}
{pt3dadd(83304.000000,187272.000000,163375.000000,224.101580)}
{pt3dadd(83208.000000,187320.000000,163400.000000,243.700236)}
{pt3dadd(83112.000000,187284.000000,163375.000000,261.246484)}
{pt3dadd(82980.000000,187368.000000,163425.000000,279.911872)}
{pt3dadd(82896.000000,187512.000000,163450.000000,286.705594)}
{pt3dadd(82800.000000,187596.000000,163400.000000,286.705594)}
{pt3dadd(82692.000000,187584.000000,163575.000000,273.577154)}
{pt3dadd(82596.000000,187560.000000,163525.000000,262.824628)}
{pt3dadd(82500.000000,187596.000000,163650.000000,257.454758)}
{pt3dadd(82404.000000,187548.000000,163600.000000,255.078844)}
{pt3dadd(82308.000000,187620.000000,163500.000000,247.214258)}
{pt3dadd(82212.000000,187608.000000,163675.000000,244.951478)}
{pt3dadd(82104.000000,187620.000000,163650.000000,255.704004)}
{pt3dadd(82008.000000,187668.000000,163675.000000,258.323454)}
{pt3dadd(81900.000000,187716.000000,163700.000000,260.699368)}
{pt3dadd(81804.000000,187704.000000,163775.000000,265.813534)}
{pt3dadd(81696.000000,187740.000000,163875.000000,265.813534)}
{pt3dadd(81588.000000,187728.000000,163875.000000,248.267286)}
{pt3dadd(81576.000000,187596.000000,163750.000000,238.514426)}
{pt3dadd(81492.000000,187692.000000,163825.000000,236.138512)}
{pt3dadd(81396.000000,187680.000000,163875.000000,236.138512)}
{pt3dadd(81336.000000,187764.000000,163925.000000,243.271922)}
{pt3dadd(81228.000000,187800.000000,163950.000000,250.065644)}
{pt3dadd(81132.000000,187860.000000,163900.000000,250.065644)}
{pt3dadd(81048.000000,187836.000000,163925.000000,250.065644)}
{pt3dadd(80964.000000,187884.000000,164000.000000,240.312784)}
{pt3dadd(80868.000000,187884.000000,164050.000000,237.818068)}
{pt3dadd(80748.000000,188004.000000,164125.000000,227.017266)}
{pt3dadd(80628.000000,187968.000000,164075.000000,222.809830)}
{pt3dadd(80532.000000,187944.000000,164075.000000,205.922230)}
{pt3dadd(80436.000000,187956.000000,164100.000000,194.437060)}
{pt3dadd(80328.000000,187956.000000,164125.000000,178.313196)}
{pt3dadd(80196.000000,187944.000000,164175.000000,167.002724)}
{pt3dadd(80076.000000,187944.000000,164225.000000,158.116876)}
{pt3dadd(79968.000000,187932.000000,164275.000000,158.116876)}
{pt3dadd(79872.000000,187968.000000,164175.000000,148.346466)}
{pt3dadd(79776.000000,187992.000000,164225.000000,141.036056)}
{pt3dadd(79668.000000,188016.000000,164275.000000,141.036056)}
{pt3dadd(79560.000000,188040.000000,164300.000000,136.656760)}
{pt3dadd(79452.000000,188004.000000,164300.000000,132.486000)}
{pt3dadd(79344.000000,188040.000000,164325.000000,133.686000)}
{pt3dadd(79236.000000,188112.000000,164350.000000,131.226000)}
{pt3dadd(79128.000000,188136.000000,164325.000000,127.443000)}
{pt3dadd(79008.000000,188124.000000,164300.000000,123.660000)}
{pt3dadd(78888.000000,188208.000000,164350.000000,121.200000)}
{pt3dadd(78816.000000,188220.000000,164325.000000,128.162296)}
{pt3dadd(78720.000000,188244.000000,164300.000000,133.334446)}
{pt3dadd(78684.000000,188292.000000,164275.000000,139.965206)}
{pt3dadd(78576.000000,188400.000000,164250.000000,153.197086)}
{pt3dadd(78468.000000,188352.000000,164275.000000,174.452666)}
{pt3dadd(78372.000000,188424.000000,164250.000000,185.390922)}
{pt3dadd(78288.000000,188520.000000,164250.000000,185.390922)}
{pt3dadd(78156.000000,188544.000000,164200.000000,185.390922)}
{pt3dadd(78048.000000,188640.000000,164200.000000,178.789802)}
{pt3dadd(77952.000000,188760.000000,164200.000000,161.317222)}
{pt3dadd(77856.000000,188784.000000,164250.000000,144.676670)}
{pt3dadd(77760.000000,188832.000000,164300.000000,146.135280)}
{pt3dadd(77664.000000,188856.000000,164275.000000,149.274930)}
{pt3dadd(77556.000000,188964.000000,164275.000000,147.816320)}
{pt3dadd(77436.000000,189060.000000,164225.000000,167.551680)}
{pt3dadd(77328.000000,189156.000000,164200.000000,173.253976)}
{pt3dadd(77208.000000,189192.000000,164225.000000,183.671360)}
{pt3dadd(77100.000000,189204.000000,164225.000000,183.671360)}
{pt3dadd(76980.000000,189156.000000,164275.000000,195.547354)}
{pt3dadd(76860.000000,189120.000000,164425.000000,191.129546)}
{pt3dadd(76764.000000,189192.000000,164500.000000,200.015394)}
{pt3dadd(76632.000000,189252.000000,164525.000000,206.485610)}
{pt3dadd(76512.000000,189132.000000,164675.000000,209.947080)}
{pt3dadd(76404.000000,189120.000000,164700.000000,218.793210)}
{pt3dadd(76296.000000,189216.000000,164725.000000,223.211018)}
{pt3dadd(76200.000000,189312.000000,164775.000000,225.263426)}
{pt3dadd(76092.000000,189348.000000,164750.000000,220.845618)}
{pt3dadd(75996.000000,189336.000000,164775.000000,233.508012)}
{pt3dadd(75888.000000,189300.000000,164675.000000,236.002728)}
{pt3dadd(75780.000000,189348.000000,164700.000000,233.739948)}
{pt3dadd(75672.000000,189396.000000,164750.000000,233.739948)}
{pt3dadd(75576.000000,189540.000000,164725.000000,240.533670)}
{pt3dadd(75456.000000,189492.000000,164775.000000,235.894976)}
{pt3dadd(75348.000000,189492.000000,164800.000000,228.761566)}
{pt3dadd(75216.000000,189564.000000,164850.000000,218.964916)}
{pt3dadd(75108.000000,189504.000000,164850.000000,211.323294)}
{pt3dadd(74988.000000,189504.000000,164850.000000,200.522492)}
{pt3dadd(74868.000000,189528.000000,164875.000000,187.429208)}
{pt3dadd(74784.000000,189432.000000,164775.000000,177.632558)}
{pt3dadd(74628.000000,189480.000000,164875.000000,174.335924)}
{pt3dadd(74508.000000,189504.000000,164900.000000,169.507754)}
{pt3dadd(74424.000000,189516.000000,165025.000000,161.045042)}
{pt3dadd(74328.000000,189552.000000,164975.000000,161.045042)}
{pt3dadd(74232.000000,189612.000000,164925.000000,157.748408)}
{pt3dadd(74124.000000,189576.000000,164950.000000,157.748408)}
{pt3dadd(74052.000000,189696.000000,165025.000000,162.576578)}
{pt3dadd(73956.000000,189684.000000,165000.000000,162.576578)}
{pt3dadd(73860.000000,189684.000000,165050.000000,165.873212)}
{pt3dadd(73752.000000,189792.000000,165100.000000,167.481326)}
{pt3dadd(73692.000000,189792.000000,165100.000000,165.949790)}
{pt3dadd(73620.000000,189864.000000,165100.000000,167.722740)}
{pt3dadd(73548.000000,189852.000000,165150.000000,178.140124)}
{pt3dadd(73464.000000,189888.000000,165250.000000,195.070184)}
{pt3dadd(73368.000000,189840.000000,165250.000000,204.400326)}
{pt3dadd(73296.000000,189900.000000,165275.000000,219.025146)}
{pt3dadd(73224.000000,189948.000000,165250.000000,229.311626)}
{pt3dadd(73128.000000,189996.000000,165225.000000,223.722412)}
{pt3dadd(73044.000000,189960.000000,165250.000000,216.589002)}
{pt3dadd(72948.000000,189936.000000,165275.000000,231.247310)}
{pt3dadd(72828.000000,189912.000000,165375.000000,231.247310)}
{pt3dadd(72696.000000,189852.000000,165425.000000,228.984530)}
{pt3dadd(72612.000000,189828.000000,165500.000000,230.757480)}
{pt3dadd(72504.000000,189816.000000,165600.000000,226.550044)}
{pt3dadd(72384.000000,189792.000000,165700.000000,204.250114)}
{pt3dadd(72276.000000,189744.000000,165775.000000,204.250114)}
{pt3dadd(72180.000000,189720.000000,165850.000000,202.095086)}
{pt3dadd(72096.000000,189720.000000,165875.000000,214.757480)}
{pt3dadd(71976.000000,189684.000000,165900.000000,212.802808)}
{pt3dadd(71856.000000,189696.000000,166000.000000,220.444430)}
{pt3dadd(71748.000000,189480.000000,166025.000000,210.647780)}
{pt3dadd(71640.000000,189504.000000,166050.000000,225.306088)}
{pt3dadd(71544.000000,189468.000000,166050.000000,249.128386)}
{pt3dadd(71436.000000,189552.000000,166150.000000,280.241170)}
{pt3dadd(71328.000000,189528.000000,166250.000000,294.899478)}
{pt3dadd(71208.000000,189576.000000,166300.000000,323.119692)}
{pt3dadd(71088.000000,189456.000000,166450.000000,339.077404)}
{pt3dadd(70956.000000,189432.000000,166525.000000,465.360832)}
{pt3dadd(70824.000000,189444.000000,166600.000000,562.326193)}
{pt3dadd(70692.000000,189456.000000,166675.000000,1000.000000)}

{create adhoc22}
{access adhoc22}
{connect adhoc22(1), adhoc20(0)}
{nseg = 1}
{strdef color color = "White"}
{pt3dclear()}
{pt3dadd(136536.000000,184512.000000,149800.000000,334.315520)}
{pt3dadd(136536.000000,184320.000000,149975.000000,302.074280)}
{pt3dadd(137160.000000,184164.000000,150025.000000,238.335328)}
{pt3dadd(137268.000000,184224.000000,150350.000000,202.102984)}
{pt3dadd(137616.000000,184260.000000,150600.000000,167.402176)}
{pt3dadd(137832.000000,184440.000000,150800.000000,152.046112)}
{pt3dadd(137724.000000,184512.000000,151125.000000,164.679584)}
{pt3dadd(138132.000000,184296.000000,151450.000000,175.096968)}
{pt3dadd(138024.000000,184548.000000,151750.000000,183.559680)}
{pt3dadd(138096.000000,184296.000000,152075.000000,182.028144)}
{pt3dadd(138300.000000,184308.000000,152325.000000,183.636258)}
{pt3dadd(138792.000000,184152.000000,152525.000000,196.615486)}
{pt3dadd(139128.000000,184140.000000,152925.000000,352.254582)}
{pt3dadd(139872.000000,184248.000000,152825.000000,576.740850)}
{pt3dadd(141132.000000,184884.000000,152825.000000,797.138410)}
{pt3dadd(142416.000000,185952.000000,152825.000000,1014.396320)}
{pt3dadd(143004.000000,187068.000000,152825.000000,1276.060633)}
{pt3dadd(143448.000000,187068.000000,151850.000000,1255.141600)}

{create adhoc23}
{access adhoc23}
{connect adhoc23(1), adhoc7(0)}
{nseg = 1}
{strdef color color = "White"}
{pt3dclear()}
{pt3dadd(190776.000000,188148.000000,99425.000000,351.031280)}
{pt3dadd(189900.000000,188472.000000,99275.000000,229.524000)}
{pt3dadd(189624.000000,188652.000000,99050.000000,188.114400)}
{pt3dadd(189516.000000,188640.000000,98950.000000,158.956288)}
{pt3dadd(189504.000000,188592.000000,98800.000000,161.008696)}
{pt3dadd(189324.000000,188592.000000,98575.000000,173.642168)}
{pt3dadd(189228.000000,188712.000000,98475.000000,191.542720)}
{pt3dadd(189180.000000,188700.000000,98375.000000,192.802720)}
{pt3dadd(189036.000000,188724.000000,98250.000000,183.916872)}
{pt3dadd(188796.000000,188820.000000,98125.000000,179.909792)}
{pt3dadd(188700.000000,188940.000000,98000.000000,188.334680)}
{pt3dadd(188772.000000,188844.000000,97850.000000,197.623118)}
{pt3dadd(188808.000000,189096.000000,97725.000000,218.681478)}
{pt3dadd(188724.000000,189168.000000,97575.000000,227.567326)}
{pt3dadd(188568.000000,189180.000000,97450.000000,223.932784)}
{pt3dadd(188424.000000,189240.000000,97300.000000,228.803414)}
{pt3dadd(188508.000000,189336.000000,97200.000000,211.873354)}
{pt3dadd(188436.000000,189348.000000,97050.000000,196.517290)}
{pt3dadd(188064.000000,189576.000000,96925.000000,184.641296)}
{pt3dadd(188028.000000,189768.000000,96800.000000,174.382366)}
{pt3dadd(187836.000000,189864.000000,96650.000000,149.776376)}
{pt3dadd(187668.000000,190008.000000,96525.000000,140.777446)}
{pt3dadd(187392.000000,190176.000000,96375.000000,149.663294)}
{pt3dadd(187260.000000,190560.000000,96125.000000,170.385418)}
{pt3dadd(186888.000000,190764.000000,96000.000000,197.574408)}
{pt3dadd(186804.000000,190848.000000,95850.000000,215.046988)}
{pt3dadd(186648.000000,190956.000000,95725.000000,236.105348)}
{pt3dadd(186384.000000,191052.000000,95600.000000,230.516134)}
{pt3dadd(186360.000000,191196.000000,95375.000000,238.380720)}
{pt3dadd(186276.000000,191196.000000,95225.000000,233.510090)}
{pt3dadd(186048.000000,190992.000000,95050.000000,233.510090)}
{pt3dadd(186204.000000,191184.000000,94825.000000,243.750590)}
{pt3dadd(186012.000000,191244.000000,94500.000000,260.680650)}
{pt3dadd(185880.000000,191388.000000,94300.000000,260.680650)}
{pt3dadd(185736.000000,191520.000000,93875.000000,254.210434)}
{pt3dadd(185592.000000,191508.000000,93550.000000,266.713714)}
{pt3dadd(185544.000000,191544.000000,93150.000000,244.413784)}
{pt3dadd(185544.000000,191676.000000,92850.000000,231.118266)}
{pt3dadd(185544.000000,191736.000000,92425.000000,228.367846)}
{pt3dadd(185532.000000,191808.000000,92225.000000,215.102702)}
{pt3dadd(185460.000000,191964.000000,92075.000000,194.575722)}
{pt3dadd(185280.000000,192000.000000,91950.000000,209.011066)}
{pt3dadd(185328.000000,192036.000000,91800.000000,236.780698)}
{pt3dadd(185328.000000,192288.000000,91575.000000,255.488830)}
{pt3dadd(185160.000000,192396.000000,91450.000000,272.961410)}
{pt3dadd(184872.000000,193044.000000,91325.000000,276.777674)}
{pt3dadd(184668.000000,193380.000000,91225.000000,254.666400)}
{pt3dadd(184524.000000,193512.000000,91075.000000,214.263296)}
{pt3dadd(184260.000000,194088.000000,90950.000000,174.317134)}
{pt3dadd(183924.000000,194604.000000,90850.000000,164.520484)}
{pt3dadd(183744.000000,194940.000000,90700.000000,158.931270)}
{pt3dadd(183612.000000,195408.000000,90600.000000,168.380150)}
{pt3dadd(183348.000000,195768.000000,90475.000000,187.175730)}
{pt3dadd(183108.000000,196080.000000,90350.000000,190.637200)}
{pt3dadd(182976.000000,196848.000000,90200.000000,192.410150)}
{pt3dadd(182916.000000,197292.000000,90075.000000,192.410150)}
{pt3dadd(182796.000000,197616.000000,89950.000000,200.433850)}
{pt3dadd(182760.000000,197676.000000,89800.000000,188.948680)}
{pt3dadd(182832.000000,197880.000000,89675.000000,201.611074)}
{pt3dadd(182952.000000,198216.000000,89550.000000,201.611074)}
{pt3dadd(182688.000000,198780.000000,89325.000000,221.160584)}
{pt3dadd(182364.000000,199392.000000,89175.000000,205.077154)}
{pt3dadd(182112.000000,199836.000000,89175.000000,208.538624)}
{pt3dadd(181920.000000,200196.000000,88925.000000,186.427350)}
{pt3dadd(181716.000000,200436.000000,88825.000000,181.357766)}
{pt3dadd(181428.000000,200664.000000,88725.000000,160.119736)}
{pt3dadd(181320.000000,200772.000000,88475.000000,166.406516)}
{pt3dadd(181116.000000,200940.000000,88200.000000,161.336932)}
{pt3dadd(180864.000000,201036.000000,87975.000000,181.072292)}
{pt3dadd(180720.000000,201036.000000,87850.000000,188.003468)}
{pt3dadd(180516.000000,201084.000000,87600.000000,197.333610)}
{pt3dadd(180396.000000,201192.000000,87475.000000,194.036976)}
{pt3dadd(180048.000000,201156.000000,87350.000000,188.334680)}
{pt3dadd(180144.000000,201288.000000,87225.000000,171.447080)}
{pt3dadd(180120.000000,201360.000000,87125.000000,160.136608)}
{pt3dadd(179976.000000,201324.000000,87000.000000,142.236056)}
{pt3dadd(179988.000000,201552.000000,86775.000000,136.533760)}
{pt3dadd(179676.000000,201648.000000,86550.000000,143.844170)}
{pt3dadd(179520.000000,201936.000000,86425.000000,150.445290)}
{pt3dadd(179364.000000,202164.000000,86300.000000,156.432700)}
{pt3dadd(179412.000000,202164.000000,86175.000000,183.621690)}
{pt3dadd(179316.000000,202236.000000,86050.000000,186.333840)}
{pt3dadd(179124.000000,202536.000000,85925.000000,200.081790)}
{pt3dadd(179100.000000,202752.000000,85800.000000,217.858350)}
{pt3dadd(179076.000000,202968.000000,85650.000000,229.343520)}
{pt3dadd(178824.000000,203184.000000,85525.000000,222.210110)}
{pt3dadd(178716.000000,203172.000000,85375.000000,232.131432)}
{pt3dadd(178608.000000,203232.000000,85475.000000,229.868652)}
{pt3dadd(178476.000000,203400.000000,85450.000000,227.249202)}
{pt3dadd(178356.000000,203556.000000,85375.000000,215.764032)}
{pt3dadd(178224.000000,203640.000000,85250.000000,213.609004)}
{pt3dadd(178116.000000,203832.000000,85175.000000,217.616084)}
{pt3dadd(178032.000000,203820.000000,85150.000000,213.408648)}
{pt3dadd(177912.000000,203916.000000,85175.000000,216.028098)}
{pt3dadd(177780.000000,204048.000000,85175.000000,245.936832)}
{pt3dadd(177660.000000,204216.000000,85175.000000,269.699384)}
{pt3dadd(177540.000000,204432.000000,85200.000000,281.607272)}
{pt3dadd(177420.000000,204612.000000,85200.000000,304.238272)}
{pt3dadd(177288.000000,204624.000000,85225.000000,316.092936)}
{pt3dadd(177156.000000,204708.000000,85150.000000,322.620048)}
{pt3dadd(177024.000000,204936.000000,85225.000000,308.145934)}
{pt3dadd(176892.000000,205032.000000,85300.000000,285.299790)}
{pt3dadd(176760.000000,205020.000000,85200.000000,253.782942)}
{pt3dadd(176628.000000,205032.000000,85250.000000,213.379838)}
{pt3dadd(176496.000000,205128.000000,85200.000000,173.804342)}
{pt3dadd(176364.000000,205116.000000,85175.000000,147.875352)}
{pt3dadd(176232.000000,205200.000000,85200.000000,142.173056)}
{pt3dadd(176088.000000,205236.000000,85100.000000,137.793760)}
{pt3dadd(175896.000000,205464.000000,85125.000000,137.793760)}
{pt3dadd(175680.000000,205764.000000,85125.000000,132.363000)}
{pt3dadd(175500.000000,206052.000000,85050.000000,132.363000)}
{pt3dadd(175260.000000,206220.000000,84900.000000,136.533760)}
{pt3dadd(175128.000000,206268.000000,84775.000000,140.913056)}
{pt3dadd(174924.000000,206556.000000,84750.000000,140.913056)}
{pt3dadd(174780.000000,206736.000000,84600.000000,149.483466)}
{pt3dadd(174552.000000,206856.000000,84500.000000,153.654226)}
{pt3dadd(174396.000000,207144.000000,84275.000000,170.541826)}
{pt3dadd(174204.000000,207300.000000,84125.000000,175.611410)}
{pt3dadd(174120.000000,207336.000000,84050.000000,181.313706)}
{pt3dadd(173856.000000,207444.000000,83825.000000,184.775176)}
{pt3dadd(173628.000000,207432.000000,83575.000000,193.237888)}
{pt3dadd(173388.000000,207708.000000,83275.000000,184.813000)}
{pt3dadd(173172.000000,207984.000000,83150.000000,202.589560)}
{pt3dadd(172896.000000,208116.000000,83025.000000,217.945624)}
{pt3dadd(172680.000000,208344.000000,82850.000000,233.102734)}
{pt3dadd(172452.000000,208428.000000,82725.000000,241.527622)}
{pt3dadd(172248.000000,208464.000000,82600.000000,260.193010)}
{pt3dadd(172176.000000,208464.000000,82375.000000,246.232714)}
{pt3dadd(171852.000000,208728.000000,82100.000000,232.484764)}
{pt3dadd(171696.000000,208860.000000,81975.000000,210.726534)}
{pt3dadd(171612.000000,209220.000000,81850.000000,204.256318)}
{pt3dadd(171528.000000,209244.000000,81575.000000,183.729338)}
{pt3dadd(171504.000000,209388.000000,81450.000000,181.517973)}
{pt3dadd(171408.000000,209472.000000,81325.000000,186.159400)}

{create adhoc24}
{access adhoc24}
{connect adhoc24(1), adhoc23(0)}
{nseg = 1}
{strdef color color = "White"}
{pt3dclear()}
{pt3dadd(171408.000000,209472.000000,81325.000000,186.159400)}
{pt3dadd(171312.000000,209976.000000,81225.000000,167.456350)}
{pt3dadd(171192.000000,210300.000000,81075.000000,154.845960)}
{pt3dadd(170964.000000,210456.000000,80825.000000,148.244840)}
{pt3dadd(170772.000000,210648.000000,80700.000000,152.624136)}
{pt3dadd(170592.000000,210876.000000,80550.000000,140.022348)}
{pt3dadd(170400.000000,211008.000000,80425.000000,133.707340)}
{pt3dadd(170340.000000,210936.000000,80300.000000,131.364482)}
{pt3dadd(170136.000000,211068.000000,80175.000000,120.478582)}
{pt3dadd(169884.000000,211176.000000,80025.000000,104.560431)}
{pt3dadd(169560.000000,211272.000000,79900.000000,106.903289)}
{pt3dadd(169392.000000,211428.000000,79775.000000,105.814855)}
{pt3dadd(169104.000000,211620.000000,79650.000000,109.417713)}
{pt3dadd(168612.000000,211812.000000,79525.000000,130.720997)}
{pt3dadd(168204.000000,212136.000000,79525.000000,148.794753)}
{pt3dadd(167676.000000,212664.000000,79525.000000,205.240720)}

{create adhoc25}
{access adhoc25}
{connect adhoc25(1), adhoc24(0)}
{nseg = 1}
{strdef color color = "White"}
{pt3dclear()}
{pt3dadd(167676.000000,212664.000000,79525.000000,205.240720)}
{pt3dadd(167508.000000,212916.000000,79275.000000,230.767963)}
{pt3dadd(167484.000000,212964.000000,79150.000000,223.211018)}
{pt3dadd(167400.000000,212940.000000,79025.000000,214.325170)}
{pt3dadd(167316.000000,212916.000000,78900.000000,195.978960)}
{pt3dadd(167256.000000,212928.000000,78750.000000,164.277210)}
{pt3dadd(167172.000000,213072.000000,78575.000000,145.860750)}

{create adhoc26}
{access adhoc26}
{connect adhoc26(1), adhoc24(0)}
{nseg = 1}
{strdef color color = "White"}
{pt3dclear()}
{pt3dadd(167676.000000,212664.000000,79525.000000,205.240720)}
{pt3dadd(167664.000000,213024.000000,79525.000000,179.874360)}
{pt3dadd(167616.000000,213264.000000,79450.000000,150.180968)}
{pt3dadd(167724.000000,213768.000000,79450.000000,126.189176)}
{pt3dadd(168012.000000,214284.000000,79450.000000,107.827807)}
{pt3dadd(168204.000000,214620.000000,79450.000000,102.901949)}
{pt3dadd(168420.000000,214992.000000,79450.000000,101.075995)}
{pt3dadd(168708.000000,215268.000000,79500.000000,114.285710)}

{create adhoc27}
{access adhoc27}
{connect adhoc27(1), adhoc23(0)}
{nseg = 1}
{strdef color color = "White"}
{pt3dclear()}
{pt3dadd(171408.000000,209472.000000,81325.000000,186.159400)}
{pt3dadd(171336.000000,209604.000000,81200.000000,140.334313)}
{pt3dadd(171168.000000,209628.000000,80950.000000,137.183588)}
{pt3dadd(171096.000000,209328.000000,80750.000000,125.151708)}
{pt3dadd(171156.000000,209328.000000,80500.000000,128.583000)}
{pt3dadd(171060.000000,209196.000000,80375.000000,129.843000)}
{pt3dadd(170988.000000,209136.000000,80225.000000,129.843000)}
{pt3dadd(170964.000000,209208.000000,80075.000000,128.520000)}
{pt3dadd(170904.000000,209088.000000,79950.000000,131.103000)}
{pt3dadd(170856.000000,208968.000000,79800.000000,133.686000)}
{pt3dadd(170832.000000,209064.000000,79675.000000,135.009000)}
{pt3dadd(170796.000000,209004.000000,79550.000000,141.971296)}
{pt3dadd(170676.000000,208860.000000,79400.000000,149.281706)}
{pt3dadd(170604.000000,208860.000000,79275.000000,147.958706)}
{pt3dadd(170580.000000,208836.000000,79150.000000,152.338002)}
{pt3dadd(170508.000000,208800.000000,79000.000000,158.325412)}
{pt3dadd(170484.000000,208716.000000,78850.000000,153.946116)}
{pt3dadd(170472.000000,208740.000000,78725.000000,153.946116)}
{pt3dadd(170424.000000,208644.000000,78575.000000,166.579588)}
{pt3dadd(170316.000000,208572.000000,78450.000000,181.935652)}
{pt3dadd(170376.000000,208548.000000,78325.000000,191.265794)}
{pt3dadd(170316.000000,208428.000000,78175.000000,208.738374)}
{pt3dadd(170292.000000,208380.000000,78050.000000,232.726824)}
{pt3dadd(170244.000000,208272.000000,77925.000000,246.022342)}
{pt3dadd(170136.000000,208236.000000,77775.000000,224.963982)}
{pt3dadd(170028.000000,208332.000000,77650.000000,207.063430)}
{pt3dadd(170100.000000,208440.000000,77525.000000,193.970146)}
{pt3dadd(170076.000000,208476.000000,77375.000000,166.842046)}
{pt3dadd(170004.000000,208428.000000,77250.000000,145.083816)}
{pt3dadd(169932.000000,208536.000000,77100.000000,146.406816)}
{pt3dadd(169872.000000,208548.000000,76975.000000,153.369112)}
{pt3dadd(169896.000000,208392.000000,76850.000000,154.977226)}
{pt3dadd(169812.000000,208368.000000,76725.000000,154.977226)}
{pt3dadd(169800.000000,208308.000000,76575.000000,149.546466)}
{pt3dadd(169812.000000,208320.000000,76450.000000,146.963466)}
{pt3dadd(169800.000000,208308.000000,76325.000000,148.571580)}
{pt3dadd(169740.000000,208212.000000,76175.000000,142.584170)}
{pt3dadd(169716.000000,208176.000000,76050.000000,138.413410)}
{pt3dadd(169776.000000,208116.000000,75925.000000,145.375706)}
{pt3dadd(169776.000000,208116.000000,75675.000000,153.946116)}
{pt3dadd(169740.000000,208056.000000,75525.000000,147.958706)}
{pt3dadd(169836.000000,207984.000000,75400.000000,147.958706)}
{pt3dadd(169752.000000,207828.000000,75275.000000,152.129466)}
{pt3dadd(169920.000000,208008.000000,75150.000000,146.427170)}
{pt3dadd(169980.000000,208032.000000,75025.000000,140.439760)}
{pt3dadd(169980.000000,207984.000000,74875.000000,157.912340)}
{pt3dadd(170004.000000,207900.000000,74750.000000,159.301490)}
{pt3dadd(170088.000000,207888.000000,74600.000000,162.441140)}
{pt3dadd(170016.000000,207744.000000,74475.000000,163.764140)}
{pt3dadd(170148.000000,207708.000000,74325.000000,169.751550)}
{pt3dadd(170136.000000,207492.000000,74175.000000,155.126730)}
{pt3dadd(170124.000000,207336.000000,74050.000000,156.585340)}
{pt3dadd(170184.000000,207360.000000,73900.000000,180.573790)}
{pt3dadd(170064.000000,207120.000000,73750.000000,180.573790)}
{pt3dadd(169944.000000,206940.000000,73625.000000,175.975530)}
{pt3dadd(170076.000000,206880.000000,73475.000000,180.803700)}
{pt3dadd(170076.000000,206892.000000,73350.000000,187.404820)}
{pt3dadd(170016.000000,206652.000000,73200.000000,153.645960)}
{pt3dadd(169980.000000,206688.000000,73050.000000,156.493720)}
{pt3dadd(169860.000000,206496.000000,72900.000000,155.104570)}
{pt3dadd(169764.000000,206436.000000,72750.000000,144.845640)}
{pt3dadd(169752.000000,206328.000000,72625.000000,138.244520)}
{pt3dadd(169716.000000,206028.000000,72475.000000,161.762880)}
{pt3dadd(169632.000000,205992.000000,72325.000000,163.294416)}
{pt3dadd(169488.000000,205836.000000,72200.000000,161.971416)}
{pt3dadd(169416.000000,205716.000000,72050.000000,168.933712)}
{pt3dadd(169308.000000,205572.000000,71900.000000,177.396424)}
{pt3dadd(169380.000000,205440.000000,71775.000000,167.109944)}
{pt3dadd(169116.000000,205392.000000,71625.000000,175.995792)}
{pt3dadd(168984.000000,205428.000000,71500.000000,184.994722)}
{pt3dadd(168972.000000,205332.000000,71350.000000,202.726700)}
{pt3dadd(168960.000000,205212.000000,71200.000000,216.022218)}
{pt3dadd(168960.000000,205152.000000,71075.000000,233.798778)}
{pt3dadd(168864.000000,205164.000000,70925.000000,229.982514)}
{pt3dadd(168840.000000,205164.000000,70800.000000,242.041944)}
{pt3dadd(168708.000000,205128.000000,70675.000000,229.379550)}
{pt3dadd(168660.000000,205188.000000,70525.000000,214.222440)}
{pt3dadd(168564.000000,205152.000000,70375.000000,209.108274)}
{pt3dadd(168552.000000,204996.000000,70225.000000,217.131974)}
{pt3dadd(168600.000000,204900.000000,70075.000000,212.714166)}
{pt3dadd(168420.000000,204780.000000,69925.000000,220.737866)}
{pt3dadd(168252.000000,204996.000000,69775.000000,235.894976)}
{pt3dadd(168108.000000,204960.000000,69625.000000,225.094174)}
{pt3dadd(167988.000000,204840.000000,69500.000000,222.939146)}
{pt3dadd(167964.000000,204828.000000,69350.000000,217.070474)}
{pt3dadd(167892.000000,204792.000000,69200.000000,200.987044)}
{pt3dadd(167832.000000,204744.000000,69075.000000,179.228814)}
{pt3dadd(167508.000000,204804.000000,68925.000000,166.595342)}
{pt3dadd(167364.000000,204672.000000,68800.000000,149.954790)}
{pt3dadd(167136.000000,204564.000000,68625.000000,140.505910)}
{pt3dadd(166848.000000,204516.000000,68500.000000,137.793760)}
{pt3dadd(166644.000000,204504.000000,68400.000000,132.363000)}
{pt3dadd(166632.000000,204456.000000,68300.000000,133.686000)}
{pt3dadd(166560.000000,204348.000000,68175.000000,131.226000)}
{pt3dadd(166512.000000,204180.000000,68050.000000,122.247628)}
{pt3dadd(166392.000000,204144.000000,67925.000000,118.644770)}
{pt3dadd(166272.000000,204096.000000,67825.000000,115.213478)}
{pt3dadd(166260.000000,204132.000000,67700.000000,110.287620)}
{pt3dadd(166176.000000,204120.000000,67575.000000,107.019723)}
{pt3dadd(166092.000000,203868.000000,67450.000000,107.959955)}
{pt3dadd(166116.000000,203808.000000,67325.000000,110.302813)}
{pt3dadd(166116.000000,203664.000000,67225.000000,114.994105)}
{pt3dadd(166128.000000,203616.000000,67100.000000,118.596963)}
{pt3dadd(166020.000000,203484.000000,66975.000000,124.324860)}
{pt3dadd(166020.000000,203352.000000,66875.000000,129.780000)}
{pt3dadd(166008.000000,203352.000000,66750.000000,131.040000)}
{pt3dadd(165960.000000,203412.000000,66600.000000,126.348708)}
{pt3dadd(165996.000000,203292.000000,66425.000000,121.657416)}
{pt3dadd(165948.000000,203352.000000,66325.000000,119.197416)}
{pt3dadd(165816.000000,203208.000000,66200.000000,115.766124)}
{pt3dadd(165732.000000,203112.000000,66100.000000,112.562360)}
{pt3dadd(165660.000000,203100.000000,65975.000000,108.843540)}

{create adhoc28}
{access adhoc28}
{connect adhoc28(1), adhoc2(0)}
{nseg = 1}
{strdef color color = "White"}
{pt3dclear()}
{pt3dadd(176088.000000,156312.000000,60375.000000,288.794300)}
{pt3dadd(176088.000000,156192.000000,60150.000000,188.874767)}
{pt3dadd(176472.000000,155388.000000,59850.000000,174.586380)}
{pt3dadd(176400.000000,155064.000000,59675.000000,148.989816)}
{pt3dadd(176340.000000,154848.000000,59600.000000,150.378966)}
{pt3dadd(176376.000000,154716.000000,59375.000000,158.054896)}
{pt3dadd(176340.000000,154572.000000,59250.000000,161.194546)}
{pt3dadd(176400.000000,154428.000000,59125.000000,171.611930)}
{pt3dadd(176268.000000,154272.000000,59025.000000,189.343908)}
{pt3dadd(176124.000000,154248.000000,58900.000000,197.403638)}
{pt3dadd(176088.000000,154200.000000,58775.000000,205.045260)}
{pt3dadd(176028.000000,154212.000000,58650.000000,206.733780)}
{pt3dadd(175608.000000,154068.000000,58525.000000,196.316396)}
{pt3dadd(175428.000000,153972.000000,58400.000000,174.205122)}
{pt3dadd(175152.000000,153828.000000,58275.000000,162.173242)}
{pt3dadd(175200.000000,153804.000000,58100.000000,148.244840)}
{pt3dadd(175164.000000,153780.000000,58000.000000,139.245910)}
{pt3dadd(175152.000000,153672.000000,57875.000000,139.245910)}
{pt3dadd(175140.000000,153528.000000,57750.000000,137.922910)}
{pt3dadd(175032.000000,153432.000000,57650.000000,137.922910)}
{pt3dadd(175128.000000,153240.000000,57525.000000,130.519468)}
{pt3dadd(175260.000000,153096.000000,57425.000000,133.231618)}
{pt3dadd(175140.000000,153060.000000,57325.000000,127.800858)}
{pt3dadd(175080.000000,152988.000000,57200.000000,126.540858)}
{pt3dadd(175092.000000,152832.000000,57075.000000,133.503154)}
{pt3dadd(175056.000000,152424.000000,56975.000000,143.896742)}
{pt3dadd(175164.000000,152280.000000,56875.000000,149.207653)}
{pt3dadd(175080.000000,152076.000000,56750.000000,160.811480)}

{create adhoc29}
{access adhoc29}
{connect adhoc29(1), adhoc28(0)}
{nseg = 1}
{strdef color color = "White"}
{pt3dclear()}
{pt3dadd(175080.000000,152076.000000,56750.000000,160.811480)}
{pt3dadd(175032.000000,151944.000000,56625.000000,167.379863)}
{pt3dadd(175092.000000,151872.000000,56500.000000,178.931823)}
{pt3dadd(175080.000000,151776.000000,56375.000000,195.467360)}

{create adhoc30}
{access adhoc30}
{connect adhoc30(1), adhoc28(0)}
{nseg = 1}
{strdef color color = "White"}
{pt3dclear()}
{pt3dadd(175080.000000,152076.000000,56750.000000,160.811480)}
{pt3dadd(175104.000000,151548.000000,56800.000000,133.699063)}
{pt3dadd(175020.000000,151224.000000,56800.000000,173.214264)}
{pt3dadd(174984.000000,150876.000000,56775.000000,180.145440)}
{pt3dadd(174888.000000,150528.000000,56650.000000,191.058708)}
{pt3dadd(174876.000000,150360.000000,56400.000000,192.318708)}
{pt3dadd(174864.000000,150120.000000,56200.000000,165.539803)}
{pt3dadd(174864.000000,149868.000000,56000.000000,132.300000)}

{create adhoc31}
{access adhoc31}
{connect adhoc31(1), adhoc1(0)}
{nseg = 1}
{strdef color color = "White"}
{pt3dclear()}
{pt3dadd(170460.000000,157236.000000,52025.000000,186.159400)}
{pt3dadd(170544.000000,156900.000000,51525.000000,139.699180)}
{pt3dadd(170616.000000,156936.000000,51325.000000,126.624136)}
{pt3dadd(170616.000000,156852.000000,51100.000000,114.592256)}
{pt3dadd(170400.000000,156624.000000,50675.000000,118.971552)}
{pt3dadd(170328.000000,156420.000000,50550.000000,129.339074)}
{pt3dadd(170364.000000,156216.000000,50450.000000,139.706596)}
{pt3dadd(170292.000000,155892.000000,50225.000000,149.477006)}
{pt3dadd(170268.000000,155736.000000,50100.000000,147.134148)}
{pt3dadd(170292.000000,155688.000000,50000.000000,133.776480)}
{pt3dadd(170328.000000,155016.000000,49775.000000,126.373038)}
{pt3dadd(170208.000000,154872.000000,49550.000000,116.005516)}
{pt3dadd(170304.000000,154788.000000,49450.000000,100.144275)}
{pt3dadd(170280.000000,154524.000000,49225.000000,97.470842)}
{pt3dadd(170220.000000,154440.000000,49025.000000,89.545845)}
