# Supplementary material for: Full reconstruction of large lobula plate tangential cells in Drosophila from a 3D EM dataset
Source: PLoS One. 2018 Nov 28;13(11):e0207828. doi: 10.1371/journal.pone.0207828 (PMC6261601; doi:10.1371/journal.pone.0207828)
Supplement: S1 Dataset — (ZIP) [file pone.0207828.s001.zip › Diameter hoc/Zelle_55_fertig.hoc0001.hoc]

/* created with convertKnossosNmlToHoc.m */

{create adhoc1}
{access adhoc1}
{nseg = 1}
{strdef color color = "White"}
{pt3dclear()}
{pt3dadd(169128.000000,96780.000000,75825.000000,226.277900)}
{pt3dadd(169152.000000,96828.000000,75925.000000,223.738877)}
{pt3dadd(169284.000000,96900.000000,75950.000000,242.408486)}
{pt3dadd(169368.000000,96936.000000,75975.000000,260.832050)}
{pt3dadd(169488.000000,96996.000000,76050.000000,271.584576)}
{pt3dadd(169596.000000,97056.000000,76150.000000,290.249964)}
{pt3dadd(169728.000000,97092.000000,76150.000000,263.463707)}
{pt3dadd(169812.000000,97140.000000,76150.000000,223.549010)}
{pt3dadd(169896.000000,97200.000000,76150.000000,179.614726)}
{pt3dadd(169920.000000,97272.000000,76150.000000,138.712786)}
{pt3dadd(169944.000000,97368.000000,76150.000000,102.722634)}
{pt3dadd(169980.000000,97440.000000,76200.000000,102.722634)}
{pt3dadd(170004.000000,97524.000000,76150.000000,100.795159)}
{pt3dadd(170040.000000,97596.000000,76125.000000,100.795159)}
{pt3dadd(170112.000000,97656.000000,76100.000000,100.795159)}
{pt3dadd(170172.000000,97728.000000,76100.000000,99.758554)}
{pt3dadd(170244.000000,97752.000000,76150.000000,104.226451)}
{pt3dadd(170280.000000,97860.000000,76175.000000,103.330992)}
{pt3dadd(170352.000000,97896.000000,76150.000000,102.390760)}
{pt3dadd(170424.000000,97980.000000,76150.000000,102.390760)}
{pt3dadd(170544.000000,98052.000000,76225.000000,97.902802)}
{pt3dadd(170604.000000,98112.000000,76250.000000,88.946947)}
{pt3dadd(170676.000000,98148.000000,76275.000000,86.508392)}
{pt3dadd(170712.000000,98316.000000,76275.000000,82.437682)}
{pt3dadd(170796.000000,98424.000000,76275.000000,76.725125)}
{pt3dadd(170808.000000,98520.000000,76300.000000,76.725125)}
{pt3dadd(170844.000000,98628.000000,76350.000000,75.951594)}
{pt3dadd(170880.000000,98700.000000,76400.000000,78.390149)}
{pt3dadd(170928.000000,98784.000000,76450.000000,79.900376)}
{pt3dadd(170988.000000,98832.000000,76500.000000,83.777242)}
{pt3dadd(171060.000000,98892.000000,76525.000000,84.589449)}
{pt3dadd(171132.000000,98916.000000,76550.000000,89.850938)}
{pt3dadd(171204.000000,98952.000000,76575.000000,97.141769)}
{pt3dadd(171276.000000,98976.000000,76575.000000,106.097624)}
{pt3dadd(171372.000000,99048.000000,76575.000000,112.188455)}
{pt3dadd(171480.000000,99096.000000,76575.000000,234.135691)}
{pt3dadd(171588.000000,99144.000000,76550.000000,359.357360)}
{pt3dadd(171684.000000,99192.000000,76450.000000,480.111132)}
{pt3dadd(171768.000000,99240.000000,76450.000000,593.914720)}
{pt3dadd(171852.000000,99288.000000,76450.000000,708.918308)}
{pt3dadd(171972.000000,99324.000000,76450.000000,723.166172)}
{pt3dadd(172080.000000,99372.000000,76450.000000,716.215988)}
{pt3dadd(172176.000000,99384.000000,76450.000000,696.342562)}
{pt3dadd(172260.000000,99408.000000,76450.000000,697.225643)}
{pt3dadd(172344.000000,99444.000000,76475.000000,630.401730)}

{create adhoc2}
{access adhoc2}
{connect adhoc2(1), adhoc1(0)}
{nseg = 1}
{strdef color color = "White"}
{pt3dclear()}
{pt3dadd(172344.000000,99444.000000,76475.000000,630.401730)}
{pt3dadd(172452.000000,99420.000000,76350.000000,662.447157)}
{pt3dadd(172572.000000,99396.000000,76225.000000,655.933000)}
{pt3dadd(172632.000000,99396.000000,76050.000000,638.765606)}
{pt3dadd(172800.000000,99408.000000,75900.000000,619.838538)}
{pt3dadd(172932.000000,99360.000000,75825.000000,607.530698)}
{pt3dadd(172932.000000,99348.000000,75650.000000,589.504932)}
{pt3dadd(172956.000000,99300.000000,75500.000000,577.783180)}
{pt3dadd(172968.000000,99240.000000,75400.000000,577.783180)}
{pt3dadd(173016.000000,99132.000000,75250.000000,572.065254)}
{pt3dadd(173112.000000,99216.000000,75150.000000,572.065254)}
{pt3dadd(173220.000000,99300.000000,75025.000000,561.433272)}
{pt3dadd(173328.000000,99348.000000,74925.000000,555.987630)}
{pt3dadd(173460.000000,99396.000000,74925.000000,579.459038)}
{pt3dadd(173568.000000,99396.000000,74800.000000,591.180790)}
{pt3dadd(173688.000000,99444.000000,74700.000000,591.180790)}
{pt3dadd(173784.000000,99480.000000,74600.000000,613.534524)}
{pt3dadd(173880.000000,99516.000000,74475.000000,624.698092)}
{pt3dadd(174024.000000,99540.000000,74325.000000,612.390252)}
{pt3dadd(174144.000000,99540.000000,74200.000000,606.386426)}
{pt3dadd(174264.000000,99552.000000,74125.000000,618.694266)}
{pt3dadd(174360.000000,99552.000000,73975.000000,618.694266)}
{pt3dadd(174456.000000,99600.000000,73875.000000,618.694266)}
{pt3dadd(174540.000000,99636.000000,73750.000000,631.002106)}
{pt3dadd(174636.000000,99672.000000,73625.000000,631.002106)}
{pt3dadd(174732.000000,99684.000000,73500.000000,624.698092)}
{pt3dadd(174888.000000,99708.000000,73425.000000,618.694266)}
{pt3dadd(174960.000000,99744.000000,73300.000000,612.976340)}
{pt3dadd(175068.000000,99792.000000,73250.000000,612.976340)}
{pt3dadd(175140.000000,99828.000000,73100.000000,618.980166)}
{pt3dadd(175272.000000,99828.000000,72950.000000,618.980166)}
{pt3dadd(175368.000000,99792.000000,72825.000000,624.983992)}
{pt3dadd(175416.000000,99804.000000,72675.000000,630.701918)}
{pt3dadd(175524.000000,99780.000000,72650.000000,624.397904)}
{pt3dadd(175620.000000,99768.000000,72525.000000,612.676152)}
{pt3dadd(175728.000000,99744.000000,72375.000000,612.676152)}
{pt3dadd(175776.000000,99708.000000,72250.000000,612.676152)}
{pt3dadd(175800.000000,99720.000000,72075.000000,596.326244)}
{pt3dadd(175848.000000,99720.000000,71900.000000,573.972510)}
{pt3dadd(175776.000000,99708.000000,71775.000000,568.526868)}
{pt3dadd(175776.000000,99708.000000,71600.000000,562.523042)}
{pt3dadd(175788.000000,99720.000000,71450.000000,535.229952)}
{pt3dadd(175740.000000,99684.000000,71375.000000,530.290596)}
{pt3dadd(175728.000000,99624.000000,71250.000000,535.476936)}
{pt3dadd(175728.000000,99552.000000,71125.000000,535.476936)}
{pt3dadd(175764.000000,99480.000000,71000.000000,519.127028)}
{pt3dadd(175728.000000,99468.000000,70850.000000,529.252724)}
{pt3dadd(175716.000000,99408.000000,70700.000000,539.378420)}
{pt3dadd(175740.000000,99372.000000,70575.000000,524.548568)}
{pt3dadd(175776.000000,99348.000000,70425.000000,519.362228)}
{pt3dadd(175776.000000,99312.000000,70275.000000,519.362228)}
{pt3dadd(175740.000000,99300.000000,70125.000000,509.236532)}
{pt3dadd(175716.000000,99216.000000,69975.000000,499.110836)}
{pt3dadd(175776.000000,99168.000000,69825.000000,513.940688)}
{pt3dadd(175836.000000,99144.000000,69725.000000,513.940688)}
{pt3dadd(175896.000000,99108.000000,69625.000000,509.001332)}
{pt3dadd(175956.000000,99072.000000,69500.000000,524.572670)}
{pt3dadd(176016.000000,99048.000000,69350.000000,529.512026)}
{pt3dadd(176076.000000,99012.000000,69225.000000,534.957668)}
{pt3dadd(176100.000000,98964.000000,69100.000000,540.144008)}
{pt3dadd(176184.000000,98940.000000,68950.000000,561.433272)}
{pt3dadd(176208.000000,98940.000000,68850.000000,541.157778)}
{pt3dadd(176160.000000,98964.000000,68725.000000,541.157778)}
{pt3dadd(176160.000000,98928.000000,68600.000000,530.525796)}
{pt3dadd(176160.000000,98928.000000,68475.000000,525.339456)}
{pt3dadd(176208.000000,98880.000000,68350.000000,514.175888)}
{pt3dadd(176256.000000,98844.000000,68225.000000,529.005740)}
{pt3dadd(176280.000000,98808.000000,68100.000000,534.192080)}
{pt3dadd(176316.000000,98784.000000,67950.000000,534.192080)}
{pt3dadd(176388.000000,98736.000000,67825.000000,539.378420)}
{pt3dadd(176388.000000,98712.000000,67650.000000,562.849828)}
{pt3dadd(176448.000000,98688.000000,67500.000000,574.013396)}
{pt3dadd(176544.000000,98652.000000,67375.000000,591.180790)}
{pt3dadd(176616.000000,98628.000000,67250.000000,613.534524)}
{pt3dadd(176664.000000,98616.000000,67075.000000,603.408828)}
{pt3dadd(176628.000000,98568.000000,66925.000000,574.751080)}
{pt3dadd(176724.000000,98520.000000,66775.000000,574.751080)}
{pt3dadd(176760.000000,98520.000000,66625.000000,581.055094)}
{pt3dadd(176820.000000,98484.000000,66450.000000,587.359108)}
{pt3dadd(176868.000000,98448.000000,66275.000000,620.956212)}
{pt3dadd(176916.000000,98400.000000,66125.000000,649.613960)}
{pt3dadd(176832.000000,98436.000000,66025.000000,649.613960)}
{pt3dadd(176748.000000,98484.000000,65900.000000,637.306120)}
{pt3dadd(176748.000000,98484.000000,65725.000000,624.998280)}
{pt3dadd(176784.000000,98448.000000,65550.000000,606.972514)}
{pt3dadd(176868.000000,98388.000000,65425.000000,594.664674)}
{pt3dadd(176952.000000,98328.000000,65325.000000,594.664674)}
{pt3dadd(177036.000000,98268.000000,65200.000000,600.668500)}
{pt3dadd(177084.000000,98208.000000,65050.000000,600.668500)}
{pt3dadd(177168.000000,98124.000000,64975.000000,595.222858)}
{pt3dadd(177312.000000,98100.000000,64900.000000,589.504932)}
{pt3dadd(177444.000000,98064.000000,64775.000000,572.246777)}
{pt3dadd(177552.000000,98076.000000,64625.000000,571.792970)}

{create adhoc3}
{access adhoc3}
{connect adhoc3(1), adhoc2(0)}
{nseg = 1}
{strdef color color = "White"}
{pt3dclear()}
{pt3dadd(177552.000000,98076.000000,64625.000000,571.792970)}
{pt3dadd(177624.000000,98088.000000,64700.000000,512.048250)}
{pt3dadd(177756.000000,98124.000000,64700.000000,450.323956)}
{pt3dadd(177888.000000,98160.000000,64700.000000,375.058834)}
{pt3dadd(178020.000000,98196.000000,64700.000000,308.433874)}
{pt3dadd(178152.000000,98232.000000,64700.000000,255.398918)}
{pt3dadd(178284.000000,98268.000000,64700.000000,211.110916)}
{pt3dadd(178416.000000,98304.000000,64700.000000,190.583936)}
{pt3dadd(178548.000000,98340.000000,64700.000000,188.722344)}
{pt3dadd(178680.000000,98376.000000,64700.000000,190.330458)}
{pt3dadd(178812.000000,98400.000000,64700.000000,226.684714)}
{pt3dadd(178944.000000,98436.000000,64650.000000,235.530844)}
{pt3dadd(179064.000000,98472.000000,64650.000000,233.757894)}
{pt3dadd(179196.000000,98508.000000,64650.000000,231.984944)}
{pt3dadd(179328.000000,98508.000000,64650.000000,237.308006)}
{pt3dadd(179496.000000,98532.000000,64600.000000,200.953750)}
{pt3dadd(179676.000000,98568.000000,64600.000000,192.107620)}
{pt3dadd(179844.000000,98592.000000,64600.000000,199.749242)}
{pt3dadd(180036.000000,98640.000000,64600.000000,203.383784)}
{pt3dadd(180096.000000,98664.000000,64575.000000,203.383784)}
{pt3dadd(180228.000000,98724.000000,64475.000000,199.567520)}
{pt3dadd(180324.000000,98748.000000,64450.000000,197.612848)}
{pt3dadd(180432.000000,98796.000000,64450.000000,195.560440)}
{pt3dadd(180540.000000,98832.000000,64450.000000,206.361242)}
{pt3dadd(180660.000000,98892.000000,64425.000000,212.523350)}
{pt3dadd(180804.000000,98964.000000,64425.000000,225.185744)}
{pt3dadd(180948.000000,99036.000000,64425.000000,243.851132)}
{pt3dadd(181104.000000,99108.000000,64425.000000,257.811428)}
{pt3dadd(181248.000000,99192.000000,64425.000000,260.306144)}
{pt3dadd(181368.000000,99276.000000,64425.000000,270.059004)}
{pt3dadd(181488.000000,99372.000000,64425.000000,275.173170)}
{pt3dadd(181608.000000,99468.000000,64425.000000,275.173170)}
{pt3dadd(181728.000000,99564.000000,64425.000000,272.553720)}
{pt3dadd(181848.000000,99660.000000,64425.000000,272.553720)}
{pt3dadd(181980.000000,99756.000000,64425.000000,262.800860)}
{pt3dadd(182100.000000,99840.000000,64425.000000,255.310780)}
{pt3dadd(182232.000000,99936.000000,64425.000000,242.807500)}
{pt3dadd(182316.000000,99984.000000,64450.000000,233.519062)}
{pt3dadd(182412.000000,100044.000000,64450.000000,228.648432)}
{pt3dadd(182460.000000,100068.000000,64450.000000,233.287126)}
{pt3dadd(182496.000000,100116.000000,64450.000000,233.287126)}
{pt3dadd(182568.000000,100200.000000,64500.000000,235.549906)}
{pt3dadd(182652.000000,100284.000000,64525.000000,237.704934)}
{pt3dadd(182724.000000,100368.000000,64575.000000,229.280046)}
{pt3dadd(182796.000000,100464.000000,64575.000000,218.479244)}
{pt3dadd(182868.000000,100560.000000,64575.000000,237.823988)}
{pt3dadd(182952.000000,100656.000000,64575.000000,253.984772)}
{pt3dadd(183048.000000,100692.000000,64575.000000,266.488052)}
{pt3dadd(183096.000000,100764.000000,64600.000000,291.073724)}
{pt3dadd(183180.000000,100860.000000,64675.000000,312.627052)}
{pt3dadd(183252.000000,100896.000000,64700.000000,306.410748)}
{pt3dadd(183348.000000,100944.000000,64700.000000,303.378404)}
{pt3dadd(183408.000000,100944.000000,64700.000000,300.627984)}
{pt3dadd(183588.000000,101592.000000,64900.000000,282.204420)}
{pt3dadd(183840.000000,101688.000000,65125.000000,271.451894)}
{pt3dadd(184056.000000,101952.000000,65300.000000,237.265094)}
{pt3dadd(184164.000000,102228.000000,65475.000000,215.711766)}
{pt3dadd(184440.000000,102732.000000,65650.000000,205.958906)}
{pt3dadd(184764.000000,103080.000000,65775.000000,187.163326)}
{pt3dadd(184992.000000,103464.000000,65925.000000,182.524632)}
{pt3dadd(186312.000000,103368.000000,66075.000000,199.165184)}
{pt3dadd(186576.000000,103716.000000,66375.000000,212.460702)}
{pt3dadd(186936.000000,104268.000000,66500.000000,202.664052)}
{pt3dadd(186540.000000,105372.000000,66650.000000,208.366348)}
{pt3dadd(186804.000000,105624.000000,66900.000000,189.570768)}
{pt3dadd(186960.000000,105612.000000,67150.000000,164.379385)}
{pt3dadd(187044.000000,105684.000000,67425.000000,133.759103)}
{pt3dadd(187164.000000,105840.000000,67650.000000,127.472323)}
{pt3dadd(187236.000000,105912.000000,67975.000000,134.403499)}
{pt3dadd(187356.000000,106092.000000,68275.000000,147.036971)}
{pt3dadd(187404.000000,106260.000000,68500.000000,168.221274)}
{pt3dadd(187596.000000,106500.000000,68675.000000,195.467360)}
{pt3dadd(187872.000000,106608.000000,68925.000000,195.467360)}

{create adhoc4}
{access adhoc4}
{connect adhoc4(1), adhoc2(0)}
{nseg = 1}
{strdef color color = "White"}
{pt3dclear()}
{pt3dadd(177552.000000,98076.000000,64625.000000,571.792970)}
{pt3dadd(177612.000000,98004.000000,64500.000000,582.253153)}
{pt3dadd(177684.000000,97932.000000,64375.000000,589.790832)}
{pt3dadd(177660.000000,97860.000000,64250.000000,589.790832)}
{pt3dadd(177660.000000,97740.000000,64150.000000,572.623438)}
{pt3dadd(177648.000000,97620.000000,64000.000000,578.069080)}
{pt3dadd(177660.000000,97524.000000,63925.000000,555.715346)}
{pt3dadd(177672.000000,97392.000000,63850.000000,555.715346)}
{pt3dadd(177660.000000,97284.000000,63750.000000,540.144008)}
{pt3dadd(177636.000000,97188.000000,63675.000000,534.957668)}
{pt3dadd(177540.000000,97128.000000,63525.000000,540.675594)}
{pt3dadd(177468.000000,97044.000000,63400.000000,557.025502)}
{pt3dadd(177420.000000,96948.000000,63275.000000,568.747254)}
{pt3dadd(177444.000000,96900.000000,63175.000000,564.043098)}
{pt3dadd(177432.000000,96840.000000,63050.000000,554.399586)}
{pt3dadd(177360.000000,96780.000000,62900.000000,523.926020)}
{pt3dadd(177264.000000,96732.000000,62800.000000,497.932600)}
{pt3dadd(177156.000000,96696.000000,62675.000000,491.928774)}
{pt3dadd(177060.000000,96648.000000,62575.000000,496.632930)}
{pt3dadd(177096.000000,96636.000000,62450.000000,496.632930)}
{pt3dadd(177156.000000,96624.000000,62325.000000,496.632930)}
{pt3dadd(177216.000000,96624.000000,62225.000000,501.337086)}
{pt3dadd(177336.000000,96624.000000,62100.000000,475.343666)}
{pt3dadd(177408.000000,96660.000000,61975.000000,475.343666)}
{pt3dadd(177468.000000,96708.000000,61825.000000,484.987178)}
{pt3dadd(177456.000000,96768.000000,61675.000000,504.297176)}
{pt3dadd(177432.000000,96804.000000,61550.000000,514.422872)}
{pt3dadd(177504.000000,96828.000000,61350.000000,534.698366)}
{pt3dadd(177588.000000,96840.000000,61225.000000,662.333310)}
{pt3dadd(177624.000000,96876.000000,61075.000000,749.489577)}
{pt3dadd(177636.000000,96900.000000,60925.000000,1132.111000)}

{create adhoc5}
{access adhoc5}
{connect adhoc5(1), adhoc4(0)}
{nseg = 1}
{strdef color color = "White"}
{pt3dclear()}
{pt3dadd(177636.000000,96900.000000,60925.000000,1132.111000)}
{pt3dadd(177564.000000,96852.000000,60875.000000,742.143293)}
{pt3dadd(177504.000000,96768.000000,60775.000000,604.338694)}
{pt3dadd(177480.000000,96792.000000,60625.000000,463.252640)}
{pt3dadd(177480.000000,96732.000000,60525.000000,420.578520)}
{pt3dadd(177528.000000,96660.000000,60400.000000,388.654368)}
{pt3dadd(177480.000000,96600.000000,60275.000000,380.720622)}
{pt3dadd(177468.000000,96504.000000,60150.000000,377.210306)}
{pt3dadd(177456.000000,96468.000000,59975.000000,373.146676)}
{pt3dadd(177444.000000,96456.000000,59825.000000,373.146676)}
{pt3dadd(177372.000000,96408.000000,59675.000000,387.556088)}
{pt3dadd(177324.000000,96336.000000,59575.000000,391.426204)}
{pt3dadd(177312.000000,96240.000000,59450.000000,406.556094)}
{pt3dadd(177312.000000,96144.000000,59350.000000,414.886532)}
{pt3dadd(177312.000000,96120.000000,59175.000000,427.087086)}
{pt3dadd(177264.000000,96096.000000,59050.000000,427.087086)}
{pt3dadd(177168.000000,96096.000000,58925.000000,435.417524)}
{pt3dadd(177060.000000,96096.000000,58850.000000,444.164478)}
{pt3dadd(177000.000000,96096.000000,58700.000000,453.348780)}
{pt3dadd(176940.000000,96108.000000,58550.000000,445.018342)}
{pt3dadd(176856.000000,96108.000000,58450.000000,453.348780)}
{pt3dadd(176784.000000,96108.000000,58275.000000,467.472438)}
{pt3dadd(176700.000000,96144.000000,58150.000000,462.992292)}
{pt3dadd(176616.000000,96180.000000,57975.000000,453.807990)}
{pt3dadd(176532.000000,96204.000000,57875.000000,471.322730)}
{pt3dadd(176520.000000,96252.000000,57750.000000,463.321940)}
{pt3dadd(176484.000000,96324.000000,57600.000000,493.936280)}

{create adhoc6}
{access adhoc6}
{connect adhoc6(1), adhoc5(0)}
{nseg = 1}
{strdef color color = "White"}
{pt3dclear()}
{pt3dadd(176484.000000,96324.000000,57600.000000,493.936280)}
{pt3dadd(176424.000000,96372.000000,57450.000000,470.788850)}
{pt3dadd(176364.000000,96432.000000,57325.000000,470.639510)}
{pt3dadd(176292.000000,96456.000000,57175.000000,457.188400)}
{pt3dadd(176280.000000,96444.000000,57025.000000,444.377816)}
{pt3dadd(176232.000000,96492.000000,56925.000000,424.981118)}
{pt3dadd(176172.000000,96552.000000,56800.000000,408.300418)}
{pt3dadd(176232.000000,96600.000000,56650.000000,381.080422)}
{pt3dadd(176256.000000,96648.000000,56475.000000,373.146676)}
{pt3dadd(176304.000000,96636.000000,56350.000000,373.146676)}
{pt3dadd(176316.000000,96564.000000,56225.000000,384.212936)}
{pt3dadd(176328.000000,96468.000000,56125.000000,400.893636)}
{pt3dadd(176328.000000,96420.000000,55975.000000,419.366678)}
{pt3dadd(176364.000000,96432.000000,55825.000000,423.236794)}
{pt3dadd(176328.000000,96444.000000,55650.000000,431.567232)}
{pt3dadd(176316.000000,96372.000000,55525.000000,464.653310)}
{pt3dadd(176256.000000,96372.000000,55375.000000,474.296822)}
{pt3dadd(176196.000000,96372.000000,55225.000000,503.319270)}
{pt3dadd(176136.000000,96360.000000,55025.000000,554.073000)}
{pt3dadd(176040.000000,96336.000000,54825.000000,571.792970)}

{create adhoc7}
{access adhoc7}
{connect adhoc7(1), adhoc6(0)}
{nseg = 1}
{strdef color color = "White"}
{pt3dclear()}
{pt3dadd(176040.000000,96336.000000,54825.000000,571.792970)}
{pt3dadd(176076.000000,96264.000000,54750.000000,650.922617)}
{pt3dadd(176124.000000,96192.000000,54650.000000,584.346662)}
{pt3dadd(176196.000000,96120.000000,54575.000000,540.194324)}
{pt3dadd(176268.000000,96048.000000,54525.000000,511.613324)}
{pt3dadd(176340.000000,95988.000000,54475.000000,407.922176)}
{pt3dadd(176460.000000,95976.000000,54400.000000,377.448610)}
{pt3dadd(176568.000000,96000.000000,54325.000000,361.490898)}
{pt3dadd(176676.000000,96036.000000,54250.000000,346.293082)}
{pt3dadd(176784.000000,96060.000000,54175.000000,333.845686)}
{pt3dadd(176904.000000,96096.000000,54050.000000,326.992218)}
{pt3dadd(176988.000000,96132.000000,53975.000000,304.252368)}
{pt3dadd(177084.000000,96168.000000,53850.000000,313.356612)}
{pt3dadd(177192.000000,96192.000000,53750.000000,318.994972)}
{pt3dadd(177288.000000,96228.000000,53675.000000,331.442368)}
{pt3dadd(177384.000000,96264.000000,53600.000000,334.785520)}
{pt3dadd(177432.000000,96276.000000,53450.000000,341.638988)}
{pt3dadd(177480.000000,96348.000000,53375.000000,364.378838)}
{pt3dadd(177516.000000,96420.000000,53250.000000,381.134438)}
{pt3dadd(177624.000000,96456.000000,53150.000000,409.715438)}
{pt3dadd(177756.000000,96504.000000,53050.000000,438.296438)}
{pt3dadd(177888.000000,96552.000000,52950.000000,463.367122)}
{pt3dadd(178020.000000,96600.000000,52900.000000,463.367122)}
{pt3dadd(178068.000000,96696.000000,52775.000000,463.367122)}
{pt3dadd(178140.000000,96744.000000,52700.000000,445.852382)}
{pt3dadd(178260.000000,96792.000000,52575.000000,432.401272)}
{pt3dadd(178392.000000,96828.000000,52450.000000,418.950162)}
{pt3dadd(178512.000000,96864.000000,52350.000000,414.683354)}
{pt3dadd(178620.000000,96876.000000,52250.000000,414.683354)}
{pt3dadd(178716.000000,96948.000000,52075.000000,407.127410)}
{pt3dadd(178848.000000,97020.000000,51950.000000,415.874364)}
{pt3dadd(179004.000000,97104.000000,51900.000000,415.874364)}
{pt3dadd(179184.000000,97176.000000,51850.000000,404.254790)}
{pt3dadd(179352.000000,97200.000000,51825.000000,397.058646)}
{pt3dadd(179544.000000,97212.000000,51750.000000,393.548330)}
{pt3dadd(179736.000000,97236.000000,51650.000000,369.671486)}
{pt3dadd(179832.000000,97236.000000,51650.000000,351.198444)}
{pt3dadd(179964.000000,97248.000000,51675.000000,351.198444)}
{pt3dadd(180096.000000,97296.000000,51600.000000,379.779444)}
{pt3dadd(180228.000000,97404.000000,51600.000000,390.845704)}
{pt3dadd(180348.000000,97500.000000,51600.000000,419.426704)}
{pt3dadd(180456.000000,97584.000000,51475.000000,426.280172)}
{pt3dadd(180564.000000,97680.000000,51475.000000,437.899746)}
{pt3dadd(180636.000000,97728.000000,51475.000000,448.025442)}
{pt3dadd(180720.000000,97836.000000,51500.000000,465.540182)}
{pt3dadd(180780.000000,97896.000000,51500.000000,481.111520)}
{pt3dadd(180852.000000,97980.000000,51500.000000,506.182204)}
{pt3dadd(180924.000000,98064.000000,51500.000000,519.633314)}
{pt3dadd(180984.000000,98148.000000,51500.000000,530.796882)}
{pt3dadd(181032.000000,98220.000000,51500.000000,521.612580)}
{pt3dadd(181116.000000,98304.000000,51500.000000,492.590132)}
{pt3dadd(181212.000000,98388.000000,51500.000000,475.075392)}
{pt3dadd(181332.000000,98472.000000,51500.000000,427.019360)}
{pt3dadd(181464.000000,98556.000000,51500.000000,406.362580)}

{create adhoc8}
{access adhoc8}
{connect adhoc8(1), adhoc7(0)}
{nseg = 1}
{strdef color color = "White"}
{pt3dclear()}
{pt3dadd(181464.000000,98556.000000,51500.000000,406.362580)}
{pt3dadd(181596.000000,98652.000000,51500.000000,413.135297)}
{pt3dadd(181740.000000,98736.000000,51500.000000,415.680850)}
{pt3dadd(181872.000000,98820.000000,51500.000000,408.124906)}
{pt3dadd(182028.000000,98904.000000,51500.000000,412.391714)}
{pt3dadd(182136.000000,98952.000000,51525.000000,412.391714)}
{pt3dadd(182256.000000,99036.000000,51525.000000,424.011288)}
{pt3dadd(182364.000000,99120.000000,51525.000000,407.330588)}
{pt3dadd(182472.000000,99216.000000,51525.000000,423.216970)}
{pt3dadd(182568.000000,99312.000000,51525.000000,414.886532)}
{pt3dadd(182676.000000,99408.000000,51525.000000,423.216970)}
{pt3dadd(182796.000000,99456.000000,51525.000000,431.963924)}
{pt3dadd(182916.000000,99552.000000,51525.000000,441.597617)}
{pt3dadd(182988.000000,99672.000000,51575.000000,470.415500)}

{create adhoc9}
{access adhoc9}
{connect adhoc9(1), adhoc8(0)}
{nseg = 1}
{strdef color color = "White"}
{pt3dclear()}
{pt3dadd(182988.000000,99672.000000,51575.000000,470.415500)}
{pt3dadd(183048.000000,99780.000000,51675.000000,421.263360)}
{pt3dadd(183120.000000,99864.000000,51675.000000,416.077542)}
{pt3dadd(183180.000000,99960.000000,51675.000000,403.266958)}
{pt3dadd(183276.000000,100068.000000,51675.000000,411.597396)}
{pt3dadd(183372.000000,100164.000000,51675.000000,419.531142)}
{pt3dadd(183468.000000,100272.000000,51675.000000,435.417524)}
{pt3dadd(183540.000000,100368.000000,51675.000000,439.897670)}
{pt3dadd(183600.000000,100476.000000,51675.000000,436.027554)}
{pt3dadd(183672.000000,100572.000000,51675.000000,436.027554)}
{pt3dadd(183732.000000,100680.000000,51675.000000,459.604360)}
{pt3dadd(183804.000000,100776.000000,51675.000000,484.360000)}
{pt3dadd(183864.000000,100884.000000,51675.000000,499.189852)}
{pt3dadd(183912.000000,101004.000000,51775.000000,567.741224)}
{pt3dadd(183960.000000,101136.000000,51775.000000,541.817414)}
{pt3dadd(184008.000000,101268.000000,51775.000000,482.798736)}
{pt3dadd(184044.000000,101352.000000,51850.000000,429.086942)}
{pt3dadd(184104.000000,101424.000000,51850.000000,372.562980)}
{pt3dadd(184164.000000,101484.000000,51925.000000,281.617648)}
{pt3dadd(184236.000000,101580.000000,51925.000000,284.801608)}
{pt3dadd(184296.000000,101664.000000,51950.000000,287.296324)}
{pt3dadd(184332.000000,101724.000000,52000.000000,290.328668)}
{pt3dadd(184380.000000,101808.000000,51925.000000,298.586478)}
{pt3dadd(184596.000000,102084.000000,52200.000000,298.586478)}
{pt3dadd(184848.000000,102348.000000,52200.000000,289.482234)}
{pt3dadd(184956.000000,102696.000000,52200.000000,297.740044)}
{pt3dadd(185148.000000,102804.000000,52350.000000,289.069340)}
{pt3dadd(185280.000000,103044.000000,52475.000000,280.811530)}
{pt3dadd(185424.000000,103140.000000,52525.000000,280.811530)}
{pt3dadd(185580.000000,103296.000000,52425.000000,280.811530)}
{pt3dadd(185688.000000,103524.000000,52575.000000,265.420310)}
{pt3dadd(185796.000000,103764.000000,52575.000000,251.460014)}
{pt3dadd(185916.000000,103968.000000,52550.000000,244.326604)}
{pt3dadd(186036.000000,104148.000000,52475.000000,239.212438)}
{pt3dadd(186060.000000,104364.000000,52475.000000,239.212438)}
{pt3dadd(186156.000000,104604.000000,52475.000000,254.603658)}
{pt3dadd(186228.000000,104796.000000,52475.000000,265.944504)}
{pt3dadd(186168.000000,105000.000000,52475.000000,265.944504)}
{pt3dadd(186060.000000,105336.000000,52350.000000,268.439220)}
{pt3dadd(186024.000000,105612.000000,52350.000000,263.069350)}
{pt3dadd(186036.000000,105840.000000,52350.000000,254.811540)}
{pt3dadd(186072.000000,106080.000000,52350.000000,272.628806)}
{pt3dadd(186036.000000,106356.000000,52350.000000,308.645742)}
{pt3dadd(186024.000000,106596.000000,52350.000000,345.859706)}
{pt3dadd(186024.000000,106836.000000,51975.000000,397.197328)}
{pt3dadd(186228.000000,107028.000000,51800.000000,392.326698)}
{pt3dadd(186396.000000,107124.000000,51925.000000,367.376022)}
{pt3dadd(186540.000000,107292.000000,51925.000000,352.966610)}
{pt3dadd(186648.000000,107652.000000,51925.000000,344.636172)}
{pt3dadd(186708.000000,107928.000000,51925.000000,301.556360)}
{pt3dadd(186756.000000,108024.000000,51900.000000,311.796860)}
{pt3dadd(186768.000000,108156.000000,51900.000000,336.747536)}
{pt3dadd(186840.000000,108360.000000,51900.000000,333.563576)}
{pt3dadd(186948.000000,108552.000000,51900.000000,302.185334)}
{pt3dadd(187056.000000,108744.000000,51900.000000,296.546974)}
{pt3dadd(187188.000000,108912.000000,51900.000000,284.043694)}
{pt3dadd(187344.000000,109044.000000,51900.000000,252.930910)}
{pt3dadd(187452.000000,109224.000000,51900.000000,236.770126)}
{pt3dadd(187656.000000,109500.000000,51850.000000,232.131432)}
{pt3dadd(187620.000000,109668.000000,51825.000000,240.802136)}
{pt3dadd(187644.000000,109776.000000,51850.000000,253.305416)}
{pt3dadd(187716.000000,109872.000000,51800.000000,277.891088)}
{pt3dadd(187692.000000,109980.000000,51775.000000,288.131588)}
{pt3dadd(187656.000000,110112.000000,51775.000000,306.555152)}
{pt3dadd(187740.000000,110304.000000,51750.000000,320.278408)}
{pt3dadd(187800.000000,110424.000000,51750.000000,356.602648)}
{pt3dadd(188124.000000,110544.000000,51800.000000,407.282098)}
{pt3dadd(188280.000000,110592.000000,51925.000000,426.925638)}
{pt3dadd(188424.000000,110592.000000,51900.000000,430.109598)}
{pt3dadd(188532.000000,110532.000000,52000.000000,413.353998)}
{pt3dadd(188640.000000,110520.000000,52125.000000,341.520507)}
{pt3dadd(188760.000000,110460.000000,52200.000000,303.234000)}

{create adhoc10}
{access adhoc10}
{connect adhoc10(1), adhoc8(0)}
{nseg = 1}
{strdef color color = "White"}
{pt3dclear()}
{pt3dadd(182988.000000,99672.000000,51575.000000,470.415500)}
{pt3dadd(183060.000000,99780.000000,51550.000000,465.137047)}
{pt3dadd(183156.000000,99900.000000,51525.000000,460.211240)}
{pt3dadd(183288.000000,99924.000000,51475.000000,460.211240)}
{pt3dadd(183360.000000,100056.000000,51450.000000,450.567728)}
{pt3dadd(183444.000000,100152.000000,51375.000000,478.208164)}
{pt3dadd(183528.000000,100260.000000,51325.000000,473.268808)}
{pt3dadd(183636.000000,100296.000000,51300.000000,489.949508)}
{pt3dadd(183744.000000,100332.000000,51300.000000,485.469362)}
{pt3dadd(183792.000000,100428.000000,51375.000000,476.722408)}
{pt3dadd(183852.000000,100536.000000,51400.000000,466.596712)}
{pt3dadd(183972.000000,100632.000000,51325.000000,453.145602)}
{pt3dadd(183996.000000,100752.000000,51325.000000,453.145602)}
{pt3dadd(184032.000000,100872.000000,51300.000000,502.546236)}
{pt3dadd(184092.000000,100932.000000,51325.000000,556.213678)}
{pt3dadd(184200.000000,101004.000000,51225.000000,571.785016)}
{pt3dadd(184308.000000,101064.000000,51225.000000,590.175482)}
{pt3dadd(184416.000000,101136.000000,51225.000000,590.175482)}
{pt3dadd(184524.000000,101196.000000,51225.000000,545.254994)}
{pt3dadd(184560.000000,101280.000000,51200.000000,500.334506)}
{pt3dadd(184656.000000,101208.000000,51125.000000,475.578866)}
{pt3dadd(184752.000000,101208.000000,51000.000000,442.058510)}
{pt3dadd(184836.000000,101208.000000,50900.000000,395.493770)}
{pt3dadd(184932.000000,101232.000000,50800.000000,359.169530)}
{pt3dadd(185040.000000,101244.000000,50725.000000,314.980704)}
{pt3dadd(185124.000000,101340.000000,50650.000000,258.619157)}
{pt3dadd(185244.000000,101412.000000,50600.000000,249.471370)}

{create adhoc11}
{access adhoc11}
{connect adhoc11(1), adhoc7(0)}
{nseg = 1}
{strdef color color = "White"}
{pt3dclear()}
{pt3dadd(181464.000000,98556.000000,51500.000000,406.362580)}
{pt3dadd(181188.000000,98124.000000,51200.000000,465.137047)}
{pt3dadd(181200.000000,98256.000000,50950.000000,369.701140)}
{pt3dadd(181332.000000,98676.000000,50875.000000,338.322898)}
{pt3dadd(181236.000000,98880.000000,50650.000000,234.188643)}
{pt3dadd(181188.000000,99132.000000,50375.000000,249.471370)}

{create adhoc12}
{access adhoc12}
{connect adhoc12(1), adhoc6(0)}
{nseg = 1}
{strdef color color = "White"}
{pt3dclear()}
{pt3dadd(176040.000000,96336.000000,54825.000000,571.792970)}
{pt3dadd(175956.000000,96372.000000,54925.000000,562.716900)}
{pt3dadd(175884.000000,96432.000000,54800.000000,492.619228)}
{pt3dadd(175764.000000,96492.000000,54725.000000,433.269074)}
{pt3dadd(175632.000000,96540.000000,54725.000000,368.804754)}
{pt3dadd(175512.000000,96588.000000,54725.000000,300.939946)}
{pt3dadd(175440.000000,96624.000000,54675.000000,258.760902)}
{pt3dadd(175320.000000,96672.000000,54675.000000,220.503260)}
{pt3dadd(175284.000000,96732.000000,54600.000000,213.013180)}
{pt3dadd(175224.000000,96804.000000,54550.000000,202.212378)}
{pt3dadd(175152.000000,96864.000000,54525.000000,204.264786)}
{pt3dadd(175032.000000,96900.000000,54525.000000,212.689674)}
{pt3dadd(174948.000000,96948.000000,54500.000000,232.239184)}
{pt3dadd(174888.000000,96996.000000,54500.000000,234.615098)}
{pt3dadd(174816.000000,97044.000000,54425.000000,253.280486)}
{pt3dadd(174696.000000,97068.000000,54425.000000,267.938794)}
{pt3dadd(174600.000000,97104.000000,54350.000000,270.314708)}
{pt3dadd(174504.000000,97140.000000,54250.000000,289.022840)}
{pt3dadd(174408.000000,97188.000000,54175.000000,278.222038)}
{pt3dadd(174300.000000,97236.000000,54100.000000,259.556650)}
{pt3dadd(174204.000000,97272.000000,53975.000000,244.898342)}
{pt3dadd(174108.000000,97260.000000,53925.000000,234.097540)}
{pt3dadd(174000.000000,97260.000000,53925.000000,207.899328)}
{pt3dadd(173928.000000,97296.000000,53875.000000,214.061436)}
{pt3dadd(173868.000000,97320.000000,53800.000000,224.862238)}
{pt3dadd(173820.000000,97356.000000,53675.000000,224.862238)}
{pt3dadd(173832.000000,97380.000000,53575.000000,226.816910)}
{pt3dadd(173820.000000,97416.000000,53500.000000,222.399102)}
{pt3dadd(173736.000000,97464.000000,53400.000000,220.244074)}
{pt3dadd(173688.000000,97524.000000,53300.000000,207.581680)}
{pt3dadd(173688.000000,97596.000000,53225.000000,203.574600)}
{pt3dadd(173652.000000,97656.000000,53175.000000,196.296866)}
{pt3dadd(173592.000000,97704.000000,53100.000000,203.090588)}
{pt3dadd(173556.000000,97728.000000,52950.000000,205.245616)}
{pt3dadd(173532.000000,97776.000000,52800.000000,215.532096)}
{pt3dadd(173448.000000,97812.000000,52675.000000,223.956984)}
{pt3dadd(173412.000000,97860.000000,52525.000000,240.080848)}
{pt3dadd(173412.000000,97920.000000,52375.000000,235.442154)}
{pt3dadd(173400.000000,98028.000000,52275.000000,231.234718)}
{pt3dadd(173448.000000,98124.000000,52175.000000,222.809830)}
{pt3dadd(173376.000000,98208.000000,52050.000000,233.050330)}
{pt3dadd(173328.000000,98268.000000,51950.000000,230.674416)}
{pt3dadd(173304.000000,98400.000000,51850.000000,243.177696)}
{pt3dadd(173280.000000,98520.000000,51800.000000,254.518542)}
{pt3dadd(173292.000000,98664.000000,51725.000000,265.319344)}
{pt3dadd(173292.000000,98784.000000,51700.000000,250.661036)}
{pt3dadd(173316.000000,98892.000000,51600.000000,244.190820)}
{pt3dadd(173328.000000,99000.000000,51600.000000,238.820950)}
{pt3dadd(173364.000000,99108.000000,51575.000000,229.532512)}
{pt3dadd(173388.000000,99216.000000,51550.000000,222.738790)}
{pt3dadd(173448.000000,99324.000000,51475.000000,229.532512)}
{pt3dadd(173508.000000,99456.000000,51425.000000,233.739948)}
{pt3dadd(173556.000000,99600.000000,51325.000000,224.451510)}
{pt3dadd(173592.000000,99684.000000,51300.000000,224.451510)}
{pt3dadd(173616.000000,99768.000000,51225.000000,228.869318)}
{pt3dadd(173640.000000,99876.000000,51150.000000,233.983484)}
{pt3dadd(173628.000000,99960.000000,51025.000000,241.116894)}
{pt3dadd(173556.000000,100068.000000,51000.000000,253.024782)}
{pt3dadd(173556.000000,100200.000000,50975.000000,262.313220)}
{pt3dadd(173556.000000,100320.000000,50950.000000,262.313220)}
{pt3dadd(173532.000000,100416.000000,50875.000000,248.352924)}
{pt3dadd(173496.000000,100500.000000,50825.000000,245.858208)}
{pt3dadd(173436.000000,100596.000000,50875.000000,238.368128)}
{pt3dadd(173412.000000,100680.000000,50825.000000,238.368128)}
{pt3dadd(173388.000000,100788.000000,50825.000000,240.744042)}
{pt3dadd(173352.000000,100896.000000,50825.000000,266.559002)}
{pt3dadd(173340.000000,101028.000000,50825.000000,277.311528)}
{pt3dadd(173316.000000,101172.000000,50825.000000,277.311528)}
{pt3dadd(173304.000000,101304.000000,50825.000000,279.930978)}
{pt3dadd(173256.000000,101448.000000,50725.000000,290.683504)}
{pt3dadd(173220.000000,101556.000000,50725.000000,284.467200)}
{pt3dadd(173196.000000,101676.000000,50725.000000,290.683504)}
{pt3dadd(173160.000000,101796.000000,50725.000000,328.501290)}
{pt3dadd(173136.000000,101916.000000,50725.000000,347.209422)}
{pt3dadd(173124.000000,102048.000000,50575.000000,380.645722)}
{pt3dadd(173100.000000,102132.000000,50425.000000,369.893196)}
{pt3dadd(173052.000000,102228.000000,50300.000000,352.924366)}
{pt3dadd(173052.000000,102300.000000,50150.000000,306.681692)}
{pt3dadd(173148.000000,102348.000000,50050.000000,287.973560)}
{pt3dadd(173232.000000,102396.000000,49975.000000,232.983932)}
{pt3dadd(173244.000000,102456.000000,49875.000000,238.098098)}
{pt3dadd(173304.000000,102480.000000,49800.000000,231.304376)}
{pt3dadd(173376.000000,102528.000000,49675.000000,231.304376)}
{pt3dadd(173448.000000,102540.000000,49575.000000,204.078936)}
{pt3dadd(173544.000000,102552.000000,49500.000000,194.157614)}
{pt3dadd(173628.000000,102648.000000,49400.000000,182.249726)}
{pt3dadd(173760.000000,102720.000000,49300.000000,174.608104)}
{pt3dadd(173868.000000,102744.000000,49225.000000,180.770212)}
{pt3dadd(173976.000000,102780.000000,49200.000000,196.087764)}
{pt3dadd(174084.000000,102792.000000,49125.000000,212.171194)}
{pt3dadd(174192.000000,102816.000000,49025.000000,212.171194)}
{pt3dadd(174288.000000,102840.000000,48925.000000,213.944144)}
{pt3dadd(174420.000000,102828.000000,48800.000000,213.944144)}
{pt3dadd(174552.000000,102900.000000,48725.000000,209.937064)}
{pt3dadd(174660.000000,102912.000000,48625.000000,202.634887)}
{pt3dadd(174804.000000,102864.000000,48500.000000,195.467360)}

{create adhoc13}
{access adhoc13}
{connect adhoc13(1), adhoc5(0)}
{nseg = 1}
{strdef color color = "White"}
{pt3dclear()}
{pt3dadd(176484.000000,96324.000000,57600.000000,493.936280)}
{pt3dadd(176400.000000,96396.000000,57625.000000,519.044700)}
{pt3dadd(176340.000000,96444.000000,57625.000000,519.127028)}
{pt3dadd(176268.000000,96492.000000,57625.000000,514.422872)}
{pt3dadd(176208.000000,96564.000000,57600.000000,490.846066)}
{pt3dadd(176148.000000,96648.000000,57600.000000,481.202554)}
{pt3dadd(176088.000000,96720.000000,57600.000000,425.515850)}
{pt3dadd(176028.000000,96804.000000,57600.000000,352.061828)}
{pt3dadd(175968.000000,96888.000000,57600.000000,295.210608)}
{pt3dadd(175872.000000,96960.000000,57600.000000,247.106342)}
{pt3dadd(175764.000000,97020.000000,57600.000000,202.917516)}
{pt3dadd(175704.000000,97080.000000,57650.000000,198.910436)}
{pt3dadd(175632.000000,97128.000000,57675.000000,208.707086)}
{pt3dadd(175548.000000,97152.000000,57700.000000,208.707086)}
{pt3dadd(175440.000000,97236.000000,57700.000000,214.575758)}
{pt3dadd(175332.000000,97320.000000,57700.000000,212.199844)}
{pt3dadd(175224.000000,97416.000000,57700.000000,216.206924)}
{pt3dadd(175104.000000,97500.000000,57700.000000,228.710204)}
{pt3dadd(174984.000000,97548.000000,57700.000000,232.526468)}
{pt3dadd(174864.000000,97584.000000,57700.000000,234.681496)}
{pt3dadd(174744.000000,97632.000000,57700.000000,247.809936)}
{pt3dadd(174624.000000,97668.000000,57700.000000,257.098374)}
{pt3dadd(174552.000000,97692.000000,57675.000000,249.233788)}
{pt3dadd(174528.000000,97752.000000,57700.000000,268.832444)}
{pt3dadd(174552.000000,97884.000000,57700.000000,281.335724)}
{pt3dadd(174552.000000,97980.000000,57675.000000,278.447784)}
{pt3dadd(174636.000000,98064.000000,57650.000000,283.817654)}
{pt3dadd(174696.000000,98088.000000,57600.000000,288.794300)}
{pt3dadd(174780.000000,98136.000000,57550.000000,288.794300)}

{create adhoc14}
{access adhoc14}
{connect adhoc14(1), adhoc4(0)}
{nseg = 1}
{strdef color color = "White"}
{pt3dclear()}
{pt3dadd(177636.000000,96900.000000,60925.000000,1132.111000)}
{pt3dadd(177696.000000,96948.000000,60925.000000,902.226170)}
{pt3dadd(177792.000000,97056.000000,60925.000000,833.590742)}
{pt3dadd(177888.000000,97164.000000,60925.000000,760.419994)}
{pt3dadd(177960.000000,97320.000000,60925.000000,690.247520)}
{pt3dadd(178032.000000,97476.000000,60925.000000,591.812108)}
{pt3dadd(178116.000000,97620.000000,60925.000000,499.207456)}
{pt3dadd(178188.000000,97776.000000,60925.000000,420.850668)}
{pt3dadd(178296.000000,97848.000000,60925.000000,325.358076)}
{pt3dadd(178380.000000,97944.000000,60925.000000,290.249964)}
{pt3dadd(178428.000000,98052.000000,60925.000000,306.410748)}
{pt3dadd(178488.000000,98148.000000,60925.000000,303.522808)}
{pt3dadd(178560.000000,98244.000000,60925.000000,303.522808)}
{pt3dadd(178692.000000,98328.000000,60925.000000,300.772388)}
{pt3dadd(178776.000000,98316.000000,60925.000000,297.740044)}
{pt3dadd(178908.000000,98388.000000,60825.000000,286.449890)}
{pt3dadd(179016.000000,98400.000000,60750.000000,276.209390)}
{pt3dadd(179148.000000,98436.000000,60700.000000,265.456864)}
{pt3dadd(179292.000000,98520.000000,60600.000000,262.837414)}
{pt3dadd(179352.000000,98568.000000,60525.000000,265.869758)}
{pt3dadd(179400.000000,98616.000000,60450.000000,274.127568)}
{pt3dadd(179460.000000,98688.000000,60450.000000,290.288352)}
{pt3dadd(179532.000000,98760.000000,60450.000000,290.288352)}
{pt3dadd(179592.000000,98820.000000,60450.000000,290.288352)}
{pt3dadd(179652.000000,98892.000000,60400.000000,284.368068)}
{pt3dadd(179712.000000,98964.000000,60325.000000,287.400412)}
{pt3dadd(179796.000000,99000.000000,60300.000000,290.584372)}
{pt3dadd(179844.000000,99060.000000,60200.000000,295.698538)}
{pt3dadd(179880.000000,99144.000000,60200.000000,301.068408)}
{pt3dadd(179904.000000,99216.000000,60125.000000,293.203822)}
{pt3dadd(179892.000000,99312.000000,60125.000000,284.533118)}
{pt3dadd(179928.000000,99384.000000,60050.000000,278.316814)}
{pt3dadd(179976.000000,99480.000000,59975.000000,286.987518)}
{pt3dadd(180000.000000,99564.000000,59975.000000,302.945230)}
{pt3dadd(180024.000000,99660.000000,59925.000000,319.914060)}
{pt3dadd(180024.000000,99780.000000,59850.000000,340.431367)}
{pt3dadd(180048.000000,99900.000000,59825.000000,334.315520)}

{create adhoc15}
{access adhoc15}
{connect adhoc15(1), adhoc14(0)}
{nseg = 1}
{strdef color color = "White"}
{pt3dclear()}
{pt3dadd(180048.000000,99900.000000,59825.000000,334.315520)}
{pt3dadd(180072.000000,99984.000000,59725.000000,382.346893)}
{pt3dadd(180132.000000,100068.000000,59725.000000,350.643068)}
{pt3dadd(180192.000000,100152.000000,59725.000000,357.496536)}
{pt3dadd(180264.000000,100248.000000,59725.000000,339.903164)}
{pt3dadd(180384.000000,100356.000000,59725.000000,325.493752)}
{pt3dadd(180492.000000,100464.000000,59725.000000,321.983436)}
{pt3dadd(180612.000000,100572.000000,59725.000000,348.181648)}
{pt3dadd(180720.000000,100680.000000,59725.000000,348.181648)}
{pt3dadd(180816.000000,100788.000000,59650.000000,351.365608)}
{pt3dadd(180924.000000,100896.000000,59650.000000,345.149304)}
{pt3dadd(181056.000000,101004.000000,59650.000000,345.149304)}
{pt3dadd(181176.000000,101124.000000,59650.000000,321.327006)}
{pt3dadd(181296.000000,101256.000000,59650.000000,305.369294)}
{pt3dadd(181416.000000,101376.000000,59650.000000,352.864784)}
{pt3dadd(181428.000000,101496.000000,59750.000000,342.112258)}
{pt3dadd(181476.000000,101628.000000,59750.000000,326.914442)}
{pt3dadd(181476.000000,101772.000000,59750.000000,326.914442)}
{pt3dadd(181524.000000,101892.000000,59725.000000,332.834726)}
{pt3dadd(181572.000000,102000.000000,59725.000000,276.234992)}
{pt3dadd(181608.000000,102096.000000,59800.000000,267.388862)}
{pt3dadd(181632.000000,102156.000000,59825.000000,264.769412)}
{pt3dadd(181668.000000,102228.000000,59900.000000,260.130718)}
{pt3dadd(181680.000000,102300.000000,59975.000000,254.210434)}
{pt3dadd(181704.000000,102408.000000,59975.000000,241.707154)}
{pt3dadd(181740.000000,102504.000000,60000.000000,248.177370)}
{pt3dadd(181776.000000,102588.000000,60000.000000,250.796820)}
{pt3dadd(181812.000000,102696.000000,60025.000000,257.930230)}
{pt3dadd(181824.000000,102804.000000,60025.000000,260.818170)}
{pt3dadd(181812.000000,102924.000000,60025.000000,270.571030)}
{pt3dadd(181776.000000,103020.000000,60025.000000,293.258926)}
{pt3dadd(181728.000000,103140.000000,60025.000000,288.144760)}
{pt3dadd(181680.000000,103236.000000,60050.000000,293.514630)}
{pt3dadd(181680.000000,103356.000000,60050.000000,290.626690)}
{pt3dadd(181680.000000,103476.000000,60050.000000,313.020650)}
{pt3dadd(181680.000000,103596.000000,60050.000000,320.216794)}
{pt3dadd(181680.000000,103740.000000,60100.000000,325.330960)}
{pt3dadd(181668.000000,103872.000000,60100.000000,337.778356)}
{pt3dadd(181644.000000,103992.000000,60025.000000,350.225752)}
{pt3dadd(181632.000000,104112.000000,60025.000000,339.686456)}
{pt3dadd(181644.000000,104244.000000,59975.000000,329.147160)}
{pt3dadd(181680.000000,104328.000000,59875.000000,347.855292)}
{pt3dadd(181692.000000,104460.000000,59775.000000,341.328180)}
{pt3dadd(181704.000000,104568.000000,59725.000000,337.985028)}
{pt3dadd(181740.000000,104628.000000,59725.000000,331.768724)}
{pt3dadd(181740.000000,104700.000000,59725.000000,325.552420)}
{pt3dadd(181764.000000,104784.000000,59725.000000,304.224838)}
{pt3dadd(181776.000000,104856.000000,59725.000000,295.554134)}
{pt3dadd(181848.000000,104940.000000,59625.000000,289.337830)}
{pt3dadd(181872.000000,105024.000000,59525.000000,286.449890)}
{pt3dadd(181908.000000,105096.000000,59475.000000,273.321450)}
{pt3dadd(181920.000000,105180.000000,59400.000000,270.826734)}
{pt3dadd(181932.000000,105288.000000,59300.000000,256.866438)}
{pt3dadd(181932.000000,105408.000000,59250.000000,235.313110)}
{pt3dadd(181968.000000,105528.000000,59250.000000,216.647722)}
{pt3dadd(181992.000000,105600.000000,59250.000000,201.291658)}
{pt3dadd(181992.000000,105696.000000,59250.000000,192.445528)}
{pt3dadd(182040.000000,105792.000000,59150.000000,183.559680)}
{pt3dadd(182052.000000,105864.000000,59125.000000,178.236618)}
{pt3dadd(182052.000000,105960.000000,59125.000000,176.375026)}
{pt3dadd(182040.000000,106044.000000,59125.000000,187.313282)}
{pt3dadd(182028.000000,106128.000000,59125.000000,187.313282)}
{pt3dadd(181992.000000,106212.000000,59050.000000,190.609916)}
{pt3dadd(181992.000000,106320.000000,59050.000000,195.932978)}
{pt3dadd(182016.000000,106440.000000,59050.000000,203.956678)}
{pt3dadd(182064.000000,106524.000000,59050.000000,208.374486)}
{pt3dadd(182088.000000,106584.000000,58950.000000,210.426894)}
{pt3dadd(182112.000000,106680.000000,58900.000000,220.223544)}
{pt3dadd(182124.000000,106776.000000,58900.000000,236.138512)}
{pt3dadd(182160.000000,106836.000000,58900.000000,238.401292)}
{pt3dadd(182172.000000,106932.000000,58800.000000,240.777206)}
{pt3dadd(182208.000000,107028.000000,58775.000000,240.777206)}
{pt3dadd(182244.000000,107100.000000,58775.000000,236.569770)}
{pt3dadd(182280.000000,107220.000000,58725.000000,229.079690)}
{pt3dadd(182292.000000,107340.000000,58700.000000,229.079690)}
{pt3dadd(182328.000000,107472.000000,58700.000000,226.703776)}
{pt3dadd(182328.000000,107568.000000,58650.000000,224.651368)}
{pt3dadd(182400.000000,107712.000000,58650.000000,231.121584)}
{pt3dadd(182436.000000,107844.000000,58650.000000,235.992214)}
{pt3dadd(182496.000000,107976.000000,58650.000000,243.482294)}
{pt3dadd(182580.000000,108108.000000,58650.000000,248.352924)}
{pt3dadd(182652.000000,108240.000000,58650.000000,254.823140)}
{pt3dadd(182712.000000,108324.000000,58700.000000,262.313220)}
{pt3dadd(182760.000000,108384.000000,58700.000000,253.024782)}
{pt3dadd(182796.000000,108492.000000,58700.000000,237.109814)}
{pt3dadd(182832.000000,108588.000000,58700.000000,229.976404)}
{pt3dadd(182868.000000,108696.000000,58650.000000,225.558596)}
{pt3dadd(182892.000000,108792.000000,58600.000000,209.643628)}
{pt3dadd(182964.000000,108936.000000,58550.000000,214.061436)}
{pt3dadd(183036.000000,109056.000000,58550.000000,245.174220)}
{pt3dadd(183096.000000,109188.000000,58500.000000,270.124896)}
{pt3dadd(183168.000000,109320.000000,58400.000000,276.918618)}
{pt3dadd(183192.000000,109428.000000,58400.000000,298.471946)}
{pt3dadd(183240.000000,109548.000000,58400.000000,296.209166)}
{pt3dadd(183300.000000,109668.000000,58400.000000,283.761770)}
{pt3dadd(183360.000000,109788.000000,58400.000000,271.314374)}
{pt3dadd(183432.000000,109908.000000,58350.000000,268.938460)}
{pt3dadd(183504.000000,109992.000000,58275.000000,255.810020)}
{pt3dadd(183576.000000,110076.000000,58275.000000,265.562880)}
{pt3dadd(183648.000000,110196.000000,58275.000000,257.698294)}
{pt3dadd(183732.000000,110316.000000,58275.000000,245.195014)}
{pt3dadd(183804.000000,110352.000000,58200.000000,242.932234)}
{pt3dadd(183888.000000,110436.000000,58200.000000,232.645754)}
{pt3dadd(183936.000000,110520.000000,58200.000000,230.026304)}
{pt3dadd(183984.000000,110664.000000,58200.000000,235.140470)}
{pt3dadd(184020.000000,110808.000000,58200.000000,232.985442)}
{pt3dadd(184044.000000,110928.000000,58150.000000,230.830414)}
{pt3dadd(184068.000000,111060.000000,58150.000000,236.699086)}
{pt3dadd(184092.000000,111192.000000,58150.000000,244.956896)}
{pt3dadd(184116.000000,111312.000000,58150.000000,237.466816)}
{pt3dadd(184140.000000,111420.000000,58150.000000,258.045408)}
{pt3dadd(184164.000000,111528.000000,58150.000000,267.333846)}
{pt3dadd(184224.000000,111648.000000,58150.000000,291.096398)}
{pt3dadd(184272.000000,111756.000000,58150.000000,300.655854)}
{pt3dadd(184332.000000,111876.000000,58150.000000,298.393074)}
{pt3dadd(184356.000000,111984.000000,58150.000000,279.969510)}
{pt3dadd(184368.000000,112104.000000,58175.000000,263.039450)}
{pt3dadd(184380.000000,112212.000000,58225.000000,241.431926)}
{pt3dadd(184392.000000,112332.000000,58225.000000,216.481250)}
{pt3dadd(184392.000000,112428.000000,58250.000000,210.319142)}
{pt3dadd(184392.000000,112536.000000,58250.000000,204.157034)}
{pt3dadd(184416.000000,112668.000000,58325.000000,209.746248)}
{pt3dadd(184452.000000,112764.000000,58350.000000,212.009028)}
{pt3dadd(184500.000000,112884.000000,58350.000000,214.271808)}
{pt3dadd(184548.000000,112992.000000,58350.000000,227.567326)}
{pt3dadd(184584.000000,113112.000000,58350.000000,240.862844)}
{pt3dadd(184620.000000,113232.000000,58350.000000,263.493844)}
{pt3dadd(184668.000000,113364.000000,58350.000000,276.622284)}
{pt3dadd(184716.000000,113496.000000,58350.000000,284.112364)}
{pt3dadd(184764.000000,113616.000000,58350.000000,281.617648)}
{pt3dadd(184812.000000,113748.000000,58350.000000,272.329210)}
{pt3dadd(184860.000000,113868.000000,58350.000000,242.420476)}
{pt3dadd(184884.000000,114036.000000,58275.000000,220.867148)}
{pt3dadd(184920.000000,114192.000000,58275.000000,218.247698)}
{pt3dadd(184944.000000,114360.000000,58275.000000,215.871784)}
{pt3dadd(184944.000000,114480.000000,58250.000000,218.026812)}
{pt3dadd(184884.000000,114600.000000,58250.000000,227.356954)}
{pt3dadd(184836.000000,114720.000000,58250.000000,229.311626)}
{pt3dadd(184776.000000,114840.000000,58250.000000,222.178216)}
{pt3dadd(184740.000000,114960.000000,58250.000000,238.339000)}
{pt3dadd(184704.000000,115104.000000,58200.000000,228.542350)}
{pt3dadd(184680.000000,115248.000000,58200.000000,226.489942)}
{pt3dadd(184680.000000,115380.000000,58125.000000,214.613948)}
{pt3dadd(184656.000000,115500.000000,58125.000000,203.128778)}
{pt3dadd(184644.000000,115608.000000,58175.000000,180.497778)}
{pt3dadd(184620.000000,115716.000000,58075.000000,184.132320)}
{pt3dadd(184608.000000,115824.000000,58075.000000,180.316056)}
{pt3dadd(184596.000000,115944.000000,58075.000000,211.790706)}
{pt3dadd(184584.000000,116028.000000,58075.000000,230.409286)}
{pt3dadd(184608.000000,116100.000000,58050.000000,228.454614)}
{pt3dadd(184596.000000,116196.000000,58025.000000,221.523438)}
{pt3dadd(184548.000000,116244.000000,57975.000000,219.750488)}
{pt3dadd(184500.000000,116328.000000,57975.000000,189.734448)}
{pt3dadd(184476.000000,116424.000000,57975.000000,171.115868)}
{pt3dadd(184464.000000,116520.000000,57975.000000,171.115868)}
{pt3dadd(184452.000000,116616.000000,57925.000000,188.847846)}
{pt3dadd(184440.000000,116724.000000,57925.000000,203.283190)}
{pt3dadd(184380.000000,116820.000000,57925.000000,206.422840)}
{pt3dadd(184320.000000,116892.000000,57925.000000,208.111360)}
{pt3dadd(184248.000000,116988.000000,58025.000000,202.788298)}
{pt3dadd(184236.000000,117084.000000,58125.000000,188.352954)}
{pt3dadd(184248.000000,117192.000000,58125.000000,177.552152)}
{pt3dadd(184224.000000,117300.000000,58150.000000,182.875214)}
{pt3dadd(184224.000000,117420.000000,58225.000000,192.671864)}
{pt3dadd(184236.000000,117552.000000,58250.000000,202.002006)}
{pt3dadd(184236.000000,117684.000000,58250.000000,203.774956)}
{pt3dadd(184236.000000,117732.000000,58375.000000,201.913364)}
{pt3dadd(184248.000000,117828.000000,58425.000000,205.920444)}
{pt3dadd(184260.000000,117912.000000,58425.000000,203.765416)}
{pt3dadd(184296.000000,118008.000000,58425.000000,199.758336)}
{pt3dadd(184332.000000,118116.000000,58475.000000,194.688752)}
{pt3dadd(184356.000000,118236.000000,58475.000000,198.505016)}
{pt3dadd(184392.000000,118332.000000,58525.000000,198.505016)}
{pt3dadd(184452.000000,118440.000000,58525.000000,180.604464)}
{pt3dadd(184500.000000,118536.000000,58475.000000,175.281402)}
{pt3dadd(184548.000000,118632.000000,58475.000000,178.578036)}
{pt3dadd(184596.000000,118728.000000,58475.000000,174.761772)}
{pt3dadd(184644.000000,118812.000000,58425.000000,167.120150)}
{pt3dadd(184656.000000,118884.000000,58425.000000,172.550910)}
{pt3dadd(184716.000000,118968.000000,58375.000000,174.239430)}
{pt3dadd(184776.000000,118992.000000,58275.000000,179.828644)}
{pt3dadd(184812.000000,119052.000000,58200.000000,185.697316)}
{pt3dadd(184812.000000,119172.000000,58075.000000,193.338938)}
{pt3dadd(184800.000000,119232.000000,57950.000000,212.602452)}
{pt3dadd(184788.000000,119352.000000,57825.000000,222.399102)}
{pt3dadd(184800.000000,119472.000000,57775.000000,224.451510)}
{pt3dadd(184788.000000,119580.000000,57750.000000,224.451510)}
{pt3dadd(184776.000000,119688.000000,57750.000000,213.513254)}
{pt3dadd(184752.000000,119748.000000,57725.000000,184.351083)}
{pt3dadd(184728.000000,119832.000000,57750.000000,178.188975)}
{pt3dadd(184704.000000,119892.000000,57825.000000,156.857131)}
{pt3dadd(184668.000000,119964.000000,57875.000000,159.012159)}
{pt3dadd(184644.000000,120036.000000,57875.000000,179.238853)}
{pt3dadd(184632.000000,120144.000000,57875.000000,206.025110)}
{pt3dadd(184632.000000,120264.000000,57875.000000,224.690498)}
{pt3dadd(184632.000000,120372.000000,57875.000000,260.680650)}
{pt3dadd(184608.000000,120468.000000,57875.000000,270.433510)}
{pt3dadd(184596.000000,120600.000000,57925.000000,291.761092)}
{pt3dadd(184584.000000,120732.000000,58000.000000,296.631722)}
{pt3dadd(184572.000000,120864.000000,58000.000000,312.589434)}
{pt3dadd(184560.000000,120996.000000,58000.000000,328.547146)}
{pt3dadd(184560.000000,121068.000000,58025.000000,354.811222)}
{pt3dadd(184596.000000,121176.000000,58025.000000,351.300906)}
{pt3dadd(184608.000000,121260.000000,58025.000000,380.184432)}
{pt3dadd(184620.000000,121356.000000,58025.000000,391.804006)}
{pt3dadd(184668.000000,121464.000000,58150.000000,438.163954)}
{pt3dadd(184680.000000,121584.000000,58325.000000,427.097694)}
{pt3dadd(184692.000000,121668.000000,58425.000000,460.618050)}
{pt3dadd(184740.000000,121740.000000,58550.000000,468.948488)}
{pt3dadd(184704.000000,121848.000000,58675.000000,492.525294)}
{pt3dadd(184632.000000,121944.000000,58700.000000,481.361726)}
{pt3dadd(184548.000000,122016.000000,58775.000000,505.238570)}
{pt3dadd(184440.000000,122028.000000,58825.000000,478.914358)}
{pt3dadd(184296.000000,121992.000000,58875.000000,478.914358)}
{pt3dadd(184164.000000,121968.000000,58875.000000,473.728018)}
{pt3dadd(184176.000000,122124.000000,58975.000000,438.531638)}
{pt3dadd(184200.000000,122196.000000,58975.000000,425.721054)}
{pt3dadd(184260.000000,122268.000000,58975.000000,418.524910)}
{pt3dadd(184308.000000,122388.000000,58975.000000,386.680816)}
{pt3dadd(184320.000000,122544.000000,59000.000000,324.002348)}
{pt3dadd(184308.000000,122700.000000,59025.000000,293.386328)}
{pt3dadd(184380.000000,122808.000000,59025.000000,259.632172)}
{pt3dadd(184464.000000,122868.000000,59050.000000,232.526468)}
{pt3dadd(184512.000000,122892.000000,59075.000000,215.815752)}
{pt3dadd(184560.000000,122904.000000,59125.000000,215.815752)}
{pt3dadd(184620.000000,122940.000000,59125.000000,213.763344)}
{pt3dadd(184680.000000,122964.000000,59125.000000,213.763344)}
{pt3dadd(184728.000000,122988.000000,59125.000000,218.181152)}
{pt3dadd(184836.000000,123012.000000,59125.000000,222.388588)}
{pt3dadd(184944.000000,123036.000000,59125.000000,226.596024)}
{pt3dadd(185052.000000,123060.000000,59125.000000,216.178640)}
{pt3dadd(185160.000000,123084.000000,59125.000000,192.660280)}
{pt3dadd(185244.000000,123108.000000,59175.000000,169.141920)}
{pt3dadd(185316.000000,123120.000000,59150.000000,149.086340)}
{pt3dadd(185388.000000,123132.000000,59150.000000,124.562863)}
{pt3dadd(185460.000000,123144.000000,59150.000000,113.676963)}
{pt3dadd(185532.000000,123120.000000,59150.000000,111.445671)}
{pt3dadd(185616.000000,123120.000000,59150.000000,122.904601)}
{pt3dadd(185736.000000,123144.000000,59150.000000,128.335361)}
{pt3dadd(185844.000000,123168.000000,59150.000000,136.775408)}
{pt3dadd(185892.000000,123228.000000,59175.000000,149.192844)}
{pt3dadd(185952.000000,123288.000000,59150.000000,159.586432)}
{pt3dadd(186000.000000,123348.000000,59150.000000,159.586432)}
{pt3dadd(186024.000000,123420.000000,59150.000000,162.726082)}
{pt3dadd(186096.000000,123456.000000,59200.000000,169.012862)}
{pt3dadd(186168.000000,123492.000000,59200.000000,172.309496)}
{pt3dadd(186288.000000,123528.000000,59250.000000,173.917610)}
{pt3dadd(186408.000000,123552.000000,59300.000000,169.089440)}
{pt3dadd(186468.000000,123552.000000,59300.000000,170.777960)}
{pt3dadd(186528.000000,123564.000000,59325.000000,167.481326)}
{pt3dadd(186576.000000,123600.000000,59325.000000,175.122948)}
{pt3dadd(186624.000000,123636.000000,59325.000000,182.400682)}
{pt3dadd(186696.000000,123672.000000,59325.000000,185.540332)}
{pt3dadd(186768.000000,123708.000000,59325.000000,189.174874)}
{pt3dadd(186828.000000,123720.000000,59350.000000,190.782988)}
{pt3dadd(186936.000000,123744.000000,59350.000000,186.775908)}
{pt3dadd(187032.000000,123768.000000,59350.000000,181.186694)}
{pt3dadd(187140.000000,123792.000000,59350.000000,186.509756)}
{pt3dadd(187248.000000,123804.000000,59350.000000,192.671864)}
{pt3dadd(187356.000000,123816.000000,59350.000000,197.994926)}
{pt3dadd(187440.000000,123792.000000,59250.000000,205.737540)}
{pt3dadd(187512.000000,123780.000000,59200.000000,195.467360)}

{create adhoc16}
{access adhoc16}
{connect adhoc16(1), adhoc14(0)}
{nseg = 1}
{strdef color color = "White"}
{pt3dclear()}
{pt3dadd(180048.000000,99900.000000,59825.000000,334.315520)}
{pt3dadd(180000.000000,99936.000000,59725.000000,357.452933)}
{pt3dadd(179928.000000,99984.000000,59725.000000,316.998560)}
{pt3dadd(179844.000000,100020.000000,59625.000000,305.143896)}
{pt3dadd(179736.000000,100032.000000,59550.000000,275.259856)}
{pt3dadd(179628.000000,100044.000000,59400.000000,250.309180)}
{pt3dadd(179520.000000,100056.000000,59275.000000,245.891372)}
{pt3dadd(179424.000000,100092.000000,59225.000000,229.976404)}
{pt3dadd(179328.000000,100116.000000,59175.000000,218.068516)}
{pt3dadd(179232.000000,100152.000000,59125.000000,207.782036)}
{pt3dadd(179160.000000,100212.000000,59100.000000,196.296866)}
{pt3dadd(179100.000000,100284.000000,59025.000000,188.655244)}
{pt3dadd(179004.000000,100332.000000,58950.000000,186.793652)}
{pt3dadd(178896.000000,100392.000000,58950.000000,177.463510)}
{pt3dadd(178800.000000,100392.000000,58850.000000,183.332182)}
{pt3dadd(178692.000000,100440.000000,58800.000000,188.655244)}
{pt3dadd(178584.000000,100476.000000,58750.000000,190.428194)}
{pt3dadd(178512.000000,100560.000000,58700.000000,190.428194)}
{pt3dadd(178452.000000,100644.000000,58700.000000,193.889664)}
{pt3dadd(178380.000000,100740.000000,58700.000000,186.248042)}
{pt3dadd(178308.000000,100824.000000,58700.000000,188.202714)}
{pt3dadd(178272.000000,100956.000000,58700.000000,190.064306)}
{pt3dadd(178236.000000,101076.000000,58700.000000,190.064306)}
{pt3dadd(178212.000000,101160.000000,58600.000000,188.291356)}
{pt3dadd(178188.000000,101268.000000,58575.000000,190.064306)}
{pt3dadd(178152.000000,101316.000000,58500.000000,188.109634)}
{pt3dadd(178116.000000,101412.000000,58500.000000,184.475092)}
{pt3dadd(178116.000000,101520.000000,58450.000000,184.475092)}
{pt3dadd(178140.000000,101628.000000,58400.000000,186.248042)}
{pt3dadd(178152.000000,101736.000000,58300.000000,186.248042)}
{pt3dadd(178164.000000,101808.000000,57975.000000,186.248042)}
{pt3dadd(178176.000000,102156.000000,57825.000000,198.307472)}
{pt3dadd(178176.000000,102384.000000,57675.000000,206.406187)}
{pt3dadd(178248.000000,102636.000000,57650.000000,237.591800)}

{create adhoc17}
{access adhoc17}
{connect adhoc17(1), adhoc1(0)}
{nseg = 1}
{strdef color color = "White"}
{pt3dclear()}
{pt3dadd(172344.000000,99444.000000,76475.000000,630.401730)}
{pt3dadd(172320.000000,99408.000000,76675.000000,674.030797)}
{pt3dadd(172308.000000,99372.000000,76800.000000,662.883184)}
{pt3dadd(172308.000000,99336.000000,76950.000000,651.161432)}
{pt3dadd(172236.000000,99264.000000,77075.000000,651.161432)}
{pt3dadd(172188.000000,99192.000000,77150.000000,619.566254)}
{pt3dadd(172116.000000,99180.000000,77275.000000,596.094846)}
{pt3dadd(172044.000000,99168.000000,77400.000000,578.927452)}
{pt3dadd(171972.000000,99156.000000,77500.000000,584.645378)}
{pt3dadd(171948.000000,99156.000000,77650.000000,563.170707)}
{pt3dadd(171924.000000,99096.000000,77825.000000,600.382600)}

{create adhoc18}
{access adhoc18}
{connect adhoc18(1), adhoc17(0)}
{nseg = 1}
{strdef color color = "White"}
{pt3dclear()}
{pt3dadd(171924.000000,99096.000000,77825.000000,600.382600)}
{pt3dadd(171900.000000,99036.000000,77975.000000,631.927713)}
{pt3dadd(171876.000000,99012.000000,78150.000000,657.494760)}
{pt3dadd(171876.000000,99012.000000,78300.000000,676.421828)}
{pt3dadd(171852.000000,99000.000000,78425.000000,702.299080)}
{pt3dadd(171864.000000,98964.000000,78575.000000,702.299080)}
{pt3dadd(171720.000000,98904.000000,78675.000000,708.918308)}
{pt3dadd(171672.000000,98856.000000,78800.000000,695.348896)}
{pt3dadd(171612.000000,98820.000000,78950.000000,702.299080)}
{pt3dadd(171576.000000,98796.000000,79075.000000,688.729668)}
{pt3dadd(171528.000000,98796.000000,79250.000000,675.806426)}
{pt3dadd(171540.000000,98796.000000,79425.000000,656.879358)}
{pt3dadd(171480.000000,98772.000000,79625.000000,663.498586)}
{pt3dadd(171444.000000,98760.000000,79775.000000,637.621334)}
{pt3dadd(171456.000000,98748.000000,79900.000000,637.621334)}
{pt3dadd(171444.000000,98748.000000,80075.000000,643.925348)}
{pt3dadd(171372.000000,98748.000000,80200.000000,643.925348)}
{pt3dadd(171348.000000,98760.000000,80350.000000,613.834712)}
{pt3dadd(171324.000000,98784.000000,80500.000000,602.671144)}
{pt3dadd(171324.000000,98760.000000,80650.000000,584.645378)}
{pt3dadd(171348.000000,98784.000000,80850.000000,566.619612)}
{pt3dadd(171360.000000,98796.000000,81000.000000,560.901686)}
{pt3dadd(171384.000000,98844.000000,81175.000000,560.901686)}
{pt3dadd(171360.000000,98868.000000,81300.000000,572.065254)}
{pt3dadd(171336.000000,98892.000000,81450.000000,566.619612)}
{pt3dadd(171324.000000,98892.000000,81575.000000,566.619612)}
{pt3dadd(171360.000000,98868.000000,81725.000000,566.619612)}
{pt3dadd(171360.000000,98796.000000,81850.000000,577.783180)}
{pt3dadd(171324.000000,98820.000000,82025.000000,572.065254)}
{pt3dadd(171252.000000,98832.000000,82125.000000,577.510896)}
{pt3dadd(171168.000000,98808.000000,82225.000000,577.510896)}
{pt3dadd(171144.000000,98760.000000,82350.000000,583.228822)}
{pt3dadd(171180.000000,98724.000000,82525.000000,577.510896)}
{pt3dadd(171156.000000,98688.000000,82675.000000,566.878914)}
{pt3dadd(171156.000000,98712.000000,82850.000000,551.307576)}
{pt3dadd(171156.000000,98688.000000,83025.000000,551.307576)}
{pt3dadd(171168.000000,98640.000000,83175.000000,557.311402)}
{pt3dadd(171180.000000,98616.000000,83325.000000,557.311402)}
{pt3dadd(171192.000000,98568.000000,83500.000000,579.665136)}
{pt3dadd(171216.000000,98556.000000,83650.000000,606.958226)}
{pt3dadd(171228.000000,98532.000000,83775.000000,624.983992)}
{pt3dadd(171264.000000,98496.000000,83925.000000,644.857418)}
{pt3dadd(171312.000000,98496.000000,84050.000000,683.750276)}
{pt3dadd(171372.000000,98508.000000,84175.000000,726.629660)}
{pt3dadd(171408.000000,98484.000000,84300.000000,746.503086)}
{pt3dadd(171396.000000,98460.000000,84450.000000,780.274923)}
{pt3dadd(171420.000000,98388.000000,84600.000000,729.768860)}

{create adhoc19}
{access adhoc19}
{connect adhoc19(1), adhoc18(0)}
{nseg = 1}
{strdef color color = "White"}
{pt3dclear()}
{pt3dadd(171420.000000,98388.000000,84600.000000,729.768860)}
{pt3dadd(171276.000000,98352.000000,84525.000000,695.569533)}
{pt3dadd(171132.000000,98304.000000,84525.000000,709.596760)}
{pt3dadd(171000.000000,98244.000000,84525.000000,724.557008)}
{pt3dadd(170856.000000,98196.000000,84525.000000,731.507192)}
{pt3dadd(170724.000000,98136.000000,84525.000000,644.378412)}
{pt3dadd(170580.000000,98088.000000,84525.000000,548.475376)}
{pt3dadd(170388.000000,98028.000000,84425.000000,440.479504)}
{pt3dadd(170232.000000,98004.000000,84425.000000,320.613628)}
{pt3dadd(170088.000000,97968.000000,84425.000000,222.178216)}
{pt3dadd(169944.000000,97932.000000,84425.000000,220.023188)}
{pt3dadd(169812.000000,97908.000000,84425.000000,217.970780)}
{pt3dadd(169668.000000,97860.000000,84425.000000,213.763344)}
{pt3dadd(169536.000000,97812.000000,84425.000000,211.808672)}
{pt3dadd(169404.000000,97788.000000,84350.000000,199.749242)}
{pt3dadd(169272.000000,97740.000000,84350.000000,195.742162)}
{pt3dadd(169152.000000,97680.000000,84350.000000,188.464428)}
{pt3dadd(169032.000000,97632.000000,84350.000000,184.648164)}
{pt3dadd(168900.000000,97596.000000,84350.000000,186.602836)}
{pt3dadd(168768.000000,97524.000000,84350.000000,194.244458)}
{pt3dadd(168660.000000,97476.000000,84375.000000,196.199130)}
{pt3dadd(168564.000000,97452.000000,84450.000000,207.684300)}
{pt3dadd(168468.000000,97452.000000,84525.000000,213.552972)}
{pt3dadd(168396.000000,97428.000000,84600.000000,211.598300)}
{pt3dadd(168312.000000,97368.000000,84650.000000,213.753328)}
{pt3dadd(168252.000000,97308.000000,84725.000000,217.960764)}
{pt3dadd(168216.000000,97248.000000,84800.000000,217.960764)}
{pt3dadd(168132.000000,97188.000000,84900.000000,229.868652)}
{pt3dadd(168036.000000,97164.000000,84925.000000,245.783620)}
{pt3dadd(167940.000000,97128.000000,84975.000000,252.917030)}
{pt3dadd(167856.000000,97116.000000,85050.000000,268.308250)}
{pt3dadd(167796.000000,97068.000000,85100.000000,275.441660)}
{pt3dadd(167724.000000,97020.000000,85200.000000,265.688800)}
{pt3dadd(167748.000000,96948.000000,85275.000000,255.935940)}
{pt3dadd(167760.000000,96888.000000,85375.000000,251.065310)}
{pt3dadd(167796.000000,96828.000000,85425.000000,240.312784)}
{pt3dadd(167700.000000,96840.000000,85550.000000,242.932234)}
{pt3dadd(167640.000000,96828.000000,85675.000000,252.685094)}
{pt3dadd(167604.000000,96816.000000,85775.000000,265.188374)}
{pt3dadd(167520.000000,96756.000000,85875.000000,275.428874)}
{pt3dadd(167424.000000,96720.000000,85925.000000,289.213744)}
{pt3dadd(167328.000000,96672.000000,86000.000000,294.852104)}
{pt3dadd(167232.000000,96636.000000,86125.000000,303.522808)}
{pt3dadd(167196.000000,96564.000000,86175.000000,309.443092)}
{pt3dadd(167148.000000,96516.000000,86325.000000,315.363376)}
{pt3dadd(167076.000000,96456.000000,86375.000000,315.363376)}
{pt3dadd(166980.000000,96432.000000,86525.000000,315.363376)}
{pt3dadd(166872.000000,96432.000000,86550.000000,306.692672)}
{pt3dadd(166812.000000,96384.000000,86625.000000,300.772388)}
{pt3dadd(166728.000000,96348.000000,86700.000000,294.852104)}
{pt3dadd(166620.000000,96348.000000,86775.000000,286.181400)}
{pt3dadd(166596.000000,96324.000000,86850.000000,283.293460)}
{pt3dadd(166536.000000,96300.000000,86925.000000,288.931820)}
{pt3dadd(166500.000000,96264.000000,87050.000000,278.691320)}
{pt3dadd(166464.000000,96192.000000,87125.000000,264.033012)}
{pt3dadd(166380.000000,96192.000000,87200.000000,252.125124)}
{pt3dadd(166296.000000,96192.000000,87325.000000,241.884624)}
{pt3dadd(166200.000000,96168.000000,87425.000000,224.338376)}
{pt3dadd(166128.000000,96144.000000,87525.000000,215.913488)}
{pt3dadd(166044.000000,96120.000000,87575.000000,211.906408)}
{pt3dadd(165984.000000,96084.000000,87700.000000,211.906408)}
{pt3dadd(165936.000000,96024.000000,87850.000000,209.643628)}
{pt3dadd(165912.000000,95964.000000,87950.000000,207.591220)}
{pt3dadd(165852.000000,96000.000000,88050.000000,213.753328)}
{pt3dadd(165792.000000,95940.000000,88125.000000,222.178216)}
{pt3dadd(165744.000000,95940.000000,88225.000000,220.125808)}
{pt3dadd(165720.000000,95916.000000,88350.000000,217.970780)}
{pt3dadd(165648.000000,95904.000000,88450.000000,222.178216)}
{pt3dadd(165612.000000,95940.000000,88575.000000,222.178216)}
{pt3dadd(165588.000000,95952.000000,88700.000000,219.915436)}
{pt3dadd(165540.000000,95952.000000,88850.000000,226.385652)}
{pt3dadd(165432.000000,95976.000000,88975.000000,228.540680)}
{pt3dadd(165360.000000,95952.000000,89125.000000,235.674090)}
{pt3dadd(165288.000000,95952.000000,89275.000000,237.936870)}
{pt3dadd(165276.000000,95976.000000,89400.000000,235.781842)}
{pt3dadd(165252.000000,95976.000000,89525.000000,243.271922)}
{pt3dadd(165168.000000,96060.000000,89700.000000,243.271922)}
{pt3dadd(165144.000000,96072.000000,89825.000000,238.401292)}
{pt3dadd(165096.000000,96108.000000,89925.000000,236.138512)}
{pt3dadd(164988.000000,96120.000000,90050.000000,238.293540)}
{pt3dadd(164940.000000,96120.000000,90200.000000,228.540680)}
{pt3dadd(164856.000000,96132.000000,90300.000000,224.333244)}
{pt3dadd(164748.000000,96156.000000,90350.000000,219.915436)}
{pt3dadd(164628.000000,96168.000000,90350.000000,217.760408)}
{pt3dadd(164544.000000,96180.000000,90425.000000,217.760408)}
{pt3dadd(164496.000000,96252.000000,90475.000000,213.552972)}
{pt3dadd(164412.000000,96324.000000,90550.000000,217.760408)}
{pt3dadd(164400.000000,96408.000000,90650.000000,219.915436)}
{pt3dadd(164316.000000,96432.000000,90750.000000,224.333244)}
{pt3dadd(164220.000000,96456.000000,90800.000000,226.596024)}
{pt3dadd(164136.000000,96480.000000,90875.000000,228.648432)}
{pt3dadd(164040.000000,96504.000000,91000.000000,220.624732)}
{pt3dadd(163956.000000,96528.000000,91050.000000,214.462624)}
{pt3dadd(163860.000000,96516.000000,91150.000000,207.992408)}
{pt3dadd(163788.000000,96504.000000,91250.000000,199.567520)}
{pt3dadd(163728.000000,96492.000000,91300.000000,199.567520)}
{pt3dadd(163680.000000,96528.000000,91425.000000,205.436192)}
{pt3dadd(163632.000000,96552.000000,91550.000000,211.598300)}
{pt3dadd(163596.000000,96576.000000,91675.000000,215.805736)}
{pt3dadd(163536.000000,96576.000000,91725.000000,213.944144)}
{pt3dadd(163476.000000,96600.000000,91800.000000,209.937064)}
{pt3dadd(163428.000000,96672.000000,91900.000000,204.068392)}
{pt3dadd(163344.000000,96720.000000,92000.000000,199.860956)}
{pt3dadd(163260.000000,96744.000000,92100.000000,197.705928)}
{pt3dadd(163212.000000,96768.000000,92200.000000,199.567520)}
{pt3dadd(163152.000000,96828.000000,92300.000000,203.574600)}
{pt3dadd(163068.000000,96924.000000,92375.000000,211.598300)}
{pt3dadd(163020.000000,97020.000000,92500.000000,215.805736)}
{pt3dadd(162972.000000,97044.000000,92600.000000,217.960764)}
{pt3dadd(162924.000000,97068.000000,92725.000000,226.385652)}
{pt3dadd(162864.000000,97080.000000,92850.000000,226.385652)}
{pt3dadd(162852.000000,97080.000000,92950.000000,238.888932)}
{pt3dadd(162768.000000,97092.000000,93050.000000,257.312496)}
{pt3dadd(162684.000000,97080.000000,93175.000000,269.815776)}
{pt3dadd(162612.000000,97068.000000,93300.000000,289.160520)}
{pt3dadd(162504.000000,97068.000000,93375.000000,303.818828)}
{pt3dadd(162408.000000,97068.000000,93500.000000,298.448958)}
{pt3dadd(162324.000000,97116.000000,93650.000000,292.528674)}
{pt3dadd(162216.000000,97164.000000,93775.000000,287.158804)}
{pt3dadd(162132.000000,97200.000000,93875.000000,263.396252)}
{pt3dadd(161976.000000,97224.000000,93925.000000,250.892972)}
{pt3dadd(161916.000000,97248.000000,94025.000000,243.759562)}
{pt3dadd(161844.000000,97284.000000,94100.000000,233.519062)}
{pt3dadd(161796.000000,97296.000000,94225.000000,218.361952)}
{pt3dadd(161712.000000,97308.000000,94300.000000,210.720330)}
{pt3dadd(161604.000000,97320.000000,94300.000000,204.558222)}
{pt3dadd(161532.000000,97332.000000,94375.000000,200.350786)}
{pt3dadd(161448.000000,97332.000000,94450.000000,198.088006)}
{pt3dadd(161340.000000,97344.000000,94450.000000,206.111706)}
{pt3dadd(161232.000000,97344.000000,94450.000000,220.547050)}
{pt3dadd(161148.000000,97356.000000,94500.000000,233.842568)}
{pt3dadd(161076.000000,97380.000000,94600.000000,240.312784)}
{pt3dadd(161004.000000,97392.000000,94700.000000,242.575564)}
{pt3dadd(160908.000000,97404.000000,94725.000000,242.575564)}
{pt3dadd(160824.000000,97416.000000,94775.000000,235.781842)}
{pt3dadd(160728.000000,97416.000000,94850.000000,235.781842)}
{pt3dadd(160644.000000,97404.000000,94975.000000,246.022342)}
{pt3dadd(160596.000000,97404.000000,95100.000000,253.512422)}
{pt3dadd(160512.000000,97452.000000,95200.000000,255.775202)}
{pt3dadd(160428.000000,97500.000000,95250.000000,267.683090)}
{pt3dadd(160320.000000,97536.000000,95325.000000,265.188374)}
{pt3dadd(160236.000000,97572.000000,95425.000000,257.323788)}
{pt3dadd(160212.000000,97608.000000,95500.000000,254.704338)}
{pt3dadd(160164.000000,97596.000000,95625.000000,259.574968)}
{pt3dadd(160116.000000,97608.000000,95725.000000,256.955518)}
{pt3dadd(160056.000000,97644.000000,95825.000000,264.820104)}
{pt3dadd(160032.000000,97716.000000,95925.000000,267.314820)}
{pt3dadd(160020.000000,97800.000000,96000.000000,267.314820)}
{pt3dadd(159960.000000,97872.000000,96100.000000,262.444190)}
{pt3dadd(159912.000000,97872.000000,96200.000000,270.702000)}
{pt3dadd(159900.000000,97896.000000,96350.000000,260.461500)}
{pt3dadd(159828.000000,97920.000000,96450.000000,253.328090)}
{pt3dadd(159732.000000,98004.000000,96550.000000,244.039652)}
{pt3dadd(159708.000000,98052.000000,96675.000000,241.776872)}
{pt3dadd(159648.000000,98100.000000,96825.000000,224.230624)}
{pt3dadd(159636.000000,98136.000000,97000.000000,224.230624)}
{pt3dadd(159624.000000,98172.000000,97125.000000,231.364034)}
{pt3dadd(159612.000000,98232.000000,97275.000000,233.519062)}
{pt3dadd(159588.000000,98292.000000,97425.000000,233.519062)}
{pt3dadd(159540.000000,98340.000000,97575.000000,233.519062)}
{pt3dadd(159480.000000,98364.000000,97700.000000,225.094174)}
{pt3dadd(159408.000000,98400.000000,97800.000000,215.805736)}
{pt3dadd(159408.000000,98484.000000,97925.000000,215.805736)}
{pt3dadd(159420.000000,98544.000000,98025.000000,215.805736)}
{pt3dadd(159420.000000,98592.000000,98150.000000,220.223544)}
{pt3dadd(159384.000000,98616.000000,98250.000000,231.024346)}
{pt3dadd(159336.000000,98676.000000,98375.000000,242.932234)}
{pt3dadd(159264.000000,98712.000000,98450.000000,255.435514)}
{pt3dadd(159216.000000,98760.000000,98575.000000,277.043038)}
{pt3dadd(159132.000000,98808.000000,98650.000000,293.203822)}
{pt3dadd(159060.000000,98844.000000,98725.000000,313.515804)}
{pt3dadd(158988.000000,98892.000000,98775.000000,328.713620)}
{pt3dadd(158868.000000,98904.000000,98875.000000,344.671332)}
{pt3dadd(158796.000000,98928.000000,98950.000000,344.671332)}
{pt3dadd(158700.000000,98904.000000,99025.000000,344.671332)}
{pt3dadd(158580.000000,98916.000000,99000.000000,340.431367)}
{pt3dadd(158472.000000,98940.000000,99000.000000,318.395720)}

{create adhoc20}
{access adhoc20}
{connect adhoc20(1), adhoc19(0)}
{nseg = 1}
{strdef color color = "White"}
{pt3dclear()}
{pt3dadd(158472.000000,98940.000000,99000.000000,318.395720)}
{pt3dadd(158460.000000,98964.000000,99125.000000,376.909240)}
{pt3dadd(158496.000000,99012.000000,99250.000000,370.920300)}
{pt3dadd(158472.000000,99000.000000,99475.000000,346.334628)}
{pt3dadd(158484.000000,99072.000000,99675.000000,288.595516)}
{pt3dadd(158556.000000,99228.000000,99950.000000,255.547132)}
{pt3dadd(158484.000000,99228.000000,100275.000000,183.982816)}
{pt3dadd(158448.000000,99252.000000,100600.000000,175.096968)}
{pt3dadd(158628.000000,99180.000000,100925.000000,162.463496)}
{pt3dadd(158760.000000,99120.000000,101150.000000,152.046112)}
{pt3dadd(158880.000000,99096.000000,101500.000000,153.577648)}
{pt3dadd(158988.000000,99096.000000,101800.000000,149.198352)}
{pt3dadd(159024.000000,98928.000000,102050.000000,147.666816)}
{pt3dadd(159012.000000,98988.000000,102350.000000,146.406816)}
{pt3dadd(159024.000000,98964.000000,102600.000000,142.236056)}
{pt3dadd(159132.000000,98880.000000,102875.000000,135.273760)}
{pt3dadd(159108.000000,98832.000000,103200.000000,133.950760)}
{pt3dadd(159360.000000,98832.000000,103500.000000,133.950760)}
{pt3dadd(159540.000000,98808.000000,103725.000000,135.210760)}
{pt3dadd(159732.000000,98844.000000,103925.000000,139.381520)}
{pt3dadd(159900.000000,98928.000000,104150.000000,146.343816)}
{pt3dadd(160068.000000,99000.000000,104350.000000,155.342746)}
{pt3dadd(160224.000000,99144.000000,104600.000000,169.967566)}
{pt3dadd(160344.000000,99324.000000,104800.000000,193.401840)}
{pt3dadd(160476.000000,99516.000000,105000.000000,220.529940)}
{pt3dadd(160644.000000,99660.000000,105200.000000,227.461116)}
{pt3dadd(160836.000000,99816.000000,105400.000000,224.164482)}
{pt3dadd(161088.000000,99996.000000,105625.000000,208.081052)}
{pt3dadd(161388.000000,100056.000000,105825.000000,199.234922)}
{pt3dadd(161568.000000,100188.000000,106100.000000,182.524206)}
{pt3dadd(161784.000000,100236.000000,106325.000000,177.201144)}
{pt3dadd(162252.000000,100332.000000,106400.000000,186.086992)}
{pt3dadd(162564.000000,100512.000000,106500.000000,192.373772)}
{pt3dadd(162876.000000,100680.000000,106675.000000,181.956388)}
{pt3dadd(163032.000000,100788.000000,106825.000000,167.368244)}
{pt3dadd(163308.000000,100944.000000,107075.000000,161.380834)}
{pt3dadd(163512.000000,101040.000000,107350.000000,148.115690)}
{pt3dadd(163500.000000,101124.000000,107675.000000,149.888640)}
{pt3dadd(163560.000000,101328.000000,107950.000000,149.888640)}
{pt3dadd(163548.000000,101628.000000,108150.000000,154.059400)}
{pt3dadd(163572.000000,101760.000000,108425.000000,152.736400)}
{pt3dadd(163524.000000,101892.000000,108675.000000,162.185280)}
{pt3dadd(163596.000000,102180.000000,108875.000000,191.816504)}
{pt3dadd(163548.000000,102528.000000,109125.000000,200.279216)}
{pt3dadd(163572.000000,102972.000000,109375.000000,219.542730)}
{pt3dadd(163668.000000,103428.000000,109550.000000,213.814833)}
{pt3dadd(163848.000000,103992.000000,109725.000000,212.041883)}
{pt3dadd(164040.000000,104352.000000,109800.000000,171.638779)}
{pt3dadd(164376.000000,104472.000000,109875.000000,161.717457)}
{pt3dadd(164640.000000,104640.000000,110050.000000,138.283183)}
{pt3dadd(164820.000000,104892.000000,110250.000000,148.181840)}
{pt3dadd(165132.000000,105168.000000,110475.000000,140.505910)}
{pt3dadd(165288.000000,105396.000000,110625.000000,140.505910)}
{pt3dadd(165600.000000,105672.000000,110875.000000,139.116760)}
{pt3dadd(165888.000000,105960.000000,110925.000000,141.828910)}
{pt3dadd(166080.000000,106056.000000,110925.000000,136.398150)}
{pt3dadd(166272.000000,106356.000000,111000.000000,136.398150)}
{pt3dadd(166560.000000,106512.000000,111100.000000,136.398150)}
{pt3dadd(166824.000000,106644.000000,111100.000000,136.398150)}
{pt3dadd(167244.000000,106848.000000,111025.000000,127.958103)}
{pt3dadd(167664.000000,107052.000000,111025.000000,122.502963)}
{pt3dadd(167892.000000,107244.000000,111025.000000,111.776315)}
{pt3dadd(168156.000000,107268.000000,111125.000000,106.048418)}
{pt3dadd(168456.000000,107388.000000,111300.000000,98.997521)}
{pt3dadd(168816.000000,107676.000000,111425.000000,98.997521)}
{pt3dadd(168996.000000,107904.000000,111550.000000,101.021369)}
{pt3dadd(169116.000000,108348.000000,111700.000000,102.769645)}
{pt3dadd(169248.000000,108732.000000,111875.000000,100.842170)}
{pt3dadd(169392.000000,109032.000000,112075.000000,100.842170)}
{pt3dadd(169512.000000,109296.000000,112200.000000,100.842170)}
{pt3dadd(169620.000000,109656.000000,112450.000000,99.805565)}
{pt3dadd(169584.000000,109920.000000,112650.000000,100.745797)}
{pt3dadd(169740.000000,110268.000000,112800.000000,103.709877)}
{pt3dadd(169992.000000,110544.000000,112975.000000,103.709877)}
{pt3dadd(170208.000000,110868.000000,113150.000000,108.177774)}
{pt3dadd(170292.000000,111384.000000,113300.000000,109.214379)}
{pt3dadd(170184.000000,111708.000000,113300.000000,117.252519)}
{pt3dadd(170220.000000,112020.000000,113400.000000,120.683811)}
{pt3dadd(170328.000000,112356.000000,113575.000000,127.734708)}
{pt3dadd(170400.000000,112680.000000,113750.000000,127.734708)}
{pt3dadd(170508.000000,113064.000000,113925.000000,125.710860)}
{pt3dadd(170724.000000,113460.000000,114100.000000,120.785002)}
{pt3dadd(170796.000000,113928.000000,114250.000000,120.785002)}
{pt3dadd(170856.000000,114252.000000,114300.000000,126.772412)}
{pt3dadd(170844.000000,114576.000000,114375.000000,142.620556)}
{pt3dadd(170892.000000,114912.000000,114375.000000,156.646106)}
{pt3dadd(170868.000000,115116.000000,114375.000000,183.683238)}
{pt3dadd(170724.000000,115392.000000,114150.000000,197.576710)}
{pt3dadd(170736.000000,115704.000000,113925.000000,204.596927)}
{pt3dadd(170688.000000,115788.000000,113600.000000,195.467360)}

{create adhoc21}
{access adhoc21}
{connect adhoc21(1), adhoc19(0)}
{nseg = 1}
{strdef color color = "White"}
{pt3dclear()}
{pt3dadd(158472.000000,98940.000000,99000.000000,318.395720)}
{pt3dadd(158376.000000,98952.000000,99000.000000,346.574413)}
{pt3dadd(158280.000000,98940.000000,99000.000000,329.816192)}
{pt3dadd(158184.000000,98904.000000,99000.000000,323.895908)}
{pt3dadd(158088.000000,98856.000000,99000.000000,312.041244)}
{pt3dadd(157992.000000,98820.000000,99000.000000,277.739396)}
{pt3dadd(157896.000000,98820.000000,99000.000000,258.394652)}
{pt3dadd(157800.000000,98808.000000,99000.000000,242.479684)}
{pt3dadd(157704.000000,98796.000000,99000.000000,215.351584)}
{pt3dadd(157596.000000,98784.000000,99000.000000,195.802074)}
{pt3dadd(157500.000000,98784.000000,99000.000000,189.933402)}
{pt3dadd(157392.000000,98772.000000,99000.000000,177.873972)}
{pt3dadd(157332.000000,98700.000000,99000.000000,172.550910)}
{pt3dadd(157272.000000,98628.000000,98900.000000,174.082446)}
{pt3dadd(157176.000000,98580.000000,98900.000000,172.393926)}
{pt3dadd(157092.000000,98544.000000,98900.000000,172.393926)}
{pt3dadd(156936.000000,98496.000000,98825.000000,167.565756)}
{pt3dadd(156816.000000,98472.000000,98725.000000,167.565756)}
{pt3dadd(156684.000000,98436.000000,98725.000000,172.635340)}
{pt3dadd(156588.000000,98400.000000,98725.000000,172.635340)}
{pt3dadd(156504.000000,98364.000000,98725.000000,172.635340)}
{pt3dadd(156420.000000,98304.000000,98700.000000,177.463510)}
{pt3dadd(156324.000000,98268.000000,98600.000000,196.082090)}
{pt3dadd(156204.000000,98232.000000,98600.000000,197.943682)}
{pt3dadd(156096.000000,98172.000000,98550.000000,190.633272)}
{pt3dadd(156000.000000,98124.000000,98550.000000,187.171802)}
{pt3dadd(155904.000000,98088.000000,98550.000000,185.483282)}
{pt3dadd(155808.000000,98040.000000,98550.000000,163.725052)}
{pt3dadd(155736.000000,97992.000000,98475.000000,156.793876)}
{pt3dadd(155664.000000,97944.000000,98475.000000,167.565756)}
{pt3dadd(155580.000000,97908.000000,98475.000000,171.027226)}
{pt3dadd(155496.000000,97872.000000,98475.000000,171.027226)}
{pt3dadd(155400.000000,97860.000000,98475.000000,174.166876)}
{pt3dadd(155304.000000,97860.000000,98475.000000,174.166876)}
{pt3dadd(155232.000000,97812.000000,98475.000000,172.393926)}
{pt3dadd(155148.000000,97800.000000,98400.000000,174.255518)}
{pt3dadd(155064.000000,97776.000000,98400.000000,172.647404)}
{pt3dadd(154968.000000,97740.000000,98400.000000,176.108874)}
{pt3dadd(154872.000000,97704.000000,98400.000000,179.405508)}
{pt3dadd(154752.000000,97644.000000,98400.000000,181.178458)}
{pt3dadd(154680.000000,97644.000000,98400.000000,179.316866)}
{pt3dadd(154596.000000,97608.000000,98400.000000,184.386450)}
{pt3dadd(154524.000000,97572.000000,98400.000000,179.316866)}
{pt3dadd(154476.000000,97512.000000,98375.000000,186.958488)}
{pt3dadd(154404.000000,97476.000000,98300.000000,183.497018)}
{pt3dadd(154332.000000,97428.000000,98300.000000,181.724068)}
{pt3dadd(154236.000000,97368.000000,98300.000000,183.585660)}
{pt3dadd(154152.000000,97320.000000,98300.000000,185.193774)}
{pt3dadd(154068.000000,97248.000000,98200.000000,179.325102)}
{pt3dadd(153996.000000,97212.000000,98200.000000,181.013622)}
{pt3dadd(153876.000000,97176.000000,98125.000000,188.655244)}
{pt3dadd(153768.000000,97152.000000,98125.000000,192.662324)}
{pt3dadd(153660.000000,97116.000000,98125.000000,204.147494)}
{pt3dadd(153540.000000,97092.000000,98125.000000,230.594758)}
{pt3dadd(153420.000000,97032.000000,98125.000000,247.524818)}
{pt3dadd(153300.000000,96984.000000,98125.000000,259.432706)}
{pt3dadd(153204.000000,96972.000000,98050.000000,274.091014)}
{pt3dadd(153096.000000,96936.000000,98050.000000,278.729708)}
{pt3dadd(152988.000000,96900.000000,98050.000000,258.151116)}
{pt3dadd(152916.000000,96876.000000,97950.000000,251.017706)}
{pt3dadd(152832.000000,96864.000000,97875.000000,241.264846)}
{pt3dadd(152748.000000,96780.000000,97800.000000,228.761566)}
{pt3dadd(152664.000000,96660.000000,97750.000000,219.915436)}
{pt3dadd(152604.000000,96612.000000,97700.000000,217.863028)}
{pt3dadd(152496.000000,96528.000000,97650.000000,209.839328)}
{pt3dadd(152388.000000,96528.000000,97600.000000,203.677220)}
{pt3dadd(152280.000000,96528.000000,97525.000000,195.653520)}
{pt3dadd(152184.000000,96504.000000,97525.000000,191.837256)}
{pt3dadd(152088.000000,96444.000000,97475.000000,179.961262)}
{pt3dadd(152004.000000,96384.000000,97475.000000,174.891678)}
{pt3dadd(151908.000000,96336.000000,97475.000000,164.970356)}
{pt3dadd(151824.000000,96276.000000,97425.000000,159.900772)}
{pt3dadd(151728.000000,96216.000000,97400.000000,156.439302)}
{pt3dadd(151644.000000,96168.000000,97375.000000,157.897912)}
{pt3dadd(151560.000000,96108.000000,97325.000000,161.194546)}
{pt3dadd(151452.000000,96036.000000,97275.000000,167.481326)}
{pt3dadd(151356.000000,95976.000000,97225.000000,167.481326)}
{pt3dadd(151260.000000,95916.000000,97125.000000,167.481326)}
{pt3dadd(151212.000000,95844.000000,97125.000000,172.309496)}
{pt3dadd(151152.000000,95784.000000,97050.000000,174.082446)}
{pt3dadd(151080.000000,95712.000000,97050.000000,172.393926)}
{pt3dadd(151008.000000,95628.000000,97050.000000,169.403780)}
{pt3dadd(150948.000000,95568.000000,96975.000000,172.865250)}
{pt3dadd(150864.000000,95496.000000,96975.000000,174.638200)}
{pt3dadd(150756.000000,95400.000000,96925.000000,187.300594)}
{pt3dadd(150648.000000,95340.000000,96825.000000,208.538624)}
{pt3dadd(150516.000000,95304.000000,96800.000000,243.045618)}
{pt3dadd(150396.000000,95280.000000,96700.000000,272.676842)}
{pt3dadd(150276.000000,95244.000000,96675.000000,299.124106)}
{pt3dadd(150156.000000,95220.000000,96650.000000,319.436088)}
{pt3dadd(150060.000000,95220.000000,96550.000000,325.074448)}
{pt3dadd(149964.000000,95172.000000,96500.000000,319.154164)}
{pt3dadd(149916.000000,95184.000000,96375.000000,312.937860)}
{pt3dadd(149868.000000,95184.000000,96275.000000,319.464972)}
{pt3dadd(149808.000000,95220.000000,96200.000000,307.017576)}
{pt3dadd(149772.000000,95256.000000,96075.000000,296.265050)}
{pt3dadd(149676.000000,95340.000000,96000.000000,270.668486)}
{pt3dadd(149604.000000,95424.000000,95900.000000,243.792096)}
{pt3dadd(149520.000000,95508.000000,95900.000000,210.817720)}
{pt3dadd(149448.000000,95592.000000,95850.000000,188.517790)}
{pt3dadd(149364.000000,95676.000000,95825.000000,174.082446)}
{pt3dadd(149244.000000,95760.000000,95825.000000,182.968294)}
{pt3dadd(149112.000000,95808.000000,95775.000000,188.291356)}
{pt3dadd(149016.000000,95856.000000,95675.000000,192.107620)}
{pt3dadd(148920.000000,95880.000000,95575.000000,195.742162)}
{pt3dadd(148860.000000,95892.000000,95425.000000,195.742162)}
{pt3dadd(148812.000000,95868.000000,95300.000000,192.667577)}
{pt3dadd(148716.000000,95868.000000,95225.000000,177.294650)}

{create adhoc22}
{access adhoc22}
{connect adhoc22(1), adhoc18(0)}
{nseg = 1}
{strdef color color = "White"}
{pt3dclear()}
{pt3dadd(171420.000000,98388.000000,84600.000000,729.768860)}
{pt3dadd(171516.000000,98364.000000,84725.000000,741.931660)}
{pt3dadd(171696.000000,98352.000000,84875.000000,751.661900)}
{pt3dadd(171792.000000,98364.000000,85025.000000,766.622148)}
{pt3dadd(171960.000000,98328.000000,85200.000000,779.028207)}
{pt3dadd(172116.000000,98316.000000,85350.000000,804.570100)}

{create adhoc23}
{access adhoc23}
{connect adhoc23(1), adhoc22(0)}
{nseg = 1}
{strdef color color = "White"}
{pt3dclear()}
{pt3dadd(172116.000000,98316.000000,85350.000000,804.570100)}
{pt3dadd(172188.000000,98172.000000,85500.000000,845.469117)}
{pt3dadd(172260.000000,98052.000000,85500.000000,738.401746)}
{pt3dadd(172272.000000,97896.000000,85500.000000,627.382000)}
{pt3dadd(172296.000000,97740.000000,85500.000000,497.515742)}
{pt3dadd(172320.000000,97584.000000,85500.000000,355.566952)}
{pt3dadd(172284.000000,97428.000000,85500.000000,226.815228)}
{pt3dadd(172284.000000,97332.000000,85500.000000,193.840852)}
{pt3dadd(172224.000000,97212.000000,85500.000000,179.405508)}
{pt3dadd(172200.000000,97152.000000,85500.000000,198.070896)}
{pt3dadd(172164.000000,97104.000000,85500.000000,205.712518)}
{pt3dadd(172236.000000,97032.000000,85450.000000,228.558662)}
{pt3dadd(172200.000000,96960.000000,85400.000000,238.845142)}
{pt3dadd(172200.000000,96852.000000,85400.000000,244.434356)}
{pt3dadd(172188.000000,96768.000000,85400.000000,229.776048)}
{pt3dadd(172080.000000,96744.000000,85275.000000,231.931076)}
{pt3dadd(171960.000000,96600.000000,85150.000000,214.154516)}
{pt3dadd(171876.000000,96444.000000,85125.000000,198.798452)}
{pt3dadd(171756.000000,96312.000000,85025.000000,191.520718)}
{pt3dadd(171768.000000,96072.000000,84925.000000,187.513638)}
{pt3dadd(171720.000000,96024.000000,84850.000000,179.489938)}
{pt3dadd(171708.000000,95892.000000,84825.000000,179.489938)}
{pt3dadd(171684.000000,95832.000000,84725.000000,182.786572)}
{pt3dadd(171684.000000,95736.000000,84650.000000,194.271742)}
{pt3dadd(171672.000000,95616.000000,84550.000000,196.226414)}
{pt3dadd(171696.000000,95412.000000,84450.000000,202.095086)}
{pt3dadd(171612.000000,95328.000000,84325.000000,205.911350)}
{pt3dadd(171600.000000,95268.000000,84200.000000,213.552972)}
{pt3dadd(171672.000000,95148.000000,84025.000000,209.345536)}
{pt3dadd(171720.000000,95040.000000,83875.000000,211.397944)}
{pt3dadd(171768.000000,94944.000000,83700.000000,205.529272)}
{pt3dadd(171720.000000,94800.000000,83550.000000,198.251538)}
{pt3dadd(171792.000000,94740.000000,83450.000000,192.382866)}
{pt3dadd(171792.000000,94668.000000,83325.000000,186.793652)}
{pt3dadd(171780.000000,94632.000000,83200.000000,177.463510)}
{pt3dadd(171816.000000,94572.000000,83075.000000,174.002040)}
{pt3dadd(171852.000000,94512.000000,82950.000000,179.325102)}
{pt3dadd(171900.000000,94368.000000,82850.000000,187.348802)}
{pt3dadd(171900.000000,94308.000000,82725.000000,192.938016)}
{pt3dadd(171936.000000,94116.000000,82525.000000,206.685966)}
{pt3dadd(171948.000000,94080.000000,82375.000000,218.171136)}
{pt3dadd(171936.000000,94044.000000,82275.000000,224.333244)}
{pt3dadd(171960.000000,93972.000000,82150.000000,224.333244)}
{pt3dadd(171972.000000,93948.000000,82000.000000,233.179374)}
{pt3dadd(171972.000000,93864.000000,81875.000000,238.050004)}
{pt3dadd(171996.000000,93828.000000,81725.000000,240.312784)}
{pt3dadd(171996.000000,93816.000000,81550.000000,249.669373)}
{pt3dadd(171960.000000,93768.000000,81450.000000,237.591800)}

{create adhoc24}
{access adhoc24}
{connect adhoc24(1), adhoc23(0)}
{nseg = 1}
{strdef color color = "White"}
{pt3dclear()}
{pt3dadd(171960.000000,93768.000000,81450.000000,237.591800)}
{pt3dadd(172020.000000,93780.000000,81375.000000,250.075267)}
{pt3dadd(172092.000000,93780.000000,81325.000000,261.242664)}
{pt3dadd(172176.000000,93792.000000,81225.000000,252.817776)}
{pt3dadd(172272.000000,93792.000000,81225.000000,248.399968)}
{pt3dadd(172356.000000,93804.000000,81150.000000,230.623408)}
{pt3dadd(172440.000000,93816.000000,81150.000000,204.176144)}
{pt3dadd(172524.000000,93816.000000,81100.000000,185.829934)}
{pt3dadd(172608.000000,93768.000000,80975.000000,180.506872)}
{pt3dadd(172728.000000,93768.000000,80850.000000,165.189320)}
{pt3dadd(172836.000000,93756.000000,80750.000000,157.129590)}
{pt3dadd(172956.000000,93768.000000,80625.000000,146.357710)}
{pt3dadd(173088.000000,93792.000000,80575.000000,162.441140)}
{pt3dadd(173184.000000,93828.000000,80550.000000,155.130730)}
{pt3dadd(173280.000000,93828.000000,80450.000000,155.130730)}
{pt3dadd(173364.000000,93804.000000,80425.000000,152.418580)}
{pt3dadd(173460.000000,93792.000000,80400.000000,152.418580)}
{pt3dadd(173556.000000,93804.000000,80375.000000,134.946000)}
{pt3dadd(173688.000000,93780.000000,80275.000000,132.486000)}
{pt3dadd(173832.000000,93780.000000,80275.000000,128.703000)}
{pt3dadd(173952.000000,93756.000000,80275.000000,128.703000)}
{pt3dadd(174072.000000,93744.000000,80200.000000,128.703000)}
{pt3dadd(174180.000000,93732.000000,80150.000000,130.092150)}
{pt3dadd(174288.000000,93708.000000,80075.000000,133.875150)}
{pt3dadd(174420.000000,93708.000000,80075.000000,143.645560)}
{pt3dadd(174552.000000,93708.000000,80075.000000,147.816320)}
{pt3dadd(174720.000000,93732.000000,80075.000000,156.815250)}
{pt3dadd(174876.000000,93744.000000,80075.000000,159.805396)}
{pt3dadd(175008.000000,93708.000000,80075.000000,162.653156)}
{pt3dadd(175152.000000,93684.000000,80075.000000,162.653156)}
{pt3dadd(175296.000000,93660.000000,80075.000000,195.701540)}
{pt3dadd(175428.000000,93660.000000,80075.000000,230.448866)}
{pt3dadd(175572.000000,93672.000000,80100.000000,279.426350)}
{pt3dadd(175680.000000,93708.000000,80125.000000,351.031280)}

{create adhoc25}
{access adhoc25}
{connect adhoc25(1), adhoc24(0)}
{nseg = 1}
{strdef color color = "White"}
{pt3dclear()}
{pt3dadd(175680.000000,93708.000000,80125.000000,351.031280)}
{pt3dadd(175932.000000,93756.000000,79700.000000,425.342307)}
{pt3dadd(176244.000000,93900.000000,79400.000000,437.335880)}
{pt3dadd(176292.000000,93804.000000,79125.000000,387.012000)}

{create adhoc26}
{access adhoc26}
{connect adhoc26(1), adhoc25(0)}
{nseg = 1}
{strdef color color = "White"}
{pt3dclear()}
{pt3dadd(176292.000000,93804.000000,79125.000000,387.012000)}
{pt3dadd(176076.000000,93936.000000,79000.000000,246.296503)}
{pt3dadd(175692.000000,93924.000000,78675.000000,114.285710)}

{create adhoc27}
{access adhoc27}
{connect adhoc27(1), adhoc25(0)}
{nseg = 1}
{strdef color color = "White"}
{pt3dclear()}
{pt3dadd(176292.000000,93804.000000,79125.000000,387.012000)}
{pt3dadd(176760.000000,94044.000000,78975.000000,218.196117)}
{pt3dadd(176904.000000,94188.000000,78775.000000,168.852050)}

{create adhoc28}
{access adhoc28}
{connect adhoc28(1), adhoc24(0)}
{nseg = 1}
{strdef color color = "White"}
{pt3dclear()}
{pt3dadd(175680.000000,93708.000000,80125.000000,351.031280)}
{pt3dadd(175776.000000,93744.000000,80150.000000,238.161777)}
{pt3dadd(175908.000000,93756.000000,80200.000000,223.038682)}
{pt3dadd(176028.000000,93768.000000,80250.000000,195.932978)}
{pt3dadd(176148.000000,93768.000000,80275.000000,205.729628)}
{pt3dadd(176232.000000,93816.000000,80375.000000,209.545892)}
{pt3dadd(176364.000000,93840.000000,80425.000000,220.346694)}
{pt3dadd(176508.000000,93900.000000,80425.000000,237.057410)}
{pt3dadd(176652.000000,93948.000000,80500.000000,235.005002)}
{pt3dadd(176736.000000,93912.000000,80600.000000,228.842894)}
{pt3dadd(176832.000000,93852.000000,80700.000000,229.834127)}
{pt3dadd(176916.000000,93804.000000,80800.000000,195.467360)}

{create adhoc29}
{access adhoc29}
{connect adhoc29(1), adhoc28(0)}
{nseg = 1}
{strdef color color = "White"}
{pt3dclear()}
{pt3dadd(176916.000000,93804.000000,80800.000000,195.467360)}
{pt3dadd(176976.000000,93756.000000,80775.000000,205.737540)}
{pt3dadd(177048.000000,93696.000000,80775.000000,201.722548)}
{pt3dadd(177132.000000,93636.000000,80775.000000,205.729628)}
{pt3dadd(177252.000000,93576.000000,80775.000000,202.095086)}
{pt3dadd(177384.000000,93504.000000,80775.000000,194.071386)}
{pt3dadd(177504.000000,93492.000000,80850.000000,192.298436)}
{pt3dadd(177636.000000,93468.000000,80850.000000,185.020702)}
{pt3dadd(177756.000000,93444.000000,80850.000000,181.013622)}
{pt3dadd(177864.000000,93456.000000,80900.000000,186.602836)}
{pt3dadd(177960.000000,93456.000000,80900.000000,194.626536)}
{pt3dadd(178092.000000,93468.000000,80900.000000,206.685966)}
{pt3dadd(178224.000000,93492.000000,80900.000000,216.016108)}
{pt3dadd(178344.000000,93504.000000,80900.000000,217.970780)}
{pt3dadd(178452.000000,93528.000000,80900.000000,222.178216)}
{pt3dadd(178608.000000,93600.000000,80800.000000,224.440996)}
{pt3dadd(178716.000000,93672.000000,80800.000000,224.440996)}
{pt3dadd(178824.000000,93756.000000,80800.000000,226.596024)}
{pt3dadd(178956.000000,93840.000000,80725.000000,224.641352)}
{pt3dadd(179076.000000,93912.000000,80725.000000,220.433916)}
{pt3dadd(179208.000000,93996.000000,80725.000000,216.016108)}
{pt3dadd(179292.000000,94080.000000,80650.000000,211.598300)}
{pt3dadd(179388.000000,94164.000000,80650.000000,209.443272)}
{pt3dadd(179436.000000,94224.000000,80575.000000,207.581680)}
{pt3dadd(179532.000000,94356.000000,80550.000000,201.992466)}
{pt3dadd(179592.000000,94452.000000,80425.000000,192.985603)}
{pt3dadd(179628.000000,94572.000000,80350.000000,177.294650)}

{create adhoc30}
{access adhoc30}
{connect adhoc30(1), adhoc29(0)}
{nseg = 1}
{strdef color color = "White"}
{pt3dclear()}
{pt3dadd(179628.000000,94572.000000,80350.000000,177.294650)}
{pt3dadd(179724.000000,94596.000000,80300.000000,167.456350)}
{pt3dadd(179820.000000,94656.000000,80275.000000,197.886444)}
{pt3dadd(179916.000000,94704.000000,80250.000000,201.520986)}
{pt3dadd(180036.000000,94704.000000,80125.000000,227.510177)}
{pt3dadd(180168.000000,94728.000000,80100.000000,195.467360)}

{create adhoc31}
{access adhoc31}
{connect adhoc31(1), adhoc30(0)}
{nseg = 1}
{strdef color color = "White"}
{pt3dclear()}
{pt3dadd(180168.000000,94728.000000,80100.000000,195.467360)}
{pt3dadd(180264.000000,94680.000000,80100.000000,173.513920)}
{pt3dadd(180384.000000,94656.000000,80100.000000,161.470648)}
{pt3dadd(180516.000000,94656.000000,80100.000000,165.477728)}
{pt3dadd(180660.000000,94668.000000,80100.000000,160.408144)}
{pt3dadd(180768.000000,94644.000000,80175.000000,164.787440)}
{pt3dadd(180900.000000,94632.000000,80200.000000,179.041907)}
{pt3dadd(180984.000000,94620.000000,80250.000000,160.811480)}

{create adhoc32}
{access adhoc32}
{connect adhoc32(1), adhoc30(0)}
{nseg = 1}
{strdef color color = "White"}
{pt3dclear()}
{pt3dadd(180168.000000,94728.000000,80100.000000,195.467360)}
{pt3dadd(180192.000000,94812.000000,80175.000000,198.725147)}
{pt3dadd(180240.000000,94980.000000,80175.000000,205.846920)}
{pt3dadd(180288.000000,95136.000000,80175.000000,205.846920)}
{pt3dadd(180336.000000,95208.000000,80125.000000,205.846920)}
{pt3dadd(180396.000000,95316.000000,80125.000000,202.030656)}
{pt3dadd(180444.000000,95412.000000,80125.000000,196.707594)}
{pt3dadd(180540.000000,95520.000000,80000.000000,183.492937)}
{pt3dadd(180564.000000,95544.000000,79850.000000,168.852050)}

{create adhoc33}
{access adhoc33}
{connect adhoc33(1), adhoc29(0)}
{nseg = 1}
{strdef color color = "White"}
{pt3dclear()}
{pt3dadd(179628.000000,94572.000000,80350.000000,177.294650)}
{pt3dadd(179532.000000,94608.000000,80225.000000,282.240550)}
{pt3dadd(179436.000000,94644.000000,80150.000000,293.670274)}
{pt3dadd(179304.000000,94680.000000,80100.000000,321.890488)}
{pt3dadd(179184.000000,94704.000000,79950.000000,303.466924)}
{pt3dadd(179076.000000,94680.000000,79850.000000,287.689780)}
{pt3dadd(178992.000000,94632.000000,79750.000000,226.277900)}

{create adhoc34}
{access adhoc34}
{connect adhoc34(1), adhoc28(0)}
{nseg = 1}
{strdef color color = "White"}
{pt3dclear()}
{pt3dadd(176916.000000,93804.000000,80800.000000,195.467360)}
{pt3dadd(176820.000000,93840.000000,80800.000000,248.428547)}
{pt3dadd(176736.000000,93876.000000,80800.000000,279.910184)}
{pt3dadd(176664.000000,93900.000000,80800.000000,298.575572)}
{pt3dadd(176592.000000,93936.000000,80800.000000,286.105780)}
{pt3dadd(176508.000000,93972.000000,80900.000000,264.326460)}
{pt3dadd(176520.000000,93900.000000,80975.000000,153.153800)}

{create adhoc35}
{access adhoc35}
{connect adhoc35(1), adhoc23(0)}
{nseg = 1}
{strdef color color = "White"}
{pt3dclear()}
{pt3dadd(171960.000000,93768.000000,81450.000000,237.591800)}
{pt3dadd(171852.000000,93696.000000,81350.000000,293.738953)}
{pt3dadd(171744.000000,93624.000000,81375.000000,266.754532)}
{pt3dadd(171672.000000,93564.000000,81275.000000,260.284316)}
{pt3dadd(171600.000000,93480.000000,81250.000000,220.338154)}
{pt3dadd(171492.000000,93432.000000,81175.000000,206.377858)}
{pt3dadd(171384.000000,93360.000000,81125.000000,204.222830)}
{pt3dadd(171276.000000,93312.000000,81050.000000,196.199130)}
{pt3dadd(171156.000000,93252.000000,80950.000000,194.244458)}
{pt3dadd(171084.000000,93132.000000,80850.000000,207.992408)}
{pt3dadd(170988.000000,93060.000000,80750.000000,214.462624)}
{pt3dadd(170928.000000,92964.000000,80575.000000,212.410216)}
{pt3dadd(170832.000000,92868.000000,80475.000000,204.350486)}
{pt3dadd(170760.000000,92784.000000,80475.000000,199.027424)}
{pt3dadd(170736.000000,92700.000000,80400.000000,183.671360)}
{pt3dadd(170712.000000,92616.000000,80325.000000,171.611930)}
{pt3dadd(170652.000000,92544.000000,80225.000000,166.022716)}
{pt3dadd(170568.000000,92484.000000,80200.000000,179.951118)}
{pt3dadd(170472.000000,92412.000000,80100.000000,172.640708)}
{pt3dadd(170400.000000,92352.000000,80025.000000,172.640708)}
{pt3dadd(170316.000000,92316.000000,79950.000000,172.640708)}
{pt3dadd(170256.000000,92280.000000,79950.000000,167.812538)}
{pt3dadd(170172.000000,92196.000000,79875.000000,156.874282)}
{pt3dadd(170148.000000,92124.000000,79775.000000,161.045042)}
{pt3dadd(170076.000000,92040.000000,79675.000000,156.665746)}
{pt3dadd(170004.000000,91992.000000,79575.000000,150.378966)}
{pt3dadd(169956.000000,91932.000000,79550.000000,147.531206)}
{pt3dadd(169932.000000,91836.000000,79475.000000,140.568910)}
{pt3dadd(169896.000000,91800.000000,79375.000000,131.706858)}
{pt3dadd(169836.000000,91692.000000,79300.000000,124.655961)}
{pt3dadd(169776.000000,91632.000000,79175.000000,116.215914)}
{pt3dadd(169656.000000,91644.000000,79050.000000,110.201622)}
{pt3dadd(169560.000000,91596.000000,78950.000000,110.201622)}
{pt3dadd(169524.000000,91596.000000,78825.000000,113.632914)}
{pt3dadd(169428.000000,91632.000000,78750.000000,118.100811)}
{pt3dadd(169404.000000,91620.000000,78600.000000,122.568708)}
{pt3dadd(169356.000000,91620.000000,78450.000000,120.544860)}
{pt3dadd(169320.000000,91620.000000,78325.000000,117.113568)}
{pt3dadd(169296.000000,91596.000000,78125.000000,117.113568)}
{pt3dadd(169236.000000,91572.000000,78050.000000,118.373568)}
{pt3dadd(169236.000000,91548.000000,77925.000000,119.633568)}
{pt3dadd(169212.000000,91524.000000,77750.000000,125.088708)}
{pt3dadd(169212.000000,91500.000000,77550.000000,131.103000)}
{pt3dadd(169164.000000,91548.000000,77375.000000,132.363000)}
{pt3dadd(169104.000000,91572.000000,77225.000000,139.673410)}
{pt3dadd(169068.000000,91620.000000,77075.000000,139.673410)}
{pt3dadd(169080.000000,91668.000000,76950.000000,134.218270)}
{pt3dadd(169020.000000,91740.000000,76825.000000,124.344439)}
{pt3dadd(168936.000000,91764.000000,76675.000000,115.793608)}
{pt3dadd(168936.000000,91788.000000,76500.000000,108.483198)}
{pt3dadd(168936.000000,91800.000000,76350.000000,121.116670)}
{pt3dadd(168912.000000,91716.000000,76075.000000,142.419954)}
{pt3dadd(168864.000000,91728.000000,75900.000000,176.899775)}
{pt3dadd(168804.000000,91572.000000,75625.000000,206.508966)}
{pt3dadd(168852.000000,91488.000000,75375.000000,209.221116)}
{pt3dadd(169212.000000,91644.000000,75075.000000,230.774444)}
{pt3dadd(169236.000000,91548.000000,74775.000000,228.895517)}
{pt3dadd(169164.000000,91512.000000,74450.000000,303.234000)}

{create adhoc36}
{access adhoc36}
{connect adhoc36(1), adhoc35(0)}
{nseg = 1}
{strdef color color = "White"}
{pt3dclear()}
{pt3dadd(169164.000000,91512.000000,74450.000000,303.234000)}
{pt3dadd(168792.000000,91704.000000,74300.000000,286.502000)}
{pt3dadd(168528.000000,91944.000000,74275.000000,296.862507)}
{pt3dadd(168348.000000,92172.000000,74350.000000,334.315520)}

{create adhoc37}
{access adhoc37}
{connect adhoc37(1), adhoc35(0)}
{nseg = 1}
{strdef color color = "White"}
{pt3dclear()}
{pt3dadd(169164.000000,91512.000000,74450.000000,303.234000)}
{pt3dadd(169884.000000,91260.000000,74300.000000,236.858733)}
{pt3dadd(170340.000000,91056.000000,74150.000000,202.060536)}
{pt3dadd(170748.000000,90948.000000,74150.000000,166.613736)}
{pt3dadd(171144.000000,90852.000000,74150.000000,138.065296)}
{pt3dadd(171504.000000,90948.000000,74025.000000,138.065296)}
{pt3dadd(171840.000000,91020.000000,73950.000000,139.454446)}
{pt3dadd(172140.000000,91200.000000,73925.000000,142.751080)}
{pt3dadd(172404.000000,91284.000000,73750.000000,156.644552)}
{pt3dadd(172764.000000,91344.000000,73650.000000,173.285104)}
{pt3dadd(173124.000000,91320.000000,73550.000000,189.925656)}
{pt3dadd(173316.000000,91476.000000,73500.000000,208.271866)}
{pt3dadd(173508.000000,91596.000000,73500.000000,239.676040)}
{pt3dadd(173724.000000,91680.000000,73300.000000,255.591008)}
{pt3dadd(173964.000000,91788.000000,73125.000000,276.169600)}
{pt3dadd(174132.000000,91860.000000,72825.000000,282.963322)}
{pt3dadd(174240.000000,91992.000000,72675.000000,257.213670)}
{pt3dadd(174492.000000,92208.000000,72625.000000,214.350566)}
{pt3dadd(174708.000000,92328.000000,72425.000000,185.802126)}
{pt3dadd(174852.000000,92436.000000,72075.000000,141.867842)}
{pt3dadd(175080.000000,92484.000000,71775.000000,112.705671)}
{pt3dadd(175080.000000,92520.000000,71475.000000,112.705671)}
{pt3dadd(174996.000000,92556.000000,71150.000000,127.799143)}
{pt3dadd(175092.000000,92640.000000,70825.000000,171.545399)}
{pt3dadd(175200.000000,92508.000000,70500.000000,215.479683)}
{pt3dadd(175212.000000,92628.000000,70275.000000,252.506440)}
{pt3dadd(174864.000000,92316.000000,70025.000000,278.256092)}
{pt3dadd(174936.000000,91980.000000,69750.000000,281.593940)}
{pt3dadd(174948.000000,91872.000000,69425.000000,237.591800)}

{create adhoc38}
{access adhoc38}
{connect adhoc38(1), adhoc22(0)}
{nseg = 1}
{strdef color color = "White"}
{pt3dclear()}
{pt3dadd(172116.000000,98316.000000,85350.000000,804.570100)}
{pt3dadd(172056.000000,98460.000000,85625.000000,846.843567)}
{pt3dadd(172164.000000,98556.000000,85825.000000,814.609044)}
{pt3dadd(172284.000000,98712.000000,86025.000000,799.648796)}
{pt3dadd(172440.000000,98808.000000,86200.000000,766.622148)}
{pt3dadd(172620.000000,98904.000000,86375.000000,758.959580)}
{pt3dadd(172764.000000,99060.000000,86525.000000,751.661900)}
{pt3dadd(172944.000000,99168.000000,86650.000000,737.414036)}
{pt3dadd(173076.000000,99324.000000,86850.000000,723.844624)}
{pt3dadd(173208.000000,99348.000000,87075.000000,716.546944)}
{pt3dadd(173328.000000,99372.000000,87300.000000,740.703212)}
{pt3dadd(173472.000000,99420.000000,87500.000000,740.703212)}
{pt3dadd(173628.000000,99480.000000,87675.000000,782.192107)}
{pt3dadd(173820.000000,99624.000000,88025.000000,729.768860)}

{create adhoc39}
{access adhoc39}
{connect adhoc39(1), adhoc38(0)}
{nseg = 1}
{strdef color color = "White"}
{pt3dclear()}
{pt3dadd(173820.000000,99624.000000,88025.000000,729.768860)}
{pt3dadd(174000.000000,99696.000000,88350.000000,809.138873)}
{pt3dadd(174216.000000,99864.000000,88475.000000,849.169144)}
{pt3dadd(174348.000000,99960.000000,88675.000000,829.295718)}
{pt3dadd(174480.000000,100056.000000,88900.000000,836.958286)}
{pt3dadd(174540.000000,100140.000000,89075.000000,811.594206)}
{pt3dadd(174636.000000,100200.000000,89250.000000,764.319694)}
{pt3dadd(174792.000000,100284.000000,89425.000000,719.296334)}
{pt3dadd(174900.000000,100392.000000,89575.000000,719.296334)}
{pt3dadd(175008.000000,100404.000000,89750.000000,697.385902)}
{pt3dadd(175056.000000,100500.000000,89925.000000,662.552228)}
{pt3dadd(175164.000000,100596.000000,90075.000000,655.933000)}
{pt3dadd(175332.000000,100680.000000,90250.000000,669.502412)}
{pt3dadd(175548.000000,100860.000000,90375.000000,675.806426)}
{pt3dadd(175776.000000,100944.000000,90550.000000,690.054290)}
{pt3dadd(175896.000000,101088.000000,90750.000000,702.977532)}
{pt3dadd(175956.000000,101184.000000,90925.000000,716.546944)}
{pt3dadd(176088.000000,101316.000000,91100.000000,709.596760)}
{pt3dadd(176160.000000,101520.000000,91300.000000,730.463852)}
{pt3dadd(176232.000000,101772.000000,91600.000000,730.348020)}
{pt3dadd(176508.000000,102048.000000,91700.000000,766.257260)}

{create adhoc40}
{access adhoc40}
{connect adhoc40(1), adhoc39(0)}
{nseg = 1}
{strdef color color = "White"}
{pt3dclear()}
{pt3dadd(176508.000000,102048.000000,91700.000000,766.257260)}
{pt3dadd(176724.000000,101964.000000,91925.000000,805.208670)}
{pt3dadd(176892.000000,101820.000000,91925.000000,674.669982)}
{pt3dadd(177024.000000,101736.000000,91900.000000,543.187238)}
{pt3dadd(177108.000000,101688.000000,91900.000000,401.077846)}
{pt3dadd(177192.000000,101664.000000,91900.000000,250.922744)}
{pt3dadd(177264.000000,101640.000000,91900.000000,108.813352)}
{pt3dadd(177348.000000,101616.000000,91900.000000,96.987220)}
{pt3dadd(177432.000000,101616.000000,91900.000000,91.462657)}
{pt3dadd(177516.000000,101616.000000,91900.000000,88.128643)}
{pt3dadd(177576.000000,101616.000000,91900.000000,97.107015)}
{pt3dadd(177648.000000,101592.000000,91900.000000,107.474537)}
{pt3dadd(177696.000000,101544.000000,91900.000000,116.452909)}
{pt3dadd(177768.000000,101532.000000,91875.000000,126.668764)}
{pt3dadd(177852.000000,101520.000000,91875.000000,132.966858)}
{pt3dadd(177924.000000,101508.000000,91875.000000,123.988486)}
{pt3dadd(177996.000000,101496.000000,91875.000000,115.548439)}
{pt3dadd(178068.000000,101484.000000,91875.000000,114.225439)}
{pt3dadd(178152.000000,101484.000000,91875.000000,106.570067)}
{pt3dadd(178236.000000,101496.000000,91775.000000,103.605987)}
{pt3dadd(178320.000000,101508.000000,91750.000000,102.710528)}
{pt3dadd(178416.000000,101520.000000,91750.000000,98.222570)}
{pt3dadd(178512.000000,101520.000000,91750.000000,90.567198)}
{pt3dadd(178608.000000,101520.000000,91750.000000,89.671739)}
{pt3dadd(178692.000000,101508.000000,91750.000000,88.776280)}
{pt3dadd(178788.000000,101508.000000,91750.000000,87.923463)}
{pt3dadd(178872.000000,101484.000000,91750.000000,89.588487)}
{pt3dadd(178944.000000,101472.000000,91750.000000,87.840211)}
{pt3dadd(179016.000000,101460.000000,91750.000000,87.840211)}
{pt3dadd(179088.000000,101424.000000,91750.000000,90.663145)}
{pt3dadd(179160.000000,101400.000000,91775.000000,98.806793)}
{pt3dadd(179232.000000,101436.000000,91800.000000,107.357624)}
{pt3dadd(179304.000000,101424.000000,91850.000000,109.105900)}
{pt3dadd(179376.000000,101424.000000,91900.000000,117.656731)}
{pt3dadd(179436.000000,101412.000000,91900.000000,120.924628)}
{pt3dadd(179508.000000,101400.000000,91875.000000,127.886924)}
{pt3dadd(179568.000000,101388.000000,91925.000000,140.520396)}
{pt3dadd(179652.000000,101340.000000,91925.000000,174.104758)}
{pt3dadd(179736.000000,101292.000000,91925.000000,214.507862)}
{pt3dadd(179820.000000,101232.000000,91925.000000,254.187006)}
{pt3dadd(179940.000000,101196.000000,91850.000000,304.885397)}
{pt3dadd(180060.000000,101172.000000,91850.000000,318.395720)}

{create adhoc41}
{access adhoc41}
{connect adhoc41(1), adhoc40(0)}
{nseg = 1}
{strdef color color = "White"}
{pt3dclear()}
{pt3dadd(180060.000000,101172.000000,91850.000000,318.395720)}
{pt3dadd(180108.000000,100800.000000,92100.000000,250.484960)}
{pt3dadd(180156.000000,100620.000000,92100.000000,197.956880)}
{pt3dadd(180180.000000,100584.000000,92150.000000,160.811480)}

{create adhoc42}
{access adhoc42}
{connect adhoc42(1), adhoc40(0)}
{nseg = 1}
{strdef color color = "White"}
{pt3dclear()}
{pt3dadd(180060.000000,101172.000000,91850.000000,318.395720)}
{pt3dadd(180120.000000,101136.000000,91750.000000,387.012000)}

{create adhoc43}
{access adhoc43}
{connect adhoc43(1), adhoc42(0)}
{nseg = 1}
{strdef color color = "White"}
{pt3dclear()}
{pt3dadd(180120.000000,101136.000000,91750.000000,387.012000)}
{pt3dadd(180312.000000,101424.000000,91950.000000,368.875380)}
{pt3dadd(180420.000000,101520.000000,91975.000000,278.415988)}
{pt3dadd(180504.000000,101532.000000,92025.000000,240.107060)}
{pt3dadd(180528.000000,101580.000000,92100.000000,160.307053)}
{pt3dadd(180636.000000,101676.000000,92200.000000,195.467360)}

{create adhoc44}
{access adhoc44}
{connect adhoc44(1), adhoc42(0)}
{nseg = 1}
{strdef color color = "White"}
{pt3dclear()}
{pt3dadd(180120.000000,101136.000000,91750.000000,387.012000)}
{pt3dadd(180240.000000,101124.000000,91675.000000,208.965297)}
{pt3dadd(180348.000000,101124.000000,91675.000000,171.607680)}
{pt3dadd(180420.000000,101088.000000,91650.000000,119.405280)}
{pt3dadd(180468.000000,101052.000000,91550.000000,116.693130)}
{pt3dadd(180516.000000,101064.000000,91400.000000,116.693130)}
{pt3dadd(180540.000000,101040.000000,91300.000000,103.765125)}
{pt3dadd(180600.000000,100968.000000,91275.000000,101.442691)}
{pt3dadd(180660.000000,100920.000000,91275.000000,93.299043)}
{pt3dadd(180732.000000,100896.000000,91225.000000,83.083188)}
{pt3dadd(180768.000000,100800.000000,91175.000000,80.522706)}
{pt3dadd(180792.000000,100728.000000,91125.000000,79.012478)}
{pt3dadd(180864.000000,100692.000000,91075.000000,78.310863)}
{pt3dadd(180936.000000,100644.000000,91075.000000,79.163680)}
{pt3dadd(181008.000000,100608.000000,91075.000000,115.308525)}
{pt3dadd(181104.000000,100572.000000,91075.000000,146.582740)}
{pt3dadd(181176.000000,100548.000000,91125.000000,179.367182)}
{pt3dadd(181248.000000,100512.000000,91150.000000,180.805493)}
{pt3dadd(181308.000000,100488.000000,91200.000000,181.700952)}
{pt3dadd(181380.000000,100440.000000,91200.000000,145.556107)}
{pt3dadd(181488.000000,100440.000000,91250.000000,115.946916)}
{pt3dadd(181560.000000,100404.000000,91300.000000,85.484908)}
{pt3dadd(181608.000000,100380.000000,91275.000000,87.070646)}
{pt3dadd(181668.000000,100380.000000,91275.000000,86.703122)}
{pt3dadd(181740.000000,100380.000000,91250.000000,85.281760)}

{create adhoc45}
{access adhoc45}
{connect adhoc45(1), adhoc44(0)}
{nseg = 1}
{strdef color color = "White"}
{pt3dclear()}
{pt3dadd(181740.000000,100380.000000,91250.000000,85.281760)}
{pt3dadd(181728.000000,100320.000000,91300.000000,102.375868)}
{pt3dadd(181728.000000,100260.000000,91350.000000,97.286501)}
{pt3dadd(181668.000000,100200.000000,91375.000000,97.286501)}
{pt3dadd(181572.000000,100116.000000,91425.000000,87.882853)}
{pt3dadd(181548.000000,100044.000000,91425.000000,86.217829)}
{pt3dadd(181464.000000,99960.000000,91425.000000,86.217829)}
{pt3dadd(181404.000000,99936.000000,91425.000000,83.895395)}
{pt3dadd(181332.000000,99876.000000,91400.000000,82.309657)}
{pt3dadd(181284.000000,99840.000000,91400.000000,80.723919)}
{pt3dadd(181140.000000,99792.000000,91350.000000,79.950388)}
{pt3dadd(181092.000000,99732.000000,91350.000000,73.873472)}
{pt3dadd(180972.000000,99660.000000,91325.000000,70.134230)}
{pt3dadd(180900.000000,99576.000000,91275.000000,66.785247)}
{pt3dadd(180804.000000,99504.000000,91250.000000,61.785753)}
{pt3dadd(180720.000000,99432.000000,91225.000000,59.679237)}
{pt3dadd(180624.000000,99336.000000,91200.000000,60.315623)}
{pt3dadd(180552.000000,99300.000000,91125.000000,59.293443)}
{pt3dadd(180468.000000,99168.000000,91025.000000,65.976440)}
{pt3dadd(180396.000000,99084.000000,91000.000000,67.626951)}
{pt3dadd(180336.000000,99000.000000,90975.000000,66.384484)}
{pt3dadd(180276.000000,98916.000000,90975.000000,71.746483)}
{pt3dadd(180252.000000,98856.000000,90850.000000,60.608154)}

{create adhoc46}
{access adhoc46}
{connect adhoc46(1), adhoc44(0)}
{nseg = 1}
{strdef color color = "White"}
{pt3dclear()}
{pt3dadd(181740.000000,100380.000000,91250.000000,85.281760)}
{pt3dadd(181836.000000,100392.000000,91250.000000,74.196637)}
{pt3dadd(181920.000000,100392.000000,91225.000000,104.370754)}
{pt3dadd(182004.000000,100392.000000,91225.000000,102.048320)}
{pt3dadd(182088.000000,100380.000000,91175.000000,100.678500)}
{pt3dadd(182184.000000,100368.000000,91175.000000,101.314886)}
{pt3dadd(182280.000000,100344.000000,91150.000000,78.175911)}
{pt3dadd(182376.000000,100344.000000,91125.000000,77.280452)}
{pt3dadd(182436.000000,100344.000000,91175.000000,81.970727)}
{pt3dadd(182496.000000,100428.000000,91175.000000,89.545845)}

{create adhoc47}
{access adhoc47}
{connect adhoc47(1), adhoc39(0)}
{nseg = 1}
{strdef color color = "White"}
{pt3dclear()}
{pt3dadd(176508.000000,102048.000000,91700.000000,766.257260)}
{pt3dadd(176700.000000,102240.000000,91825.000000,766.257260)}

{create adhoc48}
{access adhoc48}
{connect adhoc48(1), adhoc47(0)}
{nseg = 1}
{strdef color color = "White"}
{pt3dclear()}
{pt3dadd(176700.000000,102240.000000,91825.000000,766.257260)}
{pt3dadd(176712.000000,102420.000000,92025.000000,805.208670)}
{pt3dadd(176844.000000,102600.000000,92000.000000,805.336384)}
{pt3dadd(176856.000000,102828.000000,92250.000000,812.998952)}
{pt3dadd(176916.000000,103008.000000,92675.000000,821.044662)}
{pt3dadd(176952.000000,103140.000000,92800.000000,805.336384)}
{pt3dadd(177036.000000,103224.000000,92800.000000,782.330426)}
{pt3dadd(177132.000000,103380.000000,92800.000000,782.330426)}
{pt3dadd(177084.000000,103476.000000,93125.000000,782.330426)}
{pt3dadd(177120.000000,103608.000000,93325.000000,774.284716)}
{pt3dadd(177132.000000,103680.000000,93525.000000,774.284716)}
{pt3dadd(177192.000000,103860.000000,93750.000000,767.334532)}
{pt3dadd(177384.000000,104124.000000,93950.000000,746.467440)}
{pt3dadd(177492.000000,104328.000000,94100.000000,711.633766)}
{pt3dadd(177564.000000,104484.000000,94300.000000,670.796266)}
{pt3dadd(177624.000000,104616.000000,94475.000000,626.457766)}
{pt3dadd(177684.000000,104784.000000,94625.000000,607.530698)}
{pt3dadd(177660.000000,104988.000000,94775.000000,589.504932)}
{pt3dadd(177684.000000,105216.000000,95000.000000,583.501106)}
{pt3dadd(177732.000000,105456.000000,95175.000000,583.501106)}
{pt3dadd(177696.000000,105636.000000,95250.000000,606.972514)}
{pt3dadd(177684.000000,105864.000000,95425.000000,612.976340)}
{pt3dadd(177720.000000,106056.000000,95600.000000,612.976340)}
{pt3dadd(177696.000000,106284.000000,95775.000000,618.980166)}
{pt3dadd(177816.000000,106524.000000,95950.000000,613.262240)}
{pt3dadd(177912.000000,106860.000000,96125.000000,589.790832)}
{pt3dadd(177960.000000,107124.000000,96300.000000,567.437098)}
{pt3dadd(178236.000000,107340.000000,96400.000000,551.865760)}
{pt3dadd(178308.000000,107568.000000,96500.000000,534.698366)}
{pt3dadd(178368.000000,107796.000000,96525.000000,519.127028)}
{pt3dadd(178524.000000,107976.000000,96625.000000,509.001332)}
{pt3dadd(178644.000000,108084.000000,96700.000000,499.357820)}
{pt3dadd(178740.000000,108240.000000,96700.000000,499.357820)}
{pt3dadd(178860.000000,108348.000000,96800.000000,484.527968)}
{pt3dadd(178932.000000,108516.000000,96950.000000,471.076858)}
{pt3dadd(179112.000000,108648.000000,97050.000000,449.692002)}
{pt3dadd(179172.000000,108840.000000,97075.000000,445.211856)}
{pt3dadd(179184.000000,109008.000000,97175.000000,455.337552)}
{pt3dadd(179292.000000,109200.000000,97375.000000,442.526968)}
{pt3dadd(179412.000000,109380.000000,97400.000000,434.593222)}
{pt3dadd(179568.000000,109572.000000,97575.000000,455.978078)}
{pt3dadd(179700.000000,109752.000000,97600.000000,443.777524)}
{pt3dadd(179856.000000,109932.000000,97775.000000,433.651828)}
{pt3dadd(179892.000000,110112.000000,97825.000000,472.455832)}
{pt3dadd(180024.000000,110316.000000,97975.000000,498.780044)}
{pt3dadd(180216.000000,110496.000000,98175.000000,485.328934)}
{pt3dadd(180612.000000,110688.000000,98525.000000,489.199050)}
{pt3dadd(180804.000000,110808.000000,98700.000000,475.747940)}
{pt3dadd(180984.000000,110940.000000,98750.000000,429.387992)}
{pt3dadd(181116.000000,111060.000000,98800.000000,389.340524)}
{pt3dadd(181284.000000,111228.000000,98925.000000,402.791634)}
{pt3dadd(181416.000000,111528.000000,99000.000000,402.791634)}
{pt3dadd(181536.000000,111732.000000,99050.000000,402.791634)}
{pt3dadd(181644.000000,111876.000000,99075.000000,395.938166)}
{pt3dadd(181812.000000,112020.000000,99125.000000,402.465278)}
{pt3dadd(181956.000000,112200.000000,99200.000000,370.541126)}
{pt3dadd(181956.000000,112368.000000,99300.000000,362.985182)}
{pt3dadd(182196.000000,112716.000000,99450.000000,355.051436)}
{pt3dadd(182328.000000,113100.000000,99675.000000,369.460848)}
{pt3dadd(182436.000000,113232.000000,99675.000000,376.656992)}
{pt3dadd(182532.000000,113364.000000,99675.000000,399.396842)}
{pt3dadd(182556.000000,113460.000000,99675.000000,411.016416)}
{pt3dadd(182604.000000,113604.000000,99825.000000,418.950162)}
{pt3dadd(182640.000000,113772.000000,100000.000000,418.950162)}
{pt3dadd(182820.000000,113976.000000,100175.000000,408.410866)}
{pt3dadd(182940.000000,114252.000000,100325.000000,392.524484)}
{pt3dadd(183096.000000,114504.000000,100475.000000,374.051442)}
{pt3dadd(183204.000000,114588.000000,100550.000000,369.987812)}
{pt3dadd(183300.000000,114672.000000,100550.000000,358.921552)}
{pt3dadd(183408.000000,114756.000000,100550.000000,362.264704)}
{pt3dadd(183504.000000,114840.000000,100700.000000,362.264704)}
{pt3dadd(183600.000000,114912.000000,100775.000000,365.607856)}
{pt3dadd(183708.000000,114996.000000,100775.000000,361.737740)}
{pt3dadd(183804.000000,115080.000000,100775.000000,376.867630)}
{pt3dadd(183888.000000,115200.000000,100875.000000,391.997520)}
{pt3dadd(183984.000000,115344.000000,101050.000000,403.617094)}
{pt3dadd(184104.000000,115572.000000,101200.000000,414.683354)}
{pt3dadd(184344.000000,115836.000000,101325.000000,414.683354)}
{pt3dadd(184512.000000,116028.000000,101450.000000,396.210312)}
{pt3dadd(184680.000000,116208.000000,101550.000000,381.080422)}
{pt3dadd(184836.000000,116412.000000,101525.000000,365.950532)}
{pt3dadd(185076.000000,116628.000000,101575.000000,354.884272)}
{pt3dadd(185208.000000,116868.000000,101775.000000,332.490312)}
{pt3dadd(185436.000000,117096.000000,101850.000000,320.635648)}
{pt3dadd(185688.000000,117384.000000,102025.000000,314.108536)}
{pt3dadd(185784.000000,117576.000000,102100.000000,310.765384)}
{pt3dadd(185844.000000,117780.000000,102250.000000,310.765384)}
{pt3dadd(185916.000000,117996.000000,102325.000000,337.029460)}
{pt3dadd(186024.000000,118176.000000,102450.000000,352.227276)}
{pt3dadd(186180.000000,118296.000000,102650.000000,355.411236)}
{pt3dadd(186348.000000,118428.000000,102825.000000,352.227276)}
{pt3dadd(186552.000000,118632.000000,102975.000000,342.667820)}
{pt3dadd(186636.000000,118752.000000,102975.000000,322.042104)}
{pt3dadd(186792.000000,118884.000000,103050.000000,315.514992)}
{pt3dadd(186876.000000,119064.000000,103150.000000,306.410748)}
{pt3dadd(186948.000000,119184.000000,103275.000000,300.490464)}
{pt3dadd(187020.000000,119364.000000,103275.000000,297.602524)}
{pt3dadd(187032.000000,119520.000000,103350.000000,294.714584)}
{pt3dadd(187176.000000,119700.000000,103425.000000,283.424430)}
{pt3dadd(187128.000000,119868.000000,103500.000000,286.312370)}
{pt3dadd(187188.000000,120060.000000,103600.000000,292.232654)}
{pt3dadd(187128.000000,120240.000000,103800.000000,301.336898)}
{pt3dadd(187188.000000,120384.000000,103850.000000,313.784294)}
{pt3dadd(187272.000000,120576.000000,103900.000000,328.258408)}
{pt3dadd(187404.000000,120756.000000,104100.000000,328.258408)}
{pt3dadd(187452.000000,120948.000000,104100.000000,338.295836)}
{pt3dadd(187512.000000,121128.000000,104100.000000,345.149304)}
{pt3dadd(187572.000000,121320.000000,104100.000000,345.149304)}
{pt3dadd(187680.000000,121464.000000,104250.000000,348.492456)}
{pt3dadd(187764.000000,121752.000000,104350.000000,358.051912)}
{pt3dadd(187812.000000,121968.000000,104500.000000,351.198444)}
{pt3dadd(187860.000000,122112.000000,104575.000000,351.198444)}
{pt3dadd(187944.000000,122352.000000,104650.000000,351.198444)}
{pt3dadd(188028.000000,122532.000000,104775.000000,354.708760)}
{pt3dadd(188124.000000,122724.000000,104875.000000,358.219076)}
{pt3dadd(188208.000000,122880.000000,104900.000000,365.072544)}
{pt3dadd(188220.000000,123084.000000,104975.000000,368.758372)}
{pt3dadd(188256.000000,123264.000000,105025.000000,375.954516)}
{pt3dadd(188340.000000,123444.000000,105050.000000,365.917088)}
{pt3dadd(188352.000000,123672.000000,105100.000000,355.879660)}
{pt3dadd(188400.000000,123852.000000,105125.000000,327.418668)}
{pt3dadd(188412.000000,124044.000000,105225.000000,313.695412)}
{pt3dadd(188460.000000,124236.000000,105250.000000,291.301452)}
{pt3dadd(188508.000000,124200.000000,105450.000000,297.828564)}
{pt3dadd(188472.000000,124548.000000,105875.000000,307.865992)}
{pt3dadd(188520.000000,124812.000000,106125.000000,336.326984)}
{pt3dadd(188412.000000,125160.000000,106375.000000,346.364412)}
{pt3dadd(188328.000000,125376.000000,106600.000000,358.219076)}
{pt3dadd(188352.000000,125652.000000,106875.000000,358.219076)}
{pt3dadd(188352.000000,125892.000000,107025.000000,342.261364)}
{pt3dadd(188328.000000,126168.000000,107250.000000,329.191592)}
{pt3dadd(188304.000000,126372.000000,107425.000000,319.154164)}
{pt3dadd(188292.000000,126540.000000,107550.000000,310.049920)}
{pt3dadd(188244.000000,126780.000000,107650.000000,303.522808)}
{pt3dadd(188196.000000,127116.000000,107800.000000,309.443092)}
{pt3dadd(188268.000000,127344.000000,107950.000000,312.475436)}
{pt3dadd(188208.000000,127572.000000,108050.000000,322.512864)}
{pt3dadd(188196.000000,127800.000000,108125.000000,338.470576)}
{pt3dadd(188160.000000,128100.000000,108175.000000,344.997688)}
{pt3dadd(188232.000000,128340.000000,108225.000000,358.720944)}
{pt3dadd(188268.000000,128556.000000,108225.000000,376.314316)}
{pt3dadd(188316.000000,128820.000000,108450.000000,372.804000)}
{pt3dadd(188388.000000,128976.000000,108550.000000,372.804000)}
{pt3dadd(188496.000000,129180.000000,108775.000000,363.244544)}
{pt3dadd(188604.000000,129396.000000,109075.000000,349.521288)}
{pt3dadd(188712.000000,129612.000000,109075.000000,353.584918)}
{pt3dadd(188748.000000,129840.000000,109075.000000,353.584918)}
{pt3dadd(188796.000000,130056.000000,109075.000000,361.140862)}
{pt3dadd(188808.000000,130188.000000,109100.000000,381.766578)}
{pt3dadd(189396.000000,129948.000000,109075.000000,388.293690)}
{pt3dadd(189432.000000,130404.000000,109175.000000,348.213124)}
{pt3dadd(189588.000000,130716.000000,109200.000000,325.525228)}
{pt3dadd(189660.000000,131064.000000,109275.000000,279.711642)}
{pt3dadd(189720.000000,131364.000000,109325.000000,237.532598)}
{pt3dadd(189732.000000,131580.000000,109325.000000,202.785272)}
{pt3dadd(189744.000000,131796.000000,109325.000000,198.577836)}
{pt3dadd(189744.000000,132000.000000,109325.000000,192.107620)}
{pt3dadd(189744.000000,132216.000000,109325.000000,193.880570)}
{pt3dadd(189756.000000,132432.000000,109325.000000,190.246028)}
{pt3dadd(189756.000000,132636.000000,109325.000000,202.305458)}
{pt3dadd(189756.000000,132852.000000,109325.000000,206.512894)}
{pt3dadd(189756.000000,133056.000000,109325.000000,232.327854)}
{pt3dadd(189768.000000,133272.000000,109325.000000,284.698928)}
{pt3dadd(189900.000000,133416.000000,109325.000000,304.248438)}
{pt3dadd(190032.000000,133560.000000,109325.000000,323.593182)}
{pt3dadd(190092.000000,133836.000000,109325.000000,333.346042)}
{pt3dadd(190044.000000,134004.000000,109325.000000,321.491378)}
{pt3dadd(190008.000000,134088.000000,109325.000000,298.751528)}
{pt3dadd(189996.000000,134268.000000,109325.000000,317.459660)}
{pt3dadd(190044.000000,134508.000000,109325.000000,293.697108)}
{pt3dadd(189780.000000,134700.000000,109650.000000,291.077658)}
{pt3dadd(189804.000000,134952.000000,109675.000000,285.963492)}
{pt3dadd(189864.000000,135204.000000,109675.000000,289.306644)}
{pt3dadd(190032.000000,135516.000000,109750.000000,305.193026)}
{pt3dadd(189972.000000,135732.000000,109800.000000,351.695428)}
{pt3dadd(189912.000000,135948.000000,109800.000000,373.023010)}
{pt3dadd(189948.000000,136212.000000,109800.000000,380.887596)}
{pt3dadd(189960.000000,136524.000000,109800.000000,363.070330)}
{pt3dadd(189912.000000,136896.000000,110025.000000,325.856366)}
{pt3dadd(189984.000000,137100.000000,110025.000000,296.900212)}
{pt3dadd(190056.000000,137352.000000,110025.000000,266.284192)}
{pt3dadd(190068.000000,137520.000000,110050.000000,266.284192)}
{pt3dadd(190056.000000,137760.000000,110025.000000,266.284192)}
{pt3dadd(190032.000000,138012.000000,110025.000000,261.413562)}
{pt3dadd(190008.000000,138264.000000,110025.000000,243.867314)}
{pt3dadd(189828.000000,138552.000000,110175.000000,246.022342)}
{pt3dadd(189792.000000,138852.000000,110175.000000,227.356954)}
{pt3dadd(189828.000000,139104.000000,110175.000000,214.061436)}
{pt3dadd(189852.000000,139392.000000,110250.000000,216.437350)}
{pt3dadd(189924.000000,139752.000000,110350.000000,223.231072)}
{pt3dadd(190080.000000,140064.000000,110450.000000,219.023636)}
{pt3dadd(190224.000000,140352.000000,110550.000000,220.978308)}
{pt3dadd(190404.000000,140616.000000,110725.000000,222.932980)}
{pt3dadd(190392.000000,140880.000000,110775.000000,218.294286)}
{pt3dadd(190464.000000,141168.000000,110800.000000,209.448156)}
{pt3dadd(190476.000000,141264.000000,110800.000000,207.493484)}
{pt3dadd(190548.000000,141444.000000,110900.000000,211.700920)}
{pt3dadd(190608.000000,141624.000000,110975.000000,218.171136)}
{pt3dadd(190596.000000,141816.000000,110950.000000,216.016108)}
{pt3dadd(190584.000000,141996.000000,110975.000000,216.016108)}
{pt3dadd(190656.000000,142164.000000,111050.000000,222.178216)}
{pt3dadd(190608.000000,142260.000000,111125.000000,222.178216)}
{pt3dadd(190548.000000,142464.000000,111125.000000,217.760408)}
{pt3dadd(190524.000000,142680.000000,111125.000000,219.915436)}
{pt3dadd(190548.000000,142872.000000,111200.000000,224.122872)}
{pt3dadd(190560.000000,143076.000000,111275.000000,239.514092)}
{pt3dadd(190596.000000,143220.000000,111275.000000,244.152786)}
{pt3dadd(190524.000000,143376.000000,111225.000000,253.441224)}
{pt3dadd(190572.000000,143508.000000,111275.000000,260.574634)}
{pt3dadd(190560.000000,143700.000000,111325.000000,267.708044)}
{pt3dadd(190440.000000,143820.000000,111400.000000,262.069684)}
{pt3dadd(190404.000000,143928.000000,111400.000000,279.038514)}
{pt3dadd(190500.000000,144024.000000,111575.000000,284.408384)}
{pt3dadd(190536.000000,144288.000000,111700.000000,289.778254)}
{pt3dadd(190356.000000,144504.000000,111900.000000,301.068408)}
{pt3dadd(190188.000000,144780.000000,112025.000000,303.818828)}
{pt3dadd(190044.000000,145044.000000,112150.000000,282.211304)}
{pt3dadd(190068.000000,145164.000000,112150.000000,263.545916)}
{pt3dadd(189972.000000,145344.000000,112100.000000,246.835200)}
{pt3dadd(189948.000000,145548.000000,112150.000000,222.249528)}
{pt3dadd(189876.000000,145812.000000,112225.000000,199.949598)}
{pt3dadd(189840.000000,146088.000000,112325.000000,191.925898)}
{pt3dadd(189828.000000,146352.000000,112350.000000,193.880570)}
{pt3dadd(189780.000000,146532.000000,112425.000000,191.925898)}
{pt3dadd(189696.000000,146772.000000,112525.000000,193.880570)}
{pt3dadd(189696.000000,146988.000000,112650.000000,205.940000)}
{pt3dadd(189732.000000,147228.000000,112750.000000,213.963700)}
{pt3dadd(189684.000000,147468.000000,112800.000000,227.923996)}
{pt3dadd(189600.000000,147552.000000,112800.000000,241.219514)}
{pt3dadd(189504.000000,147636.000000,112800.000000,257.930230)}
{pt3dadd(189468.000000,147804.000000,112900.000000,257.930230)}
{pt3dadd(189444.000000,147996.000000,112950.000000,260.193010)}
{pt3dadd(189264.000000,148212.000000,113025.000000,252.702930)}
{pt3dadd(189012.000000,148416.000000,113150.000000,241.362084)}
{pt3dadd(188904.000000,148584.000000,113325.000000,226.703776)}
{pt3dadd(188892.000000,148656.000000,113425.000000,224.440996)}
{pt3dadd(188856.000000,148716.000000,113525.000000,216.016108)}
{pt3dadd(188844.000000,148812.000000,113625.000000,209.545892)}
{pt3dadd(188700.000000,148884.000000,113775.000000,211.598300)}
{pt3dadd(188604.000000,148992.000000,113900.000000,213.753328)}
{pt3dadd(188532.000000,149040.000000,114025.000000,218.392022)}
{pt3dadd(188436.000000,149076.000000,114175.000000,237.057410)}
{pt3dadd(188424.000000,149160.000000,114300.000000,269.725838)}
{pt3dadd(188340.000000,149160.000000,114450.000000,296.831542)}
{pt3dadd(188220.000000,149268.000000,114600.000000,336.912108)}
{pt3dadd(188088.000000,149448.000000,114725.000000,368.290350)}
{pt3dadd(188028.000000,149424.000000,114925.000000,380.737746)}
{pt3dadd(187944.000000,149568.000000,115050.000000,373.884278)}
{pt3dadd(187740.000000,149580.000000,115200.000000,377.394594)}
{pt3dadd(187692.000000,149820.000000,115325.000000,373.330964)}
{pt3dadd(187452.000000,149892.000000,115475.000000,362.264704)}
{pt3dadd(187308.000000,150060.000000,115600.000000,358.921552)}
{pt3dadd(187188.000000,150108.000000,115725.000000,355.737592)}
{pt3dadd(187068.000000,150396.000000,115850.000000,348.884124)}
{pt3dadd(186948.000000,150528.000000,115975.000000,334.474712)}
{pt3dadd(186828.000000,150696.000000,116050.000000,334.474712)}
{pt3dadd(186684.000000,150840.000000,116175.000000,334.474712)}
{pt3dadd(186588.000000,151008.000000,116325.000000,341.001824)}
{pt3dadd(186444.000000,151176.000000,116425.000000,347.855292)}
{pt3dadd(186276.000000,151404.000000,116575.000000,358.394588)}
{pt3dadd(186096.000000,151560.000000,116650.000000,369.460848)}
{pt3dadd(185988.000000,151788.000000,116725.000000,383.870260)}
{pt3dadd(185964.000000,151824.000000,116900.000000,403.266958)}
{pt3dadd(185892.000000,151908.000000,117050.000000,414.886532)}
{pt3dadd(185772.000000,152040.000000,117250.000000,418.756648)}
{pt3dadd(185700.000000,152304.000000,117425.000000,404.347236)}
{pt3dadd(185364.000000,152316.000000,117800.000000,378.083160)}
{pt3dadd(185088.000000,152400.000000,118050.000000,340.869196)}
{pt3dadd(184788.000000,152532.000000,118300.000000,298.633602)}
{pt3dadd(184524.000000,152676.000000,118500.000000,264.879446)}
{pt3dadd(184356.000000,152748.000000,118750.000000,268.222598)}
{pt3dadd(184104.000000,152724.000000,119025.000000,283.420414)}
{pt3dadd(183984.000000,152796.000000,119375.000000,280.925698)}
{pt3dadd(182880.000000,152976.000000,120225.000000,292.833586)}
{pt3dadd(181944.000000,153480.000000,120875.000000,297.704216)}
{pt3dadd(181560.000000,153768.000000,121000.000000,288.144760)}
{pt3dadd(180852.000000,154380.000000,121250.000000,284.801608)}
{pt3dadd(180528.000000,154488.000000,121275.000000,305.113590)}
{pt3dadd(180180.000000,154644.000000,121625.000000,331.377666)}
{pt3dadd(179928.000000,154764.000000,121650.000000,352.705248)}
{pt3dadd(179580.000000,154992.000000,121800.000000,355.737592)}
{pt3dadd(179184.000000,155376.000000,122225.000000,359.080744)}
{pt3dadd(178740.000000,155712.000000,122550.000000,370.147004)}
{pt3dadd(178152.000000,156012.000000,122950.000000,349.521288)}
{pt3dadd(177612.000000,156372.000000,123425.000000,339.483860)}
{pt3dadd(176784.000000,156408.000000,123875.000000,328.193706)}
{pt3dadd(176280.000000,156372.000000,124175.000000,318.634250)}
{pt3dadd(175524.000000,156492.000000,124475.000000,282.617314)}
{pt3dadd(175140.000000,156492.000000,124525.000000,325.697126)}
{pt3dadd(174432.000000,156324.000000,124850.000000,319.776842)}
{pt3dadd(173496.000000,156420.000000,125425.000000,319.776842)}
{pt3dadd(172224.000000,156552.000000,125800.000000,329.336298)}
{pt3dadd(171264.000000,156144.000000,126175.000000,369.416864)}
{pt3dadd(170472.000000,156324.000000,126575.000000,346.962768)}
{pt3dadd(170016.000000,156408.000000,127000.000000,356.067012)}
{pt3dadd(169200.000000,156192.000000,127475.000000,367.357166)}
{pt3dadd(168444.000000,156276.000000,127925.000000,340.251462)}
{pt3dadd(167736.000000,156324.000000,128475.000000,321.778420)}
{pt3dadd(166896.000000,156372.000000,128850.000000,304.185048)}
{pt3dadd(165612.000000,156204.000000,129375.000000,301.001088)}
{pt3dadd(164568.000000,155952.000000,130000.000000,307.528200)}
{pt3dadd(163692.000000,155556.000000,130225.000000,305.475792)}
{pt3dadd(162756.000000,155280.000000,130375.000000,308.818944)}
{pt3dadd(161880.000000,155016.000000,130550.000000,326.412316)}
{pt3dadd(160632.000000,154992.000000,130725.000000,344.005688)}
{pt3dadd(159288.000000,155172.000000,131100.000000,355.071948)}
{pt3dadd(158160.000000,155772.000000,131250.000000,387.740376)}
{pt3dadd(157812.000000,156120.000000,131350.000000,398.806636)}
{pt3dadd(157452.000000,156288.000000,131425.000000,398.806636)}
{pt3dadd(157128.000000,156576.000000,131375.000000,407.137074)}
{pt3dadd(156840.000000,156816.000000,131250.000000,419.947658)}
{pt3dadd(156480.000000,156984.000000,131350.000000,455.144038)}
{pt3dadd(156156.000000,157200.000000,131350.000000,482.784474)}
{pt3dadd(155820.000000,157512.000000,131425.000000,486.848104)}
{pt3dadd(155376.000000,157800.000000,131425.000000,470.961722)}
{pt3dadd(154956.000000,158064.000000,131550.000000,458.151138)}
{pt3dadd(154668.000000,158352.000000,131650.000000,458.151138)}
{pt3dadd(154320.000000,158628.000000,132025.000000,495.191958)}
{pt3dadd(154020.000000,158820.000000,132375.000000,529.932332)}
{pt3dadd(153528.000000,158892.000000,132925.000000,570.574354)}
{pt3dadd(153360.000000,158820.000000,133450.000000,621.686198)}
{pt3dadd(152892.000000,158724.000000,133825.000000,632.849766)}
{pt3dadd(152508.000000,158676.000000,134250.000000,590.622606)}
{pt3dadd(152244.000000,158568.000000,134700.000000,560.149040)}
{pt3dadd(151692.000000,158364.000000,135125.000000,560.149040)}
{pt3dadd(151308.000000,158244.000000,135475.000000,513.100826)}
{pt3dadd(151056.000000,158208.000000,135775.000000,482.627260)}
{pt3dadd(150864.000000,158184.000000,136125.000000,472.983748)}
{pt3dadd(150732.000000,158028.000000,136500.000000,482.168050)}
{pt3dadd(150204.000000,158016.000000,136825.000000,461.892556)}
{pt3dadd(149868.000000,157872.000000,137150.000000,470.639510)}
{pt3dadd(149676.000000,157560.000000,137500.000000,470.639510)}
{pt3dadd(149304.000000,157332.000000,137900.000000,461.892556)}
{pt3dadd(149736.000000,156996.000000,138050.000000,502.108888)}
{pt3dadd(149916.000000,156516.000000,138550.000000,547.029376)}
{pt3dadd(149808.000000,156120.000000,138925.000000,556.672888)}
{pt3dadd(149628.000000,155796.000000,139275.000000,565.857190)}
{pt3dadd(149052.000000,155184.000000,139575.000000,561.793560)}
{pt3dadd(148068.000000,154356.000000,139575.000000,516.873072)}
{pt3dadd(146940.000000,153636.000000,139475.000000,492.228078)}
{pt3dadd(145380.000000,153708.000000,139350.000000,492.228078)}
{pt3dadd(143508.000000,153108.000000,139225.000000,487.523922)}
{pt3dadd(142320.000000,153060.000000,139550.000000,500.334506)}
{pt3dadd(141180.000000,152652.000000,139975.000000,505.038662)}
{pt3dadd(140052.000000,152208.000000,140500.000000,484.763168)}
{pt3dadd(139788.000000,152172.000000,140675.000000,489.949508)}
{pt3dadd(139536.000000,152172.000000,140725.000000,489.949508)}
{pt3dadd(139236.000000,152208.000000,141000.000000,489.949508)}
{pt3dadd(138924.000000,152412.000000,141300.000000,505.520846)}
{pt3dadd(138900.000000,152532.000000,141675.000000,515.164358)}
{pt3dadd(138672.000000,152640.000000,142025.000000,515.164358)}
{pt3dadd(138672.000000,152484.000000,142425.000000,515.164358)}
{pt3dadd(138564.000000,152400.000000,142800.000000,494.797830)}
{pt3dadd(138588.000000,152136.000000,143150.000000,461.711752)}
{pt3dadd(138648.000000,151812.000000,143600.000000,478.061660)}
{pt3dadd(138876.000000,151884.000000,144025.000000,483.507302)}
{pt3dadd(138732.000000,152592.000000,144475.000000,503.782796)}
{pt3dadd(138696.000000,153024.000000,144850.000000,533.792836)}
{pt3dadd(138984.000000,153240.000000,145200.000000,556.246932)}
{pt3dadd(139056.000000,153408.000000,145550.000000,534.957668)}
{pt3dadd(138996.000000,153432.000000,146000.000000,514.682174)}
{pt3dadd(138996.000000,153312.000000,146400.000000,499.110836)}
{pt3dadd(138636.000000,153108.000000,146775.000000,504.297176)}
{pt3dadd(138876.000000,152724.000000,147100.000000,494.653664)}
{pt3dadd(138624.000000,152544.000000,147400.000000,499.593020)}
{pt3dadd(138276.000000,151872.000000,147875.000000,531.590266)}
{pt3dadd(138216.000000,151380.000000,147925.000000,547.161604)}
{pt3dadd(138084.000000,150996.000000,148000.000000,570.633012)}
{pt3dadd(137904.000000,150600.000000,148075.000000,585.462864)}
{pt3dadd(137700.000000,150216.000000,148050.000000,580.523508)}
{pt3dadd(137616.000000,149820.000000,148250.000000,558.169774)}
{pt3dadd(137496.000000,149352.000000,148325.000000,552.724132)}
{pt3dadd(137388.000000,148992.000000,148475.000000,529.252724)}
{pt3dadd(137412.000000,148596.000000,148600.000000,552.724132)}
{pt3dadd(137448.000000,148248.000000,148825.000000,580.017222)}
{pt3dadd(137508.000000,147876.000000,148850.000000,585.203562)}
{pt3dadd(137472.000000,147456.000000,149125.000000,637.204630)}
{pt3dadd(137340.000000,146988.000000,149375.000000,674.245450)}
{pt3dadd(137088.000000,146568.000000,149775.000000,645.587702)}
{pt3dadd(136464.000000,146352.000000,149900.000000,628.420308)}
{pt3dadd(136140.000000,146124.000000,150050.000000,623.233968)}
{pt3dadd(135756.000000,146196.000000,150275.000000,556.403048)}
{pt3dadd(135432.000000,146268.000000,150525.000000,514.175888)}
{pt3dadd(135084.000000,146136.000000,150550.000000,524.807870)}
{pt3dadd(134796.000000,146340.000000,151050.000000,541.975264)}
{pt3dadd(134472.000000,146184.000000,151325.000000,570.633012)}
{pt3dadd(134208.000000,146040.000000,151475.000000,621.372167)}
{pt3dadd(133788.000000,145884.000000,151900.000000,661.921800)}

{create adhoc49}
{access adhoc49}
{connect adhoc49(1), adhoc48(0)}
{nseg = 1}
{strdef color color = "White"}
{pt3dclear()}
{pt3dadd(133788.000000,145884.000000,151900.000000,661.921800)}
{pt3dadd(133332.000000,145764.000000,151975.000000,602.289720)}
{pt3dadd(132984.000000,145524.000000,152225.000000,620.453940)}
{pt3dadd(132636.000000,145392.000000,152350.000000,620.453940)}
{pt3dadd(132048.000000,144816.000000,152550.000000,639.381008)}
{pt3dadd(131520.000000,144072.000000,152550.000000,683.985893)}
{pt3dadd(131076.000000,143556.000000,152900.000000,695.017940)}

{create adhoc50}
{access adhoc50}
{connect adhoc50(1), adhoc49(0)}
{nseg = 1}
{strdef color color = "White"}
{pt3dclear()}
{pt3dadd(131076.000000,143556.000000,152900.000000,695.017940)}
{pt3dadd(130752.000000,142800.000000,152875.000000,613.970400)}
{pt3dadd(130356.000000,142248.000000,152900.000000,444.268580)}
{pt3dadd(130296.000000,141912.000000,152750.000000,340.723922)}
{pt3dadd(130056.000000,141684.000000,152450.000000,197.546374)}
{pt3dadd(129924.000000,141384.000000,152125.000000,209.454262)}
{pt3dadd(129852.000000,141216.000000,151825.000000,219.207122)}
{pt3dadd(129852.000000,141084.000000,151525.000000,227.669834)}
{pt3dadd(129684.000000,140976.000000,151150.000000,227.669834)}
{pt3dadd(129672.000000,140880.000000,150850.000000,215.200042)}
{pt3dadd(129432.000000,140436.000000,150550.000000,193.962012)}
{pt3dadd(129288.000000,140232.000000,150175.000000,178.047044)}
{pt3dadd(129000.000000,139800.000000,149850.000000,174.412502)}
{pt3dadd(128688.000000,139140.000000,149400.000000,180.001716)}
{pt3dadd(128520.000000,138492.000000,149050.000000,201.759946)}
{pt3dadd(128520.000000,138156.000000,148875.000000,241.706108)}
{pt3dadd(128532.000000,137748.000000,148700.000000,257.621076)}
{pt3dadd(128916.000000,137316.000000,148625.000000,279.921006)}
{pt3dadd(129012.000000,136932.000000,148550.000000,328.475816)}
{pt3dadd(129216.000000,136488.000000,148475.000000,374.874082)}
{pt3dadd(129660.000000,136020.000000,148300.000000,358.916370)}
{pt3dadd(130032.000000,135564.000000,148550.000000,361.666790)}
{pt3dadd(130176.000000,135168.000000,148525.000000,361.666790)}
{pt3dadd(130596.000000,134832.000000,148425.000000,345.780408)}
{pt3dadd(130848.000000,134448.000000,148350.000000,328.265668)}
{pt3dadd(131268.000000,134136.000000,148225.000000,311.554952)}
{pt3dadd(131856.000000,133488.000000,148050.000000,335.068608)}
{pt3dadd(132432.000000,132972.000000,147925.000000,366.912702)}
{pt3dadd(133092.000000,132276.000000,147875.000000,374.468646)}
{pt3dadd(133512.000000,131748.000000,147550.000000,360.059234)}
{pt3dadd(133812.000000,131856.000000,147950.000000,396.413490)}
{pt3dadd(133836.000000,131748.000000,148300.000000,388.857546)}
{pt3dadd(134664.000000,131580.000000,148600.000000,329.885352)}
{pt3dadd(135000.000000,131304.000000,148875.000000,269.344939)}
{pt3dadd(135072.000000,130956.000000,149225.000000,208.465725)}
{pt3dadd(135180.000000,130536.000000,149550.000000,103.660515)}

{create adhoc51}
{access adhoc51}
{connect adhoc51(1), adhoc49(0)}
{nseg = 1}
{strdef color color = "White"}
{pt3dclear()}
{pt3dadd(131076.000000,143556.000000,152900.000000,695.017940)}
{pt3dadd(130836.000000,142800.000000,153725.000000,665.526590)}
{pt3dadd(130884.000000,142596.000000,154150.000000,615.375530)}
{pt3dadd(130860.000000,142644.000000,154675.000000,544.564760)}

{create adhoc52}
{access adhoc52}
{connect adhoc52(1), adhoc51(0)}
{nseg = 1}
{strdef color color = "White"}
{pt3dclear()}
{pt3dadd(130860.000000,142644.000000,154675.000000,544.564760)}
{pt3dadd(130680.000000,142920.000000,155025.000000,495.505270)}
{pt3dadd(130536.000000,143208.000000,155375.000000,491.552260)}
{pt3dadd(130344.000000,143112.000000,155600.000000,486.365920)}
{pt3dadd(129864.000000,142884.000000,156100.000000,486.365920)}
{pt3dadd(129492.000000,142404.000000,156050.000000,542.716738)}
{pt3dadd(129120.000000,141816.000000,155850.000000,626.340322)}
{pt3dadd(128808.000000,141468.000000,155950.000000,689.501263)}
{pt3dadd(128592.000000,141096.000000,155875.000000,844.798650)}

{create adhoc53}
{access adhoc53}
{connect adhoc53(1), adhoc52(0)}
{nseg = 1}
{strdef color color = "White"}
{pt3dclear()}
{pt3dadd(128592.000000,141096.000000,155875.000000,844.798650)}
{pt3dadd(128484.000000,140580.000000,155950.000000,587.742973)}
{pt3dadd(128292.000000,140040.000000,156000.000000,598.802650)}
{pt3dadd(127980.000000,139668.000000,156175.000000,533.569532)}
{pt3dadd(127812.000000,139272.000000,156175.000000,547.693190)}
{pt3dadd(127548.000000,138816.000000,156500.000000,547.693190)}
{pt3dadd(127344.000000,138552.000000,156600.000000,508.889186)}
{pt3dadd(127044.000000,138252.000000,156550.000000,468.144986)}
{pt3dadd(126792.000000,138000.000000,156600.000000,478.776968)}
{pt3dadd(126672.000000,137724.000000,156675.000000,473.837612)}
{pt3dadd(126276.000000,137436.000000,156750.000000,488.667464)}
{pt3dadd(126048.000000,137160.000000,156750.000000,496.997902)}
{pt3dadd(125808.000000,136884.000000,156775.000000,520.574708)}
{pt3dadd(125436.000000,136452.000000,156950.000000,532.296460)}
{pt3dadd(125004.000000,136440.000000,157100.000000,532.296460)}
{pt3dadd(124704.000000,136596.000000,157300.000000,508.719654)}
{pt3dadd(124332.000000,136488.000000,157425.000000,500.389216)}
{pt3dadd(124020.000000,136476.000000,157550.000000,485.559364)}
{pt3dadd(123756.000000,136404.000000,157600.000000,429.685274)}
{pt3dadd(123420.000000,136248.000000,157725.000000,394.577162)}
{pt3dadd(123120.000000,136272.000000,157800.000000,382.957588)}
{pt3dadd(122820.000000,136200.000000,158050.000000,391.288026)}
{pt3dadd(122556.000000,136044.000000,158300.000000,367.411182)}
{pt3dadd(122316.000000,136008.000000,158425.000000,354.963786)}
{pt3dadd(122028.000000,135912.000000,158550.000000,343.673632)}
{pt3dadd(121512.000000,135768.000000,158675.000000,359.560014)}
{pt3dadd(121068.000000,135708.000000,158750.000000,373.683672)}
{pt3dadd(119904.000000,135564.000000,158975.000000,417.836010)}
{pt3dadd(119052.000000,135288.000000,159125.000000,474.435744)}
{pt3dadd(118656.000000,135168.000000,159450.000000,548.127100)}
{pt3dadd(118416.000000,135060.000000,159300.000000,557.311402)}
{pt3dadd(118152.000000,135096.000000,159625.000000,543.187744)}
{pt3dadd(117864.000000,135192.000000,159775.000000,522.912250)}
{pt3dadd(117612.000000,135336.000000,159925.000000,470.788850)}
{pt3dadd(117300.000000,135264.000000,160175.000000,470.415500)}

{create adhoc54}
{access adhoc54}
{connect adhoc54(1), adhoc53(0)}
{nseg = 1}
{strdef color color = "White"}
{pt3dclear()}
{pt3dadd(117300.000000,135264.000000,160175.000000,470.415500)}
{pt3dadd(117120.000000,135360.000000,160300.000000,479.021110)}
{pt3dadd(116796.000000,135360.000000,160375.000000,427.992342)}
{pt3dadd(116508.000000,135216.000000,160300.000000,391.668102)}
{pt3dadd(116244.000000,135228.000000,160425.000000,348.588290)}
{pt3dadd(115980.000000,135216.000000,160300.000000,319.632136)}
{pt3dadd(115716.000000,135300.000000,160175.000000,331.251710)}
{pt3dadd(115464.000000,135396.000000,160025.000000,345.661122)}
{pt3dadd(115188.000000,135408.000000,159875.000000,369.174778)}
{pt3dadd(114924.000000,135372.000000,159625.000000,389.800494)}
{pt3dadd(114660.000000,135336.000000,159625.000000,423.236794)}
{pt3dadd(114372.000000,135264.000000,159575.000000,419.173164)}
{pt3dadd(114132.000000,135204.000000,159500.000000,415.303048)}
{pt3dadd(113844.000000,135192.000000,159400.000000,404.236788)}
{pt3dadd(113592.000000,135060.000000,159425.000000,393.170528)}
{pt3dadd(113352.000000,134820.000000,159450.000000,362.766572)}
{pt3dadd(113004.000000,134592.000000,159625.000000,339.252916)}
{pt3dadd(112704.000000,134436.000000,159675.000000,325.529660)}
{pt3dadd(112428.000000,134400.000000,159725.000000,325.529660)}
{pt3dadd(112116.000000,134220.000000,159875.000000,344.926358)}
{pt3dadd(111828.000000,134160.000000,159900.000000,375.330314)}
{pt3dadd(111504.000000,133896.000000,160025.000000,411.654554)}
{pt3dadd(111216.000000,133908.000000,160150.000000,456.888362)}
{pt3dadd(110892.000000,133788.000000,160225.000000,512.762452)}
{pt3dadd(110604.000000,133704.000000,160425.000000,548.460663)}
{pt3dadd(110304.000000,133356.000000,160400.000000,630.401730)}

{create adhoc55}
{access adhoc55}
{connect adhoc55(1), adhoc54(0)}
{nseg = 1}
{strdef color color = "White"}
{pt3dclear()}
{pt3dadd(110304.000000,133356.000000,160400.000000,630.401730)}
{pt3dadd(110256.000000,132552.000000,160575.000000,300.754160)}
{pt3dadd(110364.000000,131568.000000,160750.000000,305.667192)}
{pt3dadd(110484.000000,130860.000000,161000.000000,240.233646)}
{pt3dadd(110688.000000,130272.000000,161250.000000,260.955770)}
{pt3dadd(110736.000000,130032.000000,161200.000000,272.987650)}
{pt3dadd(110880.000000,129732.000000,161375.000000,245.762210)}
{pt3dadd(110724.000000,129468.000000,161375.000000,203.338954)}
{pt3dadd(110784.000000,129204.000000,161525.000000,174.854450)}
{pt3dadd(111060.000000,128964.000000,161600.000000,154.132326)}
{pt3dadd(111504.000000,128712.000000,161650.000000,206.503400)}
{pt3dadd(111636.000000,128484.000000,161700.000000,293.078994)}
{pt3dadd(112212.000000,128184.000000,162325.000000,385.372514)}
{pt3dadd(112596.000000,127848.000000,162425.000000,540.063447)}
{pt3dadd(112728.000000,127476.000000,162475.000000,600.382600)}

{create adhoc56}
{access adhoc56}
{connect adhoc56(1), adhoc55(0)}
{nseg = 1}
{strdef color color = "White"}
{pt3dclear()}
{pt3dadd(112728.000000,127476.000000,162475.000000,600.382600)}
{pt3dadd(113652.000000,127476.000000,162425.000000,298.411550)}
{pt3dadd(114492.000000,127320.000000,162200.000000,231.966930)}
{pt3dadd(114720.000000,127344.000000,162150.000000,138.350410)}
{pt3dadd(114936.000000,127320.000000,162175.000000,131.040000)}
{pt3dadd(115176.000000,127260.000000,162200.000000,132.300000)}
{pt3dadd(115488.000000,127260.000000,162150.000000,143.071880)}
{pt3dadd(115788.000000,127284.000000,162175.000000,186.818136)}
{pt3dadd(116136.000000,127200.000000,162200.000000,227.221240)}
{pt3dadd(116472.000000,127224.000000,162375.000000,290.502067)}
{pt3dadd(116640.000000,127296.000000,162475.000000,334.315520)}

{create adhoc57}
{access adhoc57}
{connect adhoc57(1), adhoc56(0)}
{nseg = 1}
{strdef color color = "White"}
{pt3dclear()}
{pt3dadd(116640.000000,127296.000000,162475.000000,334.315520)}
{pt3dadd(116904.000000,127224.000000,162800.000000,424.897117)}
{pt3dadd(117384.000000,127080.000000,163050.000000,416.240212)}
{pt3dadd(117468.000000,127152.000000,163400.000000,392.477660)}
{pt3dadd(117444.000000,127908.000000,163525.000000,340.670823)}
{pt3dadd(117492.000000,128040.000000,163875.000000,215.502760)}

{create adhoc58}
{access adhoc58}
{connect adhoc58(1), adhoc56(0)}
{nseg = 1}
{strdef color color = "White"}
{pt3dclear()}
{pt3dadd(116640.000000,127296.000000,162475.000000,334.315520)}
{pt3dadd(117204.000000,126660.000000,162825.000000,282.919710)}
{pt3dadd(117216.000000,126060.000000,162775.000000,273.728492)}
{pt3dadd(117312.000000,125784.000000,162875.000000,221.914693)}
{pt3dadd(117360.000000,125652.000000,162425.000000,168.852050)}

{create adhoc59}
{access adhoc59}
{connect adhoc59(1), adhoc55(0)}
{nseg = 1}
{strdef color color = "White"}
{pt3dclear()}
{pt3dadd(112728.000000,127476.000000,162475.000000,600.382600)}
{pt3dadd(112368.000000,127128.000000,162775.000000,554.526807)}
{pt3dadd(112344.000000,126828.000000,162925.000000,442.015812)}
{pt3dadd(112500.000000,126492.000000,162825.000000,345.939292)}
{pt3dadd(112548.000000,126132.000000,162750.000000,222.166213)}
{pt3dadd(112512.000000,125724.000000,162700.000000,120.000000)}

{create adhoc60}
{access adhoc60}
{connect adhoc60(1), adhoc54(0)}
{nseg = 1}
{strdef color color = "White"}
{pt3dclear()}
{pt3dadd(110304.000000,133356.000000,160400.000000,630.401730)}
{pt3dadd(110040.000000,133920.000000,160400.000000,539.816763)}
{pt3dadd(109692.000000,133992.000000,160525.000000,424.749470)}
{pt3dadd(109356.000000,133980.000000,160350.000000,351.058114)}
{pt3dadd(109080.000000,133956.000000,160275.000000,332.667648)}
{pt3dadd(108756.000000,133848.000000,160150.000000,328.187502)}
{pt3dadd(108468.000000,133872.000000,160150.000000,355.764788)}
{pt3dadd(108144.000000,133812.000000,160125.000000,433.792077)}
{pt3dadd(107820.000000,133788.000000,160075.000000,426.680730)}

{create adhoc61}
{access adhoc61}
{connect adhoc61(1), adhoc60(0)}
{nseg = 1}
{strdef color color = "White"}
{pt3dclear()}
{pt3dadd(107820.000000,133788.000000,160075.000000,426.680730)}
{pt3dadd(107472.000000,133536.000000,160050.000000,413.457820)}
{pt3dadd(107184.000000,133116.000000,159950.000000,399.193664)}
{pt3dadd(106872.000000,132912.000000,159575.000000,374.504318)}
{pt3dadd(106368.000000,132612.000000,159350.000000,349.814972)}
{pt3dadd(105960.000000,132600.000000,159325.000000,317.668152)}
{pt3dadd(105504.000000,132336.000000,159225.000000,281.313896)}
{pt3dadd(105192.000000,132180.000000,159200.000000,241.367734)}
{pt3dadd(104868.000000,131952.000000,159225.000000,238.479794)}
{pt3dadd(104592.000000,131736.000000,159100.000000,248.039250)}
{pt3dadd(104196.000000,131592.000000,158925.000000,257.792110)}
{pt3dadd(103572.000000,131088.000000,158800.000000,266.638240)}
{pt3dadd(102900.000000,130668.000000,158750.000000,270.099710)}
{pt3dadd(102420.000000,130620.000000,158650.000000,253.388994)}
{pt3dadd(101544.000000,130200.000000,158550.000000,243.829538)}
{pt3dadd(101184.000000,130032.000000,158375.000000,249.467898)}
{pt3dadd(100860.000000,129612.000000,158275.000000,303.300236)}
{pt3dadd(100584.000000,129588.000000,158125.000000,339.784928)}
{pt3dadd(100308.000000,129492.000000,158175.000000,353.745224)}
{pt3dadd(99168.000000,129060.000000,158000.000000,336.198976)}
{pt3dadd(98904.000000,129120.000000,157950.000000,312.784056)}
{pt3dadd(98616.000000,128988.000000,157900.000000,248.150916)}
{pt3dadd(98256.000000,128928.000000,157975.000000,215.482488)}
{pt3dadd(97980.000000,128868.000000,158050.000000,207.992408)}
{pt3dadd(97680.000000,128892.000000,158050.000000,212.410216)}
{pt3dadd(97380.000000,128748.000000,158050.000000,220.433916)}
{pt3dadd(97116.000000,128592.000000,157950.000000,218.572324)}
{pt3dadd(96852.000000,128436.000000,157875.000000,244.387284)}
{pt3dadd(96588.000000,128460.000000,157775.000000,239.969476)}
{pt3dadd(96276.000000,128412.000000,157725.000000,233.499260)}
{pt3dadd(95904.000000,128280.000000,157750.000000,227.337152)}
{pt3dadd(95604.000000,128100.000000,157800.000000,233.205824)}
{pt3dadd(95328.000000,128088.000000,157825.000000,200.113130)}
{pt3dadd(95112.000000,128052.000000,157875.000000,198.060722)}
{pt3dadd(94872.000000,128040.000000,157975.000000,190.782988)}
{pt3dadd(94608.000000,127992.000000,158025.000000,182.320276)}
{pt3dadd(94332.000000,127944.000000,157975.000000,176.451604)}
{pt3dadd(94044.000000,127896.000000,157975.000000,181.774666)}
{pt3dadd(93756.000000,127872.000000,158050.000000,198.485382)}
{pt3dadd(93540.000000,127944.000000,158075.000000,225.361772)}
{pt3dadd(93240.000000,127848.000000,158125.000000,247.120002)}
{pt3dadd(92916.000000,127848.000000,158125.000000,255.143702)}
{pt3dadd(92628.000000,127860.000000,158150.000000,268.439220)}
{pt3dadd(92364.000000,127848.000000,158200.000000,251.728504)}
{pt3dadd(92136.000000,127908.000000,158200.000000,228.313584)}
{pt3dadd(91836.000000,127776.000000,158250.000000,219.025146)}
{pt3dadd(91620.000000,127764.000000,158225.000000,207.539976)}
{pt3dadd(91356.000000,127800.000000,158250.000000,202.669346)}
{pt3dadd(91092.000000,127944.000000,158300.000000,211.515476)}
{pt3dadd(90672.000000,127896.000000,158200.000000,217.384148)}
{pt3dadd(90336.000000,127944.000000,158150.000000,204.914356)}
{pt3dadd(89988.000000,128232.000000,158000.000000,206.602876)}
{pt3dadd(89604.000000,128364.000000,158125.000000,211.473506)}
{pt3dadd(89280.000000,128388.000000,158150.000000,216.587672)}
{pt3dadd(88944.000000,128292.000000,158175.000000,228.495560)}
{pt3dadd(88596.000000,128220.000000,158125.000000,250.253790)}
{pt3dadd(88344.000000,128196.000000,158150.000000,255.843004)}
{pt3dadd(88020.000000,128016.000000,158175.000000,248.709594)}
{pt3dadd(87744.000000,127980.000000,158325.000000,271.103554)}
{pt3dadd(87420.000000,127860.000000,158375.000000,301.431260)}
{pt3dadd(87036.000000,127896.000000,158475.000000,330.314786)}
{pt3dadd(86568.000000,127572.000000,158625.000000,406.685103)}
{pt3dadd(86184.000000,127260.000000,158900.000000,406.362580)}

{create adhoc62}
{access adhoc62}
{connect adhoc62(1), adhoc60(0)}
{nseg = 1}
{strdef color color = "White"}
{pt3dclear()}
{pt3dadd(107820.000000,133788.000000,160075.000000,426.680730)}
{pt3dadd(107820.000000,134220.000000,159825.000000,285.825910)}
{pt3dadd(107568.000000,134820.000000,159375.000000,168.852050)}

{create adhoc63}
{access adhoc63}
{connect adhoc63(1), adhoc53(0)}
{nseg = 1}
{strdef color color = "White"}
{pt3dclear()}
{pt3dadd(117300.000000,135264.000000,160175.000000,470.415500)}
{pt3dadd(116712.000000,135384.000000,160550.000000,348.543377)}
{pt3dadd(117132.000000,135288.000000,160875.000000,275.058732)}
{pt3dadd(117228.000000,135552.000000,161250.000000,208.758632)}
{pt3dadd(117312.000000,135888.000000,161550.000000,161.256526)}
{pt3dadd(117384.000000,135924.000000,161850.000000,159.648412)}
{pt3dadd(117420.000000,135972.000000,162150.000000,173.396362)}
{pt3dadd(117528.000000,136008.000000,162475.000000,188.752426)}
{pt3dadd(117996.000000,135780.000000,162875.000000,246.305572)}
{pt3dadd(118152.000000,135816.000000,163275.000000,306.618262)}
{pt3dadd(118476.000000,136092.000000,163675.000000,383.368918)}
{pt3dadd(118656.000000,136416.000000,164025.000000,378.951110)}
{pt3dadd(118908.000000,136656.000000,164350.000000,360.604900)}
{pt3dadd(118836.000000,136884.000000,164650.000000,310.727684)}
{pt3dadd(119184.000000,137136.000000,165075.000000,252.103514)}
{pt3dadd(119316.000000,137280.000000,165350.000000,180.422442)}
{pt3dadd(119796.000000,137592.000000,165725.000000,176.415362)}
{pt3dadd(120312.000000,137652.000000,165975.000000,217.449468)}
{pt3dadd(120516.000000,137580.000000,166375.000000,267.326684)}
{pt3dadd(120516.000000,136944.000000,166700.000000,309.270154)}
{pt3dadd(120768.000000,137256.000000,167075.000000,353.310790)}
{pt3dadd(121020.000000,137664.000000,167425.000000,387.933890)}
{pt3dadd(121236.000000,137844.000000,167700.000000,375.486494)}
{pt3dadd(121020.000000,138036.000000,168050.000000,323.920758)}
{pt3dadd(121128.000000,138204.000000,168300.000000,280.288768)}
{pt3dadd(121344.000000,138084.000000,168600.000000,232.786662)}
{pt3dadd(121476.000000,138024.000000,168925.000000,192.840500)}
{pt3dadd(121476.000000,137928.000000,169300.000000,208.798212)}
{pt3dadd(121500.000000,137964.000000,169600.000000,260.363948)}
{pt3dadd(121596.000000,137616.000000,170100.000000,296.799794)}
{pt3dadd(121512.000000,137544.000000,170475.000000,308.284964)}
{pt3dadd(121476.000000,137388.000000,170775.000000,326.903544)}
{pt3dadd(121572.000000,137304.000000,171025.000000,326.903544)}
{pt3dadd(121668.000000,137196.000000,171250.000000,285.601903)}
{pt3dadd(121776.000000,136536.000000,171250.000000,368.582860)}

{create adhoc64}
{access adhoc64}
{connect adhoc64(1), adhoc63(0)}
{nseg = 1}
{strdef color color = "White"}
{pt3dclear()}
{pt3dadd(121776.000000,136536.000000,171250.000000,368.582860)}
{pt3dadd(121824.000000,136092.000000,171500.000000,387.319147)}
{pt3dadd(121644.000000,135792.000000,171800.000000,387.196288)}
{pt3dadd(120900.000000,135252.000000,172175.000000,374.126516)}
{pt3dadd(120756.000000,135000.000000,172550.000000,309.098145)}
{pt3dadd(120924.000000,134700.000000,172825.000000,249.604914)}
{pt3dadd(121272.000000,134376.000000,172825.000000,189.258866)}
{pt3dadd(121884.000000,133776.000000,173050.000000,132.588569)}
{pt3dadd(122076.000000,133440.000000,173125.000000,99.724769)}
{pt3dadd(122088.000000,133092.000000,173225.000000,117.251034)}
{pt3dadd(122064.000000,132840.000000,173200.000000,159.988665)}
{pt3dadd(121956.000000,132600.000000,173225.000000,209.795417)}
{pt3dadd(121992.000000,132276.000000,173275.000000,389.063314)}
{pt3dadd(122112.000000,131844.000000,173300.000000,507.234086)}
{pt3dadd(122196.000000,131532.000000,173300.000000,688.028127)}
{pt3dadd(122160.000000,131244.000000,173225.000000,729.768860)}

{create adhoc65}
{access adhoc65}
{connect adhoc65(1), adhoc63(0)}
{nseg = 1}
{strdef color color = "White"}
{pt3dclear()}
{pt3dadd(121776.000000,136536.000000,171250.000000,368.582860)}
{pt3dadd(121764.000000,137424.000000,171450.000000,211.987662)}
{pt3dadd(121836.000000,137664.000000,171725.000000,155.390923)}
{pt3dadd(121692.000000,137808.000000,172050.000000,108.134351)}
{pt3dadd(121656.000000,137796.000000,172375.000000,91.097210)}
{pt3dadd(121536.000000,137940.000000,172700.000000,132.300000)}

{create adhoc66}
{access adhoc66}
{connect adhoc66(1), adhoc52(0)}
{nseg = 1}
{strdef color color = "White"}
{pt3dclear()}
{pt3dadd(128592.000000,141096.000000,155875.000000,844.798650)}
{pt3dadd(127992.000000,141084.000000,155675.000000,409.717820)}
{pt3dadd(127524.000000,141264.000000,155625.000000,325.972308)}
{pt3dadd(127044.000000,141516.000000,155550.000000,189.174874)}
{pt3dadd(126444.000000,141852.000000,155700.000000,179.844732)}
{pt3dadd(126156.000000,141900.000000,155750.000000,173.857322)}
{pt3dadd(125880.000000,141864.000000,155700.000000,166.926146)}
{pt3dadd(125568.000000,141936.000000,155800.000000,166.926146)}
{pt3dadd(125232.000000,141960.000000,155725.000000,192.522710)}
{pt3dadd(124884.000000,141972.000000,155750.000000,211.141290)}
{pt3dadd(124608.000000,142032.000000,155750.000000,238.366730)}
{pt3dadd(124260.000000,142056.000000,155750.000000,261.212874)}
{pt3dadd(123924.000000,142188.000000,155800.000000,283.843874)}
{pt3dadd(123600.000000,142248.000000,155775.000000,258.247310)}
{pt3dadd(123252.000000,142356.000000,155800.000000,235.030470)}
{pt3dadd(123084.000000,142668.000000,156325.000000,207.805030)}
{pt3dadd(123060.000000,143160.000000,156625.000000,181.968740)}
{pt3dadd(123120.000000,143568.000000,157125.000000,142.289596)}
{pt3dadd(123144.000000,144216.000000,157500.000000,142.289596)}
{pt3dadd(123084.000000,144660.000000,157800.000000,168.125886)}
{pt3dadd(123144.000000,145284.000000,158075.000000,214.059458)}
{pt3dadd(123120.000000,145656.000000,158425.000000,245.534108)}
{pt3dadd(122796.000000,145980.000000,158775.000000,256.993038)}
{pt3dadd(122328.000000,146352.000000,159175.000000,262.062622)}
{pt3dadd(122076.000000,146796.000000,159475.000000,236.226332)}
{pt3dadd(121908.000000,147144.000000,159750.000000,212.404034)}
{pt3dadd(121704.000000,147408.000000,159975.000000,245.840334)}
{pt3dadd(121668.000000,147444.000000,160475.000000,284.097976)}
{pt3dadd(121848.000000,147312.000000,160900.000000,310.545240)}
{pt3dadd(121980.000000,147312.000000,161350.000000,322.421234)}
{pt3dadd(122088.000000,147456.000000,161750.000000,303.157720)}
{pt3dadd(122340.000000,147708.000000,162000.000000,246.306500)}
{pt3dadd(122424.000000,147972.000000,162125.000000,199.049928)}
{pt3dadd(122472.000000,148248.000000,162425.000000,164.542934)}
{pt3dadd(122568.000000,148284.000000,162825.000000,149.954790)}
{pt3dadd(122808.000000,148572.000000,163200.000000,149.954790)}
{pt3dadd(122820.000000,149112.000000,163600.000000,160.241270)}
{pt3dadd(122808.000000,149736.000000,163925.000000,227.864370)}
{pt3dadd(122520.000000,150444.000000,164175.000000,276.094620)}
{pt3dadd(122352.000000,150852.000000,164575.000000,304.643060)}
{pt3dadd(122424.000000,151008.000000,164975.000000,315.060444)}
{pt3dadd(122556.000000,151044.000000,165225.000000,310.642636)}
{pt3dadd(122652.000000,151284.000000,165550.000000,257.607680)}
{pt3dadd(122988.000000,151320.000000,165925.000000,243.884424)}
{pt3dadd(123444.000000,151380.000000,166275.000000,246.379733)}
{pt3dadd(123672.000000,150984.000000,166750.000000,318.395720)}

{create adhoc67}
{access adhoc67}
{connect adhoc67(1), adhoc66(0)}
{nseg = 1}
{strdef color color = "White"}
{pt3dclear()}
{pt3dadd(123672.000000,150984.000000,166750.000000,318.395720)}
{pt3dadd(123804.000000,150900.000000,167075.000000,364.447053)}
{pt3dadd(124284.000000,150792.000000,167675.000000,368.582860)}

{create adhoc68}
{access adhoc68}
{connect adhoc68(1), adhoc66(0)}
{nseg = 1}
{strdef color color = "White"}
{pt3dclear()}
{pt3dadd(123672.000000,150984.000000,166750.000000,318.395720)}
{pt3dadd(123768.000000,152004.000000,167025.000000,316.772390)}
{pt3dadd(124104.000000,152820.000000,167250.000000,264.615836)}
{pt3dadd(124488.000000,153252.000000,167500.000000,234.707102)}
{pt3dadd(125040.000000,153612.000000,167825.000000,180.538020)}
{pt3dadd(125364.000000,153948.000000,168150.000000,168.852050)}

{create adhoc69}
{access adhoc69}
{connect adhoc69(1), adhoc51(0)}
{nseg = 1}
{strdef color color = "White"}
{pt3dclear()}
{pt3dadd(130860.000000,142644.000000,154675.000000,544.564760)}
{pt3dadd(131808.000000,141888.000000,154100.000000,442.298350)}
{pt3dadd(132504.000000,141312.000000,154125.000000,314.620034)}
{pt3dadd(133080.000000,140904.000000,154125.000000,233.490082)}
{pt3dadd(133524.000000,140664.000000,154125.000000,170.347128)}
{pt3dadd(133992.000000,140448.000000,154125.000000,116.189357)}
{pt3dadd(134496.000000,140268.000000,154175.000000,132.300000)}

{create adhoc70}
{access adhoc70}
{connect adhoc70(1), adhoc48(0)}
{nseg = 1}
{strdef color color = "White"}
{pt3dclear()}
{pt3dadd(133788.000000,145884.000000,151900.000000,661.921800)}
{pt3dadd(133464.000000,145776.000000,153025.000000,341.791950)}
{pt3dadd(133800.000000,146004.000000,153500.000000,260.707320)}
{pt3dadd(134076.000000,146076.000000,153725.000000,156.105960)}
{pt3dadd(134352.000000,146160.000000,153950.000000,148.046230)}
{pt3dadd(134676.000000,146232.000000,153975.000000,141.759450)}
{pt3dadd(135036.000000,146412.000000,154050.000000,149.069860)}
{pt3dadd(135348.000000,146544.000000,154250.000000,158.991182)}
{pt3dadd(135600.000000,146712.000000,154400.000000,163.370478)}
{pt3dadd(135900.000000,146880.000000,154500.000000,164.829088)}
{pt3dadd(136056.000000,147300.000000,154850.000000,171.115868)}
{pt3dadd(136260.000000,147588.000000,155225.000000,174.577338)}
{pt3dadd(136416.000000,147528.000000,155500.000000,187.872856)}
{pt3dadd(136608.000000,147612.000000,155875.000000,194.804032)}
{pt3dadd(136788.000000,147696.000000,156225.000000,197.943682)}
{pt3dadd(136932.000000,147900.000000,156625.000000,212.379026)}
{pt3dadd(137112.000000,147828.000000,156975.000000,289.505740)}
{pt3dadd(137316.000000,148020.000000,157350.000000,330.038797)}
{pt3dadd(137352.000000,148140.000000,157650.000000,571.792970)}

{create adhoc71}
{access adhoc71}
{connect adhoc71(1), adhoc70(0)}
{nseg = 1}
{strdef color color = "White"}
{pt3dclear()}
{pt3dadd(137352.000000,148140.000000,157650.000000,571.792970)}
{pt3dadd(137376.000000,147900.000000,157925.000000,398.798923)}
{pt3dadd(137652.000000,148500.000000,158400.000000,237.591800)}

{create adhoc72}
{access adhoc72}
{connect adhoc72(1), adhoc71(0)}
{nseg = 1}
{strdef color color = "White"}
{pt3dclear()}
{pt3dadd(137652.000000,148500.000000,158400.000000,237.591800)}
{pt3dadd(136932.000000,149364.000000,159025.000000,185.350400)}
{pt3dadd(137280.000000,149892.000000,159250.000000,228.934856)}
{pt3dadd(137508.000000,150444.000000,159475.000000,258.260827)}
{pt3dadd(137244.000000,151320.000000,159625.000000,351.031280)}

{create adhoc73}
{access adhoc73}
{connect adhoc73(1), adhoc72(0)}
{nseg = 1}
{strdef color color = "White"}
{pt3dclear()}
{pt3dadd(137244.000000,151320.000000,159625.000000,351.031280)}
{pt3dadd(137184.000000,151200.000000,160000.000000,221.752780)}
{pt3dadd(137304.000000,151536.000000,160325.000000,213.384100)}
{pt3dadd(137196.000000,151608.000000,160700.000000,224.450360)}
{pt3dadd(137136.000000,151620.000000,161100.000000,270.952762)}
{pt3dadd(137160.000000,151908.000000,161375.000000,345.291002)}
{pt3dadd(137256.000000,152244.000000,161750.000000,372.396706)}
{pt3dadd(137328.000000,152412.000000,162050.000000,395.811626)}
{pt3dadd(137460.000000,152556.000000,162400.000000,345.169870)}
{pt3dadd(137580.000000,152388.000000,162700.000000,287.729212)}
{pt3dadd(137748.000000,152232.000000,163000.000000,214.378215)}
{pt3dadd(137808.000000,152184.000000,163350.000000,176.334255)}
{pt3dadd(137784.000000,152148.000000,163650.000000,146.318215)}
{pt3dadd(137844.000000,152124.000000,164025.000000,152.919335)}
{pt3dadd(137520.000000,151992.000000,164300.000000,154.527449)}
{pt3dadd(137076.000000,152208.000000,164700.000000,179.050926)}
{pt3dadd(136884.000000,152568.000000,165000.000000,204.647490)}
{pt3dadd(136824.000000,152784.000000,165275.000000,234.663530)}
{pt3dadd(136932.000000,153168.000000,165325.000000,249.820640)}
{pt3dadd(137028.000000,153492.000000,165300.000000,246.680990)}
{pt3dadd(137208.000000,153804.000000,165325.000000,219.334579)}
{pt3dadd(137472.000000,154092.000000,165575.000000,193.738015)}
{pt3dadd(137496.000000,154404.000000,165475.000000,160.874215)}
{pt3dadd(137520.000000,154716.000000,165525.000000,129.217328)}
{pt3dadd(137676.000000,155124.000000,165525.000000,129.217328)}
{pt3dadd(137568.000000,155520.000000,165450.000000,166.316599)}
{pt3dadd(137544.000000,155892.000000,165300.000000,211.556703)}
{pt3dadd(137580.000000,156192.000000,165225.000000,273.376657)}
{pt3dadd(137676.000000,156468.000000,165250.000000,322.850810)}
{pt3dadd(137652.000000,156756.000000,165400.000000,355.899194)}
{pt3dadd(137616.000000,157044.000000,165500.000000,361.537554)}
{pt3dadd(137964.000000,157404.000000,165500.000000,341.894014)}
{pt3dadd(138204.000000,157692.000000,165600.000000,326.007632)}
{pt3dadd(138204.000000,158004.000000,165650.000000,329.517948)}
{pt3dadd(138180.000000,158328.000000,165650.000000,306.886948)}
{pt3dadd(138552.000000,158472.000000,165850.000000,314.135480)}
{pt3dadd(138432.000000,158304.000000,166075.000000,205.240720)}

{create adhoc74}
{access adhoc74}
{connect adhoc74(1), adhoc72(0)}
{nseg = 1}
{strdef color color = "White"}
{pt3dclear()}
{pt3dadd(137244.000000,151320.000000,159625.000000,351.031280)}
{pt3dadd(137076.000000,151920.000000,159650.000000,311.170213)}
{pt3dadd(136632.000000,152268.000000,159275.000000,387.012000)}

{create adhoc75}
{access adhoc75}
{connect adhoc75(1), adhoc74(0)}
{nseg = 1}
{strdef color color = "White"}
{pt3dclear()}
{pt3dadd(136632.000000,152268.000000,159275.000000,387.012000)}
{pt3dadd(136092.000000,153072.000000,159600.000000,333.284043)}
{pt3dadd(135648.000000,153696.000000,159900.000000,351.089398)}
{pt3dadd(134952.000000,154020.000000,160675.000000,316.787550)}
{pt3dadd(134724.000000,154392.000000,161150.000000,327.074030)}
{pt3dadd(134640.000000,153420.000000,159900.000000,273.900180)}
{pt3dadd(134460.000000,152820.000000,159700.000000,204.635347)}
{pt3dadd(134460.000000,152388.000000,159425.000000,160.811480)}

{create adhoc76}
{access adhoc76}
{connect adhoc76(1), adhoc74(0)}
{nseg = 1}
{strdef color color = "White"}
{pt3dclear()}
{pt3dadd(136632.000000,152268.000000,159275.000000,387.012000)}
{pt3dadd(136404.000000,152676.000000,159000.000000,347.092427)}
{pt3dadd(137580.000000,152592.000000,158600.000000,318.219112)}
{pt3dadd(137820.000000,152352.000000,158225.000000,300.283187)}
{pt3dadd(138048.000000,152292.000000,157850.000000,215.502760)}

{create adhoc77}
{access adhoc77}
{connect adhoc77(1), adhoc71(0)}
{nseg = 1}
{strdef color color = "White"}
{pt3dclear()}
{pt3dadd(137652.000000,148500.000000,158400.000000,237.591800)}
{pt3dadd(138024.000000,148812.000000,158275.000000,260.558963)}
{pt3dadd(138444.000000,149076.000000,158275.000000,209.788950)}
{pt3dadd(138720.000000,149436.000000,158275.000000,85.281760)}

{create adhoc78}
{access adhoc78}
{connect adhoc78(1), adhoc70(0)}
{nseg = 1}
{strdef color color = "White"}
{pt3dclear()}
{pt3dadd(137352.000000,148140.000000,157650.000000,571.792970)}
{pt3dadd(137208.000000,147528.000000,157700.000000,330.898640)}
{pt3dadd(137136.000000,146856.000000,157800.000000,244.471287)}
{pt3dadd(137124.000000,146292.000000,157900.000000,151.881401)}
{pt3dadd(137256.000000,145416.000000,158075.000000,118.641669)}
{pt3dadd(137244.000000,144888.000000,158300.000000,114.562360)}
{pt3dadd(137244.000000,144612.000000,158475.000000,108.843540)}

{create adhoc79}
{access adhoc79}
{connect adhoc79(1), adhoc47(0)}
{nseg = 1}
{strdef color color = "White"}
{pt3dclear()}
{pt3dadd(176700.000000,102240.000000,91825.000000,766.257260)}
{pt3dadd(176892.000000,102528.000000,91575.000000,754.094460)}
{pt3dadd(177060.000000,102600.000000,91500.000000,547.447416)}
{pt3dadd(177216.000000,102624.000000,91350.000000,437.296516)}
{pt3dadd(177396.000000,102732.000000,91250.000000,336.598324)}
{pt3dadd(177480.000000,102780.000000,91200.000000,218.805802)}
{pt3dadd(177552.000000,102828.000000,91200.000000,200.140414)}
{pt3dadd(177624.000000,102864.000000,91200.000000,200.140414)}
{pt3dadd(177684.000000,102912.000000,91200.000000,202.295442)}
{pt3dadd(177744.000000,102948.000000,91200.000000,206.934136)}
{pt3dadd(177792.000000,102996.000000,91200.000000,214.575758)}
{pt3dadd(177852.000000,103032.000000,91200.000000,223.000646)}
{pt3dadd(177900.000000,103080.000000,91200.000000,235.663040)}
{pt3dadd(177948.000000,103116.000000,91200.000000,240.301734)}
{pt3dadd(177984.000000,103164.000000,91200.000000,242.796450)}
{pt3dadd(178020.000000,103200.000000,91200.000000,249.590172)}
{pt3dadd(178056.000000,103248.000000,91200.000000,251.966086)}
{pt3dadd(178092.000000,103284.000000,91200.000000,257.080252)}
{pt3dadd(178128.000000,103332.000000,91200.000000,262.194418)}
{pt3dadd(178164.000000,103368.000000,91200.000000,259.699702)}
{pt3dadd(178200.000000,103416.000000,91200.000000,259.699702)}
{pt3dadd(178236.000000,103452.000000,91200.000000,257.323788)}
{pt3dadd(178356.000000,103548.000000,91175.000000,249.833708)}
{pt3dadd(178524.000000,103644.000000,91100.000000,242.343628)}
{pt3dadd(178596.000000,103680.000000,91100.000000,239.967714)}
{pt3dadd(178668.000000,103728.000000,91100.000000,247.832300)}
{pt3dadd(178740.000000,103776.000000,91100.000000,255.322380)}
{pt3dadd(178824.000000,103824.000000,91100.000000,255.322380)}
{pt3dadd(178872.000000,103884.000000,90925.000000,255.322380)}
{pt3dadd(178968.000000,103980.000000,90900.000000,255.322380)}
{pt3dadd(179016.000000,104004.000000,90900.000000,252.571960)}
{pt3dadd(179184.000000,104112.000000,90800.000000,250.075267)}
{pt3dadd(179316.000000,104160.000000,90750.000000,275.042200)}

{create adhoc80}
{access adhoc80}
{connect adhoc80(1), adhoc79(0)}
{nseg = 1}
{strdef color color = "White"}
{pt3dclear()}
{pt3dadd(179316.000000,104160.000000,90750.000000,275.042200)}
{pt3dadd(179424.000000,104160.000000,90700.000000,262.152840)}
{pt3dadd(179472.000000,104232.000000,90650.000000,259.818504)}
{pt3dadd(179532.000000,104328.000000,90600.000000,252.328424)}
{pt3dadd(179664.000000,104436.000000,90600.000000,257.698294)}
{pt3dadd(179760.000000,104484.000000,90475.000000,257.698294)}
{pt3dadd(179976.000000,104556.000000,90450.000000,265.188374)}
{pt3dadd(180168.000000,104628.000000,90375.000000,265.188374)}
{pt3dadd(180336.000000,104664.000000,90325.000000,278.316814)}
{pt3dadd(180468.000000,104760.000000,90250.000000,281.204754)}
{pt3dadd(180636.000000,104808.000000,90175.000000,286.318920)}
{pt3dadd(180684.000000,104844.000000,90175.000000,289.069340)}
{pt3dadd(180852.000000,104964.000000,90175.000000,281.579260)}
{pt3dadd(180936.000000,104952.000000,90175.000000,261.980604)}
{pt3dadd(181116.000000,105000.000000,90075.000000,246.589384)}
{pt3dadd(181296.000000,105036.000000,90075.000000,239.099304)}
{pt3dadd(181416.000000,105012.000000,90025.000000,226.596024)}
{pt3dadd(181572.000000,105084.000000,89925.000000,234.086104)}
{pt3dadd(181692.000000,105120.000000,89950.000000,245.426950)}
{pt3dadd(181860.000000,105180.000000,89900.000000,255.179810)}
{pt3dadd(182028.000000,105168.000000,89800.000000,265.420310)}
{pt3dadd(182160.000000,105204.000000,89775.000000,280.811530)}
{pt3dadd(182292.000000,105228.000000,89725.000000,292.666194)}
{pt3dadd(182412.000000,105288.000000,89675.000000,292.666194)}
{pt3dadd(182604.000000,105336.000000,89700.000000,295.416614)}
{pt3dadd(182736.000000,105408.000000,89600.000000,290.046744)}
{pt3dadd(182868.000000,105408.000000,89600.000000,296.263048)}
{pt3dadd(183012.000000,105468.000000,89575.000000,306.802344)}
{pt3dadd(183144.000000,105504.000000,89500.000000,331.815754)}
{pt3dadd(183276.000000,105468.000000,89400.000000,355.329410)}
{pt3dadd(183408.000000,105528.000000,89350.000000,388.276566)}
{pt3dadd(183612.000000,105564.000000,89200.000000,406.749608)}
{pt3dadd(183696.000000,105612.000000,89175.000000,403.063780)}
{pt3dadd(183780.000000,105624.000000,89175.000000,410.997526)}
{pt3dadd(183852.000000,105636.000000,89175.000000,419.327964)}
{pt3dadd(183924.000000,105648.000000,89175.000000,419.327964)}
{pt3dadd(183996.000000,105660.000000,89175.000000,423.594772)}
{pt3dadd(184068.000000,105672.000000,89175.000000,443.961300)}
{pt3dadd(184140.000000,105684.000000,89125.000000,439.897670)}
{pt3dadd(184200.000000,105696.000000,89050.000000,431.567232)}
{pt3dadd(184260.000000,105708.000000,89050.000000,427.503602)}
{pt3dadd(184308.000000,105720.000000,88975.000000,423.236794)}
{pt3dadd(184368.000000,105732.000000,88975.000000,413.135297)}
{pt3dadd(184428.000000,105744.000000,88975.000000,426.680730)}

{create adhoc81}
{access adhoc81}
{connect adhoc81(1), adhoc80(0)}
{nseg = 1}
{strdef color color = "White"}
{pt3dclear()}
{pt3dadd(184428.000000,105744.000000,88975.000000,426.680730)}
{pt3dadd(184476.000000,105756.000000,88975.000000,406.685103)}
{pt3dadd(184536.000000,105768.000000,88975.000000,399.000150)}
{pt3dadd(184596.000000,105780.000000,88975.000000,383.870260)}
{pt3dadd(184644.000000,105792.000000,88975.000000,372.804000)}
{pt3dadd(184704.000000,105804.000000,88975.000000,356.048400)}
{pt3dadd(184752.000000,105816.000000,88975.000000,332.534744)}
{pt3dadd(184812.000000,105828.000000,88975.000000,322.497316)}
{pt3dadd(184944.000000,105852.000000,88925.000000,312.937860)}
{pt3dadd(185064.000000,105864.000000,88925.000000,309.594708)}
{pt3dadd(185136.000000,105888.000000,88925.000000,318.648413)}
{pt3dadd(185244.000000,105972.000000,88950.000000,334.315520)}

{create adhoc82}
{access adhoc82}
{connect adhoc82(1), adhoc81(0)}
{nseg = 1}
{strdef color color = "White"}
{pt3dclear()}
{pt3dadd(185244.000000,105972.000000,88950.000000,334.315520)}
{pt3dadd(185328.000000,105972.000000,89175.000000,357.452933)}
{pt3dadd(185340.000000,105864.000000,89250.000000,251.272972)}
{pt3dadd(185424.000000,105600.000000,89275.000000,190.339353)}
{pt3dadd(185412.000000,105504.000000,89275.000000,98.724300)}

{create adhoc83}
{access adhoc83}
{connect adhoc83(1), adhoc81(0)}
{nseg = 1}
{strdef color color = "White"}
{pt3dclear()}
{pt3dadd(185244.000000,105972.000000,88950.000000,334.315520)}
{pt3dadd(185424.000000,105912.000000,88875.000000,308.781273)}
{pt3dadd(185604.000000,105936.000000,88875.000000,285.532784)}
{pt3dadd(185772.000000,106080.000000,88925.000000,266.188040)}
{pt3dadd(185916.000000,106152.000000,88925.000000,250.796820)}
{pt3dadd(186036.000000,106200.000000,88875.000000,248.046400)}
{pt3dadd(186168.000000,106260.000000,88875.000000,242.932234)}
{pt3dadd(186324.000000,106308.000000,88875.000000,242.932234)}
{pt3dadd(186480.000000,106368.000000,88875.000000,247.802864)}
{pt3dadd(186612.000000,106452.000000,88800.000000,272.753540)}
{pt3dadd(186768.000000,106524.000000,88800.000000,279.751377)}
{pt3dadd(186888.000000,106584.000000,88850.000000,351.031280)}

{create adhoc84}
{access adhoc84}
{connect adhoc84(1), adhoc83(0)}
{nseg = 1}
{strdef color color = "White"}
{pt3dclear()}
{pt3dadd(186888.000000,106584.000000,88850.000000,351.031280)}
{pt3dadd(187020.000000,106704.000000,88875.000000,396.020020)}
{pt3dadd(187176.000000,106680.000000,88900.000000,412.551112)}
{pt3dadd(187260.000000,106800.000000,88900.000000,412.551112)}
{pt3dadd(187344.000000,106884.000000,88825.000000,426.274368)}
{pt3dadd(187464.000000,107040.000000,88775.000000,383.194556)}
{pt3dadd(187572.000000,107136.000000,88700.000000,354.238402)}
{pt3dadd(187572.000000,107232.000000,88625.000000,335.765360)}
{pt3dadd(187668.000000,107304.000000,88550.000000,329.238248)}
{pt3dadd(187800.000000,107388.000000,88375.000000,315.514992)}
{pt3dadd(187968.000000,107436.000000,88275.000000,318.547336)}
{pt3dadd(188136.000000,107472.000000,88150.000000,312.908976)}
{pt3dadd(188256.000000,107556.000000,88050.000000,298.434862)}
{pt3dadd(188388.000000,107688.000000,87950.000000,287.144708)}
{pt3dadd(188520.000000,107808.000000,87950.000000,270.983924)}
{pt3dadd(188616.000000,107904.000000,87950.000000,254.823140)}
{pt3dadd(188700.000000,108048.000000,87950.000000,257.573560)}
{pt3dadd(188808.000000,108264.000000,87975.000000,246.232714)}
{pt3dadd(188892.000000,108432.000000,87925.000000,236.944276)}
{pt3dadd(189012.000000,108540.000000,87875.000000,230.474060)}
{pt3dadd(189216.000000,108720.000000,87750.000000,224.003844)}
{pt3dadd(189336.000000,108852.000000,87625.000000,201.703914)}
{pt3dadd(189420.000000,109056.000000,87600.000000,187.115770)}
{pt3dadd(189552.000000,109224.000000,87500.000000,173.187368)}
{pt3dadd(189684.000000,109428.000000,87500.000000,162.769984)}
{pt3dadd(189720.000000,109476.000000,87500.000000,155.492250)}
{pt3dadd(189768.000000,109584.000000,87450.000000,150.664080)}
{pt3dadd(189816.000000,109704.000000,87450.000000,150.664080)}
{pt3dadd(189864.000000,109824.000000,87450.000000,155.262340)}
{pt3dadd(189900.000000,109920.000000,87400.000000,161.863460)}
{pt3dadd(189960.000000,110004.000000,87325.000000,165.324930)}
{pt3dadd(189996.000000,110136.000000,87325.000000,182.212530)}
{pt3dadd(190068.000000,110292.000000,87325.000000,201.008110)}
{pt3dadd(190140.000000,110460.000000,87325.000000,212.493280)}
{pt3dadd(190236.000000,110604.000000,87325.000000,216.309544)}
{pt3dadd(190332.000000,110664.000000,87250.000000,218.171136)}
{pt3dadd(190368.000000,110772.000000,87200.000000,204.423186)}
{pt3dadd(190416.000000,110880.000000,87200.000000,186.950606)}
{pt3dadd(190452.000000,110952.000000,87150.000000,170.867176)}
{pt3dadd(190500.000000,111132.000000,87150.000000,156.279032)}
{pt3dadd(190608.000000,111252.000000,87125.000000,150.955970)}
{pt3dadd(190692.000000,111348.000000,87125.000000,150.955970)}
{pt3dadd(190740.000000,111444.000000,87125.000000,153.803730)}
{pt3dadd(190764.000000,111564.000000,87125.000000,165.679724)}
{pt3dadd(190812.000000,111708.000000,87025.000000,176.451604)}
{pt3dadd(190896.000000,111840.000000,87025.000000,185.781746)}
{pt3dadd(190932.000000,111912.000000,86900.000000,189.243216)}
{pt3dadd(190968.000000,111996.000000,86850.000000,206.130816)}
{pt3dadd(191004.000000,112068.000000,86850.000000,202.314552)}
{pt3dadd(191040.000000,112176.000000,86775.000000,202.314552)}
{pt3dadd(191076.000000,112320.000000,86825.000000,200.262144)}
{pt3dadd(191148.000000,112452.000000,86800.000000,196.800674)}
{pt3dadd(191184.000000,112512.000000,86800.000000,183.052724)}
{pt3dadd(191184.000000,112548.000000,86800.000000,183.052724)}
{pt3dadd(191184.000000,112584.000000,86800.000000,193.339204)}
{pt3dadd(191184.000000,112632.000000,86800.000000,189.522940)}
{pt3dadd(191184.000000,112680.000000,86800.000000,196.800674)}
{pt3dadd(191220.000000,112728.000000,86800.000000,198.489194)}
{pt3dadd(191220.000000,112824.000000,86800.000000,195.027724)}
{pt3dadd(191244.000000,112908.000000,86700.000000,184.741244)}
{pt3dadd(191268.000000,112980.000000,86700.000000,190.609916)}
{pt3dadd(191280.000000,113064.000000,86700.000000,181.724068)}
{pt3dadd(191232.000000,113196.000000,86650.000000,183.497018)}
{pt3dadd(191340.000000,113316.000000,86575.000000,194.982188)}
{pt3dadd(191388.000000,113460.000000,86575.000000,215.509168)}
{pt3dadd(191448.000000,113580.000000,86500.000000,242.614872)}
{pt3dadd(191532.000000,113688.000000,86450.000000,274.131720)}
{pt3dadd(191604.000000,113784.000000,86450.000000,294.658700)}
{pt3dadd(191688.000000,113880.000000,86450.000000,330.675636)}
{pt3dadd(191796.000000,113940.000000,86375.000000,327.925216)}
{pt3dadd(191904.000000,113952.000000,86300.000000,321.398104)}
{pt3dadd(192000.000000,114096.000000,86275.000000,331.435532)}
{pt3dadd(192072.000000,114252.000000,86125.000000,328.685112)}
{pt3dadd(192156.000000,114396.000000,86075.000000,311.091740)}
{pt3dadd(192324.000000,114576.000000,85950.000000,311.091740)}
{pt3dadd(192408.000000,114708.000000,85950.000000,294.930956)}
{pt3dadd(192492.000000,114780.000000,85900.000000,271.108658)}
{pt3dadd(192528.000000,114924.000000,85800.000000,271.108658)}
{pt3dadd(192564.000000,115032.000000,85750.000000,254.947874)}
{pt3dadd(192612.000000,115152.000000,85750.000000,240.987578)}
{pt3dadd(192732.000000,115212.000000,85625.000000,243.363492)}
{pt3dadd(192756.000000,115308.000000,85550.000000,234.517362)}
{pt3dadd(192912.000000,115428.000000,85400.000000,227.027282)}
{pt3dadd(192912.000000,115596.000000,85350.000000,227.027282)}
{pt3dadd(192912.000000,115812.000000,85275.000000,235.873412)}
{pt3dadd(192888.000000,115944.000000,85225.000000,233.497498)}
{pt3dadd(192792.000000,116088.000000,85150.000000,262.655610)}
{pt3dadd(192744.000000,116232.000000,85075.000000,282.000354)}
{pt3dadd(192732.000000,116472.000000,84925.000000,301.345098)}
{pt3dadd(192780.000000,116700.000000,84775.000000,306.459264)}
{pt3dadd(192744.000000,116784.000000,84650.000000,306.459264)}
{pt3dadd(192840.000000,117048.000000,84500.000000,291.261448)}
{pt3dadd(192708.000000,117252.000000,84425.000000,262.558733)}
{pt3dadd(192696.000000,117300.000000,84225.000000,275.042200)}

{create adhoc85}
{access adhoc85}
{connect adhoc85(1), adhoc84(0)}
{nseg = 1}
{strdef color color = "White"}
{pt3dclear()}
{pt3dadd(192696.000000,117300.000000,84225.000000,275.042200)}
{pt3dadd(192708.000000,117528.000000,84100.000000,254.421683)}
{pt3dadd(192660.000000,117684.000000,84100.000000,236.801706)}
{pt3dadd(192648.000000,117876.000000,83975.000000,217.252196)}
{pt3dadd(192612.000000,118044.000000,83850.000000,205.911350)}
{pt3dadd(192636.000000,118212.000000,83725.000000,208.174130)}
{pt3dadd(192636.000000,118476.000000,83575.000000,220.082018)}
{pt3dadd(192672.000000,118596.000000,83500.000000,218.127346)}
{pt3dadd(192684.000000,118716.000000,83375.000000,216.438826)}
{pt3dadd(192720.000000,118836.000000,83250.000000,222.909042)}
{pt3dadd(192744.000000,119016.000000,83125.000000,207.552978)}
{pt3dadd(192864.000000,119208.000000,83000.000000,184.706834)}
{pt3dadd(192960.000000,119304.000000,82950.000000,176.244122)}
{pt3dadd(193008.000000,119328.000000,82950.000000,174.636008)}
{pt3dadd(193092.000000,119340.000000,82900.000000,162.576578)}
{pt3dadd(193128.000000,119436.000000,82875.000000,167.646162)}
{pt3dadd(193212.000000,119556.000000,82875.000000,172.715746)}
{pt3dadd(193296.000000,119676.000000,82875.000000,172.715746)}
{pt3dadd(193380.000000,119844.000000,82875.000000,174.323860)}
{pt3dadd(193440.000000,119940.000000,82800.000000,176.096810)}
{pt3dadd(193428.000000,120012.000000,82725.000000,174.323860)}
{pt3dadd(193464.000000,120144.000000,82700.000000,178.140124)}
{pt3dadd(193500.000000,120228.000000,82650.000000,181.279774)}
{pt3dadd(193572.000000,120324.000000,82575.000000,181.279774)}
{pt3dadd(193584.000000,120408.000000,82525.000000,201.806754)}
{pt3dadd(193716.000000,120648.000000,82425.000000,226.994624)}
{pt3dadd(193740.000000,120744.000000,82475.000000,238.335470)}
{pt3dadd(193740.000000,120876.000000,82400.000000,243.658532)}
{pt3dadd(193764.000000,120984.000000,82400.000000,250.936266)}
{pt3dadd(193812.000000,121092.000000,82400.000000,232.270878)}
{pt3dadd(193848.000000,121224.000000,82275.000000,212.672222)}
{pt3dadd(193956.000000,121464.000000,82175.000000,195.742162)}
{pt3dadd(194004.000000,121524.000000,82125.000000,193.880570)}
{pt3dadd(193992.000000,121644.000000,82050.000000,186.602836)}
{pt3dadd(194004.000000,121752.000000,81950.000000,181.279774)}
{pt3dadd(194064.000000,121884.000000,81850.000000,175.690560)}
{pt3dadd(194052.000000,121956.000000,81875.000000,179.325102)}
{pt3dadd(194088.000000,122016.000000,81875.000000,180.538020)}
{pt3dadd(194172.000000,122088.000000,81875.000000,195.467360)}

{create adhoc86}
{access adhoc86}
{connect adhoc86(1), adhoc85(0)}
{nseg = 1}
{strdef color color = "White"}
{pt3dclear()}
{pt3dadd(194172.000000,122088.000000,81875.000000,195.467360)}
{pt3dadd(194256.000000,122160.000000,81875.000000,186.307137)}
{pt3dadd(194364.000000,122328.000000,81775.000000,182.702142)}
{pt3dadd(194580.000000,122436.000000,81575.000000,180.840550)}
{pt3dadd(194676.000000,122520.000000,81425.000000,176.012380)}
{pt3dadd(194820.000000,122580.000000,81475.000000,170.942796)}
{pt3dadd(194916.000000,122640.000000,81375.000000,163.266866)}
{pt3dadd(194952.000000,122676.000000,81275.000000,155.590936)}
{pt3dadd(194964.000000,122748.000000,81250.000000,146.142056)}
{pt3dadd(194976.000000,122820.000000,81250.000000,141.971296)}
{pt3dadd(195024.000000,122892.000000,81250.000000,136.269000)}
{pt3dadd(195096.000000,122928.000000,81250.000000,133.686000)}
{pt3dadd(195144.000000,123024.000000,81250.000000,132.363000)}
{pt3dadd(195204.000000,123060.000000,81250.000000,132.363000)}
{pt3dadd(195264.000000,123168.000000,81150.000000,132.363000)}
{pt3dadd(195372.000000,123288.000000,81150.000000,131.103000)}
{pt3dadd(195480.000000,123420.000000,81150.000000,132.363000)}
{pt3dadd(195588.000000,123540.000000,81150.000000,135.075150)}
{pt3dadd(195696.000000,123660.000000,81150.000000,135.075150)}
{pt3dadd(195780.000000,123708.000000,81150.000000,133.815150)}
{pt3dadd(195864.000000,123768.000000,81150.000000,135.075150)}
{pt3dadd(195900.000000,123852.000000,81150.000000,136.398150)}
{pt3dadd(195996.000000,123972.000000,81150.000000,136.398150)}
{pt3dadd(196044.000000,124044.000000,81125.000000,140.777446)}
{pt3dadd(196104.000000,124200.000000,81150.000000,154.670918)}
{pt3dadd(196200.000000,124344.000000,81150.000000,157.383068)}
{pt3dadd(196296.000000,124500.000000,81150.000000,160.230828)}
{pt3dadd(196416.000000,124596.000000,81225.000000,168.290558)}
{pt3dadd(196536.000000,124716.000000,81225.000000,171.587192)}
{pt3dadd(196584.000000,124800.000000,81225.000000,169.725600)}
{pt3dadd(196632.000000,124860.000000,81225.000000,176.012380)}
{pt3dadd(196668.000000,124932.000000,81200.000000,182.613500)}
{pt3dadd(196764.000000,125040.000000,81175.000000,180.840550)}
{pt3dadd(196884.000000,125256.000000,81150.000000,174.553770)}
{pt3dadd(196956.000000,125352.000000,81125.000000,172.780820)}
{pt3dadd(196980.000000,125472.000000,81075.000000,171.092300)}
{pt3dadd(197016.000000,125652.000000,81025.000000,172.953892)}
{pt3dadd(197016.000000,125784.000000,81000.000000,171.265372)}
{pt3dadd(197004.000000,126144.000000,80875.000000,174.255518)}
{pt3dadd(196956.000000,126312.000000,80900.000000,176.028468)}
{pt3dadd(196896.000000,126420.000000,80825.000000,176.028468)}
{pt3dadd(196884.000000,126588.000000,80750.000000,167.565756)}
{pt3dadd(196872.000000,126744.000000,80700.000000,165.957642)}
{pt3dadd(196824.000000,126912.000000,80625.000000,172.888818)}
{pt3dadd(196788.000000,127128.000000,80550.000000,193.415798)}
{pt3dadd(196740.000000,127236.000000,80450.000000,204.900968)}
{pt3dadd(196644.000000,127404.000000,80375.000000,209.729138)}
{pt3dadd(196608.000000,127452.000000,80375.000000,222.822422)}
{pt3dadd(196488.000000,127620.000000,80175.000000,233.623224)}
{pt3dadd(196416.000000,127860.000000,80025.000000,214.957836)}
{pt3dadd(196392.000000,128052.000000,79925.000000,210.750400)}
{pt3dadd(196332.000000,128196.000000,79925.000000,210.750400)}
{pt3dadd(196344.000000,128400.000000,79875.000000,200.953750)}
{pt3dadd(196416.000000,128532.000000,79875.000000,190.152948)}
{pt3dadd(196368.000000,128664.000000,79725.000000,181.690236)}
{pt3dadd(196272.000000,128820.000000,79700.000000,174.412502)}
{pt3dadd(196104.000000,128904.000000,79600.000000,166.736572)}
{pt3dadd(195936.000000,129000.000000,79575.000000,153.640283)}
{pt3dadd(195852.000000,129096.000000,79550.000000,138.915000)}

{create adhoc87}
{access adhoc87}
{connect adhoc87(1), adhoc85(0)}
{nseg = 1}
{strdef color color = "White"}
{pt3dclear()}
{pt3dadd(194172.000000,122088.000000,81875.000000,195.467360)}
{pt3dadd(194088.000000,122280.000000,81675.000000,169.810880)}
{pt3dadd(194064.000000,122424.000000,81575.000000,190.453032)}
{pt3dadd(194088.000000,122496.000000,81525.000000,183.521856)}
{pt3dadd(194004.000000,122616.000000,81450.000000,188.350026)}
{pt3dadd(193908.000000,122796.000000,81375.000000,185.359880)}
{pt3dadd(193788.000000,123060.000000,81225.000000,170.003816)}
{pt3dadd(193764.000000,123168.000000,81225.000000,161.322293)}
{pt3dadd(193740.000000,123204.000000,81225.000000,160.811480)}

{create adhoc88}
{access adhoc88}
{connect adhoc88(1), adhoc84(0)}
{nseg = 1}
{strdef color color = "White"}
{pt3dclear()}
{pt3dadd(192696.000000,117300.000000,84225.000000,275.042200)}
{pt3dadd(193044.000000,117204.000000,84475.000000,250.691160)}
{pt3dadd(193212.000000,117216.000000,84425.000000,201.054838)}
{pt3dadd(193308.000000,117264.000000,84375.000000,172.506398)}
{pt3dadd(193416.000000,117300.000000,84275.000000,128.760142)}
{pt3dadd(193524.000000,117288.000000,84150.000000,121.469311)}
{pt3dadd(193656.000000,117372.000000,83925.000000,112.490939)}
{pt3dadd(193812.000000,117432.000000,83850.000000,109.378657)}
{pt3dadd(193896.000000,117504.000000,83850.000000,112.090807)}
{pt3dadd(193932.000000,117564.000000,83800.000000,105.375667)}
{pt3dadd(194088.000000,117756.000000,83750.000000,106.271126)}
{pt3dadd(194220.000000,117972.000000,83575.000000,103.710643)}
{pt3dadd(194424.000000,118068.000000,83425.000000,101.874952)}
{pt3dadd(194568.000000,118104.000000,83350.000000,92.447662)}
{pt3dadd(194736.000000,118368.000000,83200.000000,92.447662)}
{pt3dadd(194832.000000,118476.000000,83075.000000,94.375137)}
{pt3dadd(194868.000000,118548.000000,83075.000000,96.040161)}
{pt3dadd(194928.000000,118632.000000,83075.000000,104.590992)}
{pt3dadd(194976.000000,118704.000000,83075.000000,111.306132)}
{pt3dadd(195096.000000,118776.000000,82975.000000,112.293375)}
{pt3dadd(195180.000000,118908.000000,82975.000000,107.805417)}
{pt3dadd(195276.000000,119088.000000,83000.000000,106.952600)}
{pt3dadd(195372.000000,119292.000000,83000.000000,90.054334)}
{pt3dadd(195456.000000,119376.000000,83000.000000,85.281760)}

{create adhoc89}
{access adhoc89}
{connect adhoc89(1), adhoc83(0)}
{nseg = 1}
{strdef color color = "White"}
{pt3dclear()}
{pt3dadd(186888.000000,106584.000000,88850.000000,351.031280)}
{pt3dadd(187068.000000,106536.000000,89050.000000,375.325573)}
{pt3dadd(187236.000000,106500.000000,89150.000000,294.589520)}
{pt3dadd(187440.000000,106512.000000,89225.000000,253.555414)}
{pt3dadd(187668.000000,106476.000000,89350.000000,210.469602)}
{pt3dadd(187836.000000,106488.000000,89400.000000,168.290558)}
{pt3dadd(188016.000000,106308.000000,89450.000000,172.106822)}
{pt3dadd(188112.000000,106272.000000,89450.000000,180.992670)}
{pt3dadd(188208.000000,106248.000000,89450.000000,192.868664)}
{pt3dadd(188304.000000,106212.000000,89450.000000,205.338456)}
{pt3dadd(188412.000000,106188.000000,89450.000000,203.476864)}
{pt3dadd(188508.000000,106152.000000,89450.000000,199.660600)}
{pt3dadd(188556.000000,106152.000000,89500.000000,194.071386)}
{pt3dadd(188604.000000,106164.000000,89500.000000,194.071386)}
{pt3dadd(188664.000000,106176.000000,89500.000000,188.202714)}
{pt3dadd(188724.000000,106188.000000,89500.000000,188.202714)}
{pt3dadd(188772.000000,106200.000000,89500.000000,190.064306)}
{pt3dadd(188832.000000,106212.000000,89500.000000,191.837256)}
{pt3dadd(188892.000000,106224.000000,89500.000000,186.248042)}
{pt3dadd(188940.000000,106236.000000,89500.000000,181.178458)}
{pt3dadd(189108.000000,106248.000000,89475.000000,176.108874)}
{pt3dadd(189216.000000,106284.000000,89450.000000,174.247282)}
{pt3dadd(189324.000000,106308.000000,89450.000000,172.474332)}
{pt3dadd(189432.000000,106344.000000,89450.000000,178.063546)}
{pt3dadd(189540.000000,106368.000000,89450.000000,186.949394)}
{pt3dadd(189648.000000,106404.000000,89450.000000,193.880570)}
{pt3dadd(189756.000000,106428.000000,89450.000000,199.749242)}
{pt3dadd(189864.000000,106464.000000,89450.000000,207.390864)}
{pt3dadd(189972.000000,106488.000000,89450.000000,211.598300)}
{pt3dadd(190104.000000,106524.000000,89450.000000,228.309016)}
{pt3dadd(190236.000000,106596.000000,89450.000000,241.604534)}
{pt3dadd(190392.000000,106644.000000,89450.000000,256.262842)}
{pt3dadd(190572.000000,106668.000000,89425.000000,273.809090)}
{pt3dadd(190644.000000,106740.000000,89425.000000,289.200310)}
{pt3dadd(190716.000000,106812.000000,89425.000000,292.088250)}
{pt3dadd(190788.000000,106896.000000,89425.000000,289.593534)}
{pt3dadd(190920.000000,107004.000000,89350.000000,295.513818)}
{pt3dadd(191100.000000,107220.000000,89375.000000,289.875458)}
{pt3dadd(191268.000000,107400.000000,89475.000000,306.631058)}
{pt3dadd(191304.000000,107592.000000,89625.000000,309.663402)}
{pt3dadd(191376.000000,107724.000000,89800.000000,309.663402)}
{pt3dadd(191508.000000,107940.000000,89900.000000,293.502618)}
{pt3dadd(191520.000000,108024.000000,90000.000000,277.587650)}
{pt3dadd(191604.000000,108192.000000,90175.000000,243.285802)}
{pt3dadd(191616.000000,108396.000000,90300.000000,220.654802)}
{pt3dadd(191604.000000,108576.000000,90425.000000,206.219458)}
{pt3dadd(191664.000000,108780.000000,90550.000000,190.863394)}
{pt3dadd(191688.000000,108912.000000,90675.000000,194.870474)}
{pt3dadd(191676.000000,109068.000000,90750.000000,189.001802)}
{pt3dadd(191712.000000,109188.000000,90875.000000,183.412588)}
{pt3dadd(191640.000000,109284.000000,91000.000000,193.209238)}
{pt3dadd(191700.000000,109440.000000,91150.000000,204.147494)}
{pt3dadd(191688.000000,109572.000000,91300.000000,202.095086)}
{pt3dadd(191580.000000,109752.000000,91425.000000,202.095086)}
{pt3dadd(191580.000000,109908.000000,91550.000000,200.406566)}
{pt3dadd(191592.000000,110088.000000,91675.000000,196.199130)}
{pt3dadd(191520.000000,110256.000000,91875.000000,198.354158)}
{pt3dadd(191460.000000,110268.000000,92000.000000,209.695004)}
{pt3dadd(191484.000000,110532.000000,92175.000000,230.221984)}
{pt3dadd(191484.000000,110676.000000,92250.000000,260.130718)}
{pt3dadd(191424.000000,110928.000000,92375.000000,289.711657)}
{pt3dadd(191328.000000,111084.000000,92425.000000,318.395720)}

{create adhoc90}
{access adhoc90}
{connect adhoc90(1), adhoc89(0)}
{nseg = 1}
{strdef color color = "White"}
{pt3dclear()}
{pt3dadd(191328.000000,111084.000000,92425.000000,318.395720)}
{pt3dadd(191352.000000,111132.000000,92350.000000,250.484960)}
{pt3dadd(191364.000000,111252.000000,92350.000000,250.554996)}
{pt3dadd(191376.000000,111372.000000,92350.000000,203.119997)}
{pt3dadd(191388.000000,111480.000000,92350.000000,173.510806)}
{pt3dadd(191376.000000,111600.000000,92350.000000,154.162194)}
{pt3dadd(191328.000000,111792.000000,92375.000000,125.613754)}
{pt3dadd(191316.000000,111984.000000,92425.000000,103.215316)}
{pt3dadd(191280.000000,112152.000000,92425.000000,114.754171)}
{pt3dadd(191196.000000,112284.000000,92475.000000,123.305002)}
{pt3dadd(191112.000000,112356.000000,92500.000000,131.343142)}
{pt3dadd(191004.000000,112392.000000,92500.000000,131.343142)}
{pt3dadd(190980.000000,112476.000000,92475.000000,140.648296)}
{pt3dadd(190992.000000,112596.000000,92500.000000,158.120876)}
{pt3dadd(190980.000000,112752.000000,92550.000000,174.761428)}
{pt3dadd(190980.000000,112884.000000,92500.000000,188.026572)}
{pt3dadd(191004.000000,113004.000000,92500.000000,204.667124)}
{pt3dadd(191016.000000,113136.000000,92500.000000,204.667124)}
{pt3dadd(190992.000000,113316.000000,92500.000000,196.643424)}
{pt3dadd(190980.000000,113508.000000,92500.000000,196.643424)}
{pt3dadd(191016.000000,113484.000000,92350.000000,192.827160)}
{pt3dadd(191052.000000,113640.000000,92325.000000,181.888904)}
{pt3dadd(191076.000000,113844.000000,92325.000000,178.898758)}
{pt3dadd(191088.000000,114084.000000,92300.000000,180.760350)}
{pt3dadd(191124.000000,114276.000000,92275.000000,190.048788)}
{pt3dadd(191280.000000,114480.000000,92125.000000,183.447668)}
{pt3dadd(191400.000000,114540.000000,92025.000000,181.916132)}
{pt3dadd(191472.000000,114624.000000,92050.000000,183.374742)}
{pt3dadd(191580.000000,114708.000000,92025.000000,172.064270)}
{pt3dadd(191808.000000,114888.000000,91975.000000,156.907160)}
{pt3dadd(191928.000000,114996.000000,91825.000000,155.448550)}
{pt3dadd(192036.000000,115032.000000,91725.000000,160.276720)}
{pt3dadd(192168.000000,115128.000000,91625.000000,168.739432)}
{pt3dadd(192372.000000,115344.000000,91475.000000,188.474792)}
{pt3dadd(192480.000000,115452.000000,91350.000000,201.137186)}
{pt3dadd(192672.000000,115524.000000,91300.000000,219.483396)}
{pt3dadd(192828.000000,115572.000000,91325.000000,223.117938)}
{pt3dadd(192948.000000,115596.000000,91200.000000,223.117938)}
{pt3dadd(193056.000000,115740.000000,91200.000000,209.369988)}
{pt3dadd(193104.000000,115824.000000,91175.000000,179.220574)}
{pt3dadd(193128.000000,115908.000000,91175.000000,151.447074)}
{pt3dadd(193188.000000,116016.000000,91200.000000,132.098462)}
{pt3dadd(193260.000000,116124.000000,91225.000000,113.737093)}
{pt3dadd(193380.000000,116220.000000,91225.000000,140.613483)}
{pt3dadd(193476.000000,116292.000000,91225.000000,151.499383)}
{pt3dadd(193584.000000,116376.000000,91225.000000,162.385283)}
{pt3dadd(193680.000000,116448.000000,91225.000000,173.271183)}
{pt3dadd(193716.000000,116520.000000,91250.000000,183.169840)}
{pt3dadd(193776.000000,116604.000000,91250.000000,143.255143)}
{pt3dadd(193824.000000,116676.000000,91250.000000,139.084383)}
{pt3dadd(193932.000000,116724.000000,91250.000000,129.185726)}
{pt3dadd(194028.000000,116760.000000,91250.000000,118.299826)}
{pt3dadd(194052.000000,116808.000000,91300.000000,111.669066)}
{pt3dadd(194088.000000,116856.000000,91325.000000,113.794105)}
{pt3dadd(194124.000000,116928.000000,91300.000000,115.117105)}
{pt3dadd(194160.000000,116988.000000,91300.000000,122.168002)}
{pt3dadd(194160.000000,117072.000000,91300.000000,130.705237)}
{pt3dadd(194172.000000,117168.000000,91300.000000,138.915000)}

{create adhoc91}
{access adhoc91}
{connect adhoc91(1), adhoc90(0)}
{nseg = 1}
{strdef color color = "White"}
{pt3dclear()}
{pt3dadd(194172.000000,117168.000000,91300.000000,138.915000)}
{pt3dadd(194172.000000,117264.000000,91300.000000,127.163505)}
{pt3dadd(194172.000000,117348.000000,91300.000000,108.941190)}
{pt3dadd(194244.000000,117444.000000,91325.000000,88.958650)}
{pt3dadd(194244.000000,117516.000000,91275.000000,73.669590)}

{create adhoc92}
{access adhoc92}
{connect adhoc92(1), adhoc90(0)}
{nseg = 1}
{strdef color color = "White"}
{pt3dclear()}
{pt3dadd(194172.000000,117168.000000,91300.000000,138.915000)}
{pt3dadd(194184.000000,117216.000000,91075.000000,137.142522)}
{pt3dadd(194196.000000,117348.000000,90950.000000,142.088423)}
{pt3dadd(194184.000000,117444.000000,90850.000000,136.074131)}
{pt3dadd(194160.000000,117540.000000,90800.000000,123.035824)}
{pt3dadd(194184.000000,117624.000000,90725.000000,121.108349)}
{pt3dadd(194088.000000,117780.000000,90675.000000,109.845368)}
{pt3dadd(194076.000000,117828.000000,90600.000000,94.685222)}
{pt3dadd(193992.000000,117864.000000,90425.000000,86.974018)}
{pt3dadd(194064.000000,117948.000000,90300.000000,77.353070)}

{create adhoc93}
{access adhoc93}
{connect adhoc93(1), adhoc89(0)}
{nseg = 1}
{strdef color color = "White"}
{pt3dclear()}
{pt3dadd(191328.000000,111084.000000,92425.000000,318.395720)}
{pt3dadd(191412.000000,111168.000000,92650.000000,303.474673)}
{pt3dadd(191376.000000,111084.000000,92875.000000,279.497438)}
{pt3dadd(191364.000000,111132.000000,93075.000000,256.866438)}
{pt3dadd(191292.000000,111120.000000,93250.000000,237.267782)}
{pt3dadd(191172.000000,111180.000000,93350.000000,218.602394)}
{pt3dadd(191148.000000,111288.000000,93550.000000,223.473024)}
{pt3dadd(191124.000000,111348.000000,93725.000000,228.587190)}
{pt3dadd(191088.000000,111264.000000,93925.000000,230.639598)}
{pt3dadd(191052.000000,111240.000000,94100.000000,221.753750)}
{pt3dadd(190908.000000,111240.000000,94200.000000,219.892158)}
{pt3dadd(190776.000000,111300.000000,94400.000000,187.491213)}
{pt3dadd(190656.000000,111336.000000,94525.000000,186.159400)}

{create adhoc94}
{access adhoc94}
{connect adhoc94(1), adhoc80(0)}
{nseg = 1}
{strdef color color = "White"}
{pt3dclear()}
{pt3dadd(184428.000000,105744.000000,88975.000000,426.680730)}
{pt3dadd(184416.000000,105864.000000,88850.000000,394.091863)}
{pt3dadd(184440.000000,106008.000000,88750.000000,429.325474)}
{pt3dadd(184512.000000,106152.000000,88675.000000,366.846470)}
{pt3dadd(184512.000000,106284.000000,88675.000000,326.900308)}
{pt3dadd(184512.000000,106428.000000,88675.000000,284.956838)}
{pt3dadd(184632.000000,106536.000000,88550.000000,227.217726)}
{pt3dadd(184620.000000,106608.000000,88400.000000,165.296922)}
{pt3dadd(184692.000000,106812.000000,88225.000000,174.602076)}
{pt3dadd(184704.000000,106908.000000,88150.000000,176.290596)}
{pt3dadd(184752.000000,107016.000000,88075.000000,178.063546)}
{pt3dadd(184800.000000,107148.000000,87925.000000,170.785812)}
{pt3dadd(184800.000000,107292.000000,87875.000000,166.406516)}
{pt3dadd(184788.000000,107376.000000,87800.000000,160.704220)}
{pt3dadd(184752.000000,107436.000000,87800.000000,151.705290)}
{pt3dadd(184716.000000,107496.000000,87800.000000,140.933410)}
{pt3dadd(184704.000000,107568.000000,87800.000000,132.363000)}
{pt3dadd(184728.000000,107676.000000,87700.000000,122.489169)}
{pt3dadd(184764.000000,107832.000000,87675.000000,113.085521)}
{pt3dadd(184800.000000,107904.000000,87675.000000,106.370381)}
{pt3dadd(184812.000000,108024.000000,87675.000000,106.370381)}
{pt3dadd(184824.000000,108156.000000,87675.000000,104.027523)}
{pt3dadd(184848.000000,108360.000000,87675.000000,115.103337)}
{pt3dadd(184836.000000,108588.000000,87525.000000,114.285710)}

{create adhoc95}
{access adhoc95}
{connect adhoc95(1), adhoc94(0)}
{nseg = 1}
{strdef color color = "White"}
{pt3dclear()}
{pt3dadd(184836.000000,108588.000000,87525.000000,114.285710)}
{pt3dadd(184872.000000,108744.000000,87475.000000,110.657597)}
{pt3dadd(184920.000000,108972.000000,87400.000000,111.126661)}
{pt3dadd(184932.000000,109080.000000,87325.000000,109.001622)}
{pt3dadd(185016.000000,109236.000000,87300.000000,106.037542)}
{pt3dadd(185076.000000,109320.000000,87300.000000,102.178003)}
{pt3dadd(185136.000000,109356.000000,87300.000000,94.422148)}
{pt3dadd(185196.000000,109380.000000,87300.000000,101.473045)}
{pt3dadd(185232.000000,109428.000000,87300.000000,102.509650)}
{pt3dadd(185280.000000,109464.000000,87275.000000,100.761374)}
{pt3dadd(185352.000000,109572.000000,87250.000000,105.709347)}
{pt3dadd(185520.000000,109728.000000,87150.000000,114.665202)}
{pt3dadd(185604.000000,109896.000000,87125.000000,113.342202)}
{pt3dadd(185628.000000,110016.000000,87100.000000,123.735790)}
{pt3dadd(185652.000000,110088.000000,87100.000000,143.911318)}
{pt3dadd(185664.000000,110136.000000,87100.000000,154.824586)}
{pt3dadd(185688.000000,110196.000000,87100.000000,163.394996)}
{pt3dadd(185712.000000,110256.000000,87100.000000,174.166876)}
{pt3dadd(185796.000000,110352.000000,87100.000000,179.236460)}
{pt3dadd(185880.000000,110436.000000,87100.000000,181.098052)}
{pt3dadd(185952.000000,110532.000000,87100.000000,188.375786)}
{pt3dadd(185952.000000,110604.000000,87150.000000,191.837256)}
{pt3dadd(186096.000000,110784.000000,87275.000000,183.777526)}
{pt3dadd(186072.000000,110928.000000,87325.000000,175.717796)}
{pt3dadd(186036.000000,111060.000000,87350.000000,167.255084)}
{pt3dadd(186084.000000,111240.000000,87400.000000,167.255084)}
{pt3dadd(186120.000000,111336.000000,87450.000000,149.768064)}
{pt3dadd(186192.000000,111696.000000,87575.000000,152.758210)}
{pt3dadd(186156.000000,111816.000000,87550.000000,152.758210)}
{pt3dadd(186144.000000,111960.000000,87575.000000,144.984592)}
{pt3dadd(186144.000000,112080.000000,87575.000000,129.136448)}
{pt3dadd(186120.000000,112188.000000,87575.000000,128.196216)}
{pt3dadd(186132.000000,112296.000000,87575.000000,117.802628)}
{pt3dadd(186144.000000,112428.000000,87675.000000,127.723950)}
{pt3dadd(186144.000000,112596.000000,87650.000000,131.326808)}
{pt3dadd(186084.000000,112752.000000,87650.000000,133.909808)}
{pt3dadd(186096.000000,112944.000000,87650.000000,144.277330)}
{pt3dadd(186036.000000,113076.000000,87625.000000,143.240725)}
{pt3dadd(186012.000000,113172.000000,87625.000000,128.147253)}
{pt3dadd(186000.000000,113256.000000,87625.000000,126.887253)}
{pt3dadd(186000.000000,113328.000000,87625.000000,120.872961)}
{pt3dadd(186000.000000,113412.000000,87625.000000,110.505439)}
{pt3dadd(186012.000000,113496.000000,87625.000000,110.505439)}
{pt3dadd(186024.000000,113580.000000,87625.000000,110.505439)}
{pt3dadd(186036.000000,113664.000000,87625.000000,104.110067)}
{pt3dadd(186048.000000,113736.000000,87625.000000,107.541359)}
{pt3dadd(186060.000000,113820.000000,87625.000000,120.899027)}
{pt3dadd(186144.000000,113916.000000,87625.000000,123.024066)}
{pt3dadd(186216.000000,113964.000000,87550.000000,125.484066)}
{pt3dadd(186312.000000,114036.000000,87525.000000,137.310198)}
{pt3dadd(186372.000000,114168.000000,87475.000000,132.842301)}
{pt3dadd(186432.000000,114312.000000,87400.000000,122.448713)}
{pt3dadd(186468.000000,114468.000000,87350.000000,119.336431)}
{pt3dadd(186480.000000,114528.000000,87300.000000,113.608534)}
{pt3dadd(186576.000000,114696.000000,87275.000000,101.782402)}
{pt3dadd(186588.000000,114852.000000,87275.000000,98.959468)}
{pt3dadd(186648.000000,114996.000000,87275.000000,94.247112)}
{pt3dadd(186648.000000,115104.000000,87300.000000,105.133012)}
{pt3dadd(186684.000000,115164.000000,87300.000000,101.457261)}
{pt3dadd(186708.000000,115224.000000,87300.000000,103.384736)}
{pt3dadd(186732.000000,115284.000000,87300.000000,104.280195)}
{pt3dadd(186756.000000,115356.000000,87300.000000,105.133012)}
{pt3dadd(186792.000000,115440.000000,87300.000000,93.306880)}
{pt3dadd(186840.000000,115500.000000,87300.000000,95.055156)}
{pt3dadd(186876.000000,115584.000000,87300.000000,92.530708)}
{pt3dadd(186888.000000,115608.000000,87300.000000,94.023140)}

{create adhoc96}
{access adhoc96}
{connect adhoc96(1), adhoc94(0)}
{nseg = 1}
{strdef color color = "White"}
{pt3dclear()}
{pt3dadd(184836.000000,108588.000000,87525.000000,114.285710)}
{pt3dadd(184752.000000,108564.000000,87725.000000,145.430520)}
{pt3dadd(184644.000000,108612.000000,87750.000000,125.046767)}
{pt3dadd(184524.000000,108768.000000,87875.000000,123.958333)}
{pt3dadd(184368.000000,108912.000000,87950.000000,119.360073)}
{pt3dadd(184284.000000,109032.000000,88025.000000,129.777457)}
{pt3dadd(184200.000000,109212.000000,88100.000000,161.434344)}
{pt3dadd(184080.000000,109356.000000,88100.000000,211.241096)}
{pt3dadd(183960.000000,109500.000000,88175.000000,256.335492)}
{pt3dadd(183852.000000,109584.000000,88250.000000,268.211486)}
{pt3dadd(183684.000000,109824.000000,88525.000000,264.395222)}
{pt3dadd(183648.000000,109920.000000,88525.000000,229.062584)}
{pt3dadd(183648.000000,110100.000000,88600.000000,181.004108)}
{pt3dadd(183684.000000,110256.000000,88675.000000,121.821433)}
{pt3dadd(183756.000000,110424.000000,88700.000000,94.023140)}

{create adhoc97}
{access adhoc97}
{connect adhoc97(1), adhoc79(0)}
{nseg = 1}
{strdef color color = "White"}
{pt3dclear()}
{pt3dadd(179316.000000,104160.000000,90750.000000,275.042200)}
{pt3dadd(179352.000000,104412.000000,90775.000000,294.077407)}
{pt3dadd(179352.000000,104520.000000,90875.000000,259.237884)}
{pt3dadd(179352.000000,104640.000000,90950.000000,222.138613)}
{pt3dadd(179376.000000,104748.000000,90950.000000,177.264097)}
{pt3dadd(179460.000000,104856.000000,90950.000000,139.250097)}
{pt3dadd(179472.000000,104916.000000,90950.000000,102.150826)}
{pt3dadd(179472.000000,105012.000000,90950.000000,95.099929)}
{pt3dadd(179436.000000,105108.000000,91000.000000,93.434905)}
{pt3dadd(179364.000000,105180.000000,91000.000000,97.487419)}
{pt3dadd(179364.000000,105312.000000,91025.000000,105.525559)}
{pt3dadd(179316.000000,105444.000000,91075.000000,115.399390)}
{pt3dadd(179268.000000,105516.000000,91075.000000,122.450287)}
{pt3dadd(179220.000000,105564.000000,91100.000000,143.438022)}
{pt3dadd(179208.000000,105624.000000,91100.000000,144.580880)}
{pt3dadd(179184.000000,105696.000000,91125.000000,148.960176)}
{pt3dadd(179088.000000,105864.000000,91125.000000,148.960176)}
{pt3dadd(178980.000000,105948.000000,91150.000000,147.637176)}
{pt3dadd(178932.000000,106056.000000,91200.000000,135.605296)}
{pt3dadd(178836.000000,106188.000000,91175.000000,138.065296)}
{pt3dadd(178764.000000,106260.000000,91175.000000,132.363000)}
{pt3dadd(178668.000000,106332.000000,91200.000000,129.780000)}
{pt3dadd(178524.000000,106428.000000,91250.000000,132.492150)}
{pt3dadd(178464.000000,106452.000000,91300.000000,137.922910)}
{pt3dadd(178404.000000,106464.000000,91300.000000,140.635060)}
{pt3dadd(178368.000000,106536.000000,91300.000000,141.958060)}
{pt3dadd(178344.000000,106608.000000,91300.000000,143.218060)}
{pt3dadd(178332.000000,106692.000000,91300.000000,136.903052)}
{pt3dadd(178320.000000,106764.000000,91300.000000,138.434588)}
{pt3dadd(178308.000000,106896.000000,91300.000000,137.045438)}
{pt3dadd(178296.000000,107016.000000,91300.000000,138.434588)}
{pt3dadd(178224.000000,107112.000000,91375.000000,134.831730)}
{pt3dadd(178164.000000,107232.000000,91400.000000,129.883757)}
{pt3dadd(178152.000000,107400.000000,91450.000000,117.466321)}
{pt3dadd(178176.000000,107508.000000,91450.000000,109.428181)}
{pt3dadd(178164.000000,107736.000000,91450.000000,109.428181)}
{pt3dadd(178152.000000,107940.000000,91375.000000,113.031039)}
{pt3dadd(178140.000000,108024.000000,91450.000000,117.979012)}
{pt3dadd(178092.000000,108216.000000,91475.000000,127.406302)}
{pt3dadd(178056.000000,108348.000000,91475.000000,136.833592)}
{pt3dadd(177972.000000,108468.000000,91450.000000,135.444442)}
{pt3dadd(177996.000000,108612.000000,91500.000000,135.444442)}
{pt3dadd(177948.000000,108696.000000,91500.000000,136.587300)}
{pt3dadd(177960.000000,108780.000000,91500.000000,126.219778)}
{pt3dadd(177984.000000,108864.000000,91525.000000,116.792488)}
{pt3dadd(177984.000000,108900.000000,91525.000000,114.209488)}
{pt3dadd(177996.000000,108972.000000,91525.000000,108.481591)}
{pt3dadd(178032.000000,109032.000000,91525.000000,105.213694)}
{pt3dadd(178056.000000,109092.000000,91525.000000,108.177774)}
{pt3dadd(178128.000000,109176.000000,91475.000000,106.342083)}
{pt3dadd(178140.000000,109272.000000,91425.000000,99.051252)}
{pt3dadd(178128.000000,109356.000000,91400.000000,102.319149)}
{pt3dadd(178200.000000,109464.000000,91425.000000,103.355754)}
{pt3dadd(178224.000000,109572.000000,91350.000000,108.047046)}
{pt3dadd(178284.000000,109740.000000,91250.000000,116.597877)}
{pt3dadd(178332.000000,109812.000000,91175.000000,124.481180)}
{pt3dadd(178332.000000,109848.000000,91125.000000,132.300000)}

{create adhoc98}
{access adhoc98}
{connect adhoc98(1), adhoc38(0)}
{nseg = 1}
{strdef color color = "White"}
{pt3dclear()}
{pt3dadd(173820.000000,99624.000000,88025.000000,729.768860)}
{pt3dadd(174060.000000,99816.000000,87775.000000,849.399320)}
{pt3dadd(174216.000000,99924.000000,87625.000000,882.195792)}
{pt3dadd(174396.000000,99984.000000,87550.000000,766.872780)}
{pt3dadd(174576.000000,100044.000000,87550.000000,624.923990)}
{pt3dadd(174768.000000,100044.000000,87525.000000,483.901470)}
{pt3dadd(174972.000000,100020.000000,87375.000000,350.012360)}
{pt3dadd(175080.000000,100032.000000,87350.000000,218.742700)}
{pt3dadd(175200.000000,100068.000000,87325.000000,223.570870)}
{pt3dadd(175308.000000,100080.000000,87225.000000,220.274236)}
{pt3dadd(175488.000000,100092.000000,87200.000000,222.537016)}
{pt3dadd(175680.000000,100116.000000,87150.000000,207.379906)}
{pt3dadd(175848.000000,100104.000000,87025.000000,191.464938)}
{pt3dadd(175968.000000,100116.000000,86925.000000,189.776418)}
{pt3dadd(176028.000000,100092.000000,86850.000000,194.846002)}
{pt3dadd(176112.000000,100104.000000,86800.000000,182.786572)}
{pt3dadd(176196.000000,100116.000000,86750.000000,184.648164)}
{pt3dadd(176244.000000,100176.000000,86750.000000,190.810272)}
{pt3dadd(176328.000000,100224.000000,86750.000000,200.140414)}
{pt3dadd(176412.000000,100224.000000,86825.000000,220.667394)}
{pt3dadd(176568.000000,100236.000000,86700.000000,235.102738)}
{pt3dadd(176736.000000,100236.000000,86675.000000,251.017706)}
{pt3dadd(176808.000000,100332.000000,86575.000000,272.625230)}
{pt3dadd(176916.000000,100500.000000,86475.000000,293.203822)}
{pt3dadd(177012.000000,100548.000000,86475.000000,299.124106)}
{pt3dadd(177120.000000,100656.000000,86475.000000,306.988692)}
{pt3dadd(177108.000000,100704.000000,86325.000000,304.369242)}
{pt3dadd(177216.000000,100812.000000,86325.000000,285.024498)}
{pt3dadd(177324.000000,100968.000000,86325.000000,279.104214)}
{pt3dadd(177384.000000,101064.000000,86325.000000,270.433510)}
{pt3dadd(177516.000000,101124.000000,86250.000000,267.683090)}
{pt3dadd(177648.000000,101184.000000,86250.000000,267.683090)}
{pt3dadd(177744.000000,101304.000000,86200.000000,261.212874)}
{pt3dadd(177864.000000,101364.000000,86125.000000,248.709594)}
{pt3dadd(177996.000000,101424.000000,86100.000000,241.219514)}
{pt3dadd(178044.000000,101556.000000,86100.000000,231.466654)}
{pt3dadd(178104.000000,101592.000000,86100.000000,226.596024)}
{pt3dadd(178236.000000,101568.000000,85975.000000,228.648432)}
{pt3dadd(178464.000000,101568.000000,85875.000000,226.493404)}
{pt3dadd(178608.000000,101616.000000,85850.000000,226.493404)}
{pt3dadd(178668.000000,101688.000000,85825.000000,216.696754)}
{pt3dadd(178764.000000,101736.000000,85775.000000,216.696754)}
{pt3dadd(178848.000000,101820.000000,85775.000000,214.644346)}
{pt3dadd(178944.000000,101880.000000,85725.000000,208.775674)}
{pt3dadd(179052.000000,101952.000000,85725.000000,206.512894)}
{pt3dadd(179124.000000,101976.000000,85600.000000,237.917068)}
{pt3dadd(179244.000000,101916.000000,85525.000000,257.261812)}
{pt3dadd(179400.000000,101904.000000,85525.000000,283.076772)}
{pt3dadd(179544.000000,101904.000000,85475.000000,295.739166)}
{pt3dadd(179688.000000,101916.000000,85400.000000,298.001946)}
{pt3dadd(179736.000000,102000.000000,85350.000000,272.186986)}
{pt3dadd(179772.000000,102060.000000,85300.000000,244.417354)}
{pt3dadd(179820.000000,102156.000000,85225.000000,225.072610)}
{pt3dadd(179916.000000,102168.000000,85125.000000,225.072610)}
{pt3dadd(180096.000000,102228.000000,85025.000000,220.654802)}
{pt3dadd(180192.000000,102204.000000,85000.000000,222.707210)}
{pt3dadd(180372.000000,102168.000000,84900.000000,231.132098)}
{pt3dadd(180540.000000,102120.000000,84875.000000,236.002728)}
{pt3dadd(180684.000000,102108.000000,84800.000000,229.209006)}
{pt3dadd(180888.000000,102108.000000,84675.000000,231.364034)}
{pt3dadd(181068.000000,102204.000000,84600.000000,231.364034)}
{pt3dadd(181248.000000,102348.000000,84575.000000,224.893818)}
{pt3dadd(181584.000000,102516.000000,84425.000000,217.760408)}
{pt3dadd(181812.000000,102636.000000,84325.000000,215.708000)}
{pt3dadd(182040.000000,102732.000000,84200.000000,211.500564)}
{pt3dadd(182292.000000,102804.000000,84125.000000,207.493484)}
{pt3dadd(182604.000000,102888.000000,84025.000000,203.677220)}
{pt3dadd(182784.000000,102996.000000,83975.000000,192.192050)}
{pt3dadd(182916.000000,103044.000000,83925.000000,186.602836)}
{pt3dadd(183036.000000,102996.000000,83925.000000,184.648164)}
{pt3dadd(183192.000000,102960.000000,83825.000000,188.655244)}
{pt3dadd(183324.000000,102996.000000,83800.000000,196.678944)}
{pt3dadd(183492.000000,102972.000000,83800.000000,198.367464)}
{pt3dadd(183624.000000,103032.000000,83800.000000,203.956678)}
{pt3dadd(183780.000000,103056.000000,83775.000000,207.963758)}
{pt3dadd(183948.000000,103032.000000,83675.000000,217.252196)}
{pt3dadd(184116.000000,103032.000000,83650.000000,232.643416)}
{pt3dadd(184284.000000,103032.000000,83600.000000,249.573476)}
{pt3dadd(184428.000000,102996.000000,83625.000000,275.707967)}
{pt3dadd(184608.000000,102996.000000,83625.000000,261.944950)}

{create adhoc99}
{access adhoc99}
{connect adhoc99(1), adhoc98(0)}
{nseg = 1}
{strdef color color = "White"}
{pt3dclear()}
{pt3dadd(184608.000000,102996.000000,83625.000000,261.944950)}
{pt3dadd(184716.000000,103128.000000,83600.000000,257.787090)}
{pt3dadd(184836.000000,103212.000000,83600.000000,235.004686)}
{pt3dadd(184980.000000,103296.000000,83600.000000,221.709168)}
{pt3dadd(185088.000000,103356.000000,83600.000000,212.420730)}
{pt3dadd(185208.000000,103380.000000,83575.000000,201.619928)}
{pt3dadd(185328.000000,103452.000000,83575.000000,203.481520)}
{pt3dadd(185460.000000,103452.000000,83550.000000,197.612848)}
{pt3dadd(185628.000000,103488.000000,83525.000000,189.150136)}
{pt3dadd(185736.000000,103548.000000,83500.000000,178.211880)}
{pt3dadd(185880.000000,103584.000000,83475.000000,171.280704)}
{pt3dadd(185988.000000,103620.000000,83425.000000,164.349528)}
{pt3dadd(186096.000000,103692.000000,83400.000000,157.748408)}
{pt3dadd(186216.000000,103728.000000,83425.000000,159.279944)}
{pt3dadd(186312.000000,103776.000000,83375.000000,160.888058)}
{pt3dadd(186432.000000,103860.000000,83375.000000,159.356522)}
{pt3dadd(186552.000000,103920.000000,83350.000000,157.824986)}
{pt3dadd(186660.000000,103956.000000,83325.000000,160.964636)}
{pt3dadd(186756.000000,103980.000000,83300.000000,166.034220)}
{pt3dadd(186852.000000,104028.000000,83300.000000,169.388417)}
{pt3dadd(186948.000000,104112.000000,83300.000000,186.159400)}

{create adhoc100}
{access adhoc100}
{connect adhoc100(1), adhoc99(0)}
{nseg = 1}
{strdef color color = "White"}
{pt3dclear()}
{pt3dadd(186948.000000,104112.000000,83300.000000,186.159400)}
{pt3dadd(187020.000000,104208.000000,83300.000000,205.892673)}
{pt3dadd(187176.000000,104196.000000,83050.000000,216.309544)}
{pt3dadd(187380.000000,104244.000000,82925.000000,226.596024)}
{pt3dadd(187536.000000,104256.000000,82825.000000,230.803460)}
{pt3dadd(187692.000000,104196.000000,82800.000000,243.306740)}
{pt3dadd(187860.000000,104220.000000,82750.000000,241.151712)}
{pt3dadd(187992.000000,104244.000000,82700.000000,241.151712)}
{pt3dadd(188172.000000,104256.000000,82550.000000,248.641792)}
{pt3dadd(188316.000000,104244.000000,82525.000000,250.904572)}
{pt3dadd(188388.000000,104328.000000,82500.000000,238.401292)}
{pt3dadd(188460.000000,104400.000000,82500.000000,240.556320)}
{pt3dadd(188556.000000,104472.000000,82500.000000,240.556320)}
{pt3dadd(188652.000000,104580.000000,82500.000000,228.648432)}
{pt3dadd(188748.000000,104700.000000,82500.000000,214.900482)}
{pt3dadd(188844.000000,104820.000000,82500.000000,208.738374)}
{pt3dadd(189012.000000,105012.000000,82450.000000,200.714674)}
{pt3dadd(189144.000000,105180.000000,82450.000000,190.428194)}
{pt3dadd(189396.000000,105456.000000,82400.000000,186.421114)}
{pt3dadd(189444.000000,105552.000000,82400.000000,197.906284)}
{pt3dadd(189492.000000,105624.000000,82400.000000,196.044692)}
{pt3dadd(189540.000000,105720.000000,82400.000000,190.975108)}
{pt3dadd(189540.000000,105804.000000,82400.000000,190.975108)}
{pt3dadd(189612.000000,105924.000000,82450.000000,194.982188)}
{pt3dadd(189624.000000,106092.000000,82450.000000,188.820080)}
{pt3dadd(189624.000000,106164.000000,82450.000000,190.681672)}
{pt3dadd(189648.000000,106284.000000,82525.000000,193.978306)}
{pt3dadd(189720.000000,106344.000000,82550.000000,192.205356)}
{pt3dadd(189816.000000,106500.000000,82650.000000,181.267100)}
{pt3dadd(189864.000000,106620.000000,82650.000000,181.267100)}
{pt3dadd(189900.000000,106776.000000,82675.000000,175.944038)}
{pt3dadd(189936.000000,106932.000000,82700.000000,174.255518)}
{pt3dadd(190008.000000,107064.000000,82700.000000,172.566998)}
{pt3dadd(190116.000000,107172.000000,82650.000000,175.863632)}
{pt3dadd(190176.000000,107220.000000,82650.000000,177.818304)}
{pt3dadd(190236.000000,107316.000000,82650.000000,181.279774)}
{pt3dadd(190260.000000,107472.000000,82700.000000,186.602836)}
{pt3dadd(190416.000000,107628.000000,82675.000000,202.726700)}
{pt3dadd(190428.000000,107784.000000,82675.000000,227.914570)}
{pt3dadd(190548.000000,107904.000000,82675.000000,244.625286)}
{pt3dadd(190656.000000,107976.000000,82625.000000,280.499890)}
{pt3dadd(190776.000000,108084.000000,82625.000000,288.794300)}

{create adhoc101}
{access adhoc101}
{connect adhoc101(1), adhoc100(0)}
{nseg = 1}
{strdef color color = "White"}
{pt3dclear()}
{pt3dadd(190776.000000,108084.000000,82625.000000,288.794300)}
{pt3dadd(190752.000000,108156.000000,82625.000000,276.540033)}
{pt3dadd(190740.000000,108228.000000,82625.000000,268.938460)}
{pt3dadd(190728.000000,108300.000000,82625.000000,244.950010)}
{pt3dadd(190704.000000,108384.000000,82625.000000,225.214650)}
{pt3dadd(190680.000000,108480.000000,82625.000000,195.198610)}
{pt3dadd(190692.000000,108588.000000,82625.000000,183.713440)}
{pt3dadd(190704.000000,108708.000000,82625.000000,169.055132)}
{pt3dadd(190716.000000,108780.000000,82625.000000,174.378194)}
{pt3dadd(190680.000000,108840.000000,82600.000000,183.827074)}
{pt3dadd(190644.000000,108960.000000,82600.000000,188.655244)}
{pt3dadd(190680.000000,109032.000000,82575.000000,190.343764)}
{pt3dadd(190716.000000,109104.000000,82600.000000,179.405508)}
{pt3dadd(190728.000000,109284.000000,82600.000000,170.942796)}
{pt3dadd(190668.000000,109476.000000,82500.000000,164.341676)}
{pt3dadd(190608.000000,109608.000000,82450.000000,164.341676)}
{pt3dadd(190632.000000,109752.000000,82425.000000,169.930890)}
{pt3dadd(190620.000000,109956.000000,82325.000000,175.000474)}
{pt3dadd(190620.000000,110100.000000,82325.000000,179.828644)}
{pt3dadd(190644.000000,110256.000000,82200.000000,192.298436)}
{pt3dadd(190692.000000,110328.000000,82175.000000,202.095086)}
{pt3dadd(190776.000000,110580.000000,82100.000000,196.505872)}
{pt3dadd(190884.000000,110784.000000,82075.000000,188.446142)}
{pt3dadd(190860.000000,110976.000000,82050.000000,175.844354)}
{pt3dadd(190848.000000,111156.000000,81950.000000,171.837274)}
{pt3dadd(190800.000000,111372.000000,81950.000000,155.753844)}
{pt3dadd(190884.000000,111468.000000,82025.000000,159.388386)}
{pt3dadd(190956.000000,111636.000000,82100.000000,169.309708)}
{pt3dadd(191040.000000,111732.000000,82100.000000,189.553118)}
{pt3dadd(191124.000000,111828.000000,82100.000000,200.353920)}
{pt3dadd(191208.000000,111936.000000,82100.000000,214.282322)}
{pt3dadd(191292.000000,112032.000000,82100.000000,220.444430)}
{pt3dadd(191352.000000,112188.000000,82100.000000,218.582838)}
{pt3dadd(191400.000000,112344.000000,82075.000000,218.582838)}
{pt3dadd(191424.000000,112512.000000,82000.000000,202.458974)}
{pt3dadd(191328.000000,112692.000000,81975.000000,198.451894)}
{pt3dadd(191220.000000,112584.000000,81825.000000,192.289786)}
{pt3dadd(191184.000000,112740.000000,81725.000000,190.516836)}
{pt3dadd(191124.000000,112860.000000,81700.000000,188.464428)}
{pt3dadd(191064.000000,113016.000000,81600.000000,177.551160)}
{pt3dadd(191028.000000,113208.000000,81475.000000,169.088448)}
{pt3dadd(191052.000000,113436.000000,81425.000000,147.051328)}
{pt3dadd(191088.000000,113556.000000,81300.000000,142.223158)}
{pt3dadd(191088.000000,113760.000000,81175.000000,134.945424)}
{pt3dadd(191112.000000,113880.000000,81050.000000,142.719042)}
{pt3dadd(191112.000000,114024.000000,80975.000000,138.548282)}
{pt3dadd(191136.000000,114072.000000,80900.000000,139.401099)}
{pt3dadd(191136.000000,114144.000000,80850.000000,131.627481)}
{pt3dadd(191136.000000,114240.000000,80800.000000,128.487831)}
{pt3dadd(191136.000000,114336.000000,80750.000000,128.487831)}
{pt3dadd(191136.000000,114444.000000,80675.000000,131.199981)}
{pt3dadd(191136.000000,114528.000000,80675.000000,139.750812)}
{pt3dadd(191064.000000,114612.000000,80650.000000,144.676670)}
{pt3dadd(191028.000000,114672.000000,80550.000000,140.505910)}
{pt3dadd(190968.000000,114792.000000,80500.000000,140.505910)}
{pt3dadd(190932.000000,114960.000000,80425.000000,140.505910)}
{pt3dadd(190956.000000,115080.000000,80350.000000,144.676670)}
{pt3dadd(190896.000000,115188.000000,80300.000000,149.055966)}
{pt3dadd(190860.000000,115296.000000,80200.000000,150.378966)}
{pt3dadd(190860.000000,115452.000000,80175.000000,146.208206)}
{pt3dadd(190860.000000,115572.000000,80100.000000,147.666816)}
{pt3dadd(190788.000000,115668.000000,80000.000000,149.198352)}
{pt3dadd(190764.000000,115752.000000,79900.000000,146.208206)}
{pt3dadd(190740.000000,115836.000000,79825.000000,147.597356)}
{pt3dadd(190740.000000,115908.000000,79725.000000,150.309506)}
{pt3dadd(190788.000000,116028.000000,79625.000000,150.309506)}
{pt3dadd(190836.000000,116100.000000,79500.000000,148.777970)}
{pt3dadd(190860.000000,116196.000000,79400.000000,150.236580)}
{pt3dadd(190896.000000,116268.000000,79300.000000,153.153800)}
{pt3dadd(190980.000000,116436.000000,79100.000000,153.153800)}

{create adhoc102}
{access adhoc102}
{connect adhoc102(1), adhoc100(0)}
{nseg = 1}
{strdef color color = "White"}
{pt3dclear()}
{pt3dadd(190776.000000,108084.000000,82625.000000,288.794300)}
{pt3dadd(190896.000000,108108.000000,82400.000000,241.475023)}
{pt3dadd(191028.000000,108132.000000,82350.000000,225.217446)}
{pt3dadd(191136.000000,108120.000000,82300.000000,201.228996)}
{pt3dadd(191220.000000,108132.000000,82275.000000,183.497018)}
{pt3dadd(191304.000000,108108.000000,82300.000000,183.497018)}
{pt3dadd(191424.000000,108156.000000,82275.000000,185.652046)}
{pt3dadd(191520.000000,108288.000000,82250.000000,183.879096)}
{pt3dadd(191544.000000,108396.000000,82175.000000,185.567616)}
{pt3dadd(191604.000000,108480.000000,82100.000000,170.461672)}
{pt3dadd(191724.000000,108576.000000,82075.000000,157.229792)}
{pt3dadd(191880.000000,108768.000000,82025.000000,132.706315)}
{pt3dadd(191964.000000,108972.000000,82000.000000,114.303737)}
{pt3dadd(192048.000000,109116.000000,82000.000000,98.589667)}
{pt3dadd(192144.000000,109272.000000,81950.000000,97.777460)}
{pt3dadd(192180.000000,109344.000000,82000.000000,93.522320)}
{pt3dadd(192264.000000,109440.000000,82000.000000,89.846569)}
{pt3dadd(192264.000000,109524.000000,82000.000000,90.699386)}
{pt3dadd(192360.000000,109728.000000,82000.000000,90.699386)}
{pt3dadd(192372.000000,109860.000000,82025.000000,102.238241)}
{pt3dadd(192432.000000,110016.000000,82000.000000,104.262089)}
{pt3dadd(192540.000000,110244.000000,82025.000000,104.262089)}
{pt3dadd(192636.000000,110412.000000,82075.000000,105.157548)}
{pt3dadd(192720.000000,110556.000000,82125.000000,101.656833)}
{pt3dadd(192804.000000,110736.000000,82225.000000,91.783002)}
{pt3dadd(192840.000000,110892.000000,82350.000000,95.214294)}
{pt3dadd(192900.000000,111360.000000,82525.000000,94.402087)}
{pt3dadd(192972.000000,111504.000000,82525.000000,91.841605)}
{pt3dadd(193008.000000,111600.000000,82575.000000,91.841605)}
{pt3dadd(193116.000000,111708.000000,82575.000000,90.176581)}
{pt3dadd(193224.000000,111852.000000,82575.000000,83.781209)}
{pt3dadd(193284.000000,111888.000000,82575.000000,86.341692)}
{pt3dadd(193344.000000,111948.000000,82575.000000,88.902174)}
{pt3dadd(193404.000000,112008.000000,82575.000000,89.714381)}
{pt3dadd(193440.000000,112092.000000,82575.000000,94.202339)}
{pt3dadd(193536.000000,112116.000000,82550.000000,99.397711)}
{pt3dadd(193548.000000,112188.000000,82550.000000,96.837228)}
{pt3dadd(193656.000000,112296.000000,82450.000000,95.088952)}
{pt3dadd(193728.000000,112344.000000,82400.000000,95.500829)}
{pt3dadd(193896.000000,112440.000000,82200.000000,85.281760)}

{create adhoc103}
{access adhoc103}
{connect adhoc103(1), adhoc99(0)}
{nseg = 1}
{strdef color color = "White"}
{pt3dclear()}
{pt3dadd(186948.000000,104112.000000,83300.000000,186.159400)}
{pt3dadd(186828.000000,104196.000000,83525.000000,120.329002)}
{pt3dadd(186780.000000,104316.000000,83700.000000,85.281760)}

{create adhoc104}
{access adhoc104}
{connect adhoc104(1), adhoc98(0)}
{nseg = 1}
{strdef color color = "White"}
{pt3dclear()}
{pt3dadd(184608.000000,102996.000000,83625.000000,261.944950)}
{pt3dadd(184620.000000,102900.000000,83600.000000,209.183472)}
{pt3dadd(184692.000000,102732.000000,83600.000000,181.076083)}
{pt3dadd(184656.000000,102612.000000,83675.000000,164.146023)}
{pt3dadd(184656.000000,102468.000000,83675.000000,138.217033)}
{pt3dadd(184668.000000,102324.000000,83675.000000,178.131730)}
{pt3dadd(184656.000000,102168.000000,83675.000000,168.257899)}
{pt3dadd(184692.000000,102036.000000,83725.000000,166.934899)}
{pt3dadd(184680.000000,101940.000000,83725.000000,153.244677)}
{pt3dadd(184680.000000,101844.000000,83775.000000,153.244677)}
{pt3dadd(184680.000000,101700.000000,83800.000000,117.797877)}
{pt3dadd(184704.000000,101544.000000,83800.000000,135.347638)}
{pt3dadd(184680.000000,101448.000000,83800.000000,129.619741)}
{pt3dadd(184680.000000,101328.000000,83800.000000,131.851033)}
{pt3dadd(184668.000000,101196.000000,83800.000000,148.491585)}
{pt3dadd(184668.000000,101064.000000,83800.000000,164.339729)}
{pt3dadd(184752.000000,100920.000000,83800.000000,167.974271)}
{pt3dadd(184812.000000,100812.000000,83800.000000,188.290312)}
{pt3dadd(184884.000000,100680.000000,83850.000000,201.982933)}
{pt3dadd(184908.000000,100548.000000,83875.000000,205.240720)}

{create adhoc105}
{access adhoc105}
{connect adhoc105(1), adhoc104(0)}
{nseg = 1}
{strdef color color = "White"}
{pt3dclear()}
{pt3dadd(184908.000000,100548.000000,83875.000000,205.240720)}
{pt3dadd(184992.000000,100572.000000,83950.000000,129.603235)}
{pt3dadd(185136.000000,100644.000000,83950.000000,109.476700)}
{pt3dadd(185220.000000,100680.000000,83975.000000,86.337725)}
{pt3dadd(185292.000000,100668.000000,83975.000000,82.706547)}
{pt3dadd(185340.000000,100704.000000,84025.000000,89.545845)}

{create adhoc106}
{access adhoc106}
{connect adhoc106(1), adhoc104(0)}
{nseg = 1}
{strdef color color = "White"}
{pt3dclear()}
{pt3dadd(184908.000000,100548.000000,83875.000000,205.240720)}
{pt3dadd(184812.000000,100476.000000,83950.000000,142.362188)}
{pt3dadd(184740.000000,100416.000000,83950.000000,130.833608)}
{pt3dadd(184680.000000,100332.000000,83925.000000,109.530324)}
{pt3dadd(184596.000000,100248.000000,84050.000000,118.081155)}
{pt3dadd(184572.000000,100200.000000,84075.000000,120.793305)}
{pt3dadd(184524.000000,100164.000000,84125.000000,129.749160)}
{pt3dadd(184440.000000,100044.000000,84225.000000,129.749160)}
{pt3dadd(184380.000000,99984.000000,84275.000000,147.236180)}
{pt3dadd(184296.000000,99744.000000,84350.000000,151.406940)}
{pt3dadd(184248.000000,99660.000000,84425.000000,156.005200)}
{pt3dadd(184200.000000,99576.000000,84400.000000,173.905752)}
{pt3dadd(184104.000000,99456.000000,84450.000000,185.781746)}
{pt3dadd(184080.000000,99288.000000,84475.000000,198.444140)}
{pt3dadd(184068.000000,99120.000000,84550.000000,220.202370)}
{pt3dadd(184296.000000,99168.000000,84800.000000,247.078760)}
{pt3dadd(184536.000000,99168.000000,84950.000000,261.737068)}
{pt3dadd(184656.000000,99156.000000,84975.000000,275.697364)}
{pt3dadd(184836.000000,99120.000000,85175.000000,263.034970)}
{pt3dadd(184932.000000,99180.000000,85100.000000,247.877860)}
{pt3dadd(185052.000000,99360.000000,85050.000000,215.014060)}
{pt3dadd(185184.000000,99444.000000,85075.000000,170.411267)}
{pt3dadd(185256.000000,99480.000000,85125.000000,138.915000)}

{create adhoc107}
{access adhoc107}
{connect adhoc107(1), adhoc17(0)}
{nseg = 1}
{strdef color color = "White"}
{pt3dclear()}
{pt3dadd(171924.000000,99096.000000,77825.000000,600.382600)}
{pt3dadd(172092.000000,99024.000000,78025.000000,821.054533)}
{pt3dadd(172224.000000,99036.000000,78025.000000,874.502820)}
{pt3dadd(172344.000000,99048.000000,78025.000000,940.704400)}
{pt3dadd(172476.000000,99084.000000,78025.000000,907.677752)}
{pt3dadd(172596.000000,99156.000000,78025.000000,898.807372)}
{pt3dadd(172728.000000,99252.000000,78025.000000,880.623092)}
{pt3dadd(172860.000000,99360.000000,78025.000000,880.623092)}
{pt3dadd(172980.000000,99456.000000,78025.000000,871.752712)}
{pt3dadd(173124.000000,99480.000000,77925.000000,768.395534)}
{pt3dadd(173280.000000,99516.000000,77925.000000,636.243394)}
{pt3dadd(173412.000000,99540.000000,77800.000000,499.883818)}
{pt3dadd(173556.000000,99564.000000,77800.000000,371.364578)}
{pt3dadd(173712.000000,99600.000000,77725.000000,248.965298)}
{pt3dadd(173868.000000,99624.000000,77725.000000,251.460014)}
{pt3dadd(173988.000000,99612.000000,77600.000000,261.212874)}
{pt3dadd(174072.000000,99624.000000,77525.000000,275.173170)}
{pt3dadd(174144.000000,99648.000000,77525.000000,267.308584)}
{pt3dadd(174252.000000,99648.000000,77475.000000,259.818504)}
{pt3dadd(174360.000000,99684.000000,77425.000000,265.188374)}
{pt3dadd(174480.000000,99708.000000,77425.000000,277.043038)}
{pt3dadd(174612.000000,99720.000000,77425.000000,279.793458)}
{pt3dadd(174720.000000,99756.000000,77325.000000,282.288174)}
{pt3dadd(174828.000000,99816.000000,77275.000000,295.416614)}
{pt3dadd(174936.000000,99876.000000,77225.000000,301.336898)}
{pt3dadd(175044.000000,99936.000000,77225.000000,301.336898)}
{pt3dadd(175164.000000,99936.000000,77225.000000,307.257182)}
{pt3dadd(175272.000000,99984.000000,77175.000000,312.627052)}
{pt3dadd(175404.000000,100056.000000,77075.000000,304.369242)}
{pt3dadd(175584.000000,100116.000000,77075.000000,293.079088)}
{pt3dadd(175704.000000,100200.000000,77125.000000,276.110258)}
{pt3dadd(175836.000000,100284.000000,77050.000000,259.949474)}
{pt3dadd(175992.000000,100368.000000,77050.000000,249.708974)}
{pt3dadd(176160.000000,100404.000000,77000.000000,242.575564)}
{pt3dadd(176328.000000,100440.000000,77000.000000,233.287126)}
{pt3dadd(176496.000000,100488.000000,76950.000000,228.648432)}
{pt3dadd(176604.000000,100524.000000,76950.000000,222.178216)}
{pt3dadd(176748.000000,100560.000000,76950.000000,224.554130)}
{pt3dadd(176904.000000,100608.000000,76950.000000,234.306990)}
{pt3dadd(177048.000000,100644.000000,76950.000000,246.214878)}
{pt3dadd(177108.000000,100692.000000,76875.000000,255.967738)}
{pt3dadd(177240.000000,100740.000000,76775.000000,264.813868)}
{pt3dadd(177396.000000,100812.000000,76775.000000,264.813868)}
{pt3dadd(177564.000000,100896.000000,76775.000000,267.564288)}
{pt3dadd(177744.000000,100920.000000,76775.000000,262.450122)}
{pt3dadd(177816.000000,100956.000000,76750.000000,254.960042)}
{pt3dadd(177876.000000,101028.000000,76725.000000,252.584128)}
{pt3dadd(177972.000000,101112.000000,76725.000000,260.448714)}
{pt3dadd(178080.000000,101184.000000,76725.000000,257.698294)}
{pt3dadd(178188.000000,101220.000000,76725.000000,265.562880)}
{pt3dadd(178332.000000,101268.000000,76675.000000,273.052960)}
{pt3dadd(178476.000000,101316.000000,76675.000000,289.213744)}
{pt3dadd(178620.000000,101352.000000,76675.000000,295.134028)}
{pt3dadd(178752.000000,101400.000000,76575.000000,290.019862)}
{pt3dadd(178884.000000,101460.000000,76500.000000,282.155276)}
{pt3dadd(179016.000000,101508.000000,76450.000000,279.535826)}
{pt3dadd(179148.000000,101556.000000,76425.000000,265.750956)}
{pt3dadd(179304.000000,101616.000000,76475.000000,262.718612)}
{pt3dadd(179436.000000,101664.000000,76475.000000,270.583198)}
{pt3dadd(179568.000000,101724.000000,76475.000000,298.091324)}
{pt3dadd(179640.000000,101748.000000,76475.000000,312.565438)}
{pt3dadd(179736.000000,101784.000000,76475.000000,336.387736)}
{pt3dadd(179892.000000,101832.000000,76475.000000,361.077082)}
{pt3dadd(180036.000000,101868.000000,76475.000000,397.401322)}
{pt3dadd(180192.000000,101904.000000,76475.000000,405.335068)}
{pt3dadd(180372.000000,101940.000000,76500.000000,405.335068)}
{pt3dadd(180492.000000,102000.000000,76575.000000,401.824752)}
{pt3dadd(180624.000000,102060.000000,76625.000000,397.761122)}
{pt3dadd(180708.000000,102132.000000,76675.000000,370.541126)}
{pt3dadd(180804.000000,102204.000000,76750.000000,345.851780)}
{pt3dadd(180900.000000,102264.000000,76850.000000,345.851780)}
{pt3dadd(181008.000000,102324.000000,76850.000000,323.163884)}
{pt3dadd(181140.000000,102360.000000,76850.000000,282.939512)}
{pt3dadd(181260.000000,102396.000000,76850.000000,257.124552)}
{pt3dadd(181392.000000,102456.000000,76900.000000,251.486192)}
{pt3dadd(181512.000000,102516.000000,76900.000000,248.302232)}
{pt3dadd(181632.000000,102552.000000,76900.000000,258.542732)}
{pt3dadd(181752.000000,102588.000000,76925.000000,287.700844)}
{pt3dadd(181884.000000,102648.000000,76925.000000,316.858956)}
{pt3dadd(182016.000000,102696.000000,77000.000000,335.567088)}
{pt3dadd(182100.000000,102732.000000,77050.000000,353.160460)}
{pt3dadd(182196.000000,102768.000000,77050.000000,375.325573)}
{pt3dadd(182304.000000,102804.000000,77050.000000,406.362580)}

{create adhoc108}
{access adhoc108}
{connect adhoc108(1), adhoc107(0)}
{nseg = 1}
{strdef color color = "White"}
{pt3dclear()}
{pt3dadd(182304.000000,102804.000000,77050.000000,406.362580)}
{pt3dadd(182256.000000,102888.000000,77150.000000,382.346893)}
{pt3dadd(182208.000000,102984.000000,77200.000000,366.477496)}
{pt3dadd(182184.000000,103116.000000,77200.000000,314.377130)}
{pt3dadd(182196.000000,103212.000000,77250.000000,266.875024)}
{pt3dadd(182268.000000,103332.000000,77350.000000,233.782330)}
{pt3dadd(182340.000000,103428.000000,77425.000000,197.549986)}
{pt3dadd(182364.000000,103536.000000,77500.000000,162.802660)}
{pt3dadd(182400.000000,103656.000000,77500.000000,169.089440)}
{pt3dadd(182400.000000,103788.000000,77575.000000,165.949790)}
{pt3dadd(182412.000000,103920.000000,77575.000000,167.638310)}
{pt3dadd(182436.000000,104064.000000,77650.000000,174.239430)}
{pt3dadd(182424.000000,104148.000000,77700.000000,176.012380)}
{pt3dadd(182460.000000,104292.000000,77700.000000,179.646922)}
{pt3dadd(182460.000000,104376.000000,77700.000000,186.248042)}
{pt3dadd(182448.000000,104472.000000,77750.000000,188.020992)}
{pt3dadd(182448.000000,104568.000000,77800.000000,191.837256)}
{pt3dadd(182448.000000,104664.000000,77800.000000,190.064306)}
{pt3dadd(182448.000000,104760.000000,77850.000000,183.133130)}
{pt3dadd(182448.000000,104844.000000,77850.000000,184.994722)}
{pt3dadd(182448.000000,104952.000000,77850.000000,193.018422)}
{pt3dadd(182436.000000,105048.000000,77950.000000,191.063750)}
{pt3dadd(182376.000000,105096.000000,77975.000000,203.123180)}
{pt3dadd(182328.000000,105168.000000,78050.000000,220.855158)}
{pt3dadd(182280.000000,105252.000000,78050.000000,224.862238)}
{pt3dadd(182268.000000,105336.000000,78075.000000,231.995648)}
{pt3dadd(182256.000000,105420.000000,78125.000000,236.002728)}
{pt3dadd(182208.000000,105492.000000,78125.000000,231.584920)}
{pt3dadd(182148.000000,105588.000000,78125.000000,231.584920)}
{pt3dadd(182100.000000,105684.000000,78125.000000,231.584920)}
{pt3dadd(182064.000000,105780.000000,78125.000000,236.954790)}
{pt3dadd(182040.000000,105876.000000,78200.000000,257.533382)}
{pt3dadd(181980.000000,105948.000000,78275.000000,288.149402)}
{pt3dadd(181920.000000,106020.000000,78275.000000,301.934272)}
{pt3dadd(181848.000000,106092.000000,78275.000000,308.727994)}
{pt3dadd(181776.000000,106164.000000,78275.000000,294.069686)}
{pt3dadd(181716.000000,106248.000000,78300.000000,269.484014)}
{pt3dadd(181644.000000,106320.000000,78300.000000,241.023022)}
{pt3dadd(181584.000000,106404.000000,78300.000000,214.575758)}
{pt3dadd(181560.000000,106500.000000,78350.000000,198.451894)}
{pt3dadd(181560.000000,106608.000000,78400.000000,189.121752)}
{pt3dadd(181524.000000,106728.000000,78400.000000,189.121752)}
{pt3dadd(181500.000000,106860.000000,78400.000000,182.959644)}
{pt3dadd(181500.000000,106956.000000,78475.000000,181.186694)}
{pt3dadd(181500.000000,107064.000000,78475.000000,188.464428)}
{pt3dadd(181488.000000,107184.000000,78475.000000,197.794570)}
{pt3dadd(181524.000000,107292.000000,78475.000000,189.331858)}
{pt3dadd(181560.000000,107412.000000,78475.000000,180.869146)}
{pt3dadd(181608.000000,107532.000000,78475.000000,177.572512)}
{pt3dadd(181620.000000,107616.000000,78400.000000,164.307368)}
{pt3dadd(181620.000000,107700.000000,78400.000000,148.989816)}
{pt3dadd(181632.000000,107796.000000,78400.000000,159.407200)}
{pt3dadd(181680.000000,107880.000000,78400.000000,166.008320)}
{pt3dadd(181716.000000,107964.000000,78400.000000,169.304954)}
{pt3dadd(181764.000000,108060.000000,78350.000000,170.694104)}
{pt3dadd(181752.000000,108156.000000,78300.000000,178.370034)}
{pt3dadd(181740.000000,108240.000000,78250.000000,178.370034)}
{pt3dadd(181740.000000,108336.000000,78200.000000,180.231626)}
{pt3dadd(181752.000000,108444.000000,78100.000000,187.873248)}
{pt3dadd(181764.000000,108540.000000,78050.000000,206.219458)}
{pt3dadd(181752.000000,108624.000000,77950.000000,213.861080)}
{pt3dadd(181716.000000,108708.000000,77825.000000,208.271866)}
{pt3dadd(181704.000000,108804.000000,77775.000000,208.271866)}
{pt3dadd(181680.000000,108876.000000,77675.000000,202.403194)}
{pt3dadd(181680.000000,108960.000000,77550.000000,192.116714)}
{pt3dadd(181668.000000,109068.000000,77500.000000,192.116714)}
{pt3dadd(181656.000000,109176.000000,77450.000000,204.176144)}
{pt3dadd(181632.000000,109272.000000,77350.000000,214.976946)}
{pt3dadd(181656.000000,109380.000000,77250.000000,225.263426)}
{pt3dadd(181668.000000,109488.000000,77200.000000,229.079690)}
{pt3dadd(181680.000000,109596.000000,77150.000000,223.211018)}
{pt3dadd(181704.000000,109740.000000,77100.000000,220.948238)}
{pt3dadd(181704.000000,109836.000000,77050.000000,208.285844)}
{pt3dadd(181704.000000,109932.000000,77025.000000,210.661758)}
{pt3dadd(181704.000000,110040.000000,77025.000000,219.507888)}
{pt3dadd(181704.000000,110136.000000,76975.000000,229.794368)}
{pt3dadd(181704.000000,110256.000000,76925.000000,236.927778)}
{pt3dadd(181704.000000,110364.000000,76925.000000,242.796450)}
{pt3dadd(181716.000000,110484.000000,76925.000000,245.291166)}
{pt3dadd(181728.000000,110592.000000,76925.000000,256.043692)}
{pt3dadd(181728.000000,110712.000000,76825.000000,269.172132)}
{pt3dadd(181728.000000,110820.000000,76825.000000,277.429942)}
{pt3dadd(181716.000000,110916.000000,76775.000000,284.223664)}
{pt3dadd(181704.000000,111012.000000,76700.000000,286.843114)}
{pt3dadd(181716.000000,111108.000000,76600.000000,286.843114)}
{pt3dadd(181752.000000,111216.000000,76650.000000,273.714674)}
{pt3dadd(181764.000000,111336.000000,76650.000000,270.826734)}
{pt3dadd(181764.000000,111456.000000,76600.000000,273.321450)}
{pt3dadd(181752.000000,111576.000000,76525.000000,276.071870)}
{pt3dadd(181740.000000,111696.000000,76475.000000,273.183930)}
{pt3dadd(181716.000000,111804.000000,76425.000000,268.766122)}
{pt3dadd(181680.000000,111900.000000,76400.000000,258.525622)}
{pt3dadd(181632.000000,112020.000000,76325.000000,245.230104)}
{pt3dadd(181596.000000,112152.000000,76275.000000,226.564716)}
{pt3dadd(181620.000000,112260.000000,76200.000000,207.899328)}
{pt3dadd(181656.000000,112332.000000,76050.000000,185.530879)}
{pt3dadd(181692.000000,112476.000000,76000.000000,165.795519)}
{pt3dadd(181776.000000,112632.000000,75875.000000,165.795519)}
{pt3dadd(181860.000000,112632.000000,75750.000000,174.220407)}
{pt3dadd(181836.000000,112704.000000,75525.000000,190.658053)}
{pt3dadd(181836.000000,112704.000000,75275.000000,237.591800)}

{create adhoc109}
{access adhoc109}
{connect adhoc109(1), adhoc107(0)}
{nseg = 1}
{strdef color color = "White"}
{pt3dclear()}
{pt3dadd(182304.000000,102804.000000,77050.000000,406.362580)}
{pt3dadd(182412.000000,102840.000000,77000.000000,272.933293)}
{pt3dadd(182520.000000,102864.000000,77000.000000,252.116108)}
{pt3dadd(182628.000000,102888.000000,77000.000000,211.891736)}
{pt3dadd(182736.000000,102924.000000,77000.000000,217.760408)}
{pt3dadd(182844.000000,102972.000000,77000.000000,213.552972)}
{pt3dadd(182952.000000,103032.000000,77000.000000,231.099220)}
{pt3dadd(183084.000000,103092.000000,77000.000000,231.099220)}
{pt3dadd(183216.000000,103128.000000,77000.000000,229.144548)}
{pt3dadd(183336.000000,103188.000000,77025.000000,221.502926)}
{pt3dadd(183432.000000,103236.000000,77025.000000,217.686662)}
{pt3dadd(183612.000000,103308.000000,76975.000000,200.140414)}
{pt3dadd(183780.000000,103356.000000,76975.000000,204.779108)}
{pt3dadd(183960.000000,103392.000000,76975.000000,213.203996)}
{pt3dadd(184080.000000,103452.000000,76875.000000,238.391866)}
{pt3dadd(184188.000000,103488.000000,76825.000000,253.548976)}
{pt3dadd(184344.000000,103536.000000,76825.000000,280.654680)}
{pt3dadd(184488.000000,103608.000000,76825.000000,300.966662)}
{pt3dadd(184560.000000,103644.000000,76650.000000,305.837292)}
{pt3dadd(184656.000000,103656.000000,76600.000000,302.949352)}
{pt3dadd(184740.000000,103668.000000,76525.000000,317.423466)}
{pt3dadd(184836.000000,103680.000000,76450.000000,297.111484)}
{pt3dadd(184956.000000,103692.000000,76400.000000,270.005780)}
{pt3dadd(185064.000000,103728.000000,76400.000000,281.295934)}
{pt3dadd(185184.000000,103764.000000,76325.000000,287.216218)}
{pt3dadd(185268.000000,103812.000000,76225.000000,290.559370)}
{pt3dadd(185364.000000,103872.000000,76175.000000,293.054086)}
{pt3dadd(185472.000000,103932.000000,76125.000000,304.961974)}
{pt3dadd(185580.000000,103980.000000,76125.000000,308.145934)}
{pt3dadd(185700.000000,104004.000000,76125.000000,311.329894)}
{pt3dadd(185784.000000,104076.000000,76050.000000,293.512628)}
{pt3dadd(185880.000000,104124.000000,76050.000000,286.379218)}
{pt3dadd(186000.000000,104136.000000,76050.000000,283.759768)}
{pt3dadd(186120.000000,104148.000000,76050.000000,269.285654)}
{pt3dadd(186180.000000,104196.000000,75975.000000,252.316824)}
{pt3dadd(186252.000000,104280.000000,75975.000000,247.446194)}
{pt3dadd(186336.000000,104352.000000,75975.000000,254.579604)}
{pt3dadd(186444.000000,104424.000000,75950.000000,257.199054)}
{pt3dadd(186600.000000,104532.000000,75925.000000,254.704338)}
{pt3dadd(186636.000000,104628.000000,75925.000000,242.041944)}
{pt3dadd(186744.000000,104700.000000,75925.000000,249.532024)}
{pt3dadd(186828.000000,104796.000000,75925.000000,242.398614)}
{pt3dadd(186924.000000,104892.000000,75900.000000,234.908534)}
{pt3dadd(186948.000000,104940.000000,75950.000000,228.114812)}
{pt3dadd(186996.000000,104988.000000,76025.000000,240.777206)}
{pt3dadd(187044.000000,105036.000000,76075.000000,217.931062)}
{pt3dadd(187116.000000,105084.000000,76150.000000,222.569756)}
{pt3dadd(187200.000000,105120.000000,76200.000000,224.945670)}
{pt3dadd(187260.000000,105168.000000,76275.000000,220.938590)}
{pt3dadd(187296.000000,105240.000000,76325.000000,216.299896)}
{pt3dadd(187320.000000,105312.000000,76325.000000,244.784400)}
{pt3dadd(187380.000000,105396.000000,76325.000000,235.938270)}
{pt3dadd(187416.000000,105480.000000,76350.000000,231.299576)}
{pt3dadd(187464.000000,105552.000000,76450.000000,265.922676)}
{pt3dadd(187512.000000,105624.000000,76525.000000,310.270050)}
{pt3dadd(187560.000000,105708.000000,76525.000000,299.517524)}
{pt3dadd(187620.000000,105792.000000,76650.000000,313.477820)}
{pt3dadd(187680.000000,105888.000000,76650.000000,320.611230)}
{pt3dadd(187716.000000,105996.000000,76750.000000,310.573802)}
{pt3dadd(187728.000000,106104.000000,76825.000000,264.071400)}
{pt3dadd(187776.000000,106212.000000,76875.000000,261.695486)}
{pt3dadd(187824.000000,106308.000000,76875.000000,254.205406)}
{pt3dadd(187872.000000,106404.000000,76950.000000,251.710690)}
{pt3dadd(187908.000000,106512.000000,77025.000000,240.420536)}
{pt3dadd(187968.000000,106620.000000,77075.000000,240.420536)}
{pt3dadd(188016.000000,106728.000000,77075.000000,230.134056)}
{pt3dadd(188052.000000,106860.000000,77100.000000,223.663840)}
{pt3dadd(188076.000000,106992.000000,77100.000000,240.632670)}
{pt3dadd(188136.000000,107088.000000,77200.000000,223.702610)}
{pt3dadd(188196.000000,107172.000000,77250.000000,217.833938)}
{pt3dadd(188256.000000,107268.000000,77275.000000,223.702610)}
{pt3dadd(188316.000000,107364.000000,77275.000000,223.702610)}
{pt3dadd(188376.000000,107460.000000,77275.000000,204.357866)}
{pt3dadd(188436.000000,107556.000000,77325.000000,214.154516)}
{pt3dadd(188496.000000,107628.000000,77325.000000,217.970780)}
{pt3dadd(188508.000000,107700.000000,77325.000000,213.963700)}
{pt3dadd(188532.000000,107772.000000,77325.000000,212.009028)}
{pt3dadd(188556.000000,107832.000000,77375.000000,203.584140)}
{pt3dadd(188604.000000,107904.000000,77400.000000,197.422032)}
{pt3dadd(188652.000000,107988.000000,77400.000000,191.832818)}
{pt3dadd(188712.000000,108060.000000,77400.000000,197.994926)}
{pt3dadd(188748.000000,108132.000000,77400.000000,204.157034)}
{pt3dadd(188772.000000,108204.000000,77400.000000,206.111706)}
{pt3dadd(188808.000000,108264.000000,77400.000000,202.477164)}
{pt3dadd(188832.000000,108336.000000,77400.000000,194.801234)}
{pt3dadd(188904.000000,108420.000000,77375.000000,178.717804)}
{pt3dadd(188928.000000,108516.000000,77375.000000,172.555696)}
{pt3dadd(188952.000000,108600.000000,77375.000000,172.555696)}
{pt3dadd(188964.000000,108696.000000,77375.000000,170.867176)}
{pt3dadd(188988.000000,108792.000000,77375.000000,182.177648)}
{pt3dadd(188988.000000,108864.000000,77375.000000,190.237378)}
{pt3dadd(189012.000000,108948.000000,77375.000000,190.237378)}
{pt3dadd(189024.000000,109032.000000,77300.000000,182.959644)}
{pt3dadd(189036.000000,109128.000000,77300.000000,184.648164)}
{pt3dadd(189060.000000,109212.000000,77300.000000,174.726842)}
{pt3dadd(189072.000000,109296.000000,77300.000000,174.726842)}
{pt3dadd(189084.000000,109392.000000,77300.000000,174.726842)}
{pt3dadd(189096.000000,109464.000000,77300.000000,180.049904)}
{pt3dadd(189108.000000,109548.000000,77300.000000,185.639118)}
{pt3dadd(189144.000000,109608.000000,77275.000000,197.515112)}
{pt3dadd(189180.000000,109680.000000,77275.000000,195.742162)}
{pt3dadd(189228.000000,109752.000000,77175.000000,193.880570)}
{pt3dadd(189276.000000,109824.000000,77150.000000,193.880570)}
{pt3dadd(189324.000000,109896.000000,77150.000000,207.840866)}
{pt3dadd(189384.000000,109980.000000,77150.000000,219.181712)}
{pt3dadd(189432.000000,110052.000000,77150.000000,226.823334)}
{pt3dadd(189492.000000,110124.000000,77150.000000,244.599894)}
{pt3dadd(189540.000000,110196.000000,77150.000000,250.762002)}
{pt3dadd(189600.000000,110244.000000,77125.000000,238.854114)}
{pt3dadd(189648.000000,110328.000000,77125.000000,223.697004)}
{pt3dadd(189684.000000,110388.000000,77125.000000,221.644596)}
{pt3dadd(189732.000000,110472.000000,77075.000000,219.025146)}
{pt3dadd(189792.000000,110544.000000,77075.000000,212.863038)}
{pt3dadd(189840.000000,110616.000000,77075.000000,208.855958)}
{pt3dadd(189900.000000,110700.000000,77075.000000,210.717550)}
{pt3dadd(189960.000000,110784.000000,77075.000000,217.187766)}
{pt3dadd(190008.000000,110868.000000,77075.000000,210.054356)}
{pt3dadd(190068.000000,110940.000000,77075.000000,223.349874)}
{pt3dadd(190092.000000,110988.000000,77000.000000,229.511982)}
{pt3dadd(190116.000000,111072.000000,77000.000000,237.936870)}
{pt3dadd(190140.000000,111144.000000,77000.000000,237.936870)}
{pt3dadd(190188.000000,111228.000000,77000.000000,245.070280)}
{pt3dadd(190236.000000,111288.000000,76975.000000,237.936870)}
{pt3dadd(190284.000000,111348.000000,76900.000000,235.781842)}
{pt3dadd(190344.000000,111408.000000,76900.000000,229.311626)}
{pt3dadd(190404.000000,111468.000000,76900.000000,227.048846)}
{pt3dadd(190464.000000,111528.000000,76900.000000,213.753328)}
{pt3dadd(190524.000000,111600.000000,76900.000000,205.729628)}
{pt3dadd(190584.000000,111672.000000,76900.000000,198.088006)}
{pt3dadd(190644.000000,111768.000000,76825.000000,194.271742)}
{pt3dadd(190704.000000,111876.000000,76800.000000,188.109634)}
{pt3dadd(190752.000000,111972.000000,76775.000000,194.271742)}
{pt3dadd(190812.000000,112044.000000,76750.000000,192.498792)}
{pt3dadd(190884.000000,112116.000000,76750.000000,200.140414)}
{pt3dadd(190956.000000,112176.000000,76650.000000,206.009086)}
{pt3dadd(191028.000000,112248.000000,76600.000000,212.171194)}
{pt3dadd(191100.000000,112320.000000,76500.000000,244.318014)}
{pt3dadd(191172.000000,112392.000000,76500.000000,242.629494)}
{pt3dadd(191208.000000,112488.000000,76475.000000,240.577086)}
{pt3dadd(191292.000000,112572.000000,76475.000000,242.732114)}
{pt3dadd(191340.000000,112644.000000,76450.000000,236.570006)}
{pt3dadd(191424.000000,112728.000000,76425.000000,198.261078)}
{pt3dadd(191460.000000,112824.000000,76375.000000,205.538812)}
{pt3dadd(191556.000000,112884.000000,76350.000000,196.652964)}
{pt3dadd(191652.000000,112968.000000,76300.000000,192.445528)}
{pt3dadd(191724.000000,113076.000000,76300.000000,196.452608)}
{pt3dadd(191760.000000,113136.000000,76300.000000,198.407280)}
{pt3dadd(191808.000000,113184.000000,76300.000000,204.877496)}
{pt3dadd(191844.000000,113220.000000,76200.000000,225.104190)}
{pt3dadd(191904.000000,113244.000000,76175.000000,236.445036)}
{pt3dadd(191940.000000,113328.000000,76150.000000,240.862844)}
{pt3dadd(191988.000000,113472.000000,76100.000000,249.708974)}
{pt3dadd(191976.000000,113580.000000,76125.000000,262.837414)}
{pt3dadd(192000.000000,113700.000000,76100.000000,274.127568)}
{pt3dadd(192012.000000,113808.000000,75975.000000,291.944834)}
{pt3dadd(192060.000000,113928.000000,75875.000000,325.698990)}
{pt3dadd(192144.000000,113988.000000,75825.000000,346.010972)}
{pt3dadd(192120.000000,114036.000000,75700.000000,349.043316)}
{pt3dadd(192084.000000,114120.000000,75575.000000,335.258446)}
{pt3dadd(192048.000000,114168.000000,75475.000000,328.731334)}
{pt3dadd(192036.000000,114276.000000,75325.000000,297.353092)}
{pt3dadd(192204.000000,114492.000000,75325.000000,297.353092)}
{pt3dadd(192444.000000,114900.000000,75175.000000,286.062938)}
{pt3dadd(192396.000000,115212.000000,74925.000000,273.400544)}
{pt3dadd(192408.000000,115620.000000,74750.000000,254.976980)}
{pt3dadd(192396.000000,116304.000000,74650.000000,246.130850)}
{pt3dadd(192480.000000,117000.000000,74475.000000,216.972738)}
{pt3dadd(192456.000000,117180.000000,74375.000000,200.042678)}
{pt3dadd(192504.000000,117312.000000,74250.000000,200.042678)}
{pt3dadd(192600.000000,117444.000000,74150.000000,207.176088)}
{pt3dadd(192648.000000,117576.000000,74125.000000,226.774744)}
{pt3dadd(192660.000000,117756.000000,74025.000000,207.495308)}
{pt3dadd(192552.000000,118044.000000,73650.000000,193.805086)}
{pt3dadd(192288.000000,118272.000000,73425.000000,177.305309)}
{pt3dadd(192132.000000,118344.000000,73225.000000,162.148199)}
{pt3dadd(192036.000000,118656.000000,72975.000000,136.960329)}
{pt3dadd(191916.000000,118704.000000,72850.000000,152.423501)}
{pt3dadd(191868.000000,118932.000000,72750.000000,154.654793)}
{pt3dadd(191796.000000,119124.000000,72600.000000,161.705690)}
{pt3dadd(191700.000000,119352.000000,72375.000000,142.382979)}
{pt3dadd(191628.000000,119532.000000,72225.000000,125.728677)}
{pt3dadd(191448.000000,119748.000000,72025.000000,122.267207)}
{pt3dadd(191484.000000,120096.000000,72050.000000,128.897967)}
{pt3dadd(191640.000000,120192.000000,72050.000000,133.277263)}
{pt3dadd(191700.000000,120432.000000,71875.000000,145.998854)}
{pt3dadd(191676.000000,120744.000000,71750.000000,154.977226)}
{pt3dadd(191784.000000,121032.000000,71925.000000,164.307368)}
{pt3dadd(191856.000000,121452.000000,71550.000000,164.307368)}
{pt3dadd(191940.000000,121896.000000,71400.000000,159.928072)}
{pt3dadd(192036.000000,122280.000000,71400.000000,164.756242)}
{pt3dadd(192108.000000,122700.000000,71400.000000,160.973242)}
{pt3dadd(192156.000000,123120.000000,71300.000000,158.920834)}
{pt3dadd(192240.000000,123492.000000,71200.000000,167.511790)}
{pt3dadd(192396.000000,123756.000000,71075.000000,205.240720)}
